# Supplementary material
Source: PubMed Central journal article supplement (PMC8068579)
Supplement: NIHMS1647199-supplement-1.pdf [file NIHMS1647199-supplement-1.pdf]

**Supplementary Figure 1.** Percentage of H3K27ac peaks in the public available data overlapping with the patient normal samples.

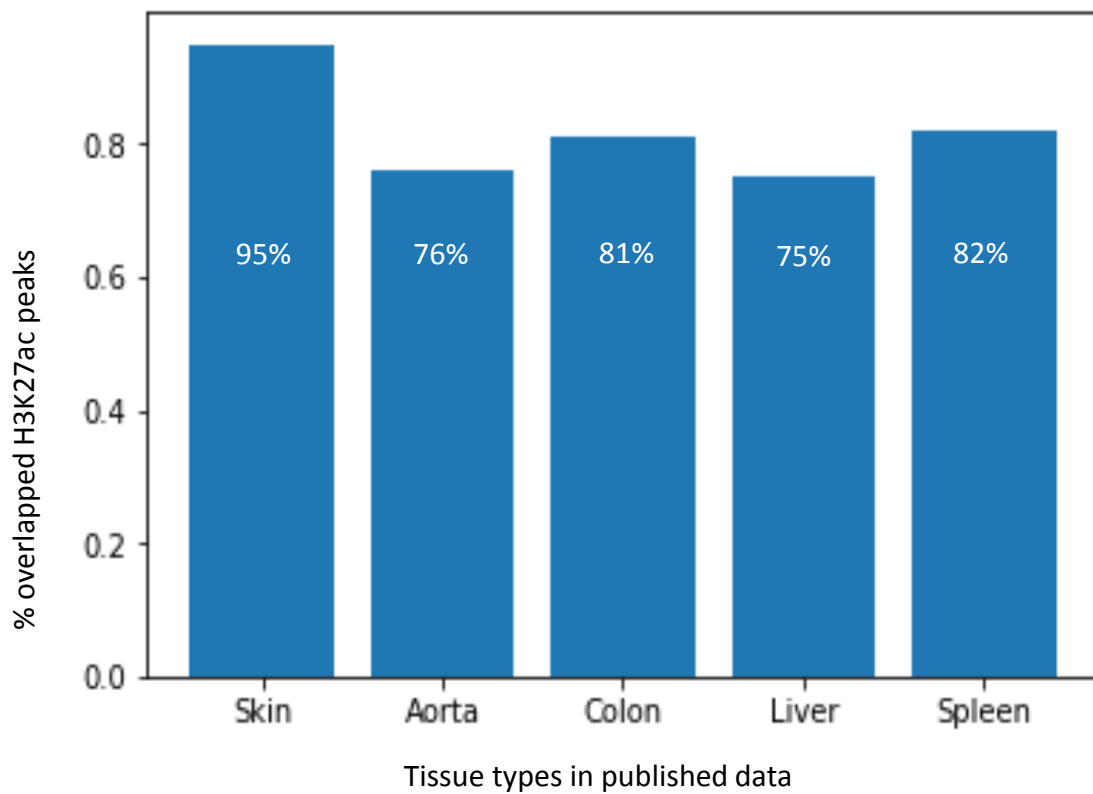

**Supplementary Figure 2.** H3K27ac specific regions for SCC and BCC separate the normal and cancer samples. (a) principal components analysis (PCA) shows the separation of samples before and after differential peak analysis from DESeq2, and (b) Heatmap shows the clustering of normal and cancer samples after after differential peak analysis from DESeq2.

a. 3-D PCA before and after DESeq2

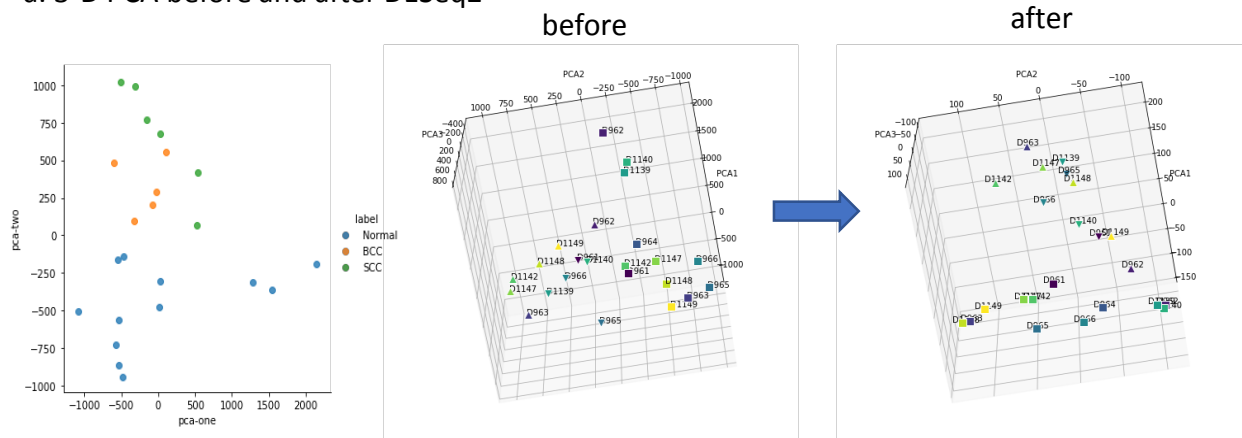

b. Heatmap sample classification after DESeq2

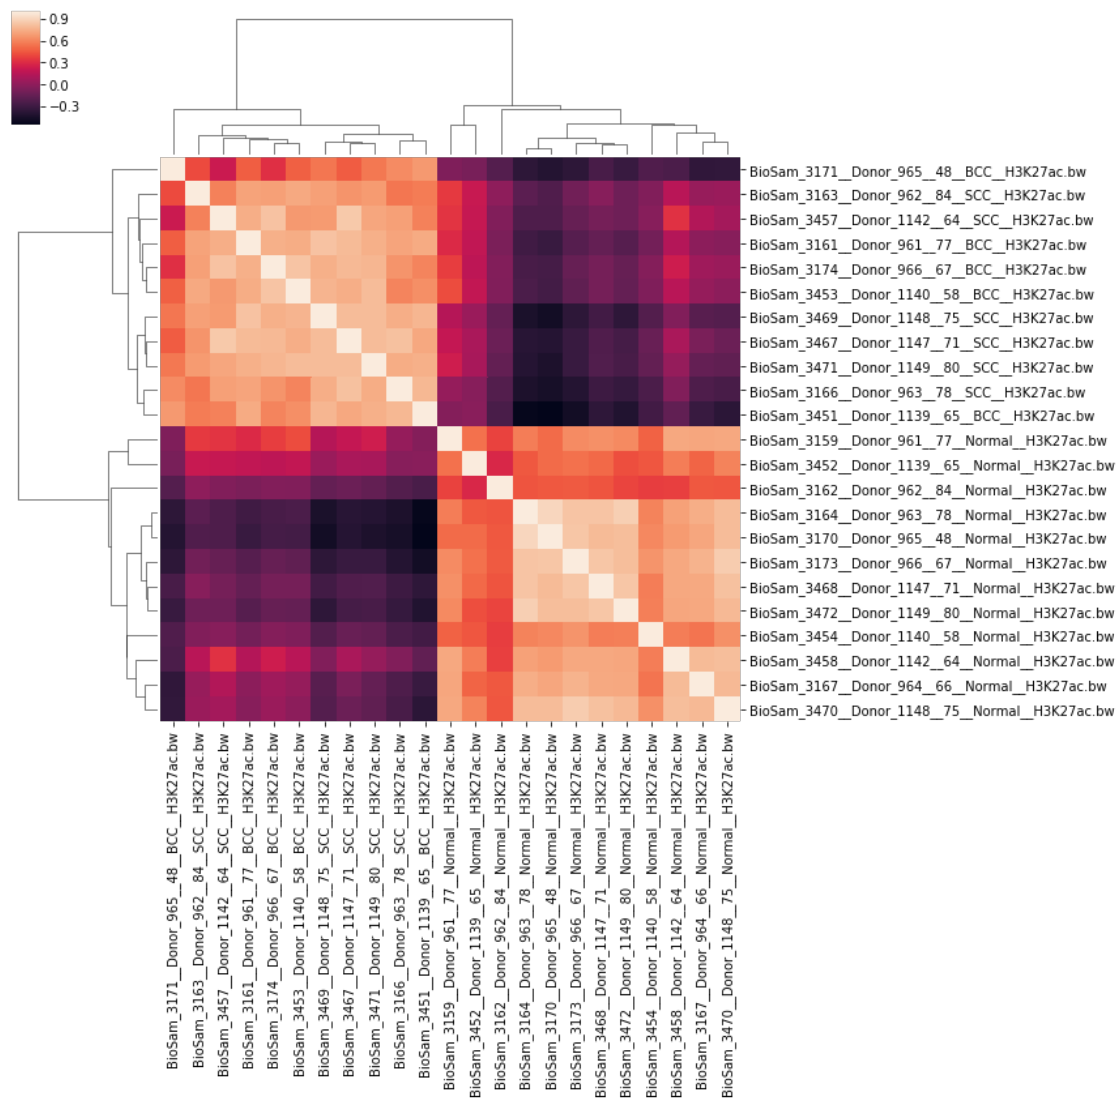

# Supplementary Figure 3. GREAT analyses on H3K27ac down regulated SCC: (a) SCC down-regulated Biological Process and (b) SCC down-regulated MsigDB perturbation signatures

## a. SCC down-regulated Biological Process

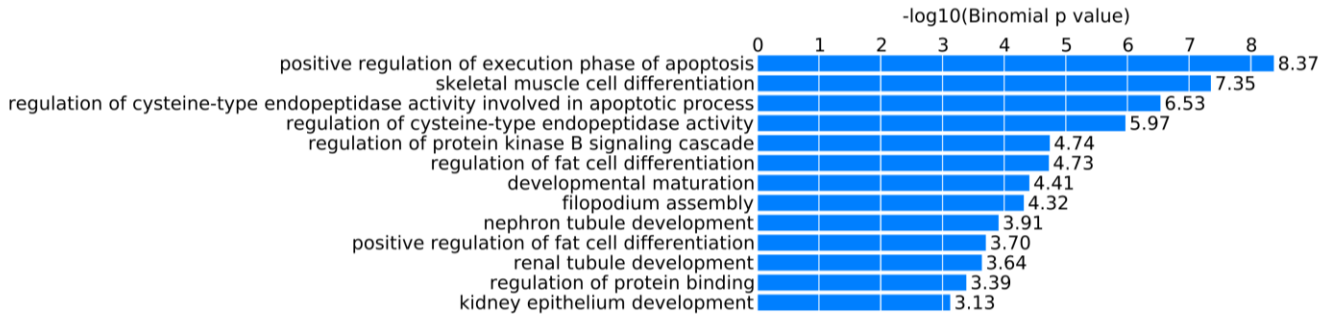

## b. SCC down-regulated MsigDB perturbation signatures

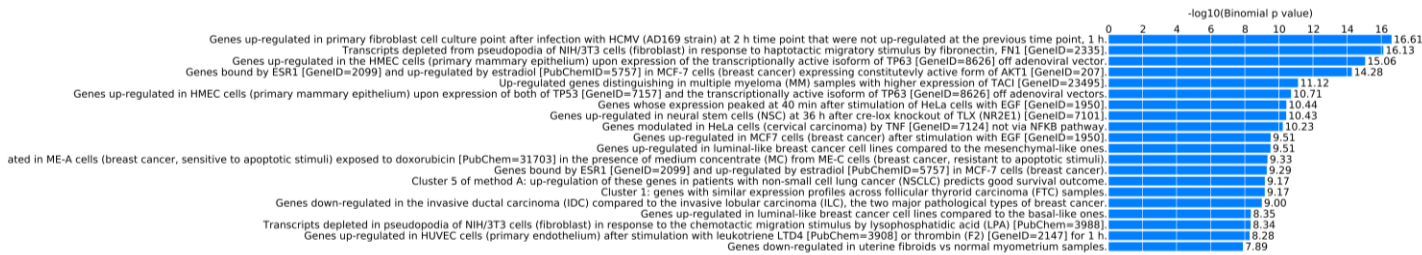

**Supplementary Figure 4.** Relationship between H3K27ac peaks and putative target gene expressions from published data of (a) BCC and (b) SCC

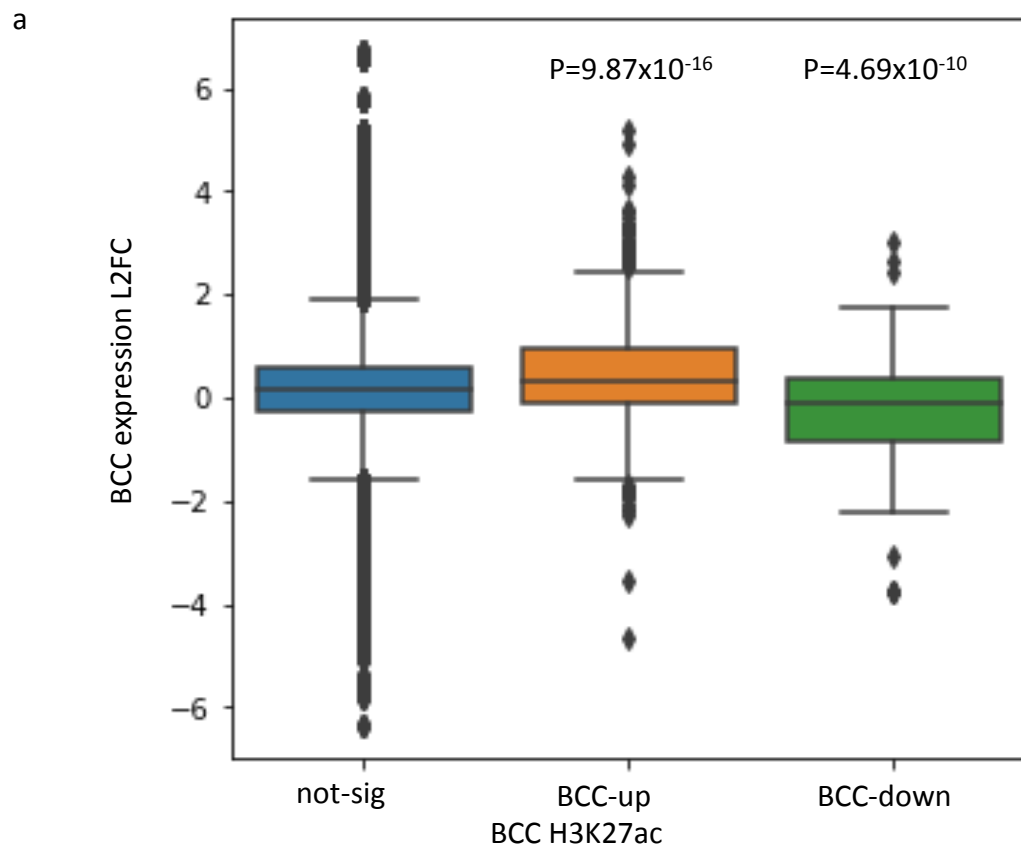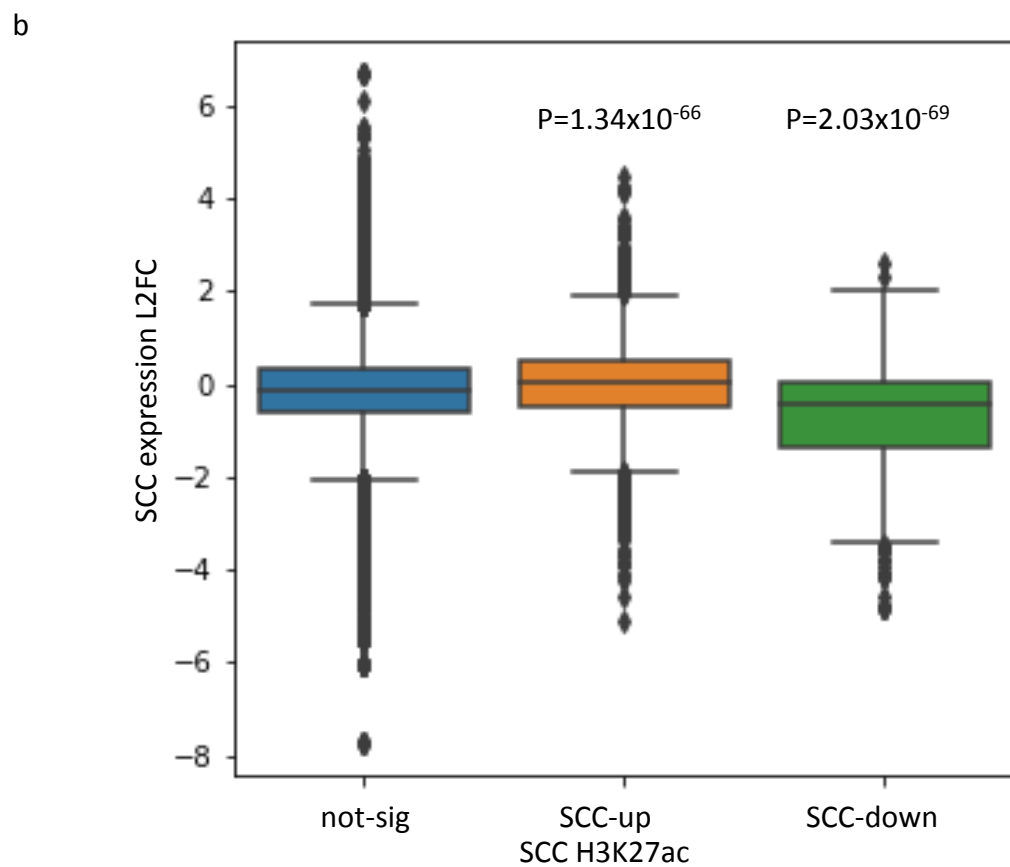

**Supplementary Figure 5.** Venn diagrams show the number of overlapped genes near significantly regulated H3K27ac peaks and mRNA expressions in (a) BCC samples and (b) SCC samples.

a

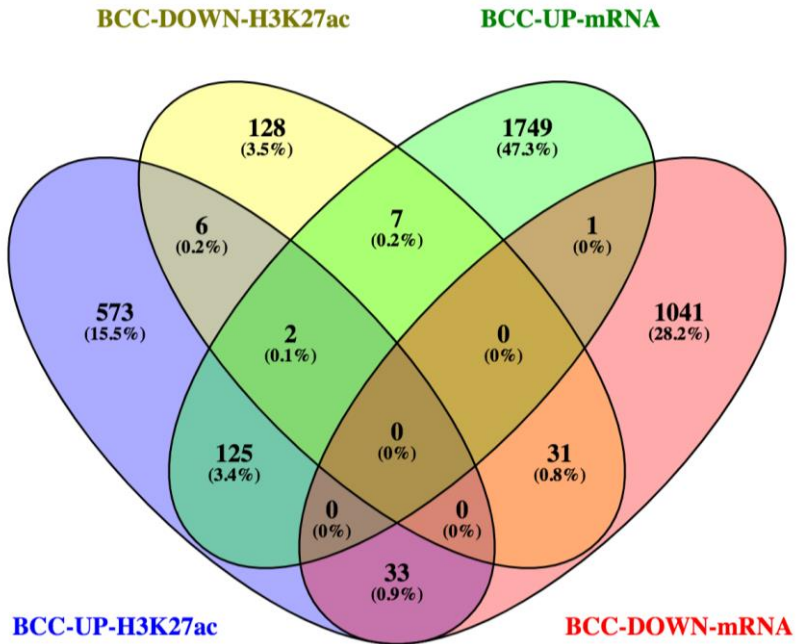

b

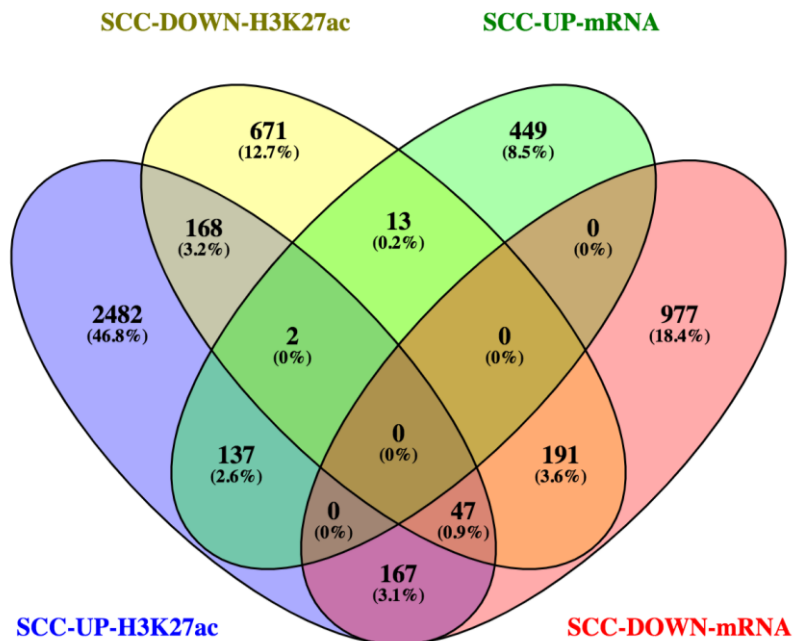

## Supplementary Figure 6. Trends between significant cancer-specific H3K27ac peaks and putative gene expressions

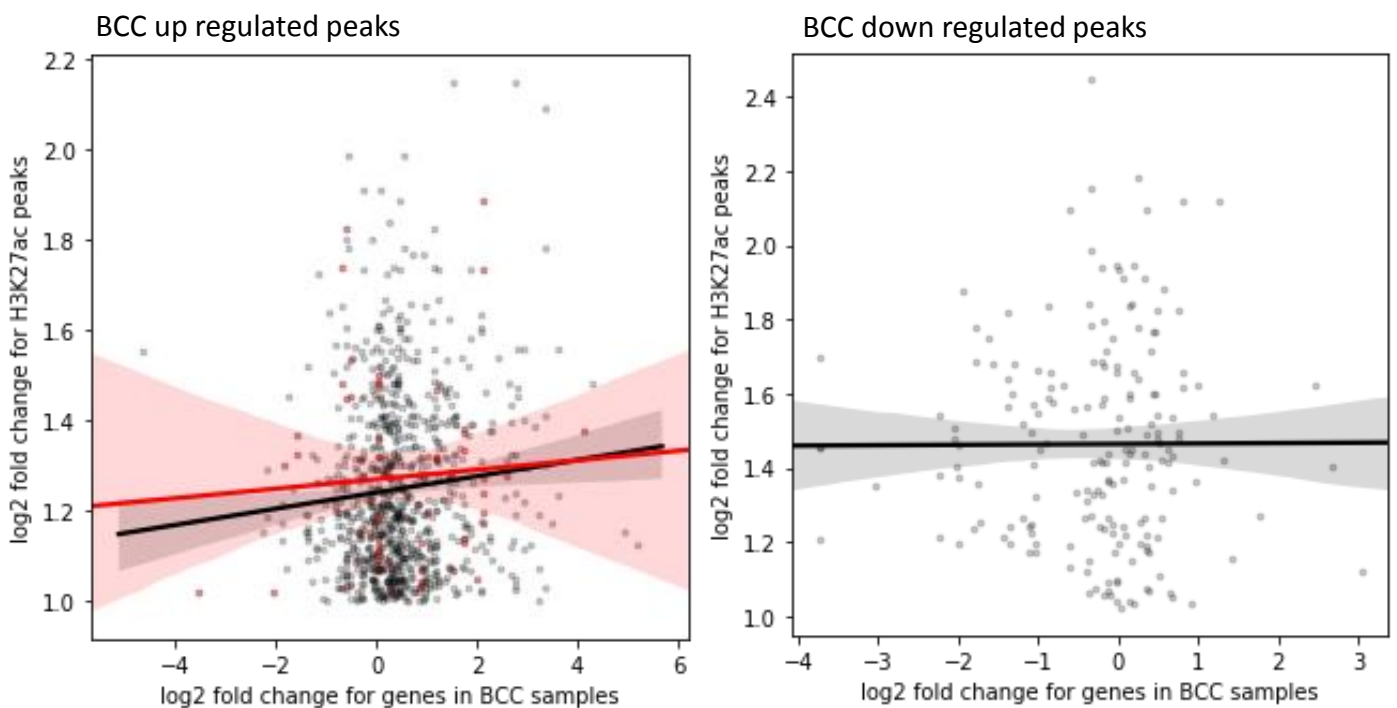

\*Red: genes in GO:0043588 (skin development)

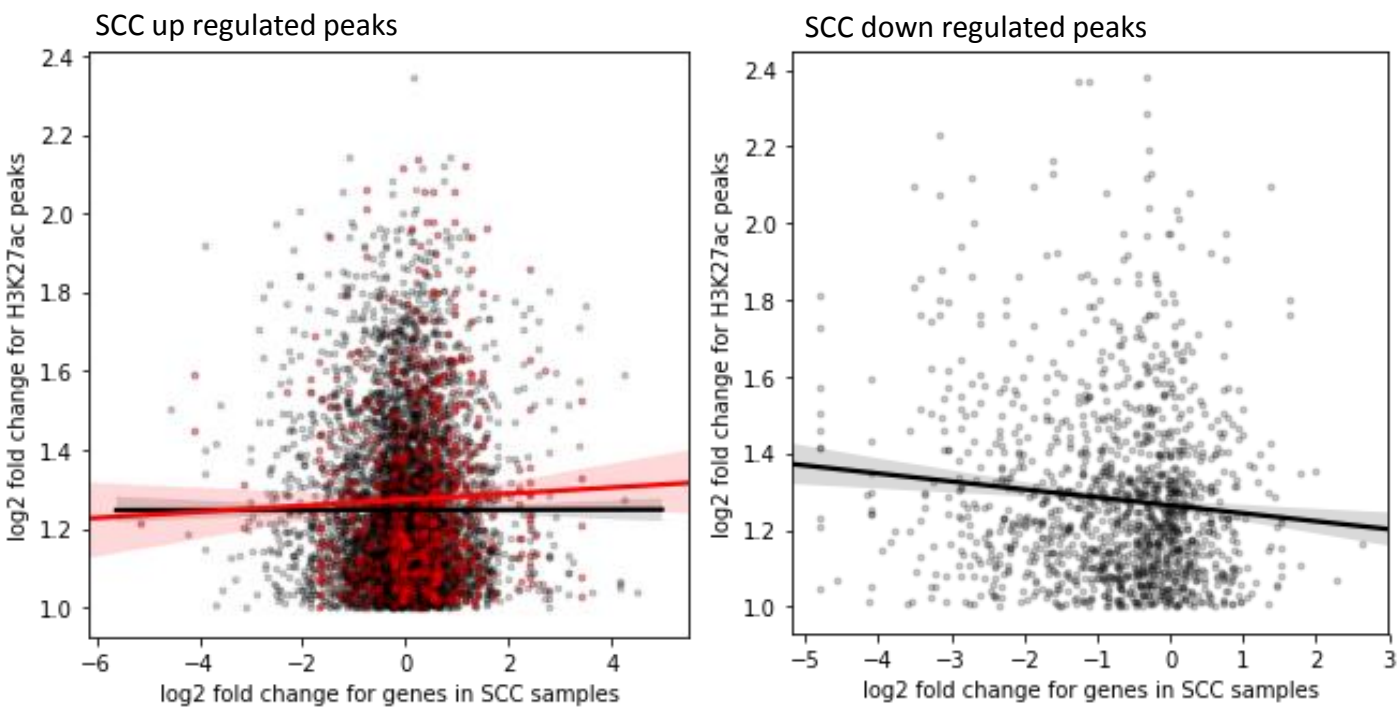

\*Red: genes in GO:0002682 (immune response)

**Supplementary Figure 7.** gene expression for family genes: (a) JUN, (b) SMAD, (c) NFKB, (d) FGFR, and (e) WNT

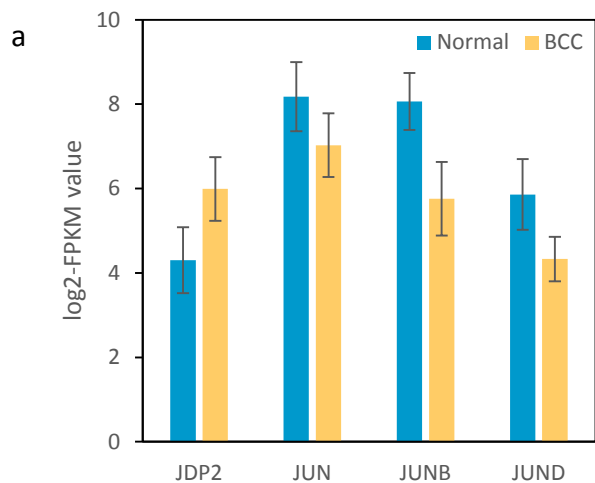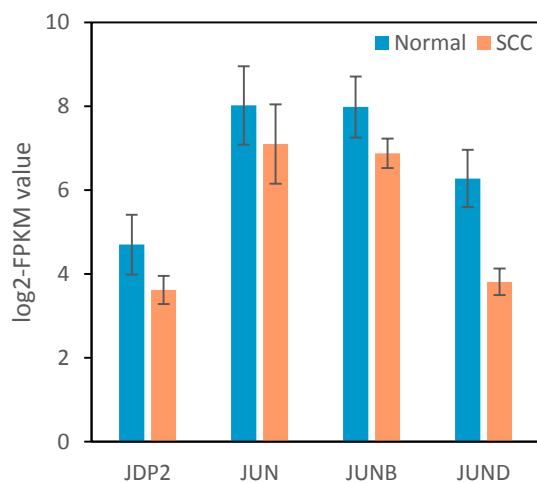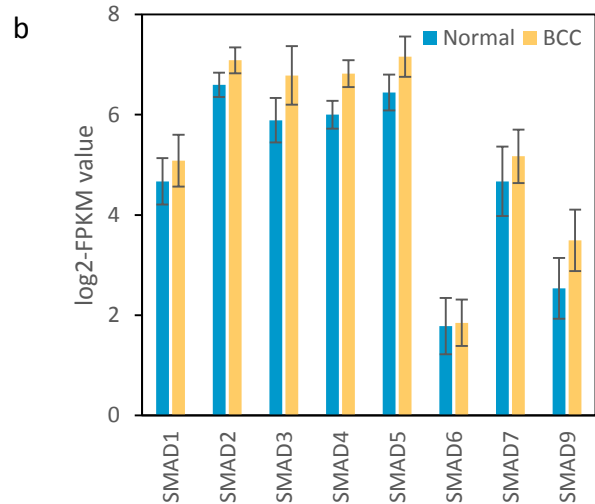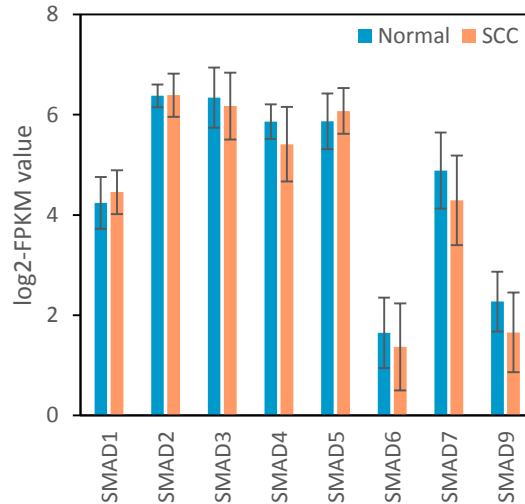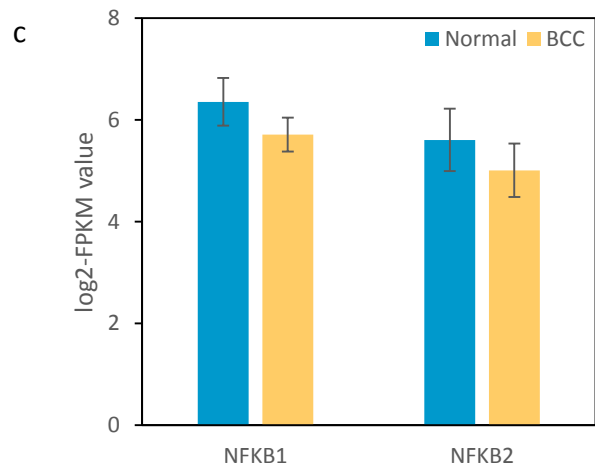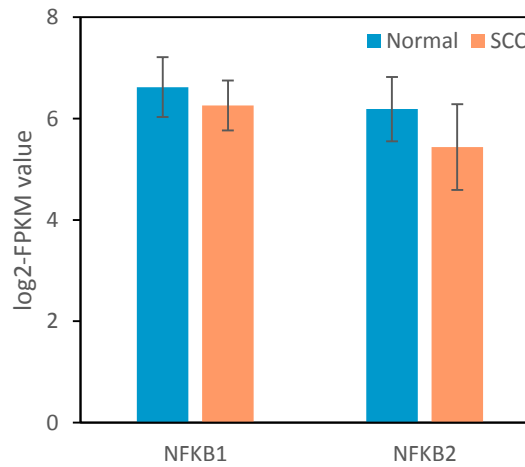

# Supplementary Figure 7. Continued

d

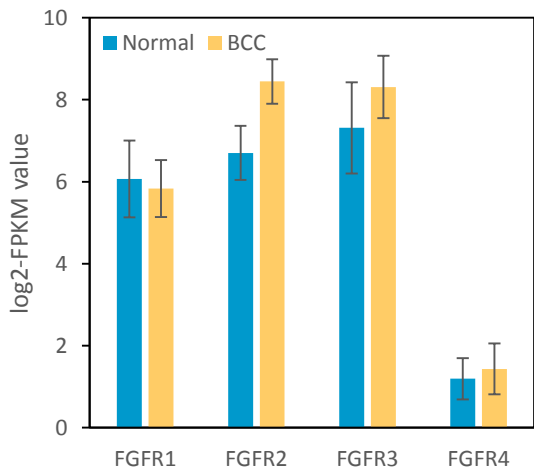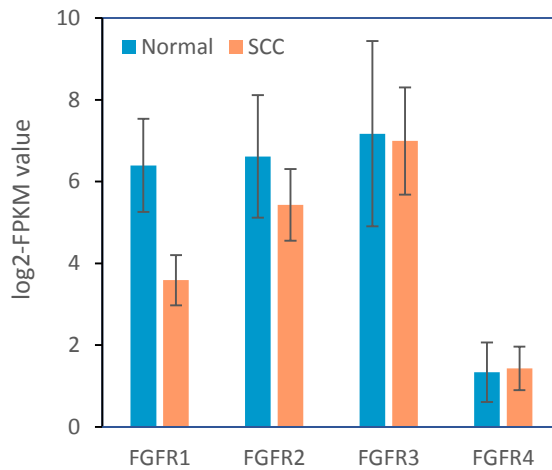

e

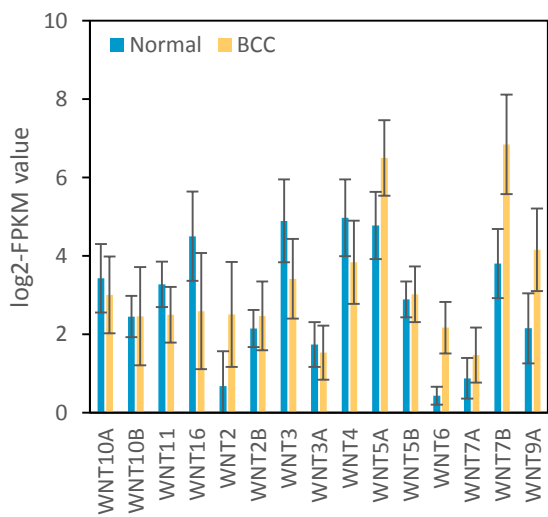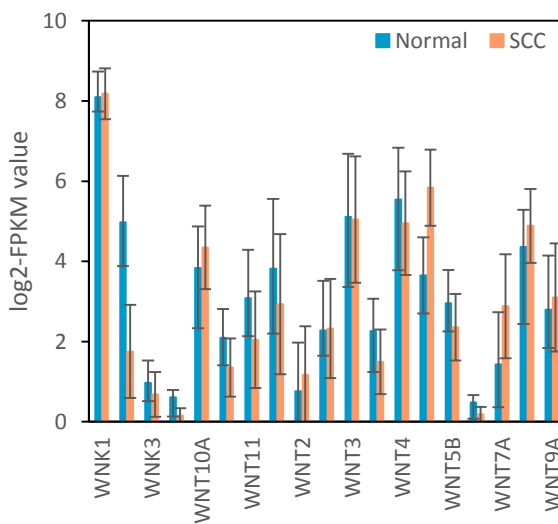



## Supplementary Figure 8. SCC up regulated binding motifs compared to directly to BCC samples: (a) Haystack top 5 motifs and (b) Homer top 10 motifs

### a. Haystack

| Motif ID | Motif Name    | Presence in Target | Presence in BG | Ratio | p-value  | q-value  | Central Enrichment | Motif Profile | Logo |
|----------|---------------|--------------------|----------------|-------|----------|----------|--------------------|---------------|------|
| MA0112.3 | ESR1          | 80.77%             | 40.38%         | 1.98  | 8.05e-04 | 1.83e-01 | 1.51               |               |      |
| MA0694.1 | ZBTB7B        | 88.46%             | 55.77%         | 1.58  | 4.69e-03 | 2.67e-01 | 1.21               |               |      |
| MA0695.1 | ZBTB7C        | 92.31%             | 63.46%         | 1.45  | 6.87e-03 | 3.13e-01 | 1.46               |               |      |
| MA0003.3 | TFAP2A        | 100.00%            | 75.00%         | 1.33  | 3.46e-03 | 2.63e-01 | 2.24               |               |      |
| MA0814.1 | TFAP2C(var.2) | 100.00%            | 75.00%         | 1.33  | 3.46e-03 | 2.63e-01 | 2.04               |               |      |

### b. HOMER

| Rank | Motif | P-value | log P-value | % of Targets | % of Background | STD(Bg STD)     | Best Match/Details                                                                                                                         |
|------|-------|---------|-------------|--------------|-----------------|-----------------|--------------------------------------------------------------------------------------------------------------------------------------------|
| 1 *  |       | 1e-8    | -2.009e+01  | 15.69%       | 0.67%           | 76.1bp (63.2bp) | HMBOX1/MA0895.1/Jaspar(0.744)<br><a href="#">More Information</a>   <a href="#">Similar Motifs Found</a>                                   |
| 2 *  |       | 1e-8    | -1.968e+01  | 13.73%       | 0.43%           | 46.2bp (65.8bp) | ZNF416(Zf)/HEK293-ZNF416.GFP-ChIP-Seq(GSE58341)/Homer(0.572)<br><a href="#">More Information</a>   <a href="#">Similar Motifs Found</a>    |
| 3 *  |       | 1e-6    | -1.476e+01  | 27.45%       | 5.45%           | 54.0bp (71.8bp) | POU5F1/MA1115.1/Jaspar(0.709)<br><a href="#">More Information</a>   <a href="#">Similar Motifs Found</a>                                   |
| 4 *  |       | 1e-5    | -1.346e+01  | 13.73%       | 1.10%           | 56.2bp (63.8bp) | PB0138.1_Irf4_2/Jaspar(0.660)<br><a href="#">More Information</a>   <a href="#">Similar Motifs Found</a>                                   |
| 5 *  |       | 1e-5    | -1.287e+01  | 25.49%       | 5.46%           | 57.9bp (63.2bp) | Gata1/MA0035.3/Jaspar(0.688)<br><a href="#">More Information</a>   <a href="#">Similar Motifs Found</a>                                    |
| 6 *  |       | 1e-5    | -1.241e+01  | 9.80%        | 0.46%           | 51.1bp (56.9bp) | Atf3/MA0605.1/Jaspar(0.650)<br><a href="#">More Information</a>   <a href="#">Similar Motifs Found</a>                                     |
| 7 *  |       | 1e-3    | -7.825e+00  | 11.76%       | 1.90%           | 32.9bp (61.2bp) | PB0121.1_Foxj3_2/Jaspar(0.674)<br><a href="#">More Information</a>   <a href="#">Similar Motifs Found</a>                                  |
| 8 *  |       | 1e-2    | -6.860e+00  | 1.96%        | 0.00%           | 0.0bp (14.3bp)  | PB0152.1_Nkx3-1_2/Jaspar(0.733)<br><a href="#">More Information</a>   <a href="#">Similar Motifs Found</a>                                 |
| 9 *  |       | 1e-2    | -6.860e+00  | 1.96%        | 0.00%           | 0.0bp (14.9bp)  | REL/MA0101.1/Jaspar(0.651)<br><a href="#">More Information</a>   <a href="#">Similar Motifs Found</a>                                      |
| 10 * |       | 1e-2    | -6.860e+00  | 1.96%        | 0.00%           | 0.0bp (5.4bp)   | NFkB-p65-Rel(RHD)/ThioMac-LPS-Expression(GSE23622)/Homer(0.674)<br><a href="#">More Information</a>   <a href="#">Similar Motifs Found</a> |
| 11 * |       | 1e-2    | -6.792e+00  | 21.57%       | 7.44%           | 51.8bp (61.6bp) | PB0187.1_Tcf7_2/Jaspar(0.637)<br><a href="#">More Information</a>   <a href="#">Similar Motifs Found</a>                                   |

# Supplementary Figure 9. HOMER TF motif enrichment results for down-regulated H3K27ac peaks in (a) SCC samples and (b) BCC samples.

a

| Rank | Motif | Name                                                             | P-value | log P-value | q-value (Benjamini) | # Target Sequences with Motif | % of Targets Sequences with Motif | # Background Sequences with Motif | % of Background Sequences with Motif |
|------|-------|------------------------------------------------------------------|---------|-------------|---------------------|-------------------------------|-----------------------------------|-----------------------------------|--------------------------------------|
| 1    |       | NF1-halfsite(CTF)/LNCaP-NF1-ChIP-Seq(Unpublished)/Homer          | 1e-3    | -8.707e+00  | 0.0708              | 214.0                         | 23.29%                            | 9062.0                            | 18.51%                               |
| 2    |       | RORg(NR)/Liver-Rorc-ChIP-Seq(GSE101115)/Homer                    | 1e-3    | -8.592e+00  | 0.0708              | 11.0                          | 1.20%                             | 152.1                             | 0.31%                                |
| 3    |       | Mef2a(MADS)/HL1-Mef2a.biotin-ChIP-Seq(GSE21529)/Homer            | 1e-3    | -7.467e+00  | 0.0815              | 24.0                          | 2.61%                             | 599.4                             | 1.22%                                |
| 4    |       | Foxf1(Forkhead)/Lung-Foxf1-ChIP-Seq(GSE77951)/Homer              | 1e-3    | -6.915e+00  | 0.1063              | 37.0                          | 4.03%                             | 1128.6                            | 2.30%                                |
| 5    |       | Smad3(MAD)/NPC-Smad3-ChIP-Seq(GSE36673)/Homer                    | 1e-2    | -6.759e+00  | 0.1063              | 272.0                         | 29.60%                            | 12298.0                           | 25.11%                               |
| 6    |       | FOXK1(Forkhead)/HEK293-FOXK1-ChIP-Seq(GSE51673)/Homer            | 1e-2    | -6.677e+00  | 0.1063              | 48.0                          | 5.22%                             | 1600.4                            | 3.27%                                |
| 7    |       | RORa(NR)/Liver-Rora-ChIP-Seq(GSE101115)/Homer                    | 1e-2    | -6.613e+00  | 0.1063              | 14.0                          | 1.52%                             | 287.7                             | 0.59%                                |
| 8    |       | Erra(NR)/HepG2-Erra-ChIP-Seq(GSE31477)/Homer                     | 1e-2    | -6.582e+00  | 0.1063              | 254.0                         | 27.64%                            | 11427.3                           | 23.34%                               |
| 9    |       | ERRg(NR)/Kidney-ESRRG-ChIP-Seq(GSE104905)/Homer                  | 1e-2    | -6.572e+00  | 0.1063              | 86.0                          | 9.36%                             | 3289.5                            | 6.72%                                |
| 10   |       | THRb(NR)/HepG2-THRb.Flag-ChIP-Seq(Encode)/Homer                  | 1e-2    | -6.501e+00  | 0.1063              | 104.0                         | 11.32%                            | 4128.9                            | 8.43%                                |
| 11   |       | THRb(NR)/Liver-NR1A2-ChIP-Seq(GSE52613)/Homer                    | 1e-2    | -6.385e+00  | 0.1063              | 378.0                         | 41.13%                            | 17819.0                           | 36.39%                               |
| 12   |       | Mef2b(MADS)/HEK293-Mef2b.V5-ChIP-Seq(GSE67450)/Homer             | 1e-2    | -6.283e+00  | 0.1063              | 38.0                          | 4.13%                             | 1212.9                            | 2.48%                                |
| 13   |       | Hoxa13(Homeobox)/ChickenMSG-Hoxa13.Flag-ChIP-Seq(GSE86088)/Homer | 1e-2    | -5.901e+00  | 0.1063              | 107.0                         | 11.64%                            | 4351.5                            | 8.89%                                |
| 14   |       | RAR:RXR(NR).DR5/ES-RAR-ChIP-Seq(GSE56893)/Homer                  | 1e-2    | -5.872e+00  | 0.1063              | 9.0                           | 0.98%                             | 153.3                             | 0.31%                                |
| 15   |       | Zac1(Zf)/Neuro2A-Plagl1-ChIP-Seq(GSE75942)/Homer                 | 1e-2    | -5.635e+00  | 0.1063              | 443.0                         | 48.20%                            | 21416.0                           | 43.74%                               |

b

| Rank | Motif | Name                                            | P-value | log P-value | q-value (Benjamini) | # Target Sequences with Motif | % of Targets Sequences with Motif | # Background Sequences with Motif | % of Background Sequences with Motif |
|------|-------|-------------------------------------------------|---------|-------------|---------------------|-------------------------------|-----------------------------------|-----------------------------------|--------------------------------------|
| 1    |       | THRb(NR)/HepG2-THRb.Flag-ChIP-Seq(Encode)/Homer | 1e-4    | -9.770e+00  | 0.0245              | 24.0                          | 19.05%                            | 3961.4                            | 7.99%                                |
| 2    |       | Gata6(Zf)/HUG1N-GATA6-ChIP-Seq(GSE51936)/Homer  | 1e-2    | -5.810e+00  | 0.6412              | 10.0                          | 7.94%                             | 1388.3                            | 2.80%                                |
| 3    |       | THRa(NR)/C17.2-THRa-ChIP-Seq(GSE38347)/Homer    | 1e-2    | -5.647e+00  | 0.6412              | 13.0                          | 10.32%                            | 2161.6                            | 4.36%                                |

**Supplementary Figure 10.** Gene expression for FOXP genes shows that FOXP1 has higher expression levels (FPKM) than other members in keratinocytes in (a) NHEK and SCC cells, (b) normal and BCC cells, and (c) normal and SCC cells.

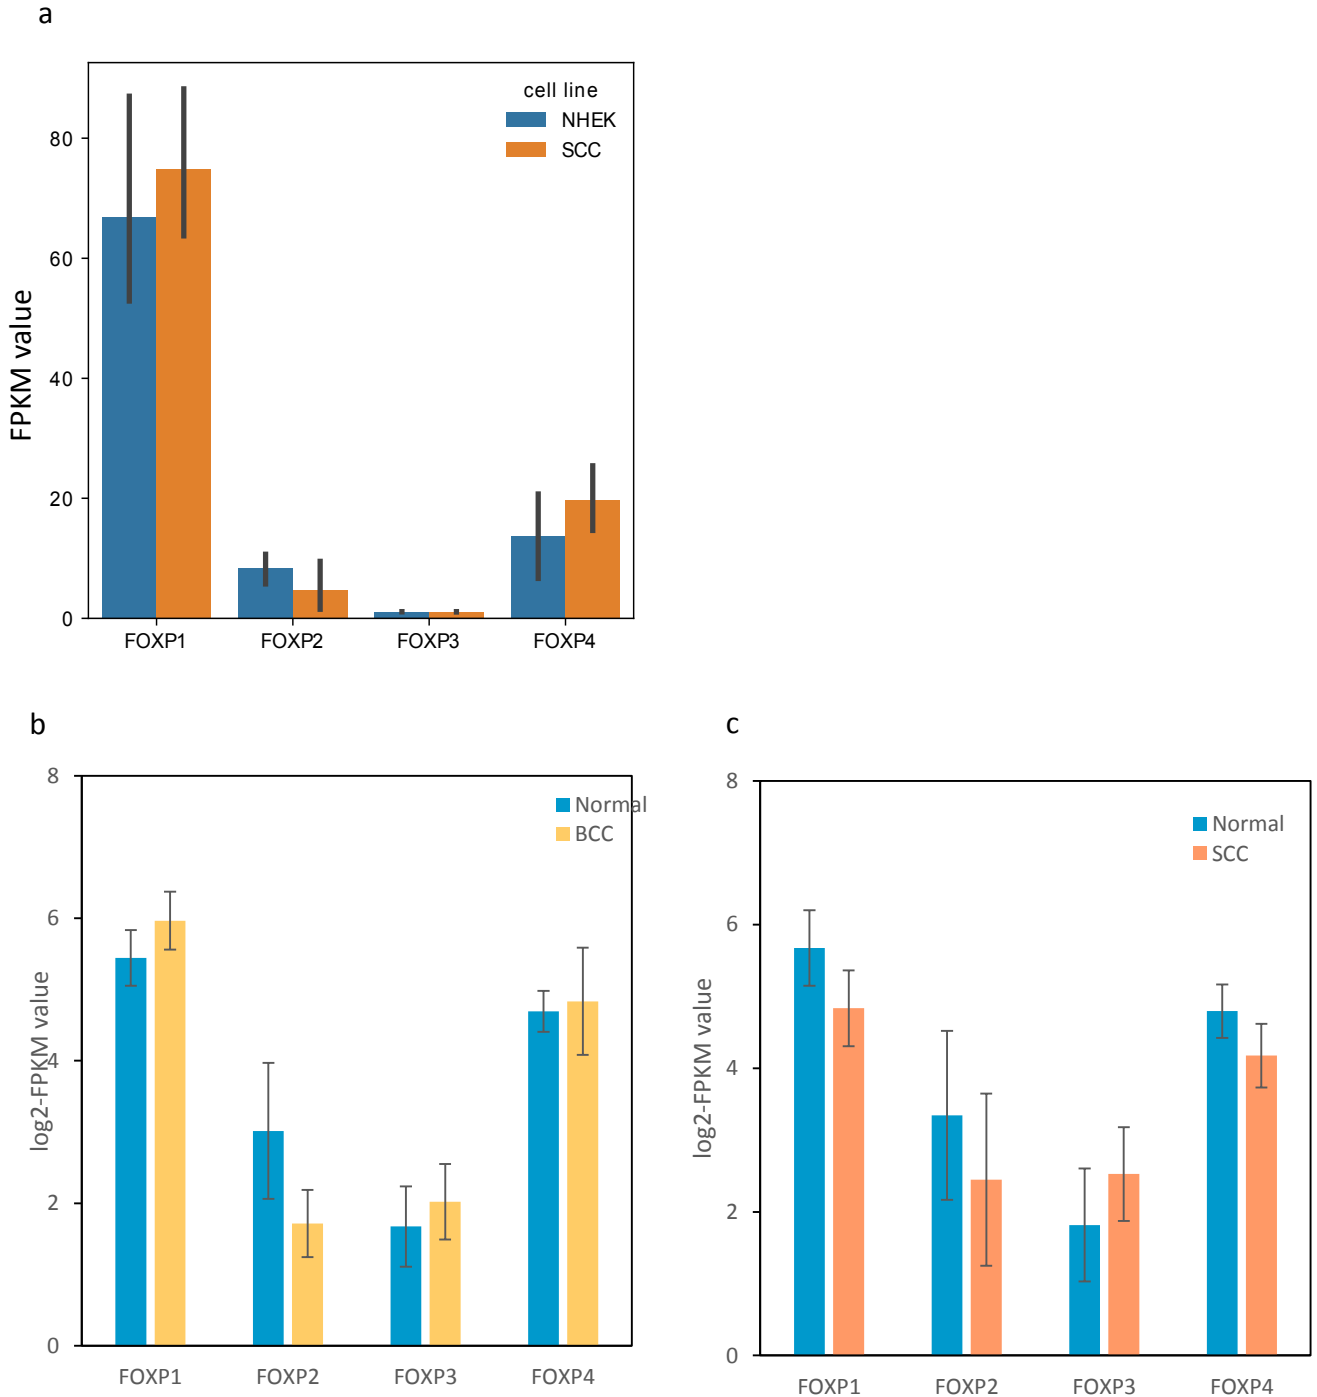

**Supplementary Table 1-1. BCC up-regulated H3K27ac peaks and their target genes**

**chrom:** chromosome in hg19

**start:** peak start position in hg19

**end:** peak end position in hg19

**target:** putative target gene(s) from GREAT analysis, gene (distance to the peak)

| BCC-upregulated H3K27ac peaks |           |           |                                             |
|-------------------------------|-----------|-----------|---------------------------------------------|
| Chr                           | Start     | End       | Target                                      |
| chr12                         | 104871481 | 104873181 | CHST11 (+21580), SLC41A2 (+450102)          |
| chr15                         | 22448341  | 22449034  | TUBGCP5 (-384707), OR4N4 (+66306)           |
| chr11                         | 104575424 | 104576662 | PDGFD (-541208), CASP12 (+193117)           |
| chr7                          | 3132233   | 3132734   | SDK1 (-208596), CARD11 (-48905)             |
| chr5                          | 86417337  | 86417838  | RASA1 (-146117), COX7C (+503815)            |
| chr2                          | 197127182 | 197127994 | STK17B (-91289), HECW2 (+329747)            |
| chr22                         | 19878420  | 19880541  | COMT (-49649), GNB1L (-37019)               |
| chr5                          | 39176978  | 39177706  | RICTOR (-102832), FYB (+93417)              |
| chr22                         | 17699725  | 17700226  | CECR5 (-59809), CECR1 (+2903)               |
| chr1                          | 32354799  | 32355522  | SPOCD1 (-73509), PTP4A2 (+48827)            |
| chr9                          | 101819307 | 101822442 | TGFBR1 (-46496), COL15A1 (+114954)          |
| chr5                          | 169723413 | 169725687 | LCP2 (+681)                                 |
| chr3                          | 55519129  | 55522574  | LRTM1 (-558751), WNT5A (+3121)              |
| chr11                         | 128480585 | 128481620 | FLI1 (-82787), ETS1 (-23666)                |
| chr13                         | 40351299  | 40351800  | COG6 (+121736), FOXO1 (+889184)             |
| chr12                         | 47670022  | 47671507  | AMIGO2 (-197117), RPAP3 (+429079)           |
| chr8                          | 134151205 | 134152602 | SLA (-79301), WISP1 (-51378)                |
| chr7                          | 50307013  | 50308538  | IKZF1 (-40542), C7orf72 (+172144)           |
| chr2                          | 189466055 | 189466682 | COL3A1 (-372677), GULP1 (+308810)           |
| chr17                         | 57841368  | 57842237  | VMP1 (+56977), TUBD1 (+128493)              |
| chr1                          | 234907247 | 234909773 | IRF2BP2 (-163239), TOMM20 (+383741)         |
| chr8                          | 134164132 | 134165796 | SLA (-92361), WISP1 (-38318)                |
| chr9                          | 21558385  | 21560043  | MTAP (-243328), IFNE (-76902)               |
| chr16                         | 87928245  | 87931608  | SLC7A5 (-26833), CA5A (+40195)              |
| chr7                          | 45066503  | 45068093  | CCM2 (+673)                                 |
| chr19                         | 8634371   | 8636559   | ZNF414 (-56421), MYO1F (+6996)              |
| chr5                          | 34498630  | 34500034  | C1QTNF3 (-455395), RAI14 (-185327)          |
| chr10                         | 81082003  | 81082910  | PPIF (-24777), ZMIZ1 (+253665)              |
| chr6                          | 30476909  | 30477781  | PRR3 (-47318), HLA-E (+20101)               |
| chr6                          | 169434925 | 169435907 | THBS2 (+218723), SMOC2 (+593585)            |
| chr11                         | 89112637  | 89115967  | NOX4 (+110351), TYR (+203682)               |
| chr2                          | 231526038 | 231526900 | CAB39 (-51091), SP100 (+245488)             |
| chr17                         | 57838144  | 57840866  | VMP1 (+54679), TUBD1 (+130791)              |
| chr1                          | 209941066 | 209943913 | TRAF3IP3 (+10647), IRF6 (+36899)            |
| chr5                          | 134769405 | 134770284 | H2AFY (-34533), C5orf20 (+13193)            |
| chr16                         | 81501996  | 81504508  | PLCG2 (-309611), CMIP (+24477)              |
| chr7                          | 17624999  | 17625500  | AHR (+287004), SNX13 (+354867)              |
| chr2                          | 132426825 | 132427790 | GPR39 (-746839), MZT2A (-177313)            |
| chr8                          | 8202300   | 8205236   | ENSG00000182319 (+40240), ZNF705B (+402624) |
| chr5                          | 1792884   | 1793557   | LPCAT1 (-269129), MRPL36 (+6788)            |
| chr17                         | 30878085  | 30878782  | CDK5R1 (+64797), MYO1D (+325761)            |
| chr19                         | 8641191   | 8642437   | MYO1F (+647)                                |
| chr1                          | 90222323  | 90224442  | LRRC8D (-63208), LRRC8C (+124752)           |
| chr17                         | 47294547  | 47297199  | ABI3 (+8284), PHOSPHO1 (+12255)             |
| chr18                         | 10139931  | 10140675  | APCDD1 (-314322), VAPA (+226244)            |
| chr20                         | 42569624  | 42572221  | TOX2 (+27431), JPH2 (+245295)               |
| chr3                          | 152861923 | 152864061 | RAP2B (-17037), P2RY1 (+310256)             |
| chr8                          | 61841481  | 61842166  | CLVS1 (-358690), CHD7 (+250487)             |

|       |           |           |                                    |
|-------|-----------|-----------|------------------------------------|
| chr14 | 62127566  | 62130225  | HIF1A (-35444), PRKCH (+340461)    |
| chr13 | 40350062  | 40350563  | COG6 (+120499), FOXO1 (+890421)    |
| chr1  | 159795811 | 159797414 | SLAMF8 (+73)                       |
| chr18 | 46358828  | 46361999  | SMAD7 (+116667), CTIF (+294885)    |
| chr20 | 36451053  | 36451554  | VSTM2L (-80202), CTNBL1 (+128896)  |
| chr12 | 50055168  | 50059785  | PRPF40B (+40258), FMNL3 (+43720)   |
| chr2  | 99079762  | 99082494  | INPP4A (+19807), COA5 (+143827)    |
| chr2  | 192351234 | 192352778 | NABP1 (-191252), MYO1B (+241891)   |
| chr18 | 10366757  | 10367258  | APCDD1 (-87617), VAPA (+452949)    |
| chr5  | 33789365  | 33790031  | ADAMTS12 (+102599), TARS (+348627) |
| chr7  | 150362735 | 150363825 | GIMAP6 (-33807), GIMAP2 (-19508)   |
| chr2  | 189678666 | 189679167 | COL3A1 (-160129), GULP1 (+521358)  |
| chr3  | 188634319 | 188635529 | TPRG1 (-254839), LPP (+704203)     |
| chr1  | 172606192 | 172610972 | FASLG (-19576), SUCO (+106225)     |
| chr2  | 113387908 | 113390104 | SLC20A1 (-14428), CHCHD5 (+46988)  |
| chr1  | 245913747 | 245915905 | KIF26B (+596539), SMYD3 (+755693)  |
| chr1  | 59395158  | 59395926  | FGGY (-367111), JUN (-145757)      |
| chr7  | 68741545  | 68742418  | AUTS2 (-322337)                    |
| chr18 | 10304242  | 10305701  | APCDD1 (-149653), VAPA (+390913)   |
| chr1  | 186157655 | 186158156 | PRG4 (-107505), HMCN1 (+454223)    |
| chr12 | 67753128  | 67753629  | DYRK2 (-289122), CAND1 (+90318)    |
| chr3  | 54908909  | 54910043  | LRTM1 (+52625), CACNA2D3 (+752783) |
| chr1  | 84609279  | 84610525  | PRKACB (-52)                       |
| chr8  | 49319315  | 49323469  | EFCAB1 (+326399), UBE2V2 (+400432) |
| chr1  | 30180789  | 30184847  | PTPRU (+619790)                    |
| chr9  | 75056470  | 75058230  | TMC1 (-79367), ZFAND5 (-77187)     |
| chr6  | 149357201 | 149357702 | TAB2 (-284736), UST (+288988)      |
| chr4  | 169552261 | 169554306 | PALLD (+135029), CBR4 (+378125)    |
| chr8  | 117435915 | 117436416 | TRPS1 (-754938), EIF3H (+331894)   |
| chr12 | 27332343  | 27332844  | STK38L (-64514), MED21 (+157111)   |
| chr7  | 92534127  | 92534628  | CDK6 (-71147), SAMD9 (+212958)     |
| chr5  | 42985030  | 42985531  | SEPP1 (-173100), ZNF131 (-136419)  |
| chr15 | 82374429  | 82374930  | MEX3B (-36198), EFTUD1 (+180424)   |
| chr8  | 82411709  | 82412381  | FABP4 (-16547), FABP12 (+31568)    |
| chr7  | 40337374  | 40337875  | C7orf10 (+163050)                  |
| chr1  | 167586598 | 167587099 | CREG1 (-63845), RCS1 (-12481)      |
| chr14 | 76298257  | 76298885  | TGFB3 (+148963), TTL5 (+170950)    |
| chr19 | 6801325   | 6803162   | EMR1 (-85339), VAV1 (+29507)       |
| chr2  | 85173145  | 85173915  | KCMF1 (-24686), TMSB10 (+40781)    |
| chr13 | 95920541  | 95921042  | SOX21 (-556403), ABCC4 (+32891)    |
| chr16 | 31880100  | 31881588  | ZNF267 (-4235)                     |
| chr13 | 21002770  | 21003271  | GJB6 (-196487), CRYL1 (+96975)     |
| chr9  | 135523378 | 135523879 | GTF3C4 (-21793), BARHL1 (+66057)   |
| chr18 | 53456541  | 53458263  | TCF4 (-154217), TXNL1 (+848474)    |
| chr20 | 11125205  | 11125706  | JAG1 (-470762)                     |
| chr1  | 198904810 | 198906714 | PTPRC (+297592)                    |
| chr1  | 160545538 | 160546039 | SLAMF6 (-52746), CD84 (+3505)      |
| chr8  | 49318285  | 49323865  | EFCAB1 (+326716), UBE2V2 (+400115) |
| chr21 | 40138686  | 40139187  | ERG (-105319), ETS2 (-38294)       |
| chr2  | 102012128 | 102012863 | CREG2 (-8439), RFX8 (+78669)       |
| chr6  | 45587952  | 45588453  | SUPT3H (-242533), CLIC5 (+459929)  |
| chr19 | 54875996  | 54876756  | LAIR1 (+188)                       |
| chr1  | 40524764  | 40526064  | CAP1 (+19509), PPT1 (+37961)       |
| chr6  | 143497136 | 143497637 | AIG1 (+115374), ADAT2 (+274423)    |
| chr11 | 76411936  | 76412437  | TSKU (-90609), LRRC32 (-31143)     |
| chr18 | 10376684  | 10380132  | APCDD1 (-76217), VAPA (+464349)    |

|       |           |           |                                      |
|-------|-----------|-----------|--------------------------------------|
| chr19 | 51625920  | 51628840  | SIGLEC9 (-785)                       |
| chr6  | 29676934  | 29677435  | ZFP57 (-32254), HLA-F (-14000)       |
| chr3  | 71544868  | 71545974  | FOXP1 (-365433), EIF4E3 (+229105)    |
| chr18 | 10365011  | 10365512  | APCDD1 (-89363), VAPA (+451203)      |
| chr2  | 25599916  | 25600417  | DNMT3A (-34708), DTNB (+296336)      |
| chr10 | 5605358   | 5608385   | CALML3 (+39948), ASB13 (+101669)     |
| chr3  | 46342823  | 46343532  | CCR2 (-52057), CCR3 (+59306)         |
| chr15 | 52772711  | 52777375  | MYO5C (-187048), MYO5A (+46204)      |
| chr6  | 45622844  | 45625012  | SUPT3H (-278258), CLIC5 (+424204)    |
| chr1  | 30180390  | 30186380  | PTPRU (+620357)                      |
| chr11 | 89112191  | 89117537  | NOX4 (+109789), TYR (+204244)        |
| chr1  | 111330223 | 111330724 | KCNA3 (-112819), CD53 (-85302)       |
| chr2  | 74803140  | 74804946  | DOK1 (+22830), M1AP (+71121)         |
| chr7  | 116923740 | 116924241 | WNT2 (+39352), ST7 (+330610)         |
| chr15 | 89610675  | 89611864  | MFGE8 (-154628), ABHD2 (-20111)      |
| chr12 | 67751187  | 67752167  | DYRK2 (-290824), CAND1 (+88616)      |
| chr12 | 9889519   | 9890237   | CLECL1 (-3983)                       |
| chr7  | 114570181 | 114572098 | MDFIC (+8931)                        |
| chr2  | 74801675  | 74802176  | DOK1 (+20713), M1AP (+73238)         |
| chr18 | 12047787  | 12050812  | ANKRD62 (-53405), IMPA2 (+67873)     |
| chr13 | 38019816  | 38022674  | CSNK1A1L (-341442), POSTN (+151736)  |
| chr17 | 42634181  | 42634814  | FZD2 (-427)                          |
| chr9  | 116430719 | 116431220 | ZNF618 (-207592), RGS3 (+223959)     |
| chr11 | 106913421 | 106914104 | GUCY1A2 (-24592), CWF19L2 (+414807)  |
| chr13 | 37743153  | 37743812  | CSNK1A1L (-63680), POSTN (+429498)   |
| chr5  | 39755442  | 39756142  | PTGER4 (-923808), DAB2 (-330520)     |
| chr10 | 14049803  | 14050834  | FRMD4A (+322564), PRPF18 (+421392)   |
| chr2  | 238209083 | 238210134 | COL6A3 (+113409), COPS8 (+215654)    |
| chrX  | 1619728   | 1620229   | ASMTL (-48213), P2RY8 (+36021)       |
| chr22 | 27529921  | 27531264  | CRYBA4 (+512665), MN1 (+666893)      |
| chr10 | 5637496   | 5638558   | ASB13 (+70514), CALML3 (+71103)      |
| chr6  | 1285806   | 1287824   | EXOC2 (-593704), FOXQ1 (-25860)      |
| chr1  | 205267211 | 205268418 | NUAK2 (+23068), TMCC2 (+70511)       |
| chr8  | 144272207 | 144273414 | LY6H (-30683), GPIHBP1 (-22257)      |
| chr10 | 64396684  | 64398727  | ADO (-166810), ZNF365 (+263755)      |
| chr3  | 142888556 | 142891052 | CHST2 (+51631), SLC9A9 (+677569)     |
| chr1  | 160678260 | 160678920 | SLAMF1 (-61505), CD48 (+3051)        |
| chr13 | 100863151 | 100863652 | PCCA (+122065), GGACT (+372849)      |
| chr21 | 46298633  | 46302403  | PTTG1IP (-6766), ITGB2 (+48270)      |
| chr7  | 40259859  | 40263266  | C7orf10 (+86988)                     |
| chr10 | 127837312 | 127837813 | ADAM12 (+239461), FANK1 (+252455)    |
| chr4  | 86623821  | 86624322  | ARHGAP24 (+227805), MAPK10 (+657144) |
| chr12 | 12111144  | 12111645  | BCL2L14 (-112478), ETV6 (+308607)    |
| chr3  | 101655124 | 101655973 | ZPLD1 (-498310), NFKBIZ (+87191)     |
| chr16 | 48491610  | 48493329  | SIAH1 (-92658), N4BP1 (+151650)      |
| chr1  | 79115590  | 79116240  | IFI44 (+399)                         |
| chr12 | 127653587 | 127654263 | NONE                                 |
| chr11 | 131934351 | 131934852 | NTM (+153246), OPCML (+878964)       |
| chr1  | 86620223  | 86621494  | ZNHIT6 (-446758), COL24A1 (+1587)    |
| chr7  | 17694083  | 17695883  | SNX13 (+285134), AHR (+356737)       |
| chr9  | 128283378 | 128285411 | MAPKAP1 (+185118), GAPVD1 (+260284)  |
| chr2  | 65033985  | 65035232  | SLC1A4 (-181926), SERTAD2 (-153562)  |
| chr20 | 30314941  | 30315751  | BCL2L1 (-4645)                       |
| chr1  | 112048852 | 112049353 | ADORA3 (-2993)                       |
| chr4  | 1194193   | 1199050   | SPON2 (-29961), CTBP1 (+46303)       |
| chr10 | 63156529  | 63158398  | RHOBTB1 (-453459), TMEM26 (+55744)   |

|       |           |           |                                    |
|-------|-----------|-----------|------------------------------------|
| chr2  | 189757170 | 189759529 | COL3A1 (-80696), GULP1 (+600791)   |
| chr4  | 13892871  | 13895087  | BOD1L1 (-264632)                   |
| chr2  | 238192615 | 238193116 | COL6A3 (+130152), COPS8 (+198911)  |
| chr2  | 238173454 | 238174161 | COL6A3 (+149210), COPS8 (+179853)  |
| chr13 | 37767525  | 37768026  | CSNK1A1L (-87973), POSTN (+405205) |
| chr14 | 93029280  | 93030725  | RIN3 (+49885), LGMN (+185021)      |
| chr3  | 99751882  | 99752759  | FILIP1L (+81036), COL8A1 (+395002) |
| chr5  | 95481548  | 95482339  | ELL2 (-184169), PCSK1 (+287040)    |
| chr6  | 37104628  | 37105945  | PIM1 (-32692), COX6A1P2 (+92680)   |
| chr2  | 200903686 | 200904187 | SPATS2L (-266937), TYW5 (-83478)   |
| chr7  | 128580333 | 128581232 | IRF5 (+2789), TNPO3 (+114185)      |
| chr17 | 30895460  | 30895961  | CDK5R1 (+82074), MYO1D (+308484)   |
| chr17 | 46561500  | 46562205  | SKAP1 (-54301), HOXB1 (+46506)     |
| chr5  | 111091629 | 111094516 | STARD4 (-244865), NREP (+219555)   |
| chr4  | 156811047 | 156811959 | ASIC5 (-24078), TDO2 (-13344)      |
| chr21 | 36724851  | 36726049  | RUNX1 (-303809), SETD4 (+707109)   |
| chr2  | 178294170 | 178294671 | AGPS (+37049), TTC30B (+123321)    |
| chr5  | 111283166 | 111285644 | STARD4 (-436197), NREP (+28223)    |
| chr20 | 1650364   | 1650865   | SIRPA (-225327), SIRPG (-12190)    |
| chr9  | 15725315  | 15726023  | PSIP1 (-214652)                    |
| chr15 | 39006601  | 39007234  | THBS1 (-866376), RASGRP1 (-149911) |
| chr1  | 198466677 | 198467178 | ATP6V1G3 (+43147), NEK7 (+340835)  |
| chr6  | 1145629   | 1146306   | EXOC2 (-452857), FOXQ1 (-166707)   |
| chr2  | 28351757  | 28352258  | FOSL2 (-263717), RBKS (-238043)    |
| chr20 | 58630773  | 58631450  | CDH26 (+97630)                     |
| chr1  | 192513949 | 192514450 | RGS1 (-30657), RGS21 (+228078)     |
| chr7  | 17701643  | 17703028  | SNX13 (+277781), AHR (+364090)     |
| chr8  | 82139216  | 82139717  | PAG1 (-115164), FABP5 (-53131)     |
| chr2  | 12997082  | 12997717  | TRIB2 (+140385)                    |
| chr17 | 37294389  | 37296512  | PLXDC1 (+12451), LASP1 (+269339)   |
| chr12 | 109299781 | 109300282 | DAO (+26226), SVOP (+72407)        |
| chr1  | 198898995 | 198899657 | PTPRC (+291156)                    |
| chr2  | 192501703 | 192503615 | NABP1 (-40599), MYO1B (+392544)    |
| chr6  | 106606937 | 106607438 | PRDM1 (+72993), ATG5 (+166478)     |
| chr15 | 55545356  | 55545857  | RSL24D1 (-56342), RAB27A (+16985)  |
| chr5  | 60614726  | 60616475  | SMIM15 (-157300), ZSWIM6 (-12499)  |
| chr2  | 216525884 | 216526589 | FN1 (-225342), MREG (+352109)      |
| chr5  | 134772309 | 134776032 | H2AFY (-38859), C5orf20 (+8867)    |
| chr2  | 232107295 | 232107796 | B3GNT7 (-152708), HTR2B (-117714)  |
| chr4  | 38372690  | 38373191  | KLF3 (-292876), PTTG2 (+410885)    |
| chr10 | 4169790   | 4170291   | AKR1E2 (-698405), KLF6 (-342574)   |
| chr9  | 21575610  | 21577176  | MTAP (-226149), IFNE (-94081)      |
| chr6  | 149355479 | 149355980 | TAB2 (-286458), UST (+287266)      |
| chr11 | 13237542  | 13238746  | ARNTL (-61201), TEAD1 (+471556)    |
| chr1  | 204482545 | 204483327 | MDM4 (-2575)                       |
| chr7  | 142937296 | 142937943 | GSTK1 (-22929), TAS2R40 (+18490)   |
| chr10 | 5627207   | 5627834   | CALML3 (+60597), ASB13 (+81020)    |
| chr4  | 146199782 | 146200964 | SMAD1 (-203590), OTUD4 (-99541)    |
| chr2  | 12842544  | 12843494  | TRIB2 (-13996)                     |
| chr14 | 81236183  | 81236874  | DIO2 (-558686), CEP128 (+171600)   |
| chr7  | 90676366  | 90677411  | FZD1 (-216894), CDK14 (+338177)    |
| chr7  | 17718050  | 17721657  | SNX13 (+260263), AHR (+381608)     |
| chr1  | 116323294 | 116326069 | CASQ2 (-13280), NHLH2 (+61856)     |
| chr7  | 89807911  | 89808412  | STEAP2 (-32838), STEAP1 (+24473)   |
| chr5  | 111016712 | 111018570 | STARD4 (-169433), NREP (+294987)   |
| chr11 | 128778509 | 128779505 | C11orf45 (-3415)                   |

|       |           |           |                                             |
|-------|-----------|-----------|---------------------------------------------|
| chr2  | 225276365 | 225278672 | FAM124B (-10768), CUL3 (+172546)            |
| chr2  | 33754835  | 33755499  | RASGRP3 (+53872)                            |
| chr18 | 53790857  | 53792465  | TCF4 (-488476), TXNL1 (+514215)             |
| chr19 | 42615800  | 42616301  | POU2F2 (+20528), ZNF574 (+41533)            |
| chr9  | 98823828  | 98824329  | ERCC6L2 (+186096), HSD17B3 (+240355)        |
| chr5  | 95484831  | 95486878  | ELL2 (-188080), PCSK1 (+283129)             |
| chr21 | 47971450  | 47972810  | S100B (+52991), DIP2A (+93106)              |
| chr8  | 8153373   | 8154217   | ENSG00000182319 (+90213), ZNF705B (+352651) |
| chr4  | 13908729  | 13909809  | BOD1L1 (-279922)                            |
| chr6  | 106034799 | 106035300 | PRDM1 (-499145), PREP (-184091)             |
| chr16 | 88335245  | 88340362  | ZNF469 (-156075), BANP (+334180)            |
| chr17 | 29279393  | 29280168  | RNF135 (-17438), ADAP2 (+31083)             |
| chr9  | 91769683  | 91770184  | SHC3 (+23748), S1PR3 (+158513)              |
| chr18 | 10239475  | 10240655  | APCDD1 (-214560), VAPA (+326006)            |
| chr9  | 115624543 | 115625638 | SLC46A2 (+28102), SNX30 (+111973)           |
| chr2  | 172101553 | 172102054 | TLK1 (-84461), METTL8 (+188792)             |
| chr13 | 37881128  | 37881756  | CSNK1A1L (-201639), POSTN (+291539)         |
| chr14 | 75083007  | 75088249  | LTBP2 (-6594), AREL1 (+94190)               |
| chr9  | 129921306 | 129923613 | GARNL3 (-104345), ANGPTL2 (-37298)          |
| chr4  | 13919091  | 13919726  | BOD1L1 (-290062)                            |
| chr15 | 38342400  | 38343413  | SPRED1 (-201620), TMC05A (+115449)          |
| chr13 | 38063423  | 38066451  | CSNK1A1L (-385134), POSTN (+108044)         |
| chr15 | 65701259  | 65701896  | IGDCC3 (-31200), IGDCC4 (+13832)            |
| chr10 | 75654013  | 75654514  | CAMK2G (-19921), PLAU (-16651)              |
| chr15 | 102155728 | 102156229 | PCSK6 (-126106), TM2D3 (+36591)             |
| chr13 | 46745898  | 46746864  | CPB2 (-67220), LCP1 (+39102)                |
| chr2  | 175700774 | 175702491 | CHRNA1 (-72444), CHN1 (+168321)             |
| chr3  | 55511144  | 55526179  | LRTM1 (-556561), WNT5A (+5311)              |
| chr12 | 96438615  | 96439116  | ELK3 (-149294), LTA4H (-9427)               |
| chr10 | 14048872  | 14052755  | FRMD4A (+322069), PRPF18 (+421887)          |
| chr3  | 55515028  | 55516034  | LRTM1 (-553430), WNT5A (+8442)              |
| chr5  | 150169522 | 150170807 | IRGM (-55920), SMIM3 (+12657)               |
| chr1  | 235153771 | 235155299 | IRF2BP2 (-409264), TOMM20 (+137716)         |
| chr1  | 198745731 | 198746232 | PTPRC (+137812)                             |
| chr14 | 23639983  | 23641128  | CEBPE (-51731), SLC7A8 (+12293)             |
| chr3  | 160121804 | 160122305 | IFT80 (-4735)                               |
| chr2  | 192500312 | 192500938 | NABP1 (-42633), MYO1B (+390510)             |
| chr12 | 118745016 | 118746246 | TAOK3 (+65119), PEBP1 (+171968)             |
| chr17 | 57826541  | 57853759  | VMP1 (+55324), TUBD1 (+130146)              |
| chr18 | 43381110  | 43384367  | SIGLEC15 (-22738), SLC14A1 (+76049)         |
| chr2  | 216564861 | 216565715 | FN1 (-264393), MREG (+313058)               |
| chr10 | 21687711  | 21688212  | NEBL (-501431), SKIDA1 (+126649)            |
| chr9  | 137394354 | 137395068 | COL5A1 (-138909), RXRA (+176285)            |
| chr2  | 132425601 | 132428239 | GPR39 (-747227), MZT2A (-176925)            |
| chr8  | 104357388 | 104358324 | CTHRC1 (-25887), FZD6 (+46797)              |
| chr10 | 5604965   | 5609495   | CALML3 (+40306), ASB13 (+101311)            |
| chr6  | 106040422 | 106040923 | PRDM1 (-493522), PREP (-189714)             |
| chr10 | 14051439  | 14052496  | FRMD4A (+320915), PRPF18 (+423041)          |
| chr5  | 76151662  | 76152465  | CRHBP (-96474), S100Z (+6140)               |
| chr6  | 44634461  | 44635826  | RUNX2 (-660962), CDC5L (+279882)            |
| chr18 | 46364921  | 46366009  | SMAD7 (+111616), CTIF (+299936)             |
| chr1  | 30852042  | 30852817  | MATN1 (+344004)                             |
| chr5  | 134582005 | 134582689 | PITX1 (-212359), H2AFY (+152965)            |
| chr15 | 81384732  | 81385233  | IL16 (-132758), MESDC2 (-102764)            |
| chr1  | 153358436 | 153359094 | S100A12 (-10640), S100A8 (+4899)            |
| chr9  | 118358039 | 118359800 | PAPPA (-557163), DEC1 (+454823)             |



|       |           |           |                                       |
|-------|-----------|-----------|---------------------------------------|
| chr17 | 46078154  | 46081443  | CDK5RAP3 (+31392), COPZ2 (+35340)     |
| chr18 | 46578917  | 46579418  | SMAD7 (-102087), DYM (+408004)        |
| chr5  | 34051437  | 34055140  | RAI14 (-631370), C1QTNF3 (-9352)      |
| chr5  | 100113371 | 100114057 | ST8SIA4 (+125256), FAM174A (+242705)  |
| chr8  | 49331155  | 49332879  | EFCAB1 (+315774), UBE2V2 (+411057)    |
| chr14 | 69224160  | 69225423  | ZFP36L1 (+35165), RAD51B (+938267)    |
| chr20 | 46419238  | 46421794  | SULF2 (-5186)                         |
| chr20 | 5634087   | 5635336   | CHGB (-257364), GPCPD1 (-43040)       |
| chr12 | 105710670 | 105711444 | APPL2 (-81196), NUAK1 (+822754)       |
| chr6  | 80934066  | 80934918  | BCKDHB (+118128)                      |
| chr7  | 101360492 | 101362359 | CUX1 (-97865), MYL10 (-88850)         |
| chr9  | 93732151  | 93732652  | SYK (+168333), AUH (+391793)          |
| chr3  | 11571027  | 11572511  | VGLL4 (+113629), ATG7 (+257667)       |
| chr6  | 22025533  | 22027727  | PRL (+271100), SOX4 (+432658)         |
| chr5  | 135348090 | 135348752 | LECT2 (-57698), TGFBI (-16163)        |
| chr13 | 50969677  | 50970178  | RNASEH2B (-513886), DLEU1 (+313621)   |
| chr18 | 10056827  | 10061882  | APCDD1 (-395270), VAPA (+145296)      |
| chr1  | 198462213 | 198462714 | ATP6V1G3 (+47611), NEK7 (+336371)     |
| chr10 | 98500791  | 98501585  | LCOR (-91549), PIK3AP1 (-20917)       |
| chr5  | 167836169 | 167837126 | RARS (-76802), WWC1 (+117493)         |
| chr6  | 45644871  | 45645652  | SUPT3H (-299592), CLIC5 (+402870)     |
| chr10 | 72432415  | 72432916  | ADAMTS14 (+107)                       |
| chr21 | 37801538  | 37803597  | CHAF1B (+44892), CLDN14 (+49820)      |
| chr4  | 54553455  | 54554570  | LNX1 (-96230), CHIC2 (+376844)        |
| chr2  | 206564271 | 206565869 | NRP2 (+17846), INO80D (+385836)       |
| chr2  | 163097412 | 163102671 | FAP (+3)                              |
| chr11 | 59952986  | 59953680  | MS4A6A (-2637)                        |
| chr20 | 25298093  | 25299140  | PYGB (+69912), ABHD12 (+73002)        |
| chr3  | 153331423 | 153333074 | ARHGEF26 (-506543), RAP2B (+452220)   |
| chr8  | 133957426 | 133959646 | TG (+79330), SLA (+114067)            |
| chr15 | 71920197  | 71923963  | SENP8 (-487112), THSD4 (+532789)      |
| chr6  | 114134761 | 114135262 | MARCKS (-43529)                       |
| chr20 | 46558362  | 46559255  | SULF2 (-143479), PREX1 (+885611)      |
| chr18 | 56517151  | 56517652  | ZNF532 (-12430), MALT1 (+178784)      |
| chr3  | 54988354  | 54989120  | LRTM1 (-26636), WNT5A (+535236)       |
| chr11 | 10612770  | 10615412  | LYVE1 (-23853), MRVI1 (+101208)       |
| chr9  | 117314383 | 117314884 | DFNB31 (-47384), ATP6V1G1 (-35392)    |
| chr8  | 11731589  | 11736136  | CTSB (-8125), DEFB136 (+98245)        |
| chr20 | 46555639  | 46556140  | SULF2 (-140560), PREX1 (+888530)      |
| chr12 | 116818861 | 116821143 | MAP1LC3B2 (-177184), MED13L (-104859) |
| chr12 | 22840130  | 22840758  | ETNK1 (+62435)                        |
| chr2  | 163112487 | 163112988 | FAP (-12693), IFIH1 (+62475)          |
| chr8  | 104383245 | 104385536 | CTHRC1 (+648)                         |
| chr2  | 189489146 | 189489973 | COL3A1 (-349486), GULP1 (+332001)     |
| chr5  | 95555631  | 95556132  | ELL2 (-258107), PCSK1 (+213102)       |
| chr6  | 6362959   | 6363460   | LY86 (-225131), F13A1 (-42143)        |
| chr5  | 33650474  | 33651109  | TARS (+209721), ADAMTS12 (+241505)    |
| chr8  | 105373054 | 105374451 | DCSTAMP (+21699), DPYS (+105528)      |
| chr6  | 21954299  | 21954981  | PRL (+343090), SOX4 (+360668)         |
| chr10 | 73132203  | 73132704  | SLC29A3 (+53439), C10orf105 (+347124) |
| chr14 | 20895956  | 20896913  | TEP1 (-14855), OSGEP (+26829)         |
| chr6  | 166672040 | 166672541 | T (-90184), SFT2D1 (+83788)           |
| chr2  | 158102463 | 158104137 | GALNT5 (-10810), GPD2 (+811347)       |
| chr19 | 17633631  | 17634882  | FAM129C (+147)                        |
| chr1  | 120229591 | 120230092 | ZNF697 (-39446), PHGDH (-24668)       |
| chr2  | 28310132  | 28310633  | FOSL2 (-305342), RBKS (-196418)       |

|       |           |           |                                            |
|-------|-----------|-----------|--------------------------------------------|
| chr1  | 116322923 | 116326671 | CASQ2 (-13395), NHLH2 (+61741)             |
| chr1  | 76719409  | 76719910  | ST6GALNAC5 (-613466), ST6GALNAC3 (+179256) |
| chr17 | 60972771  | 60973272  | TANC2 (-113895), MARCH10 (-87327)          |
| chr10 | 31434783  | 31437061  | ZEB1 (-172179), ZNF438 (-115056)           |
| chr8  | 104359070 | 104361830 | CTHRC1 (-23293), FZD6 (+49391)             |
| chr11 | 131942315 | 131942965 | NTM (+161284), OPCML (+870926)             |
| chr6  | 17993088  | 17993589  | KIF13A (-5539), NHLRC1 (+129512)           |
| chr18 | 10373465  | 10382570  | APCDD1 (-76607), VAPA (+463959)            |
| chr8  | 70544809  | 70545310  | SULF1 (+166201), SLC05A1 (+202239)         |
| chr20 | 11188350  | 11189017  | JAG1 (-533990)                             |
| chr7  | 17712942  | 17714919  | SNX13 (+266186), AHR (+375685)             |
| chr12 | 106051377 | 106054853 | APPL2 (-423254), NUAK1 (+480696)           |
| chr3  | 184166101 | 184166602 | EPHB3 (-113220), CHR1 (+68491)             |
| chr7  | 101360168 | 101362939 | CUX1 (-97737), MYL10 (-88978)              |
| chr15 | 39542764  | 39544006  | RASGRP1 (-686378), THBS1 (-329909)         |
| chr3  | 146687296 | 146689220 | PLSCR1 (-425607), ZIC4 (+433813)           |
| chr2  | 238185746 | 238190225 | COL6A3 (+135032), COPS8 (+194031)          |
| chr8  | 49814862  | 49817402  | EFCAB1 (-168341), SNAI2 (+18167)           |
| chr17 | 42611306  | 42611969  | GPATCH8 (-30869), FZD2 (-23287)            |
| chr6  | 52912771  | 52913981  | GSTA4 (-53200), ICK (+13224)               |
| chr1  | 205270555 | 205271345 | NUAK2 (+19933), TMCC2 (+73646)             |
| chr16 | 57927204  | 57928407  | KIFC3 (-91306), CNGB1 (+77210)             |
| chr17 | 42633106  | 42636593  | FZD2 (-75)                                 |
| chr18 | 10054660  | 10063080  | APCDD1 (-395755), VAPA (+144811)           |
| chr5  | 167231309 | 167231810 | WWC1 (-487595), TENM2 (+519756)            |
| chr7  | 121384728 | 121385369 | FAM3C (-348661), PTPRZ1 (-128094)          |
| chr17 | 57843480  | 57846396  | VMP1 (+60112), TUBD1 (+125358)             |
| chr5  | 178803914 | 178807478 | RUFY1 (-171863), ADAMTS2 (-33265)          |
| chr15 | 59268256  | 59268757  | SLTM (-42655), RNF111 (-11644)             |
| chr8  | 37350385  | 37351396  | ZNF703 (-202378), KCNU1 (+708999)          |
| chr11 | 131630527 | 131631028 | SNX19 (-844374), NTM (-150578)             |
| chr9  | 117038330 | 117039022 | ORM1 (-46660), COL27A1 (+120836)           |
| chr2  | 177284106 | 177284607 | HNRNPA3 (-792934), MTX2 (+150210)          |
| chr17 | 29281410  | 29282254  | RNF135 (-15387), ADAP2 (+33134)            |
| chr13 | 37737090  | 37737591  | CSNK1A1L (-57538), POSTN (+435640)         |
| chr1  | 172352055 | 172352739 | PIGC (+60829), DNM3 (+541776)              |
| chr9  | 92445425  | 92446207  | GADD45G (+225888), DIRAS2 (+959570)        |
| chr13 | 98039445  | 98040097  | RAP2A (-46705), MBNL2 (+165162)            |
| chr13 | 42187143  | 42190291  | RGCC (+157022), VWAS (+346503)             |
| chr12 | 91643816  | 91646331  | DCN (-68174), BTG1 (+894599)               |
| chr8  | 103379685 | 103381394 | RRM2B (-129194), UBR5 (+44529)             |
| chr3  | 152338571 | 152339072 | TMEM14E (-280043), P2RY1 (-213914)         |
| chr11 | 71655546  | 71656513  | IL18BP (-54079), RNF121 (+16283)           |
| chr17 | 20110363  | 20110864  | SPECC1 (+120279), LGALS9B (+260234)        |
| chr16 | 73186939  | 73187626  | ZFX3 (-105009)                             |
| chrX  | 133683067 | 133685735 | HPRT1 (+90218), PLAC1 (+108112)            |
| chr1  | 17515857  | 17517367  | PADI2 (-70682), PADI1 (-15009)             |
| chr7  | 141372653 | 141375365 | WEE2 (-34144), AGK (+123020)               |
| chr1  | 198743665 | 198748236 | PTPRC (+137781)                            |
| chr7  | 101765611 | 101766112 | SH2B2 (-162543), CUX1 (+306571)            |
| chr5  | 134725167 | 134729798 | PITX1 (-357495), H2AFY (+7829)             |
| chr1  | 153362961 | 153363462 | S100A8 (+452)                              |
| chr3  | 154796464 | 154798329 | MME (-39)                                  |
| chr2  | 239432174 | 239432675 | TWIST2 (-324248), ASB1 (+96960)            |
| chr2  | 235149888 | 235150660 | SPP2 (+190931), ARL4C (+255423)            |
| chr12 | 52213711  | 52214702  | ANKRD33 (-67537), SCN8A (+229187)          |

|       |           |           |                                        |
|-------|-----------|-----------|----------------------------------------|
| chr18 | 10238320  | 10241369  | APCDD1 (-214780), VAPA (+325786)       |
| chr5  | 178803841 | 178805854 | RUFY1 (-172711), ADAMTS2 (-32417)      |
| chr4  | 77674420  | 77676497  | SEPT11 (-195397), SHROOM3 (+319206)    |
| chr5  | 39525932  | 39528122  | DAB2 (-101755)                         |
| chr14 | 56800026  | 56801184  | TMEM260 (-245906), PELI2 (+215512)     |
| chr8  | 23033825  | 23035586  | TNFRSF10D (-13163), TNFRSF10A (+47933) |
| chr3  | 46132438  | 46132939  | XCR1 (-63455), CCR1 (+117198)          |
| chr15 | 38335209  | 38335857  | SPRED1 (-208994), TMC05A (+108075)     |
| chr18 | 10039980  | 10040990  | APCDD1 (-414140), VAPA (+126426)       |
| chr2  | 187213507 | 187214176 | ZC3H15 (-137041), FSIP2 (+610487)      |
| chr11 | 128774568 | 128776188 | C11orf45 (+214)                        |
| chr6  | 22827631  | 22829470  | PRL (-530821)                          |
| chr17 | 8826124   | 8826625   | PIK3R6 (-55381), PIK3R5 (+42649)       |
| chr11 | 106268993 | 106269849 | AASDHPPT (+321205), GUCY1A2 (+619750)  |
| chr2  | 238005870 | 238006502 | COPS8 (+12231), COL6A3 (+316832)       |
| chr11 | 131941297 | 131941798 | NTM (+160192), OPCML (+872018)         |
| chr9  | 20319297  | 20319798  | SLC24A2 (-532622), MLLT3 (+302994)     |
| chr6  | 22364260  | 22364761  | PRL (-66781)                           |
| chr18 | 56451600  | 56453759  | ZNF532 (-77152), MALT1 (+114062)       |
| chr2  | 225746389 | 225747066 | CUL3 (-296663), DOCK10 (+160431)       |
| chr12 | 106050759 | 106055392 | APPL2 (-423215), NUAK1 (+480735)       |
| chr1  | 15585845  | 15586476  | EFHD2 (-150230), TMEM51 (+107133)      |
| chr2  | 221988780 | 221989409 | EPHA4 (+447915)                        |
| chr14 | 93252289  | 93252790  | LGMM (-37516), GOLGA5 (-8036)          |
| chr15 | 33131115  | 33131616  | GREM1 (+121191), FMN1 (+228719)        |
| chr6  | 170714733 | 170715415 | FAM120B (+99230), PSMB1 (+147355)      |
| chr7  | 40854630  | 40855131  | C7orf10 (+680306), INHBA (+887825)     |
| chr17 | 60690891  | 60691392  | MRC2 (-13620), TLK2 (+134756)          |
| chr14 | 99500937  | 99503750  | BCL11B (+235221)                       |
| chr10 | 77371476  | 77371977  | ZNF503 (-210063), C10orf11 (-170792)   |
| chr17 | 48254028  | 48257361  | SGCA (+12329), COL1A1 (+23298)         |
| chr6  | 22366880  | 22367513  | PRL (-69467)                           |
| chr16 | 22703006  | 22707618  | HS3ST2 (-120186), NPIP5 (+180468)      |
| chr13 | 24079205  | 24079706  | TNFRSF19 (-74043), SACS (-71615)       |
| chr2  | 238121651 | 238123742 | COPS8 (+128742), COL6A3 (+200321)      |
| chr13 | 50202629  | 50203130  | ARL11 (+445)                           |
| chr2  | 238107285 | 238112579 | COPS8 (+115977), COL6A3 (+213086)      |
| chr17 | 53511169  | 53511670  | MMD (-12067), TMEM100 (+298062)        |
| chr10 | 61321536  | 61322037  | SLC16A9 (+148050), PHYHIPL (+385437)   |
| chr2  | 131669132 | 131670244 | ARHGEF4 (-4536)                        |
| chr12 | 6250856   | 6251507   | CD9 (-57699), VWF (-17341)             |
| chr12 | 7651931   | 7652704   | CD163L1 (-55537), CD163 (+4171)        |
| chr17 | 46623874  | 46626298  | HOXB2 (-1645)                          |
| chr11 | 86226317  | 86227839  | ME3 (+156600), C11orf73 (+213813)      |
| chr15 | 58809495  | 58810227  | LIPC (+107093), ADAM10 (+232316)       |
| chr3  | 101848561 | 101850015 | ZPLD1 (-304571), NFKBIZ (+280930)      |
| chr2  | 158101284 | 158104499 | GALNT5 (-11218), GPD2 (+810939)        |
| chr12 | 7708836   | 7709337   | CD163 (-52598), APOBEC1 (+109402)      |
| chr20 | 55606310  | 55606811  | BMP7 (+235123), TFAP2C (+402203)       |
| chr5  | 92544633  | 92545559  | NR2F1 (-373947)                        |
| chr10 | 77228405  | 77229677  | C10orf11 (-313478), ZNF503 (-67377)    |
| chr18 | 20882643  | 20884044  | TMEM241 (+134525), CABLES1 (+167617)   |
| chr17 | 10459523  | 10460316  | MYH2 (-6646), MYH3 (+100706)           |
| chr6  | 166671273 | 166674468 | T (-90764), SFT2D1 (+83208)            |
| chr2  | 192301384 | 192302486 | NABP1 (-241323), MYO1B (+191820)       |
| chr17 | 57868993  | 57870799  | VMP1 (+85070), TUBD1 (+100400)         |

|       |           |           |                                            |
|-------|-----------|-----------|--------------------------------------------|
| chr8  | 86847643  | 86848144  | REXO1L10P (-89149), PSKH2 (+234032)        |
| chr2  | 238190976 | 238191775 | COL6A3 (+131642), COPS8 (+197421)          |
| chr1  | 178029353 | 178030212 | SEC16B (-90733), RASAL2 (-33493)           |
| chr1  | 175097617 | 175101372 | TNN (+62501), TNR (+613411)                |
| chr1  | 213500387 | 213501393 | PROX1 (-660396), RPS6KC1 (+276293)         |
| chr4  | 160100485 | 160101376 | RAPGEF2 (-87958), FNIP2 (+410641)          |
| chr18 | 10518164  | 10520329  | NAPG (-6784), APCDD1 (+64622)              |
| chr12 | 58813321  | 58813953  | XRCC6BP1 (+478277), LRIG3 (+500666)        |
| chr1  | 222216726 | 222217227 | DUSP10 (-301459), HHIPL2 (+504468)         |
| chr4  | 90390958  | 90391459  | TIGD2 (+357241), SNCA (+367081)            |
| chr17 | 59363638  | 59364268  | TBX2 (-113304), BCAS3 (+608703)            |
| chr12 | 66334825  | 66335326  | HMGA2 (+117165), ENSG00000228144 (+228689) |
| chr7  | 81475204  | 81475705  | HGF (-75941), CACNA2D1 (+597659)           |
| chr11 | 59950011  | 59950659  | MS4A6A (+361)                              |
| chr18 | 42914965  | 42915466  | SLC14A2 (-279550), SETBP1 (+654353)        |
| chr15 | 51494500  | 51496031  | CYP19A1 (+135541), AP4E1 (+294396)         |
| chr18 | 10111655  | 10112156  | APCDD1 (-342719), VAPA (+197847)           |
| chr15 | 39524085  | 39525187  | RASGRP1 (-667629), THBS1 (-348658)         |
| chr19 | 46701926  | 46703020  | IGFL1 (-30536), IGFL2 (+51434)             |
| chr18 | 10284719  | 10287742  | APCDD1 (-168394), VAPA (+372172)           |
| chr3  | 121713967 | 121714815 | ILDR1 (+26660), SLC15A2 (+101455)          |
| chr5  | 167246314 | 167249461 | WWC1 (-471267), TENM2 (+536084)            |
| chr2  | 219196712 | 219198018 | SLC11A1 (-49387), TM6IM1 (-45793)          |
| chr17 | 42664338  | 42664839  | DBF4B (-121462), FZD2 (+29664)             |
| chr12 | 66218164  | 66219928  | HMGA2 (+1135), ENSG00000228144 (+344719)   |
| chr6  | 112305415 | 112308866 | FYN (-112486), WISP3 (-68321)              |
| chr7  | 26140487  | 26141831  | NPVF (-873054), NFE2L3 (-50701)            |
| chr5  | 36657337  | 36659050  | NIPBL (-218667), SLC1A3 (+51737)           |
| chr10 | 63511205  | 63511875  | TMEM26 (-298332), ARID5B (-149519)         |
| chr6  | 136356164 | 136359921 | PDE7B (+185209), MTFR2 (+213406)           |
| chr3  | 30619390  | 30619891  | TGFBR2 (-28452)                            |
| chr12 | 71975436  | 71975937  | TSPAN8 (-140009), THAP2 (-81102)           |
| chr5  | 142440820 | 142441877 | ARHGAP26 (+291400), NR3C1 (+341905)        |
| chr16 | 3136629   | 3138644   | ZSCAN10 (+5224), IL32 (+22252)             |
| chr9  | 92480144  | 92480645  | GADD45G (+260467), DIRAS2 (+924991)        |
| chr13 | 20933870  | 20934598  | GJB6 (-127700), CRYL1 (+165762)            |
| chr9  | 75094211  | 75094712  | ZFAND5 (-114299), TMC1 (-42255)            |
| chr8  | 145992315 | 145994292 | ZNF251 (-12314), ZNF34 (+19385)            |
| chr3  | 64328654  | 64331836  | PRICKLE2 (-119114), ADAMTS9 (+343431)      |
| chrX  | 133682010 | 133686284 | HPRT1 (+89964), PLAC1 (+108366)            |
| chr1  | 112972762 | 112973833 | WNT2B (-78102), CTTNBP2NL (+34495)         |
| chr10 | 85930963  | 85931656  | C10orf99 (-2184)                           |
| chr17 | 29282863  | 29284574  | RNF135 (-13500), ADAP2 (+35021)            |
| chr6  | 12585457  | 12586436  | PHACTR1 (-132595), EDN1 (+295351)          |
| chr1  | 9503831   | 9504462   | SLC25A33 (-95394), SPSB1 (+151208)         |
| chr1  | 60208064  | 60211162  | HOOK1 (-70920), FGGY (+446960)             |
| chr6  | 17992814  | 17994895  | KIF13A (-6055), NHLRC1 (+128996)           |
| chr12 | 105955550 | 105956051 | APPL2 (-325940), NUAK1 (+578010)           |
| chr20 | 46557114  | 46557806  | SULF2 (-142130), PREX1 (+886960)           |
| chr7  | 25010336  | 25012284  | DFNA5 (-213578), OSBPL3 (+8497)            |
| chr7  | 16955728  | 16956229  | AHR (-382267), AGR3 (-34368)               |
| chr19 | 51644984  | 51645485  | SIGLEC7 (-323)                             |
| chr12 | 106387484 | 106387985 | APPL2 (-757874), NUAK1 (+146076)           |
| chr1  | 154883675 | 154884176 | KCNN3 (-41170), PMVK (+25541)              |
| chr2  | 208656841 | 208657672 | FZD5 (-22970), PLEKHM3 (+233027)           |
| chr11 | 36171511  | 36172012  | PRR5L (-225793), LDLRAD3 (+206134)         |

|       |           |           |                                          |
|-------|-----------|-----------|------------------------------------------|
| chr6  | 119089338 | 119089839 | ASF1A (-125795), CEP85L (-58351)         |
| chr3  | 101875467 | 101875968 | ZPLD1 (-278141), NFKBIZ (+307360)        |
| chr14 | 76076973  | 76077474  | FLVCR2 (+32264), C14orf1 (+50308)        |
| chr6  | 136316087 | 136316738 | PDE7B (+143579), MTFR2 (+255036)         |
| chr12 | 66216786  | 66221574  | HMGA2 (+1269), ENSG00000228144 (+344585) |
| chr5  | 17105520  | 17106021  | MYO10 (-169399), BASP1 (-111898)         |
| chr7  | 107639193 | 107639694 | LAMB1 (+4256), DLD (+108029)             |
| chr15 | 22486693  | 22492501  | TUBGCP5 (-343798), OR4N4 (+107215)       |
| chr10 | 123092432 | 123092933 | FGFR2 (+265234), WDR11 (+481996)         |
| chr5  | 53685279  | 53685780  | ARL15 (-79127), HSPB3 (-65915)           |
| chr3  | 77873944  | 77874445  | NONE                                     |
| chr13 | 20998258  | 21000635  | GJB6 (-192913), CRYL1 (+100549)          |
| chr1  | 213498316 | 213502375 | PROX1 (-660940), RPS6KC1 (+275749)       |
| chr7  | 101585615 | 101586116 | SH2B2 (-342539), CUX1 (+126575)          |
| chr13 | 24313311  | 24313812  | MIPEP (+149996), TNFRSF19 (+160063)      |
| chr20 | 46537883  | 46538726  | SULF2 (-122975), PREX1 (+906115)         |
| chr11 | 95328932  | 95329433  | SESN3 (-364822), FAM76B (+193772)        |
| chr7  | 119057    | 120063    | FAM20C (-73409)                          |
| chr7  | 118259    | 120488    | FAM20C (-73595)                          |
| chr17 | 28994557  | 28995198  | TBC1D29 (+110748), CRLF3 (+156916)       |
| chr12 | 125353132 | 125353859 | SCARB1 (-5103), UBC (+46398)             |
| chr5  | 2685961   | 2686462   | IRX4 (-798880), IRX2 (+65564)            |
| chr20 | 55575121  | 55575622  | BMP7 (+266312), TFAP2C (+371014)         |
| chr13 | 24146375  | 24146876  | SACS (-138785), TNFRSF19 (-6873)         |
| chr1  | 60217881  | 60218838  | HOOK1 (-62173), FGGY (+455707)           |
| chr12 | 106313473 | 106313974 | APPL2 (-683863), NUAK1 (+220087)         |
| chr7  | 27032577  | 27033248  | SKAP2 (-128551), HOXA1 (+102680)         |
| chr11 | 56980861  | 56982154  | APLNR (+23167), LRRCS5 (+32287)          |
| chr4  | 38083751  | 38084419  | KLF3 (-581732), PTTG2 (+122029)          |
| chr6  | 136333212 | 136333713 | PDE7B (+160629), MTFR2 (+237986)         |
| chr9  | 132107877 | 132108378 | NTMT1 (-263035), PPP2R4 (+234531)        |
| chr18 | 13499941  | 13503050  | FAM210A (+225063), LDLRAD4 (+282710)     |
| chr1  | 181069125 | 181071205 | CACNA1E (-382716), MR1 (+67026)          |
| chr12 | 27695548  | 27696049  | REP15 (-153629), PPFIBP1 (+18660)        |
| chr3  | 64325254  | 64333181  | PRICKLE2 (-118087), ADAMTS9 (+344458)    |
| chr9  | 116360783 | 116361284 | ZNF618 (-277528), RGS3 (+154023)         |
| chr3  | 10973967  | 10979867  | SLC6A1 (-57493), SLC6A11 (+119032)       |
| chr6  | 7331459   | 7333595   | RIOK1 (-57202), SSR1 (-19087)            |
| chr12 | 6254519   | 6255150   | CD9 (-54046), VWF (-20994)               |
| chr4  | 169724428 | 169724929 | CBR4 (+206730), PALLD (+306424)          |
| chr18 | 13499353  | 13505121  | FAM210A (+224322), LDLRAD4 (+283451)     |
| chr12 | 1921087   | 1921588   | LRTM2 (-8095), ADIPOR2 (+121145)         |
| chr1  | 213498848 | 213499482 | PROX1 (-662121), RPS6KC1 (+274568)       |
| chr13 | 20805118  | 20807228  | GJB6 (+361)                              |
| chr1  | 152421125 | 152421883 | LCE5A (-61816), CRNN (-34765)            |
| chr13 | 42184166  | 42185884  | RGCC (+153330), VWA8 (+350195)           |
| chr3  | 185435031 | 185436236 | IGF2BP2 (+107210), SENP2 (+131672)       |
| chr2  | 172959404 | 172960250 | DLX2 (+7801), DLX1 (+9873)               |
| chr3  | 40086424  | 40086925  | EIF1B (-264500), MYRIP (+235579)         |
| chr12 | 66025649  | 66026830  | HMGA2 (-191671), MSRB3 (+353817)         |
| chr12 | 706954    | 707455    | NINJ2 (+65740), B4GALNT3 (+137675)       |
| chr17 | 48396106  | 48396878  | XYLT2 (-26961), TMEM92 (+47725)          |
| chr5  | 83677819  | 83680881  | HAPLN1 (-661918), EDIL3 (+1261)          |
| chr4  | 157695101 | 157695756 | CTSO (-820360), PDGFC (+197117)          |
| chr2  | 99441203  | 99441890  | MGAT4A (-93958), TSGA10 (+329833)        |
| chr9  | 16626940  | 16628949  | BNC2 (+242759)                           |

|       |           |           |                                    |
|-------|-----------|-----------|------------------------------------|
| chr6  | 139899086 | 139899587 | CITED2 (-203580)                   |
| chr1  | 223673370 | 223673871 | SUSD4 (-136220), CAPN8 (+179727)   |
| chr2  | 16080943  | 16081444  | MYCN (+508)                        |
| chr6  | 12354874  | 12355375  | PHACTR1 (-363417), EDN1 (+64529)   |
| chr17 | 39551277  | 39551778  | KRT34 (-12873), KRT31 (+2316)      |
| chr1  | 41949819  | 41950320  | EDN2 (+272)                        |
| chr12 | 59413757  | 59414857  | SLC16A7 (-668811), LRIG3 (-100004) |
| chr6  | 21664534  | 21665035  | SOX4 (+70813), PRL (+632945)       |
| chr17 | 46687509  | 46691114  | HOXB7 (-933)                       |
| chr7  | 430806    | 432275    | PDGFA (+127490), FAM20C (+238572)  |

**Supplementary Table 1-2. BCC down-regulated H3K27ac peaks and their target genes**

**chrom:** chromosome in hg19

**start:** peak start position in hg19

**end:** peak end position in hg19

**target:** putative target gene(s) from GREAT analysis, gene (distance to the peak)

| BCC-downregulated H3K27ac peaks |           |           |                                          |
|---------------------------------|-----------|-----------|------------------------------------------|
| Chr                             | Start     | End       | Target                                   |
| chr19                           | 708232    | 710793    | PALM (+412)                              |
| chr14                           | 102025515 | 102026611 | DIO3 (-1625)                             |
| chr5                            | 146614123 | 146614782 | STK32A (-73)                             |
| chr1                            | 61508727  | 61509483  | C1orf87 (-969663), NFIA (-38429)         |
| chr7                            | 1506062   | 1507057   | MICALL2 (-7422), INTS1 (+37443)          |
| chr9                            | 87282833  | 87287560  | NTRK2 (+1731)                            |
| chr8                            | 12808716  | 12810028  | KIAA1456 (+6186), DLC1 (+563023)         |
| chr6                            | 157557065 | 157558357 | TMEM242 (+186922), ARID1B (+458648)      |
| chr12                           | 131531476 | 131533762 | SFSWAP (-663063), GPR133 (+94167)        |
| chr11                           | 130747932 | 130748433 | SNX19 (+38221), C11orf44 (+205332)       |
| chr3                            | 173115182 | 173116085 | NLGN1 (-604)                             |
| chr2                            | 191044786 | 191046363 | C2orf88 (-14)                            |
| chr17                           | 15689240  | 15690065  | ADORA2B (-158578), TBC1D26 (+54062)      |
| chrX                            | 47060199  | 47060700  | INE1 (-3870)                             |
| chr16                           | 49872691  | 49873192  | CNEP1R1 (-185379), ZNF423 (-16292)       |
| chr17                           | 41984314  | 41984815  | MPP2 (+548)                              |
| chr20                           | 2672779   | 2673280   | EBF4 (-494)                              |
| chr21                           | 36041566  | 36044059  | CLIC6 (+1125), RUNX1 (+378828)           |
| chr9                            | 87282403  | 87288187  | NTRK2 (+1829)                            |
| chr14                           | 69726401  | 69729556  | GALNT16 (+1298), ERH (+137365)           |
| chr2                            | 211089455 | 211090133 | ACADL (+421)                             |
| chr17                           | 15689175  | 15690371  | ADORA2B (-158458), TBC1D26 (+54182)      |
| chr2                            | 96050796  | 96051423  | FAHD2A (-17364), KCNIP3 (+88058)         |
| chr3                            | 126074972 | 126075985 | KLF15 (+806)                             |
| chr14                           | 101999292 | 102002832 | DIO3 (-26626), ENSG00000269375 (+641797) |
| chr5                            | 146613374 | 146615111 | STK32A (-283)                            |
| chr11                           | 1580088   | 1580589   | MOB2 (-72363), DUSP8 (+12811)            |
| chr11                           | 63258417  | 63258918  | HRASLS5 (-2)                             |
| chr12                           | 131753109 | 131753610 | SFSWAP (-442322), GPR133 (+314908)       |
| chr10                           | 118030073 | 118033924 | GFRA1 (+980)                             |
| chr20                           | 43374290  | 43374931  | KCNK15 (+190)                            |
| chr8                            | 12808274  | 12810745  | KIAA1456 (+6324), DLC1 (+562885)         |
| chr11                           | 65373899  | 65374400  | KCNK7 (-10683), MAP3K11 (+7563)          |
| chr8                            | 91996841  | 91998100  | TMEM55A (+55821), NECAB1 (+193693)       |
| chr9                            | 34589094  | 34590706  | CNTFR (-165)                             |
| chr2                            | 287500    | 290082    | FAM150B (-495)                           |
| chr22                           | 46422501  | 46423961  | PPARA (-123268), WNT7B (-50222)          |
| chr2                            | 237562939 | 237563440 | COPS8 (-430765), ACKR3 (+84906)          |
| chr12                           | 54772184  | 54773868  | GPR84 (-14755), ZNF385A (+12056)         |
| chr20                           | 62323261  | 62324016  | TNFRSF6B (-4382)                         |
| chr5                            | 1539209   | 1541447   | LPCAT1 (-16236), MRPL36 (+259681)        |
| chr1                            | 162517942 | 162519332 | UAP1 (-12686), UHMK1 (+51004)            |
| chr20                           | 4021682   | 4022394   | SMOX (-107388), RNF24 (-25822)           |
| chr1                            | 11846815  | 11852883  | MTHFR (+13453), AGTRAP (+53637)          |
| chr21                           | 36040841  | 36044634  | CLIC6 (+1050), RUNX1 (+378903)           |
| chr12                           | 52442584  | 52452944  | C12orf44 (-15991), NR4A1 (+31148)        |
| chr19                           | 847632    | 849064    | ELANE (-2666)                            |
| chr12                           | 54768810  | 54771452  | GPR84 (-11860), ZNF385A (+14951)         |

|       |           |           |                                          |
|-------|-----------|-----------|------------------------------------------|
| chr16 | 1428687   | 1429726   | GNPTG (+27283), UNKL (+35485)            |
| chr17 | 19482632  | 19483329  | ALDH3A2 (-69083), SLC47A1 (+45814)       |
| chr14 | 104015399 | 104019617 | BAG5 (+11127), TRMT61A (+21987)          |
| chr12 | 52429240  | 52431973  | C12orf44 (-33148), NR4A1 (+13991)        |
| chr9  | 129873203 | 129874722 | ANGPTL2 (+11199), RALGPS1 (+196910)      |
| chr12 | 52455865  | 52457011  | C12orf44 (-7317), NR4A1 (+39822)         |
| chr14 | 103985731 | 103989036 | CKB (+2064), MARK3 (+135527)             |
| chr3  | 173112820 | 173113756 | NLGN1 (-2950)                            |
| chr12 | 131529378 | 131536009 | SFSWAP (-662988), GPR133 (+94242)        |
| chr12 | 52448335  | 52448836  | C12orf44 (-15169), NR4A1 (+31970)        |
| chr15 | 86315394  | 86316189  | KLHL25 (+22469), AKAP13 (+391832)        |
| chr6  | 119399234 | 119400558 | FAM184A (+12)                            |
| chr5  | 7802312   | 7802813   | FASTKD3 (+66552), ADCY2 (+406242)        |
| chr12 | 95942143  | 95942785  | USP44 (+2802), METAP2 (+74737)           |
| chr1  | 6347807   | 6349048   | GPR153 (-27393), ACOT7 (+97445)          |
| chr6  | 157555978 | 157559161 | TMEM242 (+187063), ARID1B (+458507)      |
| chr9  | 99380084  | 99382622  | CDC14B (+759)                            |
| chr2  | 286811    | 290447    | FAM150B (-333)                           |
| chr10 | 733628    | 735598    | DIP2C (+993)                             |
| chr1  | 196577149 | 196578679 | KCNT2 (-415)                             |
| chr2  | 71205525  | 71206313  | TEX261 (+16156), ATP6V1B1 (+42907)       |
| chr6  | 32013958  | 32015421  | TNXB (-785)                              |
| chr19 | 41192804  | 41193482  | NUMBL (+3413), LTBP4 (+90002)            |
| chr17 | 11501842  | 11502343  | DNAH9 (+345)                             |
| chr10 | 115406275 | 115406776 | NRAP (+17360), HABP2 (+93741)            |
| chr6  | 132331969 | 132332792 | CTGF (-59868), MOXD1 (+390303)           |
| chr7  | 30173828  | 30177090  | ZNRF2 (-148464), PLEKHA8 (+107430)       |
| chr8  | 101524951 | 101525687 | RNF19A (-209832), ANKRD46 (+46651)       |
| chr4  | 5206860   | 5207361   | C4orf6 (-319772), STK32B (+153942)       |
| chr7  | 1505231   | 1509462   | MICALL2 (-8209), INTS1 (+36656)          |
| chr22 | 48885798  | 48886299  | FAM19A5 (+777)                           |
| chr10 | 118029350 | 118034722 | GFRA1 (+943)                             |
| chr14 | 101997409 | 102003199 | DIO3 (-27384), ENSG00000269375 (+641039) |
| chr10 | 92921739  | 92923944  | ANKRD1 (-241809), PCGF5 (-57703)         |
| chr9  | 71939175  | 71940311  | FAM189A2 (-4498)                         |
| chr15 | 68876944  | 68877597  | CORO2B (+5698), ANP32A (+235963)         |
| chr22 | 38378955  | 38380851  | SOX10 (+641)                             |
| chr11 | 130479170 | 130480391 | C11orf44 (-63070), ADAMTS15 (+160912)    |
| chr20 | 48363745  | 48365168  | SLC9A8 (-64793), B4GALT5 (-34042)        |
| chr2  | 211089156 | 211090713 | ACADL (+280)                             |
| chr18 | 48085850  | 48086351  | MAPK4 (-347)                             |
| chr11 | 43963597  | 43965719  | ACCSL (-104873), ALKBH3 (+62269)         |
| chr6  | 17280880  | 17282537  | RBM24 (+132)                             |
| chr21 | 38352773  | 38353439  | RIPPLY3 (-25757), HLCS (-14333)          |
| chr1  | 3418740   | 3419241   | ARHGEF16 (+48001), MEGF6 (+109068)       |
| chr19 | 15890289  | 15890790  | OR10H5 (-14221), OR10H3 (+38337)         |
| chr14 | 104189371 | 104190717 | ZFYVE21 (+7977), PPP1R13B (+123883)      |
| chr18 | 45554194  | 45555102  | SMAD2 (-97136), ZBTB7C (+137289)         |
| chr7  | 103630282 | 103630783 | RELN (-570)                              |
| chr19 | 32619263  | 32619902  | TSHZ3 (-779130), ZNF507 (-216917)        |
| chr19 | 16507662  | 16513215  | EPS15L1 (+72384), KLF2 (+74811)          |
| chr2  | 120063360 | 120064727 | DBI (-60785), STEAP3 (+82637)            |
| chr6  | 149210545 | 149211046 | TAB2 (-431392), UST (+142332)            |
| chr11 | 125034838 | 125035497 | PKNOX2 (+566)                            |
| chr16 | 71756732  | 71758108  | PHLPP2 (+1184), MARVELD3 (+97330)        |
| chr9  | 22447265  | 22447959  | DMRTA1 (+772)                            |



|       |           |           |                                       |
|-------|-----------|-----------|---------------------------------------|
| chrX  | 150863626 | 150864127 | PRRG3 (-2902)                         |
| chr19 | 3535995   | 3538018   | FZR1 (+14019), MFSD12 (+20394)        |
| chr11 | 130476305 | 130477000 | C11orf44 (-66198), ADAMTS15 (+157784) |
| chr11 | 8039715   | 8041984   | TUB (-19330), EIF3F (+49052)          |
| chr16 | 15489396  | 15490447  | MPV17L (+286), ENSG00000261130 (+311) |
| chr17 | 36897960  | 36899099  | PCGF2 (+7540), CISD3 (+12042)         |
| chr9  | 71939266  | 71941455  | FAM189A2 (-3880)                      |
| chr21 | 45344960  | 45345461  | AGPAT3 (+322)                         |
| chr1  | 6351266   | 6352674   | GPR153 (-30935), ACOT7 (+93903)       |
| chr1  | 61519137  | 61520656  | C1orf87 (-980455), NFIA (-27637)      |
| chr12 | 131404347 | 131406170 | GPR133 (-33193), RAN (+48835)         |
| chr22 | 34535561  | 34536062  | ISX (-926317), LARGE (-219403)        |
| chr19 | 41105701  | 41106337  | LTBP4 (+2878), NUMBL (+90537)         |
| chr2  | 237795340 | 237795841 | COPS8 (-198364), ACKR3 (+317307)      |
| chr14 | 92350380  | 92352806  | TC2N (-17720), FBLN5 (+62574)         |
| chr10 | 134227374 | 134227875 | INPP5A (-123699), STK32C (-106181)    |
| chr6  | 35036313  | 35036814  | TCP11 (+72860), ANKS1A (+179522)      |
| chr9  | 34591215  | 34591927  | CNTFR (-1836)                         |
| chr8  | 101521121 | 101522614 | RNF19A (-206381), ANKRD46 (+50102)    |
| chr6  | 90142822  | 90143323  | ANKRD6 (-129047), RRAGD (-21084)      |
| chr21 | 45356335  | 45357419  | TRAPPC10 (-75323), AGPAT3 (+11988)    |
| chr19 | 32616501  | 32617149  | TSHZ3 (-776372), ZNF507 (-219675)     |
| chr1  | 6346934   | 6353066   | GPR153 (-28965), ACOT7 (+95873)       |
| chr14 | 22806466  | 22807519  | DAD1 (+251182), OR4E2 (+673696)       |
| chr9  | 129860781 | 129861553 | ANGPTL2 (+23995), RALGPS1 (+184114)   |
| chr3  | 142607249 | 142608617 | PCOLCE2 (+112)                        |
| chr3  | 190580362 | 190581201 | GMNC (-378)                           |
| chr14 | 103668487 | 103668988 | EIF5 (-131601), TNFAIP2 (+78940)      |
| chr11 | 100997614 | 100998910 | PGR (+2993), TMEM133 (+135451)        |
| chr8  | 101170220 | 101170865 | SPAG1 (-113)                          |
| chr9  | 34592997  | 34594364  | CNTFR (-3946)                         |
| chr6  | 36888841  | 36889342  | PI16 (-33117), C6orf89 (+35452)       |
| chr19 | 32620610  | 32621242  | TSHZ3 (-780473), ZNF507 (-215574)     |
| chr2  | 169048243 | 169048744 | STK39 (+56157), B3GALT1 (+373312)     |
| chr1  | 88928424  | 88928925  | PKN2 (-221230)                        |

**Supplementary Table 1-3. SCC up-regulated H3K27ac peaks and their target genes**

**chrom:** chromosome in hg19

**start:** peak start position in hg19

**end:** peak end position in hg19

**target:** putative target gene(s) from GREAT analysis, gene (distance to the peak)

| SCC-upregulated H3K27ac peaks |           |           |                                     |
|-------------------------------|-----------|-----------|-------------------------------------|
| Chr                           | Start     | End       | Target                              |
| chr12                         | 104871481 | 104873181 | CHST11 (+21580), SLC41A2 (+450102)  |
| chr15                         | 22448341  | 22449034  | TUBGCP5 (-384707), OR4N4 (+66306)   |
| chr11                         | 104575424 | 104576662 | PDGFD (-541208), CASP12 (+193117)   |
| chr7                          | 3132233   | 3132734   | SDK1 (-208596), CARD11 (-48905)     |
| chr20                         | 19537456  | 19537957  | RIN2 (-329458), SLC24A3 (+344417)   |
| chr7                          | 40346540  | 40347041  | C7orf10 (+172216)                   |
| chr5                          | 86417337  | 86417838  | RASA1 (-146117), COX7C (+503815)    |
| chr2                          | 197127182 | 197127994 | STK17B (-91289), HECW2 (+329747)    |
| chr22                         | 19878420  | 19880541  | COMT (-49649), GNB1L (-37019)       |
| chr5                          | 39176978  | 39177706  | RICTOR (-102832), FYB (+93417)      |
| chr14                         | 52641095  | 52645097  | NID2 (-107384), PTGDR (-91335)      |
| chr7                          | 134301645 | 134311920 | BPGM (-24800), AKR1B15 (+72895)     |
| chr22                         | 17699725  | 17700226  | CECR5 (-59809), CECR1 (+2903)       |
| chr1                          | 32354799  | 32355522  | SPOCD1 (-73509), PTP4A2 (+48827)    |
| chr5                          | 54390536  | 54394082  | GZMA (-6167), GZMK (+72228)         |
| chr8                          | 121743906 | 121744568 | SNTB1 (+81276), MTBP (+286571)      |
| chr9                          | 101819307 | 101822442 | TGFBR1 (-46496), COL15A1 (+114954)  |
| chr14                         | 106471359 | 106471994 | TMEM121 (+478737)                   |
| chr5                          | 169723413 | 169725687 | LCP2 (+681)                         |
| chr13                         | 94976055  | 94976832  | DCT (+155492)                       |
| chr3                          | 55519129  | 55522574  | LRTM1 (-558751), WNT5A (+3121)      |
| chr11                         | 128480585 | 128481620 | FLI1 (-82787), ETS1 (-23666)        |
| chr14                         | 91694341  | 91697117  | GPR68 (+24540), C14orf159 (+115015) |
| chr5                          | 54396774  | 54401600  | GZMA (+711)                         |
| chr13                         | 40351299  | 40351800  | COG6 (+121736), FOXO1 (+889184)     |
| chr3                          | 16342086  | 16342587  | OXNAD1 (+35631), RFTN1 (+212876)    |
| chr14                         | 22392341  | 22392842  | OR4E2 (+259295), DAD1 (+665583)     |
| chr12                         | 47670022  | 47671507  | AMIGO2 (-197117), RPAP3 (+429079)   |
| chr8                          | 134151205 | 134152602 | SLA (-79301), WISP1 (-51378)        |
| chr14                         | 98167745  | 98177409  | VRK1 (+908936)                      |
| chr1                          | 172668704 | 172669205 | FASLG (+40797), TNFSF18 (+351148)   |
| chr14                         | 98654900  | 98656903  | NONE                                |
| chr8                          | 37132080  | 37135061  | ZNF703 (-419698), KCNU1 (+491679)   |
| chr7                          | 50307013  | 50308538  | IKZF1 (-40542), C7orf72 (+172144)   |
| chr2                          | 189466055 | 189466682 | COL3A1 (-372677), GULP1 (+308810)   |
| chr17                         | 57841368  | 57842237  | VMP1 (+56977), TUBD1 (+128493)      |
| chr15                         | 38869767  | 38870268  | RASGRP1 (-13011)                    |
| chr1                          | 234907247 | 234909773 | IRF2BP2 (-163239), TOMM20 (+383741) |
| chr7                          | 8216108   | 8217698   | ICA1 (+85008), GLCCI1 (+208478)     |
| chr3                          | 33089191  | 33090459  | TMPPE (+48468), CCR4 (+96759)       |
| chr5                          | 54331679  | 54334698  | GZMA (-65287), GZMK (+13108)        |
| chr8                          | 134164132 | 134165796 | SLA (-92361), WISP1 (-38318)        |
| chr1                          | 86673393  | 86673894  | COL24A1 (-51198), ODF2L (+188301)   |
| chr4                          | 78506658  | 78510481  | CXCL13 (+75663), CNOT6L (+231974)   |
| chr21                         | 34303836  | 34305592  | C21orf62 (-124686), OLIG2 (-93529)  |
| chr9                          | 21558385  | 21560043  | MTAP (-243328), IFNE (-76902)       |
| chr16                         | 87928245  | 87931608  | SLC7A5 (-26833), CA5A (+40195)      |
| chr7                          | 45066503  | 45068093  | CCM2 (+673)                         |

|       |           |           |                                             |
|-------|-----------|-----------|---------------------------------------------|
| chr14 | 106966240 | 106968290 | TMEM121 (+974325)                           |
| chr12 | 103834217 | 103837671 | STAB2 (-145107), ASCL1 (+484480)            |
| chr17 | 46529104  | 46532858  | SKAP1 (-23429), HOXB1 (+77378)              |
| chr19 | 8634371   | 8636559   | ZNF414 (-56421), MYO1F (+6996)              |
| chr3  | 101236265 | 101241264 | TRMT10C (-41941), SENP7 (-6737)             |
| chr17 | 34222314  | 34229132  | CCL5 (-18211), RDM1 (+32054)                |
| chr20 | 31559015  | 31561109  | SUN5 (+32177), EFCAB8 (+113333)             |
| chr2  | 429126    | 431260    | FAM150B (-141897), TMEM18 (+247246)         |
| chr5  | 34498630  | 34500034  | C1QTNF3 (-455395), RAI14 (-185327)          |
| chr10 | 81082003  | 81082910  | PPIF (-24777), ZMIZ1 (+253665)              |
| chr6  | 30476909  | 30477781  | PRR3 (-47318), HLA-E (+20101)               |
| chr8  | 129587976 | 129589453 | TMEM75 (-628124)                            |
| chr2  | 85008136  | 85011569  | TRABD2A (+98516), DNAH6 (+266274)           |
| chr18 | 22236938  | 22237595  | HRH4 (+196674), ZNF521 (+694849)            |
| chr12 | 32079971  | 32083131  | BICD1 (-178612), H3F3C (-136376)            |
| chr6  | 169434925 | 169435907 | THBS2 (+218723), SMOC2 (+593585)            |
| chr3  | 170968355 | 170976961 | SLC2A2 (-228119), TNIK (+205539)            |
| chr1  | 117311168 | 117312092 | PTGFRN (-141049), CD2 (+14623)              |
| chr5  | 49928808  | 49932021  | EMB (-193214), PARP8 (-32357)               |
| chr11 | 89112637  | 89115967  | NOX4 (+110351), TYR (+203682)               |
| chr6  | 118877499 | 118881450 | PLN (+10014), CEP85L (+151763)              |
| chr2  | 231526038 | 231526900 | CAB39 (-51091), SP100 (+245488)             |
| chr17 | 37492466  | 37492967  | STAC2 (-110592), FBXL20 (+65199)            |
| chr2  | 158259438 | 158263971 | ERMN (-77480), CYTIP (+38949)               |
| chr17 | 57838144  | 57840866  | VMP1 (+54679), TUBD1 (+130791)              |
| chr1  | 209941066 | 209943913 | TRAF3IP3 (+10647), IRF6 (+36899)            |
| chr17 | 34202088  | 34208435  | CCL5 (+2250), TAF15 (+68803)                |
| chr8  | 126936883 | 126937544 | TRIB1 (+494651), FAM84B (+633424)           |
| chr10 | 30667435  | 30667936  | MAP3K8 (-55180), MTPAP (-29438)             |
| chr7  | 23578423  | 23580267  | CCDC126 (-57653), TRA2A (-7685)             |
| chr5  | 134769405 | 134770284 | H2AFY (-34533), C5orf20 (+13193)            |
| chr1  | 168503000 | 168506905 | XCL2 (+8282), TBX19 (+254675)               |
| chr16 | 81501996  | 81504508  | PLCG2 (-309611), CMIP (+24477)              |
| chr7  | 17624999  | 17625500  | AHR (+287004), SNX13 (+354867)              |
| chr2  | 132426825 | 132427790 | GPR39 (-746839), MZT2A (-177313)            |
| chr8  | 8202300   | 8205236   | ENSG00000182319 (+40240), ZNF705B (+402624) |
| chr5  | 1792884   | 1793557   | LPCAT1 (-269129), MRPL36 (+6788)            |
| chr17 | 30878085  | 30878782  | CDK5R1 (+64797), MYO1D (+325761)            |
| chr19 | 8641191   | 8642437   | MYO1F (+647)                                |
| chr7  | 7983055   | 7987003   | RPA3 (-226791), GLCC1 (-23396)              |
| chr9  | 137712411 | 137713104 | FCN2 (-59900), COL5A1 (+179138)             |
| chr6  | 130179922 | 130184224 | TMEM244 (+619)                              |
| chr12 | 68511732  | 68512233  | IFNG (+41544), DYRK2 (+469482)              |
| chr6  | 86379004  | 86379654  | SYNCRIP (-26326)                            |
| chr3  | 111029201 | 111031881 | CD96 (-230424), PVRL3 (+239951)             |
| chr2  | 217213440 | 217219774 | MARCH4 (+20143), XRCC5 (+244420)            |
| chr3  | 43518801  | 43519302  | ANO10 (+144508), SNRK (+191020)             |
| chr1  | 90222323  | 90224442  | LRRC8D (-63208), LRRC8C (+124752)           |
| chr3  | 59436642  | 59437482  | FAM3D (-784487)                             |
| chr12 | 22547298  | 22553209  | ST8SIA1 (-62606), C2CD5 (+147226)           |
| chr20 | 35669885  | 35673698  | SAMHD1 (-91546), RBL1 (+52606)              |
| chr15 | 70007043  | 70007544  | RPLP1 (+262171), TLE3 (+383221)             |
| chr1  | 117309203 | 117309704 | PTGFRN (-143225), CD2 (+12447)              |
| chr1  | 168389039 | 168393313 | XCL2 (+122059), TBX19 (+140898)             |
| chr20 | 1634944   | 1648716   | SIRPG (-3405)                               |
| chr12 | 32044158  | 32044659  | BICD1 (-215754), H3F3C (-99234)             |

|       |           |           |                                           |
|-------|-----------|-----------|-------------------------------------------|
| chr18 | 56324336  | 56326887  | ALPK2 (-29423), MALT1 (-13006)            |
| chr19 | 33284069  | 33287465  | TDRD12 (+74788), SLC7A9 (+74905)          |
| chr7  | 116645929 | 116646430 | ST7 (+52799), WNT2 (+317163)              |
| chr13 | 94974776  | 94982877  | DCT (+153109)                             |
| chr14 | 22391009  | 22394377  | OR4E2 (+259396), DAD1 (+665482)           |
| chr14 | 98067784  | 98073837  | VRK1 (+807170)                            |
| chr10 | 135202578 | 135203544 | MTG1 (-4614), ENSG00000254536 (-1277)     |
| chr16 | 29039936  | 29041196  | LAT (+44419), NPIP11 (+374784)            |
| chr17 | 47294547  | 47297199  | ABI3 (+8284), PHOSPHO1 (+12255)           |
| chr8  | 71435414  | 71437742  | NCOA2 (-120538), TRAM1 (+84026)           |
| chr20 | 1654472   | 1656044   | SIRPA (-220684), SIRPG (-16833)           |
| chr12 | 22315923  | 22318340  | CMAS (+118024), ST8SIA1 (+170516)         |
| chr15 | 75898602  | 75899324  | PTPN9 (-27333), SNUPN (+19066)            |
| chr11 | 127920191 | 127926104 | ETS1 (+534289)                            |
| chr6  | 137708128 | 137713512 | IFNGR1 (-170234), OLIG3 (+104711)         |
| chr18 | 10139931  | 10140675  | APCDD1 (-314322), VAPA (+226244)          |
| chr3  | 27921905  | 27924415  | CMC1 (-359926), EOMES (-159171)           |
| chr18 | 2601773   | 2607785   | SMCHD1 (-50958), NDC80 (+33269)           |
| chr18 | 12047213  | 12053969  | ANKRD62 (-52114), IMPA2 (+69164)          |
| chr7  | 127052965 | 127056259 | ZNF800 (-21867), GCC1 (+171049)           |
| chr20 | 42569624  | 42572221  | TOX2 (+27431), JPH2 (+245295)             |
| chr3  | 152861923 | 152864061 | RAP2B (-17037), P2RY1 (+310256)           |
| chr16 | 72515753  | 72516254  | PMFBP1 (-309850), ZFH3 (+566270)          |
| chr20 | 56425809  | 56426447  | PMEP1 (-141170), PPP4R1L (+458367)        |
| chr5  | 49740696  | 49742706  | EMB (-4500)                               |
| chr5  | 95561701  | 95565394  | ELL2 (-265773), PCSK1 (+205436)           |
| chr9  | 86944948  | 86945449  | SLC28A3 (+10399), RMI1 (+349486)          |
| chr19 | 35731111  | 35731986  | FAM187B (-11917), LSR (-8074)             |
| chr1  | 99335832  | 99338130  | ENSG00000117598 (+133468), SNX7 (+209702) |
| chr14 | 98633428  | 98645099  | NONE                                      |
| chr8  | 61841481  | 61842166  | CLVS1 (-358690), CHD7 (+250487)           |
| chr21 | 43823991  | 43824492  | UBASH3A (+218)                            |
| chr12 | 67875547  | 67879817  | DYRK2 (-164819), CAND1 (+214621)          |
| chr14 | 62127566  | 62130225  | HIF1A (-35444), PRKCH (+340461)           |
| chr13 | 30945731  | 30946479  | KATNAL1 (-64484), HMGB1 (+245629)         |
| chr5  | 39210452  | 39210953  | RICTOR (-136193), FYB (+60056)            |
| chr8  | 121758806 | 121763531 | SNTB1 (+64344), MTBP (+303503)            |
| chr7  | 23579501  | 23580002  | CCDC126 (-57246), TRA2A (-8092)           |
| chr13 | 40350062  | 40350563  | COG6 (+120499), FOXO1 (+890421)           |
| chr9  | 131995958 | 132000794 | NTMT1 (-372787), PPP2R4 (+124779)         |
| chr7  | 114555658 | 114559052 | MDFIC (-4854)                             |
| chr14 | 106558483 | 106561534 | TMEM121 (+567069)                         |
| chr1  | 172343222 | 172343919 | PIGC (+69655), DNM3 (+532950)             |
| chr19 | 56833015  | 56833516  | ZSCAN5A (+46486), ZSCAN5D (+81493)        |
| chr1  | 88225227  | 88225860  | PKN2 (-924361), LMO4 (+431393)            |
| chr7  | 157263491 | 157265940 | DNAJB6 (+135056)                          |
| chr1  | 159795811 | 159797414 | SLAMF8 (+73)                              |
| chr6  | 166823398 | 166835284 | MPC1 (-32855), RPS6KA2 (+446698)          |
| chr17 | 46514030  | 46523305  | SKAP1 (-11116), HOXB1 (+89691)            |
| chr1  | 161898353 | 161900847 | OLFML2B (+94044), ATF6 (+163516)          |
| chr8  | 29347574  | 29348234  | DUSP4 (-139719), TMEM66 (+592819)         |
| chr3  | 78850257  | 78852028  | ROBO1 (+965822)                           |
| chr12 | 76034215  | 76036420  | KRR1 (-129917), PHLDA1 (+392394)          |
| chr18 | 46358828  | 46361999  | SMAD7 (+116667), CTIF (+294885)           |
| chr20 | 36451053  | 36451554  | VSTM2L (-80202), CTNBL1 (+128896)         |
| chr7  | 150199020 | 150202863 | GIMAP7 (-10976), GIMAP8 (+53224)          |

|       |           |           |                                     |
|-------|-----------|-----------|-------------------------------------|
| chr6  | 128270966 | 128274645 | THEMIS (-50580), PTPRK (+568922)    |
| chr5  | 146129911 | 146134740 | GPR151 (-236573), PPP2R2B (+303211) |
| chr6  | 131518490 | 131522758 | ARG1 (-373741), AKAP7 (+63818)      |
| chr14 | 71407416  | 71409986  | SIPA1L1 (-587341), PCNX (+34579)    |
| chr13 | 84708985  | 84712785  | SLITRK1 (-254357)                   |
| chr7  | 3102080   | 3103604   | SDK1 (-238238), CARD11 (-19263)     |
| chr6  | 108050798 | 108063960 | SCML4 (+88137), SOBP (+246217)      |
| chr11 | 111401322 | 111404002 | BTG4 (-19583), LAYN (-8722)         |
| chr10 | 88170377  | 88173821  | GRID1 (-45864), WAPAL (+109473)     |
| chr19 | 30111690  | 30116269  | PLEKHF1 (-41983), POP4 (+19056)     |
| chr14 | 98084091  | 98088064  | VRK1 (+822437)                      |
| chr21 | 16048245  | 16048893  | SAMSN1 (-92846), NRIP1 (+388752)    |
| chr17 | 20202833  | 20205699  | LGALS9B (+166582), SPECC1 (+213931) |
| chr2  | 175704947 | 175705573 | CHRNA1 (-76071), CHN1 (+164694)     |
| chr12 | 50055168  | 50059785  | PRPF40B (+40258), FMNL3 (+43720)    |
| chr17 | 29640259  | 29640905  | EVI2B (+548)                        |
| chr19 | 42376070  | 42376783  | CD79A (-4763)                       |
| chr21 | 35691547  | 35693150  | KCNE2 (-43974), SLC5A3 (+246479)    |
| chr1  | 200119686 | 200124971 | NR5A2 (+125599), ZNF281 (+256855)   |
| chr1  | 231746297 | 231751403 | DISC1 (-13711), TSNAX (+84451)      |
| chr2  | 99079762  | 99082494  | INPP4A (+19807), COA5 (+143827)     |
| chrX  | 45617985  | 45618486  | KRBOX4 (-688056), CXorf36 (-558090) |
| chr21 | 46076563  | 46079939  | KRTAP12-4 (-3675), KRTAP12-3 (+402) |
| chr2  | 101977127 | 101979470 | RNF149 (-53141), CREG2 (+25758)     |
| chr13 | 42970759  | 42971260  | TNFSF11 (-177279), AKAP11 (+124721) |
| chr1  | 156839851 | 156841778 | PEAR1 (-22697), NTRK1 (+10129)      |
| chr14 | 106961933 | 106965521 | TMEM121 (+970787)                   |
| chr2  | 192351234 | 192352778 | NABP1 (-191252), MYO1B (+241891)    |
| chr5  | 86375698  | 86378579  | RASA1 (-186566), COX7C (+463366)    |
| chr7  | 30777094  | 30779531  | CRHR2 (-38594), INMT (-13438)       |
| chr2  | 106542610 | 106547596 | C2orf40 (-137009), NCK2 (+183749)   |
| chr1  | 206929423 | 206933157 | IL10 (+14549), MAPKAPK2 (+72908)    |
| chr21 | 30202914  | 30210545  | N6AMT1 (+50963)                     |
| chr19 | 35728949  | 35732975  | FAM187B (-11330), LSR (-8661)       |
| chr10 | 11443178  | 11445797  | USP6NL (+129786), CELF2 (+384595)   |
| chr2  | 175008    | 178326    | FAM110C (-130282), SH3YL1 (+87398)  |
| chr13 | 51467246  | 51467747  | RNASEH2B (-16317), DLEU1 (+811190)  |
| chr18 | 10366757  | 10367258  | APCDD1 (-87617), VAPA (+452949)     |
| chr2  | 158750624 | 158757932 | PKP4 (-559346), UPP2 (+21064)       |
| chr2  | 161085084 | 161085585 | ITGB6 (-28523), RBMS1 (+264970)     |
| chr10 | 24438713  | 24442149  | KIAA1217 (-57662), OTUD1 (+712233)  |
| chr5  | 33789365  | 33790031  | ADAMTS12 (+102599), TARS (+348627)  |
| chr7  | 150362735 | 150363825 | GIMAP6 (-33807), GIMAP2 (-19508)    |
| chr3  | 32154705  | 32157147  | CMTM8 (-124245), GPD1L (+7923)      |
| chr1  | 90184495  | 90185784  | LRRC8D (-101451), LRRC8C (+86509)   |
| chr2  | 189678666 | 189679167 | COL3A1 (-160129), GULP1 (+521358)   |
| chr16 | 28320033  | 28324335  | SBK1 (+18344), EIF3CL (+92981)      |
| chr17 | 3666276   | 3671862   | ITGAE (+35468), GSG2 (+41858)       |
| chr6  | 45769730  | 45770231  | SUPT3H (-424311), CLIC5 (+278151)   |
| chr11 | 118173022 | 118193003 | CD3E (+7753), CD3D (+30446)         |
| chr13 | 27294794  | 27296848  | GPR12 (+39101), WASF3 (+163934)     |
| chr10 | 15246604  | 15252584  | NMT2 (-38902), FAM171A1 (+163464)   |
| chr1  | 198578283 | 198585914 | ATP6V1G3 (-72024), PTPRC (-26071)   |
| chr20 | 1664196   | 1668203   | SIRPA (-209742), SIRPG (-27775)     |
| chr19 | 6651661   | 6656359   | CD70 (-62847), TNFSF14 (+16589)     |
| chr8  | 134626995 | 134631398 | ST3GAL1 (-45014)                    |

|       |           |           |                                     |
|-------|-----------|-----------|-------------------------------------|
| chr3  | 109523102 | 109528242 | DPPA4 (-469253)                     |
| chr3  | 188634319 | 188635529 | TPRG1 (-254839), LPP (+704203)      |
| chr1  | 172606192 | 172610972 | FASLG (-19576), SUCO (+106225)      |
| chr2  | 113387908 | 113390104 | SLC20A1 (-14428), CHCHD5 (+46988)   |
| chr20 | 43299712  | 43301515  | WISP2 (-42871), ADA (-20231)        |
| chr17 | 10150720  | 10151221  | GAS7 (-49103), MYH13 (+125476)      |
| chr10 | 6570013   | 6573620   | PRKCQ (+50446), PFKFB3 (+326923)    |
| chr6  | 160880686 | 160884963 | SLC22A3 (+113525), LPA (+204582)    |
| chr20 | 36449171  | 36453215  | VSTM2L (-80313), CTNBNL1 (+128785)  |
| chr1  | 245913747 | 245915905 | KIF26B (+596539), SMYD3 (+755693)   |
| chr16 | 3675104   | 3677959   | DNASE1 (-25306), SLX4 (-14933)      |
| chr7  | 105488528 | 105493041 | EFCAB10 (-268842), CDHR3 (-112900)  |
| chr1  | 93001485  | 93004833  | GFI1 (-53648), EVI5 (+254802)       |
| chr10 | 27009449  | 27011763  | PDSS1 (+24018), ABI1 (+139258)      |
| chr5  | 93908829  | 93916282  | FAM172A (-465216), ANKRD32 (-41496) |
| chr1  | 193505956 | 193512515 | B3GALT2 (-353452)                   |
| chr1  | 59395158  | 59395926  | FGGY (-367111), JUN (-145757)       |
| chr7  | 68741545  | 68742418  | AUTS2 (-322337)                     |
| chr2  | 106710607 | 106711108 | C2orf40 (+28746), UXS1 (+99937)     |
| chr1  | 197746373 | 197746874 | DENND1B (-2169)                     |
| chr2  | 61045794  | 61047793  | REL (-61862), PAPOLG (+63429)       |
| chr9  | 127725966 | 127729939 | GOLGA1 (-24575), SCAI (+177822)     |
| chr18 | 10304242  | 10305701  | APCDD1 (-149653), VAPA (+390913)    |
| chr9  | 77760489  | 77769313  | PCSK5 (-740659), OSTF1 (+61442)     |
| chr8  | 66864600  | 66866727  | PDE7A (-111477), DNAJC5B (-68131)   |
| chr5  | 130403392 | 130406468 | HINT1 (+96248)                      |
| chr1  | 186157655 | 186158156 | PRG4 (-107505), HMCN1 (+454223)     |
| chr12 | 67753128  | 67753629  | DYRK2 (-289122), CAND1 (+90318)     |
| chr1  | 198159360 | 198160052 | NEK7 (+33613), ATP6V1G3 (+350369)   |
| chr4  | 78746735  | 78750312  | MRPL1 (-35150), CNOT6L (-7980)      |
| chr21 | 35704706  | 35712949  | KCNE2 (-27495), SLC5A3 (+262958)    |
| chr4  | 4267906   | 4273265   | TMEM128 (-20647), LYAR (+21310)     |
| chr21 | 27566992  | 27568491  | APP (-24770), CYR1 (+377861)        |
| chr5  | 86377578  | 86378079  | RASA1 (-185876), COX7C (+464056)    |
| chr2  | 198186440 | 198190386 | ANKRD44 (-12902), SF3B1 (+111402)   |
| chr20 | 1711451   | 1713510   | SIRPA (-163461), SIRPG (-74056)     |
| chr2  | 231181635 | 231185037 | SP140L (-8563), SP140 (+92890)      |
| chr6  | 34149232  | 34151881  | HMGA1 (-54093), GRM4 (-49114)       |
| chr12 | 90272120  | 90278238  | ATP2B1 (-172571)                    |
| chr17 | 63173667  | 63179923  | RGS9 (+43203), AXIN2 (+380970)      |
| chr3  | 54908909  | 54910043  | LRTM1 (+52625), CACNA2D3 (+752783)  |
| chr15 | 51116685  | 51119254  | AP4E1 (-82900), SPPL2A (-59965)     |
| chr6  | 69465757  | 69466258  | BAI3 (+120749)                      |
| chr1  | 84609279  | 84610525  | PRKACB (-52)                        |
| chr1  | 98854366  | 98854867  | DPYD (-468038), SNX7 (-272662)      |
| chr10 | 31389293  | 31391440  | ZEB1 (-217734), ZNF438 (-69501)     |
| chr2  | 181988127 | 181993464 | ITGA4 (-331156), UBE2E3 (+145463)   |
| chr2  | 48319903  | 48320404  | FOXN2 (-221695), FBXO11 (-187222)   |
| chr2  | 48315122  | 48318201  | FOXN2 (-225187), FBXO11 (-183730)   |
| chr8  | 129586839 | 129590085 | TMEM75 (-627871)                    |
| chr1  | 16746405  | 16748515  | RSG1 (-183803), SPATA21 (+16459)    |
| chr8  | 49319315  | 49323469  | EFCAB1 (+326399), UBE2V2 (+400432)  |
| chr1  | 30180789  | 30184847  | PTPRU (+619790)                     |
| chr9  | 75056470  | 75058230  | TMC1 (-79367), ZFAND5 (-77187)      |
| chr14 | 62604586  | 62607472  | SYT16 (+143488), KCNH5 (+906144)    |
| chr22 | 23094680  | 23103469  | IGLL5 (-130885), GGTL2 (+110259)    |

|       |           |           |                                      |
|-------|-----------|-----------|--------------------------------------|
| chrX  | 39711662  | 39717937  | BCOR (+241856)                       |
| chr2  | 168887693 | 168888194 | B3GALT1 (+212762), STK39 (+216707)   |
| chr4  | 156514644 | 156515145 | MAP9 (-216773), GUCY1A3 (-73455)     |
| chr6  | 139446301 | 139448105 | REPS1 (-137805), HECA (-9046)        |
| chr4  | 158963136 | 158963870 | FAM198B (+130699), GRIA2 (+821633)   |
| chr5  | 130405856 | 130406357 | HINT1 (+95071)                       |
| chr6  | 149357201 | 149357702 | TAB2 (-284736), UST (+288988)        |
| chr12 | 40075968  | 40078098  | ABCD2 (-63480), SLC2A13 (+422628)    |
| chr4  | 169552261 | 169554306 | PALLD (+135029), CBR4 (+378125)      |
| chr10 | 73843915  | 73844416  | SPOCK2 (+4365), CHST3 (+120043)      |
| chr16 | 79311186  | 79314495  | MAF (+321770)                        |
| chr10 | 7526666   | 7527451   | SFMBT2 (-75756), ITIH5 (+181875)     |
| chr8  | 117435915 | 117436416 | TRPS1 (-754938), EIF3H (+331894)     |
| chr11 | 89190002  | 89193520  | NOX4 (+32892), TYR (+281141)         |
| chr2  | 38908095  | 38912823  | GALM (+17407), SRSF7 (+68177)        |
| chr18 | 43265152  | 43269676  | SLC14A1 (-39276), SLC14A2 (+72648)   |
| chr5  | 109190887 | 109196636 | MAN2A1 (+168695), TMEM232 (+868604)  |
| chr6  | 86377272  | 86381184  | SYNCRIP (-26225)                     |
| chr7  | 8163860   | 8192721   | ICA1 (+123620), GLCCI1 (+169866)     |
| chr1  | 66961461  | 66961962  | SGIP1 (-38253), PDE4B (+703515)      |
| chr12 | 131351867 | 131354112 | RAN (-3434)                          |
| chr2  | 197063135 | 197067844 | STK17B (-29191), HECW2 (+391845)     |
| chr1  | 78805372  | 78805873  | PTGFR (-151134), GIPC2 (+294037)     |
| chr4  | 157219875 | 157220376 | CTSO (-345057), PDGFC (+672420)      |
| chr4  | 6178808   | 6186584   | CRMP1 (-287911), JAKMIP1 (+19586)    |
| chr15 | 22481740  | 22485082  | TUBGCP5 (-349984), OR4N4 (+101029)   |
| chr6  | 128573821 | 128574322 | THEMIS (-351846), PTPRK (+267656)    |
| chr12 | 27332343  | 27332844  | STK38L (-64514), MED21 (+157111)     |
| chr1  | 202597054 | 202598713 | SYT2 (+14697), PPP1R12B (+280057)    |
| chr3  | 114003674 | 114005983 | ZNF80 (-48404), TIGIT (-5120)        |
| chr7  | 134353049 | 134355968 | CALD1 (-109892), BPGM (+22926)       |
| chr18 | 10251872  | 10254935  | APCDD1 (-201221), VAPA (+339345)     |
| chr9  | 118376666 | 118379982 | PAPPA (-537759), DEC1 (+474227)      |
| chr7  | 92534127  | 92534628  | CDK6 (-71147), SAMD9 (+212958)       |
| chr4  | 164583040 | 164589490 | TKTL2 (-191218), MARCH1 (+718937)    |
| chr5  | 42985030  | 42985531  | SEPP1 (-173100), ZNF131 (-136419)    |
| chr1  | 160765956 | 160766917 | LY9 (+489)                           |
| chr6  | 135448736 | 135451339 | HBS1L (-74002), MYB (-52415)         |
| chr15 | 82374429  | 82374930  | MEX3B (-36198), EFTUD1 (+180424)     |
| chr12 | 9515492   | 9519753   | PZP (-156657), KLRB1 (+242859)       |
| chr20 | 51022194  | 51024690  | TSHZ2 (-565504), ZFP64 (-214917)     |
| chr10 | 6583655   | 6587860   | PRKCQ (+36505), PFKFB3 (+340864)     |
| chr2  | 231466290 | 231469334 | CAB39 (-109748), SP100 (+186831)     |
| chr6  | 128253820 | 128257185 | THEMIS (-33277), PTPRK (+586225)     |
| chr2  | 198190918 | 198194067 | ANKRD44 (-16982), SF3B1 (+107322)    |
| chr10 | 127843151 | 127843785 | ADAM12 (+233556), FANK1 (+258360)    |
| chr2  | 69498992  | 69499635  | GFPT1 (+115068), ANTXR1 (+259004)    |
| chr4  | 122109736 | 122114413 | NDNF (-118402), TNIP3 (+36546)       |
| chr4  | 156820143 | 156823804 | TDO2 (-2873)                         |
| chr1  | 239880776 | 239885688 | FMN2 (-371948), CHRM3 (+90859)       |
| chr9  | 92033554  | 92034055  | SEMA4D (-57)                         |
| chr3  | 78785068  | 78788022  | NONE                                 |
| chr2  | 113463007 | 113468033 | NT5DC4 (-13543), SLC20A1 (+62086)    |
| chr1  | 114402798 | 114403299 | RSBN1 (-47951), PTPN22 (+11332)      |
| chr5  | 76026117  | 76031015  | F2RL1 (-86236), F2R (+16698)         |
| chr4  | 99367337  | 99367838  | RAP1GDS1 (+184919), TSPAN5 (+212192) |

|       |           |           |                                       |
|-------|-----------|-----------|---------------------------------------|
| chr6  | 128222270 | 128222902 | THEMIS (-360)                         |
| chr3  | 46317689  | 46345641  | CCR2 (-63570), CCR3 (+47793)          |
| chr3  | 122477773 | 122478274 | HSPBAP1 (+34647), PARP14 (+78559)     |
| chr3  | 111259920 | 111270842 | CD96 (+4416), ZBED2 (+48909)          |
| chr8  | 82411709  | 82412381  | FABP4 (-16547), FABP12 (+31568)       |
| chr8  | 135053713 | 135057365 | ST3GAL1 (-471356), ZFAT (+669742)     |
| chr12 | 92449067  | 92451171  | DCN (-873219), BTG1 (+89554)          |
| chr1  | 114882886 | 114886275 | SYT6 (-188109), TRIM33 (+169200)      |
| chr1  | 175177259 | 175181143 | TNN (+142207), TNR (+533705)          |
| chr21 | 16885661  | 16887834  | NRIP1 (-449427), USP25 (-215596)      |
| chr20 | 42379128  | 42381600  | TOX2 (-163128), GTSF1L (-24726)       |
| chr14 | 81395529  | 81399050  | DIO2 (-719447), CEP128 (+10839)       |
| chr11 | 89191216  | 89192511  | NOX4 (+32789), TYR (+281244)          |
| chr1  | 219596146 | 219596647 | LYPLAL1 (+249211), SLC30A10 (+505547) |
| chr12 | 67908162  | 67911718  | DYRK2 (-132561), CAND1 (+246879)      |
| chr10 | 6514443   | 6517764   | PRKCQ (+106159), PFKFB3 (+271210)     |
| chr3  | 128641201 | 128643219 | EFCC1 (-78262), ACAD9 (+43756)        |
| chr22 | 39510586  | 39515064  | APOBEC3H (+19545), CBX7 (+35830)      |
| chr14 | 76341580  | 76347447  | TGFB3 (+103020), TTLL5 (+216893)      |
| chr7  | 40337374  | 40337875  | C7orf10 (+163050)                     |
| chr1  | 167586598 | 167587099 | CREG1 (-63845), RCS1 (-12481)         |
| chr1  | 111178182 | 111178836 | KCNA2 (-28458), KCNA3 (+39146)        |
| chr14 | 76298257  | 76298885  | TGFB3 (+148963), TTLL5 (+170950)      |
| chr7  | 24494764  | 24497580  | MPP6 (-116913), NPY (+172365)         |
| chr13 | 42927196  | 42931577  | TNFSF11 (-218902), AKAP11 (+83098)    |
| chr19 | 6801325   | 6803162   | EMR1 (-85339), VAV1 (+29507)          |
| chr2  | 85173145  | 85173915  | KCMF1 (-24686), TMSB10 (+40781)       |
| chr10 | 26768943  | 26769444  | PDSS1 (-217394), APBB1IP (+42062)     |
| chr6  | 149366464 | 149368223 | TAB2 (-274844), UST (+298880)         |
| chr16 | 84551289  | 84553814  | TLDC1 (-14188), COTL1 (+99131)        |
| chr3  | 99748318  | 99754169  | FILIP1L (+82113), COL8A1 (+393925)    |
| chr21 | 36135507  | 36136225  | CLIC6 (+94178), RUNX1 (+285775)       |
| chr13 | 95920541  | 95921042  | SOX21 (-556403), ABCC4 (+32891)       |
| chr1  | 167478905 | 167488722 | CD247 (+3961), POU2F1 (+293748)       |
| chr2  | 237450101 | 237450902 | IQCA1 (-34317), ACKR3 (-27782)        |
| chr16 | 31880100  | 31881588  | ZNF267 (-4235)                        |
| chr10 | 7086540   | 7090299   | PRKCQ (-466157), SFMBT2 (+362883)     |
| chr12 | 69798515  | 69799150  | FRS2 (-65296), YEATS4 (+45350)        |
| chr11 | 132226816 | 132229261 | NTM (+446683), OPCML (+585527)        |
| chr3  | 27753616  | 27764399  | SLC4A7 (-260763), EOMES (+4981)       |
| chr10 | 127933029 | 127933710 | ADAM12 (+143654), FANK1 (+348262)     |
| chr5  | 52038357  | 52042202  | ITGA1 (-43450)                        |
| chr3  | 114882015 | 114885290 | ZBTB20 (-781165), GAP43 (-458704)     |
| chr10 | 7548547   | 7551136   | SFMBT2 (-98539), ITIH5 (+159092)      |
| chr13 | 21002770  | 21003271  | GJB6 (-196487), CRYL1 (+96975)        |
| chr1  | 83568798  | 83569299  | TTLL7 (+895766)                       |
| chr2  | 204856555 | 204860689 | PARD3B (-552101), ICOS (+57151)       |
| chr9  | 135523378 | 135523879 | GTF3C4 (-21793), BARHL1 (+66057)      |
| chr18 | 53456541  | 53458263  | TCF4 (-154217), TXNL1 (+848474)       |
| chr17 | 3673225   | 3674837   | ITGAE (+30506), GSG2 (+46820)         |
| chr12 | 106377918 | 106378593 | APPL2 (-748395), NUA1 (+155555)       |
| chr20 | 11125205  | 11125706  | JAG1 (-470762)                        |
| chr6  | 30978003  | 30978504  | MUC22 (+3)                            |
| chr20 | 35595144  | 35604869  | SAMHD1 (-19761), RBL1 (+124391)       |
| chr9  | 91651396  | 91651897  | S1PR3 (+40226), SHC3 (+142035)        |
| chr1  | 198904810 | 198906714 | PTPRC (+297592)                       |



|       |           |           |                                      |
|-------|-----------|-----------|--------------------------------------|
| chr1  | 160545538 | 160546039 | SLAMF6 (-52746), CD84 (+3505)        |
| chr8  | 126537300 | 126538621 | TRIB1 (+95398)                       |
| chr8  | 49318285  | 49323865  | EFCAB1 (+326716), UBE2V2 (+400115)   |
| chr18 | 76915989  | 76918459  | NFATC1 (-243112), ATP9B (+87830)     |
| chr7  | 134309965 | 134310466 | BPGM (-21367), AKR1B15 (+76328)      |
| chr11 | 103668213 | 103668714 | DDI1 (-238844), DYNC2H1 (+688160)    |
| chr6  | 24947481  | 24958018  | LRRC16A (-326906), FAM65B (-41555)   |
| chr2  | 196474756 | 196475425 | SLC39A10 (-46380)                    |
| chr3  | 159887144 | 159887645 | C3orf80 (-56028), IL12A (+180858)    |
| chr3  | 98266577  | 98288499  | GPR15 (+26795), CPOX (+35029)        |
| chr5  | 143568949 | 143569450 | YIPF5 (-18977), KCTD16 (-15640)      |
| chr21 | 40138686  | 40139187  | ERG (-105319), ETS2 (-38294)         |
| chr7  | 55374643  | 55378677  | LANCL2 (-56481), EGFR (+289866)      |
| chr5  | 148226158 | 148231384 | ADRB2 (+22615), SH3TC2 (+213916)     |
| chr3  | 10436270  | 10439245  | SEC13 (-74896), ATP2B2 (+109510)     |
| chr1  | 90203975  | 90207236  | LRRC8D (-80985), LRRC8C (+106975)    |
| chr2  | 102012128 | 102012863 | CREG2 (-8439), RFX8 (+78669)         |
| chr15 | 33120156  | 33120657  | GREM1 (+110232), FMN1 (+239678)      |
| chr11 | 34634115  | 34637467  | ELF5 (-102445), EHF (-18220)         |
| chr10 | 7512255   | 7516059   | SFMBT2 (-62854), ITIH5 (+194777)     |
| chr6  | 45587952  | 45588453  | SUPT3H (-242533), CLIC5 (+459929)    |
| chrX  | 53740211  | 53745674  | HUWE1 (-31829), PHF8 (+328739)       |
| chr8  | 121791451 | 121792102 | SNTB1 (+33736), MTBP (+334111)       |
| chr10 | 7070605   | 7071106   | PRKCQ (-448593), SFMBT2 (+380447)    |
| chr3  | 99114706  | 99116199  | DCBLD2 (-494920), COL8A1 (-241866)   |
| chr20 | 51018512  | 51029692  | TSHZ2 (-564844), ZFP64 (-215577)     |
| chr22 | 40294686  | 40318612  | TNRC6B (-267280), GRAP2 (+9563)      |
| chr3  | 9321402   | 9323525   | THUMPD3 (-82272), SRGAP3 (-31401)    |
| chr8  | 52090586  | 52091431  | PXDNL (+630996)                      |
| chr3  | 108320966 | 108323738 | DZIP3 (+13823), RETNLB (+153879)     |
| chr2  | 38935176  | 38938378  | SRSF7 (+41859), GALM (+43725)        |
| chr3  | 167657646 | 167658275 | GOLIM4 (+155802), SERPINI1 (+204450) |
| chr6  | 146185909 | 146189673 | FBXO30 (-51902), SHPRH (+97734)      |
| chrX  | 47220959  | 47222417  | ZNF157 (-8294), USP11 (+129374)      |
| chr10 | 26734030  | 26739969  | PDSS1 (-249588), APBB1IP (+9868)     |
| chr17 | 46587568  | 46589437  | SKAP1 (-80951), HOXB1 (+19856)       |
| chr1  | 170258877 | 170262648 | GORAB (-240507), METTL11B (+145621)  |
| chr15 | 75072654  | 75073315  | CSK (-1413)                          |
| chr2  | 87795239  | 87795740  | PLGLB1 (-546515), PLGLB2 (-252116)   |
| chr10 | 72422305  | 72423276  | PRF1 (-60260), ADAMTS14 (-9768)      |
| chr19 | 54875996  | 54876756  | LAIR1 (+188)                         |
| chr1  | 170414668 | 170415169 | GORAB (-86351), METTL11B (+299777)   |
| chr1  | 42148848  | 42149349  | EDN2 (-198757), HIVEP3 (+235070)     |
| chr10 | 70959829  | 70966597  | HKDC1 (-16846), SUPV3L1 (+23225)     |
| chr5  | 156604703 | 156627524 | CYFIP2 (-77024), ITK (+8277)         |
| chr3  | 113948946 | 113955155 | DRD3 (-54152), ZNF80 (+4374)         |
| chr16 | 29748907  | 29751133  | C16orf54 (+7307), QPRT (+59662)      |
| chr6  | 25036895  | 25037563  | LRRC16A (-242427), FAM65B (-126034)  |
| chr9  | 21575499  | 21580783  | MTAP (-224401), IFNE (-95829)        |
| chr1  | 40524764  | 40526064  | CAP1 (+19509), PPT1 (+37961)         |
| chr6  | 105626636 | 105628410 | POPDC3 (+212)                        |
| chr1  | 41093278  | 41096763  | RIMS3 (+36308), ZNF684 (+97788)      |
| chr6  | 143497136 | 143497637 | AIG1 (+115374), ADAT2 (+274423)      |
| chr11 | 76411936  | 76412437  | TSKU (-90609), LRRC32 (-31143)       |
| chr1  | 233056692 | 233062258 | NTPCR (-26895), MAP10 (+118832)      |
| chr7  | 76435671  | 76436172  | POMZP3 (-179364), FGL2 (+393221)     |

|       |           |           |                                             |
|-------|-----------|-----------|---------------------------------------------|
| chr18 | 10376684  | 10380132  | APCDD1 (-76217), VAPA (+464349)             |
| chr19 | 51625920  | 51628840  | SIGLEC9 (-785)                              |
| chr16 | 64474636  | 64475137  | CDH11 (+681214)                             |
| chr1  | 162598867 | 162599368 | DDR2 (-3137)                                |
| chr13 | 37956069  | 37957038  | CSNK1A1L (-276751), POSTN (+216427)         |
| chr6  | 29676934  | 29677435  | ZFP57 (-32254), HLA-F (-14000)              |
| chr20 | 19476493  | 19478702  | RIN2 (-389567), SLC24A3 (+284308)           |
| chr3  | 72804907  | 72807455  | RYBP (-310112), SHQ1 (+91450)               |
| chr2  | 9794554   | 9797685   | TAF1B (-187363), YWHAQ (-25375)             |
| chr1  | 64758190  | 64758691  | CACHD1 (-178034), UBE2U (+88951)            |
| chr1  | 160677037 | 160677538 | SLAMF1 (-60203), CD48 (+4353)               |
| chr8  | 136220083 | 136226600 | ZFAT (-498061), KHDRBS3 (-246358)           |
| chr9  | 80815241  | 80817253  | GNAQ (-169873), CEP78 (-34876)              |
| chr18 | 11516814  | 11517315  | PIEZO2 (-368478), GNAL (-171890)            |
| chr1  | 160708062 | 160721378 | LY9 (-51228), SLAMF7 (+5665)                |
| chr14 | 99449059  | 99451867  | BCL11B (+287102)                            |
| chr10 | 24438765  | 24442963  | KIAA1217 (-57229), OTUD1 (+712666)          |
| chr1  | 32291288  | 32294170  | SPOCD1 (-11077), PTP4A2 (+111259)           |
| chr5  | 153577881 | 153578382 | SAP30L (-247385), GALNT10 (+7842)           |
| chr10 | 63988622  | 64005863  | RTKN2 (+31223), ARID5B (+336184)            |
| chr5  | 78077133  | 78080357  | LHFPL2 (-134097), ARSB (+202863)            |
| chr2  | 54220494  | 54224536  | ACYP2 (-120126), PSME4 (-24538)             |
| chr3  | 46395443  | 46396241  | CCR2 (+607)                                 |
| chr5  | 131309769 | 131312044 | FNIP1 (-178197), ACSL6 (+36448)             |
| chr20 | 56501586  | 56504345  | PMEP1 (-218008), PPP4R1L (+381529)          |
| chr6  | 44615198  | 44615699  | RUNX2 (-680657), CDC5L (+260187)            |
| chr3  | 71544868  | 71545974  | FOXP1 (-365433), EIF4E3 (+229105)           |
| chr14 | 98653581  | 98654082  | NONE                                        |
| chr9  | 3397252   | 3399095   | KIAA0020 (-553933), RFX3 (+127809)          |
| chr6  | 122205356 | 122205857 | HSF2 (-515084), GJA1 (+448769)              |
| chr8  | 124107482 | 124109490 | TBC1D31 (+23566), ZHX1 (+178249)            |
| chr7  | 151464792 | 151467889 | RHEB (-249331), PRKAG2 (+107869)            |
| chr18 | 10365011  | 10365512  | APCDD1 (-89363), VAPA (+451203)             |
| chr7  | 106765890 | 106768255 | HBP1 (-42387), PRKAR2B (+81979)             |
| chr15 | 77558482  | 77561022  | TSPAN3 (-196182), ENSG00000173517 (+152734) |
| chr9  | 92147733  | 92155281  | SEMA4D (-117759), GADD45G (-68421)          |
| chr5  | 153051399 | 153051900 | GRIA1 (+179918), FAM114A2 (+366829)         |
| chr6  | 21263567  | 21266919  | SOX4 (-328729), CDKAL1 (+730555)            |
| chr12 | 55370489  | 55380382  | TESPA1 (+3020), MUCL1 (+127115)             |
| chr8  | 29636679  | 29637830  | DUSP4 (-429070), TMEM66 (+303468)           |
| chr16 | 23958244  | 23964833  | CACNG3 (-305335), PRKCB (+114194)           |
| chr15 | 52336797  | 52340381  | MAPK6 (+27191), BCL2L10 (+66383)            |
| chr9  | 139988833 | 139992066 | MAN1B1 (+9071), DPP7 (+18720)               |
| chr3  | 32412144  | 32414527  | CMTM7 (-19827), CMTM8 (+133165)             |
| chr2  | 25599916  | 25600417  | DNMT3A (-34708), DTNB (+296336)             |
| chr17 | 20203786  | 20204428  | LGALS9B (+166741), SPECC1 (+213772)         |
| chr10 | 71851519  | 71853726  | AIFM2 (+40067), H2AFY2 (+40071)             |
| chr6  | 138087607 | 138090686 | OLIG3 (-273616), TNFAIP3 (-99434)           |
| chr11 | 121351678 | 121355767 | SORL1 (+30811), BLID (+633200)              |
| chr2  | 317228    | 318893    | FAM150B (-29765), TMEM18 (+359378)          |
| chr10 | 5605358   | 5608385   | CALML3 (+39948), ASB13 (+101669)            |
| chr9  | 92133045  | 92147246  | SEMA4D (-106398), GADD45G (-79782)          |
| chr2  | 134990169 | 134991830 | MGAT5 (+113247), TMEM163 (+485570)          |
| chr15 | 60095179  | 60096821  | FOXB1 (-200421), BNIP2 (-114267)            |
| chr3  | 46342823  | 46343532  | CCR2 (-52057), CCR3 (+59306)                |
| chr10 | 19025467  | 19029071  | C10orf112 (-465510), ARL5B (+78935)         |

|       |           |           |                                       |
|-------|-----------|-----------|---------------------------------------|
| chr17 | 29655712  | 29656655  | RAB11FIP4 (-62458), EVI2A (-7417)     |
| chr2  | 225806551 | 225825252 | CUL3 (-365837), DOCK10 (+91257)       |
| chr15 | 52772711  | 52777375  | MYO5C (-187048), MYO5A (+46204)       |
| chr14 | 93044282  | 93044783  | RIN3 (+64415), LGMN (+170491)         |
| chr3  | 151912737 | 151913238 | MBNL1 (-72841), SUCNR1 (+321557)      |
| chr4  | 81058515  | 81062386  | ANTXR2 (-66734), PRDM8 (-45973)       |
| chrX  | 19822153  | 19824380  | MAP3K15 (-289888), SH3KBP1 (+82452)   |
| chr5  | 111265718 | 111266543 | STARD4 (-417923), NREP (+46497)       |
| chr12 | 22382892  | 22383393  | ST8SIA1 (+104505), CMAS (+184035)     |
| chrX  | 70415403  | 70418708  | GJB1 (-18006), NLGN3 (+52344)         |
| chrX  | 78350567  | 78354479  | GPR174 (-73946), P2RY10 (+151605)     |
| chr3  | 177358634 | 177363051 | KCNMB2 (-915645), TBL1XR1 (-446577)   |
| chr17 | 60867817  | 60868318  | MARCH10 (+17627), MRC2 (+163306)      |
| chr5  | 148777177 | 148777678 | IL17B (-18589), CSNK1A1 (+153099)     |
| chr2  | 238033328 | 238033829 | COPS8 (+39624), COL6A3 (+289439)      |
| chr2  | 204815992 | 204816621 | PAR3B (-594416), ICOS (+14836)        |
| chr6  | 45622844  | 45625012  | SUPT3H (-278258), CLIC5 (+424204)     |
| chr16 | 87927105  | 87932951  | SLC7A5 (-26934), CA5A (+40094)        |
| chr19 | 33650672  | 33652484  | LRP3 (-33912), GPATCH1 (+79792)       |
| chr1  | 30180390  | 30186380  | PTPRU (+620357)                       |
| chr4  | 99366494  | 99370927  | RAP1GDS1 (+186042), TSPAN5 (+211069)  |
| chr2  | 189461995 | 189468712 | COL3A1 (-373692), GULP1 (+307795)     |
| chr2  | 227758460 | 227759283 | RHBDD1 (+58201), COL4A4 (+269957)     |
| chr9  | 79191205  | 79191875  | GCNT1 (+134958), PRUNE2 (+329463)     |
| chr11 | 89112191  | 89117537  | NOX4 (+109789), TYR (+204244)         |
| chr3  | 99375000  | 99379333  | COL8A1 (+19848), FILIP1L (+456190)    |
| chr3  | 70861310  | 70862418  | FOXP1 (+318124)                       |
| chr8  | 41371265  | 41375391  | GIN54 (-13397), GOLGA7 (+25155)       |
| chr1  | 111330223 | 111330724 | KCNA3 (-112819), CD53 (-85302)        |
| chr5  | 111289273 | 111289774 | STARD4 (-441316), NREP (+23104)       |
| chr1  | 246131984 | 246132485 | SMYD3 (+538284), KIF26B (+813948)     |
| chr2  | 74803140  | 74804946  | DOK1 (+22830), M1AP (+71121)          |
| chr7  | 116923740 | 116924241 | WNT2 (+39352), ST7 (+330610)          |
| chr11 | 118568930 | 118571992 | TREH (-20080), DDX6 (+91384)          |
| chr13 | 50893145  | 50895275  | RNASEH2B (-589604), DLEU1 (+237903)   |
| chr2  | 150505735 | 150506236 | MMADHC (-61870), RND3 (+838195)       |
| chr12 | 94675719  | 94677825  | PLXNC1 (+134273), CCDC41 (+176956)    |
| chr15 | 89610675  | 89611864  | MFGE8 (-154628), ABHD2 (-20111)       |
| chr10 | 20911722  | 20914814  | NEBL (+273263), PLXDC2 (+808100)      |
| chr12 | 67751187  | 67752167  | DYRK2 (-290824), CAND1 (+88616)       |
| chr12 | 9889519   | 9890237   | CLECL1 (-3983)                        |
| chr9  | 137685817 | 137716331 | FCN2 (-71584), COL5A1 (+167454)       |
| chr4  | 152999756 | 153002968 | PET112 (-319187), FBXW7 (+455891)     |
| chr8  | 66862735  | 66863952  | PDE7A (-109157), DNAJC5B (-70451)     |
| chr17 | 34430188  | 34436258  | CCL4 (+2240), TBC1D3B (+70765)        |
| chr5  | 130881032 | 130886680 | RAPGEF6 (+86948), CDC42SE2 (+284063)  |
| chr6  | 130348296 | 130351378 | L3MBTL3 (+14993), SAMD3 (+336733)     |
| chr7  | 114570181 | 114572098 | MDFIC (+8931)                         |
| chr8  | 23087720  | 23089226  | CHMP7 (-12677), TNFRSF10A (-5834)     |
| chr11 | 117829371 | 117831767 | TMPRSS13 (-30489), IL10RA (-26494)    |
| chr14 | 87614531  | 87615918  | GALC (+844390)                        |
| chr6  | 21438810  | 21439311  | SOX4 (-154911), CDKAL1 (+904373)      |
| chr17 | 74992210  | 74996162  | SEC14L1 (-90645), MGAT5B (+125457)    |
| chr2  | 74801675  | 74802176  | DOK1 (+20713), M1AP (+73238)          |
| chr7  | 17617640  | 17625978  | AHR (+283563), SNX13 (+358308)        |
| chr5  | 130849151 | 130851588 | RAPGEF6 (+120434), CDC42SE2 (+250577) |

|       |           |           |                                     |
|-------|-----------|-----------|-------------------------------------|
| chr20 | 32391305  | 32392276  | CHMP4B (-7319), ZNF341 (+72328)     |
| chr12 | 89861374  | 89864304  | DUSP6 (-115791), GALNT4 (+55744)    |
| chr5  | 983609    | 984422    | BRD9 (-91077), NKD2 (-24928)        |
| chr18 | 12047787  | 12050812  | ANKRD62 (-53405), IMPA2 (+67873)    |
| chr1  | 72121826  | 72127879  | ZRANB2 (-577873), NEGR1 (+623564)   |
| chr12 | 31956427  | 31958087  | BICD1 (-302906), H3F3C (-12082)     |
| chr6  | 139446019 | 139451165 | REPS1 (-139194), HECA (-7657)       |
| chr2  | 27612606  | 27616132  | ZNF513 (-10777), PPM1G (+18185)     |
| chr15 | 80258383  | 80264797  | ST20-MTHFS (-45504), BCL2A1 (+2198) |
| chr3  | 148994315 | 148996171 | CP (-55401), TM4SF18 (+56305)       |
| chr13 | 38019816  | 38022674  | CSNK1A1L (-341442), POSTN (+151736) |
| chr17 | 42634181  | 42634814  | FZD2 (-427)                         |
| chr18 | 21580563  | 21581064  | CABYR (-138128), LAMA3 (+311407)    |
| chr18 | 56281077  | 56284248  | ALPK2 (+13526), NEDD4L (+571053)    |
| chr18 | 67611331  | 67618218  | CD226 (+9457), DOK6 (+546484)       |
| chr9  | 116430719 | 116431220 | ZNF618 (-207592), RGS3 (+223959)    |
| chr3  | 55032746  | 55034644  | LRTM1 (-71594), WNT5A (+490278)     |
| chr7  | 105086518 | 105091217 | SRPK2 (-59527), PUS7 (+73837)       |
| chr17 | 63169850  | 63170351  | RGS9 (+36509), AXIN2 (+387664)      |
| chr3  | 46254729  | 46255230  | CCR3 (-28892), CCR1 (-5093)         |
| chr2  | 225813432 | 225813933 | CUL3 (-363618), DOCK10 (+93476)     |
| chr10 | 128084061 | 128087414 | ADAM12 (-8714), C10orf90 (+124272)  |
| chr2  | 69915909  | 69923538  | ANXA4 (-49382), AAK1 (-48875)       |
| chr2  | 85165146  | 85168639  | KCMF1 (-31323), TMSB10 (+34144)     |
| chr16 | 86618505  | 86620602  | FOXL1 (+7439), FBXO31 (+797809)     |
| chr14 | 39701863  | 39702364  | MIA2 (-1006)                        |
| chr1  | 173173327 | 173177058 | TNFSF18 (-155090), TNFSF4 (+1259)   |
| chr1  | 33262703  | 33267548  | SYNC (-96406), S100BPB (-18030)     |
| chr16 | 57868201  | 57870374  | KIFC3 (-32788), CNGB1 (+135728)     |
| chr2  | 112938742 | 112942226 | FBLN7 (+44522), ZC3H8 (+72204)      |
| chr1  | 161898334 | 161905305 | OLFML2B (+91824), ATF6 (+165736)    |
| chr4  | 156548997 | 156552451 | MAP9 (-252602), GUCY1A3 (-37626)    |
| chr12 | 104878603 | 104879104 | CHST11 (+28103), SLC41A2 (+443579)  |
| chr7  | 107718443 | 107719072 | LAMB1 (-75058), LAMB4 (+52043)      |
| chr1  | 23938055  | 23942350  | RPL11 (-78066), ID3 (-53918)        |
| chr6  | 52253048  | 52260113  | EFHC1 (-28525), PAQR8 (+29655)      |
| chr2  | 235072022 | 235076018 | SPP2 (+114677), ARL4C (+331677)     |
| chr1  | 226612141 | 226614039 | C1orf95 (-123411), PARP1 (-17316)   |
| chr6  | 75287276  | 75289234  | COL12A1 (+627512), CD109 (+882428)  |
| chrX  | 30592656  | 30597088  | NROB1 (-267157), GK (-76604)        |
| chr11 | 106913421 | 106914104 | GUCY1A2 (-24592), CWF19L2 (+414807) |
| chr4  | 154719976 | 154720477 | SFRP2 (-9955), DCHS2 (+592222)      |
| chr2  | 68649959  | 68657731  | APLF (-40848), PLEK (+61540)        |
| chr5  | 126083122 | 126085059 | LMNB1 (-28749), PHAX (+148131)      |
| chr7  | 8053970   | 8055690   | GLCCI1 (+46405), ICA1 (+247081)     |
| chr11 | 128397240 | 128397946 | ETS1 (+59844)                       |
| chr9  | 27785153  | 27785654  | C9orf72 (-211956), LINGO2 (+884879) |
| chr9  | 139990474 | 139990975 | MAN1B1 (+9346), DPP7 (+18445)       |
| chr13 | 37743153  | 37743812  | CSNK1A1L (-63680), POSTN (+429498)  |
| chrX  | 23971831  | 23972332  | APOO (-46031), KLHL15 (+73221)      |
| chr10 | 63990203  | 63990704  | RTKN2 (+38012), ARID5B (+329395)    |
| chr18 | 10070264  | 10070765  | APCDD1 (-384110), VAPA (+156456)    |
| chr1  | 101748523 | 101750811 | S1PR1 (+47223), OLFM3 (+712919)     |
| chr15 | 41277482  | 41278211  | CHAC1 (+32500), INO80 (+130705)     |
| chr5  | 168908    | 169609    | SDHA (-49097), PLEKHG4B (+28886)    |
| chr10 | 72410868  | 72417625  | PRF1 (-51716), ADAMTS14 (-18312)    |

|       |           |           |                                      |
|-------|-----------|-----------|--------------------------------------|
| chr1  | 222097493 | 222097994 | DUSP10 (-182226), HHIPL2 (+623701)   |
| chr20 | 36903406  | 36905253  | TGM2 (-110556), BPI (-28195)         |
| chr21 | 35653238  | 35653739  | KCNE2 (-82834), SLC5A3 (+207619)     |
| chr19 | 6575766   | 6578871   | CD70 (+13844), TNFSF9 (+46309)       |
| chr8  | 66855761  | 66856262  | PDE7A (-101825), DNAJC5B (-77783)    |
| chr2  | 42522259  | 42527406  | COX7A2L (+71317), EML4 (+128343)     |
| chr5  | 111332359 | 111335983 | NREP (-21543), EPB41L4A (+420842)    |
| chr2  | 99269346  | 99282885  | UNC50 (+51074), MGAT4A (+71473)      |
| chr2  | 146450155 | 146450656 | NONE                                 |
| chr6  | 25024865  | 25029011  | LRR16A (-252718), FAM65B (-115743)   |
| chr12 | 15696863  | 15701432  | PTPRO (+223817), EPS8 (+243362)      |
| chr6  | 122202970 | 122203471 | HSF2 (-517470), GJA1 (+446383)       |
| chrX  | 15799263  | 15801502  | ZRSR2 (-8212), CA5B (+43990)         |
| chr11 | 122956461 | 122959996 | HSPA8 (-25186), CLMP (+107760)       |
| chr6  | 106089881 | 106100630 | PRDM1 (-438939), PREP (-244297)      |
| chr2  | 237443142 | 237447768 | ACKR3 (-32829), IQCA1 (-29270)       |
| chr2  | 216581377 | 216584378 | FN1 (-281983), MREG (+295468)        |
| chr22 | 41371596  | 41372097  | EP300 (-115943), RBX1 (+24484)       |
| chr6  | 21634204  | 21635497  | SOX4 (+40879), PRL (+662879)         |
| chr5  | 169122694 | 169123195 | FOX11 (-409956), DOCK2 (+58694)      |
| chrX  | 47566094  | 47567689  | ZNF81 (-129409), UXT (-48376)        |
| chr5  | 39755442  | 39756142  | PTGER4 (-923808), DAB2 (-330520)     |
| chr9  | 137708067 | 137709938 | FCN2 (-63655), COL5A1 (+175383)      |
| chr10 | 63996256  | 63996757  | RTKN2 (+31959), ARID5B (+335448)     |
| chr10 | 14049803  | 14050834  | FRMD4A (+322564), PRPF18 (+421392)   |
| chr6  | 88355078  | 88355579  | ORC3 (+55476), AKIRIN2 (+56598)      |
| chr4  | 153473287 | 153478510 | FBXW7 (-18646), TMEM154 (+125418)    |
| chr17 | 37967736  | 37972160  | IKZF3 (+50493), GRB7 (+74924)        |
| chr16 | 21550269  | 21553486  | NPIP3 (-120800), METTL9 (-58919)     |
| chr6  | 135679767 | 135680268 | AHI1 (+138865), MYB (+177565)        |
| chrX  | 47566239  | 47568023  | ZNF81 (-129170), UXT (-48615)        |
| chr10 | 64376485  | 64381832  | ADO (-185357), ZNF365 (+245208)      |
| chr1  | 193425239 | 193433915 | B3GALT2 (-273793)                    |
| chr12 | 27974000  | 27976085  | KLHL42 (+42090), PTHLH (+149860)     |
| chr2  | 238209083 | 238210134 | COL6A3 (+113409), COPS8 (+215654)    |
| chr2  | 43114011  | 43116370  | HAAO (-95459), ZFP36L2 (+338557)     |
| chr4  | 146219434 | 146223218 | SMAD1 (-182637), OTUD4 (-120494)     |
| chr14 | 25161685  | 25165346  | GZMB (-60043), STXBP6 (+355987)      |
| chrX  | 1619728   | 1620229   | ASMTL (-48213), P2RY8 (+36021)       |
| chr1  | 44261180  | 44262993  | ARTN (-136905), ST3GAL3 (+88869)     |
| chr1  | 195926753 | 195928648 | KCNT2 (+649798)                      |
| chr1  | 231107270 | 231110762 | C1orf198 (-104617), ARV1 (-5779)     |
| chr21 | 28640489  | 28641405  | ADAMTS5 (-302115)                    |
| chr16 | 53634382  | 53635191  | AKTIP (-97624), RRGIP1L (+102971)    |
| chr1  | 86618400  | 86623077  | ZNHIT6 (-446638), COL24A1 (+1707)    |
| chr2  | 204717570 | 204740329 | CTLA4 (-3559)                        |
| chr5  | 50147638  | 50153531  | ISL1 (-528336), PARP8 (+187813)      |
| chr3  | 113547530 | 113550794 | GRAMD1C (-8103), ATP6V1A (+83296)    |
| chr4  | 122073131 | 122078849 | NDNF (-82317), TNIP3 (+72631)        |
| chr1  | 113588707 | 113590588 | SLC16A1 (-90963), LRIG2 (-26183)     |
| chr21 | 35705580  | 35706365  | KCNE2 (-30350), SLC5A3 (+260103)     |
| chr3  | 141530473 | 141530974 | ATP1B3 (-64732), GRK7 (+33734)       |
| chr13 | 49379051  | 49379997  | FNDC3A (-170524), CYSLTR2 (+98573)   |
| chr6  | 2936620   | 2938475   | SERPINB9 (-34034), SERPINB6 (+24013) |
| chr4  | 158971566 | 158974785 | FAM198B (+121026), GRIA2 (+831306)   |
| chr22 | 27529921  | 27531264  | CRYBA4 (+512665), MN1 (+666893)      |

|       |           |           |                                     |
|-------|-----------|-----------|-------------------------------------|
| chr10 | 5637496   | 5638558   | ASB13 (+70514), CALML3 (+71103)     |
| chr6  | 1285806   | 1287824   | EXOC2 (-593704), FOXQ1 (-25860)     |
| chr21 | 30820912  | 30823317  | BACH1 (+150378), GRIK1 (+490115)    |
| chr3  | 47078901  | 47080714  | CCDC12 (-56336), SETD2 (+125649)    |
| chr12 | 31838801  | 31841066  | METTL20 (+27312), H3F3C (+105241)   |
| chr2  | 97258889  | 97263356  | KANSL3 (+42923), ARID5A (+58637)    |
| chr9  | 94942389  | 94944339  | SPTLC1 (-65706), IARS (+112618)     |
| chr11 | 63318524  | 63322482  | HRASLS2 (+10352), RARRES3 (+16210)  |
| chr22 | 27005525  | 27007284  | TPST2 (-20278), CRYBB1 (+7647)      |
| chr2  | 204797118 | 204809378 | PARD3B (-607475), ICOS (+1777)      |
| chr10 | 72335146  | 72340308  | PRF1 (+24804), PALD1 (+99150)       |
| chr1  | 198154501 | 198163540 | NEK7 (+32928), ATP6V1G3 (+351054)   |
| chr16 | 30467892  | 30471399  | ITGAL (-14333), SEPHS2 (-12598)     |
| chr4  | 40266392  | 40268748  | CHRNA9 (-69776), RHOH (+69043)      |
| chr16 | 79305161  | 79306750  | MAF (+328655)                       |
| chr1  | 205267211 | 205268418 | NUAK2 (+23068), TMCC2 (+70511)      |
| chr5  | 95872397  | 95874785  | CAST (-124350), PCSK1 (-104607)     |
| chr17 | 68402021  | 68402522  | KCNJ2 (+236596)                     |
| chr3  | 39335157  | 39337960  | CCR8 (-34638), CX3CR1 (-13333)      |
| chr13 | 30508124  | 30513593  | UBL3 (-86038), KATNAL1 (+370762)    |
| chr22 | 42426418  | 42428279  | WBP2NL (+32557), NAGA (+39485)      |
| chr1  | 198636899 | 198637400 | PTPRC (+28980)                      |
| chr5  | 178729585 | 178732387 | ADAMTS2 (+41445), ZNF354C (+243570) |
| chr8  | 144272207 | 144273414 | LY6H (-30683), GPIHBP1 (-22257)     |
| chr12 | 75864855  | 75867124  | GLIPR1 (-8470), GLIPR1L2 (+81140)   |
| chr12 | 92601209  | 92604681  | CLLU1 (-214790), BTG1 (-63272)      |
| chr16 | 53482583  | 53495406  | RBL2 (+20663), AKTIP (+48168)       |
| chr14 | 103270957 | 103275162 | AMN (-115933), TRAF3 (+29247)       |
| chr10 | 64396684  | 64398727  | ADO (-166810), ZNF365 (+263755)     |
| chr12 | 42490672  | 42492788  | GXYLT1 (+46951), PDZRN4 (+909480)   |
| chr1  | 172323391 | 172323892 | PIGC (+89584), DNM3 (+513021)       |
| chr3  | 142888556 | 142891052 | CHST2 (+51631), SLC9A9 (+677569)    |
| chr1  | 160678260 | 160678920 | SLAMF1 (-61505), CD48 (+3051)       |
| chr17 | 3613256   | 3616851   | P2RX5 (-15356), GSG2 (-12157)       |
| chr6  | 149530548 | 149537615 | TAB2 (-108106), UST (+465618)       |
| chr13 | 100863151 | 100863652 | PCCA (+122065), GGACT (+372849)     |
| chr3  | 111333706 | 111337219 | PLCXD2 (-58306), ZBED2 (-21173)     |
| chr9  | 90937264  | 90938963  | CDK20 (-348447), SPIN1 (-65220)     |
| chr9  | 134053288 | 134057519 | PPAPDC3 (-109677), NUP214 (+54456)  |
| chr1  | 245425288 | 245428471 | KIF26B (+108593)                    |
| chr21 | 46298633  | 46302403  | PTTG1IP (-6766), ITGB2 (+48270)     |
| chr9  | 86907369  | 86909135  | SLC28A3 (+47346), RMI1 (+312539)    |
| chr10 | 114128357 | 114130589 | ACSL5 (-6483), TECTB (+85980)       |
| chr18 | 41515317  | 41516272  | SETBP1 (-745068), SYT4 (-658180)    |
| chr10 | 88170037  | 88174476  | GRID1 (-46022), WAPAL (+109315)     |
| chr22 | 32312579  | 32314626  | YWHAH (-26844), DEPDC5 (+162765)    |
| chr1  | 171086345 | 171086846 | FMO6P (-20645), FMO3 (+26578)       |
| chr13 | 37708202  | 37709383  | CSNK1A1L (-28990), POSTN (+464188)  |
| chr2  | 135425915 | 135429812 | TMEM163 (+48706), MGAT5 (+550111)   |
| chrX  | 3181319   | 3181820   | MXRA5 (+83112), ARSF (+222058)      |
| chr6  | 75381392  | 75382084  | COL12A1 (+534029), CD109 (+975911)  |
| chr11 | 46268446  | 46272028  | PHF21A (-127676), CREB3L1 (-28975)  |
| chr1  | 169648500 | 169681623 | SELP (-65712), SELL (+15777)        |
| chr6  | 38355339  | 38355840  | BTBD9 (+252110), ZFAND3 (+568315)   |
| chr18 | 46392966  | 46396767  | SMAD7 (+82214), CTIF (+329338)      |
| chr4  | 36255828  | 36259347  | DTHD1 (-28056), ARAP2 (-11457)      |

|       |           |           |                                           |
|-------|-----------|-----------|-------------------------------------------|
| chr10 | 25182505  | 25184729  | ARHGAP21 (-171020), PRTFDC1 (+57916)      |
| chr12 | 58894581  | 58899699  | LRIG3 (+417163), XRCC6BP1 (+561780)       |
| chr2  | 183363987 | 183364846 | PDE1A (+22887), PPP1R1C (+513813)         |
| chr4  | 148044549 | 148045222 | EDNRA (-357198), POU4F2 (+484841)         |
| chr2  | 36466870  | 36469468  | CRIM1 (-114900)                           |
| chr1  | 84154878  | 84156885  | TTLL7 (+308933)                           |
| chr11 | 122726449 | 122728538 | CRTAM (+18286), BSX (+124934)             |
| chr6  | 80926808  | 80927582  | BCKDHB (+110831)                          |
| chr11 | 127905087 | 127912901 | ETS1 (+548443)                            |
| chr1  | 77737107  | 77738299  | PIGK (-52592), AK5 (-10033)               |
| chr7  | 40259859  | 40263266  | C7orf10 (+86988)                          |
| chr10 | 127837312 | 127837813 | ADAM12 (+239461), FANK1 (+252455)         |
| chr5  | 100187790 | 100191537 | STSIA4 (+49306), FAM174A (+318655)        |
| chr22 | 24183333  | 24183834  | DERL3 (-2391)                             |
| chr4  | 39028702  | 39035663  | TMEM156 (+1858), FAM114A1 (+162746)       |
| chr12 | 122727077 | 122732063 | DIABLO (-17489), ENSG00000256861 (+21400) |
| chr3  | 187710857 | 187713427 | BCL6 (-248627), LPP (-218579)             |
| chr21 | 36883650  | 36884949  | RUNX1 (-462659), SETD4 (+548259)          |
| chr8  | 129553851 | 129554352 | TMEM75 (-593511)                          |
| chr1  | 93437189  | 93448413  | MTF2 (-101994), FAM69A (-15744)           |
| chr7  | 36814443  | 36821530  | AOAH (-53834), ELMO1 (+670865)            |
| chr13 | 30528430  | 30528931  | UBL3 (-103860), KATNAL1 (+352940)         |
| chr1  | 145500860 | 145503901 | RBM8A (-5217), LIX1L (+25296)             |
| chr16 | 14602593  | 14606595  | PARN (+119530), MKL2 (+431449)            |
| chr6  | 105956780 | 105959583 | PRDM1 (-576013), PREP (-107223)           |
| chr8  | 32918914  | 32919415  | FUT10 (+411775), NRG1 (+513437)           |
| chr3  | 71550666  | 71556241  | FOXP1 (-373466), EIF4E3 (+221072)         |
| chr12 | 65549507  | 65551461  | WIF1 (-35138), LEMD3 (-12867)             |
| chr2  | 26014955  | 26022324  | DTNB (-122137), ASXL2 (+82745)            |
| chr8  | 122100923 | 122101424 | SNTB1 (-275661), HAS2 (+552456)           |
| chr3  | 114023033 | 114030125 | TIGIT (+16630), ZBTB20 (+75909)           |
| chr1  | 211525154 | 211528889 | TRAF5 (+26843), RD3 (+139237)             |
| chr13 | 61001070  | 61002873  | TDRD3 (+30545)                            |
| chr7  | 90793155  | 90795995  | FZD1 (-99208), CDK14 (+455863)            |
| chr22 | 44597790  | 44598291  | PARVG (+29205), KIAA1644 (+110690)        |
| chr11 | 85411610  | 85412111  | CCDC89 (-14541), SYTL2 (+25650)           |
| chr12 | 105430450 | 105433891 | SLC41A2 (-109738), ALDH1L2 (+46184)       |
| chr4  | 86623821  | 86624322  | ARHGAP24 (+227805), MAPK10 (+657144)      |
| chr2  | 12267013  | 12268605  | TRIB2 (-589206), LPIN1 (+450088)          |
| chr10 | 102065611 | 102068279 | BLOC1S2 (-20476), PKD2L1 (+23298)         |
| chr6  | 149553685 | 149555984 | TAB2 (-87353), UST (+486371)              |
| chr13 | 42079881  | 42080382  | RGCC (+48437), VWA8 (+455088)             |
| chr8  | 29223880  | 29225318  | DUSP4 (-16414), TMEM66 (+716124)          |
| chr1  | 167414539 | 167418688 | CD247 (+71161), POU2F1 (+226548)          |
| chr4  | 40237273  | 40250444  | CHRNA9 (-93487), RHOH (+45332)            |
| chrX  | 13068166  | 13072858  | FAM9C (-7791), ATXN3L (+268006)           |
| chr21 | 36442384  | 36447145  | RUNX1 (-23124), SETD4 (+987794)           |
| chr20 | 25070438  | 25073193  | ENTPD6 (-104540), VSX1 (-8820)            |
| chr5  | 79227603  | 79236158  | MTX3 (+55187), CMYA5 (+246181)            |
| chr10 | 63994252  | 63994753  | RTKN2 (+33963), ARID5B (+333444)          |
| chr9  | 37144575  | 37147653  | GRHRP (-276549), ZCCHC7 (+25578)          |
| chr20 | 50647583  | 50649524  | SALL4 (-229495), ZFP64 (+159971)          |
| chr12 | 12111144  | 12111645  | BCL2L14 (-112478), ETV6 (+308607)         |
| chr3  | 101655124 | 101655973 | ZPLD1 (-498310), NFKBIZ (+87191)          |
| chr16 | 48491610  | 48493329  | SIAH1 (-92658), N4BP1 (+151650)           |
| chr1  | 79115590  | 79116240  | IFI44 (+399)                              |

|       |           |           |                                       |
|-------|-----------|-----------|---------------------------------------|
| chr12 | 127653587 | 127654263 | NONE                                  |
| chr3  | 25502386  | 25502887  | RARB (+32835), TOP2B (+203353)        |
| chr3  | 141025034 | 141027838 | ZBTB38 (-80218), ACPL2 (+75766)       |
| chr1  | 192499414 | 192499915 | RGS1 (-45192), RGS21 (+213543)        |
| chr6  | 149414489 | 149417552 | TAB2 (-226167), UST (+347557)         |
| chr14 | 71338304  | 71339812  | MAP3K9 (-62807), PCNX (-35064)        |
| chr8  | 19573194  | 19579059  | CSGALNACT1 (-116121), INTS10 (-98524) |
| chr10 | 43794008  | 43796667  | RASGEF1A (-90706), FXYD4 (-71752)     |
| chr12 | 128139616 | 128142321 | TMEM132C (-610979)                    |
| chr8  | 95176472  | 95178961  | CDH17 (+43098), PDP1 (+248542)        |
| chr15 | 61011517  | 61015108  | RORA (-93651)                         |
| chr7  | 17571530  | 17573830  | AHR (+234434), SNX13 (+407437)        |
| chr9  | 78416032  | 78419995  | PCSK5 (-87546), OSTF1 (+714555)       |
| chr1  | 192127624 | 192128125 | RGS18 (+288)                          |
| chr11 | 131934351 | 131934852 | NTM (+153246), OPCML (+878964)        |
| chr10 | 8285306   | 8288680   | GATA3 (+190337)                       |
| chr9  | 25710547  | 25711048  | NONE                                  |
| chr1  | 86620223  | 86621494  | ZNHIT6 (-446758), COL24A1 (+1587)     |
| chr11 | 122565176 | 122572876 | CRTAM (-140182), UBASH3B (+42643)     |
| chr10 | 31026092  | 31026593  | LYZL2 (-107652), ZNF438 (+294523)     |
| chr12 | 58895803  | 58896304  | LRIG3 (+418249), XRCC6BP1 (+560694)   |
| chr2  | 196512672 | 196516809 | SLC39A10 (-6730)                      |
| chr5  | 80301838  | 80305345  | CKMT2 (-225551), RASGRF2 (+47101)     |
| chr1  | 157075195 | 157075696 | ETV3L (-5846), ETV3 (+32713)          |
| chr5  | 33690367  | 33692035  | ADAMTS12 (+201096), TARS (+250130)    |
| chr16 | 86618302  | 86620805  | FOXL1 (+7439), FBXO31 (+797809)       |
| chr10 | 6532283   | 6538050   | PRKCQ (+87096), PFKFB3 (+290273)      |
| chr3  | 154782910 | 154783411 | GPR149 (-635657), MME (-14275)        |
| chr6  | 45416613  | 45417114  | SUPT3H (-71194), CLIC5 (+631268)      |
| chr2  | 113455666 | 113460554 | NT5DC4 (-20953), SLC20A1 (+54676)     |
| chr14 | 66392553  | 66396973  | GPHN (-579362), FUT8 (+517453)        |
| chr7  | 150251621 | 150255945 | GIMAP4 (-10582), GIMAP7 (+41865)      |
| chr1  | 100918875 | 100919376 | GPR88 (-84567), CDC14A (+101079)      |
| chr7  | 142045248 | 142045749 | PRSS1 (-411831), PRSS58 (-87652)      |
| chr11 | 104746604 | 104749060 | PDGFD (-712997), CASP12 (+21328)      |
| chr7  | 17694083  | 17695883  | SNX13 (+285134), AHR (+356737)        |
| chr15 | 90918636  | 90922483  | IQGAP1 (-10890), ZNF774 (+25083)      |
| chr2  | 165837611 | 165838112 | SLC38A11 (-25866), SCN3A (+222691)    |
| chr14 | 98459238  | 98462765  | NONE                                  |
| chr8  | 24240544  | 24245901  | ADAM7 (-55316), ADAMDEC1 (+1425)      |
| chrX  | 123474950 | 123483691 | SH2D1A (-873)                         |
| chr9  | 128283378 | 128285411 | MAPKAP1 (+185118), GAPVD1 (+260284)   |
| chr1  | 245949696 | 245951042 | KIF26B (+632082), SMYD3 (+720150)     |
| chr19 | 6640219   | 6642891   | CD70 (-50392), TNFSF14 (+29044)       |
| chr14 | 51278564  | 51282023  | SAV1 (-145245), NIN (+17545)          |
| chr7  | 38388410  | 38405860  | STARD3NL (+179311), AMPH (+274032)    |
| chr2  | 65033985  | 65035232  | SLC1A4 (-181926), SERTAD2 (-153562)   |
| chr3  | 122328141 | 122329327 | PARP14 (-70731), PARP15 (+32285)      |
| chr6  | 130504279 | 130506291 | L3MBTL3 (+170441), SAMD3 (+181285)    |
| chr1  | 198503297 | 198504999 | ATP6V1G3 (+5927), NEK7 (+378055)      |
| chr5  | 52039857  | 52040358  | ITGA1 (-43622)                        |
| chr18 | 41468254  | 41469058  | SETBP1 (-792207), SYT4 (-611041)      |
| chr5  | 110558796 | 110574556 | CAMK4 (+6892), STARD4 (+281532)       |
| chr16 | 56293689  | 56298363  | GNAO1 (+70138), AMFR (+163424)        |
| chr2  | 172066855 | 172068571 | TLK1 (-50370), METTL8 (+222883)       |
| chr10 | 4022066   | 4022567   | AKR1E2 (-846129), KLF6 (-194850)      |



|       |           |           |                                      |
|-------|-----------|-----------|--------------------------------------|
| chr18 | 53455671  | 53458744  | TCF4 (-154023), TXNL1 (+848668)      |
| chr6  | 33872639  | 33873140  | MLN (-101102), GRM4 (+228553)        |
| chr15 | 39188201  | 39188843  | THBS1 (-684772), RASGRP1 (-331515)   |
| chr2  | 179910584 | 179915140 | TTN (-240712), CCDC141 (+1924)       |
| chr4  | 158971443 | 158974766 | FAM198B (+121097), GRIA2 (+831235)   |
| chr10 | 63512510  | 63513011  | TMEM26 (-299553), ARID5B (-148298)   |
| chr20 | 30314941  | 30315751  | BCL2L1 (-4645)                       |
| chr1  | 112048852 | 112049353 | ADORA3 (-2993)                       |
| chr2  | 172179098 | 172185108 | TLK1 (-164760), METTL8 (+108493)     |
| chr21 | 29836910  | 29837538  | N6AMT1 (+420469)                     |
| chr3  | 111313156 | 111313657 | ZBED2 (+883)                         |
| chr1  | 7995498   | 8003823   | UTS2 (-86170), TNFRSF9 (+1265)       |
| chr12 | 91742056  | 91743501  | DCN (-165879), BTG1 (+796894)        |
| chr10 | 52566804  | 52569360  | SGMS1 (-184339), A1CF (+77353)       |
| chr4  | 1260693   | 1262289   | MAEA (-22148), CTBP1 (-18566)        |
| chr21 | 27566260  | 27569201  | APP (-24759), CYR1 (+377872)         |
| chr6  | 22326421  | 22329936  | PRL (-30449)                         |
| chr6  | 26360629  | 26362388  | BTN3A2 (-3950)                       |
| chr19 | 54538025  | 54540016  | VSTM1 (+28186), CACNG6 (+43479)      |
| chr1  | 117336939 | 117337440 | PTGFRN (-115489), CD2 (+40183)       |
| chr21 | 32815036  | 32820831  | KRTAP19-8 (-407139), TIAM1 (+113356) |
| chr13 | 31347445  | 31349654  | MEDAG (-131778), ALOX5AP (+38905)    |
| chr14 | 22538330  | 22540384  | OR4E2 (+406060), DAD1 (+518818)      |
| chr20 | 57694968  | 57700405  | SLMO2 (-79723), ZNF831 (-68388)      |
| chr6  | 45461561  | 45465275  | SUPT3H (-117748), CLIC5 (+584714)    |
| chr14 | 76307758  | 76310189  | TGFB3 (+138560), TTL5 (+181353)      |
| chr11 | 94642044  | 94645128  | CWC15 (+63190), AMOTL1 (+142049)     |
| chr13 | 94964199  | 94964700  | DCT (+167486)                        |
| chr4  | 114658843 | 114659344 | CAMK2D (+23130), ANK2 (+688262)      |
| chr3  | 139026423 | 139028847 | COPB2 (+80939), MRPS22 (+302987)     |
| chr10 | 122182587 | 122183225 | PPAPDC1A (-33560), SEC23IP (+530683) |
| chr2  | 144003584 | 144022067 | ARHGAP15 (+125943)                   |
| chr7  | 37353944  | 37356472  | AOAH (-591055), ELMO1 (+133644)      |
| chr17 | 37972339  | 37978970  | IKZF3 (+44786), GRB7 (+80631)        |
| chr12 | 47582484  | 47588729  | AMIGO2 (-111959), RPAP3 (+514237)    |
| chr6  | 81135390  | 81136228  | BCKDHB (+319445)                     |
| chr21 | 46037795  | 46040003  | KRTAP10-9 (-8141), KRTAP10-8 (+6903) |
| chr6  | 105998104 | 106001982 | PRDM1 (-534152), PREP (-149084)      |
| chr10 | 17251622  | 17252594  | VIM (-18150), TRDMT1 (-8427)         |
| chr10 | 72251902  | 72256606  | PALD1 (+15677), PRF1 (+108277)       |
| chr4  | 169672033 | 169674950 | PALLD (+255237), CBR4 (+257917)      |
| chr16 | 73188403  | 73188904  | ZFH3 (-106380)                       |
| chr6  | 75286630  | 75289960  | COL12A1 (+627472), CD109 (+882468)   |
| chr12 | 91434374  | 91435032  | EPYC (-35900), KERA (+17057)         |
| chr10 | 72421078  | 72425900  | PRF1 (-60958), ADAMTS14 (-9070)      |
| chr4  | 6199042   | 6203092   | CRMP1 (-306282), JAKMIP1 (+1215)     |
| chr8  | 126536962 | 126541939 | TRIB1 (+96888)                       |
| chr3  | 46253765  | 46256843  | CCR3 (-28568), CCR1 (-5417)          |
| chr2  | 102953422 | 102953923 | IL18R1 (-18716), IL1RL1 (+25711)     |
| chr19 | 31867898  | 31870429  | ZNF507 (-967336), TSHZ3 (-28711)     |
| chr1  | 33265477  | 33265978  | SYNC (-97008), S100BPB (-17428)      |
| chr22 | 28534500  | 28544558  | PITPNB (-224273), TTC28 (+536324)    |
| chr3  | 136602483 | 136606781 | IL20RB (-72075), NCK1 (+23582)       |
| chr6  | 38229506  | 38230257  | BTBD9 (+377818), ZFAND3 (+442607)    |
| chr4  | 1194193   | 1199050   | SPON2 (-29961), CTBP1 (+46303)       |
| chr19 | 51943246  | 51945891  | SIGLEC10 (-23617), SIGLEC8 (+17139)  |

|       |           |           |                                      |
|-------|-----------|-----------|--------------------------------------|
| chr6  | 144375663 | 144377688 | PLAGL1 (-86561), SF3B5 (+40078)      |
| chr3  | 56758047  | 56761482  | CCDC66 (+168564), ARHGFE3 (+353571)  |
| chr6  | 45583905  | 45588871  | SUPT3H (-240718), CLIC5 (+461744)    |
| chr1  | 108367665 | 108374118 | VAV3 (+136874), NTNG1 (+687450)      |
| chr6  | 119116980 | 119118230 | ASF1A (-97779), CEP85L (-86367)      |
| chr1  | 23926854  | 23930250  | RPL11 (-89717), ID3 (-42267)         |
| chr10 | 6965816   | 6972590   | PRKCQ (-346940), SFMBT2 (+482100)    |
| chr8  | 121785049 | 121794691 | SNTB1 (+35643), MTBP (+332204)       |
| chr11 | 108740812 | 108742226 | C11orf87 (-551327), DDX10 (+205767)  |
| chr20 | 30314480  | 30316371  | BCL2L1 (-4725)                       |
| chr20 | 51108653  | 51111657  | TSHZ2 (-478791), ZFP64 (-301630)     |
| chr11 | 118569609 | 118570110 | TREH (-19479), DDX6 (+91985)         |
| chr5  | 102157611 | 102160715 | SLCO6A1 (-324443), PAM (-42551)      |
| chr6  | 143220989 | 143229722 | HIVEP2 (+40982), GPR126 (+602290)    |
| chr10 | 63156529  | 63158398  | RHOBTB1 (-453459), TMEM26 (+55744)   |
| chr7  | 36774790  | 36778078  | AOAH (-12281), ELMO1 (+712418)       |
| chr14 | 22855905  | 22858918  | DAD1 (+200763), OR4E2 (+724115)      |
| chr1  | 246018902 | 246025413 | SMYD3 (+648361), KIF26B (+703871)    |
| chr11 | 102752050 | 102754710 | MMP3 (-38846), MMP13 (+73083)        |
| chr2  | 69922085  | 69922832  | AAK1 (-51610), ANXA4 (-46647)        |
| chr14 | 76181747  | 76182565  | TLL5 (+54535), TGF3 (+265378)        |
| chrX  | 1671403   | 1675044   | AKAP17A (-37262), P2RY8 (-17224)     |
| chr3  | 146683396 | 146692577 | PLSCR1 (-425336), ZIC4 (+434084)     |
| chr1  | 169332609 | 169333110 | BLZF1 (-4348), NME7 (+4345)          |
| chr7  | 81038840  | 81039717  | SEMA3C (-490612), HGF (+360235)      |
| chr11 | 15178875  | 15180281  | INSC (+45608)                        |
| chr2  | 189757170 | 189759529 | COL3A1 (-80696), GULP1 (+600791)     |
| chr1  | 192496634 | 192500988 | RGS1 (-46046), RGS21 (+212689)       |
| chrX  | 19760952  | 19772098  | MAP3K15 (-233146), SH3KBP1 (+139194) |
| chr1  | 185785717 | 185787328 | PRG4 (-478888), HMCN1 (+82840)       |
| chr13 | 30692708  | 30693710  | UBL3 (-268388), KATNAL1 (+188412)    |
| chr3  | 125028919 | 125030773 | SLC12A8 (-99603), ZNF148 (+64352)    |
| chr4  | 13892871  | 13895087  | BOD1L1 (-264632)                     |
| chr18 | 10213099  | 10214465  | APCDD1 (-240843), VAPA (+299723)     |
| chr7  | 17499904  | 17509150  | AHR (+166281), SNX13 (+475590)       |
| chr17 | 65444653  | 65453272  | NOL11 (-264986), PIPN1 (+74692)      |
| chr2  | 191703131 | 191703784 | GLS (-42095), NAB1 (+189499)         |
| chr19 | 30321172  | 30324226  | URI1 (-110459), CCNE1 (+19894)       |
| chr2  | 238192615 | 238193116 | COL6A3 (+130152), COPS8 (+198911)    |
| chr5  | 178913521 | 178914022 | ADAMTS2 (-141341), RUFY1 (-63787)    |
| chr2  | 216523491 | 216525240 | FN1 (-223471), MREG (+353980)        |
| chr2  | 189766650 | 189768519 | COL3A1 (-71461), GULP1 (+610026)     |
| chr2  | 238173454 | 238174161 | COL6A3 (+149210), COPS8 (+179853)    |
| chr13 | 37767525  | 37768026  | CSNK1A1L (-87973), POSTN (+405205)   |
| chr14 | 93029280  | 93030725  | RIN3 (+49885), LGMN (+185021)        |
| chr3  | 99751882  | 99752759  | FILIP1L (+81036), COL8A1 (+395002)   |
| chr5  | 95481548  | 95482339  | ELL2 (-184169), PCSK1 (+287040)      |
| chr6  | 37104628  | 37105945  | PIM1 (-32692), COX6A1P2 (+92680)     |
| chr12 | 92602854  | 92603959  | CLU1 (-214328), BTG1 (-63734)        |
| chr2  | 200903686 | 200904187 | SPATS2L (-266937), TYW5 (-83478)     |
| chr16 | 30484117  | 30484618  | ITGAL (+389)                         |
| chr7  | 128580333 | 128581232 | IRF5 (+2789), TNPO3 (+114185)        |
| chr17 | 30895460  | 30895961  | CDK5R1 (+82074), MYO1D (+308484)     |
| chr20 | 50476394  | 50477816  | SALL4 (-58046), ZFP64 (+331420)      |
| chr17 | 46561500  | 46562205  | SKAP1 (-54301), HOXB1 (+46506)       |
| chr2  | 8226662   | 8227163   | ID2 (-592062)                        |

|       |           |           |                                      |
|-------|-----------|-----------|--------------------------------------|
| chr4  | 156811047 | 156811959 | ASIC5 (-24078), TDO2 (-13344)        |
| chr21 | 36724851  | 36726049  | RUNX1 (-303809), SETD4 (+707109)     |
| chr2  | 178294170 | 178294671 | AGPS (+37049), TTC30B (+123321)      |
| chr5  | 111283166 | 111285644 | STARD4 (-436197), NREP (+28223)      |
| chr6  | 24951382  | 24951883  | LRRC16A (-328023), FAM65B (-40438)   |
| chr20 | 1650364   | 1650865   | SIRPA (-225327), SIRPG (-12190)      |
| chr9  | 15725315  | 15726023  | PSIP1 (-214652)                      |
| chr15 | 39006601  | 39007234  | THBS1 (-866376), RASGRP1 (-149911)   |
| chr1  | 198466677 | 198467178 | ATP6V1G3 (+43147), NEK7 (+340835)    |
| chr1  | 246036909 | 246038402 | SMYD3 (+632863), KIF26B (+719369)    |
| chr6  | 1145629   | 1146306   | EXOC2 (-452857), FOXQ1 (-166707)     |
| chr2  | 28351757  | 28352258  | FOSL2 (-263717), RBKS (-238043)      |
| chr20 | 58630773  | 58631450  | CDH26 (+97630)                       |
| chr7  | 113687276 | 113688827 | FOXP2 (-367000), PPP1R3A (-128932)   |
| chr9  | 78054857  | 78055358  | PCSK5 (-450452), OSTF1 (+351649)     |
| chr2  | 189591710 | 189592555 | COL3A1 (-246913), GULP1 (+434574)    |
| chr18 | 33018126  | 33018627  | ZNF396 (-61076), INO80C (+59530)     |
| chr1  | 192513949 | 192514450 | RGS1 (-30657), RGS21 (+228078)       |
| chr15 | 51118472  | 51118973  | AP4E1 (-82147), SPPL2A (-60718)      |
| chr7  | 17701643  | 17703028  | SNX13 (+277781), AHR (+364090)       |
| chr18 | 6876936   | 6877842   | ARHGAP28 (+42915), LAMA1 (+240424)   |
| chr8  | 82139216  | 82139717  | PAG1 (-115164), FABP5 (-53131)       |
| chr2  | 12997082  | 12997717  | TRIB2 (+140385)                      |
| chr17 | 37294389  | 37296512  | PLXDC1 (+12451), LASP1 (+269339)     |
| chr12 | 109299781 | 109300282 | DAO (+26226), SVOP (+72407)          |
| chr1  | 198898995 | 198899657 | PTPRC (+291156)                      |
| chr2  | 192501703 | 192503615 | NABP1 (-40599), MYO1B (+392544)      |
| chr6  | 106606937 | 106607438 | PRDM1 (+72993), ATG5 (+166478)       |
| chr15 | 55545356  | 55545857  | RSL24D1 (-56342), RAB27A (+16985)    |
| chr5  | 60614726  | 60616475  | SMIM15 (-157300), ZSWIM6 (-12499)    |
| chr13 | 38112742  | 38114065  | CSNK1A1L (-433601), POSTN (+59577)   |
| chr2  | 216525884 | 216526589 | FN1 (-225342), MREG (+352109)        |
| chr6  | 169433529 | 169437138 | THBS2 (+218805), SMOC2 (+593503)     |
| chr7  | 65263637  | 65264138  | VKORC1L1 (-74366), ZNF92 (+425176)   |
| chr1  | 160680726 | 160681401 | CD48 (+577)                          |
| chr5  | 134772309 | 134776032 | H2AFY (-38859), C5orf20 (+8867)      |
| chr4  | 156559393 | 156562959 | MAP9 (-263054), GUCY1A3 (-27174)     |
| chr2  | 232107295 | 232107796 | B3GNT7 (-152708), HTR2B (-117714)    |
| chr4  | 38372690  | 38373191  | KLF3 (-292876), PTTG2 (+410885)      |
| chr10 | 4169790   | 4170291   | AKR1E2 (-698405), KLF6 (-342574)     |
| chr4  | 156561547 | 156562831 | MAP9 (-264067), GUCY1A3 (-26161)     |
| chr4  | 38374477  | 38375671  | KLF3 (-290743), PTTG2 (+413018)      |
| chr9  | 21575610  | 21577176  | MTAP (-226149), IFNE (-94081)        |
| chr4  | 13890236  | 13890737  | BOD1L1 (-261140)                     |
| chr17 | 16808493  | 16808994  | ZNF624 (-251577), TNFRSF13B (+66658) |
| chr4  | 54727769  | 54729445  | LNX1 (-270824), CHIC2 (+202250)      |
| chr6  | 149355479 | 149355980 | TAB2 (-286458), UST (+287266)        |
| chrX  | 1804076   | 1804577   | ASMT (+70433), ZBED1 (+614681)       |
| chr11 | 13237542  | 13238746  | ARNTL (-61201), TEAD1 (+471556)      |
| chr1  | 204482545 | 204483327 | MDM4 (-2575)                         |
| chr7  | 142937296 | 142937943 | GSTK1 (-22929), TAS2R40 (+18490)     |
| chr7  | 94045143  | 94053161  | CASD1 (-89958), COL1A2 (+25279)      |
| chr2  | 189676180 | 189677737 | COL3A1 (-162087), GULP1 (+519400)    |
| chr20 | 55639754  | 55642498  | BMP7 (+200558), TFAP2C (+436768)     |
| chr10 | 5627207   | 5627834   | CALML3 (+60597), ASB13 (+81020)      |
| chr4  | 146199782 | 146200964 | SMAD1 (-203590), OTUD4 (-99541)      |

|       |           |           |                                             |
|-------|-----------|-----------|---------------------------------------------|
| chr2  | 12842544  | 12843494  | TRIB2 (-13996)                              |
| chr14 | 81236183  | 81236874  | DIO2 (-558686), CEP128 (+171600)            |
| chr7  | 90676366  | 90677411  | FZD1 (-216894), CDK14 (+338177)             |
| chr20 | 55449795  | 55450296  | TFAP2C (+245688), BMP7 (+391638)            |
| chr7  | 17718050  | 17721657  | SNX13 (+260263), AHR (+381608)              |
| chr17 | 10151770  | 10152271  | GAS7 (-50153), MYH13 (+124426)              |
| chr5  | 67410709  | 67411210  | CD180 (-918333), PIK3R1 (-100588)           |
| chr11 | 105052248 | 105052749 | GRIA4 (-428301), CARD18 (-42046)            |
| chr1  | 116323294 | 116326069 | CASQ2 (-13280), NHLH2 (+61856)              |
| chr2  | 8442431   | 8443204   | ID2 (-376157)                               |
| chr7  | 89807911  | 89808412  | STEAP2 (-32838), STEAP1 (+24473)            |
| chr5  | 111016712 | 111018570 | STARD4 (-169433), NREP (+294987)            |
| chr2  | 189865035 | 189865668 | COL3A1 (+26306), COL5A2 (+179253)           |
| chr14 | 99521470  | 99521971  | BCL11B (+215844)                            |
| chr2  | 28353184  | 28353818  | FOSL2 (-262224), RBKS (-239536)             |
| chr21 | 33491711  | 33492212  | MIS18A (+159418), HUNK (+246334)            |
| chr11 | 128778509 | 128779505 | C11orf45 (-3415)                            |
| chr2  | 121058084 | 121058724 | INHBB (-45315), RALB (+48070)               |
| chr11 | 48022536  | 48023037  | OR4B1 (-215557), PTPRJ (+20674)             |
| chr2  | 225276365 | 225278672 | FAM124B (-10768), CUL3 (+172546)            |
| chr2  | 33754835  | 33755499  | RASGRP3 (+53872)                            |
| chr13 | 95919431  | 95919932  | SOX21 (-555293), ABCC4 (+34001)             |
| chr13 | 46753519  | 46754786  | CPB2 (-74992), LCP1 (+31330)                |
| chr6  | 44609465  | 44609966  | RUNX2 (-686390), CDC5L (+254454)            |
| chr18 | 53790857  | 53792465  | TCF4 (-488476), TXNL1 (+514215)             |
| chr19 | 42615800  | 42616301  | POU2F2 (+20528), ZNF574 (+41533)            |
| chr9  | 98823828  | 98824329  | ERCC6L2 (+186096), HSD17B3 (+240355)        |
| chr5  | 95484831  | 95486878  | ELL2 (-188080), PCSK1 (+283129)             |
| chr21 | 47971450  | 47972810  | S100B (+52991), DIP2A (+93106)              |
| chr8  | 8153373   | 8154217   | ENSG00000182319 (+90213), ZNF705B (+352651) |
| chr4  | 13908729  | 13909809  | BOD1L1 (-279922)                            |
| chr1  | 245426652 | 245427153 | KIF26B (+108616)                            |
| chr6  | 106034799 | 106035300 | PRDM1 (-499145), PREP (-184091)             |
| chr16 | 88335245  | 88340362  | ZNF469 (-156075), BANP (+334180)            |
| chr17 | 29279393  | 29280168  | RNF135 (-17438), ADAP2 (+31083)             |
| chr9  | 91769683  | 91770184  | SHC3 (+23748), S1PR3 (+158513)              |
| chr18 | 10239475  | 10240655  | APCDD1 (-214560), VAPA (+326006)            |
| chr9  | 115624543 | 115625638 | SLC46A2 (+28102), SNX30 (+111973)           |
| chr2  | 172101553 | 172102054 | TLK1 (-84461), METTL8 (+188792)             |
| chr13 | 37881128  | 37881756  | CSNK1A1L (-201639), POSTN (+291539)         |
| chr14 | 75083007  | 75088249  | LTBP2 (-6594), AREL1 (+94190)               |
| chr21 | 36840543  | 36841044  | RUNX1 (-419153), SETD4 (+591765)            |
| chr12 | 19777961  | 19778588  | PDE3A (-743904), AEBP2 (+185667)            |
| chr9  | 129921306 | 129923613 | GARNL3 (-104345), ANGPTL2 (-37298)          |
| chr1  | 111327801 | 111331546 | KCNA3 (-112019), CD53 (-86102)              |
| chr7  | 40344584  | 40345895  | C7orf10 (+170665)                           |
| chr4  | 13919091  | 13919726  | BOD1L1 (-290062)                            |
| chr12 | 91615111  | 91618423  | DCN (-39867), BTG1 (+922906)                |
| chr3  | 48179191  | 48180035  | MAP4 (-48851), CDC25A (+50233)              |
| chr15 | 38342400  | 38343413  | SPRED1 (-201620), TMC05A (+115449)          |
| chr13 | 38063423  | 38066451  | CSNK1A1L (-385134), POSTN (+108044)         |
| chr15 | 65701259  | 65701896  | IGDCC3 (-31200), IGDCC4 (+13832)            |
| chr10 | 75654013  | 75654514  | CAMK2G (-19921), PLAU (-16651)              |
| chr15 | 102155728 | 102156229 | PCSK6 (-126106), TM2D3 (+36591)             |
| chr1  | 32154419  | 32155578  | PEF1 (-44511), COL16A1 (+14921)             |
| chr1  | 249219704 | 249220205 | ZNF692 (-66896)                             |

|       |           |           |                                     |
|-------|-----------|-----------|-------------------------------------|
| chr9  | 89589171  | 89589672  | DAPK1 (-523374), GAS1 (-27318)      |
| chr1  | 72122956  | 72126200  | ZRANB2 (-577598), NEGR1 (+623839)   |
| chr13 | 46745898  | 46746864  | CPB2 (-67220), LCP1 (+39102)        |
| chr2  | 175700774 | 175702491 | CHRNA1 (-72444), CHN1 (+168321)     |
| chr5  | 95561956  | 95563961  | ELL2 (-265184), PCSK1 (+206025)     |
| chr13 | 38017359  | 38017860  | CSNK1A1L (-337807), POSTN (+155371) |
| chr19 | 54538636  | 54539271  | VSTM1 (+28253), CACNG6 (+43412)     |
| chr3  | 55511144  | 55526179  | LRTM1 (-556561), WNT5A (+5311)      |
| chr1  | 245911068 | 245917390 | KIF26B (+595942), SMYD3 (+756290)   |
| chr6  | 22328475  | 22329126  | PRL (-31071)                        |
| chr12 | 96438615  | 96439116  | ELK3 (-149294), LTA4H (-9427)       |
| chr10 | 14048872  | 14052755  | FRMD4A (+322069), PRPF18 (+421887)  |
| chr3  | 55515028  | 55516034  | LRTM1 (-553430), WNT5A (+8442)      |
| chr2  | 57669443  | 57672773  | VRK2 (-463678)                      |
| chr3  | 161572673 | 161573174 | OTOL1 (+358328)                     |
| chr1  | 235153771 | 235155299 | IRF2BP2 (-409264), TOMM20 (+137716) |
| chr1  | 172348463 | 172354147 | PIGC (+61921), DNM3 (+540684)       |
| chr16 | 23681795  | 23682296  | PLK1 (-8097), DCTN5 (+29333)        |
| chr13 | 37936985  | 37937908  | CSNK1A1L (-257644), POSTN (+235534) |
| chr1  | 198745731 | 198746232 | PTPRC (+137812)                     |
| chr1  | 54198954  | 54199455  | GLIS1 (+672)                        |
| chr9  | 89023151  | 89023652  | ZCCHC6 (-54075), GAS1 (+538702)     |
| chr13 | 32785374  | 32787673  | BRCA2 (-103093), FRY (+181087)      |
| chr14 | 23639983  | 23641128  | CEBPE (-51731), SLC7A8 (+12293)     |
| chr3  | 160121804 | 160122305 | IFT80 (-4735)                       |
| chr3  | 194286536 | 194287239 | ATP13A3 (-67795), TMEM44 (+67262)   |
| chr2  | 192500312 | 192500938 | NABP1 (-42633), MYO1B (+390510)     |
| chr2  | 8226435   | 8228677   | ID2 (-591419)                       |
| chr14 | 52706884  | 52709097  | NID2 (-172279), PTGDR (-26440)      |
| chr8  | 103794954 | 103795590 | KLF10 (-127142), AZIN1 (+81693)     |
| chr12 | 118745016 | 118746246 | TAOK3 (+65119), PEBP1 (+171968)     |
| chr17 | 57826541  | 57853759  | VMP1 (+55324), TUBD1 (+130146)      |
| chr18 | 43381110  | 43384367  | SIGLEC15 (-22738), SLC14A1 (+76049) |
| chr6  | 117769067 | 117769701 | DCBLD1 (-34436), ROS1 (-22366)      |
| chr2  | 216564861 | 216565715 | FN1 (-264393), MREG (+313058)       |
| chr10 | 21687711  | 21688212  | NEBL (-501431), SKIDA1 (+126649)    |
| chr20 | 18686543  | 18687044  | SCP2D1 (-107576), DTD1 (+118257)    |
| chr2  | 189760358 | 189766099 | COL3A1 (-75817), GULP1 (+605670)    |
| chr13 | 46913459  | 46913960  | LCP1 (-128227), ESD (+457657)       |
| chr9  | 137394354 | 137395068 | COL5A1 (-138909), RXRA (+176285)    |
| chr3  | 146836709 | 146837456 | PLSCR1 (-574432), ZIC4 (+284988)    |
| chr5  | 102158300 | 102158934 | SLCO6A1 (-323897), PAM (-43097)     |
| chr16 | 88334875  | 88342762  | ZNF469 (-155060), BANP (+335195)    |
| chr2  | 132425601 | 132428239 | GPR39 (-747227), MZT2A (-176925)    |
| chr5  | 111012666 | 111013389 | STARD4 (-164820), NREP (+299600)    |
| chr8  | 104357388 | 104358324 | CTHRC1 (-25887), FZD6 (+46797)      |
| chr10 | 5604965   | 5609495   | CALML3 (+40306), ASB13 (+101311)    |
| chr6  | 106040422 | 106040923 | PRDM1 (-493522), PREP (-189714)     |
| chr10 | 14051439  | 14052496  | FRMD4A (+320915), PRPF18 (+423041)  |
| chr5  | 76151662  | 76152465  | CRHBP (-96474), S100Z (+6140)       |
| chr7  | 80264344  | 80264845  | GNAT3 (-123259), SEMA3C (+284072)   |
| chr9  | 135521528 | 135524447 | GTF3C4 (-22434), BARHL1 (+65416)    |
| chr6  | 44634461  | 44635826  | RUNX2 (-660962), CDC5L (+279882)    |
| chr18 | 46364921  | 46366009  | SMAD7 (+111616), CTIF (+299936)     |
| chr17 | 69185655  | 69186156  | SOX9 (-931255)                      |
| chr15 | 81384732  | 81385233  | IL16 (-132758), MESDC2 (-102764)    |

|       |           |           |                                      |
|-------|-----------|-----------|--------------------------------------|
| chr8  | 117434704 | 117437481 | TRPS1 (-754865), EIF3H (+331967)     |
| chr1  | 153358436 | 153359094 | S100A12 (-10640), S100A8 (+4899)     |
| chr9  | 118358039 | 118359800 | PAPPA (-557163), DEC1 (+454823)      |
| chr17 | 46078154  | 46081443  | CDK5RAP3 (+31392), COPZ2 (+35340)    |
| chr8  | 121789637 | 121790138 | SNTB1 (+35625), MTBP (+332222)       |
| chr7  | 17505572  | 17506356  | AHR (+167718), SNX13 (+474153)       |
| chr18 | 46578917  | 46579418  | SMAD7 (-102087), DYM (+408004)       |
| chr5  | 34051437  | 34055140  | RAI14 (-631370), C1QTNF3 (-9352)     |
| chr15 | 60095576  | 60096077  | FOXB1 (-200594), BNIP2 (-114094)     |
| chr13 | 40348377  | 40353955  | COG6 (+121352), FOXO1 (+889568)      |
| chr5  | 100113371 | 100114057 | ST8SIA4 (+125256), FAM174A (+242705) |
| chr21 | 36361237  | 36362004  | RUNX1 (+60020), CLIC6 (+319933)      |
| chr9  | 446219    | 446720    | KANK1 (-23821), DOCK8 (+231605)      |
| chr13 | 37783058  | 37783559  | CSNK1A1L (-103506), POSTN (+389672)  |
| chr1  | 246034109 | 246040639 | SMYD3 (+633145), KIF26B (+719087)    |
| chr12 | 28569265  | 28569766  | FAR2 (-807082), CCDC91 (+226137)     |
| chr8  | 49331155  | 49332879  | EFCAB1 (+315774), UBE2V2 (+411057)   |
| chr14 | 69224160  | 69225423  | ZFP36L1 (+35165), RAD51B (+938267)   |
| chr20 | 46419238  | 46421794  | SULF2 (-5186)                        |
| chr2  | 235073930 | 235075399 | SPP2 (+115322), ARL4C (+331032)      |
| chr6  | 1284863   | 1288538   | EXOC2 (-593590), FOXQ1 (-25974)      |
| chr21 | 35706928  | 35709671  | KCNE2 (-28023), SLC5A3 (+262430)     |
| chr7  | 40257840  | 40264912  | C7orf10 (+86801)                     |
| chr20 | 5634087   | 5635336   | CHGB (-257364), GPCPD1 (-43040)      |
| chr12 | 105710670 | 105711444 | APPL2 (-81196), NUAK1 (+822754)      |
| chr1  | 84155072  | 84155573  | TTLL7 (+309492)                      |
| chr6  | 80934066  | 80934918  | BCKDHB (+118128)                     |
| chr2  | 58266409  | 58267049  | VRK2 (+131943), FANCL (+201756)      |
| chr14 | 51909933  | 51910434  | FRMD6 (-208481), TMX1 (+203298)      |
| chr6  | 159797807 | 159798658 | FNDC1 (+207804), SOD2 (+316127)      |
| chr9  | 93732151  | 93732652  | SYK (+168333), AUH (+391793)         |
| chr4  | 151200132 | 151203167 | MAB21L2 (-301427), DCLK2 (+201470)   |
| chr5  | 52005032  | 52005940  | ITGA1 (-78244)                       |
| chr3  | 11571027  | 11572511  | VGLL4 (+113629), ATG7 (+257667)      |
| chr6  | 22025533  | 22027727  | PRL (+271100), SOX4 (+432658)        |
| chr7  | 44766904  | 44767563  | ZMIZ2 (-21296), OGDH (+120996)       |
| chr5  | 135348090 | 135348752 | LECT2 (-57698), TGFBI (-16163)       |
| chr13 | 50969677  | 50970178  | RNASEH2B (-513886), DLEU1 (+313621)  |
| chr8  | 124844469 | 124845768 | ANXA13 (-95477), FER1L6 (-19108)     |
| chr5  | 33787664  | 33788165  | ADAMTS12 (+104382), TARS (+346844)   |
| chr6  | 44627769  | 44628555  | RUNX2 (-667944), CDC5L (+272900)     |
| chr1  | 198462213 | 198462714 | ATP6V1G3 (+47611), NEK7 (+336371)    |
| chr9  | 89590295  | 89592296  | DAPK1 (-521500), GAS1 (-29192)       |
| chr8  | 49191902  | 49192403  | UBE2V2 (+271193), EFCAB1 (+455638)   |
| chr10 | 98500791  | 98501585  | LCOR (-91549), PIK3AP1 (-20917)      |
| chr5  | 167836169 | 167837126 | RARS (-76802), WWC1 (+117493)        |
| chr10 | 120551575 | 120552251 | NANOS1 (-237315), CACUL1 (-37155)    |
| chr10 | 128084826 | 128087080 | ADAM12 (-8929), C10orf90 (+124057)   |
| chr6  | 45644871  | 45645652  | SUPT3H (-299592), CLIC5 (+402870)    |
| chr10 | 72432415  | 72432916  | ADAMTS14 (+107)                      |
| chr2  | 189852918 | 189853892 | COL3A1 (+14359), COL5A2 (+191200)    |
| chr12 | 12635550  | 12636228  | MANSC1 (-132414), DUSP16 (+79428)    |
| chr6  | 125795456 | 125796171 | HEY2 (-274912), HDDC2 (-172532)      |
| chrX  | 133803400 | 133803901 | PLAC1 (-11138), FAM122B (+126734)    |
| chr7  | 33809163  | 33811488  | BMPER (-134197), BBS9 (+641182)      |
| chr9  | 13014203  | 13014895  | MPDZ (+265014), TYRP1 (+321114)      |

|       |           |           |                                       |
|-------|-----------|-----------|---------------------------------------|
| chr14 | 80680381  | 80680882  | DIO2 (-2789)                          |
| chr2  | 133141590 | 133142091 | MZT2A (-891846), GPR39 (-32306)       |
| chr2  | 189464266 | 189465346 | COL3A1 (-374240), GULP1 (+307247)     |
| chr1  | 206997070 | 206997571 | IL20 (-41378), IL19 (+25106)          |
| chr5  | 71799912  | 71801824  | ZNF366 (+2686), PTC2 (+184674)        |
| chr11 | 122727012 | 122728081 | CRTAM (+18339), BSX (+124881)         |
| chr4  | 54553455  | 54554570  | LNK1 (-96230), CHIC2 (+376844)        |
| chr1  | 222544958 | 222545459 | DUSP10 (-629691), HHIPL2 (+176236)    |
| chr2  | 163097412 | 163102671 | FAP (+3)                              |
| chr11 | 59952986  | 59953680  | MS4A6A (-2637)                        |
| chr20 | 25298093  | 25299140  | PYGB (+69912), ABHD12 (+73002)        |
| chr3  | 55223369  | 55225301  | LRTM1 (-262234), WNT5A (+299638)      |
| chr8  | 134161418 | 134166823 | SLA (-91518), WISP1 (-39161)          |
| chr3  | 153331423 | 153333074 | ARHGGEF26 (-506543), RAP2B (+452220)  |
| chr1  | 185941493 | 185942427 | PRG4 (-323451), HMCN1 (+238277)       |
| chr8  | 133957426 | 133959646 | TG (+79330), SLA (+114067)            |
| chr15 | 71920197  | 71923963  | SENP8 (-487112), THSD4 (+532789)      |
| chr6  | 114134761 | 114135262 | MARCKS (-43529)                       |
| chr20 | 46558362  | 46559255  | SULF2 (-143479), PREX1 (+885611)      |
| chr18 | 56517151  | 56517652  | ZNF532 (-12430), MALT1 (+178784)      |
| chr3  | 54988354  | 54989120  | LRTM1 (-26636), WNT5A (+535236)       |
| chr21 | 36358330  | 36358831  | RUNX1 (+63060), CLIC6 (+316893)       |
| chr2  | 189754527 | 189770371 | COL3A1 (-76597), GULP1 (+604890)      |
| chr12 | 92963663  | 92964164  | PLEKHG7 (-166397), CLLU1 (+146179)    |
| chr22 | 27528470  | 27531684  | CRYBA4 (+512149), MN1 (+667409)       |
| chr6  | 125698185 | 125699202 | HEY2 (-372032), HDDC2 (-75412)        |
| chr11 | 10612770  | 10615412  | LYVE1 (-23853), MRV1 (+101208)        |
| chr9  | 117314383 | 117314884 | DFNB31 (-47384), ATP6V1G1 (-35392)    |
| chr4  | 54726989  | 54730288  | LNK1 (-270856), CHIC2 (+202218)       |
| chr2  | 216527553 | 216528982 | FN1 (-227373), MREG (+350078)         |
| chr20 | 46555639  | 46556140  | SULF2 (-140560), PREX1 (+888530)      |
| chr21 | 36535776  | 36536277  | RUNX1 (-114386), SETD4 (+896532)      |
| chr9  | 92098822  | 92099323  | GADD45G (-120855), SEMA4D (-65325)    |
| chr1  | 198462017 | 198471065 | ATP6V1G3 (+43534), NEK7 (+340448)     |
| chr7  | 113686203 | 113689790 | FOXP2 (-367055), PPP1R3A (-128877)    |
| chr12 | 116818861 | 116821143 | MAP1LC3B2 (-177184), MED13L (-104859) |
| chr17 | 60866965  | 60870303  | MARCH10 (+17061), MRC2 (+163872)      |
| chr13 | 38015989  | 38027891  | CSNK1A1L (-342137), POSTN (+151041)   |
| chr1  | 165823055 | 165823911 | POGK (-985843), UCK2 (+26715)         |
| chr12 | 22840130  | 22840758  | ETNK1 (+62435)                        |
| chr12 | 96437667  | 96443263  | ELK3 (-147695), LTA4H (-11026)        |
| chr2  | 163112487 | 163112988 | FAP (-12693), IFIH1 (+62475)          |
| chr7  | 38389055  | 38390574  | STARD3NL (+171991), AMPH (+281352)    |
| chr2  | 189489146 | 189489973 | COL3A1 (-349486), GULP1 (+332001)     |
| chr18 | 54231977  | 54232478  | TCF4 (-929043), TXNL1 (+73648)        |
| chr5  | 95555631  | 95556132  | ELL2 (-258107), PCSK1 (+213102)       |
| chr6  | 45622123  | 45630467  | SUPT3H (-280625), CLIC5 (+421837)     |
| chr7  | 17621452  | 17622294  | AHR (+283627), SNX13 (+358244)        |
| chr6  | 6362959   | 6363460   | LY86 (-225131), F13A1 (-42143)        |
| chr5  | 33650474  | 33651109  | TARS (+209721), ADAMTS12 (+241505)    |
| chr9  | 21549041  | 21564291  | MTAP (-245876), IFNE (-74354)         |
| chr6  | 65229626  | 65230127  | PHF3 (+884136)                        |
| chr18 | 56605469  | 56605970  | SEC11C (-200989), ZNF532 (+75888)     |
| chr2  | 189440477 | 189442752 | COL3A1 (-397431), GULP1 (+284056)     |
| chr14 | 81235805  | 81239376  | DIO2 (-559748), CEP128 (+170538)      |
| chr8  | 105373054 | 105374451 | DCSTAMP (+21699), DPYS (+105528)      |

|       |           |           |                                            |
|-------|-----------|-----------|--------------------------------------------|
| chr18 | 43381716  | 43382937  | SIGLEC15 (-23150), SLC14A1 (+75637)        |
| chr18 | 6627816   | 6629143   | L3MBTL4 (-213570), ARHGAP28 (-205994)      |
| chr4  | 187853199 | 187853849 | FAT1 (-208515)                             |
| chr1  | 18201383  | 18201884  | IGSF21 (-232606), ACTL8 (+119826)          |
| chr6  | 21954299  | 21954981  | PRL (+343090), SOX4 (+360668)              |
| chr1  | 110852010 | 110852511 | RBM15 (-28867), KCNC4 (+98166)             |
| chr10 | 73132203  | 73132704  | SLC29A3 (+53439), C10orf105 (+347124)      |
| chr14 | 20895956  | 20896913  | TEP1 (-14855), OSGEP (+26829)              |
| chr10 | 127916139 | 127916640 | ADAM12 (+160634), FANK1 (+331282)          |
| chr11 | 20118142  | 20119462  | DBX1 (+63068), NAV2 (+383659)              |
| chr6  | 166672040 | 166672541 | T (-90184), SFT2D1 (+83788)                |
| chr2  | 158102463 | 158104137 | GALNT5 (-10810), GPD2 (+811347)            |
| chr6  | 25403333  | 25408720  | SCGN (-246437), LRRC16A (+126371)          |
| chr19 | 17633631  | 17634882  | FAM129C (+147)                             |
| chr20 | 7674787   | 7675483   | HAO1 (+245986), BMP2 (+926824)             |
| chr13 | 101528283 | 101528936 | TMTC4 (-201561), NALCN (+540096)           |
| chr15 | 58686475  | 58691075  | LIPC (-13993), AQP9 (+258380)              |
| chr14 | 85937931  | 85938432  | FLRT2 (-58306)                             |
| chr1  | 120229591 | 120230092 | ZNF697 (-39446), PHGDH (-24668)            |
| chr1  | 172246766 | 172248762 | PIGC (+165462), DNMT3 (+437143)            |
| chr6  | 122334481 | 122334982 | HSF2 (-385959), GJA1 (+577894)             |
| chr10 | 16870425  | 16871294  | RSU1 (-11478), CUBN (+300970)              |
| chr6  | 143496899 | 143498170 | AIG1 (+115522), ADAT2 (+274275)            |
| chr13 | 37960076  | 37960577  | CSNK1A1L (-280524), POSTN (+212654)        |
| chr2  | 28310132  | 28310633  | FOSL2 (-305342), RBKS (-196418)            |
| chr9  | 110810602 | 110811291 | KLF4 (-559020), ACTL7B (+808292)           |
| chr21 | 36561736  | 36562615  | RUNX1 (-140535), SETD4 (+870383)           |
| chr1  | 116322923 | 116326671 | CASQ2 (-13395), NHLH2 (+61741)             |
| chr1  | 76719409  | 76719910  | ST6GALNAC5 (-613466), ST6GALNAC3 (+179256) |
| chr4  | 122705602 | 122706103 | TMEM155 (-19513), EXOSC9 (-16622)          |
| chr3  | 62051355  | 62051856  | FEZF2 (+307584), PTPRG (+504021)           |
| chr17 | 60972771  | 60973272  | TANC2 (-113895), MARCH10 (-87327)          |
| chr2  | 102011815 | 102013750 | CREG2 (-8726), RFX8 (+78382)               |
| chr5  | 54196549  | 54197518  | ESM1 (+84457), SNX18 (+383441)             |
| chr6  | 47451913  | 47452414  | GPR111 (-172059), CD2AP (+6639)            |
| chr9  | 16963848  | 16964349  | CNTLN (-170881), BNC2 (-93395)             |
| chr9  | 89723727  | 89724733  | DAPK1 (-388566), GAS1 (-162126)            |
| chr10 | 31434783  | 31437061  | ZEB1 (-172179), ZNF438 (-115056)           |
| chr8  | 104359070 | 104361830 | CTHRC1 (-23293), FZD6 (+49391)             |
| chr11 | 131942315 | 131942965 | NTM (+161284), OPCML (+870926)             |
| chr6  | 17993088  | 17993589  | KIF13A (-5539), NHLRC1 (+129512)           |
| chr18 | 10373465  | 10382570  | APCDD1 (-76607), VAPA (+463959)            |
| chr7  | 17646859  | 17649619  | AHR (+309993), SNX13 (+331878)             |
| chr20 | 46520827  | 46521328  | SULF2 (-105748), PREX1 (+923342)           |
| chr14 | 104859756 | 104860257 | C14orf180 (-186014), C14orf144 (+149466)   |
| chr2  | 201036622 | 201037272 | TYW5 (-216488), SPATS2L (-133927)          |
| chr13 | 38100358  | 38102540  | CSNK1A1L (-421646), POSTN (+71532)         |
| chr2  | 216521830 | 216530931 | FN1 (-225486), MREG (+351965)              |
| chr3  | 59752482  | 59753113  | NONE                                       |
| chr18 | 8744585   | 8745335   | NDUFV2 (-357668), SOGA2 (+27591)           |
| chr18 | 20670881  | 20671382  | CABLES1 (-44595), RBBP8 (+157343)          |
| chr18 | 8944257   | 8946138   | NDUFV2 (-157430), SOGA2 (+227829)          |
| chr5  | 118022291 | 118025315 | TNFAIP8 (-666206)                          |
| chr8  | 70544809  | 70545310  | SULF1 (+166201), SLC05A1 (+202239)         |
| chr13 | 37700898  | 37703969  | CSNK1A1L (-22631), POSTN (+470547)         |
| chr2  | 207095262 | 207095969 | ZDBF2 (-43771), GPR1 (-12868)              |



|       |           |           |                                       |
|-------|-----------|-----------|---------------------------------------|
| chr2  | 102716773 | 102717274 | IL1R1 (-42222), IL1R2 (+108718)       |
| chr20 | 11188350  | 11189017  | JAG1 (-533990)                        |
| chr14 | 53628933  | 53629434  | DDHD1 (-9368), BMP4 (+794345)         |
| chr6  | 122115408 | 122116138 | HSF2 (-604918), GJA1 (+358935)        |
| chr12 | 106051377 | 106054853 | APPL2 (-423254), NUAK1 (+480696)      |
| chr16 | 55598122  | 55598623  | CAPNS2 (-2211)                        |
| chr12 | 127654773 | 127655274 | NONE                                  |
| chr21 | 36933736  | 36938779  | RUNX1 (-514617), SETD4 (+496301)      |
| chr18 | 8960037   | 8962493   | NDUFV2 (-141363), SOGA2 (+243896)     |
| chr5  | 174224803 | 174226441 | MSX2 (+74086), DRD1 (+645589)         |
| chr9  | 26169785  | 26170286  | CAAP1 (+722766)                       |
| chr15 | 39542764  | 39544006  | RASGRP1 (-686378), THBS1 (-329909)    |
| chr3  | 146687296 | 146689220 | PLSCR1 (-425607), ZIC4 (+433813)      |
| chr12 | 12110781  | 12112938  | BCL2L14 (-112013), ETV6 (+309072)     |
| chr9  | 137435466 | 137439226 | COL5A1 (-96274), RXRA (+218920)       |
| chr10 | 128109375 | 128110140 | ADAM12 (-32734), C10orf90 (+100252)   |
| chr8  | 49814862  | 49817402  | EFCAB1 (-168341), SNAI2 (+18167)      |
| chr14 | 76081208  | 76081709  | FLVCR2 (+36499), C14orf1 (+46073)     |
| chr10 | 52761033  | 52761534  | A1CF (-115849), PRKG1 (-72650)        |
| chr2  | 74795390  | 74795891  | DOK1 (+14428), M1AP (+79523)          |
| chr9  | 94308081  | 94310144  | NFIL3 (-122969), ROR2 (+403331)       |
| chr20 | 46465291  | 46466011  | SULF2 (-50321), PREX1 (+978769)       |
| chr17 | 42611306  | 42611969  | GPATCH8 (-30869), FZD2 (-23287)       |
| chr7  | 92532365  | 92535225  | CDK6 (-70564), SAMD9 (+213541)        |
| chr3  | 141055511 | 141056012 | ZBTB38 (-50892), ACPL2 (+105092)      |
| chr7  | 17698688  | 17701008  | SNX13 (+280269), AHR (+361602)        |
| chr13 | 38057702  | 38062599  | CSNK1A1L (-380348), POSTN (+112830)   |
| chr20 | 22885623  | 22886124  | FOXA2 (-320773), SSTR4 (-130183)      |
| chr1  | 205270555 | 205271345 | NUAK2 (+19933), TMCC2 (+73646)        |
| chr5  | 114918685 | 114919889 | FEM1C (-38696), TMED7-TICAM2 (+42571) |
| chr8  | 104197059 | 104197839 | FZD6 (-113610), BAALC (+44511)        |
| chr5  | 167231309 | 167231810 | WWC1 (-487595), TENM2 (+519756)       |
| chr20 | 46644927  | 46646418  | SULF2 (-230343), PREX1 (+798747)      |
| chr7  | 121384728 | 121385369 | FAM3C (-348661), PTPRZ1 (-128094)     |
| chr17 | 57843480  | 57846396  | VMP1 (+60112), TUBD1 (+125358)        |
| chr18 | 10297205  | 10308060  | APCDD1 (-151992), VAPA (+388574)      |
| chr2  | 234939410 | 234942589 | SPP2 (-18343), TRPM8 (+114957)        |
| chr5  | 178803914 | 178807478 | RUFY1 (-171863), ADAMTS2 (-33265)     |
| chr15 | 59268256  | 59268757  | SLTM (-42655), RNF111 (-11644)        |
| chr1  | 158789685 | 158790186 | OR6N2 (-42511), MNDA (-11171)         |
| chr2  | 235154126 | 235155622 | SPP2 (+195531), ARL4C (+250823)       |
| chr6  | 122336946 | 122337447 | HSF2 (-383494), GJA1 (+580359)        |
| chr11 | 131630527 | 131631028 | SNX19 (-844374), NTM (-150578)        |
| chr2  | 97063346  | 97063847  | ARID5A (-138889), NCAPH (+62072)      |
| chr22 | 23128916  | 23136144  | IGLL5 (-97430), GGTL2 (+143714)       |
| chr5  | 111280726 | 111287438 | STARD4 (-435874), NREP (+28546)       |
| chr2  | 189532514 | 189534776 | COL3A1 (-305401), GULP1 (+376086)     |
| chr21 | 36584508  | 36585175  | RUNX1 (-163201), SETD4 (+847717)      |
| chr3  | 106935872 | 106936373 | BBX (-305700)                         |
| chr15 | 39005821  | 39008449  | THBS1 (-866159), RASGRP1 (-150128)    |
| chr16 | 9165845   | 9167844   | USP7 (-109504)                        |
| chr9  | 117038330 | 117039022 | ORM1 (-46660), COL27A1 (+120836)      |
| chr2  | 177284106 | 177284607 | HNRNPA3 (-792934), MTX2 (+150210)     |
| chr18 | 33888756  | 33891022  | FHOD3 (+12212), TPGS2 (+519269)       |
| chr13 | 95919208  | 95921630  | SOX21 (-556030), ABCC4 (+33264)       |
| chr14 | 76296569  | 76300362  | TGFB3 (+149068), TTLL5 (+170845)      |

|       |           |           |                                     |
|-------|-----------|-----------|-------------------------------------|
| chr10 | 98018098  | 98018599  | BLNK (+12948), CCNJ (+215009)       |
| chr6  | 75982257  | 75983128  | COX7A2 (-22654), TMEM30A (+11991)   |
| chr15 | 89609527  | 89614830  | MFGE8 (-155537), ABHD2 (-19202)     |
| chr17 | 29281410  | 29282254  | RNF135 (-15387), ADAP2 (+33134)     |
| chr13 | 37737090  | 37737591  | CSNK1A1L (-57538), POSTN (+435640)  |
| chr1  | 172352055 | 172352739 | PIGC (+60829), DNM3 (+541776)       |
| chr1  | 94781131  | 94781632  | ABCD3 (-102629), ARHGAP29 (-78261)  |
| chr16 | 75336123  | 75336624  | BCAR1 (-36469), CFDP1 (+131009)     |
| chr2  | 237676303 | 237679959 | COPS8 (-315824), ACKR3 (+199847)    |
| chr9  | 92445425  | 92446207  | GADD45G (+225888), DIRAS2 (+959570) |
| chr22 | 28536959  | 28537627  | PITPNB (-222037), TTC28 (+538560)   |
| chr13 | 42187143  | 42190291  | RGCC (+157022), VWA8 (+346503)      |
| chr13 | 44404321  | 44405013  | ENOX1 (-43623), SMIM2 (+330726)     |
| chr12 | 91643816  | 91646331  | DCN (-68174), BTG1 (+894599)        |
| chr3  | 114050661 | 114051499 | TIGIT (+41131), ZBTB20 (+51408)     |
| chr5  | 56834595  | 56835286  | ACTBL2 (-56305), PLK2 (+921146)     |
| chr2  | 47417135  | 47417636  | EPCAM (-178901), CALM2 (-13646)     |
| chr4  | 141639848 | 141640539 | UCP1 (-150235), TBC1D9 (+37080)     |
| chr3  | 45145751  | 45148852  | CDCP1 (+40612), CLEC3B (+79627)     |
| chr16 | 65579692  | 65583895  | CDH5 (-818739), CDH11 (-425693)     |
| chr13 | 37742464  | 37752736  | CSNK1A1L (-67797), POSTN (+425381)  |
| chr4  | 13908228  | 13910750  | BOD1L1 (-280142)                    |
| chr8  | 103379685 | 103381394 | RRM2B (-129194), UBR5 (+44529)      |
| chr5  | 42983805  | 42986970  | SEPP1 (-173207), ZNF131 (-136312)   |
| chr11 | 71655546  | 71656513  | IL18BP (-54079), RNF121 (+16283)    |
| chr13 | 38053352  | 38069734  | CSNK1A1L (-381740), POSTN (+111438) |
| chr7  | 68739655  | 68743641  | AUTS2 (-322671)                     |
| chr8  | 95111440  | 95114880  | CDH17 (+107655), PDP1 (+183985)     |
| chr17 | 20110363  | 20110864  | SPECC1 (+120279), LGALS9B (+260234) |
| chr16 | 73186939  | 73187626  | ZFH3 (-105009)                      |
| chr10 | 63022808  | 63023309  | RHOBTB1 (-319054), TMEM26 (+190149) |
| chr2  | 189748006 | 189749093 | COL3A1 (-90496), GULP1 (+590991)    |
| chr4  | 156523312 | 156524710 | MAP9 (-225889), GUCY1A3 (-64339)    |
| chr6  | 22236710  | 22237591  | PRL (+60579), SOX4 (+643179)        |
| chr16 | 53699484  | 53700110  | AKTIP (-162634), RPGRIP1L (+37961)  |
| chr6  | 119941579 | 119943338 | MAN1A1 (-271533)                    |
| chrX  | 133683067 | 133685735 | HPRT1 (+90218), PLAC1 (+108112)     |
| chr1  | 198743665 | 198748236 | PTPRC (+137781)                     |
| chr12 | 67774766  | 67777347  | DYRK2 (-266444), CAND1 (+112996)    |
| chr1  | 153362961 | 153363462 | S100A8 (+452)                       |
| chr13 | 32784859  | 32788429  | BRCA2 (-102973), FRY (+181207)      |
| chr15 | 32979168  | 32979669  | GREM1 (-30756), SCG5 (+45542)       |
| chr13 | 38054970  | 38055637  | CSNK1A1L (-375501), POSTN (+117677) |
| chr3  | 154796464 | 154798329 | MME (-39)                           |
| chr13 | 38056179  | 38056680  | CSNK1A1L (-376627), POSTN (+116551) |
| chr9  | 137705532 | 137706535 | FCN2 (-66624), COL5A1 (+172414)     |
| chr1  | 98366890  | 98367535  | DPYD (+19366)                       |
| chr2  | 235149888 | 235150660 | SPP2 (+190931), ARL4C (+255423)     |
| chr12 | 89176203  | 89176704  | KITLG (-202216), DUSP6 (+570594)    |
| chr18 | 53789595  | 53793233  | TCF4 (-488229), TXNL1 (+514462)     |
| chr21 | 36721121  | 36727808  | RUNX1 (-302824), SETD4 (+708094)    |
| chr10 | 33522009  | 33522926  | ITGB1 (-275646), NRP1 (+102722)     |
| chr6  | 56776347  | 56777957  | DST (-269358), KIAA1586 (-134195)   |
| chr9  | 117967356 | 117969940 | PAPPA (-947435), DEC1 (+64551)      |
| chr12 | 91757710  | 91758211  | DCN (-181061), BTG1 (+781712)       |
| chr1  | 246164937 | 246165438 | SMYD3 (+505331), KIF26B (+846901)   |

|       |           |           |                                       |
|-------|-----------|-----------|---------------------------------------|
| chr17 | 46558623  | 46565762  | SKAP1 (-54641), HOXB1 (+46166)        |
| chr8  | 134027929 | 134030278 | SLA (+43499), TG (+149898)            |
| chr5  | 178803841 | 178805854 | RUFY1 (-172711), ADAMTS2 (-32417)     |
| chr4  | 77674420  | 77676497  | SEPT11 (-195397), SHROOM3 (+319206)   |
| chr2  | 189438169 | 189439453 | COL3A1 (-400235), GULP1 (+281252)     |
| chr14 | 56800026  | 56801184  | TMEM260 (-245906), PELI2 (+215512)    |
| chr7  | 41460663  | 41461499  | INHBA (+281625)                       |
| chr9  | 118789965 | 118790610 | PAPPA (-125795), DEC1 (+886191)       |
| chr1  | 66954038  | 66962433  | SGIP1 (-41729), PDE4B (+700039)       |
| chr6  | 119941773 | 119942274 | MAN1A1 (-271098)                      |
| chr4  | 169542882 | 169544028 | PALLD (+125200), CBR4 (+387954)       |
| chr18 | 10039980  | 10040990  | APCDD1 (-414140), VAPA (+126426)      |
| chr12 | 118743976 | 118746789 | TAOK3 (+65367), PEBP1 (+171720)       |
| chr3  | 25551185  | 25551686  | RARB (+81634), TOP2B (+154554)        |
| chr6  | 114133370 | 114135993 | MARCKS (-43859)                       |
| chr2  | 201036161 | 201038983 | TYW5 (-217113), SPATS2L (-133302)     |
| chr2  | 216529740 | 216530241 | FN1 (-229096), MREG (+348355)         |
| chr6  | 147360502 | 147361136 | STXBP5 (-164850), ADGB (+440718)      |
| chr2  | 192266279 | 192266780 | NABP1 (-276728), MYO1B (+156415)      |
| chr2  | 28303135  | 28304896  | FOSL2 (-311709), RBKS (-190051)       |
| chr8  | 95176601  | 95178433  | CDH17 (+43298), PDP1 (+248342)        |
| chr17 | 8826124   | 8826625   | PIK3R6 (-55381), PIK3R5 (+42649)      |
| chr8  | 37273595  | 37274096  | ZNF703 (-279423), KCNU1 (+631954)     |
| chr11 | 106268993 | 106269849 | AASDHPPT (+321205), GUCY1A2 (+619750) |
| chr1  | 79026820  | 79027321  | IFI44L (-59017), PTGFR (+70314)       |
| chr6  | 149884257 | 149884884 | GINM1 (-2859)                         |
| chr2  | 238005870 | 238006502 | COPS8 (+12231), COL6A3 (+316832)      |
| chr1  | 77836120  | 77836621  | AK5 (+88635), ZZZ3 (+311972)          |
| chr11 | 131941297 | 131941798 | NTM (+160192), OPCML (+872018)        |
| chr14 | 59281650  | 59282151  | DAAM1 (-448272), DACT1 (+177004)      |
| chr7  | 139530373 | 139530874 | TBXAS1 (+1672), PARP12 (+232897)      |
| chr9  | 78056152  | 78057619  | PCSK5 (-448674), OSTF1 (+353427)      |
| chr8  | 105372069 | 105375062 | DCSTAMP (+21512), DPYS (+105715)      |
| chr5  | 41795041  | 41795542  | PLCXD3 (-284589), OXCT1 (+75329)      |
| chr18 | 18743105  | 18744274  | GREB1L (-199864), ROCK1 (-51878)      |
| chr6  | 22364260  | 22364761  | PRL (-66781)                          |
| chr3  | 99427570  | 99428384  | COL8A1 (+70658), FILIP1L (+405380)    |
| chr11 | 13236247  | 13239360  | ARNTL (-61541), TEAD1 (+471216)       |
| chr10 | 80477727  | 80478228  | ZMIZ1 (-350814), RPS24 (+684460)      |
| chr5  | 169230418 | 169231176 | FOXI1 (-302104), DOCK2 (+166546)      |
| chr10 | 72452707  | 72456116  | ADAMTS14 (+21853), TBATA (+90745)     |
| chr14 | 73109305  | 73111027  | DPF3 (+250643), RGS6 (+711010)        |
| chr2  | 225746389 | 225747066 | CUL3 (-296663), DOCK10 (+160431)      |
| chr11 | 105050950 | 105054706 | GRIA4 (-427972), CARD18 (-42375)      |
| chr5  | 167125658 | 167126472 | WWC1 (-593090), TENM2 (+414261)       |
| chr5  | 178733446 | 178734466 | ADAMTS2 (+38475), ZNF354C (+246540)   |
| chr12 | 12540285  | 12540786  | MANSC1 (-37061), DUSP16 (+174781)     |
| chr18 | 56467242  | 56468960  | ZNF532 (-61731), MALT1 (+129483)      |
| chr12 | 27329236  | 27334780  | STK38L (-65100), MED21 (+156525)      |
| chr6  | 37682060  | 37682561  | ZFAND3 (-104964), MDGA1 (-16545)      |
| chr2  | 238031538 | 238032039 | COPS8 (+37834), COL6A3 (+291229)      |
| chr10 | 76802253  | 76802754  | DUPD1 (+15768), KAT6B (+216121)       |
| chr2  | 200992139 | 200992640 | SPATS2L (-178484), TYW5 (-171931)     |
| chr1  | 15585845  | 15586476  | EFHD2 (-150230), TMEM51 (+107133)     |
| chr8  | 132826107 | 132830813 | ADCY8 (-773788), EFR3A (-87875)       |
| chr8  | 86853729  | 86856299  | REXO1L10P (-96269), PSKH2 (+226912)   |

|       |           |           |                                      |
|-------|-----------|-----------|--------------------------------------|
| chr1  | 200148782 | 200149435 | NR5A2 (+152379), ZNF281 (+230075)    |
| chr6  | 155253072 | 155255197 | CLDN20 (-331012), TIAM2 (+100304)    |
| chr1  | 198463358 | 198464315 | ATP6V1G3 (+46238), NEK7 (+337744)    |
| chr10 | 20914088  | 20914589  | NEBL (+272192), PLXDC2 (+809171)     |
| chr15 | 33131115  | 33131616  | GREM1 (+121191), FMN1 (+228719)      |
| chr5  | 6228238   | 6228872   | MED10 (+150152)                      |
| chr6  | 170714733 | 170715415 | FAM120B (+99230), PSMB1 (+147355)    |
| chr8  | 95111119  | 95116972  | CDH17 (+106769), PDP1 (+184871)      |
| chr7  | 40854630  | 40855131  | C7orf10 (+680306), INHBA (+887825)   |
| chr17 | 60690891  | 60691392  | MRC2 (-13620), TLK2 (+134756)        |
| chr3  | 48178680  | 48180051  | MAP4 (-48604), CDC25A (+50480)       |
| chr3  | 153330667 | 153334051 | ARHGEF26 (-506433), RAP2B (+452330)  |
| chr6  | 11609111  | 11609753  | TMEM170B (+70921), ADTRP (+169604)   |
| chr20 | 46520730  | 46521672  | SULF2 (-105871), PREX1 (+923219)     |
| chr3  | 66353216  | 66354023  | LRIG1 (+197736), SLC25A26 (+234335)  |
| chr18 | 11246243  | 11246931  | GNAL (-442368), PIEZO2 (-98000)      |
| chr6  | 22366880  | 22367513  | PRL (-69467)                         |
| chr2  | 98950194  | 98950956  | TMEM131 (-338221), CNGA3 (-12043)    |
| chrX  | 45337840  | 45339157  | KRBOX4 (-967793), CXorf36 (-278353)  |
| chr3  | 62571178  | 62574416  | FEZF2 (-213607), CADPS (+288257)     |
| chr14 | 103827566 | 103829194 | MARK3 (-23477), EIF5 (+28041)        |
| chr17 | 60901884  | 60902385  | TANC2 (-184782), MARCH10 (-16440)    |
| chr18 | 52804510  | 52809810  | RAB27B (+311730), TCF4 (+496025)     |
| chr17 | 41811231  | 41811732  | MEOX1 (-72160), SOST (+24674)        |
| chr5  | 14574437  | 14575097  | FAM105B (-90090), TRIO (+430956)     |
| chr18 | 52806274  | 52807379  | RAB27B (+311397), TCF4 (+496358)     |
| chr12 | 66661211  | 66663961  | HELB (-33739), IRAK3 (+79927)        |
| chr18 | 33895313  | 33895965  | FHOD3 (+17962), TPGS2 (+513519)      |
| chr1  | 170587150 | 170590286 | PRRX1 (-44329), GORAB (+87448)       |
| chr21 | 36952679  | 36954099  | RUNX1 (-531748), SETD4 (+479170)     |
| chr12 | 47308159  | 47308660  | PCED1B (-164976), SLC38A4 (-88630)   |
| chr4  | 159043336 | 159044017 | FAM198B (+50525), GRIA2 (+901807)    |
| chr2  | 208258706 | 208260756 | KLF7 (-229062), CREB1 (-134885)      |
| chr8  | 49814457  | 49818157  | EFCAB1 (-168516), SNAI2 (+17992)     |
| chr13 | 111684375 | 111685005 | ARHGEF7 (-82934), ING1 (+317361)     |
| chr15 | 39539841  | 39541331  | RASGRP1 (-683579), THBS1 (-332708)   |
| chr15 | 51496554  | 51497055  | CYP19A1 (+134002), AP4E1 (+295935)   |
| chr10 | 33653569  | 33655988  | NRP1 (-29589)                        |
| chr21 | 36721010  | 36724347  | RUNX1 (-301038), SETD4 (+709880)     |
| chr10 | 61321536  | 61322037  | SLC16A9 (+148050), PHYHIPL (+385437) |
| chr3  | 154959073 | 154959574 | MME (+161888), PLCH1 (+434504)       |
| chr6  | 137959646 | 137960147 | TNFAIP3 (-228684), OLIG3 (-144366)   |
| chr15 | 71919038  | 71929263  | SENP8 (-485041), THSD4 (+534860)     |
| chr12 | 7651931   | 7652704   | CD163L1 (-55537), CD163 (+4171)      |
| chr3  | 8663815   | 8664640   | SSUH2 (+22256), LMCD1 (+120835)      |
| chr2  | 102715395 | 102718897 | IL1R1 (-42100), IL1R2 (+108840)      |
| chr11 | 86226317  | 86227839  | ME3 (+156600), C11orf73 (+213813)    |
| chr6  | 113769163 | 113771387 | MARCKS (-408266)                     |
| chr9  | 21579256  | 21579757  | MTAP (-223035), IFNE (-97195)        |
| chr15 | 58809495  | 58810227  | LIPC (+107093), ADAM10 (+232316)     |
| chr1  | 59391639  | 59400450  | FGGY (-366608), JUN (-146260)        |
| chr15 | 56201537  | 56202038  | PRTG (-166611), NEDD4 (+7541)        |
| chr8  | 104240934 | 104243306 | FZD6 (-68939), BAALC (+89182)        |
| chr2  | 175698486 | 175703300 | CHRNA1 (-71704), CHN1 (+169061)      |
| chr5  | 150858563 | 150864769 | SLC36A1 (+34509), FAT2 (+86839)      |
| chr12 | 7708836   | 7709337   | CD163 (-52598), APOBEC1 (+109402)    |

|       |           |           |                                                                                                                             |
|-------|-----------|-----------|-----------------------------------------------------------------------------------------------------------------------------|
| chr2  | 201089984 | 201090485 | TYW5 (-269776), SPATS2L (-80639)                                                                                            |
| chr15 | 63542796  | 63543436  | APH1B (-26637), RAB8B (+61448)                                                                                              |
| chr20 | 55606310  | 55606811  | BMP7 (+235123), TFAP2C (+402203)                                                                                            |
| chr5  | 92544633  | 92545559  | NR2F1 (-373947)                                                                                                             |
| chr3  | 194918387 | 194919086 | LSG1 (-525531), XXYL1 (+73159)                                                                                              |
| chr6  | 119948160 | 119949977 | MAN1A1 (-278143)                                                                                                            |
| chr17 | 10459523  | 10460316  | MYH2 (-6646), MYH3 (+100706)                                                                                                |
| chr13 | 47911945  | 47912446  | HTR2A (-442023), SUCLA2 (+663266)                                                                                           |
| chr3  | 194285862 | 194288019 | ATP13A3 (-67848), TMEM44 (+67209)                                                                                           |
| chr9  | 137713825 | 137714326 | FCN2 (-58582), COL5A1 (+180456)                                                                                             |
| chr2  | 192301384 | 192302486 | NABP1 (-241323), MYO1B (+191820)                                                                                            |
| chr2  | 114518497 | 114520990 | ACTR3 (-127793), SLC35F5 (-5344)                                                                                            |
| chr1  | 200336629 | 200338021 | ZNF281 (+41859), NR5A2 (+340595)                                                                                            |
| chr7  | 41136199  | 41138863  | INHBA (+605175), C7orf10 (+962956)                                                                                          |
| chr13 | 37738307  | 37739633  | CSNK1A1L (-59167), POSTN (+434011)                                                                                          |
| chr5  | 142001126 | 142001627 | FGF1 (-470)                                                                                                                 |
| chr6  | 45591713  | 45594959  | SUPT3H (-247666), CLIC5 (+454796)                                                                                           |
| chr14 | 35119020  | 35120077  | SNX6 (-20160), CFL2 (+63485)                                                                                                |
| chr2  | 176794395 | 176794896 | ATP5G3 (-745311), HOXD10 (-186661), HOXD11 (-177368), HOXD12 (-169812), HOXD13 (-162973), KIAA1715 (+72427), EVX2 (+153995) |
| chr14 | 85526099  | 85526600  | FLRT2 (-470138)                                                                                                             |
| chr8  | 119269320 | 119269821 | EXT1 (-145479), TNFRSF11B (+694868)                                                                                         |
| chr2  | 38923614  | 38924115  | GALM (+30813), SRSF7 (+54771)                                                                                               |
| chr8  | 82408410  | 82414323  | FABP4 (-15869), FABP12 (+32246)                                                                                             |
| chr16 | 65579209  | 65584032  | CDH5 (-818912), CDH11 (-425520)                                                                                             |
| chr5  | 33649033  | 33651641  | TARS (+209266), ADAMTS12 (+241960)                                                                                          |
| chr7  | 2748476   | 2751528   | AMZ1 (+30846), GNA12 (+133956)                                                                                              |
| chr7  | 50677913  | 50678414  | DDC (-45010), GRB10 (+121886)                                                                                               |
| chr15 | 62149285  | 62149955  | C2CD4A (-209556)                                                                                                            |
| chr4  | 25332446  | 25333927  | ANAPC4 (-45648), ZCCHC4 (+18779)                                                                                            |
| chr5  | 142601783 | 142602720 | NR3C1 (+181002), ARHGAP26 (+452303)                                                                                         |
| chr12 | 12532307  | 12533211  | MANSC1 (-29284), DUSP16 (+182558)                                                                                           |
| chr9  | 131999701 | 132000202 | NTMT1 (-371211), PPP2R4 (+126355)                                                                                           |
| chr20 | 57740572  | 57741208  | SLMO2 (-122926), ZNF831 (-25185)                                                                                            |
| chr6  | 16436888  | 16437541  | GMPR (+198404), ATXN1 (+324472)                                                                                             |
| chr20 | 35559631  | 35560132  | SOGA1 (-67793), SAMHD1 (+20364)                                                                                             |
| chr22 | 50799519  | 50800218  | PPP6R2 (+18117), SBF1 (+113584)                                                                                             |
| chr19 | 47434243  | 47442942  | NPAS1 (-84484), ARHGAP35 (+16660)                                                                                           |
| chr22 | 25461665  | 25469259  | CRYBB3 (-130355), TMEM211 (-122800)                                                                                         |
| chr9  | 123654329 | 123654830 | PHF19 (-14974), TRAF1 (+36467)                                                                                              |
| chr12 | 6551875   | 6558495   | TAPBPL (-6065), CD27 (+1152)                                                                                                |
| chr12 | 105431097 | 105431787 | SLC41A2 (-109009), ALDH1L2 (+46913)                                                                                         |
| chr9  | 136563738 | 136569315 | SARDH (+38515), DBH (+65045)                                                                                                |
| chr3  | 177144529 | 177145159 | TBL1XR1 (-230578)                                                                                                           |
| chr16 | 82685429  | 82685930  | CDH13 (+25110)                                                                                                              |
| chr1  | 117352773 | 117353814 | PTGFRN (-99385), CD2 (+56287)                                                                                               |
| chr8  | 126660265 | 126661488 | TRIB1 (+218314), FAM84B (+909761)                                                                                           |
| chrX  | 1585235   | 1591846   | ASMTL (-16775), P2RY8 (+67459)                                                                                              |
| chr11 | 78174949  | 78178247  | GAB2 (-47746), NARS2 (+109311)                                                                                              |
| chr7  | 44931253  | 44931931  | PURB (-6632), MYO1G (+87105)                                                                                                |
| chr14 | 102285292 | 102285793 | DYNC1H1 (-145322), PPP2R5C (+57408)                                                                                         |
| chr3  | 27680363  | 27682052  | SLC4A7 (-182963), EOMES (+82781)                                                                                            |
| chr16 | 80689801  | 80691838  | DYNLRB2 (+115966), CDYL2 (+147406)                                                                                          |
| chr9  | 136542882 | 136543743 | DBH (+41831), SARDH (+61729)                                                                                                |
| chr14 | 22988957  | 22991169  | DAD1 (+68112), OR4E2 (+856766)                                                                                              |
| chr10 | 115719515 | 115721019 | DCLRE1A (-106408), ADRB1 (-83539)                                                                                           |

|       |           |           |                                      |
|-------|-----------|-----------|--------------------------------------|
| chr4  | 40300256  | 40314920  | CHRNA9 (-29758), RHOH (+109061)      |
| chr2  | 202116804 | 202117305 | CASP8 (-5704), CASP10 (+69451)       |
| chr7  | 105445016 | 105451645 | EFCAB10 (-226388), CDHR3 (-155354)   |
| chr1  | 53873161  | 53882368  | LRP8 (-84079), DMRTB1 (-47307)       |
| chr10 | 3798399   | 3798900   | PITRM1 (-583647), KLF6 (+28817)      |
| chr1  | 86853842  | 86857120  | COL24A1 (-233035), ODF2L (+6464)     |
| chr5  | 130589875 | 130590376 | CDC42SE2 (-9667), LYRM7 (+83623)     |
| chr21 | 32556469  | 32556970  | KRTAP19-8 (-145925), TIAM1 (+374570) |
| chrX  | 70838060  | 70838561  | CXCR3 (+49)                          |
| chr11 | 72230273  | 72232151  | CLPB (-85520), PDE2A (+154285)       |
| chr16 | 80690240  | 80690741  | DYNLRB2 (+115637), CDYL2 (+147735)   |
| chr6  | 74180645  | 74181146  | MTO1 (+9595), EEF1A1 (+49845)        |
| chr22 | 48492286  | 48495682  | FAM19A5 (-391288)                    |
| chr14 | 22992853  | 22993354  | DAD1 (+65071), OR4E2 (+859807)       |
| chr9  | 136566201 | 136568675 | SARDH (+37604), DBH (+65956)         |
| chr1  | 101414591 | 101417104 | SLC30A7 (+54216), DPH5 (+75480)      |
| chr6  | 131601702 | 131604222 | ARG1 (-291403), AKAP7 (+146156)      |
| chr22 | 47009079  | 47009747  | CELSR1 (-76346), GRAMD4 (-6886)      |
| chr8  | 101506083 | 101507823 | RNF19A (-191466), ANKRD46 (+65017)   |
| chr2  | 235397333 | 235399252 | ARL4C (+7404), SPP2 (+438950)        |
| chr6  | 119635111 | 119636053 | FAM184A (-235674), MAN1A1 (+35344)   |
| chr9  | 136540408 | 136544499 | DBH (+40972), SARDH (+62588)         |
| chr4  | 40244627  | 40245128  | CHRNA9 (-92468), RHOH (+46351)       |
| chr14 | 23000536  | 23002649  | DAD1 (+56582), OR4E2 (+868296)       |
| chr6  | 152502544 | 152509757 | SYNE1 (+452383), ESR1 (+494520)      |
| chr20 | 57738269  | 57739512  | SLMO2 (-120927), ZNF831 (-27184)     |
| chr7  | 35768562  | 35769063  | SEPT7 (-71814), HERPUD2 (-34068)     |
| chr21 | 35306739  | 35307240  | MRPS6 (-138833), ATP5O (-18706)      |
| chr14 | 22994167  | 22994668  | DAD1 (+63757), OR4E2 (+861121)       |
| chr14 | 91868623  | 91869580  | GPR68 (-148833), CCDC88C (+15019)    |
| chr5  | 156621118 | 156621768 | CYFIP2 (-71695), ITK (+13606)        |
| chr5  | 65015021  | 65015522  | NLN (-2751)                          |
| chr12 | 6532643   | 6538261   | CD27 (-18581), LTBR (+42253)         |
| chr1  | 160396593 | 160403694 | VANGL2 (+29768), SLAMF6 (+92899)     |
| chr1  | 150077080 | 150085546 | PLEKHO1 (-40857), VPS45 (+41944)     |
| chr15 | 22547432  | 22558028  | TUBGCP5 (-280665), OR4N4 (+170348)   |
| chr14 | 22978080  | 22979642  | DAD1 (+79314), OR4E2 (+845564)       |
| chr1  | 160398669 | 160400247 | VANGL2 (+29082), SLAMF6 (+93585)     |
| chr16 | 84580983  | 84589583  | TLDC1 (-46919), COTL1 (+66400)       |
| chr12 | 47785242  | 47786379  | AMIGO2 (-312163), RPAP3 (+314033)    |
| chr15 | 38958846  | 38967781  | THBS1 (-909980), RASGRP1 (-106307)   |
| chr6  | 31765562  | 31766063  | VARS (-2083)                         |
| chr18 | 43245932  | 43246433  | SLC14A1 (-60507), SLC14A2 (+51417)   |
| chr16 | 82689319  | 82689820  | CDH13 (+29000)                       |
| chr4  | 40190281  | 40236501  | CHRNA9 (-123955), RHOH (+14864)      |
| chr19 | 34840730  | 34841231  | GPI (-14664), LSM14A (+177510)       |
| chrX  | 70839769  | 70840270  | CXCR3 (-1660)                        |
| chr22 | 40720101  | 40720802  | ADSL (-22055), TNRC6B (+146523)      |
| chr18 | 13376829  | 13378206  | LDLRAD4 (+158732), FAM210A (+349041) |
| chr17 | 46502910  | 46508324  | SKAP1 (+1935), SNX11 (+320697)       |
| chrX  | 70835285  | 70845259  | CXCR3 (-1912)                        |
| chr20 | 48286296  | 48286797  | PTGIS (-101864), B4GALT5 (+43868)    |
| chr6  | 74131890  | 74132391  | DDX43 (+27670), MB21D1 (+29858)      |
| chr15 | 77305365  | 77305866  | PSTPIP1 (+18190), TSPAN3 (+57954)    |
| chr12 | 22558935  | 22571599  | ST8SIA1 (-77619), C2CD5 (+132213)    |
| chr11 | 36443096  | 36443722  | PRR5L (+45854), TRAF6 (+88413)       |

|       |           |           |                                          |
|-------|-----------|-----------|------------------------------------------|
| chr5  | 94127733  | 94131451  | ANKRD32 (+175540), MCTP1 (+490687)       |
| chr4  | 40195867  | 40196759  | RHOH (-2214)                             |
| chr6  | 42353871  | 42363833  | MRPS10 (-173249), TRERF1 (+60931)        |
| chr12 | 12537405  | 12537906  | MANSC1 (-34181), DUSP16 (+177661)        |
| chrX  | 42797766  | 42811880  | MAOA (-710644)                           |
| chr6  | 106970350 | 106970851 | AIM1 (+10871), RTN4IP1 (+106761)         |
| chr19 | 4108186   | 4110586   | ZBTB7A (-42443), MAP2K2 (+14740)         |
| chr16 | 27416994  | 27417653  | IL21R (+3841), GTF3C1 (+143903)          |
| chr2  | 198058554 | 198083702 | PGAP1 (-279673), ANKRD44 (+104383)       |
| chr2  | 197039167 | 197039668 | STK17B (-3119)                           |
| chr10 | 30991593  | 30992094  | LYZL2 (-73153), ZNF438 (+329022)         |
| chr3  | 113930069 | 113946920 | DRD3 (-40596), ZNF80 (+17930)            |
| chr4  | 26884955  | 26889831  | STIM2 (+24930)                           |
| chr3  | 150916592 | 150924147 | GPR171 (+609)                            |
| chr16 | 16054652  | 16055758  | ABCC1 (+11771), ABCC6 (+262116)          |
| chr1  | 211854593 | 211855094 | NEK2 (-5884), LPGAT1 (+149270)           |
| chr12 | 6553986   | 6555033   | CD27 (+477)                              |
| chr22 | 47008011  | 47010947  | CELSR1 (-76412), GRAMD4 (-6820)          |
| chr12 | 31960139  | 31960640  | BICD1 (-299773), H3F3C (-15215)          |
| chr17 | 38754246  | 38755318  | CCR7 (-33058), SMARCE1 (+49978)          |
| chr11 | 60807126  | 60811572  | CD5 (-60518), CD6 (+70197)               |
| chr4  | 40302186  | 40303377  | CHRNA9 (-34564), RHOH (+104255)          |
| chr17 | 45808380  | 45815157  | TBX21 (+1159), OSBPL7 (+87367)           |
| chr17 | 47821985  | 47828708  | KAT7 (-40570), SLC35B1 (-40030)          |
| chr20 | 37470694  | 37471333  | FAM83D (-83941), PPP1R16B (+36666)       |
| chr2  | 234173752 | 234181486 | SAG (-38848), ATG16L1 (+17402)           |
| chr16 | 29018458  | 29026471  | LAT (+26318), NPIP11 (+392885)           |
| chr8  | 19483727  | 19484228  | INTS10 (-190673), CSGALNACT1 (-23972)    |
| chr22 | 40299270  | 40299771  | TNRC6B (-274408), GRAP2 (+2435)          |
| chr19 | 47436878  | 47439149  | NPAS1 (-85063), ARHGAP35 (+16081)        |
| chr16 | 57038362  | 57038863  | NLRC5 (+15203), FAM192A (+181363)        |
| chr1  | 160605661 | 160618700 | CD84 (-62887), SLAMF1 (+4904)            |
| chr17 | 33487097  | 33490110  | UNC45B (+13768), SLC35G3 (+32808)        |
| chr6  | 105903810 | 105904311 | PRDM1 (-630134), PREP (-53102)           |
| chr6  | 105900063 | 105911501 | PRDM1 (-628413), PREP (-54823)           |
| chr1  | 14059437  | 14060884  | KAZN (-865039), PRDM2 (+28811)           |
| chr16 | 57633161  | 57638132  | GPR56 (-26772), GPR114 (+59046)          |
| chr17 | 17083446  | 17083947  | PLD6 (+25932), MPRIP (+137623)           |
| chr22 | 37562925  | 37564462  | IL2RB (-17664), C1QTNF6 (+20635)         |
| chr12 | 9822347   | 9823366   | CLEC2D (+548)                            |
| chr10 | 22943544  | 22944045  | PIP4K2A (+59689), SPAG6 (+309396)        |
| chr13 | 50996471  | 50997129  | RNASEH2B (-487014), DLEU1 (+340493)      |
| chr7  | 99816868  | 99817606  | PVRIG (+378)                             |
| chr8  | 82009131  | 82009632  | ZNF704 (-222366), PAG1 (+14921)          |
| chr15 | 38964261  | 38964762  | THBS1 (-908782), RASGRP1 (-107505)       |
| chr11 | 14598605  | 14602616  | ENSG00000256206 (-58721), PSMA1 (+64552) |
| chr12 | 9814544   | 9832825   | CLEC2D (+1376), CLECL1 (+62210)          |
| chr1  | 112140417 | 112140918 | ADORA3 (-94558), RAP1A (-21737)          |
| chr12 | 40007884  | 40018451  | ABCD2 (+385)                             |
| chr6  | 12051910  | 12053364  | EDN1 (-237959), HIVEP1 (+40066)          |
| chr21 | 35308394  | 35309952  | MRPS6 (-136650), ATP5O (-20889)          |
| chr22 | 37565062  | 37565563  | IL2RB (-19283), C1QTNF6 (+19016)         |
| chr15 | 96382227  | 96382728  | NR2F2 (-491468)                          |
| chr3  | 46015723  | 46016224  | FYCO1 (+21333), CXCR6 (+29463)           |
| chr5  | 75620153  | 75625379  | IQGAP2 (-76308), SV2C (+243769)          |
| chr8  | 116440097 | 116440598 | TRPS1 (+240880)                          |

|       |           |           |                                           |
|-------|-----------|-----------|-------------------------------------------|
| chr19 | 6673919   | 6676080   | TNFSF14 (-4401)                           |
| chr5  | 40383416  | 40384091  | DAB2 (-958482), PTGER4 (-295846)          |
| chr6  | 166829808 | 166830455 | MPC1 (-33646), RPS6KA2 (+445907)          |
| chr22 | 36771965  | 36773098  | MYH9 (+11531), APOL1 (+123408)            |
| chr4  | 101938388 | 101944356 | EMCN (-502122), PPP3CA (+327265)          |
| chrX  | 42802069  | 42802744  | MAOA (-713060)                            |
| chr4  | 90216544  | 90217045  | TIGD2 (+182827), SNCA (+541495)           |
| chr6  | 152492422 | 152493070 | SYNE1 (+465788), ESR1 (+481115)           |
| chr17 | 37922658  | 37941763  | GRB7 (+37187), IKZF3 (+88230)             |
| chr22 | 25456883  | 25459564  | CRYBB3 (-137593), TMEM211 (-115562)       |
| chr3  | 71542107  | 71542608  | FOXP1 (-362370), EIF4E3 (+232168)         |
| chr6  | 37480289  | 37487227  | CCDC167 (-16060), MDGA1 (+182008)         |
| chr17 | 44095444  | 44099584  | STH (+20898), KANSL1 (+172652)            |
| chr11 | 60842562  | 60851807  | CD5 (-22682), CD6 (+108033)               |
| chr14 | 92332720  | 92333810  | TC2N (+608)                               |
| chr2  | 106772689 | 106779594 | UXS1 (+34653), C2orf40 (+94030)           |
| chr11 | 35099577  | 35100963  | CD44 (-60458), PDHX (+162151)             |
| chr7  | 50419582  | 50420083  | IKZF1 (+71515), FIGNL1 (+97589)           |
| chr2  | 179894325 | 179898700 | TTN (-224363), CCDC141 (+18273)           |
| chr2  | 181989309 | 181989810 | ITGA4 (-332392), UBE2E3 (+144227)         |
| chr17 | 33371134  | 33382038  | RFFL (+39752), LIG3 (+69073)              |
| chr12 | 22560578  | 22565481  | ST8SIA1 (-75382), C2CD5 (+134450)         |
| chrX  | 78361984  | 78365900  | GPR174 (-62527), P2RY10 (+163024)         |
| chr14 | 93034968  | 93035469  | RIN3 (+55101), LGMN (+179805)             |
| chr17 | 55678822  | 55679323  | ENSG00000166329 (+143600), MSI2 (+345178) |
| chr2  | 38890142  | 38899942  | GALM (+1990), SRSF7 (+83594)              |
| chr7  | 151465483 | 151466312 | RHEB (-248888), PRKAG2 (+108312)          |
| chr14 | 75980577  | 75982199  | BATF (-7380), JDP2 (+82551)               |
| chr2  | 242809947 | 242811134 | CXXC11 (-1340)                            |
| chr13 | 24838950  | 24839640  | C1QTNF9 (-42009), SPATA13 (+285351)       |
| chr2  | 112912712 | 112913365 | FBLN7 (+17077), ZC3H8 (+99649)            |
| chr2  | 9821393   | 9821894   | TAF1B (-161839), YWHAQ (-50899)           |
| chr14 | 23010271  | 23010772  | DAD1 (+47653), OR4E2 (+877225)            |
| chr6  | 53196661  | 53204092  | GCM1 (-186750), ELOVL5 (+13371)           |
| chr8  | 29353764  | 29358817  | DUSP4 (-148106), TMEM66 (+584432)         |
| chr11 | 48023823  | 48024324  | OR4B1 (-214270), PTPRJ (+21961)           |
| chr22 | 26974954  | 26976094  | TFIP11 (-67053), TPST2 (+10603)           |
| chr6  | 35315991  | 35316492  | FANCE (-103896), PPARD (+5851)            |
| chr14 | 22941652  | 23040684  | DAD1 (+67007), OR4E2 (+857871)            |
| chr4  | 3204336   | 3204837   | RGS12 (-111287), HTT (+128179)            |
| chr4  | 81091194  | 81096210  | ANTXR2 (-99985), PRDM8 (-12722)           |
| chr1  | 156493112 | 156496578 | MEF2D (-24225), IQGAP3 (+47487)           |
| chr7  | 55603327  | 55603828  | VOPP1 (+36640), LANCL2 (+170437)          |
| chr6  | 108144702 | 108145203 | SCML4 (+563)                              |
| chr2  | 204718786 | 204719287 | CTLA4 (-13472), CD28 (+147766)            |
| chr17 | 38016530  | 38024959  | ZBP2 (-3672), IKZF3 (-304)                |
| chr12 | 40015012  | 40015513  | ABCD2 (-1710)                             |
| chr5  | 118605926 | 118606427 | TNFAIP8 (-83832)                          |
| chr11 | 122940932 | 122941433 | HSPA8 (-8140), CLMP (+124806)             |
| chr11 | 78176049  | 78176550  | GAB2 (-47448), NARS2 (+109609)            |
| chr8  | 29846506  | 29854854  | DUSP4 (-642495), TMEM66 (+90043)          |
| chr6  | 108139540 | 108146695 | SCML4 (+2398), SOBP (+331956)             |
| chr16 | 57634252  | 57635560  | GPR56 (-27513), GPR114 (+58305)           |
| chr14 | 23013104  | 23013864  | DAD1 (+44691), OR4E2 (+880187)            |
| chr21 | 35303467  | 35312234  | MRPS6 (-137972), ATP5O (-19567)           |
| chr8  | 101398501 | 101399163 | RNF19A (-83345), ANKRD46 (+173138)        |



|       |           |           |                                      |
|-------|-----------|-----------|--------------------------------------|
| chr11 | 60869346  | 60869847  | CD5 (-270)                           |
| chr1  | 100862734 | 100863235 | GPR88 (-140708), CDC14A (+44938)     |
| chr9  | 126083867 | 126086186 | STRBP (-54172), CRB2 (-33512)        |
| chr2  | 143882341 | 143891095 | ARHGAP15 (-165)                      |
| chr1  | 118206587 | 118207088 | GDAP2 (+265415), MAN1A2 (+296767)    |
| chr9  | 95721995  | 95735525  | SUSD3 (-92229), FGD3 (+19027)        |
| chr17 | 45735264  | 45738961  | TBKBP1 (-35517), KPNB1 (+9909)       |
| chr19 | 19713059  | 19713560  | PBX4 (+16415), CILP2 (+64253)        |
| chr10 | 8372730   | 8375794   | GATA3 (+277606)                      |
| chr7  | 50354220  | 50356220  | IKZF1 (+6902), FIGNL1 (+162202)      |
| chr15 | 63772085  | 63772586  | CA12 (-97976), USP3 (-24474)         |
| chr6  | 45978658  | 45979159  | SUPT3H (-633239), CLIC5 (+69223)     |
| chr4  | 7857178   | 7857679   | PSAPL1 (-420729), AFAP1 (+84224)     |
| chr11 | 3034690   | 3035316   | NAP1L4 (-21396), CARS (+43664)       |
| chr17 | 66249598  | 66250248  | ARSG (-5400), AMZ2 (+6208)           |
| chr19 | 6536521   | 6537022   | TNFSF9 (+5762), CD70 (+54391)        |
| chr18 | 21573767  | 21574637  | CABYR (-144740), LAMA3 (+304795)     |
| chr13 | 30476809  | 30478393  | UBL3 (-52780), KATNAL1 (+404020)     |
| chr1  | 211526272 | 211526773 | TRAF5 (+26344), RD3 (+139736)        |
| chr11 | 128395685 | 128396313 | ETS1 (+61438)                        |
| chr22 | 37545092  | 37546124  | IL2RB (+422)                         |
| chr5  | 14705604  | 14707602  | FAM105B (+41746), ANKH (+165284)     |
| chr15 | 44966067  | 44979407  | PATL2 (-3651)                        |
| chr3  | 45986383  | 45987303  | CXCR6 (+332)                         |
| chr11 | 60870610  | 60871111  | CD5 (+994)                           |
| chr1  | 160406457 | 160409253 | VANGL2 (+37479), SLAMF6 (+85188)     |
| chr14 | 52735194  | 52735695  | PTGER2 (-45668), PTGDR (+1014)       |
| chr8  | 126618587 | 126620095 | TRIB1 (+176778), FAM84B (+951297)    |
| chr11 | 118742870 | 118750542 | DDX6 (-84861), CXCR5 (-7769)         |
| chr14 | 61802702  | 61803203  | HIF1A (-361387), PRKCH (+14518)      |
| chr9  | 136545235 | 136551671 | DBH (+46971), SARDH (+56589)         |
| chr2  | 214103336 | 214104897 | IKZF2 (-89059), SPAG16 (-44996)      |
| chr13 | 74636802  | 74637582  | KLF12 (-68006)                       |
| chr11 | 60827940  | 60828599  | CD5 (-41597), CD6 (+89118)           |
| chr6  | 166833295 | 166833796 | MPC1 (-37060), RPS6KA2 (+442493)     |
| chr6  | 24927627  | 24942270  | LRRC16A (-344707), FAM65B (-23754)   |
| chr1  | 183923694 | 183928035 | APOBEC4 (-303417), COLGALT2 (+80998) |
| chr10 | 11192089  | 11192590  | CELF2 (+132447), USP6NL (+381934)    |
| chr4  | 101940355 | 101940988 | EMCN (-501422), PPP3CA (+327965)     |
| chr13 | 30715871  | 30728683  | UBL3 (-297456), KATNAL1 (+159344)    |
| chr14 | 97922272  | 97927106  | VRK1 (+661048)                       |
| chr4  | 153505069 | 153508734 | FBXW7 (-49649), TMEM154 (+94415)     |
| chr8  | 11314595  | 11315560  | BLK (-36432), SLC35G5 (+126681)      |
| chr1  | 211508663 | 211509419 | TRAF5 (+8862), RD3 (+157218)         |
| chr18 | 21572353  | 21573154  | CABYR (-146188), LAMA3 (+303347)     |
| chr10 | 11185978  | 11195884  | CELF2 (+131038), USP6NL (+383343)    |
| chr17 | 62128029  | 62128530  | ICAM2 (-30286), ERN1 (+79205)        |
| chr5  | 80302830  | 80303331  | CKMT2 (-226062), RASGRF2 (+46590)    |
| chr16 | 75109533  | 75110168  | LDHD (+40814), ZNRF1 (+76923)        |
| chr20 | 24929859  | 24930679  | CST7 (+403)                          |
| chr1  | 117340474 | 117360707 | PTGFRN (-102088), CD2 (+53584)       |
| chr20 | 42845751  | 42849106  | JPH2 (-31211), FITM2 (+92380)        |
| chr7  | 151841509 | 151842677 | GALNT11 (+70710), KMT2C (+290997)    |
| chr1  | 29251084  | 29257870  | EPB41 (+40874), TMEM200B (+194536)   |
| chr8  | 8729451   | 8730296   | ERI1 (-129783), CLDN23 (+170426)     |
| chr8  | 128985309 | 128995420 | TMEM75 (-29774)                      |

|       |           |           |                                     |
|-------|-----------|-----------|-------------------------------------|
| chr1  | 111209329 | 111218516 | KCNA2 (-63872), KCNA3 (+3732)       |
| chr11 | 76864229  | 76864881  | MYO7A (+25245), GDPD4 (+133908)     |
| chr6  | 16420380  | 16422367  | GMPR (+182563), ATXN1 (+340313)     |
| chr1  | 88702128  | 88702629  | PKN2 (-447526), LMO4 (+908228)      |
| chr10 | 22929210  | 22948260  | PIP4K2A (+64749), SPAG6 (+304336)   |
| chr9  | 74398436  | 74398937  | TMEM2 (-14887), ABHD17B (+127160)   |
| chr12 | 2102864   | 2103365   | CACNA2D4 (-75113), DCP1B (+10562)   |
| chr17 | 14104026  | 14105710  | HS3ST3B1 (-99532), COX10 (+132022)  |
| chr9  | 99160478  | 99162936  | SLC35D2 (-15728), ZNF367 (+18904)   |
| chr1  | 224810344 | 224813035 | DNAH14 (-305679), CNIH3 (+7695)     |
| chr2  | 136892297 | 136893857 | THSD7B (-746672), CXCR4 (-19264)    |
| chr3  | 46017050  | 46018020  | FYCO1 (+19772), CXCR6 (+31024)      |
| chr16 | 3264400   | 3266942   | OR1F1 (+11424), ZNF200 (+19496)     |
| chr3  | 114008486 | 114021822 | TIGIT (+5205), ZBTB20 (+87334)      |
| chr18 | 3056838   | 3063313   | LPIN2 (-48131), MYOM1 (+160030)     |
| chr15 | 64000794  | 64001295  | FBXL22 (+111493), HERC1 (+125042)   |
| chr5  | 61552006  | 61552648  | KIF2A (-49952), C5orf64 (+618691)   |
| chr9  | 2655083   | 2655737   | KCNV2 (-62092), VLDLR (+33576)      |
| chr11 | 36396380  | 36403320  | PRR5L (+2295), TRAF6 (+131972)      |
| chr12 | 6535750   | 6536417   | CD27 (-17949), LTBR (+42885)        |
| chr3  | 195913315 | 195914520 | TFRC (-104858), ZDHHC19 (+24348)    |
| chr7  | 142498598 | 142499099 | EPHB6 (-53943), PRSS1 (+41519)      |
| chr20 | 35271068  | 35276264  | SLA2 (+953)                         |
| chr1  | 15904965  | 15906724  | AGMAT (+5760), DNAJC16 (+52537)     |
| chr20 | 55973542  | 55974630  | RBM38 (+7623), CTCFL (+126077)      |
| chr16 | 29713011  | 29713512  | QPRT (+22904), C16orf54 (+44065)    |
| chr17 | 66176604  | 66182402  | AMZ2 (-64212), KPNA2 (+147427)      |
| chr8  | 134071209 | 134072096 | SLA (+950)                          |
| chr5  | 118635390 | 118635891 | TNFAIP8 (-54368)                    |
| chr10 | 105224843 | 105233473 | CALHM1 (-10513), CALHM3 (+9839)     |
| chr22 | 23155462  | 23166922  | IGLL5 (-68768), GGTL2 (+172376)     |
| chr16 | 29159873  | 29160374  | LAT (+163977), NPIP11 (+255226)     |
| chr19 | 47452870  | 47463947  | NPAS1 (-64668), ARHGAP35 (+36476)   |
| chr15 | 56335080  | 56335720  | NEDD4 (-126071), RFX7 (+200083)     |
| chr9  | 123685662 | 123688563 | PHF19 (-47507), TRAF1 (+3934)       |
| chr8  | 27238001  | 27238502  | PTK2B (+69253), CHRNA2 (+98561)     |
| chr4  | 90208827  | 90210028  | TIGD2 (+175460), SNCA (+548862)     |
| chr1  | 203734136 | 203735626 | LAX1 (+577)                         |
| chr3  | 105471551 | 105472052 | CBLB (+116085), ALCAM (+386049)     |
| chr2  | 96829225  | 96830452  | DUSP2 (-18660), STARD7 (+44717)     |
| chr22 | 25463184  | 25465082  | CRYBB3 (-131684), TMEM211 (-121471) |
| chr3  | 46006299  | 46006938  | CXCR6 (+20108), FYCO1 (+30688)      |
| chr2  | 198869836 | 198870535 | PLCL1 (+200760)                     |
| chr2  | 192068785 | 192070036 | STAT4 (-53425), MYO1B (-40704)      |
| chr5  | 150590241 | 150592530 | ANXA6 (-53943), GM2A (-41067)       |
| chr6  | 167459762 | 167462850 | CCR6 (-74951), FGFR1OP (+48636)     |
| chr1  | 15903758  | 15907492  | AGMAT (+5980), DNAJC16 (+52317)     |
| chr11 | 108095665 | 108097584 | NPAT (-3256), ATM (+3066)           |
| chr19 | 18230008  | 18230780  | PIK3R2 (-33232), IL12RB1 (-20635)   |
| chr12 | 69721582  | 69727207  | LYZ (-17726), CPSF6 (+91078)        |
| chr1  | 26099254  | 26103077  | SEPN1 (-25501), MAN1C1 (+157207)    |
| chr13 | 50938744  | 50942273  | RNASEH2B (-543305), DLEU1 (+284202) |
| chr9  | 101815563 | 101816064 | TGFBR1 (-51557), COL15A1 (+109893)  |
| chr12 | 90275565  | 90276066  | ATP2B1 (-173208)                    |
| chr7  | 7195389   | 7200309   | CCZ1B (-331448), C1GALT1 (-24397)   |
| chr1  | 117305346 | 117306342 | PTGFRN (-146835), CD2 (+8837)       |

|       |           |           |                                     |
|-------|-----------|-----------|-------------------------------------|
| chr2  | 36467355  | 36467856  | CRIM1 (-115463)                     |
| chr9  | 116278109 | 116283606 | ZNF618 (-357704), RGS3 (+73847)     |
| chrX  | 1598609   | 1603589   | ASMTL (-29333), P2RY8 (+54901)      |
| chr15 | 55567027  | 55579060  | PIGB (-38114), RAB27A (-10452)      |
| chr1  | 167772098 | 167775179 | MPZL1 (+82452), ADCY10 (+109701)    |
| chrX  | 13111458  | 13113409  | FAM9C (-49713), ATXN3L (+226084)    |
| chr2  | 158288556 | 158304949 | ERMN (-112528), CYTIP (+3901)       |
| chr7  | 90956220  | 90956721  | FZD1 (+62688), MTERF (+553563)      |
| chr1  | 26695889  | 26706176  | ZNF683 (-1767)                      |
| chr16 | 50711007  | 50723755  | SNX20 (-2118)                       |
| chr21 | 43825004  | 43826010  | UBASH3A (+1483), RSPH1 (+90957)     |
| chr6  | 149469030 | 149469531 | TAB2 (-172907), UST (+400817)       |
| chr20 | 51026207  | 51028124  | TSHZ2 (-561780), ZFP64 (-218641)    |
| chr9  | 74407243  | 74412420  | TMEM2 (-26032), ABHD17B (+116015)   |
| chr6  | 11258748  | 11259582  | TMEM170B (-279346), NEDD9 (-26250)  |
| chr14 | 22986357  | 22987952  | DAD1 (+71020), OR4E2 (+853858)      |
| chr16 | 27411366  | 27422273  | IL21R (+3337), GTF3C1 (+144407)     |
| chr3  | 133224462 | 133226352 | CDV3 (-67167), BFSP2 (+106568)      |
| chr17 | 38758841  | 38759342  | CCR7 (-37368), SMARCE1 (+45668)     |
| chr7  | 139910043 | 139910544 | JHDM1D (-33459), SLC37A3 (+188055)  |
| chr16 | 57609963  | 57614294  | GPR56 (-50290), GPR114 (+35528)     |
| chr10 | 72360661  | 72364037  | PRF1 (+182)                         |
| chr14 | 71608704  | 71609205  | SIPA1L1 (-387087), PCNX (+234833)   |
| chr18 | 51790724  | 51791225  | POLI (-4799)                        |
| chr1  | 160615216 | 160617210 | SLAMF1 (+872)                       |
| chr1  | 117349974 | 117351969 | PTGFRN (-101707), CD2 (+53965)      |
| chr20 | 57720964  | 57723321  | SLMO2 (-104179), ZNF831 (-43932)    |
| chr9  | 277988    | 278656    | KANK1 (-191969), DOCK8 (+63457)     |
| chr1  | 89733638  | 89755573  | GBP6 (-85011), GBP5 (-6062)         |
| chr1  | 7989430   | 7992551   | UTS2 (-77500), TNFRSF9 (+9935)      |
| chr12 | 47598926  | 47618881  | AMIGO2 (-135256), RPAP3 (+490940)   |
| chr10 | 44748916  | 44749417  | ZNF32 (-605015), CXCL12 (+131330)   |
| chr17 | 34219623  | 34220254  | CCL5 (-12427), RDM1 (+37838)        |
| chr1  | 27159558  | 27160059  | SFN (-29824), ZDHHC18 (+6608)       |
| chr17 | 37946630  | 37953072  | GRB7 (+54827), IKZF3 (+70590)       |
| chr2  | 68986025  | 69008421  | ARHGAP25 (+35256), BMP10 (+101426)  |
| chr16 | 29672362  | 29679325  | QPRT (-14514), SPN (+1264)          |
| chrX  | 13014963  | 13029511  | TMSB4X (+29008), FAM9C (+40484)     |
| chr1  | 198586641 | 198658059 | PTPRC (+14180)                      |
| chr7  | 3081624   | 3084458   | CARD11 (+538)                       |
| chr17 | 14094736  | 14110500  | HS3ST3B1 (-101782), COX10 (+129772) |
| chr1  | 167417553 | 167418250 | CD247 (+69873), POU2F1 (+227836)    |
| chr1  | 27989245  | 27990014  | FGR (-27842), IFI6 (+9059)          |
| chr3  | 45990398  | 45993692  | CXCR6 (+5534), FYCO1 (+45262)       |
| chrX  | 70842188  | 70843503  | CXCR3 (-4486)                       |
| chr10 | 6616324   | 6628874   | PRKCQ (-336)                        |
| chr4  | 871855    | 874410    | CPLX1 (-53147), GAK (+52953)        |
| chr2  | 38924899  | 38925400  | GALM (+32098), SRSF7 (+53486)       |
| chr3  | 16882646  | 16886399  | DAZL (-238226), PLCL2 (-41929)      |
| chr14 | 99396599  | 99400357  | BCL11B (+339087)                    |
| chrX  | 78363671  | 78364595  | GPR174 (-62336), P2RY10 (+163215)   |
| chr7  | 142500062 | 142500563 | EPHB6 (-52479), PRSS1 (+42983)      |
| chr4  | 78748059  | 78748560  | MRPL1 (-35364), CNOT6L (-7766)      |
| chr7  | 142505975 | 142506476 | EPHB6 (-46566), PRSS1 (+48896)      |
| chr10 | 14603768  | 14605081  | FRMD4A (-231542), CDNF (+275646)    |
| chr19 | 10251123  | 10257544  | EIF3G (-23756), DNMT1 (+51421)      |

|       |           |           |                                      |
|-------|-----------|-----------|--------------------------------------|
| chr2  | 99386436  | 99386937  | MGAT4A (-39098), TSGA10 (+384693)    |
| chr3  | 151968729 | 151978317 | MBNL1 (-12306), SUCNR1 (+382092)     |
| chr21 | 43821261  | 43829736  | UBASH3A (+1475), RSPH1 (+90965)      |
| chr8  | 128992363 | 128992864 | TMEM75 (-32023)                      |
| chr22 | 27037108  | 27045777  | CRYBA4 (+23515)                      |
| chr14 | 65753177  | 65759420  | MAX (-187111), FUT8 (-121011)        |
| chr2  | 38936957  | 38937458  | SRSF7 (+41428), GALM (+44156)        |
| chr2  | 231090477 | 231091125 | SP140 (+355)                         |
| chr7  | 110652977 | 110653478 | LRRN3 (-77834)                       |
| chr15 | 38938927  | 38947031  | THBS1 (-930315), RASGRP1 (-85972)    |
| chr11 | 117814861 | 117825540 | IL10RA (-36862), TMPRSS13 (-20121)   |
| chr15 | 69760772  | 69761640  | RPLP1 (+16083), TLE3 (+629309)       |
| chr19 | 30162047  | 30164118  | PLEKHF1 (+7120), C19orf12 (+42880)   |
| chr17 | 47823604  | 47825305  | KAT7 (-41462), SLC35B1 (-39138)      |
| chr12 | 127647212 | 127648457 | NONE                                 |
| chr10 | 47638687  | 47642649  | AGAP10 (-400930), ANTXRL (-17566)    |
| chr2  | 222379657 | 222386337 | EPHA4 (+54013)                       |
| chr5  | 100188678 | 100190404 | ST8SIA4 (+49429), FAM174A (+318532)  |
| chr9  | 92034787  | 92036356  | SEMA4D (-1824)                       |
| chr14 | 71448858  | 71449359  | SIPA1L1 (-546933), PCNX (+74987)     |
| chr6  | 158710467 | 158713028 | TULP4 (-21944), GTF2H5 (+122364)     |
| chr5  | 138944791 | 138945757 | CXXC5 (-82603), UBE2D2 (+4523)       |
| chr15 | 78682257  | 78682758  | IREB2 (-48023), CRABP1 (+49842)      |
| chr3  | 16522248  | 16523945  | RFTN1 (+32116), OXNAD1 (+216391)     |
| chr11 | 72862172  | 72871257  | P2RY2 (-62629), FCHSD2 (-13409)      |
| chr7  | 158987554 | 158992782 | VIPR2 (-52519)                       |
| chr16 | 71915372  | 71915873  | ZNF821 (+2427), ATXN1L (+35729)      |
| chr10 | 14627708  | 14628209  | FRMD4A (-255076), CDNF (+252112)     |
| chr8  | 29346619  | 29352035  | DUSP4 (-141142), TMEM66 (+591396)    |
| chr6  | 33309151  | 33313927  | KIFC1 (-47774), DAXX (-20748)        |
| chr22 | 39482591  | 39496984  | APOBEC3H (-3492)                     |
| chr22 | 37624524  | 37626916  | SSTR3 (-17358), RAC2 (+14590)        |
| chr5  | 14925656  | 14926157  | FBXL7 (-574398), ANKH (-54020)       |
| chr6  | 43349854  | 43353356  | ABCC10 (-43687), ZNF318 (-14424)     |
| chr11 | 104668618 | 104670875 | PDGFD (-634912), CASP12 (+99413)     |
| chr6  | 149458842 | 149463590 | TAB2 (-180972), UST (+392752)        |
| chr10 | 33442255  | 33443543  | ITGB1 (-196077), NRP1 (+182291)      |
| chr1  | 90204943  | 90205444  | LRR8D (-81397), LRR8C (+106563)      |
| chr19 | 6666821   | 6671251   | CD70 (-77873), TNFSF14 (+1563)       |
| chr2  | 172175545 | 172176046 | TLK1 (-158453), METTL8 (+114800)     |
| chr14 | 92335922  | 92337221  | TC2N (-2699)                         |
| chr17 | 33860038  | 33863132  | SLFN12L (-46709), SLFN14 (+23532)    |
| chr7  | 50728475  | 50732422  | DDC (-97295), GRB10 (+69601)         |
| chr8  | 67576155  | 67576656  | C8orf44-SGK3 (-3445), VCPIP1 (+3046) |
| chr5  | 49931173  | 49931674  | EMB (-194223), PARP8 (-31348)        |
| chr17 | 34214569  | 34221716  | CCL5 (-10631), RDM1 (+39634)         |
| chr22 | 36055450  | 36057247  | APOL5 (-57570), APOL6 (+11907)       |
| chr12 | 9884868   | 9885369   | CLECL1 (+776)                        |
| chr2  | 196400119 | 196400620 | SLC39A10 (-121101)                   |
| chr12 | 92267056  | 92273545  | DCN (-693401), BTG1 (+269372)        |
| chr3  | 16338999  | 16362011  | OXNAD1 (+43799), RFTN1 (+204708)     |
| chr22 | 25458198  | 25458901  | CRYBB3 (-137267), TMEM211 (-115888)  |
| chr12 | 51714523  | 51715024  | SMAGP (-50100), BIN2 (+3174)         |
| chr1  | 111768785 | 111769466 | CHIA (-64412), CHI3L2 (+25733)       |
| chr5  | 14992975  | 14993476  | FBXL7 (-507079), ANKH (-121339)      |
| chr22 | 24036346  | 24039988  | RGL4 (+5119), ZNF70 (+55112)         |

|       |           |           |                                      |
|-------|-----------|-----------|--------------------------------------|
| chr2  | 234178431 | 234180388 | SAG (-37057), ATG16L1 (+19193)       |
| chr14 | 97924698  | 97926035  | VRK1 (+661726)                       |
| chr19 | 39027078  | 39030995  | MAP4K1 (+79527), RYR1 (+104567)      |
| chr6  | 20364909  | 20369239  | MBOAT1 (-154444), E2F3 (-35324)      |
| chr2  | 158325375 | 158326145 | CYTIP (-25106), ACVR1C (+159757)     |
| chr8  | 59711075  | 59721331  | NSMAF (-144110), TOX (+315564)       |
| chr11 | 58292777  | 58293278  | OR5B21 (-17450), LPXN (+52611)       |
| chr19 | 39028530  | 39030464  | MAP4K1 (+79067), RYR1 (+105027)      |
| chr18 | 3059869   | 3061599   | LPIN2 (-48789), MYOM1 (+159372)      |
| chr18 | 2982378   | 2982879   | LPIN2 (+29316), EMILIN2 (+135601)    |
| chr1  | 117277788 | 117285090 | IGSF3 (-71125), CD2 (-15568)         |
| chr4  | 90202489  | 90230019  | TIGD2 (+182286), SNCA (+542036)      |
| chr17 | 3669192   | 3669900   | ITGAE (+34991), GSG2 (+42335)        |
| chr8  | 124398319 | 124399034 | ZHX1 (-111942), ATAD2 (+10028)       |
| chr6  | 52167743  | 52174527  | PAQR8 (-55791), MCM3 (-21500)        |
| chr2  | 86078379  | 86081854  | ST3GAL5 (+36020), ATOH8 (+99100)     |
| chr19 | 16479051  | 16479910  | KLF2 (+43853), EPS15L1 (+103342)     |
| chr1  | 160608287 | 160609003 | CD84 (-59351), SLAMF1 (+8440)        |
| chr2  | 106352782 | 106359090 | FHL2 (-340255), NCK2 (-5418)         |
| chr5  | 118666215 | 118666716 | TNFAIP8 (-23543)                     |
| chr2  | 29230923  | 29241709  | C2orf71 (+60811), WDR43 (+118807)    |
| chr8  | 142255361 | 142256160 | SLC45A4 (-17088), GPR20 (+121606)    |
| chr6  | 53199626  | 53201609  | GCM1 (-186991), ELOVL5 (+13130)      |
| chr8  | 142253897 | 142256794 | SLC45A4 (-16673), GPR20 (+122021)    |
| chr12 | 69724758  | 69725519  | LYZ (-16982), CPSF6 (+91822)         |
| chr4  | 90236681  | 90240393  | TIGD2 (+204569), SNCA (+519753)      |
| chr3  | 71499999  | 71507918  | FOXP1 (-323971), EIF4E3 (+270567)    |
| chr6  | 159474643 | 159488174 | FNDC1 (-109020), TAGAP (-15225)      |
| chr5  | 53905928  | 53906557  | SNX18 (+92650), ESM1 (+375248)       |
| chr18 | 2641792   | 2642293   | SMCHD1 (-13694), NDC80 (+70533)      |
| chr21 | 46077888  | 46078389  | KRTAP12-4 (-3563), KRTAP12-3 (+290)  |
| chr10 | 3919311   | 3920311   | AKR1E2 (-948635), KLF6 (-92344)      |
| chr4  | 78114211  | 78116494  | CXCL13 (-317554), CCNG2 (+37049)     |
| chr8  | 27231840  | 27240371  | PTK2B (+67107), CHRNA2 (+100707)     |
| chr5  | 35853784  | 35854679  | IL7R (-2719)                         |
| chr6  | 157956243 | 157957704 | SNX9 (-287322), ZDHHC14 (+154809)    |
| chr2  | 112943583 | 112947475 | FBLN7 (+49567), ZC3H8 (+67159)       |
| chr14 | 91698131  | 91699157  | GPR68 (+21625), C14orf159 (+117930)  |
| chr18 | 2968151   | 2968854   | LPIN2 (+43442), EMILIN2 (+121475)    |
| chr1  | 25290864  | 25291671  | RUNX3 (+233)                         |
| chr22 | 24186917  | 24187418  | SLC2A11 (-11891), DERL3 (-5975)      |
| chr3  | 140984807 | 140987281 | ZBTB38 (-120610), ACPL2 (+35374)     |
| chr6  | 143234678 | 143235179 | HIVEP2 (+31409), GPR126 (+611863)    |
| chr16 | 89826373  | 89832390  | ZNF276 (+41430), FANCA (+53672)      |
| chr1  | 117280415 | 117281933 | IGSF3 (-70860), CD2 (-15833)         |
| chr21 | 32531910  | 32532411  | KRTAP19-8 (-121366), TIAM1 (+399129) |
| chr8  | 134069523 | 134070217 | SLA (+2733), TG (+190664)            |
| chr3  | 187691411 | 187694767 | LPP (-237632), BCL6 (-229574)        |
| chr5  | 75838150  | 75840354  | F2RL2 (+80007), IQGAP2 (+140178)     |
| chr1  | 117299288 | 117300087 | PTGFRN (-152991), CD2 (+2681)        |
| chr16 | 11326610  | 11328178  | SOCS1 (+22642), CIITA (+356339)      |
| chr12 | 838082    | 838789    | NINJ2 (-65491), WNK1 (-23653)        |
| chr18 | 42339339  | 42340034  | SLC14A2 (-855079), SETBP1 (+78824)   |
| chr22 | 20816697  | 20821237  | SCARF2 (-26821), KLHL22 (+31203)     |
| chr3  | 186742777 | 186744028 | ST6GAL1 (+95129), RPL39L (+113908)   |
| chr13 | 49720783  | 49721674  | MLNR (-73245), FNDC3A (+171181)      |

|       |           |           |                                           |
|-------|-----------|-----------|-------------------------------------------|
| chr3  | 111261124 | 111261625 | CD96 (+410)                               |
| chr1  | 209931251 | 209932089 | TRAF3IP3 (-173)                           |
| chr15 | 63790566  | 63791331  | CA12 (-116589), USP3 (-5861)              |
| chr3  | 27521319  | 27522240  | SLC4A7 (-23535), EOMES (+242209)          |
| chr9  | 130482072 | 130482573 | PTRH1 (+4829), STXBP1 (+107779)           |
| chr9  | 80091094  | 80091893  | GNA14 (+171729), VPS13A (+299133)         |
| chr16 | 57622389  | 57629119  | GPR56 (-36665), GPR114 (+49153)           |
| chr2  | 204735016 | 204736349 | ICOS (-65788), CTLA4 (+3174)              |
| chr1  | 155916098 | 155916913 | RXFP4 (+5026), ARHGEF2 (+31812)           |
| chr15 | 60875400  | 60876780  | NARG2 (-104746), RORA (+43572)            |
| chr14 | 65753685  | 65754352  | MAX (-184831), FUT8 (-123291)             |
| chr6  | 53096674  | 53097175  | GCM1 (-83298), ELOVL5 (+116823)           |
| chr1  | 115641629 | 115643205 | TSPAN2 (-10332), NGF (+238440)            |
| chr22 | 20911343  | 20912034  | SERPIND1 (-216478), MED15 (+49792)        |
| chr1  | 167486449 | 167487874 | CD247 (+613)                              |
| chr4  | 40200925  | 40202457  | CHRNA9 (-135655), RHOH (+3164)            |
| chr15 | 64183125  | 64187145  | HERC1 (-59048), DAPK2 (+147331)           |
| chr21 | 46498037  | 46499003  | ADARB1 (+4027), POFUT2 (+209293)          |
| chr14 | 22976227  | 22976728  | DAD1 (+81697), OR4E2 (+843181)            |
| chr17 | 56421170  | 56422568  | BZRAP1 (-16424), SUPT4H1 (+7694)          |
| chr2  | 189848356 | 189849978 | COL3A1 (+10121), COL5A2 (+195438)         |
| chr2  | 68964583  | 68965378  | ARHGAP25 (+3014), BMP10 (+133668)         |
| chr5  | 100224131 | 100228882 | ST8SIA4 (+12463), FAM174A (+355498)       |
| chr17 | 55680085  | 55681365  | ENSG00000166329 (+141948), MSI2 (+346830) |
| chr1  | 53877500  | 53879077  | LRP8 (-84603), DMRTB1 (-46783)            |
| chr9  | 134107393 | 134115052 | PPAPDC3 (-53858), NUP214 (+110275)        |
| chr20 | 42696859  | 42700417  | JPH2 (+117580), TOX2 (+155146)            |
| chr4  | 122101662 | 122104855 | NDNF (-109586), TNIP3 (+45362)            |
| chr17 | 72456189  | 72468245  | CD300A (-338)                             |
| chr13 | 100004564 | 100005065 | TM9SF2 (-148856), GPR183 (-45156)         |
| chr9  | 99161198  | 99161699  | SLC35D2 (-15470), ZNF367 (+19162)         |
| chr1  | 117293783 | 117294284 | CD2 (-2973)                               |
| chr1  | 114409832 | 114418604 | PTPN22 (+163)                             |
| chr1  | 203575533 | 203576885 | ATP2B4 (-19480), OPTC (+112938)           |
| chr1  | 158898831 | 158905026 | PYHIN1 (+587)                             |
| chr2  | 97578809  | 97579600  | SEMA4C (-43497), FAHD2B (+181371)         |
| chr17 | 80842766  | 80844381  | ZNF750 (-45120), B3GNTL1 (+166112)        |
| chr1  | 111754555 | 111772794 | CHIA (-69863), CHI3L2 (+20282)            |
| chr1  | 53096959  | 53104969  | FAM159A (+1948), ECHDC2 (+286475)         |
| chr11 | 128494578 | 128495716 | FLI1 (-68743), ETS1 (-37710)              |
| chr12 | 7058161   | 7058662   | PTPN6 (-2022)                             |
| chr5  | 35849869  | 35864252  | IL7R (+110)                               |
| chr17 | 4948010   | 4955044   | ZFP3 (-30016), SLC52A1 (-12800)           |
| chr14 | 99691943  | 99692773  | BCL11B (+45207)                           |
| chr17 | 65432046  | 65432547  | NOL11 (-281652), PITPNC1 (+58026)         |
| chr16 | 68449932  | 68452548  | SMPD3 (+31351), PRMT7 (+106203)           |
| chr11 | 60738983  | 60740580  | CD6 (+630)                                |
| chr4  | 2292290   | 2293701   | MXD4 (-28975), ZFYVE28 (+127394)          |
| chr16 | 68104167  | 68104668  | DDX28 (-46648), NFATC3 (-15143)           |
| chr11 | 118203704 | 118219102 | CD3G (-3668), CD3D (+2056)                |
| chr11 | 128173176 | 128173677 | ETS1 (+284010)                            |
| chr12 | 10101366  | 10101867  | CLEC12A (-2298)                           |
| chr15 | 22459491  | 22469012  | TUBGCP5 (-369143), OR4N4 (+81870)         |
| chr1  | 90320406  | 90321047  | ZNF326 (-139947), LRR8D (+34136)          |
| chr1  | 168408708 | 168409209 | XCL2 (+104276), TBX19 (+158681)           |
| chr12 | 29255144  | 29258680  | FAR2 (-119686), CCDC91 (+913533)          |

|       |           |           |                                           |
|-------|-----------|-----------|-------------------------------------------|
| chr22 | 26988450  | 26988951  | TPST2 (-2574)                             |
| chr17 | 75435395  | 75438444  | TNRC6C (-564217), SEPT9 (+159428)         |
| chr17 | 33863857  | 33865691  | SLFN12L (-49898), SLFN14 (+20343)         |
| chr1  | 89662859  | 89667606  | GBP4 (-618)                               |
| chr2  | 216921259 | 216923918 | MREG (-44243), PECR (+23950)              |
| chr14 | 72917641  | 72918770  | DPF3 (+442603), RGS6 (+519050)            |
| chr19 | 7409061   | 7416913   | ENSG00000263264 (-861)                    |
| chr2  | 237453109 | 237458665 | IQCA1 (-39702), ACKR3 (-22397)            |
| chr5  | 75975493  | 75976414  | F2RL2 (-56695), F2R (-35914)              |
| chr17 | 45736794  | 45738498  | TBKBP1 (-34984), KPNB1 (+10442)           |
| chr17 | 44096663  | 44098892  | STH (+21162), KANSL1 (+172388)            |
| chr8  | 126959012 | 126959513 | TRIB1 (+516700), FAM84B (+611375)         |
| chr1  | 90071762  | 90075039  | LRR8C (-25230), LRR8B (+82939)            |
| chr1  | 26316761  | 26317951  | STMN1 (-84399), PAFAH2 (+7292)            |
| chr7  | 149565507 | 149566226 | ATP6V0E2 (-4190)                          |
| chr3  | 177255706 | 177256962 | TBL1XR1 (-342068)                         |
| chr1  | 150081980 | 150083765 | PLEKHO1 (-39297), VPS45 (+43504)          |
| chrX  | 10079168  | 10079669  | CLCN4 (-45605), ENSG00000234469 (+144027) |
| chr16 | 29673520  | 29677442  | SPN (+901)                                |
| chr14 | 62136735  | 62138823  | HIF1A (-26561), PRKCH (+349344)           |
| chr18 | 2959755   | 2962516   | LPIN2 (+50809), EMILIN2 (+114108)         |
| chr6  | 138226202 | 138226703 | TNFAIP3 (+37872), PERP (+202195)          |
| chr1  | 26640359  | 26649415  | UBXN11 (-33), CD52 (+439)                 |
| chr1  | 198607448 | 198607949 | PTPRC (-471)                              |
| chr2  | 64953187  | 64955715  | SLC1A4 (-262084), SERTAD2 (-73404)        |
| chr12 | 46612282  | 46614577  | SCAF11 (-229082), SLC38A1 (+49365)        |
| chr17 | 33567399  | 33567900  | SLFN5 (-2405)                             |
| chr3  | 71534090  | 71548628  | FOXP1 (-361371), EIF4E3 (+233167)         |
| chr2  | 136894357 | 136895685 | THSD7B (-744728), CXCR4 (-21208)          |
| chr9  | 130782187 | 130797997 | DPM2 (-89329), NAIF1 (+39508)             |
| chr14 | 23036296  | 23036797  | DAD1 (+21628), OR4E2 (+903250)            |
| chr3  | 54462879  | 54463781  | CACNA2D3 (+306637), LRTM1 (+498771)       |
| chr13 | 41351401  | 41352056  | SLC25A15 (-11904), MRPS31 (-6420)         |
| chr1  | 209917955 | 209934392 | TRAF3IP3 (-5669), HSD11B1 (+66664)        |
| chr7  | 142490731 | 142512086 | EPHB6 (-51383), PRSS1 (+44079)            |
| chr2  | 148419931 | 148422487 | ACVR2A (-180877)                          |
| chr12 | 122936380 | 122939221 | CLIP1 (-72760), ZCCHC8 (+47717)           |
| chr14 | 64116061  | 64119973  | PPP2R5E (-107925), SGPP1 (+76740)         |
| chr2  | 97010757  | 97011258  | ARID5A (-191478), NCAPH (+9483)           |
| chr4  | 26887850  | 26888516  | STIM2 (+25720)                            |
| chr21 | 15961239  | 15966422  | SAMSN1 (-8108), NRIP1 (+473490)           |
| chr5  | 163341943 | 163344518 | MAT2B (+410677)                           |
| chr14 | 91716015  | 91717882  | GPR68 (+3320), C14orf159 (+136235)        |
| chr10 | 97595339  | 97597959  | CCNJ (-206691), ENTPD1 (+81240)           |
| chr7  | 30360451  | 30362806  | ZNRF2 (+37706), NOD1 (+156767)            |
| chr14 | 53206858  | 53212999  | STYX (+13029), GNPAT1 (+48390)            |
| chr16 | 57168488  | 57169670  | FAM192A (+50897), NLRC5 (+145669)         |
| chr11 | 12214700  | 12230377  | MICALCL (-85908), MICAL2 (+90401)         |
| chr17 | 75662055  | 75664746  | TNRC6C (-337736), SEPT9 (+385909)         |
| chr11 | 73706284  | 73706785  | UCP2 (-12183), UCP3 (+13945)              |
| chr18 | 2632691   | 2645506   | SMCHD1 (-16638), NDC80 (+67589)           |
| chr16 | 27210440  | 27211810  | KDM8 (-4171)                              |
| chr15 | 73031454  | 73033658  | ADPGK (+43570), BBS4 (+54028)             |
| chr16 | 22368253  | 22368754  | CDR2 (+17434), POLR3E (+59774)            |
| chr12 | 90255073  | 90260047  | ATP2B1 (-154952)                          |
| chr5  | 156997729 | 156998896 | ADAM19 (+4470), NIPAL4 (+111286)          |

|       |           |           |                                      |
|-------|-----------|-----------|--------------------------------------|
| chr6  | 154561441 | 154572436 | IPCEF1 (+84276), OPRM1 (+235303)     |
| chr3  | 33101537  | 33102038  | TMPPE (+36505), CCR4 (+108722)       |
| chr5  | 14590259  | 14599435  | FAM105B (-70010), TRIO (+451036)     |
| chr7  | 3083047   | 3083994   | CARD11 (+58)                         |
| chr6  | 5173355   | 5176598   | LYRM4 (+86195), PPP1R3G (+89257)     |
| chr20 | 35642143  | 35645654  | SAMHD1 (-63653), RBL1 (+80499)       |
| chr16 | 4538439   | 4539333   | NMRAL1 (-12579), CDIP1 (+26224)      |
| chr2  | 233174928 | 233175839 | ALPP (-67860), DIS3L2 (+349091)      |
| chr14 | 61799211  | 61801737  | HIF1A (-363866), PRKCH (+12039)      |
| chr17 | 17305800  | 17310022  | MED9 (-72389), NT5M (+101262)        |
| chr16 | 30563514  | 30564015  | ZNF747 (-17097), ZNF764 (+5819)      |
| chr10 | 70963128  | 70963629  | HKDC1 (-16680), SUPV3L1 (+23391)     |
| chr9  | 80815941  | 80816442  | GNAQ (-169818), CEP78 (-34931)       |
| chr18 | 72705029  | 72709181  | ZADH2 (+214198), ZNF407 (+364129)    |
| chr11 | 6763112   | 6769860   | MRPL17 (-61854), OR2AG2 (+23800)     |
| chr22 | 37566270  | 37566953  | IL2RB (-20582), C1QTNF6 (+17717)     |
| chr15 | 85139855  | 85142966  | ZSCAN2 (-2825)                       |
| chr2  | 113926159 | 113926660 | PSD4 (-5138), IL1RN (+50936)         |
| chr12 | 92985240  | 93000594  | PLEKHG7 (-137394), CLLU1 (+175182)   |
| chr7  | 50342941  | 50362900  | IKZF1 (+4603), FIGNL1 (+164501)      |
| chr7  | 127054339 | 127054973 | ZNF800 (-21911), GCC1 (+171005)      |
| chr19 | 4109114   | 4109777   | ZBTB7A (-42503), MAP2K2 (+14680)     |
| chrX  | 2595195   | 2595696   | DHRX (-176427), CD99 (-13774)        |
| chr9  | 123894539 | 123896353 | CNTRL (+58156), RAB14 (+68701)       |
| chr3  | 187716257 | 187719873 | BCL6 (-254550), LPP (-212656)        |
| chr1  | 160764732 | 160771637 | LY9 (+2237), CD244 (+64365)          |
| chr3  | 177254529 | 177258762 | TBL1XR1 (-342380)                    |
| chr5  | 95204076  | 95207203  | GLRX (-47222), ELL2 (+92135)         |
| chr6  | 143176425 | 143177124 | HIVEP2 (+89563), GPR126 (+553709)    |
| chr2  | 68991151  | 68992164  | ARHGAP25 (+29691), BMP10 (+106991)   |
| chr18 | 3058772   | 3059273   | LPIN2 (-47078), MYOM1 (+161083)      |
| chr17 | 70722973  | 70723474  | SLC39A11 (+365603), SOX9 (+606063)   |
| chr6  | 144674295 | 144675812 | UTRN (+62089)                        |
| chr11 | 128385873 | 128386374 | ETS1 (+71313)                        |
| chr14 | 91692704  | 91693427  | GPR68 (+27203), C14orf159 (+112352)  |
| chr2  | 29233765  | 29235603  | C2orf71 (+62443), WDR43 (+117175)    |
| chr16 | 29020169  | 29020797  | LAT (+24336), NPIP11 (+394867)       |
| chr15 | 44958344  | 44958984  | SPG11 (-2802)                        |
| chr12 | 3979361   | 3979862   | EFCAB4B (-117344), PARP11 (+2928)    |
| chr4  | 6900194   | 6902707   | TBC1D14 (-10121), KIAA0232 (+116984) |
| chr11 | 118098395 | 118099171 | AMICA1 (-2974)                       |
| chr2  | 37842878  | 37843979  | CDC42EP3 (+55905), QPCT (+271712)    |
| chr4  | 25939828  | 25940690  | RBPJ (-381073), SMIM20 (+24433)      |
| chrX  | 13031697  | 13032332  | FAM9C (+30706), TMSB4X (+38786)      |
| chr18 | 9082843   | 9084673   | NDUFV2 (-18870), SOGA2 (+366389)     |
| chr2  | 109646233 | 109651772 | SH3RF3 (-96994), EDAR (-43175)       |
| chr2  | 101977799 | 101978430 | RNF149 (-52957), CREG2 (+25942)      |
| chr2  | 45405554  | 45406055  | SIX2 (-169236), SRBD1 (+432615)      |
| chr11 | 118071015 | 118105812 | SCN2B (-41026), AMICA1 (+7395)       |
| chr6  | 25033348  | 25044521  | LRR16A (-240721), FAM65B (-127740)   |
| chr5  | 39188764  | 39189265  | RICTOR (-114505), FYB (+81744)       |
| chr1  | 206976974 | 206977631 | IL20 (-61396), IL19 (+5088)          |
| chr6  | 33870147  | 33876929  | MLN (-101750), GRM4 (+227905)        |
| chr1  | 93507272  | 93508960  | FAM69A (-81059), MTF2 (-36679)       |
| chr12 | 47700588  | 47701955  | AMIGO2 (-227624), RPAP3 (+398572)    |
| chr5  | 49885070  | 49891998  | EMB (-151333), PARP8 (-74238)        |



|       |           |           |                                     |
|-------|-----------|-----------|-------------------------------------|
| chr12 | 109873494 | 109873995 | KCTD10 (+41604), MYO1H (+88037)     |
| chr1  | 89533450  | 89537026  | GBP1 (-4195)                        |
| chr17 | 56234433  | 56234934  | OR4D2 (-12333), OR4D1 (+2190)       |
| chr6  | 31539866  | 31540797  | TNF (-3012), LTA (+501)             |
| chr12 | 121470323 | 121477632 | OASL (+3067), HNF1A (+57632)        |
| chr21 | 35347901  | 35349927  | MRPS6 (-96909), ATP5O (-60630)      |
| chr1  | 203733078 | 203733579 | LAX1 (-975)                         |
| chr2  | 68616021  | 68616522  | APLF (-78421), PLEK (+23967)        |
| chr2  | 109964637 | 109966452 | SH3RF3 (+219548), SEPT10 (+406238)  |
| chr12 | 91430612  | 91431113  | EPYC (-32060), KERA (+20897)        |
| chr10 | 8444637   | 8445138   | GATA3 (+348232)                     |
| chr21 | 35319456  | 35324763  | MRPS6 (-123713), ATP5O (-33826)     |
| chr1  | 29253778  | 29254446  | EPB41 (+40509), TMEM200B (+194901)  |
| chr12 | 92420381  | 92432040  | DCN (-849311), BTG1 (+113462)       |
| chrX  | 1775688   | 1777717   | ASMT (+42809), ZBED1 (+642305)      |
| chr16 | 27412749  | 27414054  | IL21R (-81)                         |
| chr2  | 106709037 | 106715154 | C2orf40 (+29984), UXS1 (+98699)     |
| chrX  | 13092201  | 13115852  | FAM9C (-41306), ATXN3L (+234491)    |
| chr7  | 157264721 | 157265222 | DNAJB6 (+135312)                    |
| chr14 | 61796735  | 61797590  | HIF1A (-367177), PRKCH (+8728)      |
| chr3  | 114014964 | 114015930 | TIGIT (+5498), ZBTB20 (+87041)      |
| chr12 | 110516365 | 110518586 | IFT81 (-44706), C12orf76 (-11976)   |
| chr7  | 55598922  | 55607522  | VOPP1 (+36996), LANCL2 (+170081)    |
| chr15 | 74687650  | 74697107  | CYP11A1 (-32298), SEMA7A (+34429)   |
| chr20 | 47336295  | 47336796  | SULF2 (-921216), PREX1 (+107874)    |
| chr14 | 106470950 | 106472555 | TMEM121 (+478813)                   |
| chr10 | 22970858  | 22971359  | PIP4K2A (+32375), SPAG6 (+336710)   |
| chr13 | 41057338  | 41062331  | FOXO1 (+180899), COG6 (+830021)     |
| chr14 | 97427845  | 97431184  | VRK1 (+165874)                      |
| chr16 | 57066454  | 57081705  | NLRC5 (+50670), FAM192A (+145896)   |
| chr4  | 40198251  | 40200193  | RHOH (+695)                         |
| chr1  | 205409695 | 205410495 | CDK18 (-63631), LEMD1 (-18913)      |
| chr11 | 72868217  | 72869496  | P2RY2 (-60487), FCHSD2 (-15551)     |
| chr1  | 160805499 | 160810013 | CD244 (+24794), LY9 (+41808)        |
| chr19 | 10519100  | 10520700  | PDE4A (-11431), CDC37 (-5691)       |
| chr3  | 56832880  | 56833671  | CCDC66 (+242075), ARHGFE3 (+280060) |
| chr1  | 160487607 | 160494741 | SLAMF6 (+1869), VANGL2 (+120798)    |
| chr11 | 122596830 | 122600108 | CRTAM (-110739), UBASH3B (+72086)   |
| chr2  | 86810180  | 86812518  | RNF103 (+39629), KDM3A (+143425)    |
| chr14 | 23037694  | 23038479  | DAD1 (+20088), OR4E2 (+904790)      |
| chr17 | 2169074   | 2169575   | SRR (-37673), HIC1 (+209721)        |
| chr2  | 61218873  | 61221232  | PEX13 (-24804), REL (+111397)       |
| chr4  | 143338090 | 143338719 | INPP4B (+429038), IL15 (+780650)    |
| chr17 | 33538391  | 33549200  | SLFN5 (-26259), SLC35G3 (-22384)    |
| chr20 | 38252495  | 38253496  | DHX35 (+662018)                     |
| chr14 | 61793291  | 61795749  | HIF1A (-369820), PRKCH (+6085)      |
| chr4  | 81094209  | 81094844  | ANTXR2 (-100810), PRDM8 (-11897)    |
| chr10 | 47640140  | 47640775  | AGAP10 (-400720), ANTXRL (-17776)   |
| chr5  | 75621802  | 75622702  | IQGAP2 (-76822), SV2C (+243255)     |
| chr9  | 136541673 | 136542174 | DBH (+40442), SARDH (+63118)        |
| chr5  | 118676150 | 118677240 | TNFAIP8 (-13314)                    |
| chr2  | 234330749 | 234331250 | DGKD (+67847), USP40 (+143236)      |
| chr15 | 81583807  | 81586997  | STARD5 (+31064), IL16 (+67661)      |
| chr6  | 37469955  | 37470709  | CCDC167 (-2634)                     |
| chr2  | 98333447  | 98334847  | ZAP70 (+4124), TMEM131 (+278207)    |
| chr11 | 117843157 | 117888557 | TMPRSS4 (-81947), IL10RA (+8794)    |

|       |           |           |                                      |
|-------|-----------|-----------|--------------------------------------|
| chr19 | 15624554  | 15626696  | CYP4F3 (-126084), CYP4F22 (+6321)    |
| chr17 | 72737675  | 72738176  | SLC9A3R1 (-6865), RAB37 (+4870)      |
| chr3  | 156199087 | 156204885 | SSR3 (+70987), KCNAB1 (+363649)      |
| chr3  | 33082420  | 33106830  | TMPPE (+43668), CCR4 (+101559)       |
| chr2  | 25781088  | 25781938  | DNMT3A (-216054), DTNB (+114990)     |
| chr1  | 160490129 | 160490630 | SLAMF6 (+2663), VANGL2 (+120004)     |
| chr6  | 52169399  | 52171360  | PAQR8 (-56546), MCM3 (-20745)        |
| chr1  | 92950756  | 92951421  | GFI1 (-1578)                         |
| chr6  | 139851698 | 139852199 | CITED2 (-156192)                     |
| chr22 | 50319147  | 50320049  | PIM3 (-34563), CRELD2 (+7315)        |
| chrX  | 135860321 | 135864451 | ARHGEF6 (+1861), CD40LG (+132034)    |
| chr13 | 42064994  | 42069697  | RGCC (+35651), VWAA8 (+467874)       |
| chr11 | 118086346 | 118086847 | SCN2B (-39209), AMICA1 (+9212)       |
| chr17 | 29821753  | 29822254  | RAB11FIP4 (+103362), COPRS (+364352) |
| chr17 | 266073    | 266704    | RPH3AL (-63791), FAM101B (+29341)    |
| chr5  | 100225324 | 100226967 | ST8SIA4 (+12824), FAM174A (+355137)  |
| chr11 | 128347116 | 128347617 | ETS1 (+110070)                       |
| chr17 | 33857247  | 33871500  | SLFN12L (-49498), SLFN14 (+20743)    |
| chr2  | 196420577 | 196431626 | SLC39A10 (-95369)                    |
| chr6  | 81134282  | 81134783  | BCKDHB (+318169)                     |
| chr2  | 122455932 | 122459813 | CLASP1 (-50821), MKI67IP (+36626)    |
| chr16 | 79320394  | 79320895  | MAF (+313966)                        |
| chr2  | 37826887  | 37828247  | CDC42EP3 (+71767), QPCT (+255850)    |
| chr1  | 198608740 | 198610199 | PTPRC (+1300)                        |
| chr12 | 8797183   | 8797684   | AICDA (-31967), MFAP5 (+17974)       |
| chr6  | 35579219  | 35579720  | TULP1 (-98755), FKBP5 (+116890)      |
| chr7  | 7296546   | 7299967   | C1GALT1 (+76011), COL28A1 (+277227)  |
| chr7  | 149562190 | 149563385 | ATP6V0E2 (-7269), ZNF862 (+27332)    |
| chr12 | 57869128  | 57876120  | ARHGAP9 (+1009), GLI1 (+18703)       |
| chr1  | 224811481 | 224811982 | DNAH14 (-305637), CNIH3 (+7737)      |
| chr13 | 75900309  | 75900810  | TBC1D4 (+155690)                     |
| chr14 | 61918311  | 61918812  | HIF1A (-245778), PRKCH (+130127)     |
| chr17 | 3666922   | 3667423   | ITGAE (+37364), GSG2 (+39962)        |
| chr17 | 74139160  | 74143488  | FOXJ1 (-3944)                        |
| chr22 | 20817760  | 20818999  | SCARF2 (-26234), KLHL22 (+31790)     |
| chr14 | 98069609  | 98071417  | VRK1 (+806872)                       |
| chr1  | 89534344  | 89536161  | GBP1 (-4210)                         |
| chr14 | 24078372  | 24081567  | JPH4 (-31976), DHRS2 (-25612)        |
| chr17 | 33376821  | 33380645  | RFFL (+37605), LIG3 (+71220)         |
| chr5  | 109389561 | 109390062 | MAN2A1 (+364745), TMEM232 (+672554)  |
| chr1  | 109187595 | 109188237 | HENMT1 (+16232), NBPF6 (+269495)     |
| chr20 | 42697351  | 42697852  | JPH2 (+118616), TOX2 (+154110)       |
| chr13 | 27295920  | 27296421  | GPR12 (+38751), WASF3 (+164284)      |
| chr6  | 42742356  | 42744208  | RPL7L1 (-104091), TBCC (-28724)      |
| chr21 | 19155924  | 19156717  | CHODL (-460829), BTG3 (-171159)      |
| chr12 | 94601724  | 94602225  | PLXNC1 (+59476), CCDC41 (+251753)    |
| chr16 | 89550297  | 89550934  | ANKRD11 (+6353), ZNF778 (+266498)    |
| chr15 | 85859455  | 85860223  | AKAP13 (-64121), PDE8A (+336168)     |
| chr19 | 38539307  | 38539962  | SIPA1L3 (+141767), DPF1 (+175255)    |
| chr11 | 36397309  | 36399617  | PRR5L (+908)                         |
| chr3  | 16883801  | 16884863  | DAZL (-238035), PLCL2 (-42120)       |
| chr17 | 33813420  | 33815965  | SLFN12L (+183)                       |
| chr3  | 113932074 | 113933947 | DRD3 (-35112), ZNF80 (+23414)        |
| chr12 | 57869708  | 57874867  | ARHGAP9 (+1345), GLI1 (+18367)       |
| chr6  | 19719654  | 19720155  | ID4 (-117712)                        |
| chr6  | 112348470 | 112348971 | FYN (-154066), WISP3 (-26741)        |

|       |           |           |                                           |
|-------|-----------|-----------|-------------------------------------------|
| chr17 | 66180308  | 66180809  | AMZ2 (-63156), KPNA2 (+148483)            |
| chr17 | 46506909  | 46507557  | SKAP1 (+319)                              |
| chr3  | 10282465  | 10286253  | TATDN2 (-5348), IRAK2 (+77810)            |
| chr16 | 29611331  | 29612097  | SPN (-62866), SULT1A4 (+143934)           |
| chr16 | 78775328  | 78778182  | WVOX (+643445), MAF (+857856)             |
| chr16 | 84640908  | 84641619  | TLDC1 (-102900), COTL1 (+10419)           |
| chr8  | 145002185 | 145003845 | EPPK1 (-50383), PLEC (+22029)             |
| chr16 | 89827906  | 89828407  | ZNF276 (+40205), FANCA (+54897)           |
| chr10 | 63998238  | 63998739  | RTKN2 (+29977), ARID5B (+337430)          |
| chr2  | 154999804 | 155000305 | KCNJ3 (-554756), GALNT13 (+271629)        |
| chr15 | 38962988  | 38963489  | THBS1 (-910055), RASGRP1 (-106232)        |
| chrX  | 13105792  | 13106705  | FAM9C (-43528), ATXN3L (+232269)          |
| chr6  | 159463139 | 159465219 | EZR (-223735), TAGAP (+2005)              |
| chr2  | 85064872  | 85078493  | TRABD2A (+36686), DNAH6 (+328104)         |
| chr1  | 159035905 | 159040682 | AIM2 (+8397), IFI16 (+58612)              |
| chr2  | 158298305 | 158300545 | ERMN (-115200), CYTIP (+1229)             |
| chr1  | 156494515 | 156495016 | MEF2D (-24146), IQGAP3 (+47566)           |
| chr1  | 92014195  | 92014696  | CDC7 (+47781), TGFBR3 (+337341)           |
| chr13 | 42965584  | 42972633  | TNFSF11 (-179180), AKAP11 (+122820)       |
| chr1  | 192486064 | 192486565 | RGS1 (-58542), RGS21 (+200193)            |
| chr12 | 14569533  | 14571583  | ATF7IP (+51942), PLBD1 (+150725)          |
| chr6  | 167362904 | 167364731 | RPS6KA2 (-87779), RNASET2 (+6372)         |
| chr15 | 75896512  | 75901528  | PTPN9 (-27390), SNUPN (+19009)            |
| chr5  | 76033283  | 76034726  | F2RL1 (-80797), F2R (+22137)              |
| chr6  | 146187712 | 146188213 | FBXO30 (-52074), SHPRH (+97562)           |
| chr2  | 37826192  | 37829797  | CDC42EP3 (+71339), QPCT (+256278)         |
| chr2  | 242805171 | 242805672 | PDCD1 (-4362)                             |
| chr4  | 7828784   | 7830898   | PSAPL1 (-393141), AFAP1 (+111812)         |
| chr3  | 46578608  | 46582562  | TDGF1 (-38142), RTP3 (+41604)             |
| chr10 | 30994309  | 30994943  | LYZL2 (-75935), ZNF438 (+326240)          |
| chr19 | 42390602  | 42391797  | ARHGEF1 (+2685), RABAC1 (+72342)          |
| chr1  | 160508130 | 160513413 | SLAMF6 (-17729), CD84 (+38522)            |
| chr3  | 59433521  | 59439773  | FAM3D (-784072)                           |
| chr3  | 130183678 | 130184341 | COL6A6 (-95168), COL6A5 (+119651)         |
| chr1  | 202134305 | 202135131 | PTPN7 (-4009)                             |
| chr5  | 146173703 | 146174204 | GPR151 (-278201), PPP2R2B (+261583)       |
| chr7  | 42792929  | 42794131  | GLI3 (-516918), ENSG00000256646 (+178243) |
| chr9  | 31345779  | 31349338  | NONE                                      |
| chr6  | 167454102 | 167457063 | CCR6 (-80674), FGFR1OP (+42913)           |
| chr16 | 68449707  | 68453773  | SMPD3 (+30851), PRMT7 (+106703)           |
| chr10 | 33424800  | 33425458  | ITGB1 (-178307), NRP1 (+200061)           |
| chr18 | 29618159  | 29624355  | RNF138 (-50561), RNF125 (+22922)          |
| chr19 | 19708560  | 19709264  | PBX4 (+20813), CILP2 (+59855)             |
| chr7  | 142507272 | 142507773 | EPHB6 (-45269), PRSS1 (+50193)            |
| chr10 | 129894103 | 129894604 | MKI67 (+30295), PTPRE (+189029)           |
| chr2  | 54221418  | 54221919  | ACYP2 (-120972), PSME4 (-23692)           |
| chr10 | 26724566  | 26732012  | PDSS1 (-258299), APBB1IP (+1157)          |
| chr1  | 151877519 | 151878918 | THEM5 (-52046), THEM4 (+4065)             |
| chrX  | 1581757   | 1582576   | ASMTL (-10401), P2RY8 (+73833)            |
| chr3  | 31267044  | 31268226  | GADL1 (-331378), STT3B (-306647)          |
| chr1  | 160525293 | 160552445 | SLAMF6 (-45826), CD84 (+10425)            |
| chr7  | 55600132  | 55602789  | VOPP1 (+38757), LANCL2 (+168320)          |
| chr6  | 159458726 | 159467254 | EZR (-222546), TAGAP (+3194)              |
| chr1  | 111172870 | 111192842 | KCNA2 (-32805), KCNA3 (+34799)            |
| chr3  | 195906030 | 195908480 | TFRC (-98195), ZDHHC19 (+31011)           |
| chr12 | 68021971  | 68027093  | DYRK2 (-17969), CAND1 (+361471)           |

|       |           |           |                                     |
|-------|-----------|-----------|-------------------------------------|
| chr5  | 39192766  | 39193267  | RICTOR (-118507), FYB (+77742)      |
| chr1  | 117293188 | 117316085 | PTGFRN (-148042), CD2 (+7630)       |
| chr9  | 126963640 | 126966262 | NEK6 (-55291), LHX2 (+191062)       |
| chr2  | 201248181 | 201248682 | SPATS2L (+77558), KCTD18 (+126354)  |
| chrX  | 1600072   | 1601051   | ASMTL (-28796), P2RY8 (+55438)      |
| chr2  | 242248743 | 242249388 | HDLBP (-36765), SEPT2 (-5449)       |
| chr1  | 232664947 | 232665448 | SIPA1L2 (+32106), DISC1 (+902637)   |
| chr22 | 24822945  | 24824702  | ADORA2A (+294)                      |
| chrX  | 47221156  | 47222272  | ZNF157 (-8268), USP11 (+129400)     |
| chr11 | 117150993 | 117152238 | BACE1 (+35356), RNF214 (+48164)     |
| chr14 | 98651278  | 98651779  | NONE                                |
| chr7  | 50351130  | 50352696  | IKZF1 (+3595), FIGNL1 (+165509)     |
| chr6  | 112071789 | 112076745 | TRAF3IP2 (-146818), FYN (+120388)   |
| chr13 | 84711261  | 84711924  | SLITRK1 (-255065)                   |
| chr4  | 90214292  | 90215155  | TIGD2 (+180756), SNCA (+543566)     |
| chr16 | 50714819  | 50715641  | SNX20 (+33)                         |
| chr19 | 8256936   | 8261756   | FBN3 (-44616), CERS4 (-14891)       |
| chr11 | 118208937 | 118210059 | CD3D (+3961), CD3E (+34238)         |
| chr9  | 95825246  | 95825747  | C9orf89 (-33003), SUSD3 (+4508)     |
| chr8  | 133991773 | 133992516 | SLA (+80458), TG (+112939)          |
| chr16 | 3675767   | 3676268   | DNASE1 (-25820), SLX4 (-14419)      |
| chr6  | 25056040  | 25057735  | LRRC16A (-222768), FAM65B (-145693) |
| chr2  | 39353595  | 39356005  | SOS1 (-6608), CDKL4 (+101873)       |
| chr1  | 227070339 | 227070975 | ADCK3 (-14580), PSEN2 (+12393)      |
| chr2  | 61046229  | 61046730  | REL (-62176), PAPOLG (+63115)       |
| chr11 | 48025676  | 48028082  | OR4B1 (-211465), PTPRJ (+24766)     |
| chr17 | 72732404  | 72742092  | SLC9A3R1 (-7543), RAB37 (+4192)     |
| chr6  | 159461621 | 159462122 | EZR (-221428), TAGAP (+4312)        |
| chr17 | 16890267  | 16894099  | MPRIP (-53891), TNFRSF13B (-16781)  |
| chr6  | 128272832 | 128273333 | THEMIS (-50857), PTPRK (+568645)    |
| chr11 | 117840867 | 117841648 | TMPRSS13 (-41178), IL10RA (-15805)  |
| chr19 | 47470788  | 47471945  | NPAS1 (-51710), ARHGAP35 (+49434)   |
| chr7  | 106506997 | 106507498 | PRKAR2B (-177846), PIK3CG (+1324)   |
| chr1  | 32292438  | 32292939  | SPOCD1 (-11037), PTP4A2 (+111299)   |
| chr2  | 70329991  | 70333689  | PCBP1 (+17255), TIA1 (+143933)      |
| chr10 | 14629416  | 14631042  | FRMD4A (-257346), CDNF (+249842)    |
| chr18 | 19262299  | 19263469  | ABHD3 (+21882), SNRPD1 (+70656)     |
| chr1  | 172786752 | 172790128 | FASLG (+160282), TNFSF18 (+231663)  |
| chr20 | 50021488  | 50022271  | KCNG1 (-382214), NFATC2 (+137378)   |
| chr2  | 204731153 | 204731853 | CTLA4 (-1006)                       |
| chr3  | 151909609 | 151924310 | MBNL1 (-68869), SUCNR1 (+325529)    |
| chr8  | 103064386 | 103064887 | NCALD (+72498), GRHL2 (+559977)     |
| chr8  | 134057834 | 134091103 | SLA (-1866)                         |
| chr15 | 63485527  | 63486245  | APH1B (-83867), RAB8B (+4218)       |
| chr17 | 10170744  | 10171245  | GAS7 (-69127), MYH13 (+105452)      |
| chr6  | 108061753 | 108062987 | SCML4 (+83146), SOBP (+251208)      |
| chrX  | 128901231 | 128920164 | SASH3 (-3262)                       |
| chr1  | 117296318 | 117296956 | CD2 (-370)                          |
| chr6  | 159484365 | 159484866 | FNDC1 (-105813), TAGAP (-18432)     |
| chr2  | 192070833 | 192071334 | STAT4 (-55098), MYO1B (-39031)      |
| chr19 | 47679359  | 47681411  | SAE1 (+46265), BBC3 (+55638)        |
| chr15 | 77285744  | 77286245  | PSTPIP1 (-1431)                     |
| chr11 | 121320419 | 121320920 | SORL1 (-2242)                       |
| chr1  | 111174613 | 111175114 | KCNA2 (-24813), KCNA3 (+42791)      |
| chr6  | 16699321  | 16701278  | ATXN1 (+61387), GMPR (+461489)      |
| chr8  | 129549065 | 129557723 | TMEM75 (-592803)                    |

|       |           |           |                                        |
|-------|-----------|-----------|----------------------------------------|
| chrX  | 78351674  | 78352175  | GPR174 (-74544), P2RY10 (+151007)      |
| chr7  | 38399373  | 38399874  | STARD3NL (+181800), AMPH (+271543)     |
| chr9  | 132650322 | 132651608 | USP20 (+53216), FNBP1 (+154476)        |
| chr8  | 19302336  | 19302837  | SH2D4A (+131459), CSGALNACT1 (+157419) |
| chr6  | 56803093  | 56803594  | DST (-295550), KIAA1586 (-108003)      |
| chr3  | 63953107  | 63955317  | PSMD6 (+55024), ATXN7 (+103979)        |
| chr21 | 19165596  | 19167125  | CHODL (-450789), BTG3 (-181199)        |
| chr5  | 35859343  | 35859844  | IL7R (+2643), CAPSL (+79287)           |
| chr8  | 126648207 | 126652139 | TRIB1 (+207610), FAM84B (+920465)      |
| chr4  | 40309483  | 40310341  | CHRNA9 (-27434), RHOH (+111385)        |
| chr10 | 74086678  | 74087179  | DNAJB12 (+27978), DDIT4 (+53251)       |
| chr7  | 50347582  | 50349477  | IKZF1 (+212)                           |
| chr2  | 113928945 | 113934800 | PSD4 (+325)                            |
| chr2  | 173360212 | 173361032 | PDK1 (-60157), ITGA6 (+68105)          |
| chr11 | 12244857  | 12247030  | MICALCL (-62503), MICAL2 (+113806)     |
| chr5  | 39775909  | 39776740  | PTGER4 (-903275), DAB2 (-351053)       |
| chr5  | 37197191  | 37199020  | C5orf42 (+51424), NIPBL (+321245)      |
| chr6  | 20318956  | 20321183  | MBOAT1 (-107440), E2F3 (-82328)        |
| chr3  | 114010071 | 114010572 | TIGIT (+373)                           |
| chr10 | 33395753  | 33429250  | ITGB1 (-165680), NRP1 (+212688)        |
| chr7  | 65760309  | 65760958  | KCTD7 (-445009), TPST1 (+90448)        |
| chr2  | 30555104  | 30561724  | LCLAT1 (-111709), LBH (+104017)        |
| chr2  | 29237027  | 29239404  | C2orf71 (+58911), WDR43 (+120707)      |
| chr17 | 7238186   | 7242037   | ACAP1 (+264)                           |
| chr2  | 98328731  | 98337931  | ZAP70 (+3308), TMEM131 (+279023)       |
| chr15 | 78338845  | 78345380  | LINGO1 (-417281), TBC1D2B (+27881)     |
| chr8  | 128987336 | 128989016 | TMEM75 (-27585)                        |
| chr3  | 56950039  | 56952371  | ARHGEF3 (+162131), CCDC66 (+360004)    |
| chr17 | 33373478  | 33374153  | RFFL (+42522), LIG3 (+66303)           |
| chr10 | 72361671  | 72363417  | PRF1 (-13)                             |
| chr2  | 12637607  | 12645285  | TRIB2 (-215569), LPIN1 (+823725)       |
| chr1  | 12147272  | 12150206  | TNFRSF1B (-78321), TNFRSF8 (+25305)    |
| chr2  | 38893187  | 38895506  | GALM (+1295), SRSF7 (+84289)           |
| chr13 | 24823698  | 24830525  | C1QTNF9 (-54192), SPATA13 (+273168)    |
| chr22 | 27038505  | 27039006  | CRYBA4 (+20828)                        |
| chr20 | 37500963  | 37503575  | FAM83D (-52686), PPP1R16B (+67921)     |
| chr16 | 28152386  | 28154206  | GSG1L (-78466), XPO6 (+69894)          |
| chr11 | 122611373 | 122621267 | CRTAM (-92888), UBASH3B (+89937)       |
| chr3  | 112388624 | 112398119 | CCDC80 (-33256), CD200R1L (+171425)    |
| chr8  | 29356670  | 29357432  | DUSP4 (-148866), TMEM66 (+583672)      |
| chr6  | 5174537   | 5175551   | LYRM4 (+86128), PPP1R3G (+89324)       |
| chr6  | 52171951  | 52173363  | PAQR8 (-54269), MCM3 (-23022)          |
| chr2  | 69875430  | 69875931  | AAK1 (-4832)                           |
| chr16 | 68390534  | 68391035  | PRMT7 (+45748), SMPD3 (+91806)         |
| chr20 | 62381022  | 62383422  | SLC2A4RG (+11008), ZBTB46 (+80345)     |
| chr19 | 35696310  | 35696811  | FAM187B (+23071), FXYS5 (+50885)       |
| chr2  | 112914158 | 112914659 | FBLN7 (+18447), ZC3H8 (+98279)         |
| chr16 | 88746842  | 88749461  | MVD (-18634), SNAI3 (+4749)            |
| chr19 | 10449552  | 10450587  | ICAM3 (+429)                           |
| chr6  | 139859226 | 139862674 | CITED2 (-165193)                       |
| chr13 | 40779782  | 40781809  | FOXO1 (+459938), COG6 (+550982)        |
| chr2  | 192065430 | 192073329 | STAT4 (-53394), MYO1B (-40735)         |
| chr19 | 10449189  | 10451326  | ICAM3 (+241)                           |
| chr6  | 20367549  | 20368199  | MBOAT1 (-155244), E2F3 (-34524)        |
| chr5  | 143565113 | 143572110 | YIPF5 (-18389), KCTD16 (-16228)        |
| chr1  | 168437139 | 168440735 | XCL2 (+74298), TBX19 (+188659)         |

|       |           |           |                                      |
|-------|-----------|-----------|--------------------------------------|
| chr21 | 30451866  | 30453177  | MAP3K7CL (-351)                      |
| chr9  | 100866057 | 100867338 | TRIM14 (+14782), NANS (+47677)       |
| chr21 | 35304069  | 35306039  | MRPS6 (-140769), ATP5O (-16770)      |
| chr11 | 3970072   | 3970573   | RRM1 (-145716), STIM1 (+93391)       |
| chr3  | 151957200 | 151966346 | MBNL1 (-24056), SUCNR1 (+370342)     |
| chr19 | 7414024   | 7414786   | ENSG00000263264 (+557)               |
| chr4  | 122102262 | 122103737 | NDNF (-109327), TNIP3 (+45621)       |
| chr11 | 95989176  | 95993871  | MTMR2 (-334065), MAML2 (+84820)      |
| chr22 | 38001124  | 38001625  | GGA1 (-3107)                         |
| chr12 | 32038448  | 32054118  | BICD1 (-213880), H3F3C (-101108)     |
| chr6  | 25027814  | 25028315  | LRRRC16A (-251591), FAM65B (-116870) |
| chr1  | 172626785 | 172633865 | FASLG (+2167), TNFSF18 (+389778)     |
| chr1  | 53103517  | 53104018  | FAM159A (+4752), ECHDC2 (+283671)    |
| chr2  | 235335081 | 235336717 | ARL4C (+69798), SPP2 (+376556)       |
| chr1  | 183925043 | 183926676 | APOBEC4 (-303412), COLGALT2 (+81003) |
| chr17 | 62965408  | 62966073  | LRRRC37A3 (-50838), GNA13 (+87216)   |
| chr14 | 88471473  | 88472796  | GPR65 (+667)                         |
| chr2  | 158266785 | 158278917 | ERMN (-88626), CYTIP (+27803)        |
| chr2  | 42524254  | 42524964  | COX7A2L (+71541), EML4 (+128119)     |
| chr2  | 190522649 | 190523366 | ASNSD1 (-3138)                       |
| chr6  | 13687747  | 13688248  | RANBP9 (+23798), NOL7 (+72439)       |
| chr1  | 206889632 | 206890133 | MAPKAPK2 (+31501), IL10 (+55956)     |
| chr2  | 106776072 | 106777906 | UXS1 (+33806), C2orf40 (+94877)      |
| chr2  | 97628414  | 97628915  | SEMA4C (-92957), FAHD2B (+131911)    |
| chr1  | 26699144  | 26699793  | ZNF683 (-203)                        |
| chr22 | 37559569  | 37560588  | IL2RB (-14049), C1QTNF6 (+24250)     |
| chr22 | 17697120  | 17697621  | CECR5 (-57204), CECR1 (+5508)        |
| chr2  | 122456522 | 122458761 | CLASP1 (-50590), MKI67IP (+36857)    |
| chr14 | 71463577  | 71469265  | SIPA1L1 (-529621), PCNX (+92299)     |
| chr5  | 118607470 | 118607971 | TNFAIP8 (-82288)                     |
| chr5  | 131438081 | 131440256 | CSF2 (+29686), P4HA2 (+124339)       |
| chr4  | 101941553 | 101942999 | EMCN (-503026), PPP3CA (+326361)     |
| chr8  | 100509977 | 100513092 | COX6C (+394755), VPS13B (+486041)    |
| chr4  | 154860927 | 154861428 | SFRP2 (-150906), DCHS2 (+451271)     |
| chr13 | 51488536  | 51489954  | SERPINE3 (-425923), RNASEH2B (+5431) |
| chr2  | 39353609  | 39358413  | SOS1 (-7819), CDKL4 (+100662)        |
| chr15 | 44975470  | 44976486  | B2M (-27697), PATL2 (-6892)          |
| chr16 | 57626078  | 57627652  | GPR56 (-35554), GPR114 (+50264)      |
| chr1  | 9688640   | 9690647   | PIK3CD (-22159), TMEM201 (+40664)    |
| chr7  | 142502051 | 142503604 | EPHB6 (-49964), PRSS1 (+45498)       |
| chr1  | 202126849 | 202135868 | PTPN7 (-650)                         |
| chr11 | 13943869  | 13947741  | FAR1 (+255588), RRAS2 (+434925)      |
| chr21 | 34587697  | 34588198  | IFNAR2 (-14331), OLIG1 (+145498)     |
| chr12 | 47664503  | 47665004  | AMIGO2 (-191106), RPAP3 (+435090)    |
| chr20 | 56192502  | 56200138  | ZBP1 (-791)                          |
| chr17 | 33849412  | 33849913  | SLFN12L (-34787), SLFN14 (+35454)    |
| chr3  | 71503771  | 71505762  | FOXP1 (-324779), EIF4E3 (+269759)    |
| chr12 | 9142227   | 9142728   | KLRG1 (+341)                         |
| chr20 | 25071908  | 25072409  | ENTPD6 (-104197), VSX1 (-9163)       |
| chr20 | 4645257   | 4647210   | ADRA1D (-416513), PRNP (-20648)      |
| chr3  | 186626931 | 186627432 | ST6GAL1 (-21092), ADIPOQ (+66719)    |
| chr4  | 185434290 | 185438004 | IRF2 (-40413), CASP3 (+134482)       |
| chr3  | 65006279  | 65006780  | ADAMTS9 (-332854)                    |
| chr4  | 40232853  | 40233819  | CHRNA9 (-104010), RHOH (+34809)      |
| chr9  | 129767260 | 129767761 | RALGPS1 (+90458), ANGPTL2 (+117651)  |
| chr6  | 37483145  | 37485460  | CCDC167 (-16605), MDGA1 (+181463)    |

|       |           |           |                                     |
|-------|-----------|-----------|-------------------------------------|
| chr10 | 104059867 | 104060560 | NFKB2 (-94140), GBF1 (+54925)       |
| chr16 | 81029734  | 81032284  | CDYL2 (-192783), CMC2 (+9710)       |
| chr11 | 13950821  | 13951499  | FAR1 (+260943), RRAS2 (+429570)     |
| chr20 | 47435037  | 47435538  | PREX1 (+9132)                       |
| chr13 | 46867725  | 46872799  | LCP1 (-84779), ESD (+501105)        |
| chr1  | 89736848  | 89737536  | GBP4 (-72577), GBP5 (+1352)         |
| chr1  | 25887642  | 25889625  | MAN1C1 (-55325), LDLRAP1 (+18563)   |
| chr19 | 42050144  | 42065104  | ATP5SL (-112180), CEACAM21 (-24977) |
| chr1  | 112133228 | 112149695 | ADORA3 (-95352), RAP1A (-20943)     |
| chr3  | 32474279  | 32475384  | CMTM7 (+41669), CMTM6 (+70068)      |
| chr2  | 112945868 | 112946369 | FBLN7 (+50157), ZC3H8 (+66569)      |
| chr5  | 39213446  | 39213947  | RICTOR (-139187), FYB (+57062)      |
| chr4  | 90226529  | 90227167  | TIGD2 (+192880), SNCA (+531442)     |
| chr5  | 67196845  | 67197346  | CD180 (-704469), PIK3R1 (-314452)   |
| chr7  | 114566155 | 114566656 | MDFIC (+4197)                       |
| chr6  | 33311931  | 33313351  | KIFC1 (-46672), DAXX (-21850)       |
| chr14 | 51772074  | 51773513  | FRMD6 (-345871), TMX1 (+65908)      |
| chr2  | 197121639 | 197136983 | STK17B (-93012), HECW2 (+328024)    |
| chr13 | 22633572  | 22638459  | FGF9 (+390494)                      |
| chr4  | 25860794  | 25862387  | SEL1L3 (+2990), SLC34A2 (+204125)   |
| chr6  | 5830808   | 5833715   | NRN1 (+174938), FARS2 (+570985)     |
| chrX  | 19816791  | 19818942  | MAP3K15 (-284488), SH3KBP1 (+87852) |
| chr18 | 2971100   | 2972839   | LPIN2 (+39975), EMILIN2 (+124942)   |
| chr19 | 35693779  | 35709585  | FAM187B (+17950), FXYD5 (+56006)    |
| chr16 | 84547957  | 84549382  | TLDC1 (-10306), COTL1 (+103013)     |
| chr2  | 99388111  | 99389937  | MGAT4A (-41435), TSGA10 (+382356)   |
| chr11 | 95430645  | 95434291  | SESN3 (-468107), FAM76B (+90487)    |
| chr2  | 33900     | 34401     | FAM110C (+12234)                    |
| chr19 | 47457133  | 47459732  | NPAS1 (-64644), ARHGAP35 (+36500)   |
| chr14 | 91784415  | 91785044  | GPR68 (-64461), CCDC88C (+99391)    |
| chr11 | 77912832  | 77913465  | USP35 (+13196), GAB2 (+215703)      |
| chr13 | 99703885  | 99704635  | UBAC2 (-148768), DOCK9 (-74016)     |
| chr16 | 3120078   | 3131692   | IL32 (+10500), ZSCAN10 (+16976)     |
| chr1  | 151867606 | 151872866 | THEM5 (-44063), THEM4 (+12048)      |
| chr11 | 13944601  | 13945246  | FAR1 (+254707), RRAS2 (+435806)     |
| chr13 | 41349741  | 41353708  | SLC25A15 (-11908), MRPS31 (-6416)   |
| chr5  | 156339767 | 156342020 | TIMD4 (+49372), SGCD (+587127)      |
| chr11 | 13946289  | 13946790  | FAR1 (+256323), RRAS2 (+434190)     |
| chr3  | 112389248 | 112397485 | CCDC80 (-33251), CD200R1L (+171430) |
| chr11 | 65693529  | 65697384  | SART1 (-33703), DRAP1 (+8729)       |
| chr10 | 6621064   | 6623000   | PRKCQ (+231)                        |
| chr3  | 51061236  | 51064451  | MANF (-359634), DOCK3 (+350172)     |
| chr15 | 77295594  | 77296608  | PSTPIP1 (+8675), TSPAN3 (+67469)    |
| chr13 | 52398786  | 52400975  | CCDC70 (-36236), DHRS12 (-21622)    |
| chr12 | 22548781  | 22550645  | ST8SIA1 (-62065), C2CD5 (+147767)   |
| chr10 | 22938602  | 22939103  | PIP4K2A (+64631), SPAG6 (+304454)   |
| chr12 | 67876768  | 67877690  | DYRK2 (-165272), CAND1 (+214168)    |
| chr10 | 127798899 | 127800050 | FANK1 (+214367), ADAM12 (+277549)   |
| chr22 | 22120734  | 22121386  | YPEL1 (-30937), MAPK1 (+100859)     |
| chr19 | 16228794  | 16230348  | HSH2D (-24934), RAB8A (+7132)       |
| chr3  | 99418862  | 99420000  | COL8A1 (+62112), FILIP1L (+413926)  |
| chr16 | 28198021  | 28199458  | GSG1L (-123910), XPO6 (+24450)      |
| chr5  | 130587621 | 130589312 | CDC42SE2 (-11326), LYRM7 (+81964)   |
| chr2  | 95740424  | 95740925  | MRPS5 (+47070), MAL (+49246)        |
| chr3  | 43235503  | 43236004  | SNRK (-92278), GTDC2 (-88186)       |
| chr3  | 141097344 | 141100252 | ZBTB38 (-7856), ACPL2 (+148128)     |

|       |           |           |                                          |
|-------|-----------|-----------|------------------------------------------|
| chr21 | 43609807  | 43610308  | ABCG1 (-29170), UMODL1 (+118632)         |
| chr1  | 117297509 | 117298703 | PTGFRN (-154573), CD2 (+1099)            |
| chr1  | 155435759 | 155436418 | ASH1L (+96234), RUSC1 (+145371)          |
| chr11 | 95449281  | 95449782  | SESN3 (-485171), FAM76B (+73423)         |
| chr2  | 8443744   | 8444428   | ID2 (-374889)                            |
| chr17 | 14330011  | 14333866  | HS3ST3B1 (+127539), PMP22 (+833967)      |
| chr4  | 2281953   | 2285001   | MXD4 (-19456), ZFYVE28 (+136913)         |
| chr1  | 89775030  | 89777658  | GBP6 (-53273), GBP5 (-37800)             |
| chr1  | 207094442 | 207098810 | FAIM3 (-1283)                            |
| chr7  | 151048965 | 151049466 | NUB1 (+10419), RHEB (+167794)            |
| chr19 | 17293056  | 17296174  | USE1 (-31553), MYO9B (+108024)           |
| chr9  | 134606680 | 134612970 | RAPGEF1 (-24596), MED27 (+345470)        |
| chr11 | 20052987  | 20054032  | DBX1 (+128360), NAV2 (+318367)           |
| chr2  | 69920694  | 69921195  | AAK1 (-50096), ANXA4 (-48161)            |
| chr5  | 35855454  | 35856090  | IL7R (-1179)                             |
| chr2  | 106712177 | 106713445 | C2orf40 (+30699), UXS1 (+97984)          |
| chrX  | 46446245  | 46448133  | CHST7 (+13970), SLC9A7 (+171301)         |
| chr19 | 1074182   | 1076311   | HMHA1 (+9325), POLR2E (+20351)           |
| chr19 | 10252799  | 10254166  | EIF3G (-22905), DNMT1 (+52272)           |
| chr9  | 136547947 | 136549830 | DBH (+47407), SARDH (+56153)             |
| chr17 | 66339766  | 66346288  | SLC16A6 (-55770), WIP1 (+110535)         |
| chr16 | 87989996  | 87990795  | CA5A (-20274), BANP (-13228)             |
| chr6  | 30474233  | 30480285  | PRR3 (-47404), HLA-E (+20015)            |
| chr12 | 68091191  | 68093726  | DYRK2 (+49958), IFNG (+461068)           |
| chr1  | 110343182 | 110347598 | CSF1 (-107865), EPS8L3 (-38741)          |
| chr5  | 66516633  | 66519870  | PIK3R1 (-993296), CD180 (-25625)         |
| chr14 | 61807069  | 61813075  | HIF1A (-354268), PRKCH (+21637)          |
| chr21 | 36392479  | 36403492  | RUNX1 (+23655), CLIC6 (+356298)          |
| chr12 | 672745    | 673246    | NINJ2 (+99949), B4GALNT3 (+103466)       |
| chr5  | 37197930  | 37198431  | C5orf42 (+51349), NIPBL (+321320)        |
| chr2  | 233939498 | 233941501 | ATG16L1 (-219717), INPP5D (+15311)       |
| chr14 | 22857423  | 22858383  | DAD1 (+200272), OR4E2 (+724606)          |
| chr1  | 117544673 | 117546146 | TTF2 (-57515), CD101 (+1028)             |
| chr16 | 18814731  | 18816483  | ENSG00000260342 (-2766), ARLGIP1 (-2607) |
| chr8  | 29833040  | 29833541  | DUSP4 (-625106), TMEM66 (+107432)        |
| chr19 | 8580670   | 8581171   | ZNF414 (-1877)                           |
| chr7  | 36756513  | 36767811  | AOAH (+1991), ANLN (+332747)             |
| chr8  | 66854100  | 66869984  | PDE7A (-107855), DNAJC5B (-71753)        |
| chr15 | 44970033  | 44970534  | PATL2 (-1198)                            |
| chr4  | 78774161  | 78776486  | CNOT6L (-34780), MRPL1 (-8350)           |
| chr2  | 175358245 | 175359565 | GPR155 (-7097), WIPF1 (+140402)          |
| chr6  | 143163127 | 143164593 | HIVEP2 (+102478), GPR126 (+540794)       |
| chr11 | 118212908 | 118213779 | CD3G (-1727), CD3D (+115)                |
| chr5  | 81608519  | 81609336  | ATP6AP1L (+33647), TMEM167A (+764387)    |
| chr19 | 30114823  | 30115324  | PLEKHF1 (-40889), POP4 (+20150)          |
| chr5  | 49888380  | 49889314  | EMB (-151646), PARP8 (-73925)            |
| chr10 | 3800069   | 3800951   | PITRM1 (-585507), KLF6 (+26957)          |
| chr10 | 127835654 | 127836343 | ADAM12 (+241025), FANK1 (+250891)        |
| chr13 | 40962006  | 40964968  | FOXO1 (+277247), COG6 (+733673)          |
| chr6  | 122204219 | 122204720 | HSF2 (-516221), GJA1 (+447632)           |
| chr2  | 238340101 | 238351843 | MLPH (-49839), COL6A3 (-22954)           |
| chr22 | 17717419  | 17719055  | CECR2 (-238390), CECR1 (-15358)          |
| chr18 | 74836671  | 74837172  | MBP (+7803), ZNF236 (+300806)            |
| chr17 | 4950396   | 4954089   | ZFP3 (-29300), SLC52A1 (-13516)          |
| chrX  | 153961606 | 153963263 | CTAG2 (-80582), GAB3 (+16917)            |
| chr7  | 142497341 | 142498047 | EPHB6 (-55098), PRSS1 (+40364)           |



|       |           |           |                                             |
|-------|-----------|-----------|---------------------------------------------|
| chr7  | 657257    | 659330    | PDGFA (-99263), PRKAR1B (+94550)            |
| chr12 | 104870155 | 104882292 | CHST11 (+25473), SLC41A2 (+446209)          |
| chr5  | 32531419  | 32532877  | ZFR (-87281), SUB1 (-53457)                 |
| chr6  | 45891145  | 45891792  | SUPT3H (-545799), CLIC5 (+156663)           |
| chr8  | 8195478   | 8197159   | ENSG00000182319 (+47689), ZNF705B (+395175) |
| chr12 | 29256146  | 29257337  | FAR2 (-119856), CCDC91 (+913363)            |
| chr8  | 126957485 | 126966056 | TRIB1 (+519208), FAM84B (+608867)           |
| chr3  | 33014976  | 33015796  | CCR4 (+22320), TMPPE (+122907)              |
| chr5  | 141395822 | 141396323 | GNPDA1 (-3714)                              |
| chr2  | 96980458  | 96983837  | SNRNP200 (-10895), ITPRIPL1 (-9787)         |
| chr11 | 12218072  | 12218573  | MICALCL (-90124), MICAL2 (+86185)           |
| chrX  | 39713818  | 39715396  | BCOR (+242049)                              |
| chr1  | 175177758 | 175178259 | TNN (+141015), TNR (+534897)                |
| chr11 | 128194172 | 128194969 | ETS1 (+262866)                              |
| chr9  | 126084675 | 126085622 | STRBP (-54294), CRB2 (-33390)               |
| chr5  | 39173027  | 39220833  | RICTOR (-122420), FYB (+73829)              |
| chr6  | 111549510 | 111550011 | KIAA1919 (-30790), SLC16A10 (+140980)       |
| chr5  | 75973702  | 75974988  | F2RL2 (-55086), F2R (-37523)                |
| chr17 | 16170107  | 16172747  | PIGL (+50903), CENPV (+85386)               |
| chr5  | 54332974  | 54333602  | GZMA (-65188), GZMK (+13207)                |
| chr1  | 40844746  | 40847547  | ZFP69B (-69632), SMAP2 (+6778)              |
| chr12 | 68091990  | 68093152  | DYRK2 (+50070), IFNG (+460956)              |
| chr20 | 62265922  | 62267267  | GMEB2 (-15366), STMN3 (+18185)              |
| chr17 | 4388865   | 4390340   | SPNS2 (-12530), SPNS3 (+52620)              |
| chr2  | 235196873 | 235205951 | ARL4C (+204285), SPP2 (+242069)             |
| chr16 | 16126808  | 16127309  | ABCC1 (+83625), ABCC6 (+190262)             |
| chr15 | 22445614  | 22453931  | TUBGCP5 (-383622), OR4N4 (+67391)           |
| chr2  | 97009422  | 97010071  | ARID5A (-192739), NCAPH (+8222)             |
| chr11 | 48034201  | 48035374  | OR4B1 (-203556), PTPRJ (+32675)             |
| chr2  | 198170484 | 198173450 | PGAP1 (-380512), ANKRD44 (+3544)            |
| chr15 | 55559043  | 55560006  | RSL24D1 (-70260), RAB27A (+3067)            |
| chr2  | 143886083 | 143886584 | ARHGAP15 (-549)                             |
| chr2  | 231305297 | 231307076 | CAB39 (-271373), SP100 (+25206)             |
| chr21 | 32554551  | 32555052  | KRTAP19-8 (-144007), TIAM1 (+376488)        |
| chr11 | 45122473  | 45125265  | TP53I11 (-152158), PRDM11 (-45025)          |
| chr20 | 47332942  | 47333841  | SULF2 (-918062), PREX1 (+111028)            |
| chr3  | 128508122 | 128508623 | ACAD9 (-90081), RAB7A (+63408)              |
| chr7  | 102056151 | 102056652 | ORAI2 (-17594), PRKRIP1 (+52058)            |
| chr14 | 52313261  | 52314177  | GNG2 (-13413), FRMD6 (+195054)              |
| chr16 | 4555584   | 4556245   | NMRAL1 (-29608), CDIP1 (+9195)              |
| chr16 | 11404509  | 11405142  | RMI2 (-34462), PRM1 (-29619)                |
| chr6  | 130068175 | 130073415 | ARHGAP18 (-39425), TMEM244 (+111897)        |
| chr16 | 53489755  | 53492488  | RBL2 (+22790), AKTIP (+46041)               |
| chr5  | 176839590 | 176840091 | F12 (-3264)                                 |
| chr2  | 144281607 | 144284138 | ARHGAP15 (+395990), GTDC1 (+769187)         |
| chr15 | 38943467  | 38944498  | THBS1 (-929311), RASGRP1 (-86976)           |
| chr22 | 27054632  | 27055133  | CRYBA4 (+36955)                             |
| chr12 | 47600678  | 47601179  | AMIGO2 (-127281), RPAP3 (+498915)           |
| chr5  | 39208697  | 39209198  | RICTOR (-134438), FYB (+61811)              |
| chr11 | 48039222  | 48039723  | OR4B1 (-198871), PTPRJ (+37360)             |
| chr6  | 35276633  | 35282969  | PPARD (-30590), DEF6 (+14172)               |
| chr17 | 75336707  | 75339513  | TNRC6C (-663027), SEPT9 (+60618)            |
| chr17 | 55676877  | 55677638  | ENSG00000166329 (+145415), MSI2 (+343363)   |
| chr1  | 101575652 | 101578984 | S1PR1 (-125126), DPH5 (-85990)              |
| chr1  | 90076103  | 90076604  | LRR8C (-22277), LRR8B (+85892)              |
| chr3  | 46007553  | 46008269  | CXCR6 (+21400), FYCO1 (+29396)              |

|       |           |           |                                     |
|-------|-----------|-----------|-------------------------------------|
| chr17 | 8845326   | 8845827   | PIK3R6 (-74583), PIK3R5 (+23447)    |
| chr14 | 90184634  | 90192312  | FOXN3 (-102999), EFCAB11 (+232560)  |
| chr12 | 89820641  | 89822471  | DUSP6 (-74508), GALNT4 (+97027)     |
| chr12 | 92792911  | 92793412  | BTG1 (-253489), CLLU1 (-24573)      |
| chr21 | 47978970  | 47979848  | S100B (+45712), DIP2A (+100385)     |
| chr22 | 40685578  | 40686242  | ADSL (-56597), TNRC6B (+111981)     |
| chr14 | 98647084  | 98659551  | NONE                                |
| chr2  | 216922170 | 216922892 | MREG (-44185), PECR (+24008)        |
| chr12 | 75872419  | 75876764  | GLIPR1 (+132)                       |
| chr3  | 16332275  | 16332938  | OXNAD1 (+25901), RFTN1 (+222606)    |
| chrX  | 1653183   | 1657697   | P2RY8 (+560)                        |
| chr6  | 149475435 | 149475936 | TAB2 (-166502), UST (+407222)       |
| chr1  | 117307482 | 117307983 | PTGFRN (-144946), CD2 (+10726)      |
| chr22 | 24548939  | 24550337  | SUSD2 (-27589), CABIN1 (+141770)    |
| chr2  | 42332412  | 42334799  | EML4 (-62884), PKDCC (+58446)       |
| chr3  | 50611254  | 50612498  | HEMK1 (+5248), CISH (+37327)        |
| chr10 | 6388162   | 6393184   | PFKFB3 (+145779), PRKCQ (+231590)   |
| chr7  | 8164568   | 8165578   | ICA1 (+136838), GLCCI1 (+156648)    |
| chr20 | 9221385   | 9221886   | PLCB4 (-66811)                      |
| chr19 | 36443163  | 36446756  | SDHAF1 (-41130), LRFN3 (+18508)     |
| chr14 | 66311903  | 66318377  | GPHN (-658985), FUT8 (+437830)      |
| chr9  | 129229031 | 129238583 | LMX1B (-142915), MVB12B (+144679)   |
| chr1  | 10569945  | 10572539  | PEX14 (+36298), CASZ1 (+285463)     |
| chr1  | 59184027  | 59185536  | MYSM1 (-19018), JUN (+65003)        |
| chr6  | 154570378 | 154571017 | IPCEF1 (+80517), OPRM1 (+239062)    |
| chr16 | 28994606  | 29001991  | LAT (+2152), NPIPB11 (+417051)      |
| chr6  | 4732792   | 4735719   | ECI2 (-598425), CDYL (-42413)       |
| chr6  | 47044236  | 47044737  | GPR110 (-34388), TNFRSF21 (+233154) |
| chr8  | 29847294  | 29849464  | DUSP4 (-640194), TMEM66 (+92344)    |
| chr1  | 90187177  | 90187814  | LRR8D (-99095), LRR8C (+88865)      |
| chr1  | 239882577 | 239883078 | FMN2 (-372352), CHR3 (+90455)       |
| chr2  | 216616377 | 216616878 | FN1 (-315733), MREG (+261718)       |
| chrX  | 13069405  | 13069906  | FAM9C (-6935), ATXN3L (+268862)     |
| chr2  | 97260776  | 97261277  | KANSL3 (+43019), ARID5A (+58541)    |
| chr1  | 22345111  | 22346587  | CDC42 (-33312), CELA3A (+17700)     |
| chr6  | 46292669  | 46294259  | ENPP5 (-154756), RCAN2 (+165635)    |
| chr9  | 92023754  | 92024453  | SEMA4D (+9644), SECISBP2 (+90683)   |
| chr19 | 15625494  | 15626398  | CYP4F3 (-125763), CYP4F22 (+6642)   |
| chr5  | 49890167  | 49890668  | EMB (-153217), PARP8 (-72354)       |
| chr1  | 117057506 | 117058627 | CD58 (+55594), ATP1A1 (+141578)     |
| chr17 | 66179057  | 66179558  | AMZ2 (-64407), KPNA2 (+147232)      |
| chr1  | 54231054  | 54233929  | GLIS1 (-32615), NDC1 (+72041)       |
| chr13 | 30944080  | 30954087  | KATNAL1 (-67463), HMGB1 (+242650)   |
| chr2  | 175703978 | 175713270 | CHRNA1 (-79435), CHN1 (+161330)     |
| chr14 | 23018339  | 23020276  | DAD1 (+38867), OR4E2 (+886011)      |
| chr11 | 117856418 | 117860816 | TMPRSS4 (-89187), IL10RA (+1554)    |
| chr12 | 9825849   | 9827137   | CLEC2D (+4184), CLECL1 (+59402)     |
| chr12 | 9516561   | 9517202   | PZP (-155916), KLRB1 (+243600)      |
| chr14 | 99397497  | 99399088  | BCL11B (+339272)                    |
| chr1  | 9710618   | 9716680   | PIK3CD (+1846), CLSTN1 (+170935)    |
| chr3  | 98282799  | 98283451  | CPOX (+29442), GPR15 (+32382)       |
| chr2  | 198160690 | 198161529 | PGAP1 (-369655), ANKRD44 (+14401)   |
| chr9  | 116279360 | 116280893 | ZNF618 (-358435), RGS3 (+73116)     |
| chr9  | 31346877  | 31347882  | NONE                                |
| chr16 | 3625185   | 3631587   | SLX4 (+33213), CLUAP1 (+77462)      |
| chr20 | 35274138  | 35274639  | SLA2 (+230)                         |

|       |           |           |                                     |
|-------|-----------|-----------|-------------------------------------|
| chr16 | 87533217  | 87533718  | JPH3 (-103043), ZCCHC14 (-7817)     |
| chr1  | 167595787 | 167607716 | MPZL1 (-89435), RCSD1 (+2422)       |
| chr11 | 132228092 | 132228593 | NTM (+446987), OPCML (+585223)      |
| chr8  | 23890611  | 23891112  | ADAM28 (-260691), STC1 (-178542)    |
| chr4  | 40206394  | 40206895  | CHRNA9 (-130701), RHOH (+8118)      |
| chr7  | 18547862  | 18549397  | HDAC9 (+12704), TWIST1 (+608665)    |
| chr8  | 126933006 | 126948771 | TRIB1 (+498326), FAM84B (+629749)   |
| chr14 | 23032417  | 23034145  | DAD1 (+24894), OR4E2 (+899984)      |
| chr20 | 50017142  | 50017643  | KCNG1 (-377727), NFATC2 (+141865)   |
| chr7  | 8173828   | 8174329   | ICA1 (+127832), GLCCI1 (+165654)    |
| chr1  | 185408248 | 185409260 | HMCN1 (-294929), IVNS1ABP (-122293) |
| chr6  | 143223440 | 143224690 | HIVEP2 (+42273), GPR126 (+600999)   |
| chr14 | 53573890  | 53577548  | FERMT2 (-157904), DDHD1 (+44097)    |
| chr12 | 92424055  | 92427545  | DCN (-848900), BTG1 (+113873)       |
| chr2  | 197041716 | 197042217 | STK17B (-5668), HECW2 (+415368)     |
| chr19 | 15571919  | 15579302  | RASAL3 (-234)                       |
| chr6  | 122078191 | 122078895 | HSF2 (-642148), GJA1 (+321705)      |
| chr1  | 89663546  | 89665118  | GBP4 (+283)                         |
| chr17 | 29647131  | 29647632  | EVI2B (-6252), EVI2A (+1385)        |
| chr12 | 110516863 | 110518176 | IFT81 (-44662), C12orf76 (-12020)   |
| chr3  | 52286885  | 52288492  | PPM1M (+7464), WDR82 (+24970)       |
| chr17 | 33546183  | 33547257  | SLC35G3 (-25308), SLFN5 (-23335)    |
| chr7  | 17273361  | 17275296  | AGR3 (-352718), AHR (-63917)        |
| chr5  | 171672554 | 171673055 | UBTD2 (+38270), EFCAB9 (+51629)     |
| chr8  | 136225004 | 136226187 | ZFAT (-500315), KHDRBS3 (-244104)   |
| chr20 | 31119677  | 31132027  | ASXL1 (+179697), COMMD7 (+205951)   |
| chr4  | 90220340  | 90220982  | TIGD2 (+186693), SNCA (+537629)     |
| chr2  | 198063319 | 198065309 | PGAP1 (-272859), ANKRD44 (+111197)  |
| chr10 | 63926624  | 63927125  | RTKN2 (+101591), ARID5B (+265816)   |
| chrX  | 128914558 | 128915059 | SASH3 (+849)                        |
| chr12 | 58931362  | 58932261  | LRIG3 (+382491), XRCC6BP1 (+596452) |
| chr10 | 4011199   | 4016909   | AKR1E2 (-854392), KLF6 (-186587)    |
| chrX  | 135862596 | 135864454 | ARHGEF6 (+722)                      |
| chr6  | 136200282 | 136203366 | PDE7B (+28990), MTFR2 (+369625)     |
| chr17 | 49106289  | 49108084  | TOB1 (-163481), SPAG9 (+91039)      |
| chr1  | 111190143 | 111190644 | KCNA2 (-40343), KCNA3 (+27261)      |
| chr2  | 98329073  | 98330911  | ZAP70 (-31)                         |
| chr1  | 12127902  | 12128403  | TNFRSF1B (-98907), TNFRSF8 (+4719)  |
| chr5  | 176784152 | 176785840 | RGS14 (+158)                        |
| chr7  | 39628655  | 39633451  | RALA (-32029), POU6F2 (+613455)     |
| chr4  | 57621696  | 57625737  | HOPX (-75845), SPINK2 (+64191)      |
| chr10 | 32701970  | 32702471  | EPC1 (-66108), ITGB1 (+544601)      |
| chr7  | 106356176 | 106361973 | NAMPT (-433437), PIK3CG (-146849)   |
| chr14 | 91707512  | 91712142  | GPR68 (+10442), C14orf159 (+129113) |
| chr3  | 46148996  | 46149692  | XCR1 (-80110), CCR1 (+100543)       |
| chr2  | 8612552   | 8613053   | ID2 (-206172)                       |
| chr1  | 33264004  | 33264505  | SYNC (-95535), S100BPB (-18901)     |
| chr11 | 118214800 | 118215472 | CD3D (-1677), CD3G (+65)            |
| chr20 | 37498457  | 37506686  | FAM83D (-52383), PPP1R16B (+68224)  |
| chr7  | 7196804   | 7197964   | CCZ1B (-330983), C1GALT1 (-24862)   |
| chr6  | 169487100 | 169488224 | THBS2 (+166477), SMOC2 (+645831)    |
| chr19 | 35488418  | 35489060  | GRAMD1A (-2452)                     |
| chr6  | 144669912 | 144673492 | UTRN (+58737)                       |
| chr1  | 108370910 | 108371411 | VAV3 (+136605), NTNG1 (+687719)     |
| chr3  | 54906997  | 54917670  | LRTM1 (+49767), CACNA2D3 (+755641)  |
| chr12 | 111043064 | 111044277 | PPTC7 (-22546), TCTN1 (-8298)       |

|       |           |           |                                             |
|-------|-----------|-----------|---------------------------------------------|
| chr6  | 153489298 | 153489953 | RGS17 (-124448), ENSG00000213121 (-62829)   |
| chr7  | 106504881 | 106505570 | PIK3CG (-698)                               |
| chr1  | 109188834 | 109190433 | HENMT1 (+14514), NBPFF6 (+271213)           |
| chr3  | 186626121 | 186628069 | ST6GAL1 (-21179), ADIPOQ (+66632)           |
| chr1  | 54121594  | 54122909  | GLIS1 (+77625), DMRTB1 (+197180)            |
| chr9  | 132032436 | 132034561 | NTMT1 (-337664), PPP2R4 (+159902)           |
| chr5  | 130545599 | 130546100 | CDC42SE2 (-53943), LYRM7 (+39347)           |
| chr16 | 68031287  | 68036341  | DPEP2 (+675)                                |
| chr7  | 37382052  | 37382803  | AOAH (-618275), ELMO1 (+106424)             |
| chrX  | 64916751  | 64919057  | MSN (+30367), VSIG4 (+342045)               |
| chr4  | 169614242 | 169615870 | PALLD (+196801), CBR4 (+316353)             |
| chr10 | 5631261   | 5632904   | CALML3 (+65159), ASB13 (+76458)             |
| chr20 | 35272366  | 35272867  | SLA2 (+2002), C20orf24 (+38392)             |
| chr14 | 100544724 | 100546062 | EVL (+13778), DEGS2 (+81107)                |
| chr10 | 121464307 | 121464808 | INPP5F (-21051), BAG3 (+53676)              |
| chrX  | 130946233 | 130948010 | ENSG00000134602 (-210171), OR13H1 (+269172) |
| chr11 | 60809176  | 60809990  | CD5 (-60284), CD6 (+70431)                  |
| chr3  | 51062857  | 51063492  | MANF (-359303), DOCK3 (+350503)             |
| chr2  | 132441922 | 132442423 | GPR39 (-731974), MZT2A (-192178)            |
| chr14 | 22538883  | 22539384  | OR4E2 (+405837), DAD1 (+519041)             |
| chrX  | 13141281  | 13142437  | FAM9C (-79138), ATXN3L (+196659)            |
| chr22 | 18260038  | 18260817  | BID (-3646)                                 |
| chr2  | 158756283 | 158756976 | PKP4 (-556994), UPP2 (+23416)               |
| chr3  | 27399072  | 27402772  | NEK10 (+9990), LRRC3B (+736625)             |
| chr2  | 196396671 | 196399347 | SLC39A10 (-123462)                          |
| chr8  | 33410742  | 33413599  | RNF122 (+12472), MAK16 (+69903)             |
| chr13 | 41930948  | 41931449  | RGCC (-100496), NAA16 (+45858)              |
| chr20 | 1649320   | 1658244   | SIRPA (-222160), SIRPG (-15357)             |
| chr19 | 54899661  | 54900576  | TTYH1 (-26581), LAIR1 (-23555)              |
| chr1  | 26613296  | 26617940  | CD52 (-28830), SH3BGRL3 (+9951)             |
| chr10 | 27025729  | 27029300  | PDSS1 (+40927), ABI1 (+122349)              |
| chr1  | 172665293 | 172675386 | FASLG (+42182), TNFSF18 (+349763)           |
| chr14 | 20943701  | 20947258  | RNASE10 (-33132), PNP (+7942)               |
| chr1  | 111186002 | 111186503 | KCNA2 (-36202), KCNA3 (+31402)              |
| chr6  | 31548443  | 31550815  | LTB (+573)                                  |
| chr8  | 126962632 | 126963133 | TRIB1 (+520320), FAM84B (+607755)           |
| chr6  | 159141943 | 159142444 | SYTL3 (+59843), EZR (+98250)                |
| chr2  | 160853712 | 160854764 | LY75-CD302 (-93017), PLA2R1 (+64883)        |
| chr3  | 188848425 | 188851836 | TPRG1 (-39632), LPP (+919410)               |
| chr11 | 85827610  | 85828245  | EED (-127658), PICALM (-47957)              |
| chr1  | 160598771 | 160599721 | CD84 (-49952), SLAMF1 (+17839)              |
| chr11 | 116719957 | 116727988 | APOA1 (-15307), SIK3 (+245020)              |
| chr20 | 46417632  | 46418133  | SULF2 (-2553)                               |
| chr2  | 175708206 | 175709273 | CHRNA1 (-79551), CHN1 (+161214)             |
| chr1  | 159037143 | 159037644 | AIM2 (+9297), IFI16 (+57712)                |
| chr7  | 105489719 | 105490220 | EFCAB10 (-268027), CDHR3 (-113715)          |
| chr2  | 10470778  | 10471789  | HPCAL1 (+27458), ODC1 (+117346)             |
| chr17 | 46519420  | 46519921  | SKAP1 (-12119), HOXB1 (+88688)              |
| chr19 | 40445123  | 40451514  | PSMC4 (-28593), FCGBP (-7786)               |
| chr2  | 197132863 | 197133364 | STK17B (-96815), HECW2 (+324221)            |
| chr5  | 169689249 | 169689987 | LCP2 (+35613), FOXI1 (+156717)              |
| chrX  | 153232894 | 153233395 | TMEM187 (-4633), HCFC1 (+4113)              |
| chr5  | 109193791 | 109194292 | MAN2A1 (+168975), TMEM232 (+868324)         |
| chr18 | 72706877  | 72707891  | ZADH2 (+213919), ZNF407 (+364408)           |
| chr6  | 106562519 | 106563269 | PRDM1 (+28699), ATG5 (+210772)              |
| chr11 | 118746640 | 118747508 | DDX6 (-85229), CXCR5 (-7401)                |

|       |           |           |                                             |
|-------|-----------|-----------|---------------------------------------------|
| chr17 | 35447119  | 35447774  | C17orf78 (-285538), AATF (+141272)          |
| chr5  | 169720515 | 169721016 | LCP2 (+4465), FOXI1 (+187865)               |
| chr12 | 782405    | 783276    | WNK1 (-79248), NINJ2 (-9896)                |
| chr1  | 89751333  | 89753516  | GBP6 (-77192), GBP5 (-13881)                |
| chr16 | 30479855  | 30489404  | ITGAL (+651)                                |
| chr16 | 89181874  | 89182573  | CDH15 (-55951), ACSF3 (+22007)              |
| chr2  | 68996618  | 68999428  | ARHGAP25 (+36056), BMP10 (+100626)          |
| chr13 | 99947982  | 99948483  | GPR18 (-34235), GPR183 (+11426)             |
| chr2  | 197065316 | 197065996 | STK17B (-29357), HECW2 (+391679)            |
| chr12 | 9178255   | 9178756   | KLRG1 (+36369), A2M (+90247)                |
| chr10 | 8286618   | 8287119   | GATA3 (+190213)                             |
| chr7  | 150364920 | 150365421 | GIMAP6 (-35698), GIMAP2 (-17617)            |
| chr1  | 151129391 | 151129892 | TNFAIP8L2 (+537)                            |
| chr1  | 214600997 | 214602001 | PTPN14 (+123067), SMYD2 (+146923)           |
| chr12 | 47753871  | 47755739  | AMIGO2 (-281157), RPAP3 (+345039)           |
| chr9  | 92079067  | 92079568  | GADD45G (-140610), SEMA4D (-45570)          |
| chr14 | 53208818  | 53210023  | STYX (+12521), GNPAT1 (+48898)              |
| chr7  | 962161    | 964712    | ADAP1 (+30896), GET4 (+47248)               |
| chr3  | 151914839 | 151919384 | MBNL1 (-68717), SUCNR1 (+325681)            |
| chr1  | 84607835  | 84613376  | PRKACB (+652)                               |
| chr9  | 101814091 | 101824288 | TGFBR1 (-48181), COL15A1 (+113269)          |
| chr14 | 35133986  | 35136967  | SNX6 (-36088), CFL2 (+47557)                |
| chr7  | 43697330  | 43700542  | BLVRA (-99350), COA1 (-9041)                |
| chr9  | 15299248  | 15300624  | FREM1 (-388943), SNAPC3 (-122766)           |
| chr10 | 64000422  | 64004302  | RTKN2 (+26104), ARID5B (+341303)            |
| chr10 | 30818019  | 30818937  | MAP3K8 (+95612), LYZL2 (+100213)            |
| chr15 | 77471615  | 77472374  | TSPAN3 (-108425), ENSG00000173517 (+240491) |
| chr2  | 197124997 | 197125498 | STK17B (-88949), HECW2 (+332087)            |
| chr9  | 95725589  | 95728335  | SUSD3 (-94027), FGD3 (+17229)               |
| chr12 | 89821846  | 89822347  | DUSP6 (-75049), GALNT4 (+96486)             |
| chr7  | 17678693  | 17679702  | SNX13 (+300919), AHR (+340952)              |
| chr6  | 137108592 | 137110431 | MAP7 (-261902), MAP3K5 (+4144)              |
| chr22 | 23161761  | 23163389  | IGLL5 (-67385), GGTL2 (+173759)             |
| chr1  | 172628278 | 172628911 | FASLG (+437)                                |
| chr8  | 19576183  | 19577614  | CSGALNACT1 (-116893), INTS10 (-97752)       |
| chr8  | 125283267 | 125284412 | TMEM65 (+101093), FER1L6 (+419613)          |
| chr10 | 134194534 | 134196231 | INPP5A (-155941), STK32C (-73939)           |
| chr2  | 37849120  | 37855542  | CDC42EP3 (+47003), QPCT (+280614)           |
| chr14 | 23022330  | 23031622  | DAD1 (+31199), OR4E2 (+893679)              |
| chr17 | 72462013  | 72464158  | CD300A (+531)                               |
| chr2  | 182168705 | 182179811 | ITGA4 (-147694), UBE2E3 (+328925)           |
| chr10 | 6516191   | 6516692   | PRKCQ (+105821), PFKFB3 (+271548)           |
| chr1  | 159059545 | 159062808 | CADM3 (-80222), AIM2 (-14486)               |
| chr10 | 81079772  | 81085129  | PPIF (-24783), ZMIZ1 (+253659)              |
| chr11 | 85848868  | 85856844  | EED (-102730), PICALM (-72885)              |
| chr11 | 67176836  | 67177464  | CARNS1 (-6407), TBC1D10C (+5738)            |
| chr10 | 33404734  | 33407827  | ITGB1 (-159459), NRP1 (+218909)             |
| chr9  | 130788582 | 130789831 | DPM2 (-88444), NAIF1 (+40393)               |
| chr17 | 30828436  | 30834291  | CDK5R1 (+17727), MYO1D (+372831)            |
| chr2  | 197074734 | 197077541 | STK17B (-39839), HECW2 (+381197)            |
| chr1  | 159792146 | 159800666 | SLAMF8 (-134)                               |
| chr11 | 128478903 | 128484080 | FLI1 (-82398), ETS1 (-24055)                |
| chr8  | 130982633 | 130987614 | FAM49B (-33046), ASAP1 (+429093)            |
| chr19 | 49838153  | 49839389  | CD37 (+114)                                 |
| chr12 | 90256364  | 90258575  | ATP2B1 (-154862)                            |
| chr6  | 139861298 | 139862041 | CITED2 (-165913)                            |

|       |           |           |                                           |
|-------|-----------|-----------|-------------------------------------------|
| chr12 | 9140405   | 9140906   | KLRG1 (-1481)                             |
| chr14 | 55799187  | 55799962  | DLGAP5 (-141179), ATG14 (+79001)          |
| chr6  | 25053538  | 25055164  | LRRRC16A (-225305), FAM65B (-143156)      |
| chr1  | 185536527 | 185537159 | IVNS1ABP (-250382), HMCN1 (-166840)       |
| chr11 | 1871855   | 1875813   | LSP1 (-12561), TNNI2 (+13123)             |
| chr6  | 159224801 | 159225910 | EZR (+15088), SYTL3 (+143005)             |
| chr11 | 6423458   | 6423959   | SMPD1 (+12048), APBB1 (+16591)            |
| chr20 | 3400077   | 3402027   | SLC4A11 (-182240), ATRN (-50635)          |
| chr3  | 32465726  | 32466227  | CMTM7 (+32814), CMTM6 (+78923)            |
| chr7  | 150260044 | 150268124 | GIMAP4 (-281)                             |
| chr10 | 62578624  | 62579125  | CDK1 (+40663), RHOBTB1 (+125130)          |
| chr20 | 56545343  | 56545997  | PMEP A1 (-260712), PPP4R1L (+338825)      |
| chr10 | 7519616   | 7528686   | SFMBT2 (-72848), ITIH5 (+184783)          |
| chr12 | 118797200 | 118797701 | TAOK3 (+13299), PEBP1 (+223788)           |
| chr13 | 30510104  | 30510605  | UBL3 (-85534), KATNAL1 (+371266)          |
| chr5  | 127149206 | 127150564 | SLC12A2 (-269573), CTXN3 (+165149)        |
| chr18 | 10073558  | 10074059  | APCDD1 (-380816), VAPA (+159750)          |
| chr20 | 25304360  | 25304861  | ABHD12 (+67008), PYGB (+75906)            |
| chr3  | 132286988 | 132287489 | ACKR4 (-28842), DNAJC13 (+150869)         |
| chr2  | 68992856  | 68995722  | ARHGAP25 (+32322), BMP10 (+104360)        |
| chr15 | 58764786  | 58765977  | LIPC (+62614), ADAM10 (+276795)           |
| chr3  | 32499080  | 32500432  | CMTM6 (+45144), CMTM7 (+66593)            |
| chr5  | 75842283  | 75844758  | F2RL2 (+75738), IQGAP2 (+144447)          |
| chr12 | 47609519  | 47610780  | AMIGO2 (-136502), RPAP3 (+489694)         |
| chr5  | 77881596  | 77883429  | LHFPL2 (+62135), SCAMP1 (+226174)         |
| chr20 | 35602837  | 35603338  | SAMHD1 (-22842), RBL1 (+121310)           |
| chr2  | 222382106 | 222383891 | EPHA4 (+54011)                            |
| chr1  | 12221308  | 12222877  | TNFRSF1B (-4967)                          |
| chr12 | 58135419  | 58136487  | AGAP2 (-3924), TSPAN31 (-2711)            |
| chr1  | 11025837  | 11026513  | CASZ1 (-169470), TARDBP (-46524)          |
| chr14 | 64226151  | 64226947  | SYNE2 (-93134), SGPP1 (-31792)            |
| chr9  | 79229732  | 79230588  | GCNT1 (+173578), PRUNE2 (+290843)         |
| chr1  | 26641483  | 26641984  | CD52 (-2714)                              |
| chr18 | 2588682   | 2590761   | SMCHD1 (-66015), NDC80 (+18212)           |
| chr10 | 44311877  | 44312378  | ZNF32 (-167976), CXCL12 (+568369)         |
| chr21 | 16047260  | 16050891  | SAMSN1 (-93353), NRIP1 (+388245)          |
| chr14 | 90146685  | 90149202  | FOXN3 (-62470), EFCAB11 (+273089)         |
| chr11 | 128603322 | 128604264 | FLI1 (+39903), KCNJ1 (+108636)            |
| chr12 | 122224520 | 122228880 | RHOF (+5468), TMEM120B (+75999)           |
| chr16 | 14603787  | 14605242  | PARN (+119609), MKL2 (+431370)            |
| chr7  | 30765749  | 30768446  | CRHR2 (-27379), INMT (-24653)             |
| chr9  | 75054554  | 75062095  | TMC1 (-78392), ZFAND5 (-78162)            |
| chr12 | 4003870   | 4008658   | CCND2 (-376674), PARP11 (-23724)          |
| chr6  | 170019191 | 170020736 | THBS2 (-365825), C6orf120 (-82293)        |
| chr13 | 76859400  | 76860223  | LMO7 (+525015), KCTD12 (+600713)          |
| chr7  | 42791698  | 42795097  | GLI3 (-516786), ENSG00000256646 (+178375) |
| chr1  | 161708004 | 161711605 | DUSP12 (-9755), FCRLB (+18452)            |
| chr20 | 11123646  | 11124687  | JAG1 (-469473)                            |
| chr10 | 30794255  | 30795116  | MAP3K8 (+71820), LYZL2 (+124005)          |
| chr1  | 121257136 | 121262351 | FCGR1B (-323807)                          |
| chr1  | 172632226 | 172632727 | FASLG (+4319), TNFSF18 (+387626)          |
| chr15 | 39916126  | 39918203  | THBS1 (+43871), GPR176 (+295928)          |
| chr18 | 28778560  | 28779061  | DSG1 (-119241), DSC1 (-35992)             |
| chr13 | 24827786  | 24829054  | C1QTNF9 (-52884), SPATA13 (+274476)       |
| chr10 | 20912388  | 20913525  | NEBL (+273574), PLXDC2 (+807789)          |
| chr13 | 30947579  | 30948080  | KATNAL1 (-66209), HMGB1 (+243904)         |

|       |           |           |                                      |
|-------|-----------|-----------|--------------------------------------|
| chr22 | 39493276  | 39493903  | APOBEC3H (+310)                      |
| chr17 | 77969611  | 77972598  | CBX4 (-157877), TBC1D16 (+38542)     |
| chr1  | 185308119 | 185308620 | HMCN1 (-395313), IVNS1ABP (-21909)   |
| chr1  | 26644172  | 26646140  | UBXN11 (-302), CD52 (+708)           |
| chr3  | 16343425  | 16345331  | OXNAD1 (+37672), RFTN1 (+210835)     |
| chr1  | 198651065 | 198653162 | PTPRC (+43944)                       |
| chr14 | 91880955  | 91884180  | GPR68 (-162299), CCDC88C (+1553)     |
| chr17 | 37246090  | 37257067  | PLXDC1 (+56323), LASP1 (+225467)     |
| chr10 | 127930809 | 127932484 | ADAM12 (+145377), FANK1 (+346539)    |
| chr13 | 37798968  | 37800737  | CSNK1A1L (-120050), POSTN (+373128)  |
| chr15 | 41036099  | 41037070  | RMDN3 (+11464), RAD51 (+49213)       |
| chr1  | 111415204 | 111415880 | CD53 (-234)                          |
| chr2  | 85071941  | 85074628  | TRABD2A (+35084), DNAH6 (+329706)    |
| chr11 | 118186180 | 118187431 | CD3E (+11546), CD3D (+26653)         |
| chr9  | 117689447 | 117693995 | TNFSF8 (+976)                        |
| chr2  | 68967175  | 68967841  | ARHGAP25 (+5541), BMP10 (+131141)    |
| chrX  | 9307448   | 9311441   | FAM9B (-307277), TBL1X (-123603)     |
| chr14 | 100533068 | 100536429 | EVL (+3134), DEGS2 (+91751)          |
| chr1  | 90182852  | 90192017  | LRR8D (-99156), LRR8C (+88804)       |
| chr9  | 18360171  | 18360672  | ADAMTSL1 (-113470), SH3GL2 (+781301) |
| chr22 | 37637005  | 37640360  | SSTR3 (-30321), RAC2 (+1627)         |
| chr7  | 150125550 | 150126222 | GIMAP8 (-21832), ZNF775 (+49462)     |
| chr2  | 37809545  | 37813942  | CDC42EP3 (+87590), QPCT (+240027)    |
| chr5  | 156535129 | 156535901 | HAVCR1 (-50028), HAVCR2 (+1210)      |
| chr2  | 70330605  | 70332141  | PCBP1 (+16788), TIA1 (+144400)       |
| chr2  | 64926131  | 64927874  | SLC1A4 (-289532), SERTAD2 (-45956)   |
| chr10 | 11187250  | 11187751  | CELF2 (+127608), USP6NL (+386773)    |
| chr20 | 35636634  | 35637135  | SAMHD1 (-56639), RBL1 (+87513)       |
| chr18 | 53536252  | 53537021  | TCF4 (-233452), TXNL1 (+769239)      |
| chr18 | 7204666   | 7205461   | PTPRM (-361716), LAMA1 (-87251)      |
| chr2  | 68968849  | 68969350  | ARHGAP25 (+7133), BMP10 (+129549)    |
| chr16 | 55149891  | 55151236  | IRX6 (-207108), IRX5 (+185790)       |
| chr2  | 121044735 | 121045476 | INHBB (-58613), RALB (+34772)        |
| chr10 | 70803731  | 70806455  | SRGN (-42781), KIAA1279 (+56606)     |
| chr1  | 22978459  | 22978960  | C1QB (-972)                          |
| chr3  | 46150305  | 46151294  | XCR1 (-81566), CCR1 (+99087)         |
| chr13 | 43564100  | 43569134  | DNAJC15 (-30722), TNFSF11 (+418328)  |
| chr22 | 17696571  | 17703054  | CECR5 (-59646), CECR1 (+3066)        |
| chr1  | 170173600 | 170174446 | GORAB (-327247), METTL11B (+58881)   |
| chr2  | 68592258  | 68592759  | PLEK (+204)                          |
| chr7  | 3129182   | 3136604   | SDK1 (-208187), CARD11 (-49314)      |
| chr3  | 46408905  | 46417720  | ACKR5 (-35736), CCR5 (+1680)         |
| chr1  | 9486581   | 9487482   | SLC25A33 (-112509), SPSB1 (+134093)  |
| chr3  | 195910246 | 195910747 | TFRC (-101437), ZDHHC19 (+27769)     |
| chr19 | 9967241   | 9970172   | PIN1 (+22708), OLFM2 (+78521)        |
| chr3  | 152936518 | 152942323 | ARHGEF26 (-899371), RAP2B (+59392)   |
| chrX  | 1655321   | 1656376   | P2RY8 (+151)                         |
| chr2  | 162022207 | 162023500 | PSMD14 (-141695), TANK (+6046)       |
| chr21 | 36406263  | 36427151  | RUNX1 (+4934), CLIC6 (+375019)       |
| chr9  | 129230274 | 129237609 | LMX1B (-142780), MVB12B (+144814)    |
| chr3  | 151961600 | 151962236 | MBNL1 (-23911), SUCNR1 (+370487)     |
| chr11 | 117877390 | 117880215 | TMPPRS4 (-69001), IL10RA (+21740)    |
| chr2  | 30559575  | 30560569  | LCLAT1 (-110051), LBH (+105675)      |
| chr7  | 30388158  | 30388812  | ZNRF2 (+64562), NOD1 (+129911)       |
| chr1  | 228667152 | 228667653 | RNF187 (-7359), HIST3H2BB (+21595)   |
| chr8  | 136223642 | 136224412 | ZFAT (-498746), KHDRBS3 (-245673)    |

|       |           |           |                                     |
|-------|-----------|-----------|-------------------------------------|
| chr2  | 134988544 | 134994850 | MGAT5 (+113944), TMEM163 (+484873)  |
| chr19 | 6655110   | 6655611   | CD70 (-64198), TNFSF14 (+15238)     |
| chr11 | 12009598  | 12010245  | DKK3 (+20707), USP47 (+146952)      |
| chr15 | 42228997  | 42230052  | SPTBN5 (-43250), EHD4 (+35251)      |
| chr1  | 98852323  | 98855930  | DPYD (-467548), SNX7 (-273152)      |
| chr19 | 6576545   | 6577387   | CD70 (+14197), TNFSF9 (+45956)      |
| chr9  | 134143574 | 134147585 | PPAPDC3 (-19501), NUP214 (+144632)  |
| chr14 | 51278927  | 51280208  | SAV1 (-144519), NIN (+18271)        |
| chr22 | 40858473  | 40859587  | SGSM3 (+92415), MKL1 (+173659)      |
| chrX  | 128893356 | 128894515 | SASH3 (-20024), XPNPEP2 (+20938)    |
| chr13 | 101959056 | 101959557 | TMTC4 (-632258), NALCN (+109399)    |
| chr8  | 127510985 | 127514295 | FAM84B (+57998)                     |
| chr1  | 160510255 | 160511141 | SLAMF6 (-17655), CD84 (+38596)      |
| chr18 | 68003102  | 68004600  | SOCS6 (+47714), GTSR1 (+314129)     |
| chr9  | 67301304  | 67302155  | ANKRD20A1 (-625031)                 |
| chr15 | 33148551  | 33149679  | GREM1 (+138940), FMN1 (+210970)     |
| chr3  | 186759226 | 186760482 | RPL39L (+97457), ST6GAL1 (+111580)  |
| chr9  | 140021522 | 140022215 | DPP7 (-12699), GRIN1 (-12064)       |
| chr14 | 90188134  | 90188870  | FOXN3 (-103028), EFCAB11 (+232531)  |
| chr3  | 56813889  | 56826875  | CCDC66 (+229181), ARHGFE3 (+292954) |
| chr19 | 8632495   | 8632996   | ZNF414 (-53702), MYO1F (+9715)      |
| chr5  | 121465246 | 121465747 | ZNF474 (+289)                       |
| chr7  | 50343764  | 50346681  | IKZF1 (-3095)                       |
| chr7  | 150361703 | 150362204 | GIMAP6 (-32481), GIMAP2 (-20834)    |
| chr13 | 50940042  | 50940543  | RNASEH2B (-543521), DLEU1 (+283986) |
| chr3  | 23803964  | 23805131  | UBE2E1 (-42846), UBE2E2 (+559764)   |
| chr8  | 59517338  | 59517839  | SDCBP (+51861), NSMAF (+54504)      |
| chr17 | 75662622  | 75663123  | TNRC6C (-338264), SEPT9 (+385381)   |
| chr6  | 25035373  | 25036171  | LRR16A (-243884), FAM65B (-124577)  |
| chr16 | 57643415  | 57643916  | GPR56 (-18753), GPR114 (+67065)     |
| chr2  | 28276111  | 28276612  | FOSL2 (-339363), RBKS (-162397)     |
| chr14 | 23035089  | 23035590  | DAD1 (+22835), OR4E2 (+902043)      |
| chr13 | 101480039 | 101480540 | TMTC4 (-153241), NALCN (+588416)    |
| chr1  | 200123645 | 200124290 | NR5A2 (+127238), ZNF281 (+255216)   |
| chr11 | 72864320  | 72865168  | P2RY2 (-64600), FCHSD2 (-11438)     |
| chr10 | 3783661   | 3784642   | PITRM1 (-569149), KLF6 (+43315)     |
| chr12 | 51723199  | 51723700  | BIN2 (-5502), CELA1 (+17013)        |
| chr2  | 216581650 | 216583895 | FN1 (-281878), MREG (+295573)       |
| chr2  | 189850814 | 189852096 | COL3A1 (+12409), COL5A2 (+193150)   |
| chr6  | 25041084  | 25042691  | LRR16A (-237768), FAM65B (-130693)  |
| chr12 | 121471310 | 121471811 | OASL (+5484), HNF1A (+55215)        |
| chr14 | 20944626  | 20946940  | RNASE10 (-32829), PNP (+8245)       |
| chr14 | 35134138  | 35136206  | SNX6 (-35783), CFL2 (+47862)        |
| chr3  | 31503169  | 31503930  | GADL1 (-567293), STT3B (-70732)     |
| chr6  | 167454517 | 167455018 | CCR6 (-81489), FGFR1OP (+42098)     |
| chr12 | 68871037  | 68878201  | MDM1 (-148507), RAP1B (-130000)     |
| chr11 | 129118757 | 129120358 | BARX2 (-126277), ARHGAP32 (-57465)  |
| chr12 | 51709879  | 51724361  | BIN2 (+828)                         |
| chr4  | 126188374 | 126189068 | FAT4 (-48833)                       |
| chr2  | 85060003  | 85061161  | TRABD2A (+47787), DNAH6 (+317003)   |
| chr20 | 19792941  | 19798150  | RIN2 (-71619), SLC24A3 (+602256)    |
| chr3  | 139024880 | 139030320 | COPB2 (+80974), MRPS22 (+302952)    |
| chr2  | 234176788 | 234177289 | SAG (-39428), ATG16L1 (+16822)      |
| chr1  | 145743980 | 145744481 | PDZK1 (+968)                        |
| chr1  | 233057937 | 233059362 | NTPCR (-27720), MAP10 (+118007)     |
| chr1  | 202132302 | 202132803 | PTPN7 (-1844)                       |



|       |           |           |                                       |
|-------|-----------|-----------|---------------------------------------|
| chr7  | 102066197 | 102067625 | ORAI2 (-7085), PRKRIP1 (+62567)       |
| chr19 | 19709998  | 19710499  | PBX4 (+19476), CILP2 (+61192)         |
| chr10 | 11218318  | 11218819  | CELF2 (+158676), USP6NL (+355705)     |
| chr8  | 61839281  | 61840828  | CLVS1 (-360459), CHD7 (+248718)       |
| chr21 | 36413341  | 36415795  | RUNX1 (+7073), CLIC6 (+372880)        |
| chr15 | 68172322  | 68172951  | PIAS1 (-173880), SKOR1 (+60595)       |
| chr9  | 130539505 | 130542005 | SH2D3C (+265)                         |
| chr9  | 444782    | 449138    | KANK1 (-23331), DOCK8 (+232095)       |
| chr9  | 86910074  | 86913355  | SLC28A3 (+43883), RMI1 (+316002)      |
| chr2  | 231508771 | 231509596 | CAB39 (-68376), SP100 (+228203)       |
| chr7  | 50298662  | 50311471  | IKZF1 (-43251), C7orf72 (+169435)     |
| chr2  | 64954026  | 64954527  | SLC1A4 (-262258), SERTAD2 (-73230)    |
| chr3  | 9322010   | 9322511   | THUMPDP3 (-82475), SRGAP3 (-31198)    |
| chr15 | 55543051  | 55543832  | RSL24D1 (-54177), RAB27A (+19150)     |
| chr17 | 34227655  | 34228156  | CCL5 (-20394), RDM1 (+29871)          |
| chr5  | 66511138  | 66513599  | PIK3R1 (-999179), CD180 (-19742)      |
| chr7  | 40508504  | 40510155  | C7orf10 (+334755)                     |
| chr7  | 138779778 | 138780811 | KIAA1549 (-114231), ZC3HAV1 (+14099)  |
| chr1  | 183561991 | 183562492 | NCF2 (-2526)                          |
| chr1  | 198589387 | 198590610 | ATP6V1G3 (-79924), PTPRC (-18171)     |
| chr13 | 38169996  | 38173317  | CSNK1A1L (-491854), POSTN (+1324)     |
| chr15 | 77280445  | 77281815  | PSTPIP1 (-6296), RCN2 (+57170)        |
| chr7  | 30386904  | 30387545  | ZNRF2 (+63302), NOD1 (+131171)        |
| chr7  | 90793834  | 90794881  | FZD1 (-99425), CDK14 (+455646)        |
| chr16 | 50717484  | 50720271  | SNX20 (-3615)                         |
| chr17 | 39462390  | 39467281  | KRTAP16-1 (+669)                      |
| chr2  | 175497432 | 175501865 | WIPF1 (-342)                          |
| chr1  | 40807069  | 40808358  | SMAP2 (-31655), COL9A2 (-24748)       |
| chr4  | 38336857  | 38337358  | KLF3 (-328709), PTTG2 (+375052)       |
| chr21 | 43480044  | 43485545  | ZBTB21 (-52329), UMODL1 (-8631)       |
| chr12 | 6897864   | 6902251   | GPR162 (-30653), CD4 (+1420)          |
| chr18 | 33737348  | 33738193  | MOCOS (-29711), ELP2 (+27910)         |
| chr5  | 146132172 | 146132673 | GPR151 (-236670), PPP2R2B (+303114)   |
| chr3  | 156207717 | 156208343 | SSR3 (+64943), KCNAB1 (+369693)       |
| chr7  | 13889228  | 13889896  | ETV1 (+140009)                        |
| chr18 | 45963614  | 45964115  | ZBTB7C (-271928), CTIF (-101664)      |
| chr15 | 22466075  | 22468518  | TUBGCP5 (-366098), OR4N4 (+84915)     |
| chr7  | 150357859 | 150369039 | GIMAP6 (-33976), GIMAP2 (-19339)      |
| chr4  | 40256449  | 40257076  | CHRNA9 (-80583), RHOH (+58236)        |
| chr6  | 122147164 | 122147810 | HSF2 (-573204), GJA1 (+390649)        |
| chr1  | 9711563   | 9714935   | PIK3CD (+1446), CLSTN1 (+171335)      |
| chr1  | 154310423 | 154310924 | IL6R (-66995), ATP8B2 (+10398)        |
| chr9  | 118377184 | 118379334 | PAPPA (-537824), DEC1 (+474162)       |
| chr3  | 177837921 | 177838422 | TBL1XR1 (-923906), KCNMB2 (-438316)   |
| chr5  | 81634815  | 81636753  | ATP6AP1L (+60503), TMEM167A (+737531) |
| chr6  | 31060551  | 31063270  | C6orf15 (+18425), MUC22 (+83660)      |
| chr9  | 117692567 | 117693446 | TNFSF8 (-310)                         |
| chr3  | 139029359 | 139029860 | COPB2 (+78964), MRPS22 (+304962)      |
| chr2  | 128171027 | 128171528 | PROC (-4725)                          |
| chr8  | 33411009  | 33413105  | RNF122 (+12586), MAK16 (+69789)       |
| chr1  | 111764498 | 111765595 | CHIA (-68491), CHI3L2 (+21654)        |
| chr15 | 58678616  | 58680103  | LIPC (-23408), AQP9 (+248965)         |
| chr5  | 39187560  | 39188061  | RICTOR (-113301), FYB (+82948)        |
| chr1  | 84156082  | 84156583  | TTLL7 (+308482)                       |
| chr10 | 70988185  | 70988866  | HK1 (-59974), HKDC1 (+8467)           |
| chr14 | 25141121  | 25145077  | GZMB (-39626), STXBP6 (+376404)       |

|       |           |           |                                      |
|-------|-----------|-----------|--------------------------------------|
| chr20 | 44688618  | 44690216  | NCOA5 (+29174), SLC12A5 (+39088)     |
| chrX  | 53741668  | 53742169  | HUWE1 (-30805), PHF8 (+329763)       |
| chr17 | 74140936  | 74142299  | FOXJ1 (-4238)                        |
| chr11 | 117886249 | 117887427 | TMPRSS4 (-60966), IL10RA (+29775)    |
| chr1  | 111416478 | 111418626 | CD53 (+1776), LRIF1 (+89149)         |
| chr14 | 64911486  | 64912784  | AKAP5 (-21690), MTHFD1 (+57376)      |
| chr10 | 33398140  | 33401898  | ITGB1 (-153197), NRP1 (+225171)      |
| chr11 | 94642642  | 94643949  | CWC15 (+63480), AMOTL1 (+141759)     |
| chrX  | 13099744  | 13100840  | FAM9C (-37571), ATXN3L (+238226)     |
| chr14 | 93569642  | 93570143  | ITPK1 (+12255), CHGA (+180468)       |
| chr15 | 38988139  | 38988640  | THBS1 (-884904), RASGRP1 (-131383)   |
| chr6  | 106603913 | 106606087 | PRDM1 (+70805), ATG5 (+168666)       |
| chr11 | 33033300  | 33033945  | DEPDC7 (-3787)                       |
| chr3  | 188631495 | 188636324 | TPRG1 (-255853), LPP (+703189)       |
| chr1  | 6054048   | 6054874   | NPHP4 (-1930)                        |
| chr18 | 60172981  | 60173482  | ZCCHC2 (-17008), TNFRSF11A (+180684) |
| chr8  | 27235644  | 27237360  | PTK2B (+67503), CHRNA2 (+100311)     |
| chr1  | 172307342 | 172316216 | PIGC (+101447), DNMT3 (+501158)      |
| chr8  | 126649332 | 126650145 | TRIB1 (+207176), FAM84B (+920899)    |
| chr7  | 50305726  | 50306227  | IKZF1 (-42341), C7orf72 (+170345)    |
| chr14 | 98169486  | 98169987  | VRK1 (+906096)                       |
| chr22 | 27044027  | 27044528  | CRYBA4 (+26350)                      |
| chr8  | 121741378 | 121748646 | SNTB1 (+80501), MTBP (+287346)       |
| chr13 | 42968598  | 42969452  | TNFSF11 (-179264), AKAP11 (+122736)  |
| chr2  | 158274258 | 158276120 | ERMN (-90964), CYTIP (+25465)        |
| chr11 | 117821473 | 117822828 | IL10RA (-34912), TMPRSS13 (-22071)   |
| chr2  | 106412885 | 106416614 | C2orf40 (-267362), NCK2 (+53396)     |
| chr3  | 33096006  | 33096820  | TMPPE (+41880), CCR4 (+103347)       |
| chr6  | 149461157 | 149461658 | TAB2 (-180780), UST (+392944)        |
| chr5  | 150593230 | 150595837 | ANXA6 (-57091), GM2A (-37919)        |
| chr14 | 67954483  | 67955783  | PLEK2 (-76216), TMEM229B (+26888)    |
| chr5  | 175956786 | 175957287 | RNF44 (+7384), FAF2 (+81681)         |
| chr1  | 206729868 | 206733340 | RASSF5 (+50725), EIF2D (+54300)      |
| chr5  | 135372133 | 135373344 | SMAD5 (-95797), TGFBI (+8155)        |
| chr22 | 47144601  | 47147165  | TBC1D22A (-12635), CERK (-11725)     |
| chr1  | 172148999 | 172152131 | PIGC (+262661), DNMT3 (+339944)      |
| chr5  | 148188024 | 148188525 | HTR4 (-154559), ADRB2 (-17881)       |
| chr13 | 37709894  | 37712375  | CSNK1A1L (-31332), POSTN (+461846)   |
| chr1  | 110344226 | 110346000 | CSF1 (-108142), EPS8L3 (-38464)      |
| chr7  | 94036043  | 94036544  | CASD1 (-102816), COL1A2 (+12421)     |
| chr7  | 80791030  | 80791531  | SEMA3C (-242614), HGF (+608233)      |
| chr7  | 55376087  | 55376588  | LANCL2 (-56803), EGFR (+289544)      |
| chr2  | 30487147  | 30490315  | LCLAT1 (-181392), LBH (+34334)       |
| chr12 | 14538001  | 14539614  | ATF7IP (+20192), PLBD1 (+182475)     |
| chr16 | 68108153  | 68108654  | DDX28 (-50634), NFATC3 (-11157)      |
| chr1  | 159043186 | 159048728 | AIM2 (+734)                          |
| chr7  | 150253513 | 150254014 | GIMAP4 (-10601), GIMAP7 (+41846)     |
| chr18 | 33732542  | 33733043  | MOCOS (-34689), ELP2 (+22932)        |
| chr9  | 134126704 | 134135828 | PPAPDC3 (-33815), NUP214 (+130318)   |
| chr11 | 46267045  | 46271623  | PHF21A (-126773), CREB3L1 (-29878)   |
| chr1  | 169680426 | 169680927 | SELL (+162)                          |
| chr2  | 113930767 | 113932978 | PSD4 (+325)                          |
| chr12 | 47298292  | 47299145  | PCED1B (-174667), SLC38A4 (-78939)   |
| chr2  | 152494028 | 152494529 | NEB (+96722), RIF1 (+227824)         |
| chr10 | 50352395  | 50354421  | VSTM4 (-29854), C10orf128 (+42996)   |
| chr4  | 156549148 | 156550458 | MAP9 (-251681), GUCY1A3 (-38547)     |

|       |           |           |                                     |
|-------|-----------|-----------|-------------------------------------|
| chr1  | 89827245  | 89831849  | GBP6 (-70)                          |
| chr8  | 124849199 | 124853884 | ANXA13 (-101900), FER1L6 (-12685)   |
| chr1  | 161151319 | 161157417 | B4GALT3 (-7093), ADAMTS4 (+14478)   |
| chr1  | 101578106 | 101578607 | S1PR1 (-124087), DPH5 (-87029)      |
| chr5  | 1789375   | 1795898   | LPCAT1 (-268545), MRPL36 (+7372)    |
| chr15 | 81162705  | 81163206  | KIAA1199 (+91244), MESDC2 (+119263) |
| chr6  | 16728355  | 16729836  | ATXN1 (+32591), GMPR (+490285)      |
| chr12 | 51712654  | 51713282  | SMAGP (-48294), BIN2 (+4980)        |
| chrX  | 13018146  | 13019217  | TMSB4X (+25453), FAM9C (+44039)     |
| chr2  | 225821841 | 225822958 | CUL3 (-372335), DOCK10 (+84759)     |
| chr13 | 43632047  | 43632898  | DNAJC15 (+35134), ENOX1 (+728571)   |
| chr1  | 221898815 | 221899873 | DUSP10 (+16174), HLX (+847645)      |
| chr2  | 71644627  | 71645128  | DYSF (-48954), ZNF638 (+85984)      |
| chr4  | 148281827 | 148284024 | EDNRA (-119158), POU4F2 (+722881)   |
| chr16 | 67589195  | 67590936  | CTCF (-6244), FAM65A (+26436)       |
| chrX  | 13103436  | 13105141  | FAM9C (-41568), ATXN3L (+234229)    |
| chr21 | 37012739  | 37013240  | RUNX1 (-591349), SETD4 (+419569)    |
| chr16 | 78776092  | 78776769  | WWOX (+643121), MAF (+858180)       |
| chr5  | 75955483  | 75956117  | F2R (-56068), F2RL2 (-36541)        |
| chr12 | 68023690  | 68025018  | DYRK2 (-18147), CAND1 (+361293)     |
| chr4  | 6690075   | 6692480   | S100P (-3518)                       |
| chr13 | 42967058  | 42967698  | TNFSF11 (-180911), AKAP11 (+121089) |
| chr2  | 28646671  | 28647172  | PLB1 (-72016), FOSL2 (+31197)       |
| chr14 | 65394992  | 65395493  | CHURC1-FNTB (+14032), GPX2 (+14288) |
| chr12 | 91708645  | 91713498  | DCN (-134172), BTG1 (+828601)       |
| chr12 | 89044152  | 89045417  | KITLG (-70547), DUSP6 (+702263)     |
| chr10 | 15249981  | 15251477  | NMT2 (-40037), FAM171A1 (+162329)   |
| chr6  | 32911964  | 32912835  | HLA-DMB (-3553)                     |
| chr21 | 46333520  | 46335348  | PTTG1IP (-40682), ITGB2 (+14354)    |
| chr9  | 21680366  | 21686718  | IFNE (-201230), MTAP (-119000)      |
| chr10 | 105230300 | 105232013 | CALHM1 (-12512), CALHM3 (+7840)     |
| chr6  | 149551358 | 149557622 | TAB2 (-87698), UST (+486026)        |
| chr13 | 51465575  | 51469805  | RNASEH2B (-16124), DLEU1 (+811383)  |
| chr14 | 102188629 | 102189263 | PPP2R5C (-39189), DIO3 (+161258)    |
| chr17 | 7239963   | 7240764   | ACAP1 (+516)                        |
| chr11 | 6766539   | 6768210   | MRPL17 (-62743), OR2AG2 (+22911)    |
| chr14 | 71466197  | 71467666  | SIPA1L1 (-529110), PCNX (+92810)    |
| chr1  | 112013028 | 112013529 | C1orf162 (-3135)                    |
| chr22 | 28538810  | 28540452  | PITPNB (-224375), TTC28 (+536222)   |
| chr2  | 189856049 | 189862899 | COL3A1 (+20428), COL5A2 (+185131)   |
| chr9  | 132631912 | 132632413 | USP20 (+34414), FNBP1 (+173278)     |
| chr9  | 139894562 | 139895219 | CLIC3 (-3636)                       |
| chr15 | 22449733  | 22450567  | TUBGCP5 (-383245), OR4N4 (+67768)   |
| chr7  | 121184197 | 121185645 | PTPRZ1 (-328222), FAM3C (-148533)   |
| chr12 | 73141130  | 73141910  | TRHDE (+475057)                     |
| chr20 | 38515064  | 38515691  | MAFB (+802502), DHX35 (+924400)     |
| chr8  | 61838170  | 61843650  | CLVS1 (-359604), CHD7 (+249573)     |
| chr2  | 175460517 | 175465032 | GPR155 (-110967), WIPF1 (+36532)    |
| chr7  | 50301934  | 50302857  | IKZF1 (-45922), C7orf72 (+166764)   |
| chr10 | 22934613  | 22936014  | PIP4K2A (+68170), SPAG6 (+300915)   |
| chr11 | 60793386  | 60794738  | CD5 (-75805), CD6 (+54910)          |
| chr11 | 65694474  | 65695907  | SART1 (-33969), DRAP1 (+8463)       |
| chr1  | 121260703 | 121261387 | FCGR1B (-325108)                    |
| chr1  | 9776922   | 9778368   | PIK3CD (+65842), CLSTN1 (+106939)   |
| chr1  | 225653958 | 225656167 | LBR (-38544), ENAH (+185781)        |
| chr14 | 76343075  | 76343576  | TGFB3 (+104208), TTLL5 (+215705)    |

|       |           |           |                                           |
|-------|-----------|-----------|-------------------------------------------|
| chr4  | 57622789  | 57625576  | HOPX (-76311), SPINK2 (+63725)            |
| chr15 | 75074110  | 75083469  | LMAN1L (-26267), CSK (+4392)              |
| chr8  | 125575256 | 125578424 | NDUFB9 (+25496), MTSS1 (+163830)          |
| chr19 | 36419209  | 36422953  | TYROBP (-21884), LRFN3 (-5371)            |
| chr13 | 96161938  | 96162589  | ABCC4 (-208581), CLDN10 (-42715)          |
| chr1  | 93446986  | 93447487  | MTF2 (-97558), FAM69A (-20180)            |
| chr1  | 90218669  | 90229664  | LRRRC8D (-62424), LRRRC8C (+125536)       |
| chr1  | 160548986 | 160549612 | CD84 (-5)                                 |
| chr2  | 231506997 | 231509833 | CAB39 (-69145), SP100 (+227434)           |
| chr9  | 131998492 | 131998993 | NTMT1 (-372420), PPP2R4 (+125146)         |
| chr10 | 11204046  | 11209160  | CELF2 (+146710), USP6NL (+367671)         |
| chr6  | 122158702 | 122160134 | HSF2 (-561273), GJA1 (+402580)            |
| chr2  | 189387725 | 189395323 | COL3A1 (-447522), GULP1 (+233965)         |
| chr5  | 156967355 | 156969338 | ADAM19 (+34436), NIPAL4 (+81320)          |
| chr21 | 43605998  | 43611152  | ABCG1 (-30653), UMODL1 (+117149)          |
| chr8  | 134083038 | 134084358 | WISP1 (-119584), SLA (-11095)             |
| chr3  | 184503096 | 184505521 | VPS8 (-25622), EPHB3 (+224737)            |
| chr21 | 36308859  | 36309360  | RUNX1 (+112531), CLIC6 (+267422)          |
| chr10 | 97620605  | 97621106  | CCNJ (-182484), ENTPD1 (+105447)          |
| chr5  | 171605036 | 171607740 | FBXW11 (-172744), STK10 (+9002)           |
| chr4  | 26290427  | 26291113  | RBPJ (-30562), SMIM20 (+374944)           |
| chr2  | 27908755  | 27909256  | MRPL33 (-85578), SUPT7L (-22330)          |
| chr12 | 68872627  | 68877033  | MDM1 (-148718), RAP1B (-129789)           |
| chr17 | 65436176  | 65438146  | NOL11 (-276788), PITPNC1 (+62890)         |
| chr17 | 29637698  | 29639301  | OMG (-14071), EVI2B (+2630)               |
| chr1  | 33445965  | 33447953  | RNF19B (-16673), AK2 (+55634)             |
| chr7  | 8213748   | 8219150   | ICA1 (+85462), GLCC1 (+208024)            |
| chr5  | 74537588  | 74538369  | GCNT4 (-211255), HMGCR (-95014)           |
| chr16 | 23092063  | 23095046  | USP31 (+67036), HS3ST2 (+268057)          |
| chr17 | 59386382  | 59387521  | TBX2 (-90305), BCAS3 (+631702)            |
| chr3  | 9222125   | 9222626   | RAD18 (-217190), SRGAP3 (+68687)          |
| chr3  | 187717924 | 187718679 | BCL6 (-254787), LPP (-212419)             |
| chr1  | 192519152 | 192520793 | RGS1 (-24884), RGS21 (+233851)            |
| chr1  | 181118982 | 181119608 | CACNA1E (-333586), MR1 (+116156)          |
| chr18 | 2634922   | 2638217   | SMCHD1 (-19167), NDC80 (+65060)           |
| chr17 | 47465969  | 47466470  | ZNF652 (-26385), PHB (+26022)             |
| chr7  | 139528078 | 139531666 | TBXAS1 (+920)                             |
| chr14 | 98638329  | 98639153  | NONE                                      |
| chr11 | 85849526  | 85850027  | EED (-105809), PICALM (-69806)            |
| chr1  | 43396614  | 43399694  | SLC2A1 (+26347), ZNF691 (+85847)          |
| chr11 | 122614420 | 122614921 | CRTAM (-94537), UBASH3B (+88288)          |
| chr12 | 102561196 | 102561697 | PMCH (+30176), PARPBP (+47424)            |
| chr17 | 27465302  | 27468994  | TIAF1 (-61273), MYO18A (+40282)           |
| chr11 | 94986664  | 94988917  | SESN3 (-23430), FAM76B (+535164)          |
| chr20 | 35224095  | 35224869  | C20orf24 (-9743), TGIF2-C20orf24 (+21526) |
| chr1  | 206939312 | 206940143 | IL10 (+6111), MAPKAPK2 (+81346)           |
| chr2  | 85171555  | 85174890  | KCMF1 (-24993), TMSB10 (+40474)           |
| chr14 | 52643158  | 52643659  | NID2 (-107697), PTGDR (-91022)            |
| chr1  | 112146664 | 112148018 | ADORA3 (-101231), RAP1A (-15064)          |
| chr5  | 130592567 | 130593418 | CDC42SE2 (-6800), LYRM7 (+86490)          |
| chr3  | 124826405 | 124826906 | HEG1 (-51854), SLC12A8 (+103587)          |
| chr2  | 8661200   | 8661701   | ID2 (-157524)                             |
| chr20 | 31123120  | 31124122  | ASXL1 (+177466), COMMD7 (+208182)         |
| chr8  | 21769139  | 21771197  | GFRA2 (-123846), DOK2 (+1203)             |
| chr1  | 172319475 | 172332300 | PIGC (+87338), DNM3 (+515267)             |
| chr10 | 78164095  | 78166401  | C10orf11 (+622729)                        |

|       |           |           |                                             |
|-------|-----------|-----------|---------------------------------------------|
| chr6  | 136200531 | 136202097 | PDE7B (+28480), MTRF2 (+370135)             |
| chr2  | 235197830 | 235201580 | ARL4C (+205992), SPP2 (+240362)             |
| chr11 | 10480678  | 10481435  | AMPD3 (+8829), MTRNR2L8 (+49666)            |
| chr8  | 130983733 | 130984234 | FAM49B (-31906), ASAP1 (+430233)            |
| chr7  | 94037658  | 94043796  | CASD1 (-98383), COL1A2 (+16854)             |
| chr6  | 159482939 | 159483440 | FNDC1 (-107239), TAGAP (-17006)             |
| chr3  | 99113261  | 99113762  | DCBLD2 (-492979), COL8A1 (-243807)          |
| chr7  | 134301766 | 134304269 | BPGM (-28565), AKR1B15 (+69130)             |
| chr13 | 42066319  | 42067313  | RGCC (+35121), VWA8 (+468404)               |
| chr17 | 4389040   | 4389685   | SPNS2 (-12770), SPNS3 (+52380)              |
| chr6  | 130069193 | 130072815 | ARHGAP18 (-39634), TMEM244 (+111688)        |
| chr8  | 121760349 | 121761164 | SNTB1 (+64756), MTBP (+303091)              |
| chr9  | 134054193 | 134055752 | PPAPDC3 (-110108), NUP214 (+54025)          |
| chr14 | 98190114  | 98192030  | VRK1 (+927431)                              |
| chr22 | 36828075  | 36829206  | MYH9 (-44578), TXN2 (+49436)                |
| chr22 | 47186568  | 47187662  | TBC1D22A (+28597)                           |
| chr16 | 81037482  | 81038387  | CENPN (-2884), CMC2 (+2784)                 |
| chr12 | 76337365  | 76339791  | KRR1 (-433177), PHLDA1 (+89134)             |
| chr14 | 21247851  | 21253061  | RNASE6 (+1246), RNASE1 (+20981)             |
| chr19 | 35953216  | 35953717  | FFAR2 (+14264), KRTDAP (+27966)             |
| chr20 | 31553030  | 31566543  | SUN5 (+32452), EFCAB8 (+113058)             |
| chr6  | 20320135  | 20320636  | MBOAT1 (-107756), E2F3 (-82012)             |
| chr17 | 47285279  | 47297903  | GNGT2 (-4829), ABI3 (+4002)                 |
| chr8  | 121868644 | 121870625 | SNTB1 (-44122), HAS2 (+783995)              |
| chr2  | 189869760 | 189870261 | COL3A1 (+30965), COL5A2 (+174594)           |
| chr2  | 8617392   | 8618737   | ID2 (-200910)                               |
| chr19 | 8258451   | 8259943   | FBN3 (-44467), CERS4 (-15040)               |
| chr5  | 153599282 | 153602859 | SAP30L (-224446), GALNT10 (+30781)          |
| chr1  | 172320726 | 172321502 | PIGC (+92112), DNM3 (+510493)               |
| chr9  | 92150440  | 92150941  | SEMA4D (-116943), GADD45G (-69237)          |
| chr15 | 77287142  | 77289634  | PSTPIP1 (+962)                              |
| chr8  | 16219187  | 16219688  | MSR1 (-169214), FGF20 (+640252)             |
| chr5  | 141002974 | 141003621 | DIAPH1 (-4676)                              |
| chr11 | 35352208  | 35352910  | SLC1A2 (+88237), CD44 (+191831)             |
| chr11 | 74986016  | 74988289  | TPBGL (+35203), ARRB1 (+75596)              |
| chr1  | 12148033  | 12148534  | TNFRSF1B (-78776), TNFRSF8 (+24850)         |
| chr3  | 69337524  | 69338025  | LMOD3 (-166058), FRMD4B (+97449)            |
| chr17 | 33539397  | 33542138  | SLFN5 (-29287), SLC35G3 (-19356)            |
| chr2  | 224463022 | 224463981 | SCG2 (+3719), KCNE4 (+546640)               |
| chr19 | 8631321   | 8644509   | ZNF414 (-58871), MYO1F (+4546)              |
| chr1  | 173300240 | 173300977 | PRDX6 (-145796), TNFSF4 (-124157)           |
| chr19 | 17294097  | 17295435  | USE1 (-31402), MYO9B (+108175)              |
| chr17 | 30893082  | 30898662  | CDK5R1 (+82235), MYO1D (+308323)            |
| chr3  | 13455892  | 13456735  | IQSEC1 (-447146), NUP210 (+5495)            |
| chr15 | 75069115  | 75070958  | CSK (-4361)                                 |
| chr22 | 39485950  | 39488099  | APOBEC3H (-6255), APOBEC3G (+14015)         |
| chr4  | 90237960  | 90238635  | TIGD2 (+204330), SNCA (+519992)             |
| chr17 | 16171101  | 16171779  | PIGL (+50916), CENPV (+85373)               |
| chr16 | 68033940  | 68034441  | DPEP2 (+298)                                |
| chr22 | 36801729  | 36802230  | MYH9 (-17917), TXN2 (+76097)                |
| chr7  | 24495595  | 24496096  | MPP6 (-117239), NPY (+172039)               |
| chr11 | 36432656  | 36433640  | PRR5L (+35593), TRAF6 (+98674)              |
| chr8  | 121609661 | 121611305 | MTBP (+152817), SNTB1 (+215030)             |
| chr1  | 167596776 | 167601750 | RCS1 (-67)                                  |
| chr16 | 85968427  | 85971417  | FOXF1 (-574211), IRF8 (+37513)              |
| chrX  | 130946836 | 130947337 | ENSG00000134602 (-210206), OR13H1 (+269137) |

|       |           |           |                                      |
|-------|-----------|-----------|--------------------------------------|
| chr17 | 29648831  | 29649482  | EVI2A (-390)                         |
| chr3  | 142886498 | 142892124 | CHST2 (+51138), SLC9A9 (+678062)     |
| chr21 | 36443951  | 36446436  | RUNX1 (-23553), SETD4 (+987365)      |
| chr5  | 156679838 | 156680339 | CYFIP2 (-13049), ITK (+72252)        |
| chr16 | 30193167  | 30199673  | SLX1A (-8818), CORO1A (+1677)        |
| chr19 | 55764793  | 55767341  | TMEM86B (-25435), PPP6R1 (+4296)     |
| chr7  | 135563684 | 135564185 | FAM180A (-130341), MTPN (+98129)     |
| chr5  | 124418956 | 124419457 | ZNF608 (-338089)                     |
| chrX  | 9308169   | 9311316   | FAM9B (-307575), TBL1X (-123305)     |
| chr5  | 138778909 | 138779700 | DNAJC18 (-4090)                      |
| chr2  | 234934191 | 234935513 | SPP2 (-24491), TRPM8 (+108809)       |
| chr2  | 61188374  | 61190731  | PEX13 (-55304), REL (+80897)         |
| chr7  | 134345052 | 134346865 | CALD1 (-118442), BPGM (+14376)       |
| chr4  | 169522394 | 169522895 | PALLD (+104390), CBR4 (+408764)      |
| chr1  | 202128954 | 202131466 | PTPN7 (+499)                         |
| chr3  | 187494882 | 187495880 | LPP (-435340), BCL6 (-31866)         |
| chr12 | 47587182  | 47587683  | AMIGO2 (-113785), RPAP3 (+512411)    |
| chr12 | 9104193   | 9104694   | M6PR (-1893)                         |
| chrX  | 13108644  | 13110811  | FAM9C (-47007), ATXN3L (+228790)     |
| chr1  | 154434974 | 154436840 | TDRD10 (-39541), IL6R (+58238)       |
| chr2  | 190133693 | 190134194 | WDR75 (-172215), COL5A2 (-89339)     |
| chr11 | 73691308  | 73692660  | UCP2 (+2368), DNAJB13 (+30620)       |
| chr3  | 30695583  | 30701665  | TGFBR2 (+50531), GADL1 (+237633)     |
| chr4  | 153176804 | 153177305 | PET112 (-494880), FBXW7 (+280198)    |
| chr7  | 150381145 | 150385083 | GIMAP2 (+326)                        |
| chr16 | 86698141  | 86698873  | FOXL1 (+86392), FBXO31 (+718856)     |
| chr19 | 2620363   | 2622154   | GNG7 (+81448), GADD45B (+145134)     |
| chr10 | 80807285  | 80808803  | ZMIZ1 (-20748)                       |
| chr9  | 89894854  | 89896324  | GAS1 (-333485), DAPK1 (-217207)      |
| chr20 | 56454096  | 56458027  | PMEP1A1 (-171104), PPP4R1L (+428433) |
| chr20 | 50647963  | 50648464  | SALL4 (-229155), ZFP64 (+160311)     |
| chr1  | 175041055 | 175043057 | TNN (+5062), TNR (+670850)           |
| chr17 | 29633786  | 29650169  | EVI2B (-848)                         |
| chr1  | 185795187 | 185795819 | PRG4 (-469908), HMCN1 (+91820)       |
| chr18 | 52818244  | 52818745  | RAB27B (+323065), TCF4 (+484690)     |
| chr5  | 171541732 | 171542233 | FBXW11 (-108339), STK10 (+73407)     |
| chr10 | 127910902 | 127913512 | ADAM12 (+164817), FANK1 (+327099)    |
| chr2  | 12640610  | 12643109  | TRIB2 (-215155), LPIN1 (+824139)     |
| chr18 | 11324730  | 11326125  | GNAL (-363527), PIEZO2 (-176841)     |
| chr2  | 227756431 | 227756932 | RHBDD1 (+56011), COL4A4 (+272147)    |
| chr16 | 3123625   | 3127344   | IL32 (+10100), ZSCAN10 (+17376)      |
| chr5  | 118645072 | 118645573 | TNFAIP8 (-44686)                     |
| chr14 | 62125660  | 62131456  | HIF1A (-35782), PRKCH (+340123)      |
| chr3  | 195277943 | 195279075 | PPP1R2 (-8300), APOD (+32567)        |
| chr9  | 118089948 | 118090929 | PAPPA (-825644), DEC1 (+186342)      |
| chr13 | 30721843  | 30722344  | UBL3 (-297273), KATNAL1 (+159527)    |
| chr1  | 32354132  | 32356431  | SPOCD1 (-73630), PTP4A2 (+48706)     |
| chr20 | 1637182   | 1638788   | SIRPG (+440)                         |
| chr19 | 1066984   | 1069594   | HMHA1 (+2367), POLR2E (+27309)       |
| chr12 | 65062479  | 65065615  | RASSF3 (+59754), GNS (+89180)        |
| chr15 | 80260773  | 80261274  | ST20-MTHFS (-44938), BCL2A1 (+2764)  |
| chr10 | 31549911  | 31551624  | ZNF438 (-229902), ZEB1 (-57333)      |
| chr12 | 32049950  | 32051066  | BICD1 (-209655), H3F3C (-105333)     |
| chr2  | 158260402 | 158260903 | ERMN (-76428), CYTIP (+40001)        |
| chr10 | 75652751  | 75653252  | CAMK2G (-18659), PLAU (-17913)       |
| chr10 | 121274499 | 121280048 | RGS10 (+24946), GRK5 (+310173)       |

|       |           |           |                                     |
|-------|-----------|-----------|-------------------------------------|
| chr1  | 227952684 | 227954863 | PRSS38 (-49620), SNAP47 (+31077)    |
| chr1  | 173174287 | 173174788 | TNFSF18 (-154435), TNFSF4 (+1914)   |
| chr1  | 40849047  | 40854096  | ZFP69B (-64207), SMAP2 (+12203)     |
| chr12 | 91642427  | 91643273  | DCN (-65950), BTG1 (+896823)        |
| chr18 | 43267038  | 43267539  | SLC14A1 (-39401), SLC14A2 (+72523)  |
| chr5  | 39201777  | 39202851  | RICTOR (-127804), FYB (+68445)      |
| chr10 | 26726483  | 26728913  | APBB1IP (+566)                      |
| chr12 | 91501297  | 91506012  | KERA (-51895), LUM (+1953)          |
| chr12 | 54891525  | 54892026  | NCKAP1L (+281)                      |
| chr1  | 160673198 | 160684227 | SLAMF1 (-61628), CD48 (+2928)       |
| chr13 | 105792122 | 105792623 | DAOA (-326219)                      |
| chr10 | 121261927 | 121262983 | RGS10 (+39765), GRK5 (+295354)      |
| chr9  | 117690791 | 117691438 | TNFSF15 (-122709), TNFSF8 (+1582)   |
| chr8  | 136220380 | 136222406 | ZFAT (-496112), KHDRBS3 (-248307)   |
| chr12 | 91709164  | 91712418  | DCN (-133891), BTG1 (+828882)       |
| chr13 | 46870407  | 46871476  | LCP1 (-85459), ESD (+500425)        |
| chr12 | 58924108  | 58925936  | LRIG3 (+389281), XRCC6BP1 (+589662) |
| chr2  | 86221332  | 86221833  | ST3GAL5 (-105446), POLR1A (+111695) |
| chr13 | 40526807  | 40527308  | COG6 (+297244), FOXO1 (+713676)     |
| chr2  | 197104119 | 197106571 | STK17B (-69046), HECW2 (+351990)    |
| chr7  | 8171487   | 8172527   | ICA1 (+129904), GLCCI1 (+163582)    |
| chr3  | 4560807   | 4561555   | BHLHE40 (-459620), ITPR1 (+26149)   |
| chr9  | 137388497 | 137389354 | COL5A1 (-144694), RXRA (+170500)    |
| chr2  | 238340953 | 238345425 | MLPH (-52622), COL6A3 (-20171)      |
| chr20 | 37985591  | 37986490  | DHX35 (+395063)                     |
| chr12 | 13500519  | 13501167  | EMP1 (+151193), GRIN2B (+632210)    |
| chr1  | 160807559 | 160808214 | CD244 (+24663), LY9 (+41939)        |
| chr19 | 9968456   | 9968957   | PIN1 (+22708), OLFM2 (+78521)       |
| chr22 | 37677463  | 37681142  | CYTH4 (+879)                        |
| chr17 | 66342475  | 66342976  | SLC16A6 (-55469), WIPI1 (+110836)   |
| chr12 | 91433164  | 91433665  | EPYC (-34612), KERA (+18345)        |
| chr7  | 157094270 | 157095964 | DNAJB6 (-34543), UBE3C (+163510)    |
| chr17 | 2162928   | 2163429   | SRR (-43819), HIC1 (+203575)        |
| chr15 | 40597683  | 40602151  | PLCB2 (+206)                        |
| chr1  | 53102274  | 53102908  | FAM159A (+3575), ECHDC2 (+284848)   |
| chr17 | 30829829  | 30832833  | CDK5R1 (+17694), MYO1D (+372864)    |
| chr2  | 38881488  | 38881989  | HNRNPLL (-51568), GALM (-11313)     |
| chr21 | 43536976  | 43537477  | ABCG1 (-102001), UMODL1 (+45801)    |
| chr20 | 62381934  | 62383078  | SLC2A4RG (+11292), ZBTB46 (+80061)  |
| chr10 | 81076835  | 81078171  | PPIF (-29731), ZMIZ1 (+248711)      |
| chr5  | 171601495 | 171603247 | FBXW11 (-168727), STK10 (+13019)    |
| chr19 | 36421245  | 36422450  | LRFN3 (-4604)                       |
| chr10 | 32034113  | 32035228  | ARHGAP12 (+183064), ZEB1 (+426570)  |
| chr6  | 1113615   | 1117208   | EXOC2 (-422301), FOXQ1 (-197263)    |
| chr19 | 31868683  | 31869419  | ZNF507 (-967449), TSHZ3 (-28598)    |
| chr13 | 41060348  | 41060849  | FOXO1 (+180135), COG6 (+830785)     |
| chr10 | 64393655  | 64401355  | ADO (-167011), ZNF365 (+263554)     |
| chr2  | 69001312  | 69002917  | ARHGAP25 (+40148), BMP10 (+96534)   |
| chr11 | 119133841 | 119134342 | MCAM (+53734), CBL (+57340)         |
| chr8  | 59713297  | 59713978  | NSMAF (-141545), TOX (+318129)      |
| chr14 | 62605118  | 62606702  | SYT16 (+143369), KCNH5 (+906263)    |
| chr1  | 209938298 | 209949596 | TRAF3IP3 (+12104), IRF6 (+35442)    |
| chr6  | 45295697  | 45296380  | RUNX2 (-67)                         |
| chr4  | 159041323 | 159042433 | FAM198B (+52324), GRIA2 (+900008)   |
| chr4  | 154965437 | 154966636 | SFRP2 (-255765), DCHS2 (+346412)    |
| chr1  | 151870409 | 151871339 | THEM5 (-44701), THEM4 (+11410)      |

|       |           |           |                                             |
|-------|-----------|-----------|---------------------------------------------|
| chr8  | 126524937 | 126527141 | TRIB1 (+83476)                              |
| chr20 | 35597672  | 35598173  | SAMHD1 (-17677), RBL1 (+126475)             |
| chr6  | 42334521  | 42336009  | MRPS10 (-149662), TRERF1 (+84518)           |
| chr21 | 46344392  | 46353938  | ITGB2 (-377)                                |
| chr2  | 8627644   | 8629212   | ID2 (-190547)                               |
| chr7  | 94033188  | 94035021  | CASD1 (-105005), COL1A2 (+10232)            |
| chr9  | 129278354 | 129280561 | LMX1B (-97264), MVB12B (+190330)            |
| chr12 | 8216189   | 8220784   | C3AR1 (+580)                                |
| chr6  | 5831501   | 5832405   | NRN1 (+175247), FARS2 (+570676)             |
| chr3  | 132312326 | 132314393 | ACKR4 (-2721)                               |
| chr2  | 109647820 | 109649354 | SH3RF3 (-97410), EDAR (-42759)              |
| chr11 | 59946801  | 59957275  | MS4A6A (-1342)                              |
| chr16 | 88748158  | 88749060  | MVD (-19091), SNAI3 (+4292)                 |
| chr13 | 30950222  | 30950883  | KATNAL1 (-68932), HMGB1 (+241181)           |
| chr4  | 872653    | 873154    | CPLX1 (-52918), GAK (+53182)                |
| chr20 | 37987057  | 37987558  | DHX35 (+396330)                             |
| chr13 | 40962540  | 40963041  | FOXO1 (+277943), COG6 (+732977)             |
| chr7  | 43698383  | 43699581  | BLVRA (-99304), COA1 (-9087)                |
| chr11 | 118094300 | 118095694 | AMICA1 (+812)                               |
| chr2  | 192066270 | 192068066 | STAT4 (-51182), MYO1B (-42947)              |
| chr7  | 150411254 | 150416968 | GIMAP1 (+466)                               |
| chr21 | 36930408  | 36938875  | RUNX1 (-513001), SETD4 (+497917)            |
| chr16 | 88330652  | 88334320  | ZNF469 (-161393), BANP (+328862)            |
| chr3  | 184503053 | 184505137 | VPS8 (-25836), EPHB3 (+224523)              |
| chr7  | 17569315  | 17576451  | AHR (+234637), SNX13 (+407234)              |
| chr9  | 132032947 | 132034209 | NTMT1 (-337585), PPP2R4 (+159981)           |
| chr8  | 8190090   | 8192783   | ENSG00000182319 (+52571), ZNF705B (+390293) |
| chr2  | 200674847 | 200675681 | SATB2 (-352445), FTCDNL1 (+40602)           |
| chr18 | 43829573  | 43831219  | RNF165 (-83791), C18orf25 (+76403)          |
| chr11 | 118076689 | 118077999 | SCN2B (-29956), AMICA1 (+18465)             |
| chr4  | 10034662  | 10035477  | SLC2A9 (-11963), WDR1 (+83414)              |
| chr1  | 114413614 | 114415114 | PTPN22 (+17)                                |
| chr6  | 35278323  | 35280214  | PPARD (-31122), DEF6 (+13640)               |
| chr5  | 171539751 | 171540252 | FBXW11 (-106358), STK10 (+75388)            |
| chr16 | 53551465  | 53553732  | AKTIP (-15436), RPGRIP1L (+185159)          |
| chr3  | 183269676 | 183274583 | MCF2L2 (-126067), KLHL6 (+1347)             |
| chr13 | 41578570  | 41579071  | ELF1 (+14629), SLC25A15 (+215188)           |
| chr2  | 220522695 | 220523196 | SLC4A3 (+30654)                             |
| chr12 | 31985341  | 31986234  | BICD1 (-274375), H3F3C (-40613)             |
| chr7  | 150208548 | 150218722 | GIMAP4 (-50730), GIMAP7 (+1717)             |
| chr6  | 109223413 | 109224098 | SESN1 (+192266), FOXO3 (+341687)            |
| chr8  | 126942546 | 126943847 | TRIB1 (+500634), FAM84B (+627441)           |
| chr16 | 88856370  | 88857757  | CDT1 (-12557), PIEZO1 (-5445)               |
| chr2  | 74793231  | 74807042  | DOK1 (+18924), M1AP (+75027)                |
| chr2  | 234239865 | 234240366 | DGKD (-23037), SAG (+23649)                 |
| chr11 | 88147689  | 88149288  | CTSC (-77534), GRM5 (+648327)               |
| chr1  | 200319922 | 200324451 | ZNF281 (+56997), NR5A2 (+325457)            |
| chr1  | 222167550 | 222168493 | DUSP10 (-252504), HHIPL2 (+553423)          |
| chr7  | 94053938  | 94055975  | CASD1 (-84153), COL1A2 (+31084)             |
| chr16 | 57073097  | 57077189  | NLRC5 (+51733), FAM192A (+144833)           |
| chr4  | 86622506  | 86623007  | ARHGAP24 (+226490), MAPK10 (+658459)        |
| chr16 | 50299483  | 50302106  | ADCY7 (+368)                                |
| chr2  | 197047568 | 197048069 | STK17B (-11520), HECW2 (+409516)            |
| chr16 | 30482689  | 30483569  | ITGAL (-850)                                |
| chr3  | 23817506  | 23819621  | UBE2E1 (-28830), UBE2E2 (+573780)           |
| chr1  | 172376929 | 172378090 | PIGC (+35716), DNM3 (+566889)               |



|       |           |           |                                        |
|-------|-----------|-----------|----------------------------------------|
| chr5  | 36724881  | 36725382  | NIPBL (-151729), SLC1A3 (+118675)      |
| chr17 | 39463141  | 39466238  | KRTAP16-1 (+815)                       |
| chr10 | 64144312  | 64144813  | ADO (-419953), ZNF365 (+10612)         |
| chr19 | 6669610   | 6670451   | TNFSF14 (+568)                         |
| chr21 | 26934008  | 26935306  | MRPL39 (+45172)                        |
| chr5  | 169064154 | 169065159 | DOCK2 (+406)                           |
| chr7  | 94029484  | 94032561  | CASD1 (-108087), COL1A2 (+7150)        |
| chr2  | 231521254 | 231534881 | CAB39 (-49492), SP100 (+247087)        |
| chr12 | 111494753 | 111495604 | CUX2 (+23351), FAM109A (+311746)       |
| chr8  | 124489270 | 124489771 | WDYHV1 (+60556), FBXO32 (+63925)       |
| chr12 | 43150066  | 43151845  | PRICKLE1 (-273159), ADAMTS20 (+794768) |
| chr18 | 33888263  | 33891279  | FHOD3 (+12094), TPGS2 (+519387)        |
| chr6  | 126123668 | 126124456 | HINT3 (-153865), NCOA7 (+21755)        |
| chr7  | 150371785 | 150377138 | GIMAP6 (-44989), GIMAP2 (-8326)        |
| chr17 | 34216999  | 34217648  | CCL5 (-9812), RDM1 (+40453)            |
| chr11 | 104574119 | 104580050 | PDGFD (-542250), CASP12 (+192075)      |
| chr4  | 169471353 | 169472056 | PALLD (+53450), CBR4 (+459704)         |
| chr5  | 39268963  | 39276276  | FYB (-1861)                            |
| chr13 | 37747922  | 37751456  | CSNK1A1L (-69886), POSTN (+423292)     |
| chr12 | 47668883  | 47673182  | AMIGO2 (-197385), RPAP3 (+428811)      |
| chr4  | 77702638  | 77705501  | SEPT11 (-166786), SHROOM3 (+347817)    |
| chr8  | 66893630  | 66894131  | PDE7A (-139694), DNAJC5B (-39914)      |
| chr1  | 40861982  | 40862483  | ZFP69B (-53546), SMAP2 (+22864)        |
| chr17 | 65430636  | 65431137  | NOL11 (-283062), PITPNC1 (+56616)      |
| chr16 | 64372782  | 64374382  | CDH11 (+782519)                        |
| chr10 | 88403096  | 88403740  | WAPAL (-121846), OPN4 (-10896)         |
| chr4  | 158940902 | 158942920 | FAM198B (+152291), GRIA2 (+800041)     |
| chr8  | 100511161 | 100511861 | COX6C (+394779), VPS13B (+486017)      |
| chr7  | 150372122 | 150376428 | GIMAP6 (-44802), GIMAP2 (-8513)        |
| chr9  | 137700888 | 137704564 | FCN2 (-69932), COL5A1 (+169106)        |
| chr10 | 33595101  | 33595602  | ITGB1 (-348530), NRP1 (+29838)         |
| chr10 | 6342085   | 6342973   | PFKFB3 (+97635), PRKCQ (+279734)       |
| chr18 | 29620393  | 29620894  | RNF138 (-51174), RNF125 (+22309)       |
| chr12 | 106451944 | 106452657 | APPL2 (-822440), NUAK1 (+81510)        |
| chr7  | 148260765 | 148262620 | CUL1 (-134311)                         |
| chr1  | 60162694  | 60163636  | HOOK1 (-117368), FGGY (+400512)        |
| chr16 | 30194226  | 30199186  | SLX1A (-8532), CORO1A (+1963)          |
| chr2  | 196423786 | 196425776 | SLC39A10 (-96690)                      |
| chr7  | 43684492  | 43691849  | COA1 (+1724), STK17A (+65507)          |
| chr12 | 12959588  | 12962558  | DDX47 (-5207), APOLD1 (+82208)         |
| chr6  | 166900491 | 166903707 | MPC1 (-105613), RPS6KA2 (+373940)      |
| chr6  | 149350624 | 149359402 | TAB2 (-287175), UST (+286549)          |
| chr8  | 29106953  | 29108464  | KIF13B (+12881), HMBOX1 (+359788)      |
| chr16 | 56881996  | 56885191  | SLC12A3 (-15525), NUP93 (+119577)      |
| chr20 | 55449599  | 55451599  | TFAP2C (+246241), BMP7 (+391085)       |
| chr9  | 137383598 | 137384099 | COL5A1 (-149771), RXRA (+165423)       |
| chr6  | 160883838 | 160884339 | SLC22A3 (+114789), LPA (+203318)       |
| chr3  | 32501009  | 32502458  | CMTM6 (+43166), CMTM7 (+68571)         |
| chr1  | 19802614  | 19804555  | CAPZB (+8394), PQLC2 (+164763)         |
| chr6  | 121870009 | 121870510 | HSF2 (-850431), GJA1 (+113422)         |
| chr17 | 16891331  | 16892380  | MPRIIP (-54218), TNFRSF13B (-16454)    |
| chrX  | 43502938  | 43503712  | MAOA (-12142)                          |
| chr19 | 6798663   | 6804470   | EMR1 (-86016), VAV1 (+28830)           |
| chr10 | 5335533   | 5336613   | UCN3 (-70899), AKR1C4 (+98647)         |
| chr13 | 43565058  | 43567211  | DNAJC15 (-31204), TNFSF11 (+417846)    |
| chr12 | 109022139 | 109029560 | SELPLG (+4)                            |

|       |           |           |                                       |
|-------|-----------|-----------|---------------------------------------|
| chr10 | 33402491  | 33403612  | ITGB1 (-156230), NRP1 (+222138)       |
| chr1  | 172349811 | 172350469 | PIGC (+63086), DNM3 (+539519)         |
| chr16 | 3626203   | 3629103   | SLX4 (+33946), CLUAP1 (+76729)        |
| chr2  | 151465503 | 151466460 | RND3 (-121801), RBM43 (+652411)       |
| chr1  | 160546790 | 160548253 | SLAMF6 (-54479), CD84 (+1772)         |
| chr13 | 38114749  | 38115916  | CSNK1A1L (-435530), POSTN (+57648)    |
| chr8  | 8654930   | 8655431   | ERI1 (-204476), CLDN23 (+95733)       |
| chr10 | 13755110  | 13755611  | PRPF18 (+126434), FRMD4A (+617522)    |
| chr8  | 23075553  | 23078628  | TNFRSF10D (-55548), TNFRSF10A (+5548) |
| chr16 | 89830658  | 89831369  | ZNF276 (+43062), FANCA (+52040)       |
| chr19 | 17961036  | 17962004  | JAK3 (-2679)                          |
| chr16 | 88219671  | 88222259  | ZNF469 (-272914), BANP (+217341)      |
| chr22 | 27620065  | 27620566  | MN1 (+577170), CRYBA4 (+602388)       |
| chr17 | 33866635  | 33868835  | SLFN12L (-52859), SLFN14 (+17382)     |
| chr19 | 35702353  | 35705543  | FAM187B (+15684), FXYD5 (+58272)      |
| chr11 | 1778768   | 1780411   | IFITM10 (-7769), CTSD (+5632)         |
| chr4  | 13889821  | 13896144  | BOD1L1 (-263636)                      |
| chr2  | 176162    | 176663    | FAM110C (-130028), SH3YL1 (+87652)    |
| chr12 | 76337548  | 76339065  | KRR1 (-432906), PHLDA1 (+89405)       |
| chr1  | 117045742 | 117047782 | CD58 (+66899), ATP1A1 (+130273)       |
| chr12 | 91718542  | 91723221  | DCN (-143982), BTG1 (+818791)         |
| chr18 | 32609792  | 32610293  | MAPRE2 (-11281), DTNA (+436740)       |
| chr1  | 172309984 | 172314586 | PIGC (+100941), DNM3 (+501664)        |
| chr6  | 159070544 | 159071045 | SYTL3 (-11556), DYNLT1 (-5024)        |
| chr18 | 13463779  | 13465718  | LDLRAD4 (+245963), FAM210A (+261810)  |
| chr2  | 192348908 | 192355440 | NABP1 (-191084), MYO1B (+242059)      |
| chr5  | 149446031 | 149446841 | TIGD6 (-65706), CSF1R (+46499)        |
| chr12 | 92428118  | 92429798  | DCN (-852058), BTG1 (+110715)         |
| chr17 | 29644372  | 29646300  | EVI2B (-4206)                         |
| chr20 | 31125183  | 31128478  | ASXL1 (+180676), COMMD7 (+204972)     |
| chr1  | 100866352 | 100866853 | GPR88 (-137090), CDC14A (+48556)      |
| chr6  | 109216649 | 109217299 | SESN1 (+199048), FOXO3 (+334905)      |
| chr1  | 28318780  | 28319420  | XKR8 (+33127), EYA3 (+96107)          |
| chr21 | 36874963  | 36878687  | RUNX1 (-455184), SETD4 (+555734)      |
| chr1  | 42268497  | 42269714  | EDN2 (-318764), HIVEP3 (+115063)      |
| chr10 | 121275239 | 121279381 | RGS10 (+24910), GRK5 (+310209)        |
| chr9  | 89019371  | 89024667  | ZCCHC6 (-52692), GAS1 (+540085)       |
| chr17 | 33814464  | 33815223  | SLFN12L (+32)                         |
| chr3  | 156200711 | 156202664 | SSR3 (+71285), KCNAB1 (+363351)       |
| chr2  | 189585883 | 189586576 | COL3A1 (-252816), GULP1 (+428671)     |
| chr2  | 8655857   | 8656675   | ID2 (-162709)                         |
| chr1  | 59407900  | 59408799  | FGGY (-354303), JUN (-158565)         |
| chr5  | 14593606  | 14595485  | FAM105B (-70311), TRIO (+450735)      |
| chr15 | 81587509  | 81592244  | STARD5 (+26589), IL16 (+72136)        |
| chr19 | 42702944  | 42707084  | POU2F2 (-68435), DEDD2 (+19261)       |
| chr6  | 112349470 | 112349971 | FYN (-155066), WISP3 (-25741)         |
| chr11 | 117873107 | 117874886 | TMPRSS4 (-73807), IL10RA (+16934)     |
| chr4  | 185434616 | 185436596 | IRF2 (-39872), CASP3 (+135023)        |
| chr17 | 28032471  | 28034410  | CORO6 (-83524), SSH2 (+223729)        |
| chr12 | 68375326  | 68375827  | IFNG (+177950), DYRK2 (+333076)       |
| chr7  | 2913498   | 2914137   | GNA12 (-29860), CARD11 (+169761)      |
| chr16 | 10847178  | 10847880  | NUBP1 (+9827), TVP23A (+65113)        |
| chr10 | 4011915   | 4012416   | AKR1E2 (-856280), KLF6 (-184699)      |
| chr2  | 74409171  | 74409672  | MOB1A (-3427)                         |
| chr16 | 30613307  | 30613808  | ZNF785 (-16466), ZNF689 (+8142)       |
| chr3  | 100289211 | 100289712 | GPR128 (-38971), TMEM45A (+77999)     |

|       |           |           |                                      |
|-------|-----------|-----------|--------------------------------------|
| chr11 | 19744960  | 19745987  | NAV2 (+10331), DBX1 (+436396)        |
| chr2  | 58334724  | 58335854  | FANCL (+133196), VRK2 (+200503)      |
| chr6  | 129992864 | 129995422 | ARHGAP18 (+37227), LAMA2 (+789801)   |
| chr19 | 14466506  | 14467172  | LPHN1 (-149840), CD97 (-25417)       |
| chr21 | 36360210  | 36360711  | RUNX1 (+61180), CLIC6 (+318773)      |
| chrX  | 12972766  | 12976504  | TMSB4X (-18594), TLR8 (+49896)       |
| chr12 | 113344072 | 113346679 | OAS1 (+788)                          |
| chr14 | 65800530  | 65802403  | MAX (-232279), FUT8 (-75843)         |
| chr20 | 9969186   | 9970654   | PAK7 (-150231), ANKEF1 (-45777)      |
| chr17 | 37288734  | 37291858  | PLXDC1 (+17606), LASP1 (+264184)     |
| chr13 | 99880717  | 99881968  | UBAC2 (+28315), GPR18 (+32655)       |
| chr1  | 160537286 | 160538825 | SLAMF6 (-45013), CD84 (+11238)       |
| chr2  | 225811124 | 225812366 | CUL3 (-361680), DOCK10 (+95414)      |
| chr14 | 76287831  | 76290529  | TGFB3 (+158354), TTLL5 (+161559)     |
| chr2  | 175710228 | 175710875 | CHRNA1 (-81363), CHN1 (+159402)      |
| chr9  | 100864943 | 100865444 | TRIM14 (+16286), NANS (+46173)       |
| chr19 | 48760896  | 48761942  | CARD8 (-17099), ZNF114 (-11940)      |
| chr14 | 95989640  | 95991004  | SYNE3 (-48149), GLRX5 (-10608)       |
| chr5  | 86414044  | 86419655  | RASA1 (-146855), COX7C (+503077)     |
| chr14 | 61804254  | 61804755  | HIF1A (-359835), PRKCH (+16070)      |
| chr5  | 66517833  | 66518334  | PIK3R1 (-993464), CD180 (-25457)     |
| chr17 | 47286804  | 47289162  | GNGT2 (-1221), ABI3 (+394)           |
| chr19 | 4914846   | 4916971   | KDM4B (-53223), PLIN3 (-48129)       |
| chr10 | 70981574  | 70982908  | HK1 (-66259), HKDC1 (+2182)          |
| chr2  | 68961387  | 68962580  | ARHGAP25 (+17)                       |
| chr1  | 205256535 | 205257464 | NUAK2 (+33883), TMCC2 (+59696)       |
| chr1  | 234910864 | 234911529 | IRF2BP2 (-165926), TOMM20 (+381054)  |
| chr1  | 209928973 | 209930566 | TRAF3IP3 (-2073)                     |
| chr6  | 31552912  | 31556802  | LTB (-4655), LST1 (-120)             |
| chr3  | 46411775  | 46412430  | CCR5 (+470)                          |
| chr6  | 106966700 | 106968889 | AIM1 (+8065), RTN4IP1 (+109567)      |
| chr6  | 139854406 | 139856028 | CITED2 (-159460)                     |
| chr15 | 75422849  | 75423350  | GOLGA6C (-127840), PPCDC (+107204)   |
| chr21 | 43481807  | 43483394  | ZBTB21 (-52135), UMODL1 (-8825)      |
| chr3  | 183272764 | 183273925 | KLHL6 (+132)                         |
| chr2  | 238349311 | 238350898 | MLPH (-45706), COL6A3 (-27087)       |
| chr8  | 124850068 | 124853438 | ANXA13 (-102111), FER1L6 (-12474)    |
| chr1  | 40858079  | 40858719  | ZFP69B (-57380), SMAP2 (+19030)      |
| chr21 | 36398534  | 36400985  | RUNX1 (+21881), CLIC6 (+358072)      |
| chr10 | 33410981  | 33411769  | ITGB1 (-164553), NRP1 (+213815)      |
| chr19 | 52292857  | 52293358  | FPR3 (-5308), FPR2 (+27095)          |
| chr7  | 3134221   | 3135409   | SDK1 (-206265), CARD11 (-51236)      |
| chr2  | 190275839 | 190278323 | COL5A2 (-232476), WDR75 (-29078)     |
| chr6  | 137957865 | 137958366 | TNFAIP3 (-230465), OLIG3 (-142585)   |
| chr13 | 31313686  | 31315287  | MEDAG (-165841), ALOX5AP (+4842)     |
| chr19 | 40447016  | 40447783  | PSMC4 (-29512), FCGBP (-6867)        |
| chr6  | 126120050 | 126120849 | HINT3 (-157477), NCOA7 (+18143)      |
| chr14 | 25143255  | 25143944  | GZMB (-40127), STXBP6 (+375903)      |
| chr9  | 126978560 | 126981534 | NEK6 (-40195), LHX2 (+206158)        |
| chr21 | 46339171  | 46341609  | PTTG1IP (-46638), ITGB2 (+8398)      |
| chr14 | 52042207  | 52043204  | FRMD6 (-75959), TMX1 (+335820)       |
| chrX  | 39631273  | 39631774  | BCOR (+325132), MID1IP1 (+968538)    |
| chr12 | 58922206  | 58923568  | LRIG3 (+391416), XRCC6BP1 (+587527)  |
| chr19 | 42054876  | 42056844  | ATP5SL (-110416), CEACAM21 (-26741)  |
| chr16 | 89381457  | 89384884  | ZNF778 (+99053), ANKRD11 (+173798)   |
| chr2  | 96981003  | 96982367  | SNRNP200 (-10432), ITPRIPL1 (-10250) |

|       |           |           |                                     |
|-------|-----------|-----------|-------------------------------------|
| chr3  | 56815666  | 56821605  | CCDC66 (+227435), ARHGEF3 (+294700) |
| chr6  | 114126677 | 114127178 | MARCKS (-51613)                     |
| chr3  | 188849388 | 188851197 | TPRG1 (-39470), LPP (+919572)       |
| chr10 | 4015074   | 4016110   | AKR1E2 (-852854), KLF6 (-188125)    |
| chr5  | 169729353 | 169730452 | LCP2 (-4672)                        |
| chr20 | 51109214  | 51110243  | TSHZ2 (-479217), ZFP64 (-301204)    |
| chr15 | 31555089  | 31558521  | TRPM1 (-103329), KLF13 (-62253)     |
| chr14 | 91143716  | 91144513  | CALM1 (+280788), RPS6KA5 (+382837)  |
| chr6  | 106348327 | 106349228 | PREP (-497819), PRDM1 (-185417)     |
| chr1  | 169013128 | 169013629 | DPT (-314877), ATP1B1 (-61556)      |
| chr14 | 53574756  | 53575619  | FERMT2 (-157373), DDHD1 (+44628)    |
| chr11 | 86431107  | 86431608  | PRSS23 (-79924), ME3 (-47680)       |
| chr1  | 161921867 | 161924093 | OLFML2B (+70664), ATF6 (+186896)    |
| chr15 | 70550812  | 70551596  | TLE3 (-160689), UACA (+504728)      |
| chr18 | 53166790  | 53169318  | TCF4 (+135131), RAB27B (+672624)    |
| chr5  | 169703621 | 169707635 | LCP2 (+19603), FOXI1 (+172727)      |
| chr14 | 90147733  | 90148234  | FOXN3 (-62510), EFCAB11 (+273049)   |
| chr20 | 46437923  | 46438424  | SULF2 (-22844)                      |
| chr10 | 6389510   | 6390805   | PFKFB3 (+145264), PRKCQ (+232105)   |
| chr20 | 61369986  | 61374299  | MRGBP (-55662), NTSR1 (+31954)      |
| chr2  | 189391069 | 189393531 | COL3A1 (-446746), GULP1 (+234741)   |
| chr9  | 5493891   | 5494392   | PDCD1LG2 (-16428), CD274 (+43617)   |
| chr22 | 37702758  | 37705707  | CYTH4 (+25809), ELFN2 (+119272)     |
| chr13 | 40683335  | 40684448  | COG6 (+454078), FOXO1 (+556842)     |
| chr7  | 150145231 | 150151478 | GIMAP8 (+637)                       |
| chr9  | 92137281  | 92138880  | SEMA4D (-104333), GADD45G (-81847)  |
| chr16 | 17462352  | 17464492  | XYLT1 (+101316)                     |
| chr2  | 100386373 | 100386874 | REV1 (-280127), AFF3 (+335421)      |
| chr17 | 72733141  | 72735676  | SLC9A3R1 (-10382), RAB37 (+1353)    |
| chr4  | 71813098  | 71813599  | DCK (-45807), MOB1B (+45254)        |
| chr17 | 37236440  | 37239918  | PLXDC1 (+69723), LASP1 (+212067)    |
| chr5  | 95206033  | 95206534  | GLRX (-47866), ELL2 (+91491)        |
| chr21 | 36354854  | 36356333  | RUNX1 (+66047), CLIC6 (+313906)     |
| chr16 | 88331619  | 88333206  | ZNF469 (-161466), BANP (+328789)    |
| chr17 | 29135523  | 29137058  | CRLF3 (+15503), TBC1D29 (+252161)   |
| chr11 | 116722133 | 116725465 | APOA1 (-15133), SIK3 (+245194)      |
| chr12 | 104856743 | 104857413 | CHST11 (+6327), SLC41A2 (+465355)   |
| chr8  | 1969121   | 1969622   | MYOM2 (-23783), ARHGEF10 (+197230)  |
| chr9  | 134112734 | 134114005 | PPAPDC3 (-51711), NUP214 (+112422)  |
| chr11 | 95947612  | 95951258  | MTMR2 (-291976), MAML2 (+126909)    |
| chr12 | 7059736   | 7063759   | PTPN6 (+1314), PHB2 (+18240)        |
| chr9  | 92769617  | 92770426  | GADD45G (+550094), DIRAS2 (+635364) |
| chr1  | 172236426 | 172237231 | PIGC (+176397), DNMT3 (+426208)     |
| chr12 | 25204480  | 25206355  | LRMP (-28)                          |
| chr11 | 59951244  | 59951947  | MS4A6A (-900)                       |
| chr14 | 81930851  | 81931352  | STON2 (-37354), SEL1L (+69103)      |
| chr17 | 37248551  | 37249548  | PLXDC1 (+58852), LASP1 (+222938)    |
| chr9  | 139928978 | 139929970 | FUT7 (-2012)                        |
| chr17 | 37250516  | 37253763  | PLXDC1 (+55762), LASP1 (+226028)    |
| chr2  | 163095050 | 163103625 | FAP (+707)                          |
| chr3  | 46339555  | 46340209  | CCR2 (-55353), CCR3 (+56010)        |
| chr15 | 40599274  | 40601382  | PLCB2 (-205)                        |
| chr14 | 77769373  | 77770197  | NGB (-32130), GSTZ1 (-17442)        |
| chr1  | 200321003 | 200323517 | ZNF281 (+56924), NR5A2 (+325530)    |
| chr14 | 100530645 | 100532492 | EVL (-46)                           |
| chr10 | 125823632 | 125825208 | CPXM2 (-173090), CHST15 (+27550)    |

|       |           |           |                                    |
|-------|-----------|-----------|------------------------------------|
| chr16 | 21656379  | 21656880  | IGSF6 (+7351), METTL9 (+45833)     |
| chr19 | 10237239  | 10237969  | EIF3G (-7026), DNMT1 (+68151)      |
| chr1  | 244482352 | 244483977 | ADSS (+132271), ZBTB18 (+268580)   |
| chr1  | 236161734 | 236163578 | LYST (-132436), NID1 (+65806)      |
| chr7  | 150452170 | 150453930 | TMEM176A (-44441), GIMAP5 (+18614) |
| chr10 | 63156164  | 63159239  | RHOBTB1 (-453697), TMEM26 (+55506) |
| chr2  | 37851038  | 37853990  | CDC42EP3 (+46820), QPCT (+280797)  |
| chr21 | 36847647  | 36849059  | RUNX1 (-426712), SETD4 (+584206)   |
| chr2  | 46264346  | 46264984  | EPAS1 (-259876), PRKCE (+385752)   |
| chr16 | 28995388  | 28997268  | LAT (+181)                         |
| chr18 | 72781577  | 72783598  | ZADH2 (+138715), ZNF407 (+439612)  |
| chr7  | 143070590 | 143073436 | ZYX (-6160), CLCN1 (+58794)        |
| chr9  | 123884120 | 123884621 | CNTRL (+47081), RAB14 (+79776)     |
| chr16 | 10842292  | 10842793  | NUBP1 (+4841), TVP23A (+70099)     |
| chr1  | 28195193  | 28196487  | THEMIS2 (-3239)                    |
| chr9  | 447906    | 448666    | KANK1 (-22005), DOCK8 (+233421)    |
| chr17 | 17306684  | 17308048  | MED9 (-72934), NT5M (+100717)      |
| chr19 | 15574775  | 15575957  | RASAL3 (+11)                       |
| chr21 | 45772344  | 45774334  | TRPM2 (+200)                       |
| chr5  | 169702342 | 169702843 | LCP2 (+22638), FOXI1 (+169692)     |
| chr1  | 59483864  | 59487309  | FGGY (-277066), JUN (-235802)      |
| chr6  | 24741103  | 24746497  | GMNN (-31366), C6orf62 (-22736)    |
| chr18 | 10101836  | 10102337  | APCDD1 (-352538), VAPA (+188028)   |
| chr11 | 122598129 | 122598630 | CRTAM (-110828), UBASH3B (+71997)  |
| chr2  | 28446118  | 28448778  | RBKS (-333483), FOSL2 (-168277)    |
| chr2  | 99374024  | 99377468  | MGAT4A (-28157), TSGA10 (+395634)  |
| chr11 | 128597228 | 128599203 | FLI1 (+34326), KCNJ1 (+114213)     |
| chr10 | 121065088 | 121066468 | GRK5 (+98677), RGS10 (+236442)     |
| chr6  | 137557787 | 137563597 | IFNGR1 (-20106), OLIG3 (+254839)   |
| chr7  | 150263965 | 150267361 | GIMAP4 (+1298), GIMAP6 (+63810)    |
| chr5  | 153600269 | 153601875 | SAP30L (-224445), GALNT10 (+30782) |
| chr9  | 134127550 | 134132517 | PPAPDC3 (-35047), NUP214 (+129086) |
| chr19 | 48752097  | 48754091  | ZNF114 (-20265), CARD8 (-8774)     |
| chr5  | 18745753  | 18746516  | NONE                               |
| chr19 | 8581858   | 8584003   | ZNF414 (-3887)                     |
| chr13 | 42036993  | 42040214  | RGCC (+6909), VWAA8 (+496616)      |
| chr18 | 56603899  | 56604400  | SEC11C (-202559), ZNF532 (+74318)  |
| chr7  | 150412541 | 150415176 | GIMAP1 (+214)                      |
| chr2  | 136995738 | 136997876 | THSD7B (-642942), CXCR4 (-122994)  |
| chr1  | 89828213  | 89830309  | GBP6 (-356)                        |
| chr11 | 128594963 | 128596677 | FLI1 (+31930), KCNJ1 (+116609)     |
| chr17 | 57829297  | 57836958  | VMP1 (+48302), TUBD1 (+137168)     |
| chr6  | 159460030 | 159460531 | EZR (-219837), TAGAP (+5903)       |
| chr18 | 66095722  | 66096223  | DSEL (-911756), TMX3 (+286562)     |
| chr14 | 90186457  | 90187214  | FOXN3 (-101362), EFCAB11 (+234197) |
| chr12 | 55329366  | 55330071  | TESPA1 (+48737), MUCL1 (+81398)    |
| chr6  | 152621232 | 152624712 | SYNE1 (+335562), ESR1 (+611341)    |
| chr16 | 10843422  | 10844482  | NUBP1 (+6250), TVP23A (+68690)     |
| chr21 | 36416475  | 36426325  | RUNX1 (+241)                       |
| chr14 | 91839146  | 91839776  | GPR68 (-119192), CCDC88C (+44660)  |
| chr19 | 17515957  | 17518598  | BST2 (-821)                        |
| chr1  | 206943174 | 206944645 | IL10 (+1929), MAPKAPK2 (+85528)    |
| chr18 | 28827388  | 28828595  | DSC1 (-85173), DSG1 (-70060)       |
| chr5  | 71768208  | 71768709  | ZNF366 (+35095), PTC2 (+152265)    |
| chr3  | 62587544  | 62591509  | FEZF2 (-230337), CADPS (+271527)   |
| chr12 | 96893893  | 96896976  | NEDD1 (-405809), CDK17 (-101097)   |

|       |           |           |                                             |
|-------|-----------|-----------|---------------------------------------------|
| chrX  | 128910405 | 128911949 | SASH3 (-2783)                               |
| chr20 | 56201855  | 56205528  | ZBP1 (-8163), PMEPA1 (+81266)               |
| chr2  | 65144854  | 65145355  | SERTAD2 (-264058), SLC1A4 (-71430)          |
| chr6  | 45404087  | 45405766  | SUPT3H (-59257), CLIC5 (+643205)            |
| chr4  | 79582429  | 79584566  | BMP2K (-114034), ANXA3 (+110825)            |
| chr1  | 25348473  | 25350761  | RUNX3 (-58116), SYF2 (+209367)              |
| chr4  | 184270084 | 184270967 | CDKN2AIP (-95218), CLDN24 (-26947)          |
| chr11 | 12197519  | 12198020  | MICALCL (-110677), MICAL2 (+65632)          |
| chr4  | 79575584  | 79581698  | BMP2K (-118891), ANXA3 (+105968)            |
| chr11 | 89223655  | 89225289  | NOX4 (+181)                                 |
| chr5  | 14810152  | 14811186  | ANKH (+61218), FAM105B (+145812)            |
| chr7  | 38397943  | 38398838  | STARD3NL (+180567), AMPH (+272776)          |
| chr6  | 32908388  | 32909938  | HLA-DMB (-316)                              |
| chr5  | 39273829  | 39275612  | FYB (-3962)                                 |
| chr20 | 42569312  | 42573204  | TOX2 (+27766), JPH2 (+244960)               |
| chr20 | 52258467  | 52260792  | ZNF217 (-49252), BCAS1 (+427503)            |
| chr3  | 50627666  | 50629157  | CISH (+20791), HEMK1 (+21784)               |
| chr7  | 150178290 | 150182989 | GIMAP7 (-31278), GIMAP8 (+32922)            |
| chr4  | 140578301 | 140580270 | SETD7 (-101358), MGST2 (-7636)              |
| chr16 | 17542693  | 17543366  | XYLT1 (+21708)                              |
| chr1  | 33564360  | 33566423  | ADC (+18678), TRIM62 (+81875)               |
| chr9  | 128411965 | 128414231 | MAPKAP1 (+56415), GAPVD1 (+388987)          |
| chr20 | 3400661   | 3401398   | SLC4A11 (-182218), ATRN (-50657)            |
| chr1  | 172363257 | 172364981 | PIGC (+49107), DNM3 (+553498)               |
| chr9  | 132707073 | 132708980 | FNBP1 (+97414), USP20 (+110278)             |
| chr1  | 159045924 | 159047772 | AIM2 (-157)                                 |
| chr6  | 130008264 | 130008765 | ARHGAP18 (+22855), LAMA2 (+804173)          |
| chr7  | 150210775 | 150215789 | GIMAP4 (-51083), GIMAP7 (+1364)             |
| chr8  | 8200372   | 8206726   | ENSG00000182319 (+40459), ZNF705B (+402405) |
| chr6  | 14275982  | 14278316  | JARID2 (-969378), CD83 (+159277)            |
| chr22 | 37879739  | 37882927  | ELFN2 (-57828), MFNG (+1106)                |
| chr8  | 134085147 | 134089582 | WISP1 (-115917), SLA (-14762)               |
| chr3  | 152938773 | 152940704 | ARHGEF26 (-899053), RAP2B (+59710)          |
| chr9  | 86911454  | 86911955  | SLC28A3 (+43893), RMI1 (+315992)            |
| chr17 | 80356721  | 80358712  | HEXDC (-18477), UTS2R (+25564)              |
| chr6  | 29932142  | 29934362  | ZNRD1 (-95779), HLA-A (+24215)              |
| chr4  | 169550399 | 169560534 | PALLD (+137212), CBR4 (+375942)             |
| chr7  | 106357806 | 106359961 | NAMPT (-433246), PIK3CG (-147040)           |
| chr21 | 43607238  | 43608758  | ABCG1 (-31230), UMODL1 (+116572)            |
| chr6  | 149352499 | 149354659 | TAB2 (-288609), UST (+285115)               |
| chr12 | 51787432  | 51788609  | SLC4A8 (-30534), GALNT6 (-10674)            |
| chr14 | 21249108  | 21250307  | RNASE6 (+498)                               |
| chr1  | 160737529 | 160738338 | LY9 (-28014), SLAMF7 (+28879)               |
| chr22 | 29206942  | 29207724  | ZNRF3 (-72247), XBP1 (-10748)               |
| chr7  | 150146062 | 150150942 | GIMAP8 (+784)                               |
| chr1  | 172326748 | 172330768 | PIGC (+84468), DNM3 (+518137)               |
| chr6  | 166901204 | 166902596 | MPC1 (-105414), RPS6KA2 (+374139)           |
| chr3  | 16353204  | 16354304  | OXNAD1 (+47048), RFTN1 (+201459)            |
| chr12 | 113414246 | 113419249 | OAS2 (+548)                                 |
| chr19 | 10222648  | 10223572  | P2RY11 (+896)                               |
| chr17 | 62704380  | 62705539  | SMURF2 (-46774), LRRC37A3 (+209943)         |
| chr2  | 231523476 | 231525458 | CAB39 (-53093), SP100 (+243486)             |
| chr1  | 27070030  | 27071647  | PIGV (-43847), ARID1A (+48315)              |
| chr5  | 131801662 | 131803042 | IRF1 (+24138), SLC22A5 (+96908)             |
| chr16 | 50314614  | 50316189  | ADCY7 (+14975), BRD7 (+87288)               |
| chr6  | 2857239   | 2859407   | SERPINB1 (-16083), SERPINB9 (+45191)        |

|       |           |           |                                    |
|-------|-----------|-----------|------------------------------------|
| chr20 | 61370631  | 61373226  | MRGBP (-55876), NTSR1 (+31740)     |
| chr20 | 56202272  | 56204589  | ZBP1 (-7902), PMEPA1 (+81527)      |
| chr1  | 205252951 | 205255498 | NUAK2 (+36658), TMCC2 (+56921)     |
| chr6  | 24742423  | 24744319  | GMNN (-31795), C6orf62 (-22307)    |
| chr14 | 69245506  | 69249867  | ZFP36L1 (+12270), RAD51B (+961162) |
| chr1  | 59485073  | 59486675  | FGGY (-276779), JUN (-236089)      |
| chr6  | 152622518 | 152623786 | SYNE1 (+335382), ESR1 (+611521)    |
| chr12 | 113415315 | 113418047 | OAS2 (+481)                        |

**Supplementary Table 1-4. SCC down-regulated H3K27ac peaks and their target genes**

**chrom:** chromosome in hg19

**start:** peak start position in hg19

**end:** peak end position in hg19

**target:** putative target gene(s) from GREAT analysis, gene (distance to the peak)

| SCC-downregulated H3K27ac peaks |           |           |                                          |
|---------------------------------|-----------|-----------|------------------------------------------|
| Chr                             | Start     | End       | Target                                   |
| chr19                           | 708232    | 710793    | PALM (+412)                              |
| chr14                           | 102025515 | 102026611 | DIO3 (-1625)                             |
| chr19                           | 58609118  | 58610487  | ZSCAN18 (+19990), ZNF135 (+39196)        |
| chr5                            | 146614123 | 146614782 | STK32A (-73)                             |
| chr1                            | 61508727  | 61509483  | C1orf87 (-969663), NFIA (-38429)         |
| chr7                            | 1506062   | 1507057   | MICALL2 (-7422), INTS1 (+37443)          |
| chr1                            | 212780243 | 212783293 | ATF3 (-244)                              |
| chr19                           | 707261    | 711910    | PALM (+485)                              |
| chr1                            | 61515633  | 61517522  | C1orf87 (-977136), NFIA (-30956)         |
| chr14                           | 37641219  | 37641987  | SLC25A21 (+468)                          |
| chr9                            | 87282833  | 87287560  | NTRK2 (+1731)                            |
| chr8                            | 12808716  | 12810028  | KIAA1456 (+6186), DLC1 (+563023)         |
| chr6                            | 157557065 | 157558357 | TMEM242 (+186922), ARID1B (+458648)      |
| chr12                           | 131531476 | 131533762 | SFSWAP (-663063), GPR133 (+94167)        |
| chr11                           | 130747932 | 130748433 | SNX19 (+38221), C11orf44 (+205332)       |
| chr19                           | 58608078  | 58610893  | ZSCAN18 (+20307), ZNF135 (+38879)        |
| chr3                            | 173115182 | 173116085 | NLGN1 (-604)                             |
| chr2                            | 191044786 | 191046363 | C2orf88 (-14)                            |
| chr17                           | 15689240  | 15690065  | ADORA2B (-158578), TBC1D26 (+54062)      |
| chrX                            | 47060199  | 47060700  | INE1 (-3870)                             |
| chr16                           | 49872691  | 49873192  | CNEP1R1 (-185379), ZNF423 (-16292)       |
| chr17                           | 41984314  | 41984815  | MPP2 (+548)                              |
| chr20                           | 2672779   | 2673280   | EBF4 (-494)                              |
| chr21                           | 36041566  | 36044059  | CLIC6 (+1125), RUNX1 (+378828)           |
| chr1                            | 65612861  | 65614983  | AK4 (+409)                               |
| chr9                            | 87282403  | 87288187  | NTRK2 (+1829)                            |
| chr14                           | 69726401  | 69729556  | GALNT16 (+1298), ERH (+137365)           |
| chr2                            | 211089455 | 211090133 | ACADL (+421)                             |
| chr10                           | 118501615 | 118502844 | HSPA12A (-145)                           |
| chr17                           | 15689175  | 15690371  | ADORA2B (-158458), TBC1D26 (+54182)      |
| chr22                           | 43114858  | 43117405  | A4GALT (-25140), ARFGAP3 (+137276)       |
| chr1                            | 212777596 | 212783981 | ATF3 (-1223)                             |
| chr10                           | 115999168 | 115999669 | VWA2 (+401)                              |
| chr2                            | 96050796  | 96051423  | FAHD2A (-17364), KCNIP3 (+88058)         |
| chr1                            | 115825638 | 115826139 | TSPAN2 (-193804), NGF (+54968)           |
| chr3                            | 126074972 | 126075985 | KLF15 (+806)                             |
| chr19                           | 6108140   | 6111260   | RFX2 (+845)                              |
| chr14                           | 101999292 | 102002832 | DIO3 (-26626), ENSG00000269375 (+641797) |
| chr5                            | 146613374 | 146615111 | STK32A (-283)                            |
| chr14                           | 37640830  | 37642333  | SLC25A21 (+489)                          |
| chr11                           | 1580088   | 1580589   | MOB2 (-72363), DUSP8 (+12811)            |
| chr2                            | 152954021 | 152955909 | CACNB4 (+628)                            |
| chr9                            | 88419752  | 88421086  | NAA35 (-135642), AGTPBP1 (-63686)        |
| chr14                           | 75742267  | 75746707  | FOS (-990)                               |
| chr11                           | 63258417  | 63258918  | HRASLS5 (-2)                             |
| chr7                            | 116311745 | 116312930 | MET (-121)                               |
| chr3                            | 153838744 | 153840651 | ARHGEF26 (+906)                          |
| chr12                           | 131753109 | 131753610 | SFSWAP (-442322), GPR133 (+314908)       |



|       |           |           |                                     |
|-------|-----------|-----------|-------------------------------------|
| chr10 | 118030073 | 118033924 | GFRA1 (+980)                        |
| chr20 | 43374290  | 43374931  | KCNK15 (+190)                       |
| chr8  | 12808274  | 12810745  | KIAA1456 (+6324), DLC1 (+562885)    |
| chr11 | 65373899  | 65374400  | KCNK7 (-10683), MAP3K11 (+7563)     |
| chr8  | 1921986   | 1922907   | MYOM2 (-70708), ARHGEF10 (+150305)  |
| chr8  | 91996841  | 91998100  | TMEM55A (+55821), NECAB1 (+193693)  |
| chr9  | 34589094  | 34590706  | CNTFR (-165)                        |
| chr2  | 287500    | 290082    | FAM150B (-495)                      |
| chr22 | 46422501  | 46423961  | PPARA (-123268), WNT7B (-50222)     |
| chr7  | 51383596  | 51385111  | COBL (+142)                         |
| chr21 | 33782794  | 33786708  | EVA1C (+62)                         |
| chr17 | 29345     | 31109     | DOC2B (+1200)                       |
| chr10 | 123871601 | 123874849 | PLEKHA1 (-260987), TACC2 (+124516)  |
| chr2  | 237562939 | 237563440 | COPS8 (-430765), ACKR3 (+84906)     |
| chr12 | 54772184  | 54773868  | GPR84 (-14755), ZNF385A (+12056)    |
| chr5  | 63461508  | 63462299  | RNF180 (+195)                       |
| chr20 | 62323261  | 62324016  | TNFRSF6B (-4382)                    |
| chr5  | 1539209   | 1541447   | LPCAT1 (-16236), MRPL36 (+259681)   |
| chr1  | 162517942 | 162519332 | UAP1 (-12686), UHMK1 (+51004)       |
| chr19 | 45970433  | 45973963  | FOSB (+945)                         |
| chr20 | 4021682   | 4022394   | SMOX (-107388), RNF24 (-25822)      |
| chr11 | 69191168  | 69191669  | CCND1 (-264436), TPCN2 (+375054)    |
| chr6  | 89855280  | 89857171  | PM20D2 (+457)                       |
| chr19 | 39833327  | 39834715  | SAMD4B (+913)                       |
| chr21 | 33781776  | 33788316  | EVA1C (+357)                        |
| chr1  | 11846815  | 11852883  | MTHFR (+13453), AGTRAP (+53637)     |
| chr21 | 36040841  | 36044634  | CLIC6 (+1050), RUNX1 (+378903)      |
| chr12 | 52442584  | 52452944  | C12orf44 (-15991), NR4A1 (+31148)   |
| chr19 | 847632    | 849064    | ELANE (-2666)                       |
| chr12 | 54768810  | 54771452  | GPR84 (-11860), ZNF385A (+14951)    |
| chr1  | 2064917   | 2066869   | C1orf86 (+60320), PRKCZ (+83984)    |
| chr16 | 1428687   | 1429726   | GNPTG (+27283), UNKL (+35485)       |
| chr17 | 19482632  | 19483329  | ALDH3A2 (-69083), SLC47A1 (+45814)  |
| chr14 | 104015399 | 104019617 | BAG5 (+11127), TRMT61A (+21987)     |
| chr12 | 52429240  | 52431973  | C12orf44 (-33148), NR4A1 (+13991)   |
| chr9  | 129873203 | 129874722 | ANGPTL2 (+11199), RALGPS1 (+196910) |
| chr12 | 52455865  | 52457011  | C12orf44 (-7317), NR4A1 (+39822)    |
| chr19 | 3374354   | 3376331   | NFIC (+8759), C19orf77 (+105197)    |
| chr14 | 103985731 | 103989036 | CKB (+2064), MARK3 (+135527)        |
| chr22 | 43039289  | 43046166  | CYB5R3 (-2213)                      |
| chr1  | 48462467  | 48463423  | TRABD2B (-378)                      |
| chr3  | 173112820 | 173113756 | NLGN1 (-2950)                       |
| chr12 | 131529378 | 131536009 | SFSWAP (-662988), GPR133 (+94242)   |
| chr8  | 74004677  | 74005906  | SBSPON (+215)                       |
| chr2  | 218843068 | 218844322 | RUFY4 (-90283), TNS1 (-34844)       |
| chr2  | 232467407 | 232471661 | PTMA (-103692), NMUR1 (-74328)      |
| chr1  | 204119856 | 204121760 | ETNK2 (+323)                        |
| chr15 | 76014988  | 76017117  | UBE2Q2 (-119573), CSPG4 (-10864)    |
| chr12 | 52448335  | 52448836  | C12orf44 (-15169), NR4A1 (+31970)   |
| chr17 | 16958353  | 16960384  | MPRIP (+13295), PLD6 (+150260)      |
| chr6  | 89854852  | 89857665  | PM20D2 (+490)                       |
| chr15 | 86315394  | 86316189  | KLHL25 (+22469), AKAP13 (+391832)   |
| chr1  | 61508326  | 61509719  | C1orf87 (-969581), NFIA (-38511)    |
| chr10 | 99160139  | 99161145  | RRP12 (+458)                        |
| chr8  | 81784930  | 81787165  | ZNF704 (+968)                       |
| chr12 | 52443355  | 52445895  | C12orf44 (-19130), NR4A1 (+28009)   |

|       |           |           |                                     |
|-------|-----------|-----------|-------------------------------------|
| chr6  | 119399234 | 119400558 | FAM184A (+12)                       |
| chr21 | 44845738  | 44846842  | SIK1 (+718)                         |
| chr6  | 19836829  | 19839643  | ID4 (+619)                          |
| chr6  | 36964187  | 36967016  | MTCH1 (-11528), FGD2 (-7821)        |
| chr5  | 7802312   | 7802813   | FASTKD3 (+66552), ADCY2 (+406242)   |
| chr12 | 95942143  | 95942785  | USP44 (+2802), METAP2 (+74737)      |
| chr1  | 6347807   | 6349048   | GPR153 (-27393), ACOT7 (+97445)     |
| chr8  | 106329696 | 106332517 | ZFPM2 (+187)                        |
| chr3  | 12328612  | 12330661  | TIMP4 (-128786), PPARG (-63334)     |
| chr19 | 5040794   | 5042035   | KDM4B (+72283), PTPRS (+299399)     |
| chr18 | 24235784  | 24237535  | KCTD1 (-107261), AQP4 (+209122)     |
| chr7  | 100047969 | 100048595 | PPP1R35 (-14094), TSC22D4 (+28620)  |
| chr6  | 157555978 | 157559161 | TMEM242 (+187063), ARID1B (+458507) |
| chr6  | 36964669  | 36967556  | MTCH1 (-12039), FGD2 (-7310)        |
| chr1  | 112532407 | 112535206 | KCND3 (-2030)                       |
| chr9  | 99380084  | 99382622  | CDC14B (+759)                       |
| chr22 | 50340866  | 50351375  | PIM3 (-8040), CRELD2 (+33838)       |
| chr2  | 286811    | 290447    | FAM150B (-333)                      |
| chr6  | 90121169  | 90123074  | RRAGD (-133)                        |
| chr10 | 733628    | 735598    | DIP2C (+993)                        |
| chr5  | 38555807  | 38558012  | LIFR (+38596), EGFLAM (+298399)     |
| chr1  | 196577149 | 196578679 | KCNT2 (-415)                        |
| chr9  | 14345627  | 14353849  | NFIB (-36072), ZDHHC21 (+343731)    |
| chr2  | 71205525  | 71206313  | TEX261 (+16156), ATP6V1B1 (+42907)  |
| chr6  | 32013958  | 32015421  | TNXB (-785)                         |
| chr6  | 56707596  | 56709058  | KIAA1586 (-203020), DST (-200533)   |
| chr12 | 50202188  | 50203847  | BCDIN3D (+33894), TMBIM6 (+67426)   |
| chr8  | 110655343 | 110658195 | SYBU (+47251), EBAG9 (+104363)      |
| chr10 | 13570195  | 13570696  | PRPF18 (-58481), BEND7 (-25470)     |
| chr3  | 184321647 | 184322652 | VPS8 (-207781), EPHB3 (+42578)      |
| chr19 | 41192804  | 41193482  | NUMBL (+3413), LTBP4 (+90002)       |
| chr11 | 108463287 | 108464478 | EXPH5 (+491)                        |
| chr10 | 97173649  | 97174483  | PDLIM1 (-123285), SORBS1 (+147069)  |
| chr17 | 11501842  | 11502343  | DNAH9 (+345)                        |
| chr1  | 204052543 | 204053857 | SOX13 (+10468), ETNK2 (+67931)      |
| chr10 | 115406275 | 115406776 | NRAP (+17360), HABP2 (+93741)       |
| chr18 | 29303731  | 29304605  | B4GALT6 (-39482), SLC25A52 (+36675) |
| chr10 | 11059280  | 11061104  | CEL2F2 (+299)                       |
| chr10 | 11864929  | 11866063  | ECHDC3 (+81131), UPF2 (+212400)     |
| chr6  | 132331969 | 132332792 | CTGF (-59868), MOXD1 (+390303)      |
| chr7  | 45128231  | 45128732  | NACAD (+31)                         |
| chr7  | 30173828  | 30177090  | ZNRF2 (-148464), PLEKHA8 (+107430)  |
| chr9  | 88418882  | 88421755  | NAA35 (-135742), AGTPBP1 (-63586)   |
| chr10 | 123870860 | 123876482 | PLEKHA1 (-260541), TACC2 (+124962)  |
| chr8  | 101524951 | 101525687 | RNF19A (-209832), ANKRD46 (+46651)  |
| chr8  | 106329081 | 106332784 | ZFPM2 (+13)                         |
| chr4  | 5206860   | 5207361   | C4orf6 (-319772), STK32B (+153942)  |
| chr14 | 75389344  | 75389845  | RPS6KL1 (+410)                      |
| chr16 | 30750468  | 30751218  | PHKG2 (-8748), SRCAP (+40381)       |
| chr2  | 121101025 | 121105203 | INHBB (-605)                        |
| chr20 | 48181890  | 48185277  | KCNB1 (-84400), PTGIS (+1099)       |
| chr17 | 47591411  | 47594017  | NXPH3 (-60506), NGFR (+20059)       |
| chr10 | 118500459 | 118503081 | HSPA12A (+315)                      |
| chr1  | 91869664  | 91870691  | HFM1 (+248)                         |
| chr16 | 85469415  | 85471290  | GSE1 (-176469), KIAA0513 (+373535)  |
| chr3  | 126373515 | 126374016 | TXNRD3 (+232)                       |

|       |           |           |                                          |
|-------|-----------|-----------|------------------------------------------|
| chr2  | 238535617 | 238536947 | LRRFIP1 (-64700), RAB17 (-36546)         |
| chr2  | 121100341 | 121106049 | INHBB (-524)                             |
| chr13 | 21277171  | 21278711  | IL17D (+459)                             |
| chr10 | 97175147  | 97175918  | PDLIM1 (-124752), SORBS1 (+145602)       |
| chr6  | 151560760 | 151562650 | AKAP12 (+571)                            |
| chr19 | 40847581  | 40848285  | AKT2 (-56631), PLD3 (-6659)              |
| chr7  | 1505231   | 1509462   | MICALL2 (-8209), INTS1 (+36656)          |
| chr8  | 141642225 | 141646535 | AGO2 (+1338), CHRAC1 (+122983)           |
| chr16 | 85607470  | 85608631  | GSE1 (-38771), KIAA0513 (+511233)        |
| chr2  | 201450081 | 201452608 | AOX1 (+754)                              |
| chr22 | 48885798  | 48886299  | FAM19A5 (+777)                           |
| chr13 | 52342719  | 52345371  | DHRS12 (+34214), WDFY2 (+185401)         |
| chr10 | 118029350 | 118034722 | GFRA1 (+943)                             |
| chr14 | 101997409 | 102003199 | DIO3 (-27384), ENSG00000269375 (+641039) |
| chr2  | 96012713  | 96013214  | FAHD2A (-55510), KCNIP3 (+49912)         |
| chr6  | 32074680  | 32082527  | TNXB (-64699), ATF6B (+17413)            |
| chr6  | 138482418 | 138482919 | KIAA1244 (-389)                          |
| chr11 | 76463179  | 76464525  | LRRC32 (-82808), TSKU (-38944)           |
| chr10 | 92921739  | 92923944  | ANKRD1 (-241809), PCGF5 (-57703)         |
| chr1  | 3432579   | 3434432   | ARHGEF16 (+62516), MEGF6 (+94553)        |
| chr17 | 78044533  | 78045726  | GAA (-30373), CCDC40 (+34695)            |
| chr20 | 33145915  | 33148115  | MAP1LC3A (+12357), PIGU (+117874)        |
| chr19 | 1150582   | 1157092   | SBNO2 (+20445), GPX4 (+49901)            |
| chr19 | 13179352  | 13182337  | LYL1 (+32836), NFIX (+74423)             |
| chr7  | 906116    | 908025    | GET4 (-9118), SUN1 (+34933)              |
| chr2  | 73114504  | 73115005  | SPR (+266)                               |
| chr2  | 85980630  | 85982911  | ATOH8 (+754)                             |
| chr12 | 96183417  | 96185521  | NTN4 (+67)                               |
| chr9  | 71939175  | 71940311  | FAM189A2 (-4498)                         |
| chr19 | 718241    | 719918    | MISP (-32046), PALM (+9979)              |
| chr5  | 179778732 | 179780381 | GFPT2 (+830)                             |
| chr10 | 70319928  | 70321078  | TET1 (+90)                               |
| chr6  | 147829163 | 147829664 | STXBP5 (+303745)                         |
| chr19 | 675163    | 681208    | FSTL3 (+1794), PRSS57 (+17274)           |
| chr3  | 142442721 | 142443862 | TRPC1 (+376)                             |
| chr15 | 68876944  | 68877597  | CORO2B (+5698), ANP32A (+235963)         |
| chr22 | 38378955  | 38380851  | SOX10 (+641)                             |
| chr4  | 186063900 | 186064713 | SLC25A4 (-88)                            |
| chr5  | 137802986 | 137803650 | EGR1 (+2139), ETF1 (+75671)              |
| chr13 | 31479792  | 31482715  | MEDAG (+926)                             |
| chr7  | 28447300  | 28450741  | CREB5 (-3123)                            |
| chr15 | 68870683  | 68872541  | CORO2B (+39)                             |
| chr11 | 130479170 | 130480391 | C11orf44 (-63070), ADAMTS15 (+160912)    |
| chr20 | 48363745  | 48365168  | SLC9A8 (-64793), B4GALT5 (-34042)        |
| chr7  | 79081251  | 79084070  | MAGI2 (+229)                             |
| chr8  | 27849778  | 27850279  | SCARA5 (+215)                            |
| chr17 | 15686072  | 15686573  | ADORA2B (-161908), TBC1D26 (+50732)      |
| chr2  | 211089156 | 211090713 | ACADL (+280)                             |
| chr3  | 48466490  | 48466991  | SPINK8 (-96910), PLXNB1 (+4131)          |
| chr5  | 38554652  | 38558266  | LIFR (+39047), EGFLAM (+297948)          |
| chr21 | 40278330  | 40280018  | ETS2 (+101943), PSMG1 (+276603)          |
| chr2  | 152953496 | 152956570 | CACNB4 (+560)                            |
| chr1  | 26131314  | 26131961  | SEPN1 (+4971), AUNIP (+54265)            |
| chr17 | 7283599   | 7285066   | TNK1 (+177)                              |
| chr18 | 48085850  | 48086351  | MAPK4 (-347)                             |
| chr6  | 32055130  | 32056357  | TNXB (-41839), ATF6B (+40273)            |

|       |           |           |                                     |
|-------|-----------|-----------|-------------------------------------|
| chr8  | 22224522  | 22225891  | SLC39A14 (+445)                     |
| chr22 | 43087468  | 43088774  | CYB5R3 (-47606), A4GALT (+2871)     |
| chr8  | 143781018 | 143782506 | LY6K (+233)                         |
| chr16 | 88119974  | 88124377  | ZNF469 (-371703), BANP (+118552)    |
| chr18 | 20714717  | 20717973  | CABLES1 (+618)                      |
| chr11 | 43963597  | 43965719  | ACCSL (-104873), ALKBH3 (+62269)    |
| chr1  | 65612234  | 65617601  | DNAJC6 (-160310), AK4 (+1405)       |
| chrX  | 102862141 | 102864238 | TCEAL3 (+811)                       |
| chr14 | 94254479  | 94255470  | PRIMA1 (-148)                       |
| chr6  | 17280880  | 17282537  | RBM24 (+132)                        |
| chr8  | 110654581 | 110658793 | SYBU (+47333), EBAG9 (+104281)      |
| chr19 | 3093729   | 3100980   | GNA15 (-38836), GNA11 (+2947)       |
| chr8  | 28226738  | 28227467  | ZNF395 (+16880), PNOC (+52454)      |
| chr19 | 460028    | 460660    | SHC2 (+652)                         |
| chr17 | 36849552  | 36850179  | SRCIN1 (-87683), MLLT6 (-11929)     |
| chr21 | 38352773  | 38353439  | RIPPLY3 (-25757), HLCS (-14333)     |
| chr10 | 3954108   | 3954739   | AKR1E2 (-914022), KLF6 (-126957)    |
| chr19 | 41727677  | 41728358  | HNRNPUL1 (-42218), AXL (+2910)      |
| chr1  | 3418740   | 3419241   | ARHGEF16 (+48001), MEGF6 (+109068)  |
| chr7  | 86688337  | 86688964  | KIAA1324L (+364)                    |
| chr6  | 91004869  | 91007405  | BACH2 (+324)                        |
| chr7  | 30736778  | 30737440  | CRHR2 (+2610), GARS (+102812)       |
| chr2  | 220146395 | 220146896 | DNAJB2 (+2657), PTPRN (+27649)      |
| chr3  | 193987842 | 193992107 | CPN2 (+82082), HES1 (+136041)       |
| chr19 | 5291567   | 5293769   | PTPRS (+48146), KDM4B (+323536)     |
| chr8  | 144952754 | 144953255 | EPPK1 (-373)                        |
| chrX  | 144899771 | 144900272 | SLITRK2 (+333)                      |
| chr12 | 52457643  | 52458841  | C12orf44 (-5513), NR4A1 (+41626)    |
| chr19 | 15890289  | 15890790  | OR10H5 (-14221), OR10H3 (+38337)    |
| chr10 | 45070872  | 45071373  | TMEM72 (-335525), CXCL12 (-190626)  |
| chr14 | 104189371 | 104190717 | ZFYVE21 (+7977), PPP1R13B (+123883) |
| chr18 | 45554194  | 45555102  | SMAD2 (-97136), ZBTB7C (+137289)    |
| chr11 | 8083610   | 8084697   | TUB (+23974), RIC3 (+106382)        |
| chr4  | 186455928 | 186457109 | PDLIM3 (+143)                       |
| chr7  | 103630282 | 103630783 | RELN (-570)                         |
| chrX  | 149530711 | 149535820 | MTM1 (-203803), MAMLD1 (+1580)      |
| chr1  | 184598696 | 184599197 | EDEM3 (+125100), TSEN15 (+578136)   |
| chr7  | 151156952 | 151157986 | RHEB (+59541), NUB1 (+118672)       |
| chr18 | 11688822  | 11690169  | GNAL (+541)                         |
| chr17 | 17600021  | 17600522  | RAI1 (+15485), SREBF1 (+140029)     |
| chr19 | 32619263  | 32619902  | TSHZ3 (-779130), ZNF507 (-216917)   |
| chr1  | 24763901  | 24764928  | RCAN3 (-64972), NIPAL3 (+22131)     |
| chr8  | 145925263 | 145926011 | ARHGAP39 (-94553), ZNF251 (+55353)  |
| chr19 | 717795    | 721768    | MISP (-31344), PALM (+10681)        |
| chr9  | 139948447 | 139950467 | ENTPD2 (-960)                       |
| chr19 | 16507662  | 16513215  | EPS15L1 (+72384), KLF2 (+74811)     |
| chr19 | 7293189   | 7295096   | INSR (-98)                          |
| chr10 | 18429840  | 18430341  | CACNB2 (+485)                       |
| chr2  | 120063360 | 120064727 | DBI (-60785), STEAP3 (+82637)       |
| chr19 | 33685790  | 33686447  | LRP3 (+629)                         |
| chr12 | 122070725 | 122071385 | TMEM120B (-79646), ORA1 (+6600)     |
| chr6  | 151646703 | 151647204 | ZBTB2 (+65729), AKAP12 (+85820)     |
| chr10 | 99477337  | 99478405  | ZFYVE27 (-20363), MARVELD1 (+4390)  |
| chr6  | 149210545 | 149211046 | TAB2 (-431392), UST (+142332)       |
| chr2  | 236578080 | 236580610 | AGAP1 (+176594), GBX2 (+497667)     |
| chr6  | 90119790  | 90123329  | RRAGD (+429)                        |

|       |           |           |                                       |
|-------|-----------|-----------|---------------------------------------|
| chr19 | 3027727   | 3029223   | TLE2 (+690)                           |
| chr3  | 76359571  | 76361644  | ROBO2 (+404762)                       |
| chr17 | 9141971   | 9145717   | NTN1 (+218985), STX8 (+335709)        |
| chr22 | 23597826  | 23600640  | BCR (+76836), IGLL1 (+323262)         |
| chr22 | 41763175  | 41764974  | TEF (-13858), ZC3H7B (+66549)         |
| chr1  | 47271382  | 47273540  | CYP4B1 (+7743), CYP4A11 (+134676)     |
| chr1  | 112531399 | 112535481 | KCND3 (-1663)                         |
| chr15 | 100881777 | 100882278 | ADAMTS17 (+182)                       |
| chr17 | 19204903  | 19205530  | B9D1 (+60809), EPN2 (+64563)          |
| chr11 | 63530324  | 63530825  | MARK2 (-75825), RTN3 (+81620)         |
| chr3  | 180587633 | 180588468 | CCDC39 (-190763), FXR1 (-42039)       |
| chr9  | 33349757  | 33350258  | AQP7 (+52509), NFX1 (+59499)          |
| chr11 | 125034838 | 125035497 | PKNOX2 (+566)                         |
| chr7  | 130969153 | 130971115 | KLF14 (-551246), MKLN1 (-42485)       |
| chr17 | 36618585  | 36627032  | ARHGAP23 (+38147), SRCIN1 (+139374)   |
| chr15 | 57668286  | 57670338  | CGNL1 (+609)                          |
| chr6  | 19836295  | 19841485  | ID4 (+1273), MBOAT1 (+373740)         |
| chr16 | 71756732  | 71758108  | PHLPP2 (+1184), MARVELD3 (+97330)     |
| chr4  | 139903378 | 139904013 | SLC7A11 (-740193), CCRN4L (-33247)    |
| chr19 | 13186243  | 13191224  | LYL1 (+24947), NFIX (+82312)          |
| chr16 | 2517626   | 2518641   | NTN3 (-3366)                          |
| chr16 | 70714166  | 70716712  | MTSS1L (+4530), IL34 (+101641)        |
| chr11 | 68080112  | 68082868  | PPP6R3 (-146748), LRP5 (+1413)        |
| chr14 | 76454769  | 76455270  | GPATCH2L (-163259), IFT43 (+2895)     |
| chr11 | 121611635 | 121613335 | SORL1 (+289573), BLID (+374438)       |
| chr9  | 35563613  | 35564114  | TESK1 (-41503), RUSC2 (+25235)        |
| chr9  | 22447265  | 22447959  | DMRTA1 (+772)                         |
| chrX  | 101967285 | 101968337 | GPRASP2 (+554)                        |
| chr1  | 10700568  | 10701627  | CASZ1 (+155607), PEX14 (+166154)      |
| chr13 | 31478893  | 31483707  | MEDAG (+972)                          |
| chr9  | 14339803  | 14354451  | NFIB (-33461), ZDHHC21 (+346342)      |
| chr1  | 37920257  | 37921500  | GRIK3 (-421153), ZC3H12A (-19274)     |
| chr14 | 69725918  | 69732625  | GALNT16 (+2591), ERH (+136072)        |
| chr12 | 95941403  | 95943242  | USP44 (+2943), METAP2 (+74596)        |
| chr15 | 62360449  | 62361078  | C2CD4A (+1588), C2CD4B (+96718)       |
| chrX  | 150863626 | 150864127 | PRRG3 (-2902)                         |
| chr19 | 46050565  | 46051448  | OPA3 (+37093), VASP (+40333)          |
| chr8  | 141639397 | 141641296 | AGO2 (+5371), CHRAC1 (+118950)        |
| chr19 | 3047034   | 3048326   | TLE2 (-18515), AES (+15425)           |
| chr2  | 241930261 | 241939352 | SNED1 (-3448)                         |
| chr22 | 24447475  | 24448989  | SUSD2 (-128995), CABIN1 (+40364)      |
| chr4  | 24913208  | 24915188  | SOD3 (+117113), LGI2 (+118303)        |
| chr2  | 241855368 | 241858770 | ENSG00000226321 (-4917)               |
| chr8  | 98289554  | 98290181  | TSPYL5 (+308)                         |
| chr2  | 191043735 | 191048814 | C2orf88 (+686)                        |
| chr12 | 33049296  | 33050250  | PKP2 (-83)                            |
| chr7  | 30179322  | 30179823  | ZNRF2 (-144350), PLEKHA8 (+111544)    |
| chr19 | 3535995   | 3538018   | FZR1 (+14019), MFSD12 (+20394)        |
| chrX  | 149530465 | 149536120 | MTM1 (-203776), MAMLD1 (+1607)        |
| chr8  | 144904579 | 144907031 | SCRIB (-8256), PUF60 (+6224)          |
| chr8  | 17657165  | 17661197  | MTUS1 (-1004)                         |
| chr11 | 130476305 | 130477000 | C11orf44 (-66198), ADAMTS15 (+157784) |
| chr10 | 115998781 | 116000661 | VWA2 (+703)                           |
| chr15 | 91175794  | 91176295  | BLM (-84513), CRT3 (+102745)          |
| chr6  | 170495008 | 170495642 | DLL1 (+104236), C6orf70 (+343604)     |
| chr22 | 43111929  | 43117933  | A4GALT (-23939), ARFGAP3 (+138477)    |

|       |           |           |                                          |
|-------|-----------|-----------|------------------------------------------|
| chr2  | 63286686  | 63287325  | OTX1 (+9069), WDPCP (+528927)            |
| chr16 | 49892348  | 49893749  | CNEP1R1 (-165272), ZNF423 (-36399)       |
| chr7  | 56183709  | 56184210  | CHCHD2 (-9691)                           |
| chr2  | 241929239 | 241929740 | SNED1 (-8765), ENSG00000226321 (+67504)  |
| chr17 | 81064325  | 81065313  | METRNL (+27252)                          |
| chr8  | 145115188 | 145116389 | OPLAH (-205)                             |
| chr13 | 113597279 | 113598337 | MCF2L (-25727), ATP11A (+253165)         |
| chr12 | 53460102  | 53460603  | IGFBP6 (-30876), TENC1 (+17620)          |
| chr22 | 38377512  | 38378013  | SOX10 (+2781), POLR2F (+28093)           |
| chr16 | 19179346  | 19180176  | SYT17 (+190)                             |
| chr8  | 27795049  | 27795550  | PBK (-99688), SCARA5 (+54944)            |
| chr10 | 119296254 | 119297928 | EMX2 (-4864)                             |
| chr6  | 32049262  | 32050772  | TNXB (-36112), ATF6B (+46000)            |
| chr19 | 5288180   | 5294551   | PTPRS (+49448), KDM4B (+322234)          |
| chr18 | 11688809  | 11690508  | GNAL (+704)                              |
| chr16 | 90015512  | 90016013  | DEF8 (+580)                              |
| chr2  | 43258847  | 43260971  | HAO (-240177), ZFP36L2 (+193839)         |
| chr16 | 85469118  | 85471765  | GSE1 (-176380), KIAA0513 (+373624)       |
| chr5  | 2739110   | 2741457   | IRX4 (-852952), IRX2 (+11492)            |
| chr12 | 120662325 | 120664173 | RPLP0 (-24347), PXN (+40314)             |
| chr1  | 61514262  | 61524636  | C1orf87 (-980007), NFIA (-28085)         |
| chr7  | 95401660  | 95402480  | DYNC1I1 (+168)                           |
| chr11 | 67133862  | 67134803  | POLD4 (-13316), CLCF1 (+6875)            |
| chr5  | 3602277   | 3602778   | IRX1 (+6360)                             |
| chr5  | 38448708  | 38449336  | LIFR (+146484), EGFLAM (+190511)         |
| chr1  | 247274400 | 247275651 | ZNF669 (-7352), ZNF124 (+60292)          |
| chr11 | 68167306  | 68167807  | PPP6R3 (-60681), LRP5 (+87480)           |
| chr10 | 79631179  | 79634225  | KCNMA1 (-235302), DLG5 (+53582)          |
| chr9  | 130712127 | 130713567 | DPM2 (-12084), NAIF1 (+116753)           |
| chr12 | 52424888  | 52441653  | C12orf44 (-30484), NR4A1 (+16655)        |
| chr1  | 48461015  | 48463728  | TRABD2B (+195)                           |
| chr14 | 67999476  | 68000805  | PLEKHH1 (+123)                           |
| chr17 | 77924929  | 77925430  | CBX4 (-111952), TBC1D16 (+84467)         |
| chr11 | 121611260 | 121614301 | SORL1 (+289869), BLID (+374142)          |
| chr2  | 42274329  | 42279172  | EML4 (-119739), PKDCC (+1591)            |
| chr17 | 75859763  | 75861799  | TNRC6C (-140356), SEPT9 (+583289)        |
| chr1  | 221785500 | 221786001 | DUSP10 (+129767), HLX (+734052)          |
| chrX  | 84499180  | 84499681  | ZNF711 (+393)                            |
| chr18 | 24235204  | 24237921  | KCTD1 (-107164), AQP4 (+209219)          |
| chr5  | 171862874 | 171865462 | UBTD2 (-153093), SH3PXD2B (+17359)       |
| chr19 | 3055217   | 3058250   | TLE2 (-27569), AES (+6371)               |
| chr11 | 107985590 | 107986397 | ACAT1 (-6249), CUL5 (+106535)            |
| chr15 | 45477537  | 45480871  | SHF (+14169), DUOX1 (+57073)             |
| chr11 | 125820339 | 125820840 | DDX25 (+46332), CDON (+112597)           |
| chr11 | 34035439  | 34036071  | LMO2 (-121919), CAPRIN1 (-37475)         |
| chr15 | 64338150  | 64338651  | DAPK2 (-5935), FAM96A (+47816)           |
| chr2  | 241926191 | 241928420 | SNED1 (-10949), ENSG00000226321 (+65320) |
| chr1  | 41846177  | 41849194  | FOXO6 (+20092), EDN2 (+102656)           |
| chr7  | 140062454 | 140062955 | JHDM1D (-185870), SLC37A3 (+35644)       |
| chr6  | 33595793  | 33596294  | ITPR3 (+7902), MNF1 (+83460)             |
| chr8  | 1920934   | 1923428   | MYOM2 (-70974), ARHGEF10 (+150039)       |
| chr6  | 119416858 | 119417359 | FAM184A (-17201), MAN1A1 (+253817)       |
| chr10 | 733346    | 737090    | DIP2C (+388)                             |
| chr1  | 17899686  | 17900366  | ACTL8 (-181782), ARHGEF10L (+33696)      |
| chr17 | 19482165  | 19484146  | ALDH3A2 (-68908), SLC47A1 (+45989)       |
| chr17 | 53342369  | 53344411  | HLF (+1017), MMD (+155963)               |

|       |           |           |                                       |
|-------|-----------|-----------|---------------------------------------|
| chr11 | 8039715   | 8041984   | TUB (-19330), EIF3F (+49052)          |
| chr16 | 90113606  | 90114107  | URAHP (+324)                          |
| chr17 | 80061211  | 80062905  | SLC16A3 (-129505), FASN (-5850)       |
| chr16 | 15489396  | 15490447  | MPV17L (+286), ENSG00000261130 (+311) |
| chr17 | 2273206   | 2273707   | MNT (+30955), SGSM2 (+32651)          |
| chr13 | 114739968 | 114741357 | GAS6 (-173623), RASA3 (+157423)       |
| chr14 | 104005072 | 104005573 | TRMT61A (+9802), BAG5 (+23312)        |
| chr22 | 29602042  | 29602713  | EMID1 (+538)                          |
| chr2  | 27665104  | 27665989  | KRTCAP3 (+314)                        |
| chr16 | 49862462  | 49863099  | CNEP1R1 (-195540), ZNF423 (-6131)     |
| chr19 | 1143546   | 1158955   | SBNO2 (+23031), GPX4 (+47315)         |
| chr10 | 115802950 | 115803581 | ADRB1 (-540)                          |
| chr14 | 104047912 | 104048413 | KLC1 (-47415), APOPT1 (+18864)        |
| chr21 | 33822617  | 33824514  | EVA1C (+38877), TCP10L (+134277)      |
| chr3  | 126710902 | 126711403 | PLXNA1 (+3716), TPRA1 (+598459)       |
| chr1  | 20810483  | 20814050  | CAMK2N1 (+446)                        |
| chr17 | 36897960  | 36899099  | PCGF2 (+7540), CISD3 (+12042)         |
| chr6  | 151560464 | 151562857 | AKAP12 (+527)                         |
| chr12 | 131437907 | 131440096 | GPR133 (+550)                         |
| chr9  | 71939266  | 71941455  | FAM189A2 (-3880)                      |
| chr21 | 44807037  | 44807538  | SIK1 (+39720), CRYAA (+218170)        |
| chr22 | 43033018  | 43033519  | POLDIP3 (-22301), ATP5L2 (+3338)      |
| chr16 | 1427070   | 1430762   | GNPTG (+26992), UNKL (+35776)         |
| chr12 | 124888181 | 124888878 | NCOR2 (+91268), ZNF664 (+430860)      |
| chr3  | 153838317 | 153842051 | ARHGGEF26 (+1392), DHX36 (+202102)    |
| chr9  | 99378377  | 99382672  | CDC14B (+1587), HABP4 (+168038)       |
| chr3  | 142442546 | 142444484 | TRPC1 (+599)                          |
| chr5  | 63460770  | 63462708  | RNF180 (+30)                          |
| chr16 | 2879714   | 2880681   | ZG16B (+28)                           |
| chr19 | 55622470  | 55626452  | PPP1R12C (+4466), EPS8L1 (+37192)     |
| chr12 | 96182589  | 96185883  | NTN4 (+300)                           |
| chrX  | 152965678 | 152966179 | SLC6A8 (+12375), BCAP31 (+23620)      |
| chr1  | 960036    | 961065    | AGRN (+5048), RNF223 (+49136)         |
| chr21 | 45344960  | 45345461  | AGPAT3 (+322)                         |
| chr19 | 1239164   | 1240992   | C19orf26 (-2052), ATP5D (-1671)       |
| chr12 | 123627264 | 123628636 | PITPNM2 (-32975), MPHOSPH9 (+78491)   |
| chr5  | 3594519   | 3599759   | IRX1 (+971)                           |
| chr19 | 15891478  | 15891979  | OR10H5 (-13032), OR10H3 (+39526)      |
| chr8  | 27559055  | 27561227  | ESCO2 (-71762), SCARA3 (+68443)       |
| chr1  | 7765390   | 7765891   | VAMP3 (-65688), CAMTA1 (+920257)      |
| chr16 | 67334984  | 67336200  | PLEKHG4 (+24179), KCTD19 (+25074)     |
| chr17 | 56012634  | 56013957  | MRPS23 (-85879), VEZF1 (+52217)       |
| chr16 | 56664812  | 56668095  | MT1M (+309)                           |
| chr1  | 27740769  | 27741270  | GPR3 (+21872), WASF2 (+75649)         |
| chr3  | 12837511  | 12839162  | CAND2 (+158)                          |
| chr16 | 56665559  | 56667315  | MT1M (+292)                           |
| chr8  | 74004016  | 74006259  | SBSPON (+369)                         |
| chr4  | 186130418 | 186132001 | SNX25 (+5819), LRP2BP (+168942)       |
| chr9  | 129851205 | 129853258 | ANGPTL2 (+32930), RALGPS1 (+175179)   |
| chr2  | 945843    | 947213    | SNTG2 (-26)                           |
| chr9  | 101727948 | 101728449 | TGFBR1 (-139172), COL15A1 (+22278)    |
| chr2  | 27717406  | 27718632  | GCKR (-1690), FNDC4 (+93)             |
| chr19 | 3092948   | 3101962   | GNA15 (-38736), GNA11 (+3047)         |
| chr1  | 91869242  | 91870919  | HFM1 (+345)                           |
| chr10 | 114765168 | 114765669 | HABP2 (-547366), TCF7L2 (+55410)      |
| chr2  | 239229059 | 239229967 | TRAF3IP1 (+431)                       |

|       |           |           |                                      |
|-------|-----------|-----------|--------------------------------------|
| chr20 | 44977636  | 44979074  | CDH22 (-98021), SLC35C2 (+13458)     |
| chr1  | 202100242 | 202102782 | GPR37L1 (+9526), ARL8A (+12357)      |
| chr12 | 86105294  | 86105975  | RASSF9 (+124713), ALX1 (+431750)     |
| chr1  | 196576714 | 196579600 | KCNT2 (-658)                         |
| chr13 | 45953874  | 45954549  | TPT1 (-38707), SLC25A30 (+38303)     |
| chr3  | 140834938 | 140835439 | ACPL2 (-115481), SPSB4 (+64945)      |
| chr2  | 10594224  | 10594725  | ODC1 (-5845), NOL10 (+235618)        |
| chr1  | 27912786  | 27913287  | WASF2 (-96368), AHDC1 (+17106)       |
| chr4  | 186455587 | 186457803 | PDLIM3 (-33)                         |
| chr6  | 32038249  | 32038750  | TNXB (-24595), ATF6B (+57517)        |
| chr22 | 17082081  | 17083761  | CCT8L2 (-9221), XKR3 (+219668)       |
| chr18 | 5628491   | 5629159   | EPB41L3 (-84584), TMEM200C (+267129) |
| chr19 | 46032028  | 46032529  | VASP (+21605), OPA3 (+55821)         |
| chr20 | 13201102  | 13203138  | ISM1 (-298)                          |
| chr13 | 78492228  | 78494270  | EDNRB (+654)                         |
| chr3  | 186665797 | 186666559 | ST6GAL1 (+17904), RPL39L (+191133)   |
| chr3  | 57197984  | 57199112  | IL17RD (+855)                        |
| chrX  | 99986622  | 99987123  | SYTL4 (-351)                         |
| chr9  | 137230827 | 137231654 | COL5A1 (-302379), RXRA (+12815)      |
| chr17 | 21260651  | 21261152  | KCNJ12 (-18607), MAP2K3 (+72918)     |
| chr1  | 15239479  | 15241088  | TMEM51 (-238744), KAZN (+315084)     |
| chr16 | 67977598  | 67979257  | LCAT (-394)                          |
| chr1  | 6351266   | 6352674   | GPR153 (-30935), ACOT7 (+93903)      |
| chr17 | 80693052  | 80694245  | FN3K (+198)                          |
| chr4  | 152579808 | 152580465 | PET112 (+102038), PRSS48 (+381814)   |
| chr2  | 56150173  | 56151037  | EFEMP1 (+669)                        |
| chr17 | 25866907  | 25868761  | LGALS9 (-88990), KSR1 (+68798)       |
| chr12 | 52453043  | 52459500  | C12orf44 (-7483), NR4A1 (+39656)     |
| chr20 | 13976021  | 13976731  | MACROD2 (+361)                       |
| chr13 | 113644555 | 113653438 | F7 (-111124), MCF2L (+25462)         |
| chr17 | 56401777  | 56402551  | MPO (-43868), BZRAP1 (+3281)         |
| chr1  | 228335945 | 228339572 | GJC2 (+206)                          |
| chr14 | 55150146  | 55154358  | SAMD4A (+117617), GCH1 (+217318)     |
| chr1  | 30663301  | 30664372  | MATN1 (+532597)                      |
| chr12 | 100377905 | 100379231 | ANKS1B (-553)                        |
| chr5  | 38465607  | 38469717  | LIFR (+127844), EGFLAM (+209151)     |
| chr5  | 115152160 | 115153037 | CDO1 (+52)                           |
| chr17 | 77015877  | 77017307  | C1QTNF1 (-3661)                      |
| chr6  | 168840932 | 168842991 | SMOC2 (+131)                         |
| chr19 | 21769046  | 21769547  | ZNF429 (+80931), ZNF100 (+181133)    |
| chr10 | 11911759  | 11912487  | ECHDC3 (+127758), UPF2 (+165773)     |
| chr19 | 16504666  | 16518313  | EPS15L1 (+71333), KLF2 (+75862)      |
| chr7  | 36405924  | 36407637  | ANLN (-22634), EEPD1 (+214023)       |
| chr14 | 102022374 | 102027010 | DIO3 (-2996)                         |
| chr5  | 179778332 | 179781518 | GFPT2 (+462)                         |
| chr17 | 78932683  | 78934287  | CHMP6 (-32156), RPTOR (+414417)      |
| chr7  | 4921314   | 4923354   | PAPOLB (-20709), RADIL (+1016)       |
| chr1  | 10745676  | 10746520  | CASZ1 (+110607), PEX14 (+211154)     |
| chr1  | 57110638  | 57111948  | PRKAA2 (+298)                        |
| chr13 | 45955192  | 45956595  | TPT1 (-40389), SLC25A30 (+36621)     |
| chr22 | 43304137  | 43304638  | ARFGAP3 (-50980), PACSIN2 (+106763)  |
| chr6  | 16239176  | 16240336  | GMPR (+945)                          |
| chr10 | 95753646  | 95754147  | PLCE1 (+151)                         |
| chr22 | 38643018  | 38643519  | TMEM184B (+25771), MAFF (+45380)     |
| chr8  | 81784605  | 81788779  | ZNF704 (+324)                        |
| chr2  | 9532475   | 9533588   | ITGB1BP1 (+30326), ASAP2 (+186138)   |



|       |           |           |                                          |
|-------|-----------|-----------|------------------------------------------|
| chr1  | 61519137  | 61520656  | C1orf87 (-980455), NFIA (-27637)         |
| chr7  | 28995158  | 28996600  | CHN2 (-238149), CREB5 (+543735)          |
| chr6  | 84743679  | 84744180  | MRAP2 (+455)                             |
| chr20 | 48202887  | 48203388  | PTGIS (-18455), B4GALT5 (+127277)        |
| chr15 | 40803501  | 40804311  | RPUSD2 (-57593), CHST14 (+40746)         |
| chr18 | 29264321  | 29265936  | B4GALT6 (-443)                           |
| chr2  | 241924734 | 241942409 | SNED1 (-4683)                            |
| chr1  | 10057336  | 10058283  | RBP7 (+536)                              |
| chr17 | 47590277  | 47594701  | NXPH3 (-60731), NGFR (+19834)            |
| chr22 | 38494792  | 38495293  | SLC16A8 (-15894), BAIAP2L2 (+11634)      |
| chr6  | 7172976   | 7174056   | RREB1 (+65475), SSR1 (+139924)           |
| chr8  | 22084936  | 22085784  | POLR3D (-17388), BMP1 (+63111)           |
| chrX  | 118107966 | 118111119 | LONRF3 (+830)                            |
| chrX  | 101967070 | 101968763 | GPRASP2 (+660)                           |
| chr9  | 119424504 | 119426005 | PAPPA-AS1 (-262370), TRIM32 (-24326)     |
| chr11 | 68452161  | 68452662  | GAL (+469)                               |
| chr2  | 241907682 | 241908352 | SNED1 (-30238), ENSG00000226321 (+46031) |
| chr12 | 131404347 | 131406170 | GPR133 (-33193), RAN (+48835)            |
| chr16 | 33293899  | 33294656  | TP53TG3B (+32763)                        |
| chr7  | 74291048  | 74291549  | GTF2IRD2 (-23452), WBSCR16 (+198330)     |
| chr13 | 52342267  | 52347312  | DHRS12 (+33469), WDFY2 (+186146)         |
| chr14 | 75384063  | 75384898  | RPS6KL1 (+5524), DLST (+35885)           |
| chr1  | 2063504   | 2068696   | C1orf86 (+60113), PRKCZ (+84191)         |
| chr8  | 38613841  | 38615540  | FGFR1 (-289328), TACC1 (-30031)          |
| chr17 | 8577867   | 8578368   | MYH10 (-44039), MFSD6L (+124549)         |
| chr5  | 153380754 | 153381255 | FAM114A2 (+37474), GRIA1 (+509273)       |
| chr22 | 34535561  | 34536062  | ISX (-926317), LARGE (-219403)           |
| chr1  | 17252057  | 17252823  | CROCC (+3995), MFAP2 (+54890)            |
| chr5  | 7394101   | 7397388   | ADCY2 (-576)                             |
| chr1  | 14925527  | 14926028  | KAZN (+578)                              |
| chr9  | 91148766  | 91149555  | C9orf47 (-456682), SPIN1 (+145827)       |
| chr21 | 42688382  | 42688883  | FAM3B (-28)                              |
| chr18 | 48085530  | 48087629  | MAPK4 (+132)                             |
| chr1  | 17302762  | 17303263  | MFAP2 (+4317), CROCC (+54568)            |
| chr19 | 41105701  | 41106337  | LTBP4 (+2878), NUMBL (+90537)            |
| chr3  | 126073282 | 126076990 | ALDH1L1 (-175107), KLF15 (+1149)         |
| chr19 | 3027333   | 3029965   | TLE2 (+516)                              |
| chr8  | 27559148  | 27561227  | ESCO2 (-71715), SCARA3 (+68490)          |
| chr9  | 130707757 | 130708501 | DPM2 (-7366), NAIF1 (+121471)            |
| chr6  | 11213561  | 11215297  | ERVFRD-1 (-102464), NEDD9 (+18486)       |
| chr12 | 52450031  | 52450532  | C12orf44 (-13473), NR4A1 (+33666)        |
| chr11 | 62688248  | 62689432  | CHRM1 (+313)                             |
| chr1  | 162524452 | 162524953 | UAP1 (-6620), UHMK1 (+57070)             |
| chr17 | 19244980  | 19246059  | B9D1 (+20506), EPN2 (+104866)            |
| chr12 | 124852879 | 124856661 | NCOR2 (+125028), ZNF664 (+397100)        |
| chr1  | 20809838  | 20814028  | CAMK2N1 (+780)                           |
| chr17 | 19174027  | 19174528  | EPN2 (+33624), B9D1 (+91748)             |
| chr5  | 80530555  | 80531056  | ZCCHC9 (-66616), CKMT2 (+1663)           |
| chr7  | 30595851  | 30596690  | GGCT (-51811), GARS (-38026)             |
| chr2  | 242503649 | 242504150 | BOK (+5764), THAP4 (+72964)              |
| chr8  | 145725947 | 145730000 | GPT (-1491)                              |
| chr17 | 19216139  | 19216640  | B9D1 (+49636), EPN2 (+75736)             |
| chr9  | 34588858  | 34595043  | CNTFR (-2216)                            |
| chr2  | 85359895  | 85362927  | TCF7L1 (+878)                            |
| chr7  | 51381641  | 51385971  | COBL (+690)                              |
| chr15 | 70381112  | 70381613  | TLE3 (+9152), RPLP1 (+636240)            |

|       |           |           |                                     |
|-------|-----------|-----------|-------------------------------------|
| chr2  | 237795340 | 237795841 | COPS8 (-198364), ACKR3 (+317307)    |
| chr12 | 13043725  | 13045387  | GPRC5A (+840)                       |
| chr9  | 123656388 | 123657506 | PHF19 (-17341), TRAF1 (+34100)      |
| chr8  | 17354477  | 17356857  | MTMR7 (-84831), SLC7A2 (-40619)     |
| chr1  | 3454836   | 3457474   | MEGF6 (+71904), ARHGEF16 (+85165)   |
| chr16 | 2171265   | 2173482   | NTHL1 (-74507), PKD1 (+13525)       |
| chr14 | 92350380  | 92352806  | TC2N (-17720), FBLN5 (+62574)       |
| chr3  | 173112510 | 173117496 | NLGN1 (-1235)                       |
| chr22 | 23597410  | 23601555  | BCR (+77086), IGLL1 (+323012)       |
| chr18 | 29303331  | 29305041  | B4GALT6 (-39500), SLC25A52 (+36657) |
| chr17 | 75859128  | 75863055  | TNRC6C (-140045), SEPT9 (+583600)   |
| chr10 | 353421    | 354123    | ZMYND11 (+173348), DIP2C (+381834)  |
| chr2  | 217850623 | 217851907 | TNP1 (-126478), TNS1 (+957586)      |
| chr5  | 106930097 | 106930598 | EFNA5 (+76248)                      |
| chr4  | 164264588 | 164265806 | NPY5R (-57)                         |
| chr8  | 81610219  | 81610846  | ZNF704 (+176483), ZBTB10 (+212631)  |
| chr9  | 71962067  | 71962568  | FAM189A2 (+18077), APBA1 (+324904)  |
| chr21 | 45348046  | 45350086  | TRAPP10 (-83134), AGPAT3 (+4177)    |
| chr7  | 95178449  | 95180817  | PDK4 (+46170), ASB4 (+64420)        |
| chr9  | 131390263 | 131391482 | WDR34 (+28193), SPTAN1 (+76004)     |
| chr3  | 123167187 | 123169187 | ADCY5 (+418)                        |
| chr13 | 103051808 | 103053452 | FGF14 (+1494), ITGEB1 (+947664)     |
| chr17 | 81062300  | 81063287  | METRNL (+25227)                     |
| chr1  | 203447972 | 203448655 | OPTC (-14957), PRELP (+3358)        |
| chr7  | 228178    | 232590    | FAM20C (+37415), PDGFA (+328647)    |
| chr11 | 19585619  | 19586705  | E2F8 (-322995), NAV2 (-148981)      |
| chr5  | 172328719 | 172329753 | RPL26L1 (-56660), ERGIC1 (+67958)   |
| chr17 | 53342118  | 53345641  | HLF (+1507), MMD (+155473)          |
| chr4  | 187065989 | 187066939 | CYP4V2 (-46210), TLR3 (+76158)      |
| chr8  | 145117633 | 145119478 | OPLAH (-2972)                       |
| chr6  | 32013633  | 32019002  | TNXB (-2413)                        |
| chr19 | 5308471   | 5309385   | PTPRS (+31886), KDM4B (+339796)     |
| chr1  | 14924483  | 14926274  | KAZN (+179)                         |
| chr2  | 240628705 | 240629422 | HDAC4 (-306421), NDUFA10 (+335755)  |
| chr1  | 33733821  | 33735645  | ZNF362 (+12559), A3GALT2 (+51966)   |
| chr10 | 79625144  | 79625645  | KCNMA1 (-227995), DLG5 (+60889)     |
| chr15 | 99498734  | 99499235  | PGPEP1L (+49806), IGF1R (+306785)   |
| chr1  | 47214740  | 47218317  | CYP4B1 (-48189), EFCAB14 (-31793)   |
| chr19 | 15889922  | 15892320  | OR10H5 (-13640), OR10H3 (+38918)    |
| chr7  | 4920948   | 4923706   | PAPOLB (-20702), RADIL (+1023)      |
| chr14 | 92365557  | 92366058  | TC2N (-31935), FBLN5 (+48359)       |
| chr15 | 83315921  | 83316981  | CPEB1 (+277)                        |
| chr3  | 126546805 | 126547525 | PLXNA1 (-160272), CHCHD6 (+124102)  |
| chr17 | 70111477  | 70116580  | SOX9 (-3132)                        |
| chr19 | 18769025  | 18771899  | CRTC1 (-24026), TMEM59L (+52222)    |
| chr5  | 784311    | 785497    | ZDHHC11B (-17837), ZDHHC11 (+66197) |
| chr5  | 92956646  | 92957508  | NR2F1 (+38034), POU5F2 (+120266)    |
| chr12 | 122116829 | 122117478 | TMEM120B (-33547), ORAI1 (+52699)   |
| chr7  | 95401422  | 95402696  | DYNC1I1 (+157)                      |
| chr1  | 41845046  | 41849571  | FOXO6 (+19715), EDN2 (+103033)      |
| chr7  | 4742259   | 4743342   | AP5Z1 (-72452), FOXK1 (+20861)      |
| chr10 | 134227374 | 134227875 | INPP5A (-123699), STK32C (-106181)  |
| chr6  | 17280381  | 17283087  | RBM24 (+157)                        |
| chr11 | 77733478  | 77734639  | KCTD14 (+281)                       |
| chrX  | 83442012  | 83443689  | RPS6KA6 (+64)                       |
| chr8  | 144951172 | 144951824 | NRBP2 (-28352), EPPK1 (+1134)       |

|       |           |           |                                       |
|-------|-----------|-----------|---------------------------------------|
| chr13 | 110874012 | 110874641 | IRS2 (-435412), COL4A1 (+85169)       |
| chr1  | 26351293  | 26351794  | EXTL1 (+3273), SLC30A2 (+21080)       |
| chr16 | 85406576  | 85407077  | GSE1 (-239995), KIAA0513 (+310009)    |
| chr18 | 5628058   | 5631063   | EPB41L3 (-85320), TMEM200C (+266393)  |
| chr2  | 23608752  | 23609253  | ATAD2B (+540981)                      |
| chr14 | 105933388 | 105935682 | CRIP2 (-4764)                         |
| chr1  | 232315729 | 232316419 | SIPA1L2 (+381230), DISC1 (+553513)    |
| chr13 | 44792622  | 44794031  | SERP2 (-154651), SMIM2 (-57934)       |
| chr19 | 5059809   | 5060310   | KDM4B (+90928), PTPRS (+280754)       |
| chr14 | 69753617  | 69754118  | GALNT16 (+27187), ERH (+111476)       |
| chr5  | 81152957  | 81153753  | ATG10 (-114489), SSBP2 (-106283)      |
| chr5  | 38416363  | 38417700  | EGFLAM (+158521), LIFR (+178474)      |
| chr1  | 179555353 | 179555989 | NPHS2 (-10603), TDRD5 (-5354)         |
| chr1  | 10726299  | 10726800  | CASZ1 (+130155), PEX14 (+191606)      |
| chr10 | 126840151 | 126842098 | C10orf137 (-567020), CTBP2 (-124666)  |
| chr1  | 3112597   | 3113098   | ARHGEF16 (-258142), PRDM16 (+127073)  |
| chr7  | 74290739  | 74291526  | GTF2IRD2 (-23286), WBSCR16 (+198496)  |
| chr1  | 234952782 | 234953919 | IRF2BP2 (-208080), TOMM20 (+338900)   |
| chr3  | 52480145  | 52480646  | SEMA3G (-1353)                        |
| chr22 | 17081603  | 17084719  | CCT8L2 (-9461), XKR3 (+219428)        |
| chr6  | 160461889 | 160462390 | SLC22A1 (-80681), IGF2R (+72009)      |
| chr6  | 138482186 | 138484314 | KIAA1244 (+192)                       |
| chr22 | 23545738  | 23547660  | BCR (+24302), IGLL1 (+375796)         |
| chr6  | 35036313  | 35036814  | TCP11 (+72860), ANKS1A (+179522)      |
| chr15 | 76013001  | 76018102  | UBE2Q2 (-120074), CSPG4 (-10363)      |
| chr1  | 156441737 | 156442238 | C1orf61 (-42804), MEF2D (+28632)      |
| chr5  | 131700303 | 131700804 | SLC22A5 (-4890)                       |
| chr18 | 42323129  | 42323630  | SLC14A2 (-871386), SETBP1 (+62517)    |
| chr9  | 133719832 | 133720333 | QRFP (+49142), ABL1 (+130750)         |
| chr9  | 34591215  | 34591927  | CNTFR (-1836)                         |
| chr2  | 689829    | 690606    | SNTG2 (-256336), TMEM18 (-12779)      |
| chr12 | 52437394  | 52440451  | C12orf44 (-24832), NR4A1 (+22307)     |
| chr17 | 19301077  | 19301826  | RNF112 (-13055), MFAP4 (-10949)       |
| chr8  | 125677523 | 125678024 | MTSS1 (+62896), NDUFB9 (+126430)      |
| chr7  | 73300420  | 73301817  | ELN (-141000), WBSCR28 (+25630)       |
| chr20 | 32281450  | 32282132  | E2F1 (-7581), PXMP4 (+26315)          |
| chr5  | 3593108   | 3607363   | IRX1 (+4068)                          |
| chr11 | 130477546 | 130478369 | C11orf44 (-64893), ADAMTS15 (+159089) |
| chr10 | 7708309   | 7710064   | ITIH5 (-253)                          |
| chr11 | 63256526  | 63259263  | HRASLS5 (+771)                        |
| chr5  | 56749404  | 56749905  | ACTBL2 (+28981), GPBP1 (+239707)      |
| chr13 | 112101341 | 112104424 | SOX1 (-619030), TEX29 (+129868)       |
| chr9  | 35790401  | 35792331  | NPR2 (-785)                           |
| chr1  | 10797539  | 10798870  | CASZ1 (+58500), PEX14 (+263261)       |
| chr13 | 114739885 | 114741503 | GAS6 (-173654), RASA3 (+157392)       |
| chr10 | 126687459 | 126691678 | CTBP2 (+26890), ZRANB1 (+58877)       |
| chr1  | 47213693  | 47218713  | CYP4B1 (-48515), EFCAB14 (-31467)     |
| chr1  | 57109593  | 57112088  | PRKAA2 (-154)                         |
| chr8  | 37671437  | 37673887  | GPR124 (+17888), BRF2 (+34760)        |
| chr15 | 76469361  | 76472169  | C15orf27 (+118587), ETFA (+133045)    |
| chr10 | 47653660  | 47654161  | ANTXRL (-4323)                        |
| chr9  | 98810746  | 98811390  | ERCC6L2 (+173085), HSD17B3 (+253366)  |
| chr15 | 65378176  | 65381377  | KBTBD13 (+10623), PDCD7 (+46397)      |
| chr12 | 11859843  | 11860478  | BCL2L14 (-363712), ETV6 (+57373)      |
| chr15 | 67485996  | 67486784  | AAGAB (+60684), SMAD3 (+128207)       |
| chr11 | 11170124  | 11170625  | ZBED5 (-290755), CSNK2A3 (+204529)    |

|       |           |           |                                    |
|-------|-----------|-----------|------------------------------------|
| chr21 | 22370442  | 22370943  | NCAM2 (+60)                        |
| chr3  | 53879216  | 53880574  | IL17RB (-712), CHDH (+522)         |
| chr3  | 50306407  | 50306908  | LSMEM2 (-9800), GNAI2 (+33274)     |
| chr4  | 82135532  | 82136621  | PRKG2 (+111)                       |
| chr9  | 100263737 | 100265421 | TMOD1 (+1117), TSTD2 (+131278)     |
| chr17 | 2315793   | 2316498   | MNT (-11734), METTL16 (+99034)     |
| chr20 | 56014764  | 56017019  | RBM38 (+49429), CTCFL (+84271)     |
| chr5  | 1131391   | 1131892   | SLC6A19 (-70068), SLC12A7 (-19492) |
| chr17 | 1952859   | 1954482   | HIC1 (-5933), OVCA2 (+8344)        |
| chr7  | 905560    | 910306    | GET4 (-8256), SUN1 (+35795)        |
| chr1  | 47220843  | 47221344  | CYP4B1 (-43624), EFCAB14 (-36358)  |
| chr13 | 113597234 | 113598753 | MCF2L (-25541), ATP11A (+253351)   |
| chr21 | 45356335  | 45357419  | TRAPP10 (-75323), AGPAT3 (+11988)  |
| chr12 | 54767503  | 54768205  | GPR84 (-9583), ZNF385A (+17228)    |
| chr11 | 43962658  | 43967439  | ACCSL (-104482), ALKBH3 (+62660)   |
| chr17 | 16924568  | 16925556  | TNFRSF13B (-49660), MPRIP (-21012) |
| chr19 | 8458145   | 8460387   | MARCH2 (-24023), RAB11B (+4183)    |
| chr15 | 68901731  | 68902232  | CORO2B (+30409), ANP32A (+211252)  |
| chr1  | 201463193 | 201466300 | PHLDA3 (-26435), CSRP1 (+13837)    |
| chr2  | 85388468  | 85388969  | TCF7L1 (+28186), TGOLN2 (+166428)  |
| chr13 | 25024959  | 25025460  | PARP4 (+61738), C1QTNF9 (+143906)  |
| chr22 | 38374675  | 38385210  | SOX10 (+601)                       |
| chr6  | 11755629  | 11756415  | ADTRP (+23014), TMEM170B (+217511) |
| chr14 | 105400007 | 105400508 | PLD4 (+9098), AHNAK2 (+44436)      |
| chr2  | 171571668 | 171572499 | SP5 (+223)                         |
| chr22 | 19946720  | 19947435  | TXNRD2 (-17745), ARVCF (+57253)    |
| chr2  | 236341736 | 236342653 | AGAP1 (-60556), SH3BP4 (+454866)   |
| chr20 | 43372255  | 43375469  | KCNK15 (-559)                      |
| chr16 | 33293753  | 33294962  | TP53TG3B (+32843)                  |
| chr11 | 121975944 | 121976729 | BLID (+10586), SORL1 (+653425)     |
| chr11 | 114127642 | 114129766 | NNMT (+151)                        |
| chr18 | 20713483  | 20718973  | CABLES1 (+501)                     |
| chr1  | 228562955 | 228563456 | TRIM11 (+31335), OBSCN (+167375)   |
| chr10 | 43446319  | 43449123  | RET (-124754), BMS1 (+169472)      |
| chr19 | 32616501  | 32617149  | TSHZ3 (-776372), ZNF507 (-219675)  |
| chr2  | 121301887 | 121302388 | GLI2 (-247847), INHBB (+198419)    |
| chr19 | 4742691   | 4743372   | FEM1A (-48696), DPP9 (-19157)      |
| chr17 | 2288412   | 2289089   | MNT (+15661), SGSM2 (+47945)       |
| chr17 | 40715798  | 40716862  | MLX (-2760)                        |
| chr19 | 13149277  | 13151936  | NFIX (+44185), LYL1 (+63074)       |
| chr2  | 171627157 | 171627658 | GAD1 (-45664), SP5 (+55547)        |
| chr10 | 134277453 | 134279360 | STK32C (-156963), INPP5A (-72917)  |
| chr2  | 42272784  | 42282277  | EML4 (-118959), PKDCC (+2371)      |
| chr1  | 46654044  | 46654545  | LURAP1 (-14711), TSPAN1 (+13536)   |
| chr13 | 35516038  | 35517206  | NBEA (+198)                        |
| chr11 | 126062231 | 126062732 | CDON (-129295), RPU5D4 (+19105)    |
| chr7  | 84814663  | 84816438  | SEMA3D (-64300)                    |
| chr10 | 119309867 | 119310505 | EMX2 (+8231), RAB11FIP2 (+495928)  |
| chr6  | 89870987  | 89871488  | PM20D2 (+15469), GABRR1 (+55914)   |
| chr2  | 85359338  | 85365070  | TCF7L1 (+1671), TGOLN2 (+192943)   |
| chr20 | 44455027  | 44456201  | TNNC2 (+366)                       |
| chr9  | 14343368  | 14345095  | NFIB (-30566), ZDHHC21 (+349237)   |
| chr9  | 140131308 | 140132543 | TUBB4B (-3739)                     |
| chr1  | 204051245 | 204051883 | SOX13 (+8832), ETNK2 (+69567)      |
| chr17 | 16961583  | 16962084  | MPRIP (+15760), PLD6 (+147795)     |
| chr8  | 134501120 | 134501788 | NDRG1 (-191625), ST3GAL1 (+82729)  |

|       |           |           |                                          |
|-------|-----------|-----------|------------------------------------------|
| chr1  | 6346934   | 6353066   | GPR153 (-28965), ACOT7 (+95873)          |
| chr3  | 42884189  | 42889451  | CYP8B1 (+30813), ACKR2 (+35852)          |
| chr1  | 115725969 | 115726641 | TSPAN2 (-94220), NGF (+154552)           |
| chr20 | 44098932  | 44099742  | WFDC2 (+991)                             |
| chr11 | 126253175 | 126254724 | ST3GAL4 (-21727), DCPS (+80303)          |
| chr14 | 22806466  | 22807519  | DAD1 (+251182), OR4E2 (+673696)          |
| chr22 | 48884450  | 48888653  | FAM19A5 (+1280)                          |
| chr20 | 48502914  | 48505047  | SPATA2 (+26295), SLC9A8 (+74731)         |
| chr12 | 124880861 | 124882229 | NCOR2 (+98253), ZNF664 (+423875)         |
| chr11 | 30605847  | 30608713  | MPPED2 (-5237), DCDC1 (+784041)          |
| chr13 | 102067873 | 102068890 | NALCN (+324)                             |
| chr19 | 459331    | 462710    | SHC2 (-25)                               |
| chr7  | 86688055  | 86689889  | KIAA1324L (+43)                          |
| chr3  | 194014408 | 194015380 | CPN2 (+57163), HES1 (+160960)            |
| chr8  | 12966650  | 12967611  | KIAA1456 (+163945), DLC1 (+405264)       |
| chr17 | 47653233  | 47654921  | NXP3 (+857)                              |
| chr2  | 242837997 | 242838937 | CXXC11 (+26586)                          |
| chr19 | 52227494  | 52228415  | HAS1 (-734)                              |
| chr1  | 92032667  | 92038008  | CDC7 (+68673), TGFBR3 (+316449)          |
| chr13 | 113703203 | 113704013 | F7 (-56513), MCF2L (+80073)              |
| chr16 | 57316997  | 57319163  | PLL2 (+519)                              |
| chr1  | 202098327 | 202104669 | GPR37L1 (+9512), ARL8A (+12371)          |
| chr7  | 45127318  | 45129453  | NACAD (+127)                             |
| chr14 | 94254423  | 94256403  | PRIMA1 (-586)                            |
| chr19 | 5915791   | 5916550   | CAPS (+1924), RANBP3 (+61980)            |
| chr14 | 101984201 | 101988252 | DIO3 (-41461), ENSG00000269375 (+626962) |
| chr16 | 29213860  | 29214520  | NPIP11 (+201160), LAT (+218043)          |
| chr1  | 12608371  | 12610652  | DHRS3 (+68225), TNFRSF1B (+382452)       |
| chr7  | 63505842  | 63506480  | ZNF727 (+340)                            |
| chr6  | 32073664  | 32088022  | TNXB (-66938), ATF6B (+15174)            |
| chr6  | 46458053  | 46459963  | RCAN2 (+91)                              |
| chr9  | 129860781 | 129861553 | ANGPTL2 (+23995), RALGPS1 (+184114)      |
| chr19 | 50650737  | 50651704  | VRK3 (-122018), IZUMO2 (+15231)          |
| chr2  | 23746833  | 23747474  | ATAD2B (+402830)                         |
| chr11 | 3148729   | 3149230   | CARS (-70313), OSBPL5 (+37604)           |
| chr17 | 53665273  | 53665774  | MMD (-166171), TMEM100 (+143958)         |
| chr3  | 184310383 | 184311475 | VPS8 (-219002), EPHB3 (+31357)           |
| chr12 | 50201577  | 50205433  | BCDIN3D (+33407), TM6SF2 (+67913)        |
| chrX  | 118107714 | 118111323 | LONRF3 (+806)                            |
| chr7  | 28444655  | 28451552  | CREB5 (-4040)                            |
| chr6  | 32046660  | 32057508  | TNXB (-38179), ATF6B (+43933)            |
| chr9  | 119417617 | 119418289 | PAPPA-AS1 (-255068), TRIM32 (-31628)     |
| chr22 | 32021568  | 32022971  | PISD (+1937), SFI1 (+129721)             |
| chr17 | 42195634  | 42196135  | HDAC5 (+5121), G6PC3 (+47782)            |
| chr7  | 30957792  | 30958702  | GHRHR (-45391), AQP1 (+6777)             |
| chr1  | 44009504  | 44010005  | KDM4A (-106074), PTPRF (+13208)          |
| chr7  | 130126000 | 130126879 | CEP41 (-45362), MEST (-5494)             |
| chr9  | 136149964 | 136151563 | OBP2B (-66136), SURF6 (+52471)           |
| chr2  | 23607308  | 23610307  | ATAD2B (+541176)                         |
| chr5  | 168418534 | 168419035 | PANK3 (-412180), SLIT3 (+309348)         |
| chr2  | 217858352 | 217858853 | TNP1 (-133816), TNS1 (+950248)           |
| chr10 | 97166785  | 97169945  | PDLIM1 (-117584), SORBS1 (+152770)       |
| chr7  | 79080904  | 79089412  | MAGI2 (-2268)                            |
| chr1  | 11854536  | 11855037  | MTHFR (+8515), AGTRAP (+58575)           |
| chr17 | 28040     | 32637     | DOC2B (+1088)                            |
| chr1  | 54755730  | 54756744  | C1orf191 (+52527), SSBP3 (+115855)       |

|       |           |           |                                        |
|-------|-----------|-----------|----------------------------------------|
| chrX  | 144898799 | 144900597 | SLITRK2 (+9)                           |
| chr19 | 47108362  | 47109288  | PPP5D1 (-4368), CALM3 (+4332)          |
| chr18 | 29263996  | 29266220  | B4GALT6 (-422)                         |
| chr1  | 17901456  | 17902914  | ACTL8 (-179623), ARHGEF10L (+35855)    |
| chr1  | 120279311 | 120280848 | PHGDH (+25570), HMGCS2 (+31437)        |
| chr15 | 68881731  | 68882695  | CORO2B (+10640), ANP32A (+231021)      |
| chr1  | 12613318  | 12614124  | DHRS3 (+64016), TNFRSF1B (+386661)     |
| chr10 | 24703309  | 24705964  | KIAA1217 (+206544), ARHGAP21 (+307960) |
| chr1  | 201461026 | 201461800 | PHLDA3 (-23101), CSRP1 (+17171)        |
| chr4  | 2257171   | 2259544   | HAUS3 (-14498), MXD4 (+5663)           |
| chr19 | 11009181  | 11010486  | CARM1 (+27645), YIPF2 (+29495)         |
| chr7  | 225883    | 232568    | FAM20C (+36257), PDGFA (+329805)       |
| chr9  | 72658517  | 72659809  | MAMDC2 (+666)                          |
| chr3  | 112947239 | 112948098 | BOC (+17340), SPICE1 (+286334)         |
| chr15 | 39764508  | 39766224  | RASGRP1 (-908359), THBS1 (-107928)     |
| chr3  | 127795786 | 127796643 | SEC61A1 (+25003), RUVBL1 (+46452)      |
| chr1  | 17857774  | 17860415  | RCC2 (-92875), ARHGEF10L (-7235)       |
| chr7  | 158861515 | 158862016 | VIPR2 (+75883), WDR60 (+212497)        |
| chr4  | 8248921   | 8249837   | HTRA3 (-22113), SH3TC1 (+48285)        |
| chr22 | 34315404  | 34316548  | LARGE (+433)                           |
| chr1  | 55446218  | 55446884  | TMEM61 (+86)                           |
| chr1  | 10699638  | 10702031  | CASZ1 (+155870), PEX14 (+165891)       |
| chr6  | 11216167  | 11216668  | ERVFRD-1 (-104453), NEDD9 (+16497)     |
| chr11 | 30606650  | 30608529  | MPPED2 (-5547), DCDC1 (+783731)        |
| chr8  | 125590904 | 125591405 | NDUFB9 (+39811), MTSS1 (+149515)       |
| chr19 | 33555347  | 33555848  | RHPN2 (+196)                           |
| chr1  | 48175338  | 48175839  | FOXD2 (+273900), TRABD2B (+286978)     |
| chr1  | 47973964  | 47974866  | FOXD2 (+72726), TRABD2B (+488152)      |
| chr1  | 156443671 | 156448222 | C1orf61 (-46763), MEF2D (+24673)       |
| chr20 | 48196400  | 48197100  | PTGIS (-12067), B4GALT5 (+133665)      |
| chr19 | 13177134  | 13178816  | LYL1 (+35706), NFIX (+71553)           |
| chr6  | 152127899 | 152130915 | ESR1 (+117776), SYNE1 (+829127)        |
| chr3  | 57196790  | 57199564  | ARHGEF3 (-84841), IL17RD (+1226)       |
| chr17 | 71345239  | 71346553  | CDC42EP4 (-37582), SDK2 (+294332)      |
| chr13 | 102068039 | 102069541 | NALCN (-84)                            |
| chr15 | 99497298  | 99497938  | PGPEP1L (+51173), IGF1R (+305418)      |
| chr22 | 41813652  | 41814984  | TOB2 (+28709), TEF (+36385)            |
| chr13 | 21283324  | 21284704  | IL17D (+6532), N6AMT2 (+64074)         |
| chr3  | 134369383 | 134370024 | KY (+160)                              |
| chr2  | 9538136   | 9540694   | ITGB1BP1 (+23943), ASAP2 (+192521)     |
| chr17 | 75734340  | 75735253  | TNRC6C (-266340), SEPT9 (+457305)      |
| chr11 | 64602883  | 64603952  | MEN1 (-24652), CDC42BPG (+8623)        |
| chr19 | 21504574  | 21505936  | ZNF708 (+6957), ZNF431 (+180412)       |
| chr5  | 672518    | 673185    | TPPP (+20658), CEP72 (+60465)          |
| chr6  | 43639227  | 43640070  | MRPS18A (+15879), RSPH9 (+26866)       |
| chr22 | 22288133  | 22288634  | MAPK1 (-66465), PPM1F (+18825)         |
| chr17 | 1927673   | 1929300   | DPH1 (-4917), RTN4RL1 (-309)           |
| chr10 | 97237088  | 97240919  | PDLIM1 (-188223), SORBS1 (+82131)      |
| chr2  | 217858091 | 217859991 | TNP1 (-134254), TNS1 (+949810)         |
| chr3  | 142607249 | 142608617 | PCOLCE2 (+112)                         |
| chr21 | 44861034  | 44861535  | SIK1 (-14277), HSF2BP (+218089)        |
| chr2  | 239199611 | 239201050 | PER2 (-3081)                           |
| chr22 | 38619115  | 38619979  | MAFF (+21658), TMEM184B (+49493)       |
| chr1  | 3431092   | 3436779   | ARHGEF16 (+62946), MEGF6 (+94123)      |
| chr14 | 101019560 | 101021545 | WARS (-177411), BEGAIN (+13854)        |
| chr3  | 52877422  | 52877923  | MUSTN1 (-8438), TMEM110 (+53939)       |

|       |           |           |                                      |
|-------|-----------|-----------|--------------------------------------|
| chr1  | 95582599  | 95583254  | ENSG00000271092 (-552), TMEM56 (+33) |
| chr4  | 152581031 | 152581532 | PET112 (+100893), PRSS48 (+382959)   |
| chr16 | 84967192  | 84968247  | ZDHHC7 (+77388), CRISPLD2 (+114130)  |
| chr16 | 74356713  | 74357545  | NPIP15 (-54647), PSMD7 (+26456)      |
| chr2  | 11622352  | 11623633  | GREB1 (-51249), E2F6 (-16718)        |
| chr6  | 110677465 | 110680872 | METTL24 (+306)                       |
| chr17 | 70109168  | 70122028  | SOX9 (-1563)                         |
| chr3  | 190580362 | 190581201 | GMNC (-378)                          |
| chr9  | 139534896 | 139535705 | NOTCH1 (-94987), EGFL7 (-18007)      |
| chr14 | 103668487 | 103668988 | EIF5 (-131601), TNFAIP2 (+78940)     |
| chr17 | 80692562  | 80695019  | FN3K (+340)                          |
| chr3  | 184314537 | 184320898 | VPS8 (-212213), EPHB3 (+38146)       |
| chr1  | 204117877 | 204122254 | ETNK2 (+1065), SOX13 (+77334)        |
| chr2  | 237561495 | 237564049 | COPS8 (-431183), ACKR3 (+84488)      |
| chr11 | 124054090 | 124054591 | OR10D3 (-1582)                       |
| chr9  | 110257409 | 110257910 | KLF4 (-5733)                         |
| chr10 | 28966419  | 28967746  | BAMBI (+812)                         |
| chr1  | 228132873 | 228133374 | WNT9A (+2475), PRSS38 (+129730)      |
| chr3  | 180587271 | 180588714 | CCDC39 (-190705), FXR1 (-42097)      |
| chr20 | 2106102   | 2108054   | TGM3 (-169569), STK35 (+24821)       |
| chr14 | 27326624  | 27327125  | NOVA1 (-259915)                      |
| chr1  | 217262668 | 217263533 | ESRRG (-366306), GPATCH2 (+541323)   |
| chr8  | 17639119  | 17639759  | MTUS1 (+18738), PDGFRL (+205497)     |
| chr5  | 105024024 | 105024525 | NONE                                 |
| chr4  | 9002325   | 9003245   | FAM90A26 (-169350), HMX1 (-129242)   |
| chr19 | 22805593  | 22806094  | ZNF98 (-200696), ZNF492 (-11282)     |
| chr14 | 55143042  | 55144690  | SAMD4A (+109231), GCH1 (+225704)     |
| chr11 | 66682405  | 66683338  | PC (+42975), LRFN4 (+57899)          |
| chr17 | 41004118  | 41004853  | G6PC (-48329), AOC3 (+1285)          |
| chr12 | 48178439  | 48181586  | SLC48A1 (+13022), HDAC7 (+33555)     |
| chr8  | 1112844   | 1114537   | TDRP (-617910), DLGAP2 (-335841)     |
| chr18 | 35157191  | 35158361  | CELFA4 (-11776)                      |
| chr14 | 25517654  | 25519761  | STXBP6 (+795)                        |
| chr3  | 196757719 | 196758220 | MF12 (-1283)                         |
| chr17 | 17729670  | 17730171  | SREBF1 (+10380), RAI1 (+145134)      |
| chr19 | 5127573   | 5129265   | KDM4B (+159287), PTPRS (+212395)     |
| chr17 | 2898744   | 2900476   | OR1D5 (+67291), RAP1GAP2 (+199878)   |
| chr15 | 35014229  | 35015107  | GOLGA8B (-138897), GJD2 (+32498)     |
| chr10 | 118515384 | 118516028 | ENO4 (-93317), HSPA12A (-13621)      |
| chr1  | 65990694  | 65994094  | PDE4B (-265803), LEPR (+106059)      |
| chr3  | 13635808  | 13636309  | FBLN2 (+45428), WNT7A (+285559)      |
| chr1  | 109137859 | 109138360 | HENMT1 (+66038), NBPFF6 (+219689)    |
| chr22 | 50735042  | 50735838  | MAPK11 (-26618), PLXNB2 (+10616)     |
| chr3  | 184294812 | 184297525 | VPS8 (-233762), EPHB3 (+16597)       |
| chr13 | 99112007  | 99112508  | RNF113B (-282739), STK24 (+61994)    |
| chr2  | 201450076 | 201455972 | BZW1 (-224055), AOX1 (+2433)         |
| chr17 | 80109777  | 80111624  | SLC16A3 (-80862), FASN (-54493)      |
| chr8  | 145925041 | 145926269 | ARHGAP39 (-94571), ZNF251 (+55335)   |
| chr1  | 62534177  | 62534678  | KANK4 (+250657), INADL (+326279)     |
| chr8  | 63160421  | 63162618  | NKAIN3 (+19)                         |
| chr14 | 75389062  | 75390243  | RPS6KL1 (+352)                       |
| chr9  | 137174403 | 137175304 | RXRA (-43572), WDR5 (+173644)        |
| chr1  | 54736601  | 54748854  | C1orf191 (+39018), SSBP3 (+129364)   |
| chr17 | 80421587  | 80422088  | FOXK2 (-55753), NARF (+5356)         |
| chr17 | 37367954  | 37369209  | RPL19 (+12046), STAC2 (+13543)       |
| chr2  | 43223759  | 43229533  | HAAO (-206914), ZFP36L2 (+227102)    |

|       |           |           |                                        |
|-------|-----------|-----------|----------------------------------------|
| chr2  | 171626504 | 171628537 | GAD1 (-45551), SP5 (+55660)            |
| chr21 | 32902953  | 32903454  | KRTAP19-8 (-492409), TIAM1 (+28086)    |
| chr10 | 121125798 | 121126299 | GRK5 (+158948), RGS10 (+176171)        |
| chr17 | 79058753  | 79059752  | BAIAP2 (+50291), AATK (+80564)         |
| chr17 | 73701417  | 73701918  | RECQL5 (-38399), ITGB4 (-15848)        |
| chr7  | 151156227 | 151159883 | RHEB (+58955), NUB1 (+119258)          |
| chr11 | 1568027   | 1568528   | MOB2 (-60302), DUSP8 (+24872)          |
| chr5  | 168431430 | 168431931 | PANK3 (-425076), SLIT3 (+296452)       |
| chr3  | 12975995  | 12976687  | RPL32 (-93254), IQSEC1 (+32827)        |
| chr9  | 140094115 | 140094616 | TPRN (+884)                            |
| chr5  | 38809192  | 38810934  | LIFR (-214557), OSMR (-36038)          |
| chr10 | 95192880  | 95193381  | MYOF (+48820), CYP26A1 (+359484)       |
| chr9  | 129866110 | 129867267 | ANGPTL2 (+18473), RALGPS1 (+189636)    |
| chr9  | 136149759 | 136151737 | OBP2B (-66120), SURF6 (+52487)         |
| chr2  | 121309913 | 121310414 | GLI2 (-239821), INHBB (+206445)        |
| chr17 | 73809300  | 73809990  | UNK (+28793), UNC13D (+31153)          |
| chr7  | 98665107  | 98665608  | SMURF1 (+76365), TRRAP (+189245)       |
| chr3  | 125931893 | 125932541 | ALDH1L1 (-32188), KLF15 (+144068)      |
| chr9  | 137307049 | 137307550 | COL5A1 (-226320), RXRA (+88874)        |
| chr19 | 8048076   | 8048885   | TIMM44 (-39676), ELAVL1 (+22011)       |
| chr4  | 164264419 | 164266041 | NPY5R (-24)                            |
| chr19 | 21768801  | 21770265  | ZNF429 (+81167), ZNF100 (+180897)      |
| chr2  | 120129201 | 120129702 | TMEM37 (-59993), DBI (+4623)           |
| chr15 | 89452624  | 89453125  | HAPLN3 (-14018), MFGE8 (+3767)         |
| chr1  | 12606227  | 12611125  | DHRS3 (+69061), TNFRSF1B (+381616)     |
| chr2  | 945387    | 947592    | SNTG2 (-64)                            |
| chr10 | 88739444  | 88740980  | ADIRF (+12263), GLUD1 (+114411)        |
| chr1  | 228131970 | 228136931 | WNT9A (+1148), PRSS38 (+131057)        |
| chr1  | 56052305  | 56053037  | USP24 (-371885), PPAP2B (+992570)      |
| chr12 | 108440287 | 108440964 | WSCD2 (-84902), ASCL4 (+272464)        |
| chr12 | 131750626 | 131754108 | SFSWAP (-443315), GPR133 (+313915)     |
| chr2  | 100937245 | 100939207 | LONRF2 (+969)                          |
| chr4  | 187064893 | 187067663 | CYP4V2 (-46396), TLR3 (+75972)         |
| chr12 | 110774927 | 110775428 | ATP2A2 (+55692), ANAPC7 (+66357)       |
| chr10 | 24702862  | 24706720  | KIAA1217 (+206698), ARHGAP21 (+307806) |
| chr6  | 50816890  | 50818656  | TFAP2B (+31337)                        |
| chr19 | 46806460  | 46807401  | PPP5C (-43320), HIF3A (+6628)          |
| chr3  | 193999979 | 194001502 | CPN2 (+71316), HES1 (+146807)          |
| chr1  | 203476727 | 203478101 | ATP2B4 (-118275), OPTC (+14143)        |
| chr20 | 48201013  | 48202093  | PTGIS (-16870), B4GALT5 (+128862)      |
| chr7  | 151380308 | 151381465 | RHEB (-163877), PRKAG2 (+193323)       |
| chr4  | 103932792 | 103933450 | SLC9B1 (+7775), CISD2 (+142986)        |
| chr6  | 3381748   | 3382249   | TUBB2B (-154030), SLC22A23 (+74794)    |
| chr14 | 68541656  | 68542476  | RAD51B (+255541), ZFP36L1 (+717891)    |
| chr16 | 15489239  | 15490802  | MPV17L (+385), ENSG00000261130 (+410)  |
| chr12 | 100377605 | 100379524 | ANKS1B (-550)                          |
| chr2  | 31462009  | 31462705  | EHD3 (+5154), XDH (+175224)            |
| chr19 | 11079487  | 11079988  | LDLR (-120300), SMARCA4 (+8061)        |
| chr8  | 97674857  | 97675595  | CPQ (+17771), TSPYL5 (+614950)         |
| chr14 | 104003522 | 104004223 | TRMT61A (+8352), BAG5 (+24762)         |
| chr6  | 37647918  | 37649480  | CCDC167 (-181001), MDGA1 (+17067)      |
| chr7  | 100063171 | 100065331 | PPP1R35 (-30063), TSC22D4 (+12651)     |
| chr12 | 117797998 | 117799602 | NOS1 (-29921), KSR2 (+607988)          |
| chr3  | 187896817 | 187897318 | BCL6 (-433553), LPP (-33653)           |
| chr22 | 49049820  | 49050321  | FAM19A5 (+164799)                      |
| chr9  | 35793917  | 35794418  | NPR2 (+2017), SPAG8 (+18101)           |



|       |           |           |                                     |
|-------|-----------|-----------|-------------------------------------|
| chr3  | 195962625 | 195963311 | SLC51A (+19593), PCYT1A (+51616)    |
| chr11 | 67983575  | 67984208  | SUV420H1 (-3010)                    |
| chr20 | 48601720  | 48602406  | SNAI1 (+2527), UBE2V1 (+130428)     |
| chr11 | 61672869  | 61692774  | FADS3 (-23816), RAB3IL1 (+2175)     |
| chr6  | 41394601  | 41398578  | FOXP4 (-117574), NCR2 (+93063)      |
| chr17 | 15685923  | 15686815  | ADORA2B (-161862), TBC1D26 (+50778) |
| chr8  | 145114728 | 145119690 | OPLAH (-1625)                       |
| chr1  | 182175986 | 182176712 | ZNF648 (-145502), GLUL (+184992)    |
| chr21 | 42878544  | 42880645  | TMPRSS2 (+397)                      |
| chr20 | 1312321   | 1313228   | SDCBP2 (-2892)                      |
| chr11 | 113929401 | 113932677 | ZBTB16 (+724)                       |
| chr22 | 38393897  | 38394398  | PICK1 (-59059), SOX10 (-13604)      |
| chr18 | 31157547  | 31158404  | ASXL3 (-620)                        |
| chrX  | 17878406  | 17878907  | RAI2 (+800)                         |
| chr12 | 54170106  | 54170607  | HOXC13 (-162178), CALCOCO1 (-49133) |
| chr5  | 3590647   | 3592243   | IRX1 (-4723)                        |
| chr17 | 21111660  | 21112846  | TMEM11 (+5684), DHRS7B (+82288)     |
| chr12 | 52314595  | 52315096  | ACVR1B (-30639), ACVRL1 (+13644)    |
| chr3  | 3841260   | 3842732   | LRRN1 (+875)                        |
| chr1  | 14467082  | 14467726  | KAZN (-457796), PRDM2 (+436054)     |
| chr16 | 88118559  | 88128314  | ZNF469 (-370442), BANP (+119813)    |
| chr6  | 44029478  | 44032312  | TMEM63B (-63756), VEGFA (+292451)   |
| chr2  | 87641583  | 87642467  | PLGLB2 (-405581), PLGLB1 (-393050)  |
| chr4  | 54751682  | 54752630  | LNX1 (-294373), CHIC2 (+178701)     |
| chr5  | 159474579 | 159475080 | TTC1 (+38710), PWWP2A (+71600)      |
| chr2  | 238499140 | 238500416 | RAB17 (-42)                         |
| chr9  | 100319532 | 100320033 | TMOD1 (+56321), TSTD2 (+76074)      |
| chr3  | 194941972 | 194943048 | LSG1 (-549304), XXYLT1 (+49386)     |
| chr1  | 21594830  | 21595825  | EIF4G3 (-91985), ECE1 (+21654)      |
| chr19 | 17435101  | 17435730  | ANO8 (+10222), MRPL34 (+18939)      |
| chr3  | 9903805   | 9904911   | RPUSD3 (-18658), CIDEC (+15837)     |
| chr5  | 131712229 | 131712730 | SLC22A5 (+7036), IRF1 (+114010)     |
| chr14 | 104187568 | 104188069 | ZFYVE21 (+5752), PPP1R13B (+126108) |
| chr11 | 61682451  | 61682952  | FADS3 (-23696), RAB3IL1 (+2295)     |
| chr3  | 45062474  | 45062975  | CLEC3B (-4950)                      |
| chr1  | 47073442  | 47073943  | MKNK1 (-3807)                       |
| chr3  | 193921739 | 193922402 | HES1 (+68137), CPN2 (+149986)       |
| chr14 | 23615131  | 23615950  | CEBPE (-26716), SLC7A8 (+37308)     |
| chr9  | 38004170  | 38004839  | SLC25A51 (-100398), SHB (+64703)    |
| chr3  | 123166061 | 123169482 | ADCY5 (+833)                        |
| chr17 | 47598195  | 47598696  | NXPH3 (-54774), NGFR (+25791)       |
| chr12 | 125325988 | 125327512 | NCOR2 (-346952), SCARB1 (+21643)    |
| chr5  | 692327    | 694594    | TPPP (+49)                          |
| chr1  | 228194680 | 228195716 | WNT3A (+446)                        |
| chr14 | 90258997  | 90260726  | FOXN3 (-174388), EFCAB11 (+161171)  |
| chr2  | 30912184  | 30912935  | CAPN13 (+117752), LCLAT1 (+242437)  |
| chr15 | 93631384  | 93632377  | RGMA (-14789)                       |
| chr15 | 100913260 | 100914079 | ADAMTS17 (-31460), CERS3 (+171255)  |
| chr21 | 33244828  | 33246510  | HUNK (+41)                          |
| chr7  | 27147491  | 27148477  | HOXA2 (-5554), HOXA3 (+11230)       |
| chr6  | 50793111  | 50795867  | TFAP2B (+8053)                      |

**Supplementary Table 2-1. BCC-UP-H3K27ac**

|                |                           |
|----------------|---------------------------|
| CHST11         | chr12:104871481-104873181 |
| TUBGCP5        | chr15:22448341-22449034   |
| PDGFD          | chr11:104575424-104576662 |
| SDK1           | chr7:3132233-3132734      |
| RASA1          | chr5:86417337-86417838    |
| STK17B         | chr2:197127182-197127994  |
| COMT           | chr22:19878420-19880541   |
| RICTOR         | chr5:39176978-39177706    |
| CECR5          | chr22:17699725-17700226   |
| SPOCD1         | chr1:32354799-32355522    |
| TGFBR1         | chr9:101819307-101822442  |
| LCP2           | chr5:169723413-169725687  |
| LRTM1          | chr3:55519129-55522574    |
| FLI1           | chr11:128480585-128481620 |
| COG6           | chr13:40351299-40351800   |
| AMIGO2         | chr12:47670022-47671507   |
| SLA            | chr8:134151205-134152602  |
| IKZF1          | chr7:50307013-50308538    |
| COL3A1         | chr2:189466055-189466682  |
| VMP1           | chr17:57841368-57842237   |
| IRF2BP2        | chr1:234907247-234909773  |
| SLA            | chr8:134164132-134165796  |
| MTAP           | chr9:21558385-21560043    |
| SLC7A5         | chr16:87928245-87931608   |
| CCM2           | chr7:45066503-45068093    |
| ZNF414         | chr19:8634371-8636559     |
| C1QTNF3        | chr5:34498630-34500034    |
| PPIF           | chr10:81082003-81082910   |
| PRR3           | chr6:30476909-30477781    |
| THBS2          | chr6:169434925-169435907  |
| NOX4           | chr11:89112637-89115967   |
| CAB39          | chr2:231526038-231526900  |
| VMP1           | chr17:57838144-57840866   |
| TRAF3IP3       | chr1:209941066-209943913  |
| H2AFY          | chr5:134769405-134770284  |
| PLCG2          | chr16:81501996-81504508   |
| AHR            | chr7:17624999-17625500    |
| GPR39          | chr2:132426825-132427790  |
| ENSG0000018231 | chr8:8202300-8205236      |
| LPCAT1         | chr5:1792884-1793557      |
| CDK5R1         | chr17:30878085-30878782   |
| MYO1F          | chr19:8641191-8642437     |
| LRRRC8D        | chr1:90222323-90224442    |
| ABI3           | chr17:47294547-47297199   |
| APCDD1         | chr18:10139931-10140675   |
| TOX2           | chr20:42569624-42572221   |
| RAP2B          | chr3:152861923-152864061  |
| CLVS1          | chr8:61841481-61842166    |
| HIF1A          | chr14:62127566-62130225   |
| COG6           | chr13:40350062-40350563   |
| SLAMF8         | chr1:159795811-159797414  |
| SMAD7          | chr18:46358828-46361999   |
| VSTM2L         | chr20:36451053-36451554   |
| PRPF40B        | chr12:50055168-50059785   |
| INPP4A         | chr2:99079762-99082494    |

|          |                          |
|----------|--------------------------|
| NABP1    | chr2:192351234-192352778 |
| APCDD1   | chr18:10366757-10367258  |
| ADAMTS12 | chr5:33789365-33790031   |
| GIMAP6   | chr7:150362735-150363825 |
| COL3A1   | chr2:189678666-189679167 |
| TPRG1    | chr3:188634319-188635529 |
| FASLG    | chr1:172606192-172610972 |
| SLC20A1  | chr2:113387908-113390104 |
| KIF26B   | chr1:245913747-245915905 |
| FGGY     | chr1:59395158-59395926   |
| AUTS2    | chr7:68741545-68742418   |
| APCDD1   | chr18:10304242-10305701  |
| PRG4     | chr1:186157655-186158156 |
| DYRK2    | chr12:67753128-67753629  |
| LRTM1    | chr3:54908909-54910043   |
| PRKACB   | chr1:84609279-84610525   |
| EFCAB1   | chr8:49319315-49323469   |
| PTPRU    | chr1:30180789-30184847   |
| TMC1     | chr9:75056470-75058230   |
| TAB2     | chr6:149357201-149357702 |
| PALLD    | chr4:169552261-169554306 |
| TRPS1    | chr8:117435915-117436416 |
| STK38L   | chr12:27332343-27332844  |
| CDK6     | chr7:92534127-92534628   |
| SEPP1    | chr5:42985030-42985531   |
| MEX3B    | chr15:82374429-82374930  |
| FABP4    | chr8:82411709-82412381   |
| C7orf10  | chr7:40337374-40337875   |
| CREG1    | chr1:167586598-167587099 |
| TGFB3    | chr14:76298257-76298885  |
| EMR1     | chr19:6801325-6803162    |
| KCMF1    | chr2:85173145-85173915   |
| SOX21    | chr13:95920541-95921042  |
| ZNF267   | chr16:31880100-31881588  |
| GJB6     | chr13:21002770-21003271  |
| GTF3C4   | chr9:135523378-135523879 |
| TCF4     | chr18:53456541-53458263  |
| JAG1     | chr20:11125205-11125706  |
| PTPRC    | chr1:198904810-198906714 |
| SLAMF6   | chr1:160545538-160546039 |
| EFCAB1   | chr8:49318285-49323865   |
| ERG      | chr21:40138686-40139187  |
| CREG2    | chr2:102012128-102012863 |
| SUPT3H   | chr6:45587952-45588453   |
| LAIR1    | chr19:54875996-54876756  |
| CAP1     | chr1:40524764-40526064   |
| AIG1     | chr6:143497136-143497637 |
| TSKU     | chr11:76411936-76412437  |
| APCDD1   | chr18:10376684-10380132  |
| SIGLEC9  | chr19:51625920-51628840  |
| ZFP57    | chr6:29676934-29677435   |
| FOXP1    | chr3:71544868-71545974   |
| APCDD1   | chr18:10365011-10365512  |
| DNMT3A   | chr2:25599916-25600417   |
| CALML3   | chr10:5605358-5608385    |
| CCR2     | chr3:46342823-46343532   |

|          |                           |
|----------|---------------------------|
| MYO5C    | chr15:52772711-52777375   |
| SUPT3H   | chr6:45622844-45625012    |
| PTPRU    | chr1:30180390-30186380    |
| NOX4     | chr11:89112191-89117537   |
| KCNA3    | chr1:111330223-111330724  |
| DOK1     | chr2:74803140-74804946    |
| WNT2     | chr7:116923740-116924241  |
| MFGE8    | chr15:89610675-89611864   |
| DYRK2    | chr12:67751187-67752167   |
| CLECL1   | chr12:9889519-9890237     |
| MDFIC    | chr7:114570181-114572098  |
| DOK1     | chr2:74801675-74802176    |
| ANKRD62  | chr18:12047787-12050812   |
| CSNK1A1L | chr13:38019816-38022674   |
| FZD2     | chr17:42634181-42634814   |
| ZNF618   | chr9:116430719-116431220  |
| GUCY1A2  | chr11:106913421-106914104 |
| CSNK1A1L | chr13:37743153-37743812   |
| PTGER4   | chr5:39755442-39756142    |
| FRMD4A   | chr10:14049803-14050834   |
| COL6A3   | chr2:238209083-238210134  |
| ASMTL    | chrX:1619728-1620229      |
| CRYBA4   | chr22:27529921-27531264   |
| ASB13    | chr10:5637496-5638558     |
| EXOC2    | chr6:1285806-1287824      |
| NUAK2    | chr1:205267211-205268418  |
| LY6H     | chr8:144272207-144273414  |
| ADO      | chr10:64396684-64398727   |
| CHST2    | chr3:142888556-142891052  |
| SLAMF1   | chr1:160678260-160678920  |
| PCCA     | chr13:100863151-100863652 |
| PTTG1IP  | chr21:46298633-46302403   |
| C7orf10  | chr7:40259859-40263266    |
| ADAM12   | chr10:127837312-127837813 |
| ARHGAP24 | chr4:86623821-86624322    |
| BCL2L14  | chr12:12111144-12111645   |
| ZPLD1    | chr3:101655124-101655973  |
| SIAH1    | chr16:48491610-48493329   |
| IFI44    | chr1:79115590-79116240    |
| NONE     | chr12:127653587-127654263 |
| NTM      | chr11:131934351-131934852 |
| ZNHIT6   | chr1:86620223-86621494    |
| SNX13    | chr7:17694083-17695883    |
| MAPKAP1  | chr9:128283378-128285411  |
| SLC1A4   | chr2:65033985-65035232    |
| BCL2L1   | chr20:30314941-30315751   |
| ADORA3   | chr1:112048852-112049353  |
| SPON2    | chr4:1194193-1199050      |
| RHOBTB1  | chr10:63156529-63158398   |
| COL3A1   | chr2:189757170-189759529  |
| BOD1L1   | chr4:13892871-13895087    |
| COL6A3   | chr2:238192615-238193116  |
| COL6A3   | chr2:238173454-238174161  |
| CSNK1A1L | chr13:37767525-37768026   |
| RIN3     | chr14:93029280-93030725   |
| FILIP1L  | chr3:99751882-99752759    |

|          |                           |
|----------|---------------------------|
| ELL2     | chr5:95481548-95482339    |
| PIM1     | chr6:37104628-37105945    |
| SPATS2L  | chr2:200903686-200904187  |
| IRF5     | chr7:128580333-128581232  |
| CDK5R1   | chr17:30895460-30895961   |
| SKAP1    | chr17:46561500-46562205   |
| STARD4   | chr5:111091629-111094516  |
| ASIC5    | chr4:156811047-156811959  |
| RUNX1    | chr21:36724851-36726049   |
| AGPS     | chr2:178294170-178294671  |
| STARD4   | chr5:111283166-111285644  |
| SIRPA    | chr20:1650364-1650865     |
| PSIP1    | chr9:15725315-15726023    |
| THBS1    | chr15:39006601-39007234   |
| ATP6V1G3 | chr1:198466677-198467178  |
| EXOC2    | chr6:1145629-1146306      |
| FOSL2    | chr2:28351757-28352258    |
| CDH26    | chr20:58630773-58631450   |
| RGS1     | chr1:192513949-192514450  |
| SNX13    | chr7:17701643-17703028    |
| PAG1     | chr8:82139216-82139717    |
| TRIB2    | chr2:12997082-12997717    |
| PLXDC1   | chr17:37294389-37296512   |
| DAO      | chr12:109299781-109300282 |
| PTPRC    | chr1:198898995-198899657  |
| NABP1    | chr2:192501703-192503615  |
| PRDM1    | chr6:106606937-106607438  |
| RSL24D1  | chr15:55545356-55545857   |
| SMIM15   | chr5:60614726-60616475    |
| FN1      | chr2:216525884-216526589  |
| H2AFY    | chr5:134772309-134776032  |
| B3GNT7   | chr2:232107295-232107796  |
| KLF3     | chr4:38372690-38373191    |
| AKR1E2   | chr10:4169790-4170291     |
| MTAP     | chr9:21575610-21577176    |
| TAB2     | chr6:149355479-149355980  |
| ARNTL    | chr11:13237542-13238746   |
| MDM4     | chr1:204482545-204483327  |
| GSTK1    | chr7:142937296-142937943  |
| CALML3   | chr10:5627207-5627834     |
| SMAD1    | chr4:146199782-146200964  |
| TRIB2    | chr2:12842544-12843494    |
| DIO2     | chr14:81236183-81236874   |
| FZD1     | chr7:90676366-90677411    |
| SNX13    | chr7:17718050-17721657    |
| CASQ2    | chr1:116323294-116326069  |
| STEAP2   | chr7:89807911-89808412    |
| STARD4   | chr5:111016712-111018570  |
| C11orf45 | chr11:128778509-128779505 |
| FAM124B  | chr2:225276365-225278672  |
| RASGRP3  | chr2:33754835-33755499    |
| TCF4     | chr18:53790857-53792465   |
| POU2F2   | chr19:42615800-42616301   |
| ERCC6L2  | chr9:98823828-98824329    |
| ELL2     | chr5:95484831-95486878    |
| S100B    | chr21:47971450-47972810   |

ENSG0000018231:chr8:8153373-8154217  
BOD1L1 chr4:13908729-13909809  
PRDM1 chr6:106034799-106035300  
ZNF469 chr16:88335245-88340362  
RNF135 chr17:29279393-29280168  
SHC3 chr9:91769683-91770184  
APCDD1 chr18:10239475-10240655  
SLC46A2 chr9:115624543-115625638  
TLK1 chr2:172101553-172102054  
CSNK1A1L chr13:37881128-37881756  
LTBP2 chr14:75083007-75088249  
GARNL3 chr9:129921306-129923613  
BOD1L1 chr4:13919091-13919726  
SPRED1 chr15:38342400-38343413  
CSNK1A1L chr13:38063423-38066451  
IGDCC3 chr15:65701259-65701896  
CAMK2G chr10:75654013-75654514  
PCSK6 chr15:102155728-102156229  
CPB2 chr13:46745898-46746864  
CHRNA1 chr2:175700774-175702491  
LRTM1 chr3:55511144-55526179  
ELK3 chr12:96438615-96439116  
FRMD4A chr10:14048872-14052755  
LRTM1 chr3:55515028-55516034  
IRGM chr5:150169522-150170807  
IRF2BP2 chr1:235153771-235155299  
PTPRC chr1:198745731-198746232  
CEBPE chr14:23639983-23641128  
IFT80 chr3:160121804-160122305  
NABP1 chr2:192500312-192500938  
TAOK3 chr12:118745016-118746246  
VMP1 chr17:57826541-57853759  
SIGLEC15 chr18:43381110-43384367  
FN1 chr2:216564861-216565715  
NEBL chr10:21687711-21688212  
COL5A1 chr9:137394354-137395068  
GPR39 chr2:132425601-132428239  
CTHRC1 chr8:104357388-104358324  
CALML3 chr10:5604965-5609495  
PRDM1 chr6:106040422-106040923  
FRMD4A chr10:14051439-14052496  
CRHBP chr5:76151662-76152465  
RUNX2 chr6:44634461-44635826  
SMAD7 chr18:46364921-46366009  
MATN1 chr1:30852042-30852817  
PITX1 chr5:134582005-134582689  
IL16 chr15:81384732-81385233  
S100A12 chr1:153358436-153359094  
PAPPA chr9:118358039-118359800  
CDK5RAP3 chr17:46078154-46081443  
SMAD7 chr18:46578917-46579418  
RAI14 chr5:34051437-34055140  
ST8SIA4 chr5:100113371-100114057  
EFCAB1 chr8:49331155-49332879  
ZFP36L1 chr14:69224160-69225423  
SULF2 chr20:46419238-46421794

|            |                           |
|------------|---------------------------|
| CHGB       | chr20:5634087-5635336     |
| APPL2      | chr12:105710670-105711444 |
| BCKDHB     | chr6:80934066-80934918    |
| CUX1       | chr7:101360492-101362359  |
| SYK        | chr9:93732151-93732652    |
| VGLL4      | chr3:11571027-11572511    |
| PRL        | chr6:22025533-22027727    |
| LECT2      | chr5:135348090-135348752  |
| RNASEH2B   | chr13:50969677-50970178   |
| APCDD1     | chr18:10056827-10061882   |
| ATP6V1G3   | chr1:198462213-198462714  |
| LCOR       | chr10:98500791-98501585   |
| RARS       | chr5:167836169-167837126  |
| SUPT3H     | chr6:45644871-45645652    |
| ADAMTS14   | chr10:72432415-72432916   |
| CHAF1B     | chr21:37801538-37803597   |
| LNX1       | chr4:54553455-54554570    |
| NRP2       | chr2:206564271-206565869  |
| FAP        | chr2:163097412-163102671  |
| MS4A6A     | chr11:59952986-59953680   |
| PYGB       | chr20:25298093-25299140   |
| ARHGEF26   | chr3:153331423-153333074  |
| TG         | chr8:133957426-133959646  |
| SENP8      | chr15:71920197-71923963   |
| MARCKS     | chr6:114134761-114135262  |
| SULF2      | chr20:46558362-46559255   |
| ZNF532     | chr18:56517151-56517652   |
| LRTM1      | chr3:54988354-54989120    |
| LYVE1      | chr11:10612770-10615412   |
| DFNB31     | chr9:117314383-117314884  |
| CTSB       | chr8:11731589-11736136    |
| SULF2      | chr20:46555639-46556140   |
| MAP1LC3B2  | chr12:116818861-116821143 |
| ETNK1      | chr12:22840130-22840758   |
| FAP        | chr2:163112487-163112988  |
| CTHRC1     | chr8:104383245-104385536  |
| COL3A1     | chr2:189489146-189489973  |
| ELL2       | chr5:95555631-95556132    |
| LY86       | chr6:6362959-6363460      |
| TARS       | chr5:33650474-33651109    |
| DCSTAMP    | chr8:105373054-105374451  |
| PRL        | chr6:21954299-21954981    |
| SLC29A3    | chr10:73132203-73132704   |
| TEP1       | chr14:20895956-20896913   |
| T          | chr6:166672040-166672541  |
| GALNT5     | chr2:158102463-158104137  |
| FAM129C    | chr19:17633631-17634882   |
| ZNF697     | chr1:120229591-120230092  |
| FOSL2      | chr2:28310132-28310633    |
| CASQ2      | chr1:116322923-116326671  |
| ST6GALNAC5 | chr1:76719409-76719910    |
| TANC2      | chr17:60972771-60973272   |
| ZEB1       | chr10:31434783-31437061   |
| CTHRC1     | chr8:104359070-104361830  |
| NTM        | chr11:131942315-131942965 |
| KIF13A     | chr6:17993088-17993589    |

|           |                           |
|-----------|---------------------------|
| APCDD1    | chr18:10373465-10382570   |
| SULF1     | chr8:70544809-70545310    |
| JAG1      | chr20:11188350-11189017   |
| SNX13     | chr7:17712942-17714919    |
| APPL2     | chr12:106051377-106054853 |
| EPHB3     | chr3:184166101-184166602  |
| CUX1      | chr7:101360168-101362939  |
| RASGRP1   | chr15:39542764-39544006   |
| PLSCR1    | chr3:146687296-146689220  |
| COL6A3    | chr2:238185746-238190225  |
| EFCAB1    | chr8:49814862-49817402    |
| GPATCH8   | chr17:42611306-42611969   |
| GSTA4     | chr6:52912771-52913981    |
| NUAK2     | chr1:205270555-205271345  |
| KIFC3     | chr16:57927204-57928407   |
| FZD2      | chr17:42633106-42636593   |
| APCDD1    | chr18:10054660-10063080   |
| WWC1      | chr5:167231309-167231810  |
| FAM3C     | chr7:121384728-121385369  |
| VMP1      | chr17:57843480-57846396   |
| RUFY1     | chr5:178803914-178807478  |
| SLTM      | chr15:59268256-59268757   |
| ZNF703    | chr8:37350385-37351396    |
| SNX19     | chr11:131630527-131631028 |
| ORM1      | chr9:117038330-117039022  |
| HNRNPA3   | chr2:177284106-177284607  |
| RNF135    | chr17:29281410-29282254   |
| CSNK1A1L  | chr13:37737090-37737591   |
| PIGC      | chr1:172352055-172352739  |
| GADD45G   | chr9:92445425-92446207    |
| RAP2A     | chr13:98039445-98040097   |
| RGCC      | chr13:42187143-42190291   |
| DCN       | chr12:91643816-91646331   |
| RRM2B     | chr8:103379685-103381394  |
| TMEM14E   | chr3:152338571-152339072  |
| IL18BP    | chr11:71655546-71656513   |
| SPECC1    | chr17:20110363-20110864   |
| ZFH3      | chr16:73186939-73187626   |
| HPRT1     | chrX:133683067-133685735  |
| PADI2     | chr1:17515857-17517367    |
| WEE2      | chr7:141372653-141375365  |
| PTPRC     | chr1:198743665-198748236  |
| SH2B2     | chr7:101765611-101766112  |
| PITX1     | chr5:134725167-134729798  |
| S100A8    | chr1:153362961-153363462  |
| MME       | chr3:154796464-154798329  |
| TWIST2    | chr2:239432174-239432675  |
| SPP2      | chr2:235149888-235150660  |
| ANKRD33   | chr12:52213711-52214702   |
| APCDD1    | chr18:10238320-10241369   |
| RUFY1     | chr5:178803841-178805854  |
| SEPT11    | chr4:77674420-77676497    |
| DAB2      | chr5:39525932-39528122    |
| TMEM260   | chr14:56800026-56801184   |
| TNFRSF10D | chr8:23033825-23035586    |
| XCR1      | chr3:46132438-46132939    |



|           |                           |
|-----------|---------------------------|
| SPRED1    | chr15:38335209-38335857   |
| APCDD1    | chr18:10039980-10040990   |
| ZC3H15    | chr2:187213507-187214176  |
| C11orf45  | chr11:128774568-128776188 |
| PRL       | chr6:22827631-22829470    |
| PIK3R6    | chr17:8826124-8826625     |
| AASDHPPT  | chr11:106268993-106269849 |
| COPS8     | chr2:238005870-238006502  |
| NTM       | chr11:131941297-131941798 |
| SLC24A2   | chr9:20319297-20319798    |
| PRL       | chr6:22364260-22364761    |
| ZNF532    | chr18:56451600-56453759   |
| CUL3      | chr2:225746389-225747066  |
| APPL2     | chr12:106050759-106055392 |
| EFHD2     | chr1:15585845-15586476    |
| EPHA4     | chr2:221988780-221989409  |
| LGMN      | chr14:93252289-93252790   |
| GREM1     | chr15:33131115-33131616   |
| FAM120B   | chr6:170714733-170715415  |
| C7orf10   | chr7:40854630-40855131    |
| MRC2      | chr17:60690891-60691392   |
| BCL11B    | chr14:99500937-99503750   |
| ZNF503    | chr10:77371476-77371977   |
| SGCA      | chr17:48254028-48257361   |
| PRL       | chr6:22366880-22367513    |
| HS3ST2    | chr16:22703006-22707618   |
| TNFRSF19  | chr13:24079205-24079706   |
| COPS8     | chr2:238121651-238123742  |
| ARL11     | chr13:50202629-50203130   |
| COPS8     | chr2:238107285-238112579  |
| MMD       | chr17:53511169-53511670   |
| SLC16A9   | chr10:61321536-61322037   |
| ARHGEF4   | chr2:131669132-131670244  |
| CD9       | chr12:6250856-6251507     |
| CD163L1   | chr12:7651931-7652704     |
| HOXB2     | chr17:46623874-46626298   |
| ME3       | chr11:86226317-86227839   |
| LIPC      | chr15:58809495-58810227   |
| ZPLD1     | chr3:101848561-101850015  |
| GALNT5    | chr2:158101284-158104499  |
| CD163     | chr12:7708836-7709337     |
| BMP7      | chr20:55606310-55606811   |
| NR2F1     | chr5:92544633-92545559    |
| C10orf11  | chr10:77228405-77229677   |
| TMEM241   | chr18:20882643-20884044   |
| MYH2      | chr17:10459523-10460316   |
| T         | chr6:166671273-166674468  |
| NABP1     | chr2:192301384-192302486  |
| VMP1      | chr17:57868993-57870799   |
| REXO1L10P | chr8:86847643-86848144    |
| COL6A3    | chr2:238190976-238191775  |
| SEC16B    | chr1:178029353-178030212  |
| TNN       | chr1:175097617-175101372  |
| PROX1     | chr1:213500387-213501393  |
| RAPGEF2   | chr4:160100485-160101376  |
| NAPG      | chr18:10518164-10520329   |

|          |                           |
|----------|---------------------------|
| XRCC6BP1 | chr12:58813321-58813953   |
| DUSP10   | chr1:222216726-222217227  |
| TIGD2    | chr4:90390958-90391459    |
| TBX2     | chr17:59363638-59364268   |
| HMGA2    | chr12:66334825-66335326   |
| HGF      | chr7:81475204-81475705    |
| MS4A6A   | chr11:59950011-59950659   |
| SLC14A2  | chr18:42914965-42915466   |
| CYP19A1  | chr15:51494500-51496031   |
| APCDD1   | chr18:10111655-10112156   |
| RASGRP1  | chr15:39524085-39525187   |
| IGFL1    | chr19:46701926-46703020   |
| APCDD1   | chr18:10284719-10287742   |
| ILDR1    | chr3:121713967-121714815  |
| WWC1     | chr5:167246314-167249461  |
| SLC11A1  | chr2:219196712-219198018  |
| DBF4B    | chr17:42664338-42664839   |
| HMGA2    | chr12:66218164-66219928   |
| FYN      | chr6:112305415-112308866  |
| NPVF     | chr7:26140487-26141831    |
| NIPBL    | chr5:36657337-36659050    |
| TMEM26   | chr10:63511205-63511875   |
| PDE7B    | chr6:136356164-136359921  |
| TGFBR2   | chr3:30619390-30619891    |
| TSPAN8   | chr12:71975436-71975937   |
| ARHGAP26 | chr5:142440820-142441877  |
| ZSCAN10  | chr16:3136629-3138644     |
| GADD45G  | chr9:92480144-92480645    |
| GJB6     | chr13:20933870-20934598   |
| ZFAND5   | chr9:75094211-75094712    |
| ZNF251   | chr8:145992315-145994292  |
| PRICKLE2 | chr3:64328654-64331836    |
| HPRT1    | chrX:133682010-133686284  |
| WNT2B    | chr1:112972762-112973833  |
| C10orf99 | chr10:85930963-85931656   |
| RNF135   | chr17:29282863-29284574   |
| PHACTR1  | chr6:12585457-12586436    |
| SLC25A33 | chr1:9503831-9504462      |
| HOOK1    | chr1:60208064-60211162    |
| KIF13A   | chr6:17992814-17994895    |
| APPL2    | chr12:105955550-105956051 |
| SULF2    | chr20:46557114-46557806   |
| DFNA5    | chr7:25010336-25012284    |
| AHR      | chr7:16955728-16956229    |
| SIGLEC7  | chr19:51644984-51645485   |
| APPL2    | chr12:106387484-106387985 |
| KCNN3    | chr1:154883675-154884176  |
| FZD5     | chr2:208656841-208657672  |
| PRR5L    | chr11:36171511-36172012   |
| ASF1A    | chr6:119089338-119089839  |
| ZPLD1    | chr3:101875467-101875968  |
| FLVCR2   | chr14:76076973-76077474   |
| PDE7B    | chr6:136316087-136316738  |
| HMGA2    | chr12:66216786-66221574   |
| MYO10    | chr5:17105520-17106021    |
| LAMB1    | chr7:107639193-107639694  |

|          |                           |
|----------|---------------------------|
| TUBGCP5  | chr15:22486693-22492501   |
| FGFR2    | chr10:123092432-123092933 |
| ARL15    | chr5:53685279-53685780    |
| NONE     | chr3:77873944-77874445    |
| GJB6     | chr13:20998258-21000635   |
| PROX1    | chr1:213498316-213502375  |
| SH2B2    | chr7:101585615-101586116  |
| MIPEP    | chr13:24313311-24313812   |
| SULF2    | chr20:46537883-46538726   |
| SESN3    | chr11:95328932-95329433   |
| FAM20C   | chr7:119057-120063        |
| FAM20C   | chr7:118259-120488        |
| TBC1D29  | chr17:28994557-28995198   |
| SCARB1   | chr12:125353132-125353859 |
| IRX4     | chr5:2685961-2686462      |
| BMP7     | chr20:55575121-55575622   |
| SACS     | chr13:24146375-24146876   |
| HOOK1    | chr1:60217881-60218838    |
| APPL2    | chr12:106313473-106313974 |
| SKAP2    | chr7:27032577-27033248    |
| APLNR    | chr11:56980861-56982154   |
| KLF3     | chr4:38083751-38084419    |
| PDE7B    | chr6:136333212-136333713  |
| NTMT1    | chr9:132107877-132108378  |
| FAM210A  | chr18:13499941-13503050   |
| CACNA1E  | chr1:181069125-181071205  |
| REP15    | chr12:27695548-27696049   |
| PRICKLE2 | chr3:64325254-64333181    |
| ZNF618   | chr9:116360783-116361284  |
| SLC6A1   | chr3:10973967-10979867    |
| RIOK1    | chr6:7331459-7333595      |
| CD9      | chr12:6254519-6255150     |
| CBR4     | chr4:169724428-169724929  |
| FAM210A  | chr18:13499353-13505121   |
| LRTM2    | chr12:1921087-1921588     |
| PROX1    | chr1:213498848-213499482  |
| GJB6     | chr13:20805118-20807228   |
| LCE5A    | chr1:152421125-152421883  |
| RGCC     | chr13:42184166-42185884   |
| IGF2BP2  | chr3:185435031-185436236  |
| DLX2     | chr2:172959404-172960250  |
| EIF1B    | chr3:40086424-40086925    |
| HMGA2    | chr12:66025649-66026830   |
| NINJ2    | chr12:706954-707455       |
| XYLT2    | chr17:48396106-48396878   |
| HAPLN1   | chr5:83677819-83680881    |
| CTSO     | chr4:157695101-157695756  |
| MGAT4A   | chr2:99441203-99441890    |
| BNC2     | chr9:16626940-16628949    |
| CITED2   | chr6:139899086-139899587  |
| SUSD4    | chr1:223673370-223673871  |
| MYCN     | chr2:16080943-16081444    |
| PHACTR1  | chr6:12354874-12355375    |
| KRT34    | chr17:39551277-39551778   |
| EDN2     | chr1:41949819-41950320    |
| SLC16A7  | chr12:59413757-59414857   |

|          |                           |
|----------|---------------------------|
| SOX4     | chr6:21664534-21665035    |
| HOXB7    | chr17:46687509-46691114   |
| PDGFA    | chr7:430806-432275        |
| SLC41A2  | chr12:104871481-104873181 |
| OR4N4    | chr15:22448341-22449034   |
| CASP12   | chr11:104575424-104576662 |
| CARD11   | chr7:3132233-3132734      |
| COX7C    | chr5:86417337-86417838    |
| HECW2    | chr2:197127182-197127994  |
| GNB1L    | chr22:19878420-19880541   |
| FYB      | chr5:39176978-39177706    |
| CECR1    | chr22:17699725-17700226   |
| PTP4A2   | chr1:32354799-32355522    |
| COL15A1  | chr9:101819307-101822442  |
| WNT5A    | chr3:55519129-55522574    |
| ETS1     | chr11:128480585-128481620 |
| FOXO1    | chr13:40351299-40351800   |
| RPAP3    | chr12:47670022-47671507   |
| WISP1    | chr8:134151205-134152602  |
| C7orf72  | chr7:50307013-50308538    |
| GULP1    | chr2:189466055-189466682  |
| TUBD1    | chr17:57841368-57842237   |
| TOMM20   | chr1:234907247-234909773  |
| WISP1    | chr8:134164132-134165796  |
| IFNE     | chr9:21558385-21560043    |
| CA5A     | chr16:87928245-87931608   |
| MYO1F    | chr19:8634371-8636559     |
| RAI14    | chr5:34498630-34500034    |
| ZMIZ1    | chr10:81082003-81082910   |
| HLA-E    | chr6:30476909-30477781    |
| SMOC2    | chr6:169434925-169435907  |
| TYR      | chr11:89112637-89115967   |
| SP100    | chr2:231526038-231526900  |
| TUBD1    | chr17:57838144-57840866   |
| IRF6     | chr1:209941066-209943913  |
| C5orf20  | chr5:134769405-134770284  |
| CMIP     | chr16:81501996-81504508   |
| SNX13    | chr7:17624999-17625500    |
| MZT2A    | chr2:132426825-132427790  |
| ZNF705B  | chr8:8202300-8205236      |
| MRPL36   | chr5:1792884-1793557      |
| MYO1D    | chr17:30878085-30878782   |
| LRR8C    | chr1:90222323-90224442    |
| PHOSPHO1 | chr17:47294547-47297199   |
| VAPA     | chr18:10139931-10140675   |
| JPH2     | chr20:42569624-42572221   |
| P2RY1    | chr3:152861923-152864061  |
| CHD7     | chr8:61841481-61842166    |
| PRKCH    | chr14:62127566-62130225   |
| FOXO1    | chr13:40350062-40350563   |
| CTIF     | chr18:46358828-46361999   |
| CTNBL1   | chr20:36451053-36451554   |
| FMNL3    | chr12:50055168-50059785   |
| COA5     | chr2:99079762-99082494    |
| MYO1B    | chr2:192351234-192352778  |
| VAPA     | chr18:10366757-10367258   |

|          |                          |
|----------|--------------------------|
| TARS     | chr5:33789365-33790031   |
| GIMAP2   | chr7:150362735-150363825 |
| GULP1    | chr2:189678666-189679167 |
| LPP      | chr3:188634319-188635529 |
| SUCO     | chr1:172606192-172610972 |
| CHCHD5   | chr2:113387908-113390104 |
| SMYD3    | chr1:245913747-245915905 |
| JUN      | chr1:59395158-59395926   |
| VAPA     | chr18:10304242-10305701  |
| HMCN1    | chr1:186157655-186158156 |
| CAND1    | chr12:67753128-67753629  |
| CACNA2D3 | chr3:54908909-54910043   |
| UBE2V2   | chr8:49319315-49323469   |
| ZFAND5   | chr9:75056470-75058230   |
| UST      | chr6:149357201-149357702 |
| CBR4     | chr4:169552261-169554306 |
| EIF3H    | chr8:117435915-117436416 |
| MED21    | chr12:27332343-27332844  |
| SAMD9    | chr7:92534127-92534628   |
| ZNF131   | chr5:42985030-42985531   |
| EFTUD1   | chr15:82374429-82374930  |
| FABP12   | chr8:82411709-82412381   |
| RCS1     | chr1:167586598-167587099 |
| TTL5     | chr14:76298257-76298885  |
| VAV1     | chr19:6801325-6803162    |
| TMSB10   | chr2:85173145-85173915   |
| ABCC4    | chr13:95920541-95921042  |
| CRYL1    | chr13:21002770-21003271  |
| BARHL1   | chr9:135523378-135523879 |
| TXNL1    | chr18:53456541-53458263  |
| CD84     | chr1:160545538-160546039 |
| UBE2V2   | chr8:49318285-49323865   |
| ETS2     | chr21:40138686-40139187  |
| RFX8     | chr2:102012128-102012863 |
| CLIC5    | chr6:45587952-45588453   |
| PPT1     | chr1:40524764-40526064   |
| ADAT2    | chr6:143497136-143497637 |
| LRR32    | chr11:76411936-76412437  |
| VAPA     | chr18:10376684-10380132  |
| HLA-F    | chr6:29676934-29677435   |
| EIF4E3   | chr3:71544868-71545974   |
| VAPA     | chr18:10365011-10365512  |
| DTNB     | chr2:25599916-25600417   |
| ASB13    | chr10:5605358-5608385    |
| CCR3     | chr3:46342823-46343532   |
| MYO5A    | chr15:52772711-52777375  |
| CLIC5    | chr6:45622844-45625012   |
| TYR      | chr11:89112191-89117537  |
| CD53     | chr1:111330223-111330724 |
| M1AP     | chr2:74803140-74804946   |
| ST7      | chr7:116923740-116924241 |
| ABHD2    | chr15:89610675-89611864  |
| CAND1    | chr12:67751187-67752167  |
| M1AP     | chr2:74801675-74802176   |
| IMPA2    | chr18:12047787-12050812  |
| POSTN    | chr13:38019816-38022674  |

|          |                           |
|----------|---------------------------|
| RGS3     | chr9:116430719-116431220  |
| CWF19L2  | chr11:106913421-106914104 |
| POSTN    | chr13:37743153-37743812   |
| DAB2     | chr5:39755442-39756142    |
| PRPF18   | chr10:14049803-14050834   |
| COPS8    | chr2:238209083-238210134  |
| P2RY8    | chrX:1619728-1620229      |
| MN1      | chr22:27529921-27531264   |
| CALML3   | chr10:5637496-5638558     |
| FOXQ1    | chr6:1285806-1287824      |
| TMCC2    | chr1:205267211-205268418  |
| GPIHBP1  | chr8:144272207-144273414  |
| ZNF365   | chr10:64396684-64398727   |
| SLC9A9   | chr3:142888556-142891052  |
| CD48     | chr1:160678260-160678920  |
| GGACT    | chr13:100863151-100863652 |
| ITGB2    | chr21:46298633-46302403   |
| FANK1    | chr10:127837312-127837813 |
| MAPK10   | chr4:86623821-86624322    |
| ETV6     | chr12:12111144-12111645   |
| NFKBIZ   | chr3:101655124-101655973  |
| N4BP1    | chr16:48491610-48493329   |
| OPCML    | chr11:131934351-131934852 |
| COL24A1  | chr1:86620223-86621494    |
| AHR      | chr7:17694083-17695883    |
| GAPVD1   | chr9:128283378-128285411  |
| SERTAD2  | chr2:65033985-65035232    |
| CTBP1    | chr4:1194193-1199050      |
| TMEM26   | chr10:63156529-63158398   |
| GULP1    | chr2:189757170-189759529  |
| COPS8    | chr2:238192615-238193116  |
| COPS8    | chr2:238173454-238174161  |
| POSTN    | chr13:37767525-37768026   |
| LGMN     | chr14:93029280-93030725   |
| COL8A1   | chr3:99751882-99752759    |
| PCSK1    | chr5:95481548-95482339    |
| COX6A1P2 | chr6:37104628-37105945    |
| TYW5     | chr2:200903686-200904187  |
| TNPO3    | chr7:128580333-128581232  |
| MYO1D    | chr17:30895460-30895961   |
| HOXB1    | chr17:46561500-46562205   |
| NREP     | chr5:111091629-111094516  |
| TDO2     | chr4:156811047-156811959  |
| SETD4    | chr21:36724851-36726049   |
| TTC30B   | chr2:178294170-178294671  |
| NREP     | chr5:111283166-111285644  |
| SIRPG    | chr20:1650364-1650865     |
| RASGRP1  | chr15:39006601-39007234   |
| NEK7     | chr1:198466677-198467178  |
| FOXQ1    | chr6:1145629-1146306      |
| RBKS     | chr2:28351757-28352258    |
| RGS21    | chr1:192513949-192514450  |
| AHR      | chr7:17701643-17703028    |
| FABP5    | chr8:82139216-82139717    |
| LASP1    | chr17:37294389-37296512   |
| SVOP     | chr12:109299781-109300282 |

|         |                           |
|---------|---------------------------|
| MYO1B   | chr2:192501703-192503615  |
| ATG5    | chr6:106606937-106607438  |
| RAB27A  | chr15:55545356-55545857   |
| ZSWIM6  | chr5:60614726-60616475    |
| MREG    | chr2:216525884-216526589  |
| C5orf20 | chr5:134772309-134776032  |
| HTR2B   | chr2:232107295-232107796  |
| PTTG2   | chr4:38372690-38373191    |
| KLF6    | chr10:4169790-4170291     |
| IFNE    | chr9:21575610-21577176    |
| UST     | chr6:149355479-149355980  |
| TEAD1   | chr11:13237542-13238746   |
| TAS2R40 | chr7:142937296-142937943  |
| ASB13   | chr10:5627207-5627834     |
| OTUD4   | chr4:146199782-146200964  |
| CEP128  | chr14:81236183-81236874   |
| CDK14   | chr7:90676366-90677411    |
| AHR     | chr7:17718050-17721657    |
| NHLH2   | chr1:116323294-116326069  |
| STEAP1  | chr7:89807911-89808412    |
| NREP    | chr5:111016712-111018570  |
| CUL3    | chr2:225276365-225278672  |
| TXNL1   | chr18:53790857-53792465   |
| ZNF574  | chr19:42615800-42616301   |
| HSD17B3 | chr9:98823828-98824329    |
| PCSK1   | chr5:95484831-95486878    |
| DIP2A   | chr21:47971450-47972810   |
| ZNF705B | chr8:8153373-8154217      |
| PREP    | chr6:106034799-106035300  |
| BANP    | chr16:88335245-88340362   |
| ADAP2   | chr17:29279393-29280168   |
| S1PR3   | chr9:91769683-91770184    |
| VAPA    | chr18:10239475-10240655   |
| SNX30   | chr9:115624543-115625638  |
| METTL8  | chr2:172101553-172102054  |
| POSTN   | chr13:37881128-37881756   |
| AREL1   | chr14:75083007-75088249   |
| ANGPTL2 | chr9:129921306-129923613  |
| TMCO5A  | chr15:38342400-38343413   |
| POSTN   | chr13:38063423-38066451   |
| IGDCC4  | chr15:65701259-65701896   |
| PLAU    | chr10:75654013-75654514   |
| TM2D3   | chr15:102155728-102156229 |
| LCP1    | chr13:46745898-46746864   |
| CHN1    | chr2:175700774-175702491  |
| WNT5A   | chr3:55511144-55526179    |
| LTA4H   | chr12:96438615-96439116   |
| PRPF18  | chr10:14048872-14052755   |
| WNT5A   | chr3:55515028-55516034    |
| SMIM3   | chr5:150169522-150170807  |
| TOMM20  | chr1:235153771-235155299  |
| SLC7A8  | chr14:23639983-23641128   |
| MYO1B   | chr2:192500312-192500938  |
| PEBP1   | chr12:118745016-118746246 |
| TUBD1   | chr17:57826541-57853759   |
| SLC14A1 | chr18:43381110-43384367   |

|          |                           |
|----------|---------------------------|
| MREG     | chr2:216564861-216565715  |
| SKIDA1   | chr10:21687711-21688212   |
| RXRA     | chr9:137394354-137395068  |
| MZT2A    | chr2:132425601-132428239  |
| FZD6     | chr8:104357388-104358324  |
| ASB13    | chr10:5604965-5609495     |
| PREP     | chr6:106040422-106040923  |
| PRPF18   | chr10:14051439-14052496   |
| S100Z    | chr5:76151662-76152465    |
| CDC5L    | chr6:44634461-44635826    |
| CTIF     | chr18:46364921-46366009   |
| H2AFY    | chr5:134582005-134582689  |
| MESDC2   | chr15:81384732-81385233   |
| S100A8   | chr1:153358436-153359094  |
| DEC1     | chr9:118358039-118359800  |
| COPZ2    | chr17:46078154-46081443   |
| DYM      | chr18:46578917-46579418   |
| C1QTNF3  | chr5:34051437-34055140    |
| FAM174A  | chr5:100113371-100114057  |
| UBE2V2   | chr8:49331155-49332879    |
| RAD51B   | chr14:69224160-69225423   |
| GPCPD1   | chr20:5634087-5635336     |
| NUAK1    | chr12:105710670-105711444 |
| MYL10    | chr7:101360492-101362359  |
| AUH      | chr9:93732151-93732652    |
| ATG7     | chr3:11571027-11572511    |
| SOX4     | chr6:22025533-22027727    |
| TGFBI    | chr5:135348090-135348752  |
| DLEU1    | chr13:50969677-50970178   |
| VAPA     | chr18:10056827-10061882   |
| NEK7     | chr1:198462213-198462714  |
| PIK3AP1  | chr10:98500791-98501585   |
| WWC1     | chr5:167836169-167837126  |
| CLIC5    | chr6:45644871-45645652    |
| CLDN14   | chr21:37801538-37803597   |
| CHIC2    | chr4:54553455-54554570    |
| INO80D   | chr2:206564271-206565869  |
| ABHD12   | chr20:25298093-25299140   |
| RAP2B    | chr3:153331423-153333074  |
| SLA      | chr8:133957426-133959646  |
| THSD4    | chr15:71920197-71923963   |
| PREX1    | chr20:46558362-46559255   |
| MALT1    | chr18:56517151-56517652   |
| WNT5A    | chr3:54988354-54989120    |
| MRVI1    | chr11:10612770-10615412   |
| ATP6V1G1 | chr9:117314383-117314884  |
| DEFB136  | chr8:11731589-11736136    |
| PREX1    | chr20:46555639-46556140   |
| MED13L   | chr12:116818861-116821143 |
| IFIH1    | chr2:163112487-163112988  |
| GULP1    | chr2:189489146-189489973  |
| PCSK1    | chr5:95555631-95556132    |
| F13A1    | chr6:6362959-6363460      |
| ADAMTS12 | chr5:33650474-33651109    |
| DPYS     | chr8:105373054-105374451  |
| SOX4     | chr6:21954299-21954981    |



|            |                           |
|------------|---------------------------|
| C10orf105  | chr10:73132203-73132704   |
| OSGEP      | chr14:20895956-20896913   |
| SFT2D1     | chr6:166672040-166672541  |
| GPD2       | chr2:158102463-158104137  |
| PHGDH      | chr1:120229591-120230092  |
| RBKS       | chr2:28310132-28310633    |
| NHLH2      | chr1:116322923-116326671  |
| ST6GALNAC3 | chr1:76719409-76719910    |
| MARCH10    | chr17:60972771-60973272   |
| ZNF438     | chr10:31434783-31437061   |
| FZD6       | chr8:104359070-104361830  |
| OPCML      | chr11:131942315-131942965 |
| NHLRC1     | chr6:17993088-17993589    |
| VAPA       | chr18:10373465-10382570   |
| SLCO5A1    | chr8:70544809-70545310    |
| AHR        | chr7:17712942-17714919    |
| NUAK1      | chr12:106051377-106054853 |
| CHRD       | chr3:184166101-184166602  |
| MYL10      | chr7:101360168-101362939  |
| THBS1      | chr15:39542764-39544006   |
| ZIC4       | chr3:146687296-146689220  |
| COPS8      | chr2:238185746-238190225  |
| SNAI2      | chr8:49814862-49817402    |
| FZD2       | chr17:42611306-42611969   |
| ICK        | chr6:52912771-52913981    |
| TMCC2      | chr1:205270555-205271345  |
| CNGB1      | chr16:57927204-57928407   |
| VAPA       | chr18:10054660-10063080   |
| TENM2      | chr5:167231309-167231810  |
| PTPRZ1     | chr7:121384728-121385369  |
| TUBD1      | chr17:57843480-57846396   |
| ADAMTS2    | chr5:178803914-178807478  |
| RNF111     | chr15:59268256-59268757   |
| KCNU1      | chr8:37350385-37351396    |
| NTM        | chr11:131630527-131631028 |
| COL27A1    | chr9:117038330-117039022  |
| MTX2       | chr2:177284106-177284607  |
| ADAP2      | chr17:29281410-29282254   |
| POSTN      | chr13:37737090-37737591   |
| DNM3       | chr1:172352055-172352739  |
| DIRAS2     | chr9:92445425-92446207    |
| MBNL2      | chr13:98039445-98040097   |
| VWA8       | chr13:42187143-42190291   |
| BTG1       | chr12:91643816-91646331   |
| UBR5       | chr8:103379685-103381394  |
| P2RY1      | chr3:152338571-152339072  |
| RNF121     | chr11:71655546-71656513   |
| LGALS9B    | chr17:20110363-20110864   |
| PLAC1      | chrX:133683067-133685735  |
| PADI1      | chr1:17515857-17517367    |
| AGK        | chr7:141372653-141375365  |
| CUX1       | chr7:101765611-101766112  |
| H2AFY      | chr5:134725167-134729798  |
| ASB1       | chr2:239432174-239432675  |
| ARL4C      | chr2:235149888-235150660  |
| SCN8A      | chr12:52213711-52214702   |

|           |                           |
|-----------|---------------------------|
| VAPA      | chr18:10238320-10241369   |
| ADAMTS2   | chr5:178803841-178805854  |
| SHROOM3   | chr4:77674420-77676497    |
| PELI2     | chr14:56800026-56801184   |
| TNFRSF10A | chr8:23033825-23035586    |
| CCR1      | chr3:46132438-46132939    |
| TMCO5A    | chr15:38335209-38335857   |
| VAPA      | chr18:10039980-10040990   |
| FSIP2     | chr2:187213507-187214176  |
| PIK3R5    | chr17:8826124-8826625     |
| GUCY1A2   | chr11:106268993-106269849 |
| COL6A3    | chr2:238005870-238006502  |
| OPCML     | chr11:131941297-131941798 |
| MLLT3     | chr9:20319297-20319798    |
| MALT1     | chr18:56451600-56453759   |
| DOCK10    | chr2:225746389-225747066  |
| NUAK1     | chr12:106050759-106055392 |
| TMEM51    | chr1:15585845-15586476    |
| GOLGA5    | chr14:93252289-93252790   |
| FMN1      | chr15:33131115-33131616   |
| PSMB1     | chr6:170714733-170715415  |
| INHBA     | chr7:40854630-40855131    |
| TLK2      | chr17:60690891-60691392   |
| C10orf11  | chr10:77371476-77371977   |
| COL1A1    | chr17:48254028-48257361   |
| NPIP5     | chr16:22703006-22707618   |
| SACS      | chr13:24079205-24079706   |
| COL6A3    | chr2:238121651-238123742  |
| COL6A3    | chr2:238107285-238112579  |
| TMEM100   | chr17:53511169-53511670   |
| PHYHIPL   | chr10:61321536-61322037   |
| VWF       | chr12:6250856-6251507     |
| CD163     | chr12:7651931-7652704     |
| C11orf73  | chr11:86226317-86227839   |
| ADAM10    | chr15:58809495-58810227   |
| NFKBIZ    | chr3:101848561-101850015  |
| GPD2      | chr2:158101284-158104499  |
| APOBEC1   | chr12:7708836-7709337     |
| TFAP2C    | chr20:55606310-55606811   |
| ZNF503    | chr10:77228405-77229677   |
| CABLES1   | chr18:20882643-20884044   |
| MYH3      | chr17:10459523-10460316   |
| SFT2D1    | chr6:166671273-166674468  |
| MYO1B     | chr2:192301384-192302486  |
| TUBD1     | chr17:57868993-57870799   |
| PSKH2     | chr8:86847643-86848144    |
| COPS8     | chr2:238190976-238191775  |
| RASAL2    | chr1:178029353-178030212  |
| TNR       | chr1:175097617-175101372  |
| RPS6KC1   | chr1:213500387-213501393  |
| FNIP2     | chr4:160100485-160101376  |
| APCDD1    | chr18:10518164-10520329   |
| LRIG3     | chr12:58813321-58813953   |
| HHIPL2    | chr1:222216726-222217227  |
| SNCA      | chr4:90390958-90391459    |
| BCAS3     | chr17:59363638-59364268   |

ENSG0000022814 chr12:66334825-66335326  
CACNA2D1 chr7:81475204-81475705  
SETBP1 chr18:42914965-42915466  
AP4E1 chr15:51494500-51496031  
VAPA chr18:10111655-10112156  
THBS1 chr15:39524085-39525187  
IGFL2 chr19:46701926-46703020  
VAPA chr18:10284719-10287742  
SLC15A2 chr3:121713967-121714815  
TENM2 chr5:167246314-167249461  
TMBIM1 chr2:219196712-219198018  
FZD2 chr17:42664338-42664839  
ENSG0000022814 chr12:66218164-66219928  
WISP3 chr6:112305415-112308866  
NFE2L3 chr7:26140487-26141831  
SLC1A3 chr5:36657337-36659050  
ARID5B chr10:63511205-63511875  
MTFR2 chr6:136356164-136359921  
THAP2 chr12:71975436-71975937  
NR3C1 chr5:142440820-142441877  
IL32 chr16:3136629-3138644  
DIRAS2 chr9:92480144-92480645  
CRYL1 chr13:20933870-20934598  
TMC1 chr9:75094211-75094712  
ZNF34 chr8:145992315-145994292  
ADAMTS9 chr3:64328654-64331836  
PLAC1 chrX:133682010-133686284  
CTTNBP2NL chr1:112972762-112973833  
ADAP2 chr17:29282863-29284574  
EDN1 chr6:12585457-12586436  
SPSB1 chr1:9503831-9504462  
FGGY chr1:60208064-60211162  
NHLRC1 chr6:17992814-17994895  
NUAK1 chr12:105955550-105956051  
PREX1 chr20:46557114-46557806  
OSBPL3 chr7:25010336-25012284  
AGR3 chr7:16955728-16956229  
NUAK1 chr12:106387484-106387985  
PMVK chr1:154883675-154884176  
PLEKHM3 chr2:208656841-208657672  
LDLRAD3 chr11:36171511-36172012  
CEP85L chr6:119089338-119089839  
NFKBIZ chr3:101875467-101875968  
C14orf1 chr14:76076973-76077474  
MTFR2 chr6:136316087-136316738  
ENSG0000022814 chr12:66216786-66221574  
BASP1 chr5:17105520-17106021  
DLD chr7:107639193-107639694  
OR4N4 chr15:22486693-22492501  
WDR11 chr10:123092432-123092933  
HSPB3 chr5:53685279-53685780  
CRYL1 chr13:20998258-21000635  
RPS6KC1 chr1:213498316-213502375  
CUX1 chr7:101585615-101586116  
TNFRSF19 chr13:24313311-24313812  
PREX1 chr20:46537883-46538726

|          |                           |
|----------|---------------------------|
| FAM76B   | chr11:95328932-95329433   |
| CRLF3    | chr17:28994557-28995198   |
| UBC      | chr12:125353132-125353859 |
| IRX2     | chr5:2685961-2686462      |
| TFAP2C   | chr20:55575121-55575622   |
| TNFRSF19 | chr13:24146375-24146876   |
| FGGY     | chr1:60217881-60218838    |
| NUAK1    | chr12:106313473-106313974 |
| HOXA1    | chr7:27032577-27033248    |
| LRRCS5   | chr11:56980861-56982154   |
| PTTG2    | chr4:38083751-38084419    |
| MTFR2    | chr6:136333212-136333713  |
| PPP2R4   | chr9:132107877-132108378  |
| LDLRAD4  | chr18:13499941-13503050   |
| MR1      | chr1:181069125-181071205  |
| PPFIBP1  | chr12:27695548-27696049   |
| ADAMTS9  | chr3:64325254-64333181    |
| RGS3     | chr9:116360783-116361284  |
| SLC6A11  | chr3:10973967-10979867    |
| SSR1     | chr6:7331459-7333595      |
| VWF      | chr12:6254519-6255150     |
| PALLD    | chr4:169724428-169724929  |
| LDLRAD4  | chr18:13499353-13505121   |
| ADIPOR2  | chr12:1921087-1921588     |
| RPS6KC1  | chr1:213498848-213499482  |
| CRNN     | chr1:152421125-152421883  |
| VWA8     | chr13:42184166-42185884   |
| SENP2    | chr3:185435031-185436236  |
| DLX1     | chr2:172959404-172960250  |
| MYRIP    | chr3:40086424-40086925    |
| MSRB3    | chr12:66025649-66026830   |
| B4GALNT3 | chr12:706954-707455       |
| TMEM92   | chr17:48396106-48396878   |
| EDIL3    | chr5:83677819-83680881    |
| PDGFC    | chr4:157695101-157695756  |
| TSGA10   | chr2:99441203-99441890    |
| CAPN8    | chr1:223673370-223673871  |
| EDN1     | chr6:12354874-12355375    |
| KRT31    | chr17:39551277-39551778   |
| LRIG3    | chr12:59413757-59414857   |
| PRL      | chr6:21664534-21665035    |
| FAM20C   | chr7:430806-432275        |

**Supplementary Table 2-2. BCC-DOWN-H3K27ac**

|          |                           |
|----------|---------------------------|
| PALM     | chr19:708232-710793       |
| DIO3     | chr14:102025515-102026611 |
| STK32A   | chr5:146614123-146614782  |
| C1orf87  | chr1:61508727-61509483    |
| MICALL2  | chr7:1506062-1507057      |
| NTRK2    | chr9:87282833-87287560    |
| KIAA1456 | chr8:12808716-12810028    |
| TMEM242  | chr6:157557065-157558357  |
| SFSWAP   | chr12:131531476-131533762 |
| SNX19    | chr11:130747932-130748433 |
| NLGN1    | chr3:173115182-173116085  |
| C2orf88  | chr2:191044786-191046363  |
| ADORA2B  | chr17:15689240-15690065   |
| INE1     | chrX:47060199-47060700    |
| CNEP1R1  | chr16:49872691-49873192   |
| MPP2     | chr17:41984314-41984815   |
| EBF4     | chr20:2672779-2673280     |
| CLIC6    | chr21:36041566-36044059   |
| NTRK2    | chr9:87282403-87288187    |
| GALNT16  | chr14:69726401-69729556   |
| ACADL    | chr2:211089455-211090133  |
| ADORA2B  | chr17:15689175-15690371   |
| FAHD2A   | chr2:96050796-96051423    |
| KLF15    | chr3:126074972-126075985  |
| DIO3     | chr14:101999292-102002832 |
| STK32A   | chr5:146613374-146615111  |
| MOB2     | chr11:1580088-1580589     |
| HRASLS5  | chr11:63258417-63258918   |
| SFSWAP   | chr12:131753109-131753610 |
| GFRA1    | chr10:118030073-118033924 |
| KCNK15   | chr20:43374290-43374931   |
| KIAA1456 | chr8:12808274-12810745    |
| KCNK7    | chr11:65373899-65374400   |
| TMEM55A  | chr8:91996841-91998100    |
| CNTFR    | chr9:34589094-34590706    |
| FAM150B  | chr2:287500-290082        |
| PPARA    | chr22:46422501-46423961   |
| COPS8    | chr2:237562939-237563440  |
| GPR84    | chr12:54772184-54773868   |
| TNFRSF6B | chr20:62323261-62324016   |
| LPCAT1   | chr5:1539209-1541447      |
| UAP1     | chr1:162517942-162519332  |
| SMOX     | chr20:4021682-4022394     |
| MTHFR    | chr1:11846815-11852883    |
| CLIC6    | chr21:36040841-36044634   |
| C12orf44 | chr12:52442584-52452944   |
| ELANE    | chr19:847632-849064       |
| GPR84    | chr12:54768810-54771452   |
| GNPTG    | chr16:1428687-1429726     |
| ALDH3A2  | chr17:19482632-19483329   |
| BAG5     | chr14:104015399-104019617 |
| C12orf44 | chr12:52429240-52431973   |
| ANGPTL2  | chr9:129873203-129874722  |
| C12orf44 | chr12:52455865-52457011   |
| CKB      | chr14:103985731-103989036 |

|          |                           |
|----------|---------------------------|
| NLGN1    | chr3:173112820-173113756  |
| SFSWAP   | chr12:131529378-131536009 |
| C12orf44 | chr12:52448335-52448836   |
| KLHL25   | chr15:86315394-86316189   |
| FAM184A  | chr6:119399234-119400558  |
| FASTKD3  | chr5:7802312-7802813      |
| USP44    | chr12:95942143-95942785   |
| GPR153   | chr1:6347807-6349048      |
| TMEM242  | chr6:157555978-157559161  |
| CDC14B   | chr9:99380084-99382622    |
| FAM150B  | chr2:286811-290447        |
| DIP2C    | chr10:733628-735598       |
| KCNT2    | chr1:196577149-196578679  |
| TEX261   | chr2:71205525-71206313    |
| TNXB     | chr6:32013958-32015421    |
| NUMBL    | chr19:41192804-41193482   |
| DNAH9    | chr17:11501842-11502343   |
| NRAP     | chr10:115406275-115406776 |
| CTGF     | chr6:132331969-132332792  |
| ZNRF2    | chr7:30173828-30177090    |
| RNF19A   | chr8:101524951-101525687  |
| C4orf6   | chr4:5206860-5207361      |
| MICALL2  | chr7:1505231-1509462      |
| FAM19A5  | chr22:48885798-48886299   |
| GFRA1    | chr10:118029350-118034722 |
| DIO3     | chr14:101997409-102003199 |
| ANKRD1   | chr10:92921739-92923944   |
| FAM189A2 | chr9:71939175-71940311    |
| CORO2B   | chr15:68876944-68877597   |
| SOX10    | chr22:38378955-38380851   |
| C11orf44 | chr11:130479170-130480391 |
| SLC9A8   | chr20:48363745-48365168   |
| ACADL    | chr2:211089156-211090713  |
| MAPK4    | chr18:48085850-48086351   |
| ACCSL    | chr11:43963597-43965719   |
| RBM24    | chr6:17280880-17282537    |
| RIPPLY3  | chr21:38352773-38353439   |
| ARHGEF16 | chr1:3418740-3419241      |
| OR10H5   | chr19:15890289-15890790   |
| ZFYVE21  | chr14:104189371-104190717 |
| SMAD2    | chr18:45554194-45555102   |
| RELN     | chr7:103630282-103630783  |
| TSHZ3    | chr19:32619263-32619902   |
| EPS15L1  | chr19:16507662-16513215   |
| DBI      | chr2:120063360-120064727  |
| TAB2     | chr6:149210545-149211046  |
| PKNOX2   | chr11:125034838-125035497 |
| PHLPP2   | chr16:71756732-71758108   |
| DMRTA1   | chr9:22447265-22447959    |
| PRRG3    | chrX:150863626-150864127  |
| FZR1     | chr19:3535995-3538018     |
| C11orf44 | chr11:130476305-130477000 |
| TUB      | chr11:8039715-8041984     |
| MPV17L   | chr16:15489396-15490447   |
| PCGF2    | chr17:36897960-36899099   |
| FAM189A2 | chr9:71939266-71941455    |

|                |                           |
|----------------|---------------------------|
| AGPAT3         | chr21:45344960-45345461   |
| GPR153         | chr1:6351266-6352674      |
| C1orf87        | chr1:61519137-61520656    |
| GPR133         | chr12:131404347-131406170 |
| ISX            | chr22:34535561-34536062   |
| LTBP4          | chr19:41105701-41106337   |
| COPS8          | chr2:237795340-237795841  |
| TC2N           | chr14:92350380-92352806   |
| INPP5A         | chr10:134227374-134227875 |
| TCP11          | chr6:35036313-35036814    |
| CNTFR          | chr9:34591215-34591927    |
| RNF19A         | chr8:101521121-101522614  |
| ANKRD6         | chr6:90142822-90143323    |
| TRAPPC10       | chr21:45356335-45357419   |
| TSHZ3          | chr19:32616501-32617149   |
| GPR153         | chr1:6346934-6353066      |
| DAD1           | chr14:22806466-22807519   |
| ANGPTL2        | chr9:129860781-129861553  |
| PCOLCE2        | chr3:142607249-142608617  |
| GMNC           | chr3:190580362-190581201  |
| EIF5           | chr14:103668487-103668988 |
| PGR            | chr11:100997614-100998910 |
| SPAG1          | chr8:101170220-101170865  |
| CNTFR          | chr9:34592997-34594364    |
| PI16           | chr6:36888841-36889342    |
| TSHZ3          | chr19:32620610-32621242   |
| STK39          | chr2:169048243-169048744  |
| PKN2           | chr1:88928424-88928925    |
| NFIA           | chr1:61508727-61509483    |
| INTS1          | chr7:1506062-1507057      |
| DLC1           | chr8:12808716-12810028    |
| ARID1B         | chr6:157557065-157558357  |
| GPR133         | chr12:131531476-131533762 |
| C11orf44       | chr11:130747932-130748433 |
| TBC1D26        | chr17:15689240-15690065   |
| ZNF423         | chr16:49872691-49873192   |
| RUNX1          | chr21:36041566-36044059   |
| ERH            | chr14:69726401-69729556   |
| TBC1D26        | chr17:15689175-15690371   |
| KCNIP3         | chr2:96050796-96051423    |
| ENSG0000026937 | chr14:101999292-102002832 |
| DUSP8          | chr11:1580088-1580589     |
| GPR133         | chr12:131753109-131753610 |
| DLC1           | chr8:12808274-12810745    |
| MAP3K11        | chr11:65373899-65374400   |
| NECAB1         | chr8:91996841-91998100    |
| WNT7B          | chr22:46422501-46423961   |
| ACKR3          | chr2:237562939-237563440  |
| ZNF385A        | chr12:54772184-54773868   |
| MRPL36         | chr5:1539209-1541447      |
| UHMK1          | chr1:162517942-162519332  |
| RNF24          | chr20:4021682-4022394     |
| AGTRAP         | chr1:11846815-11852883    |
| RUNX1          | chr21:36040841-36044634   |
| NR4A1          | chr12:52442584-52452944   |
| ZNF385A        | chr12:54768810-54771452   |

|                |                           |
|----------------|---------------------------|
| UNKL           | chr16:1428687-1429726     |
| SLC47A1        | chr17:19482632-19483329   |
| TRMT61A        | chr14:104015399-104019617 |
| NR4A1          | chr12:52429240-52431973   |
| RALGPS1        | chr9:129873203-129874722  |
| NR4A1          | chr12:52455865-52457011   |
| MARK3          | chr14:103985731-103989036 |
| GPR133         | chr12:131529378-131536009 |
| NR4A1          | chr12:52448335-52448836   |
| AKAP13         | chr15:86315394-86316189   |
| ADCY2          | chr5:7802312-7802813      |
| METAP2         | chr12:95942143-95942785   |
| ACOT7          | chr1:6347807-6349048      |
| ARID1B         | chr6:157555978-157559161  |
| ATP6V1B1       | chr2:71205525-71206313    |
| LTBP4          | chr19:41192804-41193482   |
| HABP2          | chr10:115406275-115406776 |
| MOXD1          | chr6:132331969-132332792  |
| PLEKHA8        | chr7:30173828-30177090    |
| ANKRD46        | chr8:101524951-101525687  |
| STK32B         | chr4:5206860-5207361      |
| INTS1          | chr7:1505231-1509462      |
| ENSG0000026937 | chr14:101997409-102003199 |
| PCGF5          | chr10:92921739-92923944   |
| ANP32A         | chr15:68876944-68877597   |
| ADAMTS15       | chr11:130479170-130480391 |
| B4GALT5        | chr20:48363745-48365168   |
| ALKBH3         | chr11:43963597-43965719   |
| HLC5           | chr21:38352773-38353439   |
| MEGF6          | chr1:3418740-3419241      |
| OR10H3         | chr19:15890289-15890790   |
| PPP1R13B       | chr14:104189371-104190717 |
| ZBTB7C         | chr18:45554194-45555102   |
| ZNF507         | chr19:32619263-32619902   |
| KLF2           | chr19:16507662-16513215   |
| STEAP3         | chr2:120063360-120064727  |
| UST            | chr6:149210545-149211046  |
| MARVELD3       | chr16:71756732-71758108   |
| MFSD12         | chr19:3535995-3538018     |
| ADAMTS15       | chr11:130476305-130477000 |
| EIF3F          | chr11:8039715-8041984     |
| ENSG0000026113 | chr16:15489396-15490447   |
| CISD3          | chr17:36897960-36899099   |
| ACOT7          | chr1:6351266-6352674      |
| NFIA           | chr1:61519137-61520656    |
| RAN            | chr12:131404347-131406170 |
| LARGE          | chr22:34535561-34536062   |
| NUMBL          | chr19:41105701-41106337   |
| ACKR3          | chr2:237795340-237795841  |
| FBLN5          | chr14:92350380-92352806   |
| STK32C         | chr10:134227374-134227875 |
| ANKS1A         | chr6:35036313-35036814    |
| ANKRD46        | chr8:101521121-101522614  |
| RRAGD          | chr6:90142822-90143323    |
| AGPAT3         | chr21:45356335-45357419   |
| ZNF507         | chr19:32616501-32617149   |



|         |                           |
|---------|---------------------------|
| ACOT7   | chr1:6346934-6353066      |
| OR4E2   | chr14:22806466-22807519   |
| RALGPS1 | chr9:129860781-129861553  |
| TNFAIP2 | chr14:103668487-103668988 |
| TMEM133 | chr11:100997614-100998910 |
| C6orf89 | chr6:36888841-36889342    |
| ZNF507  | chr19:32620610-32621242   |
| B3GALT1 | chr2:169048243-169048744  |

**Supplementary Table 2-3. SCC-UP-H3K27ac**

|          |                           |
|----------|---------------------------|
| CHST11   | chr12:104871481-104873181 |
| TUBGCP5  | chr15:22448341-22449034   |
| PDGFD    | chr11:104575424-104576662 |
| SDK1     | chr7:3132233-3132734      |
| RIN2     | chr20:19537456-19537957   |
| C7orf10  | chr7:40346540-40347041    |
| RASA1    | chr5:86417337-86417838    |
| STK17B   | chr2:197127182-197127994  |
| COMT     | chr22:19878420-19880541   |
| RICTOR   | chr5:39176978-39177706    |
| NID2     | chr14:52641095-52645097   |
| BPGM     | chr7:134301645-134311920  |
| CECR5    | chr22:17699725-17700226   |
| SPOCD1   | chr1:32354799-32355522    |
| GZMA     | chr5:54390536-54394082    |
| SNTB1    | chr8:121743906-121744568  |
| TGFBR1   | chr9:101819307-101822442  |
| TMEM121  | chr14:106471359-106471994 |
| LCP2     | chr5:169723413-169725687  |
| DCT      | chr13:94976055-94976832   |
| LRTM1    | chr3:55519129-55522574    |
| FLI1     | chr11:128480585-128481620 |
| GPR68    | chr14:91694341-91697117   |
| GZMA     | chr5:54396774-54401600    |
| COG6     | chr13:40351299-40351800   |
| OXNAD1   | chr3:16342086-16342587    |
| OR4E2    | chr14:22392341-22392842   |
| AMIGO2   | chr12:47670022-47671507   |
| SLA      | chr8:134151205-134152602  |
| VRK1     | chr14:98167745-98177409   |
| FASLG    | chr1:172668704-172669205  |
| NONE     | chr14:98654900-98656903   |
| ZNF703   | chr8:37132080-37135061    |
| IKZF1    | chr7:50307013-50308538    |
| COL3A1   | chr2:189466055-189466682  |
| VMP1     | chr17:57841368-57842237   |
| RASGRP1  | chr15:38869767-38870268   |
| IRF2BP2  | chr1:234907247-234909773  |
| ICA1     | chr7:8216108-8217698      |
| TMPPE    | chr3:33089191-33090459    |
| GZMA     | chr5:54331679-54334698    |
| SLA      | chr8:134164132-134165796  |
| COL24A1  | chr1:86673393-86673894    |
| CXCL13   | chr4:78506658-78510481    |
| C21orf62 | chr21:34303836-34305592   |
| MTAP     | chr9:21558385-21560043    |
| SLC7A5   | chr16:87928245-87931608   |
| CCM2     | chr7:45066503-45068093    |
| TMEM121  | chr14:106966240-106968290 |
| STAB2    | chr12:103834217-103837671 |
| SKAP1    | chr17:46529104-46532858   |
| ZNF414   | chr19:8634371-8636559     |
| TRMT10C  | chr3:101236265-101241264  |
| CCL5     | chr17:34222314-34229132   |
| SUN5     | chr20:31559015-31561109   |

|                |                           |
|----------------|---------------------------|
| FAM150B        | chr2:429126-431260        |
| C1QTNF3        | chr5:34498630-34500034    |
| PPIF           | chr10:81082003-81082910   |
| PRR3           | chr6:30476909-30477781    |
| TMEM75         | chr8:129587976-129589453  |
| TRABD2A        | chr2:85008136-85011569    |
| HRH4           | chr18:22236938-22237595   |
| BICD1          | chr12:32079971-32083131   |
| THBS2          | chr6:169434925-169435907  |
| SLC2A2         | chr3:170968355-170976961  |
| PTGFRN         | chr1:117311168-117312092  |
| EMB            | chr5:49928808-49932021    |
| NOX4           | chr11:89112637-89115967   |
| PLN            | chr6:118877499-118881450  |
| CAB39          | chr2:231526038-231526900  |
| STAC2          | chr17:37492466-37492967   |
| ERMN           | chr2:158259438-158263971  |
| VMP1           | chr17:57838144-57840866   |
| TRAF3IP3       | chr1:209941066-209943913  |
| CCL5           | chr17:34202088-34208435   |
| TRIB1          | chr8:126936883-126937544  |
| MAP3K8         | chr10:30667435-30667936   |
| CCDC126        | chr7:23578423-23580267    |
| H2AFY          | chr5:134769405-134770284  |
| XCL2           | chr1:168503000-168506905  |
| PLCG2          | chr16:81501996-81504508   |
| AHR            | chr7:17624999-17625500    |
| GPR39          | chr2:132426825-132427790  |
| ENSG0000018231 | chr8:8202300-8205236      |
| LPCAT1         | chr5:1792884-1793557      |
| CDK5R1         | chr17:30878085-30878782   |
| MYO1F          | chr19:8641191-8642437     |
| RPA3           | chr7:7983055-7987003      |
| FCN2           | chr9:137712411-137713104  |
| TMEM244        | chr6:130179922-130184224  |
| IFNG           | chr12:68511732-68512233   |
| SYNCRIP        | chr6:86379004-86379654    |
| CD96           | chr3:111029201-111031881  |
| MARCH4         | chr2:217213440-217219774  |
| ANO10          | chr3:43518801-43519302    |
| LRRRC8D        | chr1:90222323-90224442    |
| FAM3D          | chr3:59436642-59437482    |
| ST8SIA1        | chr12:22547298-22553209   |
| SAMHD1         | chr20:35669885-35673698   |
| RPLP1          | chr15:70007043-70007544   |
| PTGFRN         | chr1:117309203-117309704  |
| XCL2           | chr1:168389039-168393313  |
| SIRPG          | chr20:1634944-1648716     |
| BICD1          | chr12:32044158-32044659   |
| ALPK2          | chr18:56324336-56326887   |
| TDRD12         | chr19:33284069-33287465   |
| ST7            | chr7:116645929-116646430  |
| DCT            | chr13:94974776-94982877   |
| OR4E2          | chr14:22391009-22394377   |
| VRK1           | chr14:98067784-98073837   |
| MTG1           | chr10:135202578-135203544 |

|                |                           |
|----------------|---------------------------|
| LAT            | chr16:29039936-29041196   |
| ABI3           | chr17:47294547-47297199   |
| NCOA2          | chr8:71435414-71437742    |
| SIRPA          | chr20:1654472-1656044     |
| CMAS           | chr12:22315923-22318340   |
| PTPN9          | chr15:75898602-75899324   |
| ETS1           | chr11:127920191-127926104 |
| IFNGR1         | chr6:137708128-137713512  |
| APCDD1         | chr18:10139931-10140675   |
| CMC1           | chr3:27921905-27924415    |
| SMCHD1         | chr18:2601773-2607785     |
| ANKRD62        | chr18:12047213-12053969   |
| ZNF800         | chr7:127052965-127056259  |
| TOX2           | chr20:42569624-42572221   |
| RAP2B          | chr3:152861923-152864061  |
| PMFBP1         | chr16:72515753-72516254   |
| PMEPA1         | chr20:56425809-56426447   |
| EMB            | chr5:49740696-49742706    |
| ELL2           | chr5:95561701-95565394    |
| SLC28A3        | chr9:86944948-86945449    |
| FAM187B        | chr19:35731111-35731986   |
| ENSG0000011759 | chr1:99335832-99338130    |
| NONE           | chr14:98633428-98645099   |
| CLVS1          | chr8:61841481-61842166    |
| UBASH3A        | chr21:43823991-43824492   |
| DYRK2          | chr12:67875547-67879817   |
| HIF1A          | chr14:62127566-62130225   |
| KATNAL1        | chr13:30945731-30946479   |
| RICTOR         | chr5:39210452-39210953    |
| SNTB1          | chr8:121758806-121763531  |
| CCDC126        | chr7:23579501-23580002    |
| COG6           | chr13:40350062-40350563   |
| NTMT1          | chr9:131995958-132000794  |
| MDFIC          | chr7:114555658-114559052  |
| TMEM121        | chr14:106558483-106561534 |
| PIGC           | chr1:172343222-172343919  |
| ZSCAN5A        | chr19:56833015-56833516   |
| PKN2           | chr1:88225227-88225860    |
| DNAJB6         | chr7:157263491-157265940  |
| SLAMF8         | chr1:159795811-159797414  |
| MPC1           | chr6:166823398-166835284  |
| SKAP1          | chr17:46514030-46523305   |
| OLFML2B        | chr1:161898353-161900847  |
| DUSP4          | chr8:29347574-29348234    |
| ROBO1          | chr3:78850257-78852028    |
| KRR1           | chr12:76034215-76036420   |
| SMAD7          | chr18:46358828-46361999   |
| VSTM2L         | chr20:36451053-36451554   |
| GIMAP7         | chr7:150199020-150202863  |
| THEMIS         | chr6:128270966-128274645  |
| GPR151         | chr5:146129911-146134740  |
| ARG1           | chr6:131518490-131522758  |
| SIPA1L1        | chr14:71407416-71409986   |
| SLITRK1        | chr13:84708985-84712785   |
| SDK1           | chr7:3102080-3103604      |
| SCML4          | chr6:108050798-108063960  |

|           |                           |
|-----------|---------------------------|
| BTG4      | chr11:111401322-111404002 |
| GRID1     | chr10:88170377-88173821   |
| PLEKHF1   | chr19:30111690-30116269   |
| VRK1      | chr14:98084091-98088064   |
| SAMSN1    | chr21:16048245-16048893   |
| LGALS9B   | chr17:20202833-20205699   |
| CHRNA1    | chr2:175704947-175705573  |
| PRPF40B   | chr12:50055168-50059785   |
| EVI2B     | chr17:29640259-29640905   |
| CD79A     | chr19:42376070-42376783   |
| KCNE2     | chr21:35691547-35693150   |
| NR5A2     | chr1:200119686-200124971  |
| DISC1     | chr1:231746297-231751403  |
| INPP4A    | chr2:99079762-99082494    |
| KRBOX4    | chrX:45617985-45618486    |
| KRTAP12-4 | chr21:46076563-46079939   |
| RNF149    | chr2:101977127-101979470  |
| TNFSF11   | chr13:42970759-42971260   |
| PEAR1     | chr1:156839851-156841778  |
| TMEM121   | chr14:106961933-106965521 |
| NABP1     | chr2:192351234-192352778  |
| RASA1     | chr5:86375698-86378579    |
| CRHR2     | chr7:30777094-30779531    |
| C2orf40   | chr2:106542610-106547596  |
| IL10      | chr1:206929423-206933157  |
| N6AMT1    | chr21:30202914-30210545   |
| FAM187B   | chr19:35728949-35732975   |
| USP6NL    | chr10:11443178-11445797   |
| FAM110C   | chr2:175008-178326        |
| RNASEH2B  | chr13:51467246-51467747   |
| APCDD1    | chr18:10366757-10367258   |
| PKP4      | chr2:158750624-158757932  |
| ITGB6     | chr2:161085084-161085585  |
| KIAA1217  | chr10:24438713-24442149   |
| ADAMTS12  | chr5:33789365-33790031    |
| GIMAP6    | chr7:150362735-150363825  |
| CMTM8     | chr3:32154705-32157147    |
| LRRRC8D   | chr1:90184495-90185784    |
| COL3A1    | chr2:189678666-189679167  |
| SBK1      | chr16:28320033-28324335   |
| ITGAE     | chr17:3666276-3671862     |
| SUPT3H    | chr6:45769730-45770231    |
| CD3E      | chr11:118173022-118193003 |
| GPR12     | chr13:27294794-27296848   |
| NMT2      | chr10:15246604-15252584   |
| ATP6V1G3  | chr1:198578283-198585914  |
| SIRPA     | chr20:1664196-1668203     |
| CD70      | chr19:6651661-6656359     |
| ST3GAL1   | chr8:134626995-134631398  |
| DPPA4     | chr3:109523102-109528242  |
| TPRG1     | chr3:188634319-188635529  |
| FASLG     | chr1:172606192-172610972  |
| SLC20A1   | chr2:113387908-113390104  |
| WISP2     | chr20:43299712-43301515   |
| GAS7      | chr17:10150720-10151221   |
| PRKCQ     | chr10:6570013-6573620     |

|         |                          |
|---------|--------------------------|
| SLC22A3 | chr6:160880686-160884963 |
| VSTM2L  | chr20:36449171-36453215  |
| KIF26B  | chr1:245913747-245915905 |
| DNASE1  | chr16:3675104-3677959    |
| EFCAB10 | chr7:105488528-105493041 |
| GFI1    | chr1:93001485-93004833   |
| PDSS1   | chr10:27009449-27011763  |
| FAM172A | chr5:93908829-93916282   |
| B3GALT2 | chr1:193505956-193512515 |
| FGGY    | chr1:59395158-59395926   |
| AUTS2   | chr7:68741545-68742418   |
| C2orf40 | chr2:106710607-106711108 |
| DENND1B | chr1:197746373-197746874 |
| REL     | chr2:61045794-61047793   |
| GOLGA1  | chr9:127725966-127729939 |
| APCDD1  | chr18:10304242-10305701  |
| PCSK5   | chr9:77760489-77769313   |
| PDE7A   | chr8:66864600-66866727   |
| HINT1   | chr5:130403392-130406468 |
| PRG4    | chr1:186157655-186158156 |
| DYRK2   | chr12:67753128-67753629  |
| NEK7    | chr1:198159360-198160052 |
| MRPL1   | chr4:78746735-78750312   |
| KCNE2   | chr21:35704706-35712949  |
| TMEM128 | chr4:4267906-4273265     |
| APP     | chr21:27566992-27568491  |
| RASA1   | chr5:86377578-86378079   |
| ANKRD44 | chr2:198186440-198190386 |
| SIRPA   | chr20:1711451-1713510    |
| SP140L  | chr2:231181635-231185037 |
| HMGA1   | chr6:34149232-34151881   |
| ATP2B1  | chr12:90272120-90278238  |
| RGS9    | chr17:63173667-63179923  |
| LRTM1   | chr3:54908909-54910043   |
| AP4E1   | chr15:51116685-51119254  |
| BAI3    | chr6:69465757-69466258   |
| PRKACB  | chr1:84609279-84610525   |
| DPYD    | chr1:98854366-98854867   |
| ZEB1    | chr10:31389293-31391440  |
| ITGA4   | chr2:181988127-181993464 |
| FOXN2   | chr2:48319903-48320404   |
| FOXN2   | chr2:48315122-48318201   |
| TMEM75  | chr8:129586839-129590085 |
| RSG1    | chr1:16746405-16748515   |
| EFCAB1  | chr8:49319315-49323469   |
| PTPRU   | chr1:30180789-30184847   |
| TMC1    | chr9:75056470-75058230   |
| SYT16   | chr14:62604586-62607472  |
| IGLL5   | chr22:23094680-23103469  |
| BCOR    | chrX:39711662-39717937   |
| B3GALT1 | chr2:168887693-168888194 |
| MAP9    | chr4:156514644-156515145 |
| REPS1   | chr6:139446301-139448105 |
| FAM198B | chr4:158963136-158963870 |
| HINT1   | chr5:130405856-130406357 |
| TAB2    | chr6:149357201-149357702 |

|          |                           |
|----------|---------------------------|
| ABCD2    | chr12:40075968-40078098   |
| PALLD    | chr4:169552261-169554306  |
| SPOCK2   | chr10:73843915-73844416   |
| MAF      | chr16:79311186-79314495   |
| SFMBT2   | chr10:7526666-7527451     |
| TRPS1    | chr8:117435915-117436416  |
| NOX4     | chr11:89190002-89193520   |
| GALM     | chr2:38908095-38912823    |
| SLC14A1  | chr18:43265152-43269676   |
| MAN2A1   | chr5:109190887-109196636  |
| SYNCRIP  | chr6:86377272-86381184    |
| ICA1     | chr7:8163860-8192721      |
| SGIP1    | chr1:66961461-66961962    |
| RAN      | chr12:131351867-131354112 |
| STK17B   | chr2:197063135-197067844  |
| PTGFR    | chr1:78805372-78805873    |
| CTSO     | chr4:157219875-157220376  |
| CRMP1    | chr4:6178808-6186584      |
| TUBGCP5  | chr15:22481740-22485082   |
| THEMIS   | chr6:128573821-128574322  |
| STK38L   | chr12:27332343-27332844   |
| SYT2     | chr1:202597054-202598713  |
| ZNF80    | chr3:114003674-114005983  |
| CALD1    | chr7:134353049-134355968  |
| APCDD1   | chr18:10251872-10254935   |
| PAPPA    | chr9:118376666-118379982  |
| CDK6     | chr7:92534127-92534628    |
| TKTL2    | chr4:164583040-164589490  |
| SEPP1    | chr5:42985030-42985531    |
| LY9      | chr1:160765956-160766917  |
| HBS1L    | chr6:135448736-135451339  |
| MEX3B    | chr15:82374429-82374930   |
| PZP      | chr12:9515492-9519753     |
| TSHZ2    | chr20:51022194-51024690   |
| PRKCQ    | chr10:6583655-6587860     |
| CAB39    | chr2:231466290-231469334  |
| THEMIS   | chr6:128253820-128257185  |
| ANKRD44  | chr2:198190918-198194067  |
| ADAM12   | chr10:127843151-127843785 |
| GFPT1    | chr2:69498992-69499635    |
| NDNF     | chr4:122109736-122114413  |
| TDO2     | chr4:156820143-156823804  |
| FMN2     | chr1:239880776-239885688  |
| SEMA4D   | chr9:92033554-92034055    |
| NONE     | chr3:78785068-78788022    |
| NT5DC4   | chr2:113463007-113468033  |
| RSBN1    | chr1:114402798-114403299  |
| F2RL1    | chr5:76026117-76031015    |
| RAP1GDS1 | chr4:99367337-99367838    |
| THEMIS   | chr6:128222270-128222902  |
| CCR2     | chr3:46317689-46345641    |
| HSPBAP1  | chr3:122477773-122478274  |
| CD96     | chr3:111259920-111270842  |
| FABP4    | chr8:82411709-82412381    |
| ST3GAL1  | chr8:135053713-135057365  |
| DCN      | chr12:92449067-92451171   |

|          |                           |
|----------|---------------------------|
| SYT6     | chr1:114882886-114886275  |
| TNN      | chr1:175177259-175181143  |
| NRIP1    | chr21:16885661-16887834   |
| TOX2     | chr20:42379128-42381600   |
| DIO2     | chr14:81395529-81399050   |
| NOX4     | chr11:89191216-89192511   |
| LYPLAL1  | chr1:219596146-219596647  |
| DYRK2    | chr12:67908162-67911718   |
| PRKCQ    | chr10:6514443-6517764     |
| EFCC1    | chr3:128641201-128643219  |
| APOBEC3H | chr22:39510586-39515064   |
| TGFB3    | chr14:76341580-76347447   |
| C7orf10  | chr7:40337374-40337875    |
| CREG1    | chr1:167586598-167587099  |
| KCNA2    | chr1:111178182-111178836  |
| TGFB3    | chr14:76298257-76298885   |
| MPP6     | chr7:24494764-24497580    |
| TNFSF11  | chr13:42927196-42931577   |
| EMR1     | chr19:6801325-6803162     |
| KCMF1    | chr2:85173145-85173915    |
| PDSS1    | chr10:26768943-26769444   |
| TAB2     | chr6:149366464-149368223  |
| TLDC1    | chr16:84551289-84553814   |
| FILIP1L  | chr3:99748318-99754169    |
| CLIC6    | chr21:36135507-36136225   |
| SOX21    | chr13:95920541-95921042   |
| CD247    | chr1:167478905-167488722  |
| IQCA1    | chr2:237450101-237450902  |
| ZNF267   | chr16:31880100-31881588   |
| PRKCQ    | chr10:7086540-7090299     |
| FRS2     | chr12:69798515-69799150   |
| NTM      | chr11:132226816-132229261 |
| SLC4A7   | chr3:27753616-27764399    |
| ADAM12   | chr10:127933029-127933710 |
| ITGA1    | chr5:52038357-52042202    |
| ZBTB20   | chr3:114882015-114885290  |
| SFMBT2   | chr10:7548547-7551136     |
| GJB6     | chr13:21002770-21003271   |
| TTLL7    | chr1:83568798-83569299    |
| PARD3B   | chr2:204856555-204860689  |
| GTF3C4   | chr9:135523378-135523879  |
| TCF4     | chr18:53456541-53458263   |
| ITGAE    | chr17:3673225-3674837     |
| APPL2    | chr12:106377918-106378593 |
| JAG1     | chr20:11125205-11125706   |
| MUC22    | chr6:30978003-30978504    |
| SAMHD1   | chr20:35595144-35604869   |
| S1PR3    | chr9:91651396-91651897    |
| PTPRC    | chr1:198904810-198906714  |
| SLAMF6   | chr1:160545538-160546039  |
| TRIB1    | chr8:126537300-126538621  |
| EFCAB1   | chr8:49318285-49323865    |
| NFATC1   | chr18:76915989-76918459   |
| BPGM     | chr7:134309965-134310466  |
| DDI1     | chr11:103668213-103668714 |
| LRRC16A  | chr6:24947481-24958018    |



|          |                          |
|----------|--------------------------|
| SLC39A10 | chr2:196474756-196475425 |
| C3orf80  | chr3:159887144-159887645 |
| GPR15    | chr3:98266577-98288499   |
| YIPF5    | chr5:143568949-143569450 |
| ERG      | chr21:40138686-40139187  |
| LANCL2   | chr7:55374643-55378677   |
| ADRB2    | chr5:148226158-148231384 |
| SEC13    | chr3:10436270-10439245   |
| LRRRC8D  | chr1:90203975-90207236   |
| CREG2    | chr2:102012128-102012863 |
| GREM1    | chr15:33120156-33120657  |
| ELF5     | chr11:34634115-34637467  |
| SFMBT2   | chr10:7512255-7516059    |
| SUPT3H   | chr6:45587952-45588453   |
| HUWE1    | chrX:53740211-53745674   |
| SNTB1    | chr8:121791451-121792102 |
| PRKCQ    | chr10:7070605-7071106    |
| DCBLD2   | chr3:99114706-99116199   |
| TSHZ2    | chr20:51018512-51029692  |
| TNRC6B   | chr22:40294686-40318612  |
| THUMPD3  | chr3:9321402-9323525     |
| PXDNL    | chr8:52090586-52091431   |
| DZIP3    | chr3:108320966-108323738 |
| SRSF7    | chr2:38935176-38938378   |
| GOLIM4   | chr3:167657646-167658275 |
| FBXO30   | chr6:146185909-146189673 |
| ZNF157   | chrX:47220959-47222417   |
| PDSS1    | chr10:26734030-26739969  |
| SKAP1    | chr17:46587568-46589437  |
| GORAB    | chr1:170258877-170262648 |
| CSK      | chr15:75072654-75073315  |
| PLGLB1   | chr2:87795239-87795740   |
| PRF1     | chr10:72422305-72423276  |
| LAIR1    | chr19:54875996-54876756  |
| GORAB    | chr1:170414668-170415169 |
| EDN2     | chr1:42148848-42149349   |
| HKDC1    | chr10:70959829-70966597  |
| CYFIP2   | chr5:156604703-156627524 |
| DRD3     | chr3:113948946-113955155 |
| C16orf54 | chr16:29748907-29751133  |
| LRRRC16A | chr6:25036895-25037563   |
| MTAP     | chr9:21575499-21580783   |
| CAP1     | chr1:40524764-40526064   |
| POPDC3   | chr6:105626636-105628410 |
| RIMS3    | chr1:41093278-41096763   |
| AIG1     | chr6:143497136-143497637 |
| TSKU     | chr11:76411936-76412437  |
| NTPCR    | chr1:233056692-233062258 |
| POMZP3   | chr7:76435671-76436172   |
| APCDD1   | chr18:10376684-10380132  |
| SIGLEC9  | chr19:51625920-51628840  |
| CDH11    | chr16:64474636-64475137  |
| DDR2     | chr1:162598867-162599368 |
| CSNK1A1L | chr13:37956069-37957038  |
| ZFP57    | chr6:29676934-29677435   |
| RIN2     | chr20:19476493-19478702  |

|           |                           |
|-----------|---------------------------|
| RYBP      | chr3:72804907-72807455    |
| TAF1B     | chr2:9794554-9797685      |
| CACHD1    | chr1:64758190-64758691    |
| SLAMF1    | chr1:160677037-160677538  |
| ZFAT      | chr8:136220083-136226600  |
| GNAQ      | chr9:80815241-80817253    |
| PIEZO2    | chr18:11516814-11517315   |
| LY9       | chr1:160708062-160721378  |
| BCL11B    | chr14:99449059-99451867   |
| KIAA1217  | chr10:24438765-24442963   |
| SPOCD1    | chr1:32291288-32294170    |
| SAP30L    | chr5:153577881-153578382  |
| RTKN2     | chr10:63988622-64005863   |
| LHFPL2    | chr5:78077133-78080357    |
| ACYP2     | chr2:54220494-54224536    |
| CCR2      | chr3:46395443-46396241    |
| FNIP1     | chr5:131309769-131312044  |
| PMEPA1    | chr20:56501586-56504345   |
| RUNX2     | chr6:44615198-44615699    |
| FOXP1     | chr3:71544868-71545974    |
| NONE      | chr14:98653581-98654082   |
| KIAA0020  | chr9:3397252-3399095      |
| HSF2      | chr6:122205356-122205857  |
| TBC1D31   | chr8:124107482-124109490  |
| RHEB      | chr7:151464792-151467889  |
| APCDD1    | chr18:10365011-10365512   |
| HBP1      | chr7:106765890-106768255  |
| TSPAN3    | chr15:77558482-77561022   |
| SEMA4D    | chr9:92147733-92155281    |
| GRIA1     | chr5:153051399-153051900  |
| SOX4      | chr6:21263567-21266919    |
| TESPA1    | chr12:55370489-55380382   |
| DUSP4     | chr8:29636679-29637830    |
| CACNG3    | chr16:23958244-23964833   |
| MAPK6     | chr15:52336797-52340381   |
| MAN1B1    | chr9:139988833-139992066  |
| CMTM7     | chr3:32412144-32414527    |
| DNMT3A    | chr2:25599916-25600417    |
| LGALS9B   | chr17:20203786-20204428   |
| AIFM2     | chr10:71851519-71853726   |
| OLIG3     | chr6:138087607-138090686  |
| SORL1     | chr11:121351678-121355767 |
| FAM150B   | chr2:317228-318893        |
| CALML3    | chr10:5605358-5608385     |
| SEMA4D    | chr9:92133045-92147246    |
| MGAT5     | chr2:134990169-134991830  |
| FOXB1     | chr15:60095179-60096821   |
| CCR2      | chr3:46342823-46343532    |
| C10orf112 | chr10:19025467-19029071   |
| RAB11FIP4 | chr17:29655712-29656655   |
| CUL3      | chr2:225806551-225825252  |
| MYO5C     | chr15:52772711-52777375   |
| RIN3      | chr14:93044282-93044783   |
| MBNL1     | chr3:151912737-151913238  |
| ANTXR2    | chr4:81058515-81062386    |
| MAP3K15   | chrX:19822153-19824380    |

|          |                           |
|----------|---------------------------|
| STARD4   | chr5:111265718-111266543  |
| ST8SIA1  | chr12:22382892-22383393   |
| GJB1     | chrX:70415403-70418708    |
| GPR174   | chrX:78350567-78354479    |
| KCNMB2   | chr3:177358634-177363051  |
| MARCH10  | chr17:60867817-60868318   |
| IL17B    | chr5:148777177-148777678  |
| COPS8    | chr2:238033328-238033829  |
| PARD3B   | chr2:204815992-204816621  |
| SUPT3H   | chr6:45622844-45625012    |
| SLC7A5   | chr16:87927105-87932951   |
| LRP3     | chr19:33650672-33652484   |
| PTPRU    | chr1:30180390-30186380    |
| RAP1GDS1 | chr4:99366494-99370927    |
| COL3A1   | chr2:189461995-189468712  |
| RHBDD1   | chr2:227758460-227759283  |
| GCNT1    | chr9:79191205-79191875    |
| NOX4     | chr11:89112191-89117537   |
| COL8A1   | chr3:99375000-99379333    |
| FOXP1    | chr3:70861310-70862418    |
| GINS4    | chr8:41371265-41375391    |
| KCNA3    | chr1:111330223-111330724  |
| STARD4   | chr5:111289273-111289774  |
| SMYD3    | chr1:246131984-246132485  |
| DOK1     | chr2:74803140-74804946    |
| WNT2     | chr7:116923740-116924241  |
| TREH     | chr11:118568930-118571992 |
| RNASEH2B | chr13:50893145-50895275   |
| MMADHC   | chr2:150505735-150506236  |
| PLXNC1   | chr12:94675719-94677825   |
| MFGE8    | chr15:89610675-89611864   |
| NEBL     | chr10:20911722-20914814   |
| DYRK2    | chr12:67751187-67752167   |
| CLECL1   | chr12:9889519-9890237     |
| FCN2     | chr9:137685817-137716331  |
| PET112   | chr4:152999756-153002968  |
| PDE7A    | chr8:66862735-66863952    |
| CCL4     | chr17:34430188-34436258   |
| RAPGEF6  | chr5:130881032-130886680  |
| L3MBTL3  | chr6:130348296-130351378  |
| MDFIC    | chr7:114570181-114572098  |
| CHMP7    | chr8:23087720-23089226    |
| TMPRSS13 | chr11:117829371-117831767 |
| GALC     | chr14:87614531-87615918   |
| SOX4     | chr6:21438810-21439311    |
| SEC14L1  | chr17:74992210-74996162   |
| DOK1     | chr2:74801675-74802176    |
| AHR      | chr7:17617640-17625978    |
| RAPGEF6  | chr5:130849151-130851588  |
| CHMP4B   | chr20:32391305-32392276   |
| DUSP6    | chr12:89861374-89864304   |
| BRD9     | chr5:983609-984422        |
| ANKRD62  | chr18:12047787-12050812   |
| ZRANB2   | chr1:72121826-72127879    |
| BICD1    | chr12:31956427-31958087   |
| REPS1    | chr6:139446019-139451165  |

|            |                           |
|------------|---------------------------|
| ZNF513     | chr2:27612606-27616132    |
| ST20-MTHFS | chr15:80258383-80264797   |
| CP         | chr3:148994315-148996171  |
| CSNK1A1L   | chr13:38019816-38022674   |
| FZD2       | chr17:42634181-42634814   |
| CABYR      | chr18:21580563-21581064   |
| ALPK2      | chr18:56281077-56284248   |
| CD226      | chr18:67611331-67618218   |
| ZNF618     | chr9:116430719-116431220  |
| LRTM1      | chr3:55032746-55034644    |
| SRPK2      | chr7:105086518-105091217  |
| RGS9       | chr17:63169850-63170351   |
| CCR3       | chr3:46254729-46255230    |
| CUL3       | chr2:225813432-225813933  |
| ADAM12     | chr10:128084061-128087414 |
| ANXA4      | chr2:69915909-69923538    |
| KCMF1      | chr2:85165146-85168639    |
| FOXL1      | chr16:86618505-86620602   |
| MIA2       | chr14:39701863-39702364   |
| TNFSF18    | chr1:173173327-173177058  |
| SYNC       | chr1:33262703-33267548    |
| KIFC3      | chr16:57868201-57870374   |
| FBLN7      | chr2:112938742-112942226  |
| OLFML2B    | chr1:161898334-161905305  |
| MAP9       | chr4:156548997-156552451  |
| CHST11     | chr12:104878603-104879104 |
| LAMB1      | chr7:107718443-107719072  |
| RPL11      | chr1:23938055-23942350    |
| EFHC1      | chr6:52253048-52260113    |
| SPP2       | chr2:235072022-235076018  |
| C1orf95    | chr1:226612141-226614039  |
| COL12A1    | chr6:75287276-75289234    |
| NROB1      | chrX:30592656-30597088    |
| GUCY1A2    | chr11:106913421-106914104 |
| SFRP2      | chr4:154719976-154720477  |
| APLF       | chr2:68649959-68657731    |
| LMNB1      | chr5:126083122-126085059  |
| GLCC1      | chr7:8053970-8055690      |
| ETS1       | chr11:128397240-128397946 |
| C9orf72    | chr9:27785153-27785654    |
| MAN1B1     | chr9:139990474-139990975  |
| CSNK1A1L   | chr13:37743153-37743812   |
| APOO       | chrX:23971831-23972332    |
| RTKN2      | chr10:63990203-63990704   |
| APCDD1     | chr18:10070264-10070765   |
| S1PR1      | chr1:101748523-101750811  |
| CHAC1      | chr15:41277482-41278211   |
| SDHA       | chr5:168908-169609        |
| PRF1       | chr10:72410868-72417625   |
| DUSP10     | chr1:222097493-222097994  |
| TGM2       | chr20:36903406-36905253   |
| KCNE2      | chr21:35653238-35653739   |
| CD70       | chr19:6575766-6578871     |
| PDE7A      | chr8:66855761-66856262    |
| COX7A2L    | chr2:42522259-42527406    |
| NREP       | chr5:111332359-111335983  |

|          |                           |
|----------|---------------------------|
| UNC50    | chr2:99269346-99282885    |
| NONE     | chr2:146450155-146450656  |
| LRRC16A  | chr6:25024865-25029011    |
| PTPRO    | chr12:15696863-15701432   |
| HSF2     | chr6:122202970-122203471  |
| ZRSR2    | chrX:15799263-15801502    |
| HSPA8    | chr11:122956461-122959996 |
| PRDM1    | chr6:106089881-106100630  |
| ACKR3    | chr2:237443142-237447768  |
| FN1      | chr2:216581377-216584378  |
| EP300    | chr22:41371596-41372097   |
| SOX4     | chr6:21634204-21635497    |
| FOXI1    | chr5:169122694-169123195  |
| ZNF81    | chrX:47566094-47567689    |
| PTGER4   | chr5:39755442-39756142    |
| FCN2     | chr9:137708067-137709938  |
| RTKN2    | chr10:63996256-63996757   |
| FRMD4A   | chr10:14049803-14050834   |
| ORC3     | chr6:88355078-88355579    |
| FBXW7    | chr4:153473287-153478510  |
| IKZF3    | chr17:37967736-37972160   |
| NPIP3    | chr16:21550269-21553486   |
| AHI1     | chr6:135679767-135680268  |
| ZNF81    | chrX:47566239-47568023    |
| ADO      | chr10:64376485-64381832   |
| B3GALT2  | chr1:193425239-193433915  |
| KLHL42   | chr12:27974000-27976085   |
| COL6A3   | chr2:238209083-238210134  |
| HAAO     | chr2:43114011-43116370    |
| SMAD1    | chr4:146219434-146223218  |
| GZMB     | chr14:25161685-25165346   |
| ASMTL    | chrX:1619728-1620229      |
| ARTN     | chr1:44261180-44262993    |
| KCNT2    | chr1:195926753-195928648  |
| C1orf198 | chr1:231107270-231110762  |
| ADAMTS5  | chr21:28640489-28641405   |
| AKTIP    | chr16:53634382-53635191   |
| ZNHIT6   | chr1:86618400-86623077    |
| CTLA4    | chr2:204717570-204740329  |
| ISL1     | chr5:50147638-50153531    |
| GRAMD1C  | chr3:113547530-113550794  |
| NDNF     | chr4:122073131-122078849  |
| SLC16A1  | chr1:113588707-113590588  |
| KCNE2    | chr21:35705580-35706365   |
| ATP1B3   | chr3:141530473-141530974  |
| FNDC3A   | chr13:49379051-49379997   |
| SERPINB9 | chr6:2936620-2938475      |
| FAM198B  | chr4:158971566-158974785  |
| CRYBA4   | chr22:27529921-27531264   |
| ASB13    | chr10:5637496-5638558     |
| EXOC2    | chr6:1285806-1287824      |
| BACH1    | chr21:30820912-30823317   |
| CCDC12   | chr3:47078901-47080714    |
| METTL20  | chr12:31838801-31841066   |
| KANSL3   | chr2:97258889-97263356    |
| SPTLC1   | chr9:94942389-94944339    |

|          |                           |
|----------|---------------------------|
| HRASLS2  | chr11:63318524-63322482   |
| TPST2    | chr22:27005525-27007284   |
| PARD3B   | chr2:204797118-204809378  |
| PRF1     | chr10:72335146-72340308   |
| NEK7     | chr1:198154501-198163540  |
| ITGAL    | chr16:30467892-30471399   |
| CHRNA9   | chr4:40266392-40268748    |
| MAF      | chr16:79305161-79306750   |
| NUAK2    | chr1:205267211-205268418  |
| CAST     | chr5:95872397-95874785    |
| KCNJ2    | chr17:68402021-68402522   |
| CCR8     | chr3:39335157-39337960    |
| UBL3     | chr13:30508124-30513593   |
| WBP2NL   | chr22:42426418-42428279   |
| PTPRC    | chr1:198636899-198637400  |
| ADAMTS2  | chr5:178729585-178732387  |
| LY6H     | chr8:144272207-144273414  |
| GLIPR1   | chr12:75864855-75867124   |
| CLLU1    | chr12:92601209-92604681   |
| RBL2     | chr16:53482583-53495406   |
| AMN      | chr14:103270957-103275162 |
| ADO      | chr10:64396684-64398727   |
| GXYLT1   | chr12:42490672-42492788   |
| PIGC     | chr1:172323391-172323892  |
| CHST2    | chr3:142888556-142891052  |
| SLAMF1   | chr1:160678260-160678920  |
| P2RX5    | chr17:3613256-3616851     |
| TAB2     | chr6:149530548-149537615  |
| PCCA     | chr13:100863151-100863652 |
| PLCXD2   | chr3:111333706-111337219  |
| CDK20    | chr9:90937264-90938963    |
| PPAPDC3  | chr9:134053288-134057519  |
| KIF26B   | chr1:245425288-245428471  |
| PTTG1IP  | chr21:46298633-46302403   |
| SLC28A3  | chr9:86907369-86909135    |
| ACSL5    | chr10:114128357-114130589 |
| SETBP1   | chr18:41515317-41516272   |
| GRID1    | chr10:88170037-88174476   |
| YWHAH    | chr22:32312579-32314626   |
| FMO6P    | chr1:171086345-171086846  |
| CSNK1A1L | chr13:37708202-37709383   |
| TMEM163  | chr2:135425915-135429812  |
| MXRA5    | chrX:3181319-3181820      |
| COL12A1  | chr6:75381392-75382084    |
| PHF21A   | chr11:46268446-46272028   |
| SELP     | chr1:169648500-169681623  |
| BTBD9    | chr6:38355339-38355840    |
| SMAD7    | chr18:46392966-46396767   |
| DTHD1    | chr4:36255828-36259347    |
| ARHGAP21 | chr10:25182505-25184729   |
| LRIG3    | chr12:58894581-58899699   |
| PDE1A    | chr2:183363987-183364846  |
| EDNRA    | chr4:148044549-148045222  |
| CRIM1    | chr2:36466870-36469468    |
| TTLL7    | chr1:84154878-84156885    |
| CRTAM    | chr11:122726449-122728538 |

|            |                           |
|------------|---------------------------|
| BCKDHB     | chr6:80926808-80927582    |
| ETS1       | chr11:127905087-127912901 |
| PIGK       | chr1:77737107-77738299    |
| C7orf10    | chr7:40259859-40263266    |
| ADAM12     | chr10:127837312-127837813 |
| ST8SIA4    | chr5:100187790-100191537  |
| DERL3      | chr22:24183333-24183834   |
| TMEM156    | chr4:39028702-39035663    |
| DIABLO     | chr12:122727077-122732063 |
| BCL6       | chr3:187710857-187713427  |
| RUNX1      | chr21:36883650-36884949   |
| TMEM75     | chr8:129553851-129554352  |
| MTF2       | chr1:93437189-93448413    |
| AOAH       | chr7:36814443-36821530    |
| UBL3       | chr13:30528430-30528931   |
| RBM8A      | chr1:145500860-145503901  |
| PARN       | chr16:14602593-14606595   |
| PRDM1      | chr6:105956780-105959583  |
| FUT10      | chr8:32918914-32919415    |
| FOXP1      | chr3:71550666-71556241    |
| WIF1       | chr12:65549507-65551461   |
| DTNB       | chr2:26014955-26022324    |
| SNTB1      | chr8:122100923-122101424  |
| TIGIT      | chr3:114023033-114030125  |
| TRAF5      | chr1:211525154-211528889  |
| TDRD3      | chr13:61001070-61002873   |
| FZD1       | chr7:90793155-90795995    |
| PARVG      | chr22:44597790-44598291   |
| CCDC89     | chr11:85411610-85412111   |
| SLC41A2    | chr12:105430450-105433891 |
| ARHGAP24   | chr4:86623821-86624322    |
| TRIB2      | chr2:12267013-12268605    |
| BLOC1S2    | chr10:102065611-102068279 |
| TAB2       | chr6:149553685-149555984  |
| RGCC       | chr13:42079881-42080382   |
| DUSP4      | chr8:29223880-29225318    |
| CD247      | chr1:167414539-167418688  |
| CHRNA9     | chr4:40237273-40250444    |
| FAM9C      | chrX:13068166-13072858    |
| RUNX1      | chr21:36442384-36447145   |
| ENTPD6     | chr20:25070438-25073193   |
| MTX3       | chr5:79227603-79236158    |
| RTKN2      | chr10:63994252-63994753   |
| GRHPR      | chr9:37144575-37147653    |
| SALL4      | chr20:50647583-50649524   |
| BCL2L14    | chr12:12111144-12111645   |
| ZPLD1      | chr3:101655124-101655973  |
| SIAH1      | chr16:48491610-48493329   |
| IFI44      | chr1:79115590-79116240    |
| NONE       | chr12:127653587-127654263 |
| RARB       | chr3:25502386-25502887    |
| ZBTB38     | chr3:141025034-141027838  |
| RGS1       | chr1:192499414-192499915  |
| TAB2       | chr6:149414489-149417552  |
| MAP3K9     | chr14:71338304-71339812   |
| CSGALNACT1 | chr8:19573194-19579059    |

|          |                           |
|----------|---------------------------|
| RASGEF1A | chr10:43794008-43796667   |
| TMEM132C | chr12:128139616-128142321 |
| CDH17    | chr8:95176472-95178961    |
| RORA     | chr15:61011517-61015108   |
| AHR      | chr7:17571530-17573830    |
| PCSK5    | chr9:78416032-78419995    |
| RGS18    | chr1:192127624-192128125  |
| NTM      | chr11:131934351-131934852 |
| GATA3    | chr10:8285306-8288680     |
| NONE     | chr9:25710547-25711048    |
| ZNHIT6   | chr1:86620223-86621494    |
| CRTAM    | chr11:122565176-122572876 |
| LYZL2    | chr10:31026092-31026593   |
| LRIG3    | chr12:58895803-58896304   |
| SLC39A10 | chr2:196512672-196516809  |
| CKMT2    | chr5:80301838-80305345    |
| ETV3L    | chr1:157075195-157075696  |
| ADAMTS12 | chr5:33690367-33692035    |
| FOXL1    | chr16:86618302-86620805   |
| PRKCQ    | chr10:6532283-6538050     |
| GPR149   | chr3:154782910-154783411  |
| SUPT3H   | chr6:45416613-45417114    |
| NT5DC4   | chr2:113455666-113460554  |
| GPHN     | chr14:66392553-66396973   |
| GIMAP4   | chr7:150251621-150255945  |
| GPR88    | chr1:100918875-100919376  |
| PRSS1    | chr7:142045248-142045749  |
| PDGFD    | chr11:104746604-104749060 |
| SNX13    | chr7:17694083-17695883    |
| IQGAP1   | chr15:90918636-90922483   |
| SLC38A11 | chr2:165837611-165838112  |
| NONE     | chr14:98459238-98462765   |
| ADAM7    | chr8:24240544-24245901    |
| SH2D1A   | chrX:123474950-123483691  |
| MAPKAP1  | chr9:128283378-128285411  |
| KIF26B   | chr1:245949696-245951042  |
| CD70     | chr19:6640219-6642891     |
| SAV1     | chr14:51278564-51282023   |
| STARD3NL | chr7:38388410-38405860    |
| SLC1A4   | chr2:65033985-65035232    |
| PARP14   | chr3:122328141-122329327  |
| L3MBTL3  | chr6:130504279-130506291  |
| ATP6V1G3 | chr1:198503297-198504999  |
| ITGA1    | chr5:52039857-52040358    |
| SETBP1   | chr18:41468254-41469058   |
| CAMK4    | chr5:110558796-110574556  |
| GNAO1    | chr16:56293689-56298363   |
| TLK1     | chr2:172066855-172068571  |
| AKR1E2   | chr10:4022066-4022567     |
| TCF4     | chr18:53455671-53458744   |
| MLN      | chr6:33872639-33873140    |
| THBS1    | chr15:39188201-39188843   |
| TTN      | chr2:179910584-179915140  |
| FAM198B  | chr4:158971443-158974766  |
| TMEM26   | chr10:63512510-63513011   |
| BCL2L1   | chr20:30314941-30315751   |



|           |                           |
|-----------|---------------------------|
| ADORA3    | chr1:112048852-112049353  |
| TLK1      | chr2:172179098-172185108  |
| N6AMT1    | chr21:29836910-29837538   |
| ZBED2     | chr3:111313156-111313657  |
| UTS2      | chr1:7995498-8003823      |
| DCN       | chr12:91742056-91743501   |
| SGMS1     | chr10:52566804-52569360   |
| MAEA      | chr4:1260693-1262289      |
| APP       | chr21:27566260-27569201   |
| PRL       | chr6:22326421-22329936    |
| BTN3A2    | chr6:26360629-26362388    |
| VSTM1     | chr19:54538025-54540016   |
| PTGFRN    | chr1:117336939-117337440  |
| KRTAP19-8 | chr21:32815036-32820831   |
| MEDAG     | chr13:31347445-31349654   |
| OR4E2     | chr14:22538330-22540384   |
| SLMO2     | chr20:57694968-57700405   |
| SUPT3H    | chr6:45461561-45465275    |
| TGFB3     | chr14:76307758-76310189   |
| CWC15     | chr11:94642044-94645128   |
| DCT       | chr13:94964199-94964700   |
| CAMK2D    | chr4:114658843-114659344  |
| COPB2     | chr3:139026423-139028847  |
| PPAPDC1A  | chr10:122182587-122183225 |
| ARHGAP15  | chr2:144003584-144022067  |
| AOAH      | chr7:37353944-37356472    |
| IKZF3     | chr17:37972339-37978970   |
| AMIGO2    | chr12:47582484-47588729   |
| BCKDHB    | chr6:81135390-81136228    |
| KRTAP10-9 | chr21:46037795-46040003   |
| PRDM1     | chr6:105998104-106001982  |
| VIM       | chr10:17251622-17252594   |
| PALD1     | chr10:72251902-72256606   |
| PALLD     | chr4:169672033-169674950  |
| ZFH3      | chr16:73188403-73188904   |
| COL12A1   | chr6:75286630-75289960    |
| EPYC      | chr12:91434374-91435032   |
| PRF1      | chr10:72421078-72425900   |
| CRMP1     | chr4:6199042-6203092      |
| TRIB1     | chr8:126536962-126541939  |
| CCR3      | chr3:46253765-46256843    |
| IL18R1    | chr2:102953422-102953923  |
| ZNF507    | chr19:31867898-31870429   |
| SYNC      | chr1:33265477-33265978    |
| PITPNB    | chr22:28534500-28544558   |
| IL20RB    | chr3:136602483-136606781  |
| BTBD9     | chr6:38229506-38230257    |
| SPON2     | chr4:1194193-1199050      |
| SIGLEC10  | chr19:51943246-51945891   |
| PLAGL1    | chr6:144375663-144377688  |
| CCDC66    | chr3:56758047-56761482    |
| SUPT3H    | chr6:45583905-45588871    |
| VAV3      | chr1:108367665-108374118  |
| ASF1A     | chr6:119116980-119118230  |
| RPL11     | chr1:23926854-23930250    |
| PRKCQ     | chr10:6965816-6972590     |

|          |                           |
|----------|---------------------------|
| SNTB1    | chr8:121785049-121794691  |
| C11orf87 | chr11:108740812-108742226 |
| BCL2L1   | chr20:30314480-30316371   |
| TSHZ2    | chr20:51108653-51111657   |
| TREH     | chr11:118569609-118570110 |
| SLCO6A1  | chr5:102157611-102160715  |
| HIVEP2   | chr6:143220989-143229722  |
| RHOBTB1  | chr10:63156529-63158398   |
| AOAH     | chr7:36774790-36778078    |
| DAD1     | chr14:22855905-22858918   |
| SMYD3    | chr1:246018902-246025413  |
| MMP3     | chr11:102752050-102754710 |
| AAK1     | chr2:69922085-69922832    |
| TTLL5    | chr14:76181747-76182565   |
| AKAP17A  | chrX:1671403-1675044      |
| PLSCR1   | chr3:146683396-146692577  |
| BLZF1    | chr1:169332609-169333110  |
| SEMA3C   | chr7:81038840-81039717    |
| INSC     | chr11:15178875-15180281   |
| COL3A1   | chr2:189757170-189759529  |
| RGS1     | chr1:192496634-192500988  |
| MAP3K15  | chrX:19760952-19772098    |
| PRG4     | chr1:185785717-185787328  |
| UBL3     | chr13:30692708-30693710   |
| SLC12A8  | chr3:125028919-125030773  |
| BOD1L1   | chr4:13892871-13895087    |
| APCDD1   | chr18:10213099-10214465   |
| AHR      | chr7:17499904-17509150    |
| NOL11    | chr17:65444653-65453272   |
| GLS      | chr2:191703131-191703784  |
| URI1     | chr19:30321172-30324226   |
| COL6A3   | chr2:238192615-238193116  |
| ADAMTS2  | chr5:178913521-178914022  |
| FN1      | chr2:216523491-216525240  |
| COL3A1   | chr2:189766650-189768519  |
| COL6A3   | chr2:238173454-238174161  |
| CSNK1A1L | chr13:37767525-37768026   |
| RIN3     | chr14:93029280-93030725   |
| FILIP1L  | chr3:99751882-99752759    |
| ELL2     | chr5:95481548-95482339    |
| PIM1     | chr6:37104628-37105945    |
| CLUU1    | chr12:92602854-92603959   |
| SPATS2L  | chr2:200903686-200904187  |
| ITGAL    | chr16:30484117-30484618   |
| IRF5     | chr7:128580333-128581232  |
| CDK5R1   | chr17:30895460-30895961   |
| SALL4    | chr20:50476394-50477816   |
| SKAP1    | chr17:46561500-46562205   |
| ID2      | chr2:8226662-8227163      |
| ASIC5    | chr4:156811047-156811959  |
| RUNX1    | chr21:36724851-36726049   |
| AGPS     | chr2:178294170-178294671  |
| STARD4   | chr5:111283166-111285644  |
| LRRC16A  | chr6:24951382-24951883    |
| SIRPA    | chr20:1650364-1650865     |
| PSIP1    | chr9:15725315-15726023    |

|          |                           |
|----------|---------------------------|
| THBS1    | chr15:39006601-39007234   |
| ATP6V1G3 | chr1:198466677-198467178  |
| SMYD3    | chr1:246036909-246038402  |
| EXOC2    | chr6:1145629-1146306      |
| FOSL2    | chr2:28351757-28352258    |
| CDH26    | chr20:58630773-58631450   |
| FOXP2    | chr7:113687276-113688827  |
| PCSK5    | chr9:78054857-78055358    |
| COL3A1   | chr2:189591710-189592555  |
| ZNF396   | chr18:33018126-33018627   |
| RGS1     | chr1:192513949-192514450  |
| AP4E1    | chr15:51118472-51118973   |
| SNX13    | chr7:17701643-17703028    |
| ARHGAP28 | chr18:6876936-6877842     |
| PAG1     | chr8:82139216-82139717    |
| TRIB2    | chr2:12997082-12997717    |
| PLXDC1   | chr17:37294389-37296512   |
| DAO      | chr12:109299781-109300282 |
| PTPRC    | chr1:198898995-198899657  |
| NABP1    | chr2:192501703-192503615  |
| PRDM1    | chr6:106606937-106607438  |
| RSL24D1  | chr15:55545356-55545857   |
| SMIM15   | chr5:60614726-60616475    |
| CSNK1A1L | chr13:38112742-38114065   |
| FN1      | chr2:216525884-216526589  |
| THBS2    | chr6:169433529-169437138  |
| VKORC1L1 | chr7:65263637-65264138    |
| CD48     | chr1:160680726-160681401  |
| H2AFY    | chr5:134772309-134776032  |
| MAP9     | chr4:156559393-156562959  |
| B3GNT7   | chr2:232107295-232107796  |
| KLF3     | chr4:38372690-38373191    |
| AKR1E2   | chr10:4169790-4170291     |
| MAP9     | chr4:156561547-156562831  |
| KLF3     | chr4:38374477-38375671    |
| MTAP     | chr9:21575610-21577176    |
| BOD1L1   | chr4:13890236-13890737    |
| ZNF624   | chr17:16808493-16808994   |
| LNX1     | chr4:54727769-54729445    |
| TAB2     | chr6:149355479-149355980  |
| ASMT     | chrX:1804076-1804577      |
| ARNTL    | chr11:13237542-13238746   |
| MDM4     | chr1:204482545-204483327  |
| GSTK1    | chr7:142937296-142937943  |
| CASD1    | chr7:94045143-94053161    |
| COL3A1   | chr2:189676180-189677737  |
| BMP7     | chr20:55639754-55642498   |
| CALML3   | chr10:5627207-5627834     |
| SMAD1    | chr4:146199782-146200964  |
| TRIB2    | chr2:12842544-12843494    |
| DIO2     | chr14:81236183-81236874   |
| FZD1     | chr7:90676366-90677411    |
| TFAP2C   | chr20:55449795-55450296   |
| SNX13    | chr7:17718050-17721657    |
| GAS7     | chr17:10151770-10152271   |
| CD180    | chr5:67410709-67411210    |

|                |                           |
|----------------|---------------------------|
| GRIA4          | chr11:105052248-105052749 |
| CASQ2          | chr1:116323294-116326069  |
| ID2            | chr2:8442431-8443204      |
| STEAP2         | chr7:89807911-89808412    |
| STARD4         | chr5:111016712-111018570  |
| COL3A1         | chr2:189865035-189865668  |
| BCL11B         | chr14:99521470-99521971   |
| FOSL2          | chr2:28353184-28353818    |
| MIS18A         | chr21:33491711-33492212   |
| C11orf45       | chr11:128778509-128779505 |
| INHBB          | chr2:121058084-121058724  |
| OR4B1          | chr11:48022536-48023037   |
| FAM124B        | chr2:225276365-225278672  |
| RASGRP3        | chr2:33754835-33755499    |
| SOX21          | chr13:95919431-95919932   |
| CPB2           | chr13:46753519-46754786   |
| RUNX2          | chr6:44609465-44609966    |
| TCF4           | chr18:53790857-53792465   |
| POU2F2         | chr19:42615800-42616301   |
| ERCC6L2        | chr9:98823828-98824329    |
| ELL2           | chr5:95484831-95486878    |
| S100B          | chr21:47971450-47972810   |
| ENSG0000018231 | chr8:8153373-8154217      |
| BOD1L1         | chr4:13908729-13909809    |
| KIF26B         | chr1:245426652-245427153  |
| PRDM1          | chr6:106034799-106035300  |
| ZNF469         | chr16:88335245-88340362   |
| RNF135         | chr17:29279393-29280168   |
| SHC3           | chr9:91769683-91770184    |
| APCDD1         | chr18:10239475-10240655   |
| SLC46A2        | chr9:115624543-115625638  |
| TLK1           | chr2:172101553-172102054  |
| CSNK1A1L       | chr13:37881128-37881756   |
| LTBP2          | chr14:75083007-75088249   |
| RUNX1          | chr21:36840543-36841044   |
| PDE3A          | chr12:19777961-19778588   |
| GARNL3         | chr9:129921306-129923613  |
| KCNA3          | chr1:111327801-111331546  |
| C7orf10        | chr7:40344584-40345895    |
| BOD1L1         | chr4:13919091-13919726    |
| DCN            | chr12:91615111-91618423   |
| MAP4           | chr3:48179191-48180035    |
| SPRED1         | chr15:38342400-38343413   |
| CSNK1A1L       | chr13:38063423-38066451   |
| IGDCC3         | chr15:65701259-65701896   |
| CAMK2G         | chr10:75654013-75654514   |
| PCSK6          | chr15:102155728-102156229 |
| PEF1           | chr1:32154419-32155578    |
| ZNF692         | chr1:249219704-249220205  |
| DAPK1          | chr9:89589171-89589672    |
| ZRANB2         | chr1:72122956-72126200    |
| CPB2           | chr13:46745898-46746864   |
| CHRNA1         | chr2:175700774-175702491  |
| ELL2           | chr5:95561956-95563961    |
| CSNK1A1L       | chr13:38017359-38017860   |
| VSTM1          | chr19:54538636-54539271   |

|          |                           |
|----------|---------------------------|
| LRTM1    | chr3:55511144-55526179    |
| KIF26B   | chr1:245911068-245917390  |
| PRL      | chr6:22328475-22329126    |
| ELK3     | chr12:96438615-96439116   |
| FRMD4A   | chr10:14048872-14052755   |
| LRTM1    | chr3:55515028-55516034    |
| VRK2     | chr2:57669443-57672773    |
| OTOL1    | chr3:161572673-161573174  |
| IRF2BP2  | chr1:235153771-235155299  |
| PIGC     | chr1:172348463-172354147  |
| PLK1     | chr16:23681795-23682296   |
| CSNK1A1L | chr13:37936985-37937908   |
| PTPRC    | chr1:198745731-198746232  |
| GLIS1    | chr1:54198954-54199455    |
| ZCCHC6   | chr9:89023151-89023652    |
| BRCA2    | chr13:32785374-32787673   |
| CEBPE    | chr14:23639983-23641128   |
| IFT80    | chr3:160121804-160122305  |
| ATP13A3  | chr3:194286536-194287239  |
| NABP1    | chr2:192500312-192500938  |
| ID2      | chr2:8226435-8228677      |
| NID2     | chr14:52706884-52709097   |
| KLF10    | chr8:103794954-103795590  |
| TAOK3    | chr12:118745016-118746246 |
| VMP1     | chr17:57826541-57853759   |
| SIGLEC15 | chr18:43381110-43384367   |
| DCBLD1   | chr6:117769067-117769701  |
| FN1      | chr2:216564861-216565715  |
| NEBL     | chr10:21687711-21688212   |
| SCP2D1   | chr20:18686543-18687044   |
| COL3A1   | chr2:189760358-189766099  |
| LCP1     | chr13:46913459-46913960   |
| COL5A1   | chr9:137394354-137395068  |
| PLSCR1   | chr3:146836709-146837456  |
| SLCO6A1  | chr5:102158300-102158934  |
| ZNF469   | chr16:88334875-88342762   |
| GPR39    | chr2:132425601-132428239  |
| STARD4   | chr5:111012666-111013389  |
| CTHRC1   | chr8:104357388-104358324  |
| CALML3   | chr10:5604965-5609495     |
| PRDM1    | chr6:106040422-106040923  |
| FRMD4A   | chr10:14051439-14052496   |
| CRHBP    | chr5:76151662-76152465    |
| GNAT3    | chr7:80264344-80264845    |
| GTF3C4   | chr9:135521528-135524447  |
| RUNX2    | chr6:44634461-44635826    |
| SMAD7    | chr18:46364921-46366009   |
| SOX9     | chr17:69185655-69186156   |
| IL16     | chr15:81384732-81385233   |
| TRPS1    | chr8:117434704-117437481  |
| S100A12  | chr1:153358436-153359094  |
| PAPPA    | chr9:118358039-118359800  |
| CDK5RAP3 | chr17:46078154-46081443   |
| SNTB1    | chr8:121789637-121790138  |
| AHR      | chr7:17505572-17506356    |
| SMAD7    | chr18:46578917-46579418   |

|          |                           |
|----------|---------------------------|
| RAI14    | chr5:34051437-34055140    |
| FOXB1    | chr15:60095576-60096077   |
| COG6     | chr13:40348377-40353955   |
| ST8SIA4  | chr5:100113371-100114057  |
| RUNX1    | chr21:36361237-36362004   |
| KANK1    | chr9:446219-446720        |
| CSNK1A1L | chr13:37783058-37783559   |
| SMYD3    | chr1:246034109-246040639  |
| FAR2     | chr12:28569265-28569766   |
| EFCAB1   | chr8:49331155-49332879    |
| ZFP36L1  | chr14:69224160-69225423   |
| SULF2    | chr20:46419238-46421794   |
| SPP2     | chr2:235073930-235075399  |
| EXOC2    | chr6:1284863-1288538      |
| KCNE2    | chr21:35706928-35709671   |
| C7orf10  | chr7:40257840-40264912    |
| CHGB     | chr20:5634087-5635336     |
| APPL2    | chr12:105710670-105711444 |
| TTLL7    | chr1:84155072-84155573    |
| BCKDHB   | chr6:80934066-80934918    |
| VRK2     | chr2:58266409-58267049    |
| FRMD6    | chr14:51909933-51910434   |
| FNDC1    | chr6:159797807-159798658  |
| SYK      | chr9:93732151-93732652    |
| MAB21L2  | chr4:151200132-151203167  |
| ITGA1    | chr5:52005032-52005940    |
| VGLL4    | chr3:11571027-11572511    |
| PRL      | chr6:22025533-22027727    |
| ZMIZ2    | chr7:44766904-44767563    |
| LECT2    | chr5:135348090-135348752  |
| RNASEH2B | chr13:50969677-50970178   |
| ANXA13   | chr8:124844469-124845768  |
| ADAMTS12 | chr5:33787664-33788165    |
| RUNX2    | chr6:44627769-44628555    |
| ATP6V1G3 | chr1:198462213-198462714  |
| DAPK1    | chr9:89590295-89592296    |
| UBE2V2   | chr8:49191902-49192403    |
| LCOR     | chr10:98500791-98501585   |
| RARS     | chr5:167836169-167837126  |
| NANOS1   | chr10:120551575-120552251 |
| ADAM12   | chr10:128084826-128087080 |
| SUPT3H   | chr6:45644871-45645652    |
| ADAMTS14 | chr10:72432415-72432916   |
| COL3A1   | chr2:189852918-189853892  |
| MANSC1   | chr12:12635550-12636228   |
| HEY2     | chr6:125795456-125796171  |
| PLAC1    | chrX:133803400-133803901  |
| BMPER    | chr7:33809163-33811488    |
| MPDZ     | chr9:13014203-13014895    |
| DIO2     | chr14:80680381-80680882   |
| MZT2A    | chr2:133141590-133142091  |
| COL3A1   | chr2:189464266-189465346  |
| IL20     | chr1:206997070-206997571  |
| ZNF366   | chr5:71799912-71801824    |
| CRTAM    | chr11:122727012-122728081 |
| LNX1     | chr4:54553455-54554570    |

|           |                           |
|-----------|---------------------------|
| DUSP10    | chr1:222544958-222545459  |
| FAP       | chr2:163097412-163102671  |
| MS4A6A    | chr11:59952986-59953680   |
| PYGB      | chr20:25298093-25299140   |
| LRTM1     | chr3:55223369-55225301    |
| SLA       | chr8:134161418-134166823  |
| ARHGEF26  | chr3:153331423-153333074  |
| PRG4      | chr1:185941493-185942427  |
| TG        | chr8:133957426-133959646  |
| SENP8     | chr15:71920197-71923963   |
| MARCKS    | chr6:114134761-114135262  |
| SULF2     | chr20:46558362-46559255   |
| ZNF532    | chr18:56517151-56517652   |
| LRTM1     | chr3:54988354-54989120    |
| RUNX1     | chr21:36358330-36358831   |
| COL3A1    | chr2:189754527-189770371  |
| PLEKHG7   | chr12:92963663-92964164   |
| CRYBA4    | chr22:27528470-27531684   |
| HEY2      | chr6:125698185-125699202  |
| LYVE1     | chr11:10612770-10615412   |
| DFNB31    | chr9:117314383-117314884  |
| LNX1      | chr4:54726989-54730288    |
| FN1       | chr2:216527553-216528982  |
| SULF2     | chr20:46555639-46556140   |
| RUNX1     | chr21:36535776-36536277   |
| GADD45G   | chr9:92098822-92099323    |
| ATP6V1G3  | chr1:198462017-198471065  |
| FOXP2     | chr7:113686203-113689790  |
| MAP1LC3B2 | chr12:116818861-116821143 |
| MARCH10   | chr17:60866965-60870303   |
| CSNK1A1L  | chr13:38015989-38027891   |
| POGK      | chr1:165823055-165823911  |
| ETNK1     | chr12:22840130-22840758   |
| ELK3      | chr12:96437667-96443263   |
| FAP       | chr2:163112487-163112988  |
| STARD3NL  | chr7:38389055-38390574    |
| COL3A1    | chr2:189489146-189489973  |
| TCF4      | chr18:54231977-54232478   |
| ELL2      | chr5:95555631-95556132    |
| SUPT3H    | chr6:45622123-45630467    |
| AHR       | chr7:17621452-17622294    |
| LY86      | chr6:6362959-6363460      |
| TARS      | chr5:33650474-33651109    |
| MTAP      | chr9:21549041-21564291    |
| PHF3      | chr6:65229626-65230127    |
| SEC11C    | chr18:56605469-56605970   |
| COL3A1    | chr2:189440477-189442752  |
| DIO2      | chr14:81235805-81239376   |
| DCSTAMP   | chr8:105373054-105374451  |
| SIGLEC15  | chr18:43381716-43382937   |
| L3MBTL4   | chr18:6627816-6629143     |
| FAT1      | chr4:187853199-187853849  |
| IGSF21    | chr1:18201383-18201884    |
| PRL       | chr6:21954299-21954981    |
| RBM15     | chr1:110852010-110852511  |
| SLC29A3   | chr10:73132203-73132704   |

|            |                           |
|------------|---------------------------|
| TEP1       | chr14:20895956-20896913   |
| ADAM12     | chr10:127916139-127916640 |
| DBX1       | chr11:20118142-20119462   |
| T          | chr6:166672040-166672541  |
| GALNT5     | chr2:158102463-158104137  |
| SCGN       | chr6:25403333-25408720    |
| FAM129C    | chr19:17633631-17634882   |
| HAO1       | chr20:7674787-7675483     |
| TMTC4      | chr13:101528283-101528936 |
| LIPC       | chr15:58686475-58691075   |
| FLRT2      | chr14:85937931-85938432   |
| ZNF697     | chr1:120229591-120230092  |
| PIGC       | chr1:172246766-172248762  |
| HSF2       | chr6:122334481-122334982  |
| RSU1       | chr10:16870425-16871294   |
| AIG1       | chr6:143496899-143498170  |
| CSNK1A1L   | chr13:37960076-37960577   |
| FOSL2      | chr2:28310132-28310633    |
| KLF4       | chr9:110810602-110811291  |
| RUNX1      | chr21:36561736-36562615   |
| CASQ2      | chr1:116322923-116326671  |
| ST6GALNAC5 | chr1:76719409-76719910    |
| TMEM155    | chr4:122705602-122706103  |
| FEZF2      | chr3:62051355-62051856    |
| TANC2      | chr17:60972771-60973272   |
| CREG2      | chr2:102011815-102013750  |
| ESM1       | chr5:54196549-54197518    |
| GPR111     | chr6:47451913-47452414    |
| CNTLN      | chr9:16963848-16964349    |
| DAPK1      | chr9:89723727-89724733    |
| ZEB1       | chr10:31434783-31437061   |
| CTHRC1     | chr8:104359070-104361830  |
| NTM        | chr11:131942315-131942965 |
| KIF13A     | chr6:17993088-17993589    |
| APCDD1     | chr18:10373465-10382570   |
| AHR        | chr7:17646859-17649619    |
| SULF2      | chr20:46520827-46521328   |
| C14orf180  | chr14:104859756-104860257 |
| TYW5       | chr2:201036622-201037272  |
| CSNK1A1L   | chr13:38100358-38102540   |
| FN1        | chr2:216521830-216530931  |
| NONE       | chr3:59752482-59753113    |
| NDUFV2     | chr18:8744585-8745335     |
| CABLES1    | chr18:20670881-20671382   |
| NDUFV2     | chr18:8944257-8946138     |
| TNFAIP8    | chr5:118022291-118025315  |
| SULF1      | chr8:70544809-70545310    |
| CSNK1A1L   | chr13:37700898-37703969   |
| ZDBF2      | chr2:207095262-207095969  |
| IL1R1      | chr2:102716773-102717274  |
| JAG1       | chr20:11188350-11189017   |
| DDHD1      | chr14:53628933-53629434   |
| HSF2       | chr6:122115408-122116138  |
| APPL2      | chr12:106051377-106054853 |
| CAPNS2     | chr16:55598122-55598623   |
| NONE       | chr12:127654773-127655274 |



|          |                           |
|----------|---------------------------|
| RUNX1    | chr21:36933736-36938779   |
| NDUFV2   | chr18:8960037-8962493     |
| MSX2     | chr5:174224803-174226441  |
| CAAP1    | chr9:26169785-26170286    |
| RASGRP1  | chr15:39542764-39544006   |
| PLSCR1   | chr3:146687296-146689220  |
| BCL2L14  | chr12:12110781-12112938   |
| COL5A1   | chr9:137435466-137439226  |
| ADAM12   | chr10:128109375-128110140 |
| EFCAB1   | chr8:49814862-49817402    |
| FLVCR2   | chr14:76081208-76081709   |
| A1CF     | chr10:52761033-52761534   |
| DOK1     | chr2:74795390-74795891    |
| NFIL3    | chr9:94308081-94310144    |
| SULF2    | chr20:46465291-46466011   |
| GPATCH8  | chr17:42611306-42611969   |
| CDK6     | chr7:92532365-92535225    |
| ZBTB38   | chr3:141055511-141056012  |
| SNX13    | chr7:17698688-17701008    |
| CSNK1A1L | chr13:38057702-38062599   |
| FOXA2    | chr20:22885623-22886124   |
| NUAK2    | chr1:205270555-205271345  |
| FEM1C    | chr5:114918685-114919889  |
| FZD6     | chr8:104197059-104197839  |
| WWC1     | chr5:167231309-167231810  |
| SULF2    | chr20:46644927-46646418   |
| FAM3C    | chr7:121384728-121385369  |
| VMP1     | chr17:57843480-57846396   |
| APCDD1   | chr18:10297205-10308060   |
| SPP2     | chr2:234939410-234942589  |
| RUFY1    | chr5:178803914-178807478  |
| SLTM     | chr15:59268256-59268757   |
| OR6N2    | chr1:158789685-158790186  |
| SPP2     | chr2:235154126-235155622  |
| HSF2     | chr6:122336946-122337447  |
| SNX19    | chr11:131630527-131631028 |
| ARID5A   | chr2:97063346-97063847    |
| IGLL5    | chr22:23128916-23136144   |
| STARD4   | chr5:111280726-111287438  |
| COL3A1   | chr2:189532514-189534776  |
| RUNX1    | chr21:36584508-36585175   |
| BBX      | chr3:106935872-106936373  |
| THBS1    | chr15:39005821-39008449   |
| USP7     | chr16:9165845-9167844     |
| ORM1     | chr9:117038330-117039022  |
| HNRNPA3  | chr2:177284106-177284607  |
| FHOD3    | chr18:33888756-33891022   |
| SOX21    | chr13:95919208-95921630   |
| TGFB3    | chr14:76296569-76300362   |
| BLNK     | chr10:98018098-98018599   |
| COX7A2   | chr6:75982257-75983128    |
| MFGE8    | chr15:89609527-89614830   |
| RNF135   | chr17:29281410-29282254   |
| CSNK1A1L | chr13:37737090-37737591   |
| PIGC     | chr1:172352055-172352739  |
| ABCD3    | chr1:94781131-94781632    |

|          |                          |
|----------|--------------------------|
| BCAR1    | chr16:75336123-75336624  |
| COPS8    | chr2:237676303-237679959 |
| GADD45G  | chr9:92445425-92446207   |
| PITPNB   | chr22:28536959-28537627  |
| RGCC     | chr13:42187143-42190291  |
| ENOX1    | chr13:44404321-44405013  |
| DCN      | chr12:91643816-91646331  |
| TIGIT    | chr3:114050661-114051499 |
| ACTBL2   | chr5:56834595-56835286   |
| EPCAM    | chr2:47417135-47417636   |
| UCP1     | chr4:141639848-141640539 |
| CDCP1    | chr3:45145751-45148852   |
| CDH5     | chr16:65579692-65583895  |
| CSNK1A1L | chr13:37742464-37752736  |
| BOD1L1   | chr4:13908228-13910750   |
| RRM2B    | chr8:103379685-103381394 |
| SEPP1    | chr5:42983805-42986970   |
| IL18BP   | chr11:71655546-71656513  |
| CSNK1A1L | chr13:38053352-38069734  |
| AUTS2    | chr7:68739655-68743641   |
| CDH17    | chr8:95111440-95114880   |
| SPECC1   | chr17:20110363-20110864  |
| ZFH3     | chr16:73186939-73187626  |
| RHOBTB1  | chr10:63022808-63023309  |
| COL3A1   | chr2:189748006-189749093 |
| MAP9     | chr4:156523312-156524710 |
| PRL      | chr6:22236710-22237591   |
| AKTIP    | chr16:53699484-53700110  |
| MAN1A1   | chr6:119941579-119943338 |
| HPRT1    | chrX:133683067-133685735 |
| PTPRC    | chr1:198743665-198748236 |
| DYRK2    | chr12:67774766-67777347  |
| S100A8   | chr1:153362961-153363462 |
| BRCA2    | chr13:32784859-32788429  |
| GREM1    | chr15:32979168-32979669  |
| CSNK1A1L | chr13:38054970-38055637  |
| MME      | chr3:154796464-154798329 |
| CSNK1A1L | chr13:38056179-38056680  |
| FCN2     | chr9:137705532-137706535 |
| DPYD     | chr1:98366890-98367535   |
| SPP2     | chr2:235149888-235150660 |
| KITLG    | chr12:89176203-89176704  |
| TCF4     | chr18:53789595-53793233  |
| RUNX1    | chr21:36721121-36727808  |
| ITGB1    | chr10:33522009-33522926  |
| DST      | chr6:56776347-56777957   |
| PAPPA    | chr9:117967356-117969940 |
| DCN      | chr12:91757710-91758211  |
| SMYD3    | chr1:246164937-246165438 |
| SKAP1    | chr17:46558623-46565762  |
| SLA      | chr8:134027929-134030278 |
| RUFY1    | chr5:178803841-178805854 |
| SEPT11   | chr4:77674420-77676497   |
| COL3A1   | chr2:189438169-189439453 |
| TMEM260  | chr14:56800026-56801184  |
| INHBA    | chr7:41460663-41461499   |

|           |                           |
|-----------|---------------------------|
| PAPPA     | chr9:118789965-118790610  |
| SGIP1     | chr1:66954038-66962433    |
| MAN1A1    | chr6:119941773-119942274  |
| PALLD     | chr4:169542882-169544028  |
| APCDD1    | chr18:10039980-10040990   |
| TAOK3     | chr12:118743976-118746789 |
| RARB      | chr3:25551185-25551686    |
| MARCKS    | chr6:114133370-114135993  |
| TYW5      | chr2:201036161-201038983  |
| FN1       | chr2:216529740-216530241  |
| STXBP5    | chr6:147360502-147361136  |
| NABP1     | chr2:192266279-192266780  |
| FOSL2     | chr2:28303135-28304896    |
| CDH17     | chr8:95176601-95178433    |
| PIK3R6    | chr17:8826124-8826625     |
| ZNF703    | chr8:37273595-37274096    |
| AASDHPPT  | chr11:106268993-106269849 |
| IFI44L    | chr1:79026820-79027321    |
| GINM1     | chr6:149884257-149884884  |
| COPS8     | chr2:238005870-238006502  |
| AK5       | chr1:77836120-77836621    |
| NTM       | chr11:131941297-131941798 |
| DAAM1     | chr14:59281650-59282151   |
| TBXAS1    | chr7:139530373-139530874  |
| PCSK5     | chr9:78056152-78057619    |
| DCSTAMP   | chr8:105372069-105375062  |
| PLCXD3    | chr5:41795041-41795542    |
| GREB1L    | chr18:18743105-18744274   |
| PRL       | chr6:22364260-22364761    |
| COL8A1    | chr3:99427570-99428384    |
| ARNTL     | chr11:13236247-13239360   |
| ZMIZ1     | chr10:80477727-80478228   |
| FOXI1     | chr5:169230418-169231176  |
| ADAMTS14  | chr10:72452707-72456116   |
| DPF3      | chr14:73109305-73111027   |
| CUL3      | chr2:225746389-225747066  |
| GRIA4     | chr11:105050950-105054706 |
| WWC1      | chr5:167125658-167126472  |
| ADAMTS2   | chr5:178733446-178734466  |
| MANSC1    | chr12:12540285-12540786   |
| ZNF532    | chr18:56467242-56468960   |
| STK38L    | chr12:27329236-27334780   |
| ZFAND3    | chr6:37682060-37682561    |
| COPS8     | chr2:238031538-238032039  |
| DUPD1     | chr10:76802253-76802754   |
| SPATS2L   | chr2:200992139-200992640  |
| EFHD2     | chr1:15585845-15586476    |
| ADCY8     | chr8:132826107-132830813  |
| REXO1L10P | chr8:86853729-86856299    |
| NR5A2     | chr1:200148782-200149435  |
| CLDN20    | chr6:155253072-155255197  |
| ATP6V1G3  | chr1:198463358-198464315  |
| NEBL      | chr10:20914088-20914589   |
| GREM1     | chr15:33131115-33131616   |
| MED10     | chr5:6228238-6228872      |
| FAM120B   | chr6:170714733-170715415  |

|          |                           |
|----------|---------------------------|
| CDH17    | chr8:95111119-95116972    |
| C7orf10  | chr7:40854630-40855131    |
| MRC2     | chr17:60690891-60691392   |
| MAP4     | chr3:48178680-48180051    |
| ARHGEF26 | chr3:153330667-153334051  |
| TMEM170B | chr6:11609111-11609753    |
| SULF2    | chr20:46520730-46521672   |
| LRIG1    | chr3:66353216-66354023    |
| GNAL     | chr18:11246243-11246931   |
| PRL      | chr6:22366880-22367513    |
| TMEM131  | chr2:98950194-98950956    |
| KRBOX4   | chrX:45337840-45339157    |
| FEZF2    | chr3:62571178-62574416    |
| MARK3    | chr14:103827566-103829194 |
| TANC2    | chr17:60901884-60902385   |
| RAB27B   | chr18:52804510-52809810   |
| MEOX1    | chr17:41811231-41811732   |
| FAM105B  | chr5:14574437-14575097    |
| RAB27B   | chr18:52806274-52807379   |
| HELB     | chr12:66661211-66663961   |
| FHOD3    | chr18:33895313-33895965   |
| PRRX1    | chr1:170587150-170590286  |
| RUNX1    | chr21:36952679-36954099   |
| PCED1B   | chr12:47308159-47308660   |
| FAM198B  | chr4:159043336-159044017  |
| KLF7     | chr2:208258706-208260756  |
| EFCAB1   | chr8:49814457-49818157    |
| ARHGEF7  | chr13:111684375-111685005 |
| RASGRP1  | chr15:39539841-39541331   |
| CYP19A1  | chr15:51496554-51497055   |
| NRP1     | chr10:33653569-33655988   |
| RUNX1    | chr21:36721010-36724347   |
| SLC16A9  | chr10:61321536-61322037   |
| MME      | chr3:154959073-154959574  |
| TNFAIP3  | chr6:137959646-137960147  |
| SENP8    | chr15:71919038-71929263   |
| CD163L1  | chr12:7651931-7652704     |
| SSUH2    | chr3:8663815-8664640      |
| IL1R1    | chr2:102715395-102718897  |
| ME3      | chr11:86226317-86227839   |
| MARCKS   | chr6:113769163-113771387  |
| MTAP     | chr9:21579256-21579757    |
| LIPC     | chr15:58809495-58810227   |
| FGGY     | chr1:59391639-59400450    |
| PRTG     | chr15:56201537-56202038   |
| FZD6     | chr8:104240934-104243306  |
| CHRNA1   | chr2:175698486-175703300  |
| SLC36A1  | chr5:150858563-150864769  |
| CD163    | chr12:7708836-7709337     |
| TYW5     | chr2:201089984-201090485  |
| APH1B    | chr15:63542796-63543436   |
| BMP7     | chr20:55606310-55606811   |
| NR2F1    | chr5:92544633-92545559    |
| LSG1     | chr3:194918387-194919086  |
| MAN1A1   | chr6:119948160-119949977  |
| MYH2     | chr17:10459523-10460316   |

|           |                           |
|-----------|---------------------------|
| HTR2A     | chr13:47911945-47912446   |
| ATP13A3   | chr3:194285862-194288019  |
| FCN2      | chr9:137713825-137714326  |
| NABP1     | chr2:192301384-192302486  |
| ACTR3     | chr2:114518497-114520990  |
| ZNF281    | chr1:200336629-200338021  |
| INHBA     | chr7:41136199-41138863    |
| CSNK1A1L  | chr13:37738307-37739633   |
| FGF1      | chr5:142001126-142001627  |
| SUPT3H    | chr6:45591713-45594959    |
| SNX6      | chr14:35119020-35120077   |
| ATP5G3    | chr2:176794395-176794896  |
| FLRT2     | chr14:85526099-85526600   |
| EXT1      | chr8:119269320-119269821  |
| GALM      | chr2:38923614-38924115    |
| FABP4     | chr8:82408410-82414323    |
| CDH5      | chr16:65579209-65584032   |
| TARS      | chr5:33649033-33651641    |
| AMZ1      | chr7:2748476-2751528      |
| DDC       | chr7:50677913-50678414    |
| C2CD4A    | chr15:62149285-62149955   |
| ANAPC4    | chr4:25332446-25333927    |
| NR3C1     | chr5:142601783-142602720  |
| MANSC1    | chr12:12532307-12533211   |
| NTMT1     | chr9:131999701-132000202  |
| SLMO2     | chr20:57740572-57741208   |
| GMPR      | chr6:16436888-16437541    |
| SOGA1     | chr20:35559631-35560132   |
| PPP6R2    | chr22:50799519-50800218   |
| NPAS1     | chr19:47434243-47442942   |
| CRYBB3    | chr22:25461665-25469259   |
| PHF19     | chr9:123654329-123654830  |
| TAPBPL    | chr12:6551875-6558495     |
| SLC41A2   | chr12:105431097-105431787 |
| SARDH     | chr9:136563738-136569315  |
| TBL1XR1   | chr3:177144529-177145159  |
| CDH13     | chr16:82685429-82685930   |
| PTGFRN    | chr1:117352773-117353814  |
| TRIB1     | chr8:126660265-126661488  |
| ASMTL     | chrX:1585235-1591846      |
| GAB2      | chr11:78174949-78178247   |
| PURB      | chr7:44931253-44931931    |
| DYNC1H1   | chr14:102285292-102285793 |
| SLC4A7    | chr3:27680363-27682052    |
| DYNLRB2   | chr16:80689801-80691838   |
| DBH       | chr9:136542882-136543743  |
| DAD1      | chr14:22988957-22991169   |
| DCLRE1A   | chr10:115719515-115721019 |
| CHRNA9    | chr4:40300256-40314920    |
| CASP8     | chr2:202116804-202117305  |
| EFCAB10   | chr7:105445016-105451645  |
| LRP8      | chr1:53873161-53882368    |
| PITRM1    | chr10:3798399-3798900     |
| COL24A1   | chr1:86853842-86857120    |
| CDC42SE2  | chr5:130589875-130590376  |
| KRTAP19-8 | chr21:32556469-32556970   |

|         |                          |
|---------|--------------------------|
| CXCR3   | chrX:70838060-70838561   |
| CLPB    | chr11:72230273-72232151  |
| DYNLRB2 | chr16:80690240-80690741  |
| MTO1    | chr6:74180645-74181146   |
| FAM19A5 | chr22:48492286-48495682  |
| DAD1    | chr14:22992853-22993354  |
| SARDH   | chr9:136566201-136568675 |
| SLC30A7 | chr1:101414591-101417104 |
| ARG1    | chr6:131601702-131604222 |
| CELSR1  | chr22:47009079-47009747  |
| RNF19A  | chr8:101506083-101507823 |
| ARL4C   | chr2:235397333-235399252 |
| FAM184A | chr6:119635111-119636053 |
| DBH     | chr9:136540408-136544499 |
| CHRNA9  | chr4:40244627-40245128   |
| DAD1    | chr14:23000536-23002649  |
| SYNE1   | chr6:152502544-152509757 |
| SLMO2   | chr20:57738269-57739512  |
| SEPT7   | chr7:35768562-35769063   |
| MRPS6   | chr21:35306739-35307240  |
| DAD1    | chr14:22994167-22994668  |
| GPR68   | chr14:91868623-91869580  |
| CYFIP2  | chr5:156621118-156621768 |
| NLN     | chr5:65015021-65015522   |
| CD27    | chr12:6532643-6538261    |
| VANGL2  | chr1:160396593-160403694 |
| PLEKHO1 | chr1:150077080-150085546 |
| TUBGCP5 | chr15:22547432-22558028  |
| DAD1    | chr14:22978080-22979642  |
| VANGL2  | chr1:160398669-160400247 |
| TLDC1   | chr16:84580983-84589583  |
| AMIGO2  | chr12:47785242-47786379  |
| THBS1   | chr15:38958846-38967781  |
| VARS    | chr6:31765562-31766063   |
| SLC14A1 | chr18:43245932-43246433  |
| CDH13   | chr16:82689319-82689820  |
| CHRNA9  | chr4:40190281-40236501   |
| GPI     | chr19:34840730-34841231  |
| CXCR3   | chrX:70839769-70840270   |
| ADSL    | chr22:40720101-40720802  |
| LDLRAD4 | chr18:13376829-13378206  |
| SKAP1   | chr17:46502910-46508324  |
| CXCR3   | chrX:70835285-70845259   |
| PTGIS   | chr20:48286296-48286797  |
| DDX43   | chr6:74131890-74132391   |
| PSTPIP1 | chr15:77305365-77305866  |
| ST8SIA1 | chr12:22558935-22571599  |
| PRR5L   | chr11:36443096-36443722  |
| ANKRD32 | chr5:94127733-94131451   |
| RHOH    | chr4:40195867-40196759   |
| MRPS10  | chr6:42353871-42363833   |
| MANSC1  | chr12:12537405-12537906  |
| MAOA    | chrX:42797766-42811880   |
| AIM1    | chr6:106970350-106970851 |
| ZBTB7A  | chr19:4108186-4110586    |
| IL21R   | chr16:27416994-27417653  |

|                |                          |
|----------------|--------------------------|
| PGAP1          | chr2:198058554-198083702 |
| STK17B         | chr2:197039167-197039668 |
| LYZL2          | chr10:30991593-30992094  |
| DRD3           | chr3:113930069-113946920 |
| STIM2          | chr4:26884955-26889831   |
| GPR171         | chr3:150916592-150924147 |
| ABCC1          | chr16:16054652-16055758  |
| NEK2           | chr1:211854593-211855094 |
| CD27           | chr12:6553986-6555033    |
| CELSR1         | chr22:47008011-47010947  |
| BICD1          | chr12:31960139-31960640  |
| CCR7           | chr17:38754246-38755318  |
| CD5            | chr11:60807126-60811572  |
| CHRNA9         | chr4:40302186-40303377   |
| TBX21          | chr17:45808380-45815157  |
| KAT7           | chr17:47821985-47828708  |
| FAM83D         | chr20:37470694-37471333  |
| SAG            | chr2:234173752-234181486 |
| LAT            | chr16:29018458-29026471  |
| INTS10         | chr8:19483727-19484228   |
| TNRC6B         | chr22:40299270-40299771  |
| NPAS1          | chr19:47436878-47439149  |
| NLRC5          | chr16:57038362-57038863  |
| CD84           | chr1:160605661-160618700 |
| UNC45B         | chr17:33487097-33490110  |
| PRDM1          | chr6:105903810-105904311 |
| PRDM1          | chr6:105900063-105911501 |
| KAZN           | chr1:14059437-14060884   |
| GPR56          | chr16:57633161-57638132  |
| PLD6           | chr17:17083446-17083947  |
| IL2RB          | chr22:37562925-37564462  |
| CLEC2D         | chr12:9822347-9823366    |
| PIP4K2A        | chr10:22943544-22944045  |
| RNASEH2B       | chr13:50996471-50997129  |
| PVRIG          | chr7:99816868-99817606   |
| ZNF704         | chr8:82009131-82009632   |
| THBS1          | chr15:38964261-38964762  |
| ENSG0000025620 | chr11:14598605-14602616  |
| CLEC2D         | chr12:9814544-9832825    |
| ADORA3         | chr1:112140417-112140918 |
| ABCD2          | chr12:40007884-40018451  |
| EDN1           | chr6:12051910-12053364   |
| MRPS6          | chr21:35308394-35309952  |
| IL2RB          | chr22:37565062-37565563  |
| NR2F2          | chr15:96382227-96382728  |
| FYCO1          | chr3:46015723-46016224   |
| IQGAP2         | chr5:75620153-75625379   |
| TRPS1          | chr8:116440097-116440598 |
| TNFSF14        | chr19:6673919-6676080    |
| DAB2           | chr5:40383416-40384091   |
| MPC1           | chr6:166829808-166830455 |
| MYH9           | chr22:36771965-36773098  |
| EMCN           | chr4:101938388-101944356 |
| MAOA           | chrX:42802069-42802744   |
| TIGD2          | chr4:90216544-90217045   |
| SYNE1          | chr6:152492422-152493070 |

|                |                           |
|----------------|---------------------------|
| GRB7           | chr17:37922658-37941763   |
| CRYBB3         | chr22:25456883-25459564   |
| FOXP1          | chr3:71542107-71542608    |
| CCDC167        | chr6:37480289-37487227    |
| STH            | chr17:44095444-44099584   |
| CD5            | chr11:60842562-60851807   |
| TC2N           | chr14:92332720-92333810   |
| UXS1           | chr2:106772689-106779594  |
| CD44           | chr11:35099577-35100963   |
| IKZF1          | chr7:50419582-50420083    |
| TTN            | chr2:179894325-179898700  |
| ITGA4          | chr2:181989309-181989810  |
| RFFL           | chr17:33371134-33382038   |
| ST8SIA1        | chr12:22560578-22565481   |
| GPR174         | chrX:78361984-78365900    |
| RIN3           | chr14:93034968-93035469   |
| ENSG0000016632 | chr17:55678822-55679323   |
| GALM           | chr2:38890142-38899942    |
| RHEB           | chr7:151465483-151466312  |
| BATF           | chr14:75980577-75982199   |
| CXXC11         | chr2:242809947-242811134  |
| C1QTNF9        | chr13:24838950-24839640   |
| FBLN7          | chr2:112912712-112913365  |
| TAF1B          | chr2:9821393-9821894      |
| DAD1           | chr14:23010271-23010772   |
| GCM1           | chr6:53196661-53204092    |
| DUSP4          | chr8:29353764-29358817    |
| OR4B1          | chr11:48023823-48024324   |
| TFIP11         | chr22:26974954-26976094   |
| FANCE          | chr6:35315991-35316492    |
| DAD1           | chr14:22941652-23040684   |
| RGS12          | chr4:3204336-3204837      |
| ANTXR2         | chr4:81091194-81096210    |
| MEF2D          | chr1:156493112-156496578  |
| VOPP1          | chr7:55603327-55603828    |
| SCML4          | chr6:108144702-108145203  |
| CTLA4          | chr2:204718786-204719287  |
| ZBP2           | chr17:38016530-38024959   |
| ABCD2          | chr12:40015012-40015513   |
| TNFAIP8        | chr5:118605926-118606427  |
| HSPA8          | chr11:122940932-122941433 |
| GAB2           | chr11:78176049-78176550   |
| DUSP4          | chr8:29846506-29854854    |
| SCML4          | chr6:108139540-108146695  |
| GPR56          | chr16:57634252-57635560   |
| DAD1           | chr14:23013104-23013864   |
| MRPS6          | chr21:35303467-35312234   |
| RNF19A         | chr8:101398501-101399163  |
| CD5            | chr11:60869346-60869847   |
| GPR88          | chr1:100862734-100863235  |
| STRBP          | chr9:126083867-126086186  |
| ARHGAP15       | chr2:143882341-143891095  |
| GDAP2          | chr1:118206587-118207088  |
| SUSD3          | chr9:95721995-95735525    |
| TBKBP1         | chr17:45735264-45738961   |
| PBX4           | chr19:19713059-19713560   |



|          |                           |
|----------|---------------------------|
| GATA3    | chr10:8372730-8375794     |
| IKZF1    | chr7:50354220-50356220    |
| CA12     | chr15:63772085-63772586   |
| SUPT3H   | chr6:45978658-45979159    |
| PSAPL1   | chr4:7857178-7857679      |
| NAP1L4   | chr11:3034690-3035316     |
| ARSG     | chr17:66249598-66250248   |
| TNFSF9   | chr19:6536521-6537022     |
| CABYR    | chr18:21573767-21574637   |
| UBL3     | chr13:30476809-30478393   |
| TRAF5    | chr1:211526272-211526773  |
| ETS1     | chr11:128395685-128396313 |
| IL2RB    | chr22:37545092-37546124   |
| FAM105B  | chr5:14705604-14707602    |
| PATL2    | chr15:44966067-44979407   |
| CXCR6    | chr3:45986383-45987303    |
| CD5      | chr11:60870610-60871111   |
| VANGL2   | chr1:160406457-160409253  |
| PTGER2   | chr14:52735194-52735695   |
| TRIB1    | chr8:126618587-126620095  |
| DDX6     | chr11:118742870-118750542 |
| HIF1A    | chr14:61802702-61803203   |
| DBH      | chr9:136545235-136551671  |
| IKZF2    | chr2:214103336-214104897  |
| KLF12    | chr13:74636802-74637582   |
| CD5      | chr11:60827940-60828599   |
| MPC1     | chr6:166833295-166833796  |
| LRRC16A  | chr6:24927627-24942270    |
| APOBEC4  | chr1:183923694-183928035  |
| CELF2    | chr10:11192089-11192590   |
| EMCN     | chr4:101940355-101940988  |
| UBL3     | chr13:30715871-30728683   |
| VRK1     | chr14:97922272-97927106   |
| FBXW7    | chr4:153505069-153508734  |
| BLK      | chr8:11314595-11315560    |
| TRAF5    | chr1:211508663-211509419  |
| CABYR    | chr18:21572353-21573154   |
| CELF2    | chr10:11185978-11195884   |
| ICAM2    | chr17:62128029-62128530   |
| CKMT2    | chr5:80302830-80303331    |
| LDHD     | chr16:75109533-75110168   |
| CST7     | chr20:24929859-24930679   |
| PTGFRN   | chr1:117340474-117360707  |
| JPH2     | chr20:42845751-42849106   |
| GALNT11  | chr7:151841509-151842677  |
| EPB41    | chr1:29251084-29257870    |
| ERI1     | chr8:8729451-8730296      |
| TMEM75   | chr8:128985309-128995420  |
| KCNA2    | chr1:111209329-111218516  |
| MYO7A    | chr11:76864229-76864881   |
| GMPR     | chr6:16420380-16422367    |
| PKN2     | chr1:88702128-88702629    |
| PIP4K2A  | chr10:22929210-22948260   |
| TMEM2    | chr9:74398436-74398937    |
| CACNA2D4 | chr12:2102864-2103365     |
| HS3ST3B1 | chr17:14104026-14105710   |

|          |                           |
|----------|---------------------------|
| SLC35D2  | chr9:99160478-99162936    |
| DNAH14   | chr1:224810344-224813035  |
| THSD7B   | chr2:136892297-136893857  |
| FYCO1    | chr3:46017050-46018020    |
| OR1F1    | chr16:3264400-3266942     |
| TIGIT    | chr3:114008486-114021822  |
| LPIN2    | chr18:3056838-3063313     |
| FBXL22   | chr15:64000794-64001295   |
| KIF2A    | chr5:61552006-61552648    |
| KCNV2    | chr9:2655083-2655737      |
| PRR5L    | chr11:36396380-36403320   |
| CD27     | chr12:6535750-6536417     |
| TFRC     | chr3:195913315-195914520  |
| EPHB6    | chr7:142498598-142499099  |
| SLA2     | chr20:35271068-35276264   |
| AGMAT    | chr1:15904965-15906724    |
| RBM38    | chr20:55973542-55974630   |
| QPRT     | chr16:29713011-29713512   |
| AMZ2     | chr17:66176604-66182402   |
| SLA      | chr8:134071209-134072096  |
| TNFAIP8  | chr5:118635390-118635891  |
| CALHM1   | chr10:105224843-105233473 |
| IGLL5    | chr22:23155462-23166922   |
| LAT      | chr16:29159873-29160374   |
| NPAS1    | chr19:47452870-47463947   |
| NEDD4    | chr15:56335080-56335720   |
| PHF19    | chr9:123685662-123688563  |
| PTK2B    | chr8:27238001-27238502    |
| TIGD2    | chr4:90208827-90210028    |
| LAX1     | chr1:203734136-203735626  |
| CBLB     | chr3:105471551-105472052  |
| DUSP2    | chr2:96829225-96830452    |
| CRYBB3   | chr22:25463184-25465082   |
| CXCR6    | chr3:46006299-46006938    |
| PLCL1    | chr2:198869836-198870535  |
| STAT4    | chr2:192068785-192070036  |
| ANXA6    | chr5:150590241-150592530  |
| CCR6     | chr6:167459762-167462850  |
| AGMAT    | chr1:15903758-15907492    |
| NPAT     | chr11:108095665-108097584 |
| PIK3R2   | chr19:18230008-18230780   |
| LYZ      | chr12:69721582-69727207   |
| SEPN1    | chr1:26099254-26103077    |
| RNASEH2B | chr13:50938744-50942273   |
| TGFBR1   | chr9:101815563-101816064  |
| ATP2B1   | chr12:90275565-90276066   |
| CCZ1B    | chr7:7195389-7200309      |
| PTGFRN   | chr1:117305346-117306342  |
| CRIM1    | chr2:36467355-36467856    |
| ZNF618   | chr9:116278109-116283606  |
| ASMTL    | chrX:1598609-1603589      |
| PIGB     | chr15:55567027-55579060   |
| MPZL1    | chr1:167772098-167775179  |
| FAM9C    | chrX:13111458-13113409    |
| ERMN     | chr2:158288556-158304949  |
| FZD1     | chr7:90956220-90956721    |

|          |                          |
|----------|--------------------------|
| ZNF683   | chr1:26695889-26706176   |
| SNX20    | chr16:50711007-50723755  |
| UBASH3A  | chr21:43825004-43826010  |
| TAB2     | chr6:149469030-149469531 |
| TSHZ2    | chr20:51026207-51028124  |
| TMEM2    | chr9:74407243-74412420   |
| TMEM170B | chr6:11258748-11259582   |
| DAD1     | chr14:22986357-22987952  |
| IL21R    | chr16:27411366-27422273  |
| CDV3     | chr3:133224462-133226352 |
| CCR7     | chr17:38758841-38759342  |
| JHDM1D   | chr7:139910043-139910544 |
| GPR56    | chr16:57609963-57614294  |
| PRF1     | chr10:72360661-72364037  |
| SIPA1L1  | chr14:71608704-71609205  |
| POLI     | chr18:51790724-51791225  |
| SLAMF1   | chr1:160615216-160617210 |
| PTGFRN   | chr1:117349974-117351969 |
| SLMO2    | chr20:57720964-57723321  |
| KANK1    | chr9:277988-278656       |
| GBP6     | chr1:89733638-89755573   |
| UTS2     | chr1:7989430-7992551     |
| AMIGO2   | chr12:47598926-47618881  |
| ZNF32    | chr10:44748916-44749417  |
| CCL5     | chr17:34219623-34220254  |
| SFN      | chr1:27159558-27160059   |
| GRB7     | chr17:37946630-37953072  |
| ARHGAP25 | chr2:68986025-69008421   |
| QPRT     | chr16:29672362-29679325  |
| TMSB4X   | chrX:13014963-13029511   |
| PTPRC    | chr1:198586641-198658059 |
| CARD11   | chr7:3081624-3084458     |
| HS3ST3B1 | chr17:14094736-14110500  |
| CD247    | chr1:167417553-167418250 |
| FGR      | chr1:27989245-27990014   |
| CXCR6    | chr3:45990398-45993692   |
| CXCR3    | chrX:70842188-70843503   |
| PRKCQ    | chr10:6616324-6628874    |
| CPLX1    | chr4:871855-874410       |
| GALM     | chr2:38924899-38925400   |
| DAZL     | chr3:16882646-16886399   |
| BCL11B   | chr14:99396599-99400357  |
| GPR174   | chrX:78363671-78364595   |
| EPHB6    | chr7:142500062-142500563 |
| MRPL1    | chr4:78748059-78748560   |
| EPHB6    | chr7:142505975-142506476 |
| FRMD4A   | chr10:14603768-14605081  |
| EIF3G    | chr19:10251123-10257544  |
| MGAT4A   | chr2:99386436-99386937   |
| MBNL1    | chr3:151968729-151978317 |
| UBASH3A  | chr21:43821261-43829736  |
| TMEM75   | chr8:128992363-128992864 |
| CRYBA4   | chr22:27037108-27045777  |
| MAX      | chr14:65753177-65759420  |
| SRSF7    | chr2:38936957-38937458   |
| SP140    | chr2:231090477-231091125 |

|              |                           |
|--------------|---------------------------|
| LRRN3        | chr7:110652977-110653478  |
| THBS1        | chr15:38938927-38947031   |
| IL10RA       | chr11:117814861-117825540 |
| RPLP1        | chr15:69760772-69761640   |
| PLEKHF1      | chr19:30162047-30164118   |
| KAT7         | chr17:47823604-47825305   |
| NONE         | chr12:127647212-127648457 |
| AGAP10       | chr10:47638687-47642649   |
| EPHA4        | chr2:222379657-222386337  |
| ST8SIA4      | chr5:100188678-100190404  |
| SEMA4D       | chr9:92034787-92036356    |
| SIPA1L1      | chr14:71448858-71449359   |
| TULP4        | chr6:158710467-158713028  |
| CXXC5        | chr5:138944791-138945757  |
| IREB2        | chr15:78682257-78682758   |
| RFTN1        | chr3:16522248-16523945    |
| P2RY2        | chr11:72862172-72871257   |
| VIPR2        | chr7:158987554-158992782  |
| ZNF821       | chr16:71915372-71915873   |
| FRMD4A       | chr10:14627708-14628209   |
| DUSP4        | chr8:29346619-29352035    |
| KIFC1        | chr6:33309151-33313927    |
| APOBEC3H     | chr22:39482591-39496984   |
| SSTR3        | chr22:37624524-37626916   |
| FBXL7        | chr5:14925656-14926157    |
| ABCC10       | chr6:43349854-43353356    |
| PDGFD        | chr11:104668618-104670875 |
| TAB2         | chr6:149458842-149463590  |
| ITGB1        | chr10:33442255-33443543   |
| LRRRC8D      | chr1:90204943-90205444    |
| CD70         | chr19:6666821-6671251     |
| TLK1         | chr2:172175545-172176046  |
| TC2N         | chr14:92335922-92337221   |
| SLFN12L      | chr17:33860038-33863132   |
| DDC          | chr7:50728475-50732422    |
| C8orf44-SGK3 | chr8:67576155-67576656    |
| EMB          | chr5:49931173-49931674    |
| CCL5         | chr17:34214569-34221716   |
| APOL5        | chr22:36055450-36057247   |
| CLECL1       | chr12:9884868-9885369     |
| SLC39A10     | chr2:196400119-196400620  |
| DCN          | chr12:92267056-92273545   |
| OXNAD1       | chr3:16338999-16362011    |
| CRYBB3       | chr22:25458198-25458901   |
| SMAGP        | chr12:51714523-51715024   |
| CHIA         | chr1:111768785-111769466  |
| FBXL7        | chr5:14992975-14993476    |
| RGL4         | chr22:24036346-24039988   |
| SAG          | chr2:234178431-234180388  |
| VRK1         | chr14:97924698-97926035   |
| MAP4K1       | chr19:39027078-39030995   |
| MBOAT1       | chr6:20364909-20369239    |
| CYTIP        | chr2:158325375-158326145  |
| NSMAF        | chr8:59711075-59721331    |
| OR5B21       | chr11:58292777-58293278   |
| MAP4K1       | chr19:39028530-39030464   |

|           |                          |
|-----------|--------------------------|
| LPIN2     | chr18:3059869-3061599    |
| LPIN2     | chr18:2982378-2982879    |
| IGSF3     | chr1:117277788-117285090 |
| TIGD2     | chr4:90202489-90230019   |
| ITGAE     | chr17:3669192-3669900    |
| ZHX1      | chr8:124398319-124399034 |
| PAQR8     | chr6:52167743-52174527   |
| ST3GAL5   | chr2:86078379-86081854   |
| KLF2      | chr19:16479051-16479910  |
| CD84      | chr1:160608287-160609003 |
| FHL2      | chr2:106352782-106359090 |
| TNFAIP8   | chr5:118666215-118666716 |
| C2orf71   | chr2:29230923-29241709   |
| SLC45A4   | chr8:142255361-142256160 |
| GCM1      | chr6:53199626-53201609   |
| SLC45A4   | chr8:142253897-142256794 |
| LYZ       | chr12:69724758-69725519  |
| TIGD2     | chr4:90236681-90240393   |
| FOXP1     | chr3:71499999-71507918   |
| FNDC1     | chr6:159474643-159488174 |
| SNX18     | chr5:53905928-53906557   |
| SMCHD1    | chr18:2641792-2642293    |
| KRTAP12-4 | chr21:46077888-46078389  |
| AKR1E2    | chr10:3919311-3920311    |
| CXCL13    | chr4:78114211-78116494   |
| PTK2B     | chr8:27231840-27240371   |
| IL7R      | chr5:35853784-35854679   |
| SNX9      | chr6:157956243-157957704 |
| FBLN7     | chr2:112943583-112947475 |
| GPR68     | chr14:91698131-91699157  |
| LPIN2     | chr18:2968151-2968854    |
| RUNX3     | chr1:25290864-25291671   |
| SLC2A11   | chr22:24186917-24187418  |
| ZBTB38    | chr3:140984807-140987281 |
| HIVEP2    | chr6:143234678-143235179 |
| ZNF276    | chr16:89826373-89832390  |
| IGSF3     | chr1:117280415-117281933 |
| KRTAP19-8 | chr21:32531910-32532411  |
| SLA       | chr8:134069523-134070217 |
| LPP       | chr3:187691411-187694767 |
| F2RL2     | chr5:75838150-75840354   |
| PTGFRN    | chr1:117299288-117300087 |
| SOCS1     | chr16:11326610-11328178  |
| NINJ2     | chr12:838082-838789      |
| SLC14A2   | chr18:42339339-42340034  |
| SCARF2    | chr22:20816697-20821237  |
| ST6GAL1   | chr3:186742777-186744028 |
| MLNR      | chr13:49720783-49721674  |
| CD96      | chr3:111261124-111261625 |
| TRAF3IP3  | chr1:209931251-209932089 |
| CA12      | chr15:63790566-63791331  |
| SLC4A7    | chr3:27521319-27522240   |
| PTRH1     | chr9:130482072-130482573 |
| GNA14     | chr9:80091094-80091893   |
| GPR56     | chr16:57622389-57629119  |
| ICOS      | chr2:204735016-204736349 |

|                |                           |
|----------------|---------------------------|
| RXFP4          | chr1:155916098-155916913  |
| NARG2          | chr15:60875400-60876780   |
| MAX            | chr14:65753685-65754352   |
| GCM1           | chr6:53096674-53097175    |
| TSPAN2         | chr1:115641629-115643205  |
| SERPIND1       | chr22:20911343-20912034   |
| CD247          | chr1:167486449-167487874  |
| CHRNA9         | chr4:40200925-40202457    |
| HERC1          | chr15:64183125-64187145   |
| ADARB1         | chr21:46498037-46499003   |
| DAD1           | chr14:22976227-22976728   |
| BZRAP1         | chr17:56421170-56422568   |
| COL3A1         | chr2:189848356-189849978  |
| ARHGAP25       | chr2:68964583-68965378    |
| ST8SIA4        | chr5:100224131-100228882  |
| ENSG0000016632 | chr17:55680085-55681365   |
| LRP8           | chr1:53877500-53879077    |
| PPAPDC3        | chr9:134107393-134115052  |
| JPH2           | chr20:42696859-42700417   |
| NDNF           | chr4:122101662-122104855  |
| CD300A         | chr17:72456189-72468245   |
| TM9SF2         | chr13:100004564-100005065 |
| SLC35D2        | chr9:99161198-99161699    |
| CD2            | chr1:117293783-117294284  |
| PTPN22         | chr1:114409832-114418604  |
| ATP2B4         | chr1:203575533-203576885  |
| PYHIN1         | chr1:158898831-158905026  |
| SEMA4C         | chr2:97578809-97579600    |
| ZNF750         | chr17:80842766-80844381   |
| CHIA           | chr1:111754555-111772794  |
| FAM159A        | chr1:53096959-53104969    |
| FLI1           | chr11:128494578-128495716 |
| PTPN6          | chr12:7058161-7058662     |
| IL7R           | chr5:35849869-35864252    |
| ZFP3           | chr17:4948010-4955044     |
| BCL11B         | chr14:99691943-99692773   |
| NOL11          | chr17:65432046-65432547   |
| SMPD3          | chr16:68449932-68452548   |
| CD6            | chr11:60738983-60740580   |
| MXD4           | chr4:2292290-2293701      |
| DDX28          | chr16:68104167-68104668   |
| CD3G           | chr11:118203704-118219102 |
| ETS1           | chr11:128173176-128173677 |
| CLEC12A        | chr12:10101366-10101867   |
| TUBGCP5        | chr15:22459491-22469012   |
| ZNF326         | chr1:90320406-90321047    |
| XCL2           | chr1:168408708-168409209  |
| FAR2           | chr12:29255144-29258680   |
| TPST2          | chr22:26988450-26988951   |
| TNRC6C         | chr17:75435395-75438444   |
| SLFN12L        | chr17:33863857-33865691   |
| GBP4           | chr1:89662859-89667606    |
| MREG           | chr2:216921259-216923918  |
| DPF3           | chr14:72917641-72918770   |
| ENSG0000026326 | chr19:7409061-7416913     |
| IQCA1          | chr2:237453109-237458665  |

|          |                           |
|----------|---------------------------|
| F2RL2    | chr5:75975493-75976414    |
| TBKBP1   | chr17:45736794-45738498   |
| STH      | chr17:44096663-44098892   |
| TRIB1    | chr8:126959012-126959513  |
| LRRRC8C  | chr1:90071762-90075039    |
| STMN1    | chr1:26316761-26317951    |
| ATP6V0E2 | chr7:149565507-149566226  |
| TBL1XR1  | chr3:177255706-177256962  |
| PLEKH01  | chr1:150081980-150083765  |
| CLCN4    | chrX:10079168-10079669    |
| SPN      | chr16:29673520-29677442   |
| HIF1A    | chr14:62136735-62138823   |
| LPIN2    | chr18:2959755-2962516     |
| TNFAIP3  | chr6:138226202-138226703  |
| UBXN11   | chr1:26640359-26649415    |
| PTPRC    | chr1:198607448-198607949  |
| SLC1A4   | chr2:64953187-64955715    |
| SCAF11   | chr12:46612282-46614577   |
| SLFN5    | chr17:33567399-33567900   |
| FOXP1    | chr3:71534090-71548628    |
| THSD7B   | chr2:136894357-136895685  |
| DPM2     | chr9:130782187-130797997  |
| DAD1     | chr14:23036296-23036797   |
| CACNA2D3 | chr3:54462879-54463781    |
| SLC25A15 | chr13:41351401-41352056   |
| TRAF3IP3 | chr1:209917955-209934392  |
| EPHB6    | chr7:142490731-142512086  |
| ACVR2A   | chr2:148419931-148422487  |
| CLIP1    | chr12:122936380-122939221 |
| PPP2R5E  | chr14:64116061-64119973   |
| ARID5A   | chr2:97010757-97011258    |
| STIM2    | chr4:26887850-26888516    |
| SAMSN1   | chr21:15961239-15966422   |
| MAT2B    | chr5:163341943-163344518  |
| GPR68    | chr14:91716015-91717882   |
| CCNJ     | chr10:97595339-97597959   |
| ZNRF2    | chr7:30360451-30362806    |
| STYX     | chr14:53206858-53212999   |
| FAM192A  | chr16:57168488-57169670   |
| MICALCL  | chr11:12214700-12230377   |
| TNRC6C   | chr17:75662055-75664746   |
| UCP2     | chr11:73706284-73706785   |
| SMCHD1   | chr18:2632691-2645506     |
| KDM8     | chr16:27210440-27211810   |
| ADPGK    | chr15:73031454-73033658   |
| CDR2     | chr16:22368253-22368754   |
| ATP2B1   | chr12:90255073-90260047   |
| ADAM19   | chr5:156997729-156998896  |
| IPCEF1   | chr6:154561441-154572436  |
| TMPPE    | chr3:33101537-33102038    |
| FAM105B  | chr5:14590259-14599435    |
| CARD11   | chr7:3083047-3083994      |
| LYRM4    | chr6:5173355-5176598      |
| SAMHD1   | chr20:35642143-35645654   |
| NMRAL1   | chr16:4538439-4539333     |
| ALPP     | chr2:233174928-233175839  |

|          |                           |
|----------|---------------------------|
| HIF1A    | chr14:61799211-61801737   |
| MED9     | chr17:17305800-17310022   |
| ZNF747   | chr16:30563514-30564015   |
| HKDC1    | chr10:70963128-70963629   |
| GNAQ     | chr9:80815941-80816442    |
| ZADH2    | chr18:72705029-72709181   |
| MRPL17   | chr11:6763112-6769860     |
| IL2RB    | chr22:37566270-37566953   |
| ZSCAN2   | chr15:85139855-85142966   |
| PSD4     | chr2:113926159-113926660  |
| PLEKHG7  | chr12:92985240-93000594   |
| IKZF1    | chr7:50342941-50362900    |
| ZNF800   | chr7:127054339-127054973  |
| ZBTB7A   | chr19:4109114-4109777     |
| DHRX     | chrX:2595195-2595696      |
| CNTRL    | chr9:123894539-123896353  |
| BCL6     | chr3:187716257-187719873  |
| LY9      | chr1:160764732-160771637  |
| TBL1XR1  | chr3:177254529-177258762  |
| GLRX     | chr5:95204076-95207203    |
| HIVEP2   | chr6:143176425-143177124  |
| ARHGAP25 | chr2:68991151-68992164    |
| LPIN2    | chr18:3058772-3059273     |
| SLC39A11 | chr17:70722973-70723474   |
| UTRN     | chr6:144674295-144675812  |
| ETS1     | chr11:128385873-128386374 |
| GPR68    | chr14:91692704-91693427   |
| C2orf71  | chr2:29233765-29235603    |
| LAT      | chr16:29020169-29020797   |
| SPG11    | chr15:44958344-44958984   |
| EFCAB4B  | chr12:3979361-3979862     |
| TBC1D14  | chr4:6900194-6902707      |
| AMICA1   | chr11:118098395-118099171 |
| CDC42EP3 | chr2:37842878-37843979    |
| RBPJ     | chr4:25939828-25940690    |
| FAM9C    | chrX:13031697-13032332    |
| NDUFV2   | chr18:9082843-9084673     |
| SH3RF3   | chr2:109646233-109651772  |
| RNF149   | chr2:101977799-101978430  |
| SIX2     | chr2:45405554-45406055    |
| SCN2B    | chr11:118071015-118105812 |
| LRRC16A  | chr6:25033348-25044521    |
| RICTOR   | chr5:39188764-39189265    |
| IL20     | chr1:206976974-206977631  |
| MLN      | chr6:33870147-33876929    |
| FAM69A   | chr1:93507272-93508960    |
| AMIGO2   | chr12:47700588-47701955   |
| EMB      | chr5:49885070-49891998    |
| KCTD10   | chr12:109873494-109873995 |
| GBP1     | chr1:89533450-89537026    |
| OR4D2    | chr17:56234433-56234934   |
| TNF      | chr6:31539866-31540797    |
| OASL     | chr12:121470323-121477632 |
| MRPS6    | chr21:35347901-35349927   |
| LAX1     | chr1:203733078-203733579  |
| APLF     | chr2:68616021-68616522    |



|          |                           |
|----------|---------------------------|
| SH3RF3   | chr2:109964637-109966452  |
| EPYC     | chr12:91430612-91431113   |
| GATA3    | chr10:8444637-8445138     |
| MRPS6    | chr21:35319456-35324763   |
| EPB41    | chr1:29253778-29254446    |
| DCN      | chr12:92420381-92432040   |
| ASMT     | chrX:1775688-1777717      |
| IL21R    | chr16:27412749-27414054   |
| C2orf40  | chr2:106709037-106715154  |
| FAM9C    | chrX:13092201-13115852    |
| DNAJB6   | chr7:157264721-157265222  |
| HIF1A    | chr14:61796735-61797590   |
| TIGIT    | chr3:114014964-114015930  |
| IFT81    | chr12:110516365-110518586 |
| VOPP1    | chr7:55598922-55607522    |
| CYP11A1  | chr15:74687650-74697107   |
| SULF2    | chr20:47336295-47336796   |
| TMEM121  | chr14:106470950-106472555 |
| PIP4K2A  | chr10:22970858-22971359   |
| FOXO1    | chr13:41057338-41062331   |
| VRK1     | chr14:97427845-97431184   |
| NLRC5    | chr16:57066454-57081705   |
| RHOH     | chr4:40198251-40200193    |
| CDK18    | chr1:205409695-205410495  |
| P2RY2    | chr11:72868217-72869496   |
| CD244    | chr1:160805499-160810013  |
| PDE4A    | chr19:10519100-10520700   |
| CCDC66   | chr3:56832880-56833671    |
| SLAMF6   | chr1:160487607-160494741  |
| CRTAM    | chr11:122596830-122600108 |
| RNF103   | chr2:86810180-86812518    |
| DAD1     | chr14:23037694-23038479   |
| SRR      | chr17:2169074-2169575     |
| PEX13    | chr2:61218873-61221232    |
| INPP4B   | chr4:143338090-143338719  |
| SLFN5    | chr17:33538391-33549200   |
| DHX35    | chr20:38252495-38253496   |
| HIF1A    | chr14:61793291-61795749   |
| ANTXR2   | chr4:81094209-81094844    |
| AGAP10   | chr10:47640140-47640775   |
| IQGAP2   | chr5:75621802-75622702    |
| DBH      | chr9:136541673-136542174  |
| TNFAIP8  | chr5:118676150-118677240  |
| DGKD     | chr2:234330749-234331250  |
| STARD5   | chr15:81583807-81586997   |
| CCDC167  | chr6:37469955-37470709    |
| ZAP70    | chr2:98333447-98334847    |
| TMPRSS4  | chr11:117843157-117888557 |
| CYP4F3   | chr19:15624554-15626696   |
| SLC9A3R1 | chr17:72737675-72738176   |
| SSR3     | chr3:156199087-156204885  |
| TMPPE    | chr3:33082420-33106830    |
| DNMT3A   | chr2:25781088-25781938    |
| SLAMF6   | chr1:160490129-160490630  |
| PAQR8    | chr6:52169399-52171360    |
| GFI1     | chr1:92950756-92951421    |

|           |                           |
|-----------|---------------------------|
| CITED2    | chr6:139851698-139852199  |
| PIM3      | chr22:50319147-50320049   |
| ARHGEF6   | chrX:135860321-135864451  |
| RGCC      | chr13:42064994-42069697   |
| SCN2B     | chr11:118086346-118086847 |
| RAB11FIP4 | chr17:29821753-29822254   |
| RPH3AL    | chr17:266073-266704       |
| ST8SIA4   | chr5:100225324-100226967  |
| ETS1      | chr11:128347116-128347617 |
| SLFN12L   | chr17:33857247-33871500   |
| SLC39A10  | chr2:196420577-196431626  |
| BCKDHB    | chr6:81134282-81134783    |
| CLASP1    | chr2:122455932-122459813  |
| MAF       | chr16:79320394-79320895   |
| CDC42EP3  | chr2:37826887-37828247    |
| PTPRC     | chr1:198608740-198610199  |
| AICDA     | chr12:8797183-8797684     |
| TULP1     | chr6:35579219-35579720    |
| C1GALT1   | chr7:7296546-7299967      |
| ATP6V0E2  | chr7:149562190-149563385  |
| ARHGAP9   | chr12:57869128-57876120   |
| DNAH14    | chr1:224811481-224811982  |
| TBC1D4    | chr13:75900309-75900810   |
| HIF1A     | chr14:61918311-61918812   |
| ITGAE     | chr17:3666922-3667423     |
| FOXJ1     | chr17:74139160-74143488   |
| SCARF2    | chr22:20817760-20818999   |
| VRK1      | chr14:98069609-98071417   |
| GBP1      | chr1:89534344-89536161    |
| JPH4      | chr14:24078372-24081567   |
| RFFL      | chr17:33376821-33380645   |
| MAN2A1    | chr5:109389561-109390062  |
| HENMT1    | chr1:109187595-109188237  |
| JPH2      | chr20:42697351-42697852   |
| GPR12     | chr13:27295920-27296421   |
| RPL7L1    | chr6:42742356-42744208    |
| CHODL     | chr21:19155924-19156717   |
| PLXNC1    | chr12:94601724-94602225   |
| ANKRD11   | chr16:89550297-89550934   |
| AKAP13    | chr15:85859455-85860223   |
| SIPA1L3   | chr19:38539307-38539962   |
| PRR5L     | chr11:36397309-36399617   |
| DAZL      | chr3:16883801-16884863    |
| SLFN12L   | chr17:33813420-33815965   |
| DRD3      | chr3:113932074-113933947  |
| ARHGAP9   | chr12:57869708-57874867   |
| ID4       | chr6:19719654-19720155    |
| FYN       | chr6:112348470-112348971  |
| AMZ2      | chr17:66180308-66180809   |
| SKAP1     | chr17:46506909-46507557   |
| TATDN2    | chr3:10282465-10286253    |
| SPN       | chr16:29611331-29612097   |
| WVOX      | chr16:78775328-78778182   |
| TLDC1     | chr16:84640908-84641619   |
| EPPK1     | chr8:145002185-145003845  |
| ZNF276    | chr16:89827906-89828407   |

|          |                           |
|----------|---------------------------|
| RTKN2    | chr10:63998238-63998739   |
| KCNJ3    | chr2:154999804-155000305  |
| THBS1    | chr15:38962988-38963489   |
| FAM9C    | chrX:13105792-13106705    |
| EZR      | chr6:159463139-159465219  |
| TRABD2A  | chr2:85064872-85078493    |
| AIM2     | chr1:159035905-159040682  |
| ERMN     | chr2:158298305-158300545  |
| MEF2D    | chr1:156494515-156495016  |
| CDC7     | chr1:92014195-92014696    |
| TNFSF11  | chr13:42965584-42972633   |
| RGS1     | chr1:192486064-192486565  |
| ATF7IP   | chr12:14569533-14571583   |
| RPS6KA2  | chr6:167362904-167364731  |
| PTPN9    | chr15:75896512-75901528   |
| F2RL1    | chr5:76033283-76034726    |
| FBXO30   | chr6:146187712-146188213  |
| CDC42EP3 | chr2:37826192-37829797    |
| PDCD1    | chr2:242805171-242805672  |
| PSAPL1   | chr4:7828784-7830898      |
| TDGF1    | chr3:46578608-46582562    |
| LYZL2    | chr10:30994309-30994943   |
| ARHGEF1  | chr19:42390602-42391797   |
| SLAMF6   | chr1:160508130-160513413  |
| FAM3D    | chr3:59433521-59439773    |
| COL6A6   | chr3:130183678-130184341  |
| PTPN7    | chr1:202134305-202135131  |
| GPR151   | chr5:146173703-146174204  |
| GLI3     | chr7:42792929-42794131    |
| NONE     | chr9:31345779-31349338    |
| CCR6     | chr6:167454102-167457063  |
| SMPD3    | chr16:68449707-68453773   |
| ITGB1    | chr10:33424800-33425458   |
| RNF138   | chr18:29618159-29624355   |
| PBX4     | chr19:19708560-19709264   |
| EPHB6    | chr7:142507272-142507773  |
| MKI67    | chr10:129894103-129894604 |
| ACYP2    | chr2:54221418-54221919    |
| PDSS1    | chr10:26724566-26732012   |
| THEM5    | chr1:151877519-151878918  |
| ASMTL    | chrX:1581757-1582576      |
| GADL1    | chr3:31267044-31268226    |
| SLAMF6   | chr1:160525293-160552445  |
| VOPP1    | chr7:55600132-55602789    |
| EZR      | chr6:159458726-159467254  |
| KCNA2    | chr1:111172870-111192842  |
| TFRC     | chr3:195906030-195908480  |
| DYRK2    | chr12:68021971-68027093   |
| RICTOR   | chr5:39192766-39193267    |
| PTGFRN   | chr1:117293188-117316085  |
| NEK6     | chr9:126963640-126966262  |
| SPATS2L  | chr2:201248181-201248682  |
| ASMTL    | chrX:1600072-1601051      |
| HDLBP    | chr2:242248743-242249388  |
| SIPA1L2  | chr1:232664947-232665448  |
| ADORA2A  | chr22:24822945-24824702   |

|          |                           |
|----------|---------------------------|
| ZNF157   | chrX:47221156-47222272    |
| BACE1    | chr11:117150993-117152238 |
| NONE     | chr14:98651278-98651779   |
| IKZF1    | chr7:50351130-50352696    |
| TRAF3IP2 | chr6:112071789-112076745  |
| SLITRK1  | chr13:84711261-84711924   |
| TIGD2    | chr4:90214292-90215155    |
| SNX20    | chr16:50714819-50715641   |
| FBN3     | chr19:8256936-8261756     |
| CD3D     | chr11:118208937-118210059 |
| C9orf89  | chr9:95825246-95825747    |
| SLA      | chr8:133991773-133992516  |
| DNASE1   | chr16:3675767-3676268     |
| LRRC16A  | chr6:25056040-25057735    |
| SOS1     | chr2:39353595-39356005    |
| ADCK3    | chr1:227070339-227070975  |
| REL      | chr2:61046229-61046730    |
| OR4B1    | chr11:48025676-48028082   |
| SLC9A3R1 | chr17:72732404-72742092   |
| EZR      | chr6:159461621-159462122  |
| MPRIIP   | chr17:16890267-16894099   |
| THEMIS   | chr6:128272832-128273333  |
| TMPRSS13 | chr11:117840867-117841648 |
| NPAS1    | chr19:47470788-47471945   |
| PRKAR2B  | chr7:106506997-106507498  |
| SPOCD1   | chr1:32292438-32292939    |
| PCBP1    | chr2:70329991-70333689    |
| FRMD4A   | chr10:14629416-14631042   |
| ABHD3    | chr18:19262299-19263469   |
| FASLG    | chr1:172786752-172790128  |
| KCNG1    | chr20:50021488-50022271   |
| CTLA4    | chr2:204731153-204731853  |
| MBNL1    | chr3:151909609-151924310  |
| NCALD    | chr8:103064386-103064887  |
| SLA      | chr8:134057834-134091103  |
| APH1B    | chr15:63485527-63486245   |
| GAS7     | chr17:10170744-10171245   |
| SCML4    | chr6:108061753-108062987  |
| SASH3    | chrX:128901231-128920164  |
| CD2      | chr1:117296318-117296956  |
| FNDC1    | chr6:159484365-159484866  |
| STAT4    | chr2:192070833-192071334  |
| SAE1     | chr19:47679359-47681411   |
| PSTPIP1  | chr15:77285744-77286245   |
| SORL1    | chr11:121320419-121320920 |
| KCNA2    | chr1:111174613-111175114  |
| ATXN1    | chr6:16699321-16701278    |
| TMEM75   | chr8:129549065-129557723  |
| GPR174   | chrX:78351674-78352175    |
| STARD3NL | chr7:38399373-38399874    |
| USP20    | chr9:132650322-132651608  |
| SH2D4A   | chr8:19302336-19302837    |
| DST      | chr6:56803093-56803594    |
| PSMD6    | chr3:63953107-63955317    |
| CHODL    | chr21:19165596-19167125   |
| IL7R     | chr5:35859343-35859844    |

|                |                           |
|----------------|---------------------------|
| TRIB1          | chr8:126648207-126652139  |
| CHRNA9         | chr4:40309483-40310341    |
| DNAJB12        | chr10:74086678-74087179   |
| IKZF1          | chr7:50347582-50349477    |
| PSD4           | chr2:113928945-113934800  |
| PDK1           | chr2:173360212-173361032  |
| MICALCL        | chr11:12244857-12247030   |
| PTGER4         | chr5:39775909-39776740    |
| C5orf42        | chr5:37197191-37199020    |
| MBOAT1         | chr6:20318956-20321183    |
| TIGIT          | chr3:114010071-114010572  |
| ITGB1          | chr10:33395753-33429250   |
| KCTD7          | chr7:65760309-65760958    |
| LCLAT1         | chr2:30555104-30561724    |
| C2orf71        | chr2:29237027-29239404    |
| ACAP1          | chr17:7238186-7242037     |
| ZAP70          | chr2:98328731-98337931    |
| LINGO1         | chr15:78338845-78345380   |
| TMEM75         | chr8:128987336-128989016  |
| ARHGEF3        | chr3:56950039-56952371    |
| RFFL           | chr17:33373478-33374153   |
| PRF1           | chr10:72361671-72363417   |
| TRIB2          | chr2:12637607-12645285    |
| TNFRSF1B       | chr1:12147272-12150206    |
| GALM           | chr2:38893187-38895506    |
| C1QTNF9        | chr13:24823698-24830525   |
| CRYBA4         | chr22:27038505-27039006   |
| FAM83D         | chr20:37500963-37503575   |
| GSG1L          | chr16:28152386-28154206   |
| CRTAM          | chr11:122611373-122621267 |
| CCDC80         | chr3:112388624-112398119  |
| DUSP4          | chr8:29356670-29357432    |
| LYRM4          | chr6:5174537-5175551      |
| PAQR8          | chr6:52171951-52173363    |
| AAK1           | chr2:69875430-69875931    |
| PRMT7          | chr16:68390534-68391035   |
| SLC2A4RG       | chr20:62381022-62383422   |
| FAM187B        | chr19:35696310-35696811   |
| FBLN7          | chr2:112914158-112914659  |
| MVD            | chr16:88746842-88749461   |
| ICAM3          | chr19:10449552-10450587   |
| CITED2         | chr6:139859226-139862674  |
| FOXO1          | chr13:40779782-40781809   |
| STAT4          | chr2:192065430-192073329  |
| ICAM3          | chr19:10449189-10451326   |
| MBOAT1         | chr6:20367549-20368199    |
| YIPF5          | chr5:143565113-143572110  |
| XCL2           | chr1:168437139-168440735  |
| MAP3K7CL       | chr21:30451866-30453177   |
| TRIM14         | chr9:100866057-100867338  |
| MRPS6          | chr21:35304069-35306039   |
| RRM1           | chr11:3970072-3970573     |
| MBNL1          | chr3:151957200-151966346  |
| ENSG0000026326 | chr19:7414024-7414786     |
| NDNF           | chr4:122102262-122103737  |
| MTMR2          | chr11:95989176-95993871   |

|          |                           |
|----------|---------------------------|
| GGA1     | chr22:38001124-38001625   |
| BICD1    | chr12:32038448-32054118   |
| LRRC16A  | chr6:25027814-25028315    |
| FASLG    | chr1:172626785-172633865  |
| FAM159A  | chr1:53103517-53104018    |
| ARL4C    | chr2:235335081-235336717  |
| APOBEC4  | chr1:183925043-183926676  |
| LRRC37A3 | chr17:62965408-62966073   |
| GPR65    | chr14:88471473-88472796   |
| ERMN     | chr2:158266785-158278917  |
| COX7A2L  | chr2:42524254-42524964    |
| ASNSD1   | chr2:190522649-190523366  |
| RANBP9   | chr6:13687747-13688248    |
| MAPKAPK2 | chr1:206889632-206890133  |
| UXS1     | chr2:106776072-106777906  |
| SEMA4C   | chr2:97628414-97628915    |
| ZNF683   | chr1:26699144-26699793    |
| IL2RB    | chr22:37559569-37560588   |
| CECR5    | chr22:17697120-17697621   |
| CLASP1   | chr2:122456522-122458761  |
| SIPA1L1  | chr14:71463577-71469265   |
| TNFAIP8  | chr5:118607470-118607971  |
| CSF2     | chr5:131438081-131440256  |
| EMCN     | chr4:101941553-101942999  |
| COX6C    | chr8:100509977-100513092  |
| SFRP2    | chr4:154860927-154861428  |
| SERPINE3 | chr13:51488536-51489954   |
| SOS1     | chr2:39353609-39358413    |
| B2M      | chr15:44975470-44976486   |
| GPR56    | chr16:57626078-57627652   |
| PIK3CD   | chr1:9688640-9690647      |
| EPHB6    | chr7:142502051-142503604  |
| PTPN7    | chr1:202126849-202135868  |
| FAR1     | chr11:13943869-13947741   |
| IFNAR2   | chr21:34587697-34588198   |
| AMIGO2   | chr12:47664503-47665004   |
| ZBP1     | chr20:56192502-56200138   |
| SLFN12L  | chr17:33849412-33849913   |
| FOXP1    | chr3:71503771-71505762    |
| KLRG1    | chr12:9142227-9142728     |
| ENTPD6   | chr20:25071908-25072409   |
| ADRA1D   | chr20:4645257-4647210     |
| ST6GAL1  | chr3:186626931-186627432  |
| IRF2     | chr4:185434290-185438004  |
| ADAMTS9  | chr3:65006279-65006780    |
| CHRNA9   | chr4:40232853-40233819    |
| RALGPS1  | chr9:129767260-129767761  |
| CCDC167  | chr6:37483145-37485460    |
| NFKB2    | chr10:104059867-104060560 |
| CDYL2    | chr16:81029734-81032284   |
| FAR1     | chr11:13950821-13951499   |
| PREX1    | chr20:47435037-47435538   |
| LCP1     | chr13:46867725-46872799   |
| GBP4     | chr1:89736848-89737536    |
| MAN1C1   | chr1:25887642-25889625    |
| ATP5SL   | chr19:42050144-42065104   |

|          |                           |
|----------|---------------------------|
| ADORA3   | chr1:112133228-112149695  |
| CMTM7    | chr3:32474279-32475384    |
| FBLN7    | chr2:112945868-112946369  |
| RICTOR   | chr5:39213446-39213947    |
| TIGD2    | chr4:90226529-90227167    |
| CD180    | chr5:67196845-67197346    |
| MDFIC    | chr7:114566155-114566656  |
| KIFC1    | chr6:33311931-33313351    |
| FRMD6    | chr14:51772074-51773513   |
| STK17B   | chr2:197121639-197136983  |
| FGF9     | chr13:22633572-22638459   |
| SEL1L3   | chr4:25860794-25862387    |
| NRN1     | chr6:5830808-5833715      |
| MAP3K15  | chrX:19816791-19818942    |
| LPIN2    | chr18:2971100-2972839     |
| FAM187B  | chr19:35693779-35709585   |
| TLDC1    | chr16:84547957-84549382   |
| MGAT4A   | chr2:99388111-99389937    |
| SESN3    | chr11:95430645-95434291   |
| FAM110C  | chr2:33900-34401          |
| NPAS1    | chr19:47457133-47459732   |
| GPR68    | chr14:91784415-91785044   |
| USP35    | chr11:77912832-77913465   |
| UBAC2    | chr13:99703885-99704635   |
| IL32     | chr16:3120078-3131692     |
| THEM5    | chr1:151867606-151872866  |
| FAR1     | chr11:13944601-13945246   |
| SLC25A15 | chr13:41349741-41353708   |
| TIMD4    | chr5:156339767-156342020  |
| FAR1     | chr11:13946289-13946790   |
| CCDC80   | chr3:112389248-112397485  |
| SART1    | chr11:65693529-65697384   |
| PRKCQ    | chr10:6621064-6623000     |
| MANF     | chr3:51061236-51064451    |
| PSTPIP1  | chr15:77295594-77296608   |
| CCDC70   | chr13:52398786-52400975   |
| ST8SIA1  | chr12:22548781-22550645   |
| PIP4K2A  | chr10:22938602-22939103   |
| DYRK2    | chr12:67876768-67877690   |
| FANK1    | chr10:127798899-127800050 |
| YPEL1    | chr22:22120734-22121386   |
| HSH2D    | chr19:16228794-16230348   |
| COL8A1   | chr3:99418862-99420000    |
| GSG1L    | chr16:28198021-28199458   |
| CDC42SE2 | chr5:130587621-130589312  |
| MRPS5    | chr2:95740424-95740925    |
| SNRK     | chr3:43235503-43236004    |
| ZBTB38   | chr3:141097344-141100252  |
| ABCG1    | chr21:43609807-43610308   |
| PTGFRN   | chr1:117297509-117298703  |
| ASH1L    | chr1:155435759-155436418  |
| SESN3    | chr11:95449281-95449782   |
| ID2      | chr2:8443744-8444428      |
| HS3ST3B1 | chr17:14330011-14333866   |
| MXD4     | chr4:2281953-2285001      |
| GBP6     | chr1:89775030-89777658    |

|                |                           |
|----------------|---------------------------|
| FAIM3          | chr1:207094442-207098810  |
| NUB1           | chr7:151048965-151049466  |
| USE1           | chr19:17293056-17296174   |
| RAPGEF1        | chr9:134606680-134612970  |
| DBX1           | chr11:20052987-20054032   |
| AAK1           | chr2:69920694-69921195    |
| IL7R           | chr5:35855454-35856090    |
| C2orf40        | chr2:106712177-106713445  |
| CHST7          | chrX:46446245-46448133    |
| HMHA1          | chr19:1074182-1076311     |
| EIF3G          | chr19:10252799-10254166   |
| DBH            | chr9:136547947-136549830  |
| SLC16A6        | chr17:66339766-66346288   |
| CA5A           | chr16:87989996-87990795   |
| PRR3           | chr6:30474233-30480285    |
| DYRK2          | chr12:68091191-68093726   |
| CSF1           | chr1:110343182-110347598  |
| PIK3R1         | chr5:66516633-66519870    |
| HIF1A          | chr14:61807069-61813075   |
| RUNX1          | chr21:36392479-36403492   |
| NINJ2          | chr12:672745-673246       |
| C5orf42        | chr5:37197930-37198431    |
| ATG16L1        | chr2:233939498-233941501  |
| DAD1           | chr14:22857423-22858383   |
| TTF2           | chr1:117544673-117546146  |
| ENSG0000026034 | chr16:18814731-18816483   |
| DUSP4          | chr8:29833040-29833541    |
| ZNF414         | chr19:8580670-8581171     |
| AOAH           | chr7:36756513-36767811    |
| PDE7A          | chr8:66854100-66869984    |
| PATL2          | chr15:44970033-44970534   |
| CNOT6L         | chr4:78774161-78776486    |
| GPR155         | chr2:175358245-175359565  |
| HIVEP2         | chr6:143163127-143164593  |
| CD3G           | chr11:118212908-118213779 |
| ATP6AP1L       | chr5:81608519-81609336    |
| PLEKHF1        | chr19:30114823-30115324   |
| EMB            | chr5:49888380-49889314    |
| PITRM1         | chr10:3800069-3800951     |
| ADAM12         | chr10:127835654-127836343 |
| FOXO1          | chr13:40962006-40964968   |
| HSF2           | chr6:122204219-122204720  |
| MLPH           | chr2:238340101-238351843  |
| CECR2          | chr22:17717419-17719055   |
| MBP            | chr18:74836671-74837172   |
| ZFP3           | chr17:4950396-4954089     |
| CTAG2          | chrX:153961606-153963263  |
| EPHB6          | chr7:142497341-142498047  |
| PDGFA          | chr7:657257-659330        |
| CHST11         | chr12:104870155-104882292 |
| ZFR            | chr5:32531419-32532877    |
| SUPT3H         | chr6:45891145-45891792    |
| ENSG0000018231 | chr8:8195478-8197159      |
| FAR2           | chr12:29256146-29257337   |
| TRIB1          | chr8:126957485-126966056  |
| CCR4           | chr3:33014976-33015796    |



|                 |                           |
|-----------------|---------------------------|
| GNPDA1          | chr5:141395822-141396323  |
| SNRNP200        | chr2:96980458-96983837    |
| MICALCL         | chr11:12218072-12218573   |
| BCOR            | chrX:39713818-39715396    |
| TNN             | chr1:175177758-175178259  |
| ETS1            | chr11:128194172-128194969 |
| STRBP           | chr9:126084675-126085622  |
| RICTOR          | chr5:39173027-39220833    |
| KIAA1919        | chr6:111549510-111550011  |
| F2RL2           | chr5:75973702-75974988    |
| PIGL            | chr17:16170107-16172747   |
| GZMA            | chr5:54332974-54333602    |
| ZFP69B          | chr1:40844746-40847547    |
| DYRK2           | chr12:68091990-68093152   |
| GMEB2           | chr20:62265922-62267267   |
| SPNS2           | chr17:4388865-4390340     |
| ARL4C           | chr2:235196873-235205951  |
| ABCC1           | chr16:16126808-16127309   |
| TUBGCP5         | chr15:22445614-22453931   |
| ARID5A          | chr2:97009422-97010071    |
| OR4B1           | chr11:48034201-48035374   |
| PGAP1           | chr2:198170484-198173450  |
| RSL24D1         | chr15:55559043-55560006   |
| ARHGAP15        | chr2:143886083-143886584  |
| CAB39           | chr2:231305297-231307076  |
| KRTAP19-8       | chr21:32554551-32555052   |
| TP53I11         | chr11:45122473-45125265   |
| SULF2           | chr20:47332942-47333841   |
| ACAD9           | chr3:128508122-128508623  |
| ORAI2           | chr7:102056151-102056652  |
| GNG2            | chr14:52313261-52314177   |
| NMRAL1          | chr16:4555584-4556245     |
| RMI2            | chr16:11404509-11405142   |
| ARHGAP18        | chr6:130068175-130073415  |
| RBL2            | chr16:53489755-53492488   |
| F12             | chr5:176839590-176840091  |
| ARHGAP15        | chr2:144281607-144284138  |
| THBS1           | chr15:38943467-38944498   |
| CRYBA4          | chr22:27054632-27055133   |
| AMIGO2          | chr12:47600678-47601179   |
| RICTOR          | chr5:39208697-39209198    |
| OR4B1           | chr11:48039222-48039723   |
| PPARD           | chr6:35276633-35282969    |
| TNRC6C          | chr17:75336707-75339513   |
| ENSG0000016632! | chr17:55676877-55677638   |
| S1PR1           | chr1:101575652-101578984  |
| LRRRC8C         | chr1:90076103-90076604    |
| CXCR6           | chr3:46007553-46008269    |
| PIK3R6          | chr17:8845326-8845827     |
| FOXN3           | chr14:90184634-90192312   |
| DUSP6           | chr12:89820641-89822471   |
| BTG1            | chr12:92792911-92793412   |
| S100B           | chr21:47978970-47979848   |
| ADSL            | chr22:40685578-40686242   |
| NONE            | chr14:98647084-98659551   |
| MREG            | chr2:216922170-216922892  |

|         |                           |
|---------|---------------------------|
| GLIPR1  | chr12:75872419-75876764   |
| OXNAD1  | chr3:16332275-16332938    |
| P2RY8   | chrX:1653183-1657697      |
| TAB2    | chr6:149475435-149475936  |
| PTGFRN  | chr1:117307482-117307983  |
| SUSD2   | chr22:24548939-24550337   |
| EML4    | chr2:42332412-42334799    |
| HEMK1   | chr3:50611254-50612498    |
| PFKFB3  | chr10:6388162-6393184     |
| ICA1    | chr7:8164568-8165578      |
| PLCB4   | chr20:9221385-9221886     |
| SDHAF1  | chr19:36443163-36446756   |
| GPHN    | chr14:66311903-66318377   |
| LMX1B   | chr9:129229031-129238583  |
| PEX14   | chr1:10569945-10572539    |
| MYSM1   | chr1:59184027-59185536    |
| IPCEF1  | chr6:154570378-154571017  |
| LAT     | chr16:28994606-29001991   |
| ECI2    | chr6:4732792-4735719      |
| GPR110  | chr6:47044236-47044737    |
| DUSP4   | chr8:29847294-29849464    |
| LRRRC8D | chr1:90187177-90187814    |
| FMN2    | chr1:239882577-239883078  |
| FN1     | chr2:216616377-216616878  |
| FAM9C   | chrX:13069405-13069906    |
| KANSL3  | chr2:97260776-97261277    |
| CDC42   | chr1:22345111-22346587    |
| ENPP5   | chr6:46292669-46294259    |
| SEMA4D  | chr9:92023754-92024453    |
| CYP4F3  | chr19:15625494-15626398   |
| EMB     | chr5:49890167-49890668    |
| CD58    | chr1:117057506-117058627  |
| AMZ2    | chr17:66179057-66179558   |
| GLIS1   | chr1:54231054-54233929    |
| KATNAL1 | chr13:30944080-30954087   |
| CHRNA1  | chr2:175703978-175713270  |
| DAD1    | chr14:23018339-23020276   |
| TMPRSS4 | chr11:117856418-117860816 |
| CLEC2D  | chr12:9825849-9827137     |
| PZP     | chr12:9516561-9517202     |
| BCL11B  | chr14:99397497-99399088   |
| PIK3CD  | chr1:9710618-9716680      |
| CPOX    | chr3:98282799-98283451    |
| PGAP1   | chr2:198160690-198161529  |
| ZNF618  | chr9:116279360-116280893  |
| NONE    | chr9:31346877-31347882    |
| SLX4    | chr16:3625185-3631587     |
| SLA2    | chr20:35274138-35274639   |
| JPH3    | chr16:87533217-87533718   |
| MPZL1   | chr1:167595787-167607716  |
| NTM     | chr11:132228092-132228593 |
| ADAM28  | chr8:23890611-23891112    |
| CHRNA9  | chr4:40206394-40206895    |
| HDAC9   | chr7:18547862-18549397    |
| TRIB1   | chr8:126933006-126948771  |
| DAD1    | chr14:23032417-23034145   |

|          |                           |
|----------|---------------------------|
| KCNG1    | chr20:50017142-50017643   |
| ICA1     | chr7:8173828-8174329      |
| HMCN1    | chr1:185408248-185409260  |
| HIVEP2   | chr6:143223440-143224690  |
| FERMT2   | chr14:53573890-53577548   |
| DCN      | chr12:92424055-92427545   |
| STK17B   | chr2:197041716-197042217  |
| RASAL3   | chr19:15571919-15579302   |
| HSF2     | chr6:122078191-122078895  |
| GBP4     | chr1:89663546-89665118    |
| EVI2B    | chr17:29647131-29647632   |
| IFT81    | chr12:110516863-110518176 |
| PPM1M    | chr3:52286885-52288492    |
| SLC35G3  | chr17:33546183-33547257   |
| AGR3     | chr7:17273361-17275296    |
| UBTD2    | chr5:171672554-171673055  |
| ZFAT     | chr8:136225004-136226187  |
| ASXL1    | chr20:31119677-31132027   |
| TIGD2    | chr4:90220340-90220982    |
| PGAP1    | chr2:198063319-198065309  |
| RTKN2    | chr10:63926624-63927125   |
| SASH3    | chrX:128914558-128915059  |
| LRIG3    | chr12:58931362-58932261   |
| AKR1E2   | chr10:4011199-4016909     |
| ARHGEF6  | chrX:135862596-135864454  |
| PDE7B    | chr6:136200282-136203366  |
| TOB1     | chr17:49106289-49108084   |
| KCNA2    | chr1:111190143-111190644  |
| ZAP70    | chr2:98329073-98330911    |
| TNFRSF1B | chr1:12127902-12128403    |
| RGS14    | chr5:176784152-176785840  |
| RALA     | chr7:39628655-39633451    |
| HOPX     | chr4:57621696-57625737    |
| EPC1     | chr10:32701970-32702471   |
| NAMPT    | chr7:106356176-106361973  |
| GPR68    | chr14:91707512-91712142   |
| XCR1     | chr3:46148996-46149692    |
| ID2      | chr2:8612552-8613053      |
| SYNC     | chr1:33264004-33264505    |
| CD3D     | chr11:118214800-118215472 |
| FAM83D   | chr20:37498457-37506686   |
| CCZ1B    | chr7:7196804-7197964      |
| THBS2    | chr6:169487100-169488224  |
| GRAMD1A  | chr19:35488418-35489060   |
| UTRN     | chr6:144669912-144673492  |
| VAV3     | chr1:108370910-108371411  |
| LRTM1    | chr3:54906997-54917670    |
| PPTC7    | chr12:111043064-111044277 |
| RGS17    | chr6:153489298-153489953  |
| PIK3CG   | chr7:106504881-106505570  |
| HENMT1   | chr1:109188834-109190433  |
| ST6GAL1  | chr3:186626121-186628069  |
| GLIS1    | chr1:54121594-54122909    |
| NTMT1    | chr9:132032436-132034561  |
| CDC42SE2 | chr5:130545599-130546100  |
| DPEP2    | chr16:68031287-68036341   |

|                |                           |
|----------------|---------------------------|
| AOAH           | chr7:37382052-37382803    |
| MSN            | chrX:64916751-64919057    |
| PALLD          | chr4:169614242-169615870  |
| CALML3         | chr10:5631261-5632904     |
| SLA2           | chr20:35272366-35272867   |
| EVL            | chr14:100544724-100546062 |
| INPP5F         | chr10:121464307-121464808 |
| ENSG0000013460 | chrX:130946233-130948010  |
| CD5            | chr11:60809176-60809990   |
| MANF           | chr3:51062857-51063492    |
| GPR39          | chr2:132441922-132442423  |
| OR4E2          | chr14:22538883-22539384   |
| FAM9C          | chrX:13141281-13142437    |
| BID            | chr22:18260038-18260817   |
| PKP4           | chr2:158756283-158756976  |
| NEK10          | chr3:27399072-27402772    |
| SLC39A10       | chr2:196396671-196399347  |
| RNF122         | chr8:33410742-33413599    |
| RGCC           | chr13:41930948-41931449   |
| SIRPA          | chr20:1649320-1658244     |
| TTYH1          | chr19:54899661-54900576   |
| CD52           | chr1:26613296-26617940    |
| PDSS1          | chr10:27025729-27029300   |
| FASLG          | chr1:172665293-172675386  |
| RNASE10        | chr14:20943701-20947258   |
| KCNA2          | chr1:111186002-111186503  |
| LTB            | chr6:31548443-31550815    |
| TRIB1          | chr8:126962632-126963133  |
| SYTL3          | chr6:159141943-159142444  |
| LY75-CD302     | chr2:160853712-160854764  |
| TPRG1          | chr3:188848425-188851836  |
| EED            | chr11:85827610-85828245   |
| CD84           | chr1:160598771-160599721  |
| APOA1          | chr11:116719957-116727988 |
| SULF2          | chr20:46417632-46418133   |
| CHRNA1         | chr2:175708206-175709273  |
| AIM2           | chr1:159037143-159037644  |
| EFCAB10        | chr7:105489719-105490220  |
| HPCAL1         | chr2:10470778-10471789    |
| SKAP1          | chr17:46519420-46519921   |
| PSMC4          | chr19:40445123-40451514   |
| STK17B         | chr2:197132863-197133364  |
| LCP2           | chr5:169689249-169689987  |
| TMEM187        | chrX:153232894-153233395  |
| MAN2A1         | chr5:109193791-109194292  |
| ZADH2          | chr18:72706877-72707891   |
| PRDM1          | chr6:106562519-106563269  |
| DDX6           | chr11:118746640-118747508 |
| C17orf78       | chr17:35447119-35447774   |
| LCP2           | chr5:169720515-169721016  |
| WNK1           | chr12:782405-783276       |
| GBP6           | chr1:89751333-89753516    |
| ITGAL          | chr16:30479855-30489404   |
| CDH15          | chr16:89181874-89182573   |
| ARHGAP25       | chr2:68996618-68999428    |
| GPR18          | chr13:99947982-99948483   |

|            |                           |
|------------|---------------------------|
| STK17B     | chr2:197065316-197065996  |
| KLRG1      | chr12:9178255-9178756     |
| GATA3      | chr10:8286618-8287119     |
| GIMAP6     | chr7:150364920-150365421  |
| TNFAIP8L2  | chr1:151129391-151129892  |
| PTPN14     | chr1:214600997-214602001  |
| AMIGO2     | chr12:47753871-47755739   |
| GADD45G    | chr9:92079067-92079568    |
| STYX       | chr14:53208818-53210023   |
| ADAP1      | chr7:962161-964712        |
| MBNL1      | chr3:151914839-151919384  |
| PRKACB     | chr1:84607835-84613376    |
| TGFBR1     | chr9:101814091-101824288  |
| SNX6       | chr14:35133986-35136967   |
| BLVRA      | chr7:43697330-43700542    |
| FREM1      | chr9:15299248-15300624    |
| RTKN2      | chr10:64000422-64004302   |
| MAP3K8     | chr10:30818019-30818937   |
| TSPAN3     | chr15:77471615-77472374   |
| STK17B     | chr2:197124997-197125498  |
| SUSD3      | chr9:95725589-95728335    |
| DUSP6      | chr12:89821846-89822347   |
| SNX13      | chr7:17678693-17679702    |
| MAP7       | chr6:137108592-137110431  |
| IGLL5      | chr22:23161761-23163389   |
| FASLG      | chr1:172628278-172628911  |
| CSGALNACT1 | chr8:19576183-19577614    |
| TMEM65     | chr8:125283267-125284412  |
| INPP5A     | chr10:134194534-134196231 |
| CDC42EP3   | chr2:37849120-37855542    |
| DAD1       | chr14:23022330-23031622   |
| CD300A     | chr17:72462013-72464158   |
| ITGA4      | chr2:182168705-182179811  |
| PRKCQ      | chr10:6516191-6516692     |
| CADM3      | chr1:159059545-159062808  |
| PPIF       | chr10:81079772-81085129   |
| EED        | chr11:85848868-85856844   |
| CARNS1     | chr11:67176836-67177464   |
| ITGB1      | chr10:33404734-33407827   |
| DPM2       | chr9:130788582-130789831  |
| CDK5R1     | chr17:30828436-30834291   |
| STK17B     | chr2:197074734-197077541  |
| SLAMF8     | chr1:159792146-159800666  |
| FLI1       | chr11:128478903-128484080 |
| FAM49B     | chr8:130982633-130987614  |
| CD37       | chr19:49838153-49839389   |
| ATP2B1     | chr12:90256364-90258575   |
| CITED2     | chr6:139861298-139862041  |
| KLRG1      | chr12:9140405-9140906     |
| DLGAP5     | chr14:55799187-55799962   |
| LRRC16A    | chr6:25053538-25055164    |
| IVNS1ABP   | chr1:185536527-185537159  |
| LSP1       | chr11:1871855-1875813     |
| EZR        | chr6:159224801-159225910  |
| SMPD1      | chr11:6423458-6423959     |
| SLC4A11    | chr20:3400077-3402027     |

|          |                           |
|----------|---------------------------|
| CMTM7    | chr3:32465726-32466227    |
| GIMAP4   | chr7:150260044-150268124  |
| CDK1     | chr10:62578624-62579125   |
| PMEPA1   | chr20:56545343-56545997   |
| SFMBT2   | chr10:7519616-7528686     |
| TAOK3    | chr12:118797200-118797701 |
| UBL3     | chr13:30510104-30510605   |
| SLC12A2  | chr5:127149206-127150564  |
| APCDD1   | chr18:10073558-10074059   |
| ABHD12   | chr20:25304360-25304861   |
| ACKR4    | chr3:132286988-132287489  |
| ARHGAP25 | chr2:68992856-68995722    |
| LIPC     | chr15:58764786-58765977   |
| CMTM6    | chr3:32499080-32500432    |
| F2RL2    | chr5:75842283-75844758    |
| AMIGO2   | chr12:47609519-47610780   |
| LHFPL2   | chr5:77881596-77883429    |
| SAMHD1   | chr20:35602837-35603338   |
| EPHA4    | chr2:222382106-222383891  |
| TNFRSF1B | chr1:12221308-12222877    |
| AGAP2    | chr12:58135419-58136487   |
| CASZ1    | chr1:11025837-11026513    |
| SYNE2    | chr14:64226151-64226947   |
| GCNT1    | chr9:79229732-79230588    |
| CD52     | chr1:26641483-26641984    |
| SMCHD1   | chr18:2588682-2590761     |
| ZNF32    | chr10:44311877-44312378   |
| SAMSN1   | chr21:16047260-16050891   |
| FOXP3    | chr14:90146685-90149202   |
| FLI1     | chr11:128603322-128604264 |
| RHOF     | chr12:122224520-122228880 |
| PARN     | chr16:14603787-14605242   |
| CRHR2    | chr7:30765749-30768446    |
| TMC1     | chr9:75054554-75062095    |
| CCND2    | chr12:4003870-4008658     |
| THBS2    | chr6:170019191-170020736  |
| LMO7     | chr13:76859400-76860223   |
| GLI3     | chr7:42791698-42795097    |
| DUSP12   | chr1:161708004-161711605  |
| JAG1     | chr20:11123646-11124687   |
| MAP3K8   | chr10:30794255-30795116   |
| FCGR1B   | chr1:121257136-121262351  |
| FASLG    | chr1:172632226-172632727  |
| THBS1    | chr15:39916126-39918203   |
| DSG1     | chr18:28778560-28779061   |
| C1QTNF9  | chr13:24827786-24829054   |
| NEBL     | chr10:20912388-20913525   |
| KATNAL1  | chr13:30947579-30948080   |
| APOBEC3H | chr22:39493276-39493903   |
| CBX4     | chr17:77969611-77972598   |
| HMCN1    | chr1:185308119-185308620  |
| UBXN11   | chr1:26644172-26646140    |
| OXNAD1   | chr3:16343425-16345331    |
| PTPRC    | chr1:198651065-198653162  |
| GPR68    | chr14:91880955-91884180   |
| PLXDC1   | chr17:37246090-37257067   |

|          |                           |
|----------|---------------------------|
| ADAM12   | chr10:127930809-127932484 |
| CSNK1A1L | chr13:37798968-37800737   |
| RMDN3    | chr15:41036099-41037070   |
| CD53     | chr1:111415204-111415880  |
| TRABD2A  | chr2:85071941-85074628    |
| CD3E     | chr11:118186180-118187431 |
| TNFSF8   | chr9:117689447-117693995  |
| ARHGAP25 | chr2:68967175-68967841    |
| FAM9B    | chrX:9307448-9311441      |
| EVL      | chr14:100533068-100536429 |
| LRRRC8D  | chr1:90182852-90192017    |
| ADAMTSL1 | chr9:18360171-18360672    |
| SSTR3    | chr22:37637005-37640360   |
| GIMAP8   | chr7:150125550-150126222  |
| CDC42EP3 | chr2:37809545-37813942    |
| HAVCR1   | chr5:156535129-156535901  |
| PCBP1    | chr2:70330605-70332141    |
| SLC1A4   | chr2:64926131-64927874    |
| CELF2    | chr10:11187250-11187751   |
| SAMHD1   | chr20:35636634-35637135   |
| TCF4     | chr18:53536252-53537021   |
| PTPRM    | chr18:7204666-7205461     |
| ARHGAP25 | chr2:68968849-68969350    |
| IRX6     | chr16:55149891-55151236   |
| INHBB    | chr2:121044735-121045476  |
| SRGN     | chr10:70803731-70806455   |
| C1QB     | chr1:22978459-22978960    |
| XCR1     | chr3:46150305-46151294    |
| DNAJC15  | chr13:43564100-43569134   |
| CECR5    | chr22:17696571-17703054   |
| GORAB    | chr1:170173600-170174446  |
| PLEK     | chr2:68592258-68592759    |
| SDK1     | chr7:3129182-3136604      |
| ACKR5    | chr3:46408905-46417720    |
| SLC25A33 | chr1:9486581-9487482      |
| TFRC     | chr3:195910246-195910747  |
| PIN1     | chr19:9967241-9970172     |
| ARHGEF26 | chr3:152936518-152942323  |
| P2RY8    | chrX:1655321-1656376      |
| PSMD14   | chr2:162022207-162023500  |
| RUNX1    | chr21:36406263-36427151   |
| LMX1B    | chr9:129230274-129237609  |
| MBNL1    | chr3:151961600-151962236  |
| TMPRSS4  | chr11:117877390-117880215 |
| LCLAT1   | chr2:30559575-30560569    |
| ZNRF2    | chr7:30388158-30388812    |
| RNF187   | chr1:228667152-228667653  |
| ZFAT     | chr8:136223642-136224412  |
| MGAT5    | chr2:134988544-134994850  |
| CD70     | chr19:6655110-6655611     |
| DKK3     | chr11:12009598-12010245   |
| SPTBN5   | chr15:42228997-42230052   |
| DPYD     | chr1:98852323-98855930    |
| CD70     | chr19:6576545-6577387     |
| PPAPDC3  | chr9:134143574-134147585  |
| SAV1     | chr14:51278927-51280208   |

|           |                           |
|-----------|---------------------------|
| SGSM3     | chr22:40858473-40859587   |
| SASH3     | chrX:128893356-128894515  |
| TMTC4     | chr13:101959056-101959557 |
| FAM84B    | chr8:127510985-127514295  |
| SLAMF6    | chr1:160510255-160511141  |
| SOCS6     | chr18:68003102-68004600   |
| ANKRD20A1 | chr9:67301304-67302155    |
| GREM1     | chr15:33148551-33149679   |
| RPL39L    | chr3:186759226-186760482  |
| DPP7      | chr9:140021522-140022215  |
| FOXN3     | chr14:90188134-90188870   |
| CCDC66    | chr3:56813889-56826875    |
| ZNF414    | chr19:8632495-8632996     |
| ZNF474    | chr5:121465246-121465747  |
| IKZF1     | chr7:50343764-50346681    |
| GIMAP6    | chr7:150361703-150362204  |
| RNASEH2B  | chr13:50940042-50940543   |
| UBE2E1    | chr3:23803964-23805131    |
| SDCBP     | chr8:59517338-59517839    |
| TNRC6C    | chr17:75662622-75663123   |
| LRRC16A   | chr6:25035373-25036171    |
| GPR56     | chr16:57643415-57643916   |
| FOSL2     | chr2:28276111-28276612    |
| DAD1      | chr14:23035089-23035590   |
| TMTC4     | chr13:101480039-101480540 |
| NR5A2     | chr1:200123645-200124290  |
| P2RY2     | chr11:72864320-72865168   |
| PITRM1    | chr10:3783661-3784642     |
| BIN2      | chr12:51723199-51723700   |
| FN1       | chr2:216581650-216583895  |
| COL3A1    | chr2:189850814-189852096  |
| LRRC16A   | chr6:25041084-25042691    |
| OASL      | chr12:121471310-121471811 |
| RNASE10   | chr14:20944626-20946940   |
| SNX6      | chr14:35134138-35136206   |
| GADL1     | chr3:31503169-31503930    |
| CCR6      | chr6:167454517-167455018  |
| MDM1      | chr12:68871037-68878201   |
| BARX2     | chr11:129118757-129120358 |
| BIN2      | chr12:51709879-51724361   |
| FAT4      | chr4:126188374-126189068  |
| TRABD2A   | chr2:85060003-85061161    |
| RIN2      | chr20:19792941-19798150   |
| COPB2     | chr3:139024880-139030320  |
| SAG       | chr2:234176788-234177289  |
| PDZK1     | chr1:145743980-145744481  |
| NTPCR     | chr1:233057937-233059362  |
| PTPN7     | chr1:202132302-202132803  |
| ORAI2     | chr7:102066197-102067625  |
| PBX4      | chr19:19709998-19710499   |
| CELF2     | chr10:11218318-11218819   |
| CLVS1     | chr8:61839281-61840828    |
| RUNX1     | chr21:36413341-36415795   |
| PIAS1     | chr15:68172322-68172951   |
| SH2D3C    | chr9:130539505-130542005  |
| KANK1     | chr9:444782-449138        |



|           |                           |
|-----------|---------------------------|
| SLC28A3   | chr9:86910074-86913355    |
| CAB39     | chr2:231508771-231509596  |
| IKZF1     | chr7:50298662-50311471    |
| SLC1A4    | chr2:64954026-64954527    |
| THUMPD3   | chr3:9322010-9322511      |
| RSL24D1   | chr15:55543051-55543832   |
| CCL5      | chr17:34227655-34228156   |
| PIK3R1    | chr5:66511138-66513599    |
| C7orf10   | chr7:40508504-40510155    |
| KIAA1549  | chr7:138779778-138780811  |
| NCF2      | chr1:183561991-183562492  |
| ATP6V1G3  | chr1:198589387-198590610  |
| CSNK1A1L  | chr13:38169996-38173317   |
| PSTPIP1   | chr15:77280445-77281815   |
| ZNRF2     | chr7:30386904-30387545    |
| FZD1      | chr7:90793834-90794881    |
| SNX20     | chr16:50717484-50720271   |
| KRTAP16-1 | chr17:39462390-39467281   |
| WIPF1     | chr2:175497432-175501865  |
| SMAP2     | chr1:40807069-40808358    |
| KLF3      | chr4:38336857-38337358    |
| ZBTB21    | chr21:43480044-43485545   |
| GPR162    | chr12:6897864-6902251     |
| MOCOS     | chr18:33737348-33738193   |
| GPR151    | chr5:146132172-146132673  |
| SSR3      | chr3:156207717-156208343  |
| ETV1      | chr7:13889228-13889896    |
| ZBTB7C    | chr18:45963614-45964115   |
| TUBGCP5   | chr15:22466075-22468518   |
| GIMAP6    | chr7:150357859-150369039  |
| CHRNA9    | chr4:40256449-40257076    |
| HSF2      | chr6:122147164-122147810  |
| PIK3CD    | chr1:9711563-9714935      |
| IL6R      | chr1:154310423-154310924  |
| PAPPA     | chr9:118377184-118379334  |
| TBL1XR1   | chr3:177837921-177838422  |
| ATP6AP1L  | chr5:81634815-81636753    |
| C6orf15   | chr6:31060551-31063270    |
| TNFSF8    | chr9:117692567-117693446  |
| COPB2     | chr3:139029359-139029860  |
| PROC      | chr2:128171027-128171528  |
| RNF122    | chr8:33411009-33413105    |
| CHIA      | chr1:111764498-111765595  |
| LIPC      | chr15:58678616-58680103   |
| RICTOR    | chr5:39187560-39188061    |
| TTLL7     | chr1:84156082-84156583    |
| HK1       | chr10:70988185-70988866   |
| GZMB      | chr14:25141121-25145077   |
| NCOA5     | chr20:44688618-44690216   |
| HUWE1     | chrX:53741668-53742169    |
| FOXJ1     | chr17:74140936-74142299   |
| TMPRSS4   | chr11:117886249-117887427 |
| CD53      | chr1:111416478-111418626  |
| AKAP5     | chr14:64911486-64912784   |
| ITGB1     | chr10:33398140-33401898   |
| CWC15     | chr11:94642642-94643949   |

|          |                           |
|----------|---------------------------|
| FAM9C    | chrX:13099744-13100840    |
| ITPK1    | chr14:93569642-93570143   |
| THBS1    | chr15:38988139-38988640   |
| PRDM1    | chr6:106603913-106606087  |
| DEPDC7   | chr11:33033300-33033945   |
| TPRG1    | chr3:188631495-188636324  |
| NPHP4    | chr1:6054048-6054874      |
| ZCCHC2   | chr18:60172981-60173482   |
| PTK2B    | chr8:27235644-27237360    |
| PIGC     | chr1:172307342-172316216  |
| TRIB1    | chr8:126649332-126650145  |
| IKZF1    | chr7:50305726-50306227    |
| VRK1     | chr14:98169486-98169987   |
| CRYBA4   | chr22:27044027-27044528   |
| SNTB1    | chr8:121741378-121748646  |
| TNFSF11  | chr13:42968598-42969452   |
| ERMN     | chr2:158274258-158276120  |
| IL10RA   | chr11:117821473-117822828 |
| C2orf40  | chr2:106412885-106416614  |
| TMPPE    | chr3:33096006-33096820    |
| TAB2     | chr6:149461157-149461658  |
| ANXA6    | chr5:150593230-150595837  |
| PLEK2    | chr14:67954483-67955783   |
| RNF44    | chr5:175956786-175957287  |
| RASSF5   | chr1:206729868-206733340  |
| SMAD5    | chr5:135372133-135373344  |
| TBC1D22A | chr22:47144601-47147165   |
| PIGC     | chr1:172148999-172152131  |
| HTR4     | chr5:148188024-148188525  |
| CSNK1A1L | chr13:37709894-37712375   |
| CSF1     | chr1:110344226-110346000  |
| CASD1    | chr7:94036043-94036544    |
| SEMA3C   | chr7:80791030-80791531    |
| LANCL2   | chr7:55376087-55376588    |
| LCLAT1   | chr2:30487147-30490315    |
| ATF7IP   | chr12:14538001-14539614   |
| DDX28    | chr16:68108153-68108654   |
| AIM2     | chr1:159043186-159048728  |
| GIMAP4   | chr7:150253513-150254014  |
| MOCOS    | chr18:33732542-33733043   |
| PPAPDC3  | chr9:134126704-134135828  |
| PHF21A   | chr11:46267045-46271623   |
| SELL     | chr1:169680426-169680927  |
| PSD4     | chr2:113930767-113932978  |
| PCED1B   | chr12:47298292-47299145   |
| NEB      | chr2:152494028-152494529  |
| VSTM4    | chr10:50352395-50354421   |
| MAP9     | chr4:156549148-156550458  |
| GBP6     | chr1:89827245-89831849    |
| ANXA13   | chr8:124849199-124853884  |
| B4GALT3  | chr1:161151319-161157417  |
| S1PR1    | chr1:101578106-101578607  |
| LPCAT1   | chr5:1789375-1795898      |
| KIAA1199 | chr15:81162705-81163206   |
| ATXN1    | chr6:16728355-16729836    |
| SMAGP    | chr12:51712654-51713282   |

|             |                           |
|-------------|---------------------------|
| TMSB4X      | chrX:13018146-13019217    |
| CUL3        | chr2:225821841-225822958  |
| DNAJC15     | chr13:43632047-43632898   |
| DUSP10      | chr1:221898815-221899873  |
| DYSF        | chr2:71644627-71645128    |
| EDNRA       | chr4:148281827-148284024  |
| CTCF        | chr16:67589195-67590936   |
| FAM9C       | chrX:13103436-13105141    |
| RUNX1       | chr21:37012739-37013240   |
| WWOX        | chr16:78776092-78776769   |
| F2R         | chr5:75955483-75956117    |
| DYRK2       | chr12:68023690-68025018   |
| S100P       | chr4:6690075-6692480      |
| TNFSF11     | chr13:42967058-42967698   |
| PLB1        | chr2:28646671-28647172    |
| CHURC1-FNTB | chr14:65394992-65395493   |
| DCN         | chr12:91708645-91713498   |
| KITLG       | chr12:89044152-89045417   |
| NMT2        | chr10:15249981-15251477   |
| HLA-DMB     | chr6:32911964-32912835    |
| PTTG1IP     | chr21:46333520-46335348   |
| IFNE        | chr9:21680366-21686718    |
| CALHM1      | chr10:105230300-105232013 |
| TAB2        | chr6:149551358-149557622  |
| RNASEH2B    | chr13:51465575-51469805   |
| PPP2R5C     | chr14:102188629-102189263 |
| ACAP1       | chr17:7239963-7240764     |
| MRPL17      | chr11:6766539-6768210     |
| SIPA1L1     | chr14:71466197-71467666   |
| C1orf162    | chr1:112013028-112013529  |
| PITPNB      | chr22:28538810-28540452   |
| COL3A1      | chr2:189856049-189862899  |
| USP20       | chr9:132631912-132632413  |
| CLIC3       | chr9:139894562-139895219  |
| TUBGCP5     | chr15:22449733-22450567   |
| PTPRZ1      | chr7:121184197-121185645  |
| TRHDE       | chr12:73141130-73141910   |
| MAFB        | chr20:38515064-38515691   |
| CLVS1       | chr8:61838170-61843650    |
| GPR155      | chr2:175460517-175465032  |
| IKZF1       | chr7:50301934-50302857    |
| PIP4K2A     | chr10:22934613-22936014   |
| CD5         | chr11:60793386-60794738   |
| SART1       | chr11:65694474-65695907   |
| FCGR1B      | chr1:121260703-121261387  |
| PIK3CD      | chr1:9776922-9778368      |
| LBR         | chr1:225653958-225656167  |
| TGFB3       | chr14:76343075-76343576   |
| HOPX        | chr4:57622789-57625576    |
| LMAN1L      | chr15:75074110-75083469   |
| NDUFB9      | chr8:125575256-125578424  |
| TYROBP      | chr19:36419209-36422953   |
| ABCC4       | chr13:96161938-96162589   |
| MTF2        | chr1:93446986-93447487    |
| LRRRC8D     | chr1:90218669-90229664    |
| CD84        | chr1:160548986-160549612  |

|          |                           |
|----------|---------------------------|
| CAB39    | chr2:231506997-231509833  |
| NTMT1    | chr9:131998492-131998993  |
| CELF2    | chr10:11204046-11209160   |
| HSF2     | chr6:122158702-122160134  |
| COL3A1   | chr2:189387725-189395323  |
| ADAM19   | chr5:156967355-156969338  |
| ABCG1    | chr21:43605998-43611152   |
| WISP1    | chr8:134083038-134084358  |
| VPS8     | chr3:184503096-184505521  |
| RUNX1    | chr21:36308859-36309360   |
| CCNJ     | chr10:97620605-97621106   |
| FBXW11   | chr5:171605036-171607740  |
| RBPJ     | chr4:26290427-26291113    |
| MRPL33   | chr2:27908755-27909256    |
| MDM1     | chr12:68872627-68877033   |
| NOL11    | chr17:65436176-65438146   |
| OMG      | chr17:29637698-29639301   |
| RNF19B   | chr1:33445965-33447953    |
| ICA1     | chr7:8213748-8219150      |
| GCNT4    | chr5:74537588-74538369    |
| USP31    | chr16:23092063-23095046   |
| TBX2     | chr17:59386382-59387521   |
| RAD18    | chr3:9222125-9222626      |
| BCL6     | chr3:187717924-187718679  |
| RGS1     | chr1:192519152-192520793  |
| CACNA1E  | chr1:181118982-181119608  |
| SMCHD1   | chr18:2634922-2638217     |
| ZNF652   | chr17:47465969-47466470   |
| TBXAS1   | chr7:139528078-139531666  |
| NONE     | chr14:98638329-98639153   |
| EED      | chr11:85849526-85850027   |
| SLC2A1   | chr1:43396614-43399694    |
| CRTAM    | chr11:122614420-122614921 |
| PMCH     | chr12:102561196-102561697 |
| TIAF1    | chr17:27465302-27468994   |
| SESN3    | chr11:94986664-94988917   |
| C20orf24 | chr20:35224095-35224869   |
| IL10     | chr1:206939312-206940143  |
| KCMF1    | chr2:85171555-85174890    |
| NID2     | chr14:52643158-52643659   |
| ADORA3   | chr1:112146664-112148018  |
| CDC42SE2 | chr5:130592567-130593418  |
| HEG1     | chr3:124826405-124826906  |
| ID2      | chr2:8661200-8661701      |
| ASXL1    | chr20:31123120-31124122   |
| GFRA2    | chr8:21769139-21771197    |
| PIGC     | chr1:172319475-172332300  |
| C10orf11 | chr10:78164095-78166401   |
| PDE7B    | chr6:136200531-136202097  |
| ARL4C    | chr2:235197830-235201580  |
| AMPD3    | chr11:10480678-10481435   |
| FAM49B   | chr8:130983733-130984234  |
| CASD1    | chr7:94037658-94043796    |
| FNDC1    | chr6:159482939-159483440  |
| DCBLD2   | chr3:99113261-99113762    |
| BPGM     | chr7:134301766-134304269  |

|                |                          |
|----------------|--------------------------|
| RGCC           | chr13:42066319-42067313  |
| SPNS2          | chr17:4389040-4389685    |
| ARHGAP18       | chr6:130069193-130072815 |
| SNTB1          | chr8:121760349-121761164 |
| PPAPDC3        | chr9:134054193-134055752 |
| VRK1           | chr14:98190114-98192030  |
| MYH9           | chr22:36828075-36829206  |
| TBC1D22A       | chr22:47186568-47187662  |
| CENPN          | chr16:81037482-81038387  |
| KRR1           | chr12:76337365-76339791  |
| RNASE6         | chr14:21247851-21253061  |
| FFAR2          | chr19:35953216-35953717  |
| SUN5           | chr20:31553030-31566543  |
| MBOAT1         | chr6:20320135-20320636   |
| GNGT2          | chr17:47285279-47297903  |
| SNTB1          | chr8:121868644-121870625 |
| COL3A1         | chr2:189869760-189870261 |
| ID2            | chr2:8617392-8618737     |
| FBN3           | chr19:8258451-8259943    |
| SAP30L         | chr5:153599282-153602859 |
| PIGC           | chr1:172320726-172321502 |
| SEMA4D         | chr9:92150440-92150941   |
| PSTPIP1        | chr15:77287142-77289634  |
| MSR1           | chr8:16219187-16219688   |
| DIAPH1         | chr5:141002974-141003621 |
| SLC1A2         | chr11:35352208-35352910  |
| TPBGL          | chr11:74986016-74988289  |
| TNFRSF1B       | chr1:12148033-12148534   |
| LMOD3          | chr3:69337524-69338025   |
| SLFN5          | chr17:33539397-33542138  |
| SCG2           | chr2:224463022-224463981 |
| ZNF414         | chr19:8631321-8644509    |
| PRDX6          | chr1:173300240-173300977 |
| USE1           | chr19:17294097-17295435  |
| CDK5R1         | chr17:30893082-30898662  |
| IQSEC1         | chr3:13455892-13456735   |
| CSK            | chr15:75069115-75070958  |
| APOBEC3H       | chr22:39485950-39488099  |
| TIGD2          | chr4:90237960-90238635   |
| PIGL           | chr17:16171101-16171779  |
| DPEP2          | chr16:68033940-68034441  |
| MYH9           | chr22:36801729-36802230  |
| MPP6           | chr7:24495595-24496096   |
| PRR5L          | chr11:36432656-36433640  |
| MTBP           | chr8:121609661-121611305 |
| RCS1           | chr1:167596776-167601750 |
| FOXF1          | chr16:85968427-85971417  |
| ENSG0000013460 | chrX:130946836-130947337 |
| EVI2A          | chr17:29648831-29649482  |
| CHST2          | chr3:142886498-142892124 |
| RUNX1          | chr21:36443951-36446436  |
| CYFIP2         | chr5:156679838-156680339 |
| SLX1A          | chr16:30193167-30199673  |
| TMEM86B        | chr19:55764793-55767341  |
| FAM180A        | chr7:135563684-135564185 |
| ZNF608         | chr5:124418956-124419457 |

|            |                           |
|------------|---------------------------|
| FAM9B      | chrX:9308169-9311316      |
| DNAJC18    | chr5:138778909-138779700  |
| SPP2       | chr2:234934191-234935513  |
| PEX13      | chr2:61188374-61190731    |
| CALD1      | chr7:134345052-134346865  |
| PALLD      | chr4:169522394-169522895  |
| PTPN7      | chr1:202128954-202131466  |
| LPP        | chr3:187494882-187495880  |
| AMIGO2     | chr12:47587182-47587683   |
| M6PR       | chr12:9104193-9104694     |
| FAM9C      | chrX:13108644-13110811    |
| TDRD10     | chr1:154434974-154436840  |
| WDR75      | chr2:190133693-190134194  |
| UCP2       | chr11:73691308-73692660   |
| TGFBR2     | chr3:30695583-30701665    |
| PET112     | chr4:153176804-153177305  |
| GIMAP2     | chr7:150381145-150385083  |
| FOXL1      | chr16:86698141-86698873   |
| GNG7       | chr19:2620363-2622154     |
| ZMIZ1      | chr10:80807285-80808803   |
| GAS1       | chr9:89894854-89896324    |
| PMEPA1     | chr20:56454096-56458027   |
| SALL4      | chr20:50647963-50648464   |
| TNN        | chr1:175041055-175043057  |
| EVI2B      | chr17:29633786-29650169   |
| PRG4       | chr1:185795187-185795819  |
| RAB27B     | chr18:52818244-52818745   |
| FBXW11     | chr5:171541732-171542233  |
| ADAM12     | chr10:127910902-127913512 |
| TRIB2      | chr2:12640610-12643109    |
| GNAL       | chr18:11324730-11326125   |
| RHBDD1     | chr2:227756431-227756932  |
| IL32       | chr16:3123625-3127344     |
| TNFAIP8    | chr5:118645072-118645573  |
| HIF1A      | chr14:62125660-62131456   |
| PPP1R2     | chr3:195277943-195279075  |
| PAPPA      | chr9:118089948-118090929  |
| UBL3       | chr13:30721843-30722344   |
| SPOCD1     | chr1:32354132-32356431    |
| SIRPG      | chr20:1637182-1638788     |
| HMHA1      | chr19:1066984-1069594     |
| RASSF3     | chr12:65062479-65065615   |
| ST20-MTHFS | chr15:80260773-80261274   |
| ZNF438     | chr10:31549911-31551624   |
| BICD1      | chr12:32049950-32051066   |
| ERMN       | chr2:158260402-158260903  |
| CAMK2G     | chr10:75652751-75653252   |
| RGS10      | chr10:121274499-121280048 |
| PRSS38     | chr1:227952684-227954863  |
| TNFSF18    | chr1:173174287-173174788  |
| ZFP69B     | chr1:40849047-40854096    |
| DCN        | chr12:91642427-91643273   |
| SLC14A1    | chr18:43267038-43267539   |
| RICTOR     | chr5:39201777-39202851    |
| APBB1IP    | chr10:26726483-26728913   |
| KERA       | chr12:91501297-91506012   |

|          |                           |
|----------|---------------------------|
| NCKAP1L  | chr12:54891525-54892026   |
| SLAMF1   | chr1:160673198-160684227  |
| DAOA     | chr13:105792122-105792623 |
| RGS10    | chr10:121261927-121262983 |
| TNFSF15  | chr9:117690791-117691438  |
| ZFAT     | chr8:136220380-136222406  |
| DCN      | chr12:91709164-91712418   |
| LCP1     | chr13:46870407-46871476   |
| LRIG3    | chr12:58924108-58925936   |
| ST3GAL5  | chr2:86221332-86221833    |
| COG6     | chr13:40526807-40527308   |
| STK17B   | chr2:197104119-197106571  |
| ICA1     | chr7:8171487-8172527      |
| BHLHE40  | chr3:4560807-4561555      |
| COL5A1   | chr9:137388497-137389354  |
| MLPH     | chr2:238340953-238345425  |
| DHX35    | chr20:37985591-37986490   |
| EMP1     | chr12:13500519-13501167   |
| CD244    | chr1:160807559-160808214  |
| PIN1     | chr19:9968456-9968957     |
| CYTH4    | chr22:37677463-37681142   |
| SLC16A6  | chr17:66342475-66342976   |
| EPYC     | chr12:91433164-91433665   |
| DNAJB6   | chr7:157094270-157095964  |
| SRR      | chr17:2162928-2163429     |
| PLCB2    | chr15:40597683-40602151   |
| FAM159A  | chr1:53102274-53102908    |
| CDK5R1   | chr17:30829829-30832833   |
| HNRNPLL  | chr2:38881488-38881989    |
| ABCG1    | chr21:43536976-43537477   |
| SLC2A4RG | chr20:62381934-62383078   |
| PPIF     | chr10:81076835-81078171   |
| FBXW11   | chr5:171601495-171603247  |
| LRFN3    | chr19:36421245-36422450   |
| ARHGAP12 | chr10:32034113-32035228   |
| EXOC2    | chr6:1113615-1117208      |
| ZNF507   | chr19:31868683-31869419   |
| FOXO1    | chr13:41060348-41060849   |
| ADO      | chr10:64393655-64401355   |
| ARHGAP25 | chr2:69001312-69002917    |
| MCAM     | chr11:119133841-119134342 |
| NSMAF    | chr8:59713297-59713978    |
| SYT16    | chr14:62605118-62606702   |
| TRAF3IP3 | chr1:209938298-209949596  |
| RUNX2    | chr6:45295697-45296380    |
| FAM198B  | chr4:159041323-159042433  |
| SFRP2    | chr4:154965437-154966636  |
| THEM5    | chr1:151870409-151871339  |
| TRIB1    | chr8:126524937-126527141  |
| SAMHD1   | chr20:35597672-35598173   |
| MRPS10   | chr6:42334521-42336009    |
| ITGB2    | chr21:46344392-46353938   |
| ID2      | chr2:8627644-8629212      |
| CASD1    | chr7:94033188-94035021    |
| LMX1B    | chr9:129278354-129280561  |
| C3AR1    | chr12:8216189-8220784     |

|                |                           |
|----------------|---------------------------|
| NRN1           | chr6:5831501-5832405      |
| ACKR4          | chr3:132312326-132314393  |
| SH3RF3         | chr2:109647820-109649354  |
| MS4A6A         | chr11:59946801-59957275   |
| MVD            | chr16:88748158-88749060   |
| KATNAL1        | chr13:30950222-30950883   |
| CPLX1          | chr4:872653-873154        |
| DHX35          | chr20:37987057-37987558   |
| FOXO1          | chr13:40962540-40963041   |
| BLVRA          | chr7:43698383-43699581    |
| AMICA1         | chr11:118094300-118095694 |
| STAT4          | chr2:192066270-192068066  |
| GIMAP1         | chr7:150411254-150416968  |
| RUNX1          | chr21:36930408-36938875   |
| ZNF469         | chr16:88330652-88334320   |
| VPS8           | chr3:184503053-184505137  |
| AHR            | chr7:17569315-17576451    |
| NTMT1          | chr9:132032947-132034209  |
| ENSG0000018231 | chr8:8190090-8192783      |
| SATB2          | chr2:200674847-200675681  |
| RNF165         | chr18:43829573-43831219   |
| SCN2B          | chr11:118076689-118077999 |
| SLC2A9         | chr4:10034662-10035477    |
| PTPN22         | chr1:114413614-114415114  |
| PPARD          | chr6:35278323-35280214    |
| FBXW11         | chr5:171539751-171540252  |
| AKTIP          | chr16:53551465-53553732   |
| MCF2L2         | chr3:183269676-183274583  |
| ELF1           | chr13:41578570-41579071   |
| SLC4A3         | chr2:220522695-220523196  |
| BICD1          | chr12:31985341-31986234   |
| GIMAP4         | chr7:150208548-150218722  |
| SESN1          | chr6:109223413-109224098  |
| TRIB1          | chr8:126942546-126943847  |
| CDT1           | chr16:88856370-88857757   |
| DOK1           | chr2:74793231-74807042    |
| DGKD           | chr2:234239865-234240366  |
| CTSC           | chr11:88147689-88149288   |
| ZNF281         | chr1:200319922-200324451  |
| DUSP10         | chr1:222167550-222168493  |
| CASD1          | chr7:94053938-94055975    |
| NLRC5          | chr16:57073097-57077189   |
| ARHGAP24       | chr4:86622506-86623007    |
| ADCY7          | chr16:50299483-50302106   |
| STK17B         | chr2:197047568-197048069  |
| ITGAL          | chr16:30482689-30483569   |
| UBE2E1         | chr3:23817506-23819621    |
| PIGC           | chr1:172376929-172378090  |
| NIPBL          | chr5:36724881-36725382    |
| KRTAP16-1      | chr17:39463141-39466238   |
| ADO            | chr10:64144312-64144813   |
| TNFSF14        | chr19:6669610-6670451     |
| MRPL39         | chr21:26934008-26935306   |
| DOCK2          | chr5:169064154-169065159  |
| CASD1          | chr7:94029484-94032561    |
| CAB39          | chr2:231521254-231534881  |



|          |                           |
|----------|---------------------------|
| CUX2     | chr12:111494753-111495604 |
| WDYHV1   | chr8:124489270-124489771  |
| PRICKLE1 | chr12:43150066-43151845   |
| FHOD3    | chr18:33888263-33891279   |
| HINT3    | chr6:126123668-126124456  |
| GIMAP6   | chr7:150371785-150377138  |
| CCL5     | chr17:34216999-34217648   |
| PDGFD    | chr11:104574119-104580050 |
| PALLD    | chr4:169471353-169472056  |
| FYB      | chr5:39268963-39276276    |
| CSNK1A1L | chr13:37747922-37751456   |
| AMIGO2   | chr12:47668883-47673182   |
| SEPT11   | chr4:77702638-77705501    |
| PDE7A    | chr8:66893630-66894131    |
| ZFP69B   | chr1:40861982-40862483    |
| NOL11    | chr17:65430636-65431137   |
| CDH11    | chr16:64372782-64374382   |
| WAPAL    | chr10:88403096-88403740   |
| FAM198B  | chr4:158940902-158942920  |
| COX6C    | chr8:100511161-100511861  |
| GIMAP6   | chr7:150372122-150376428  |
| FCN2     | chr9:137700888-137704564  |
| ITGB1    | chr10:33595101-33595602   |
| PFKFB3   | chr10:6342085-6342973     |
| RNF138   | chr18:29620393-29620894   |
| APPL2    | chr12:106451944-106452657 |
| CUL1     | chr7:148260765-148262620  |
| HOOK1    | chr1:60162694-60163636    |
| SLX1A    | chr16:30194226-30199186   |
| SLC39A10 | chr2:196423786-196425776  |
| COA1     | chr7:43684492-43691849    |
| DDX47    | chr12:12959588-12962558   |
| MPC1     | chr6:166900491-166903707  |
| TAB2     | chr6:149350624-149359402  |
| KIF13B   | chr8:29106953-29108464    |
| SLC12A3  | chr16:56881996-56885191   |
| TFAP2C   | chr20:55449599-55451599   |
| COL5A1   | chr9:137383598-137384099  |
| SLC22A3  | chr6:160883838-160884339  |
| CMTM6    | chr3:32501009-32502458    |
| CAPZB    | chr1:19802614-19804555    |
| HSF2     | chr6:121870009-121870510  |
| MPRIIP   | chr17:16891331-16892380   |
| MAOA     | chrX:43502938-43503712    |
| EMR1     | chr19:6798663-6804470     |
| UCN3     | chr10:5335533-5336613     |
| DNAJC15  | chr13:43565058-43567211   |
| SELPLG   | chr12:109022139-109029560 |
| ITGB1    | chr10:33402491-33403612   |
| PIGC     | chr1:172349811-172350469  |
| SLX4     | chr16:3626203-3629103     |
| RND3     | chr2:151465503-151466460  |
| SLAMF6   | chr1:160546790-160548253  |
| CSNK1A1L | chr13:38114749-38115916   |
| ERI1     | chr8:8654930-8655431      |
| PRPF18   | chr10:13755110-13755611   |

|           |                           |
|-----------|---------------------------|
| TNFRSF10D | chr8:23075553-23078628    |
| ZNF276    | chr16:89830658-89831369   |
| JAK3      | chr19:17961036-17962004   |
| ZNF469    | chr16:88219671-88222259   |
| MN1       | chr22:27620065-27620566   |
| SLFN12L   | chr17:33866635-33868835   |
| FAM187B   | chr19:35702353-35705543   |
| IFITM10   | chr11:1778768-1780411     |
| BOD1L1    | chr4:13889821-13896144    |
| FAM110C   | chr2:176162-176663        |
| KRR1      | chr12:76337548-76339065   |
| CD58      | chr1:117045742-117047782  |
| DCN       | chr12:91718542-91723221   |
| MAPRE2    | chr18:32609792-32610293   |
| PIGC      | chr1:172309984-172314586  |
| SYTL3     | chr6:159070544-159071045  |
| LDLRAD4   | chr18:13463779-13465718   |
| NABP1     | chr2:192348908-192355440  |
| TIGD6     | chr5:149446031-149446841  |
| DCN       | chr12:92428118-92429798   |
| EVI2B     | chr17:29644372-29646300   |
| ASXL1     | chr20:31125183-31128478   |
| GPR88     | chr1:100866352-100866853  |
| SESN1     | chr6:109216649-109217299  |
| XKR8      | chr1:28318780-28319420    |
| RUNX1     | chr21:36874963-36878687   |
| EDN2      | chr1:42268497-42269714    |
| RGS10     | chr10:121275239-121279381 |
| ZCCHC6    | chr9:89019371-89024667    |
| SLFN12L   | chr17:33814464-33815223   |
| SSR3      | chr3:156200711-156202664  |
| COL3A1    | chr2:189585883-189586576  |
| ID2       | chr2:8655857-8656675      |
| FGGY      | chr1:59407900-59408799    |
| FAM105B   | chr5:14593606-14595485    |
| STARD5    | chr15:81587509-81592244   |
| POU2F2    | chr19:42702944-42707084   |
| FYN       | chr6:112349470-112349971  |
| TMPRSS4   | chr11:117873107-117874886 |
| IRF2      | chr4:185434616-185436596  |
| CORO6     | chr17:28032471-28034410   |
| IFNG      | chr12:68375326-68375827   |
| GNA12     | chr7:2913498-2914137      |
| NUBP1     | chr16:10847178-10847880   |
| AKR1E2    | chr10:4011915-4012416     |
| MOB1A     | chr2:74409171-74409672    |
| ZNF785    | chr16:30613307-30613808   |
| GPR128    | chr3:100289211-100289712  |
| NAV2      | chr11:19744960-19745987   |
| FANCL     | chr2:58334724-58335854    |
| ARHGAP18  | chr6:129992864-129995422  |
| LPHN1     | chr19:14466506-14467172   |
| RUNX1     | chr21:36360210-36360711   |
| TMSB4X    | chrX:12972766-12976504    |
| OAS1      | chr12:113344072-113346679 |
| MAX       | chr14:65800530-65802403   |

|          |                          |
|----------|--------------------------|
| PAK7     | chr20:9969186-9970654    |
| PLXDC1   | chr17:37288734-37291858  |
| UBAC2    | chr13:99880717-99881968  |
| SLAMF6   | chr1:160537286-160538825 |
| CUL3     | chr2:225811124-225812366 |
| TGFB3    | chr14:76287831-76290529  |
| CHRNA1   | chr2:175710228-175710875 |
| TRIM14   | chr9:100864943-100865444 |
| CARD8    | chr19:48760896-48761942  |
| SYNE3    | chr14:95989640-95991004  |
| RASA1    | chr5:86414044-86419655   |
| HIF1A    | chr14:61804254-61804755  |
| PIK3R1   | chr5:66517833-66518334   |
| GNGT2    | chr17:47286804-47289162  |
| KDM4B    | chr19:4914846-4916971    |
| HK1      | chr10:70981574-70982908  |
| ARHGAP25 | chr2:68961387-68962580   |
| NUAK2    | chr1:205256535-205257464 |
| IRF2BP2  | chr1:234910864-234911529 |
| TRAF3IP3 | chr1:209928973-209930566 |
| LTB      | chr6:31552912-31556802   |
| CCR5     | chr3:46411775-46412430   |
| AIM1     | chr6:106966700-106968889 |
| CITED2   | chr6:139854406-139856028 |
| GOLGA6C  | chr15:75422849-75423350  |
| ZBTB21   | chr21:43481807-43483394  |
| KLHL6    | chr3:183272764-183273925 |
| MLPH     | chr2:238349311-238350898 |
| ANXA13   | chr8:124850068-124853438 |
| ZFP69B   | chr1:40858079-40858719   |
| RUNX1    | chr21:36398534-36400985  |
| ITGB1    | chr10:33410981-33411769  |
| FPR3     | chr19:52292857-52293358  |
| SDK1     | chr7:3134221-3135409     |
| COL5A2   | chr2:190275839-190278323 |
| TNFAIP3  | chr6:137957865-137958366 |
| MEDAG    | chr13:31313686-31315287  |
| PSMC4    | chr19:40447016-40447783  |
| HINT3    | chr6:126120050-126120849 |
| GZMB     | chr14:25143255-25143944  |
| NEK6     | chr9:126978560-126981534 |
| PTTG1IP  | chr21:46339171-46341609  |
| FRMD6    | chr14:52042207-52043204  |
| BCOR     | chrX:39631273-39631774   |
| LRIG3    | chr12:58922206-58923568  |
| ATP5SL   | chr19:42054876-42056844  |
| ZNF778   | chr16:89381457-89384884  |
| SNRNP200 | chr2:96981003-96982367   |
| CCDC66   | chr3:56815666-56821605   |
| MARCKS   | chr6:114126677-114127178 |
| TPRG1    | chr3:188849388-188851197 |
| AKR1E2   | chr10:4015074-4016110    |
| LCP2     | chr5:169729353-169730452 |
| TSHZ2    | chr20:51109214-51110243  |
| TRPM1    | chr15:31555089-31558521  |
| CALM1    | chr14:91143716-91144513  |

|          |                           |
|----------|---------------------------|
| PREP     | chr6:106348327-106349228  |
| DPT      | chr1:169013128-169013629  |
| FERMT2   | chr14:53574756-53575619   |
| PRSS23   | chr11:86431107-86431608   |
| OLFML2B  | chr1:161921867-161924093  |
| TLE3     | chr15:70550812-70551596   |
| TCF4     | chr18:53166790-53169318   |
| LCP2     | chr5:169703621-169707635  |
| FOXP3    | chr14:90147733-90148234   |
| SULF2    | chr20:46437923-46438424   |
| PFKFB3   | chr10:6389510-6390805     |
| MRGBP    | chr20:61369986-61374299   |
| COL3A1   | chr2:189391069-189393531  |
| PDCD1LG2 | chr9:5493891-5494392      |
| CYTH4    | chr22:37702758-37705707   |
| COG6     | chr13:40683335-40684448   |
| GIMAP8   | chr7:150145231-150151478  |
| SEMA4D   | chr9:92137281-92138880    |
| XYLT1    | chr16:17462352-17464492   |
| REV1     | chr2:100386373-100386874  |
| SLC9A3R1 | chr17:72733141-72735676   |
| DCK      | chr4:71813098-71813599    |
| PLXDC1   | chr17:37236440-37239918   |
| GLRX     | chr5:95206033-95206534    |
| RUNX1    | chr21:36354854-36356333   |
| ZNF469   | chr16:88331619-88333206   |
| CRLF3    | chr17:29135523-29137058   |
| APOA1    | chr11:116722133-116725465 |
| CHST11   | chr12:104856743-104857413 |
| MYOM2    | chr8:1969121-1969622      |
| PPAPDC3  | chr9:134112734-134114005  |
| MTMR2    | chr11:95947612-95951258   |
| PTPN6    | chr12:7059736-7063759     |
| GADD45G  | chr9:92769617-92770426    |
| PIGC     | chr1:172236426-172237231  |
| LRMP     | chr12:25204480-25206355   |
| MS4A6A   | chr11:59951244-59951947   |
| STON2    | chr14:81930851-81931352   |
| PLXDC1   | chr17:37248551-37249548   |
| FUT7     | chr9:139928978-139929970  |
| PLXDC1   | chr17:37250516-37253763   |
| FAP      | chr2:163095050-163103625  |
| CCR2     | chr3:46339555-46340209    |
| PLCB2    | chr15:40599274-40601382   |
| NGB      | chr14:77769373-77770197   |
| ZNF281   | chr1:200321003-200323517  |
| EVL      | chr14:100530645-100532492 |
| CPXM2    | chr10:125823632-125825208 |
| IGSF6    | chr16:21656379-21656880   |
| EIF3G    | chr19:10237239-10237969   |
| ADSS     | chr1:244482352-244483977  |
| LYST     | chr1:236161734-236163578  |
| TMEM176A | chr7:150452170-150453930  |
| RHOBTB1  | chr10:63156164-63159239   |
| CDC42EP3 | chr2:37851038-37853990    |
| RUNX1    | chr21:36847647-36849059   |

|          |                           |
|----------|---------------------------|
| EPAS1    | chr2:46264346-46264984    |
| LAT      | chr16:28995388-28997268   |
| ZADH2    | chr18:72781577-72783598   |
| ZYX      | chr7:143070590-143073436  |
| CNTRL    | chr9:123884120-123884621  |
| NUBP1    | chr16:10842292-10842793   |
| THEMIS2  | chr1:28195193-28196487    |
| KANK1    | chr9:447906-448666        |
| MED9     | chr17:17306684-17308048   |
| RASAL3   | chr19:15574775-15575957   |
| TRPM2    | chr21:45772344-45774334   |
| LCP2     | chr5:169702342-169702843  |
| FGGY     | chr1:59483864-59487309    |
| GMNN     | chr6:24741103-24746497    |
| APCDD1   | chr18:10101836-10102337   |
| CRTAM    | chr11:122598129-122598630 |
| RBKS     | chr2:28446118-28448778    |
| MGAT4A   | chr2:99374024-99377468    |
| FLI1     | chr11:128597228-128599203 |
| GRK5     | chr10:121065088-121066468 |
| IFNGR1   | chr6:137557787-137563597  |
| GIMAP4   | chr7:150263965-150267361  |
| SAP30L   | chr5:153600269-153601875  |
| PPAPDC3  | chr9:134127550-134132517  |
| ZNF114   | chr19:48752097-48754091   |
| NONE     | chr5:18745753-18746516    |
| ZNF414   | chr19:8581858-8584003     |
| RGCC     | chr13:42036993-42040214   |
| SEC11C   | chr18:56603899-56604400   |
| GIMAP1   | chr7:150412541-150415176  |
| THSD7B   | chr2:136995738-136997876  |
| GBP6     | chr1:89828213-89830309    |
| FLI1     | chr11:128594963-128596677 |
| VMP1     | chr17:57829297-57836958   |
| EZR      | chr6:159460030-159460531  |
| DSEL     | chr18:66095722-66096223   |
| FOXN3    | chr14:90186457-90187214   |
| TESPA1   | chr12:55329366-55330071   |
| SYNE1    | chr6:152621232-152624712  |
| NUBP1    | chr16:10843422-10844482   |
| RUNX1    | chr21:36416475-36426325   |
| GPR68    | chr14:91839146-91839776   |
| BST2     | chr19:17515957-17518598   |
| IL10     | chr1:206943174-206944645  |
| DSC1     | chr18:28827388-28828595   |
| ZNF366   | chr5:71768208-71768709    |
| FEZF2    | chr3:62587544-62591509    |
| NEDD1    | chr12:96893893-96896976   |
| SASH3    | chrX:128910405-128911949  |
| ZBP1     | chr20:56201855-56205528   |
| SERTAD2  | chr2:65144854-65145355    |
| SUPT3H   | chr6:45404087-45405766    |
| BMP2K    | chr4:79582429-79584566    |
| RUNX3    | chr1:25348473-25350761    |
| CDKN2AIP | chr4:184270084-184270967  |
| MICALCL  | chr11:12197519-12198020   |

|                |                           |
|----------------|---------------------------|
| BMP2K          | chr4:79575584-79581698    |
| NOX4           | chr11:89223655-89225289   |
| ANKH           | chr5:14810152-14811186    |
| STARD3NL       | chr7:38397943-38398838    |
| HLA-DMB        | chr6:32908388-32909938    |
| FYB            | chr5:39273829-39275612    |
| TOX2           | chr20:42569312-42573204   |
| ZNF217         | chr20:52258467-52260792   |
| CISH           | chr3:50627666-50629157    |
| GIMAP7         | chr7:150178290-150182989  |
| SETD7          | chr4:140578301-140580270  |
| XYLT1          | chr16:17542693-17543366   |
| ADC            | chr1:33564360-33566423    |
| MAPKAP1        | chr9:128411965-128414231  |
| SLC4A11        | chr20:3400661-3401398     |
| PIGC           | chr1:172363257-172364981  |
| FNBP1          | chr9:132707073-132708980  |
| AIM2           | chr1:159045924-159047772  |
| ARHGAP18       | chr6:130008264-130008765  |
| GIMAP4         | chr7:150210775-150215789  |
| ENSG0000018231 | chr8:8200372-8206726      |
| JARID2         | chr6:14275982-14278316    |
| ELFN2          | chr22:37879739-37882927   |
| WISP1          | chr8:134085147-134089582  |
| ARHGEF26       | chr3:152938773-152940704  |
| SLC28A3        | chr9:86911454-86911955    |
| HEXDC          | chr17:80356721-80358712   |
| ZNRD1          | chr6:29932142-29934362    |
| PALLD          | chr4:169550399-169560534  |
| NAMPT          | chr7:106357806-106359961  |
| ABCG1          | chr21:43607238-43608758   |
| TAB2           | chr6:149352499-149354659  |
| SLC4A8         | chr12:51787432-51788609   |
| RNASE6         | chr14:21249108-21250307   |
| LY9            | chr1:160737529-160738338  |
| ZNRF3          | chr22:29206942-29207724   |
| GIMAP8         | chr7:150146062-150150942  |
| PIGC           | chr1:172326748-172330768  |
| MPC1           | chr6:166901204-166902596  |
| OXNAD1         | chr3:16353204-16354304    |
| OAS2           | chr12:113414246-113419249 |
| P2RY11         | chr19:10222648-10223572   |
| SMURF2         | chr17:62704380-62705539   |
| CAB39          | chr2:231523476-231525458  |
| PIGV           | chr1:27070030-27071647    |
| IRF1           | chr5:131801662-131803042  |
| ADCY7          | chr16:50314614-50316189   |
| SERPINB1       | chr6:2857239-2859407      |
| MRGBP          | chr20:61370631-61373226   |
| ZBP1           | chr20:56202272-56204589   |
| NUAK2          | chr1:205252951-205255498  |
| GMNN           | chr6:24742423-24744319    |
| ZFP36L1        | chr14:69245506-69249867   |
| FGGY           | chr1:59485073-59486675    |
| SYNE1          | chr6:152622518-152623786  |
| OAS2           | chr12:113415315-113418047 |

|           |                           |
|-----------|---------------------------|
| SLC41A2   | chr12:104871481-104873181 |
| OR4N4     | chr15:22448341-22449034   |
| CASP12    | chr11:104575424-104576662 |
| CARD11    | chr7:3132233-3132734      |
| SLC24A3   | chr20:19537456-19537957   |
| COX7C     | chr5:86417337-86417838    |
| HECW2     | chr2:197127182-197127994  |
| GNB1L     | chr22:19878420-19880541   |
| FYB       | chr5:39176978-39177706    |
| PTGDR     | chr14:52641095-52645097   |
| AKR1B15   | chr7:134301645-134311920  |
| CECR1     | chr22:17699725-17700226   |
| PTP4A2    | chr1:32354799-32355522    |
| GZMK      | chr5:54390536-54394082    |
| MTBP      | chr8:121743906-121744568  |
| COL15A1   | chr9:101819307-101822442  |
| WNT5A     | chr3:55519129-55522574    |
| ETS1      | chr11:128480585-128481620 |
| C14orf159 | chr14:91694341-91697117   |
| FOXO1     | chr13:40351299-40351800   |
| RFTN1     | chr3:16342086-16342587    |
| DAD1      | chr14:22392341-22392842   |
| RPAP3     | chr12:47670022-47671507   |
| WISP1     | chr8:134151205-134152602  |
| TNFSF18   | chr1:172668704-172669205  |
| KCNU1     | chr8:37132080-37135061    |
| C7orf72   | chr7:50307013-50308538    |
| GULP1     | chr2:189466055-189466682  |
| TUBD1     | chr17:57841368-57842237   |
| TOMM20    | chr1:234907247-234909773  |
| GLCC1     | chr7:8216108-8217698      |
| CCR4      | chr3:33089191-33090459    |
| GZMK      | chr5:54331679-54334698    |
| WISP1     | chr8:134164132-134165796  |
| ODF2L     | chr1:86673393-86673894    |
| CNOT6L    | chr4:78506658-78510481    |
| OLIG2     | chr21:34303836-34305592   |
| IFNE      | chr9:21558385-21560043    |
| CASA      | chr16:87928245-87931608   |
| ASCL1     | chr12:103834217-103837671 |
| HOXB1     | chr17:46529104-46532858   |
| MYO1F     | chr19:8634371-8636559     |
| SENP7     | chr3:101236265-101241264  |
| RDM1      | chr17:34222314-34229132   |
| EFCAB8    | chr20:31559015-31561109   |
| TMEM18    | chr2:429126-431260        |
| RAI14     | chr5:34498630-34500034    |
| ZMIZ1     | chr10:81082003-81082910   |
| HLA-E     | chr6:30476909-30477781    |
| DNAH6     | chr2:85008136-85011569    |
| ZNF521    | chr18:22236938-22237595   |
| H3F3C     | chr12:32079971-32083131   |
| SMOC2     | chr6:169434925-169435907  |
| TNIK      | chr3:170968355-170976961  |
| CD2       | chr1:117311168-117312092  |
| PARP8     | chr5:49928808-49932021    |

|                |                           |
|----------------|---------------------------|
| TYR            | chr11:89112637-89115967   |
| CEP85L         | chr6:118877499-118881450  |
| SP100          | chr2:231526038-231526900  |
| FBXL20         | chr17:37492466-37492967   |
| CYTIP          | chr2:158259438-158263971  |
| TUBD1          | chr17:57838144-57840866   |
| IRF6           | chr1:209941066-209943913  |
| TAF15          | chr17:34202088-34208435   |
| FAM84B         | chr8:126936883-126937544  |
| MTPAP          | chr10:30667435-30667936   |
| TRA2A          | chr7:23578423-23580267    |
| C5orf20        | chr5:134769405-134770284  |
| TBX19          | chr1:168503000-168506905  |
| CMIP           | chr16:81501996-81504508   |
| SNX13          | chr7:17624999-17625500    |
| MZT2A          | chr2:132426825-132427790  |
| ZNF705B        | chr8:8202300-8205236      |
| MRPL36         | chr5:1792884-1793557      |
| MYO1D          | chr17:30878085-30878782   |
| GLCC1          | chr7:7983055-7987003      |
| COL5A1         | chr9:137712411-137713104  |
| DYRK2          | chr12:68511732-68512233   |
| PVRL3          | chr3:111029201-111031881  |
| XRCC5          | chr2:217213440-217219774  |
| SNRK           | chr3:43518801-43519302    |
| LRRRC8C        | chr1:90222323-90224442    |
| C2CD5          | chr12:22547298-22553209   |
| RBL1           | chr20:35669885-35673698   |
| TLE3           | chr15:70007043-70007544   |
| CD2            | chr1:117309203-117309704  |
| TBX19          | chr1:168389039-168393313  |
| H3F3C          | chr12:32044158-32044659   |
| MALT1          | chr18:56324336-56326887   |
| SLC7A9         | chr19:33284069-33287465   |
| WNT2           | chr7:116645929-116646430  |
| DAD1           | chr14:22391009-22394377   |
| ENSG0000025453 | chr10:135202578-135203544 |
| NPIP81         | chr16:29039936-29041196   |
| PHOSPHO1       | chr17:47294547-47297199   |
| TRAM1          | chr8:71435414-71437742    |
| SIRPG          | chr20:1654472-1656044     |
| ST8SIA1        | chr12:22315923-22318340   |
| SNUPN          | chr15:75898602-75899324   |
| OLIG3          | chr6:137708128-137713512  |
| VAPA           | chr18:10139931-10140675   |
| EOMES          | chr3:27921905-27924415    |
| NDC80          | chr18:2601773-2607785     |
| IMPA2          | chr18:12047213-12053969   |
| GCC1           | chr7:127052965-127056259  |
| JPH2           | chr20:42569624-42572221   |
| P2RY1          | chr3:152861923-152864061  |
| ZFH3           | chr16:72515753-72516254   |
| PPP4R1L        | chr20:56425809-56426447   |
| PCSK1          | chr5:95561701-95565394    |
| RMI1           | chr9:86944948-86945449    |
| LSR            | chr19:35731111-35731986   |



|           |                           |
|-----------|---------------------------|
| SNX7      | chr1:99335832-99338130    |
| CHD7      | chr8:61841481-61842166    |
| CAND1     | chr12:67875547-67879817   |
| PRKCH     | chr14:62127566-62130225   |
| HMGB1     | chr13:30945731-30946479   |
| FYB       | chr5:39210452-39210953    |
| MTBP      | chr8:121758806-121763531  |
| TRA2A     | chr7:23579501-23580002    |
| FOXO1     | chr13:40350062-40350563   |
| PPP2R4    | chr9:131995958-132000794  |
| DNM3      | chr1:172343222-172343919  |
| ZSCAN5D   | chr19:56833015-56833516   |
| LMO4      | chr1:88225227-88225860    |
| RPS6KA2   | chr6:166823398-166835284  |
| HOXB1     | chr17:46514030-46523305   |
| ATF6      | chr1:161898353-161900847  |
| TMEM66    | chr8:29347574-29348234    |
| PHLDA1    | chr12:76034215-76036420   |
| CTIF      | chr18:46358828-46361999   |
| CTNNB1    | chr20:36451053-36451554   |
| GIMAP8    | chr7:150199020-150202863  |
| PTPRK     | chr6:128270966-128274645  |
| PPP2R2B   | chr5:146129911-146134740  |
| AKAP7     | chr6:131518490-131522758  |
| PCNX      | chr14:71407416-71409986   |
| CARD11    | chr7:3102080-3103604      |
| SOBP      | chr6:108050798-108063960  |
| LAYN      | chr11:111401322-111404002 |
| WAPAL     | chr10:88170377-88173821   |
| POP4      | chr19:30111690-30116269   |
| NRIP1     | chr21:16048245-16048893   |
| SPECC1    | chr17:20202833-20205699   |
| CHN1      | chr2:175704947-175705573  |
| FMNL3     | chr12:50055168-50059785   |
| SLC5A3    | chr21:35691547-35693150   |
| ZNF281    | chr1:200119686-200124971  |
| TSNAX     | chr1:231746297-231751403  |
| COA5      | chr2:99079762-99082494    |
| CXorf36   | chrX:45617985-45618486    |
| KRTAP12-3 | chr21:46076563-46079939   |
| CREG2     | chr2:101977127-101979470  |
| AKAP11    | chr13:42970759-42971260   |
| NTRK1     | chr1:156839851-156841778  |
| MYO1B     | chr2:192351234-192352778  |
| COX7C     | chr5:86375698-86378579    |
| INMT      | chr7:30777094-30779531    |
| NCK2      | chr2:106542610-106547596  |
| MAPKAPK2  | chr1:206929423-206933157  |
| LSR       | chr19:35728949-35732975   |
| CELF2     | chr10:11443178-11445797   |
| SH3YL1    | chr2:175008-178326        |
| DLEU1     | chr13:51467246-51467747   |
| VAPA      | chr18:10366757-10367258   |
| UPP2      | chr2:158750624-158757932  |
| RBMS1     | chr2:161085084-161085585  |
| OTUD1     | chr10:24438713-24442149   |

|          |                           |
|----------|---------------------------|
| TARS     | chr5:33789365-33790031    |
| GIMAP2   | chr7:150362735-150363825  |
| GPD1L    | chr3:32154705-32157147    |
| LRRRC8C  | chr1:90184495-90185784    |
| GULP1    | chr2:189678666-189679167  |
| EIF3CL   | chr16:28320033-28324335   |
| GSG2     | chr17:3666276-3671862     |
| CLIC5    | chr6:45769730-45770231    |
| CD3D     | chr11:118173022-118193003 |
| WASF3    | chr13:27294794-27296848   |
| FAM171A1 | chr10:15246604-15252584   |
| PTPRC    | chr1:198578283-198585914  |
| SIRPG    | chr20:1664196-1668203     |
| TNFSF14  | chr19:6651661-6656359     |
| LPP      | chr3:188634319-188635529  |
| SUCO     | chr1:172606192-172610972  |
| CHCHD5   | chr2:113387908-113390104  |
| ADA      | chr20:43299712-43301515   |
| MYH13    | chr17:10150720-10151221   |
| PFKFB3   | chr10:6570013-6573620     |
| LPA      | chr6:160880686-160884963  |
| CTNBL1   | chr20:36449171-36453215   |
| SMYD3    | chr1:245913747-245915905  |
| SLX4     | chr16:3675104-3677959     |
| CDHR3    | chr7:105488528-105493041  |
| EVI5     | chr1:93001485-93004833    |
| ABI1     | chr10:27009449-27011763   |
| ANKRD32  | chr5:93908829-93916282    |
| JUN      | chr1:59395158-59395926    |
| UXS1     | chr2:106710607-106711108  |
| PAPOLG   | chr2:61045794-61047793    |
| SCAI     | chr9:127725966-127729939  |
| VAPA     | chr18:10304242-10305701   |
| OSTF1    | chr9:77760489-77769313    |
| DNAJC5B  | chr8:66864600-66866727    |
| HMCN1    | chr1:186157655-186158156  |
| CAND1    | chr12:67753128-67753629   |
| ATP6V1G3 | chr1:198159360-198160052  |
| CNOT6L   | chr4:78746735-78750312    |
| SLC5A3   | chr21:35704706-35712949   |
| LYAR     | chr4:4267906-4273265      |
| CYYR1    | chr21:27566992-27568491   |
| COX7C    | chr5:86377578-86378079    |
| SF3B1    | chr2:198186440-198190386  |
| SIRPG    | chr20:1711451-1713510     |
| SP140    | chr2:231181635-231185037  |
| GRM4     | chr6:34149232-34151881    |
| AXIN2    | chr17:63173667-63179923   |
| CACNA2D3 | chr3:54908909-54910043    |
| SPPL2A   | chr15:51116685-51119254   |
| SNX7     | chr1:98854366-98854867    |
| ZNF438   | chr10:31389293-31391440   |
| UBE2E3   | chr2:181988127-181993464  |
| FBXO11   | chr2:48319903-48320404    |
| FBXO11   | chr2:48315122-48318201    |
| SPATA21  | chr1:16746405-16748515    |

|          |                           |
|----------|---------------------------|
| UBE2V2   | chr8:49319315-49323469    |
| ZFAND5   | chr9:75056470-75058230    |
| KCNH5    | chr14:62604586-62607472   |
| GGTLC2   | chr22:23094680-23103469   |
| STK39    | chr2:168887693-168888194  |
| GUCY1A3  | chr4:156514644-156515145  |
| HECA     | chr6:139446301-139448105  |
| GRIA2    | chr4:158963136-158963870  |
| UST      | chr6:149357201-149357702  |
| SLC2A13  | chr12:40075968-40078098   |
| CBR4     | chr4:169552261-169554306  |
| CHST3    | chr10:73843915-73844416   |
| ITIH5    | chr10:7526666-7527451     |
| EIF3H    | chr8:117435915-117436416  |
| TYR      | chr11:89190002-89193520   |
| SRSF7    | chr2:38908095-38912823    |
| SLC14A2  | chr18:43265152-43269676   |
| TMEM232  | chr5:109190887-109196636  |
| GLCC1    | chr7:8163860-8192721      |
| PDE4B    | chr1:66961461-66961962    |
| HECW2    | chr2:197063135-197067844  |
| GIPC2    | chr1:78805372-78805873    |
| PDGFC    | chr4:157219875-157220376  |
| JAKMIP1  | chr4:6178808-6186584      |
| OR4N4    | chr15:22481740-22485082   |
| PTPRK    | chr6:128573821-128574322  |
| MED21    | chr12:27332343-27332844   |
| PPP1R12B | chr1:202597054-202598713  |
| TIGIT    | chr3:114003674-114005983  |
| BPGM     | chr7:134353049-134355968  |
| VAPA     | chr18:10251872-10254935   |
| DEC1     | chr9:118376666-118379982  |
| SAMD9    | chr7:92534127-92534628    |
| MARCH1   | chr4:164583040-164589490  |
| ZNF131   | chr5:42985030-42985531    |
| MYB      | chr6:135448736-135451339  |
| EFTUD1   | chr15:82374429-82374930   |
| KLRB1    | chr12:9515492-9519753     |
| ZFP64    | chr20:51022194-51024690   |
| PFKFB3   | chr10:6583655-6587860     |
| SP100    | chr2:231466290-231469334  |
| PTPRK    | chr6:128253820-128257185  |
| SF3B1    | chr2:198190918-198194067  |
| FANK1    | chr10:127843151-127843785 |
| ANTXR1   | chr2:69498992-69499635    |
| TNIP3    | chr4:122109736-122114413  |
| CHRM3    | chr1:239880776-239885688  |
| SLC20A1  | chr2:113463007-113468033  |
| PTPN22   | chr1:114402798-114403299  |
| F2R      | chr5:76026117-76031015    |
| TSPAN5   | chr4:99367337-99367838    |
| CCR3     | chr3:46317689-46345641    |
| PARP14   | chr3:122477773-122478274  |
| ZBED2    | chr3:111259920-111270842  |
| FABP12   | chr8:82411709-82412381    |
| ZFAT     | chr8:135053713-135057365  |

|          |                           |
|----------|---------------------------|
| BTG1     | chr12:92449067-92451171   |
| TRIM33   | chr1:114882886-114886275  |
| TNR      | chr1:175177259-175181143  |
| USP25    | chr21:16885661-16887834   |
| GTSF1L   | chr20:42379128-42381600   |
| CEP128   | chr14:81395529-81399050   |
| TYR      | chr11:89191216-89192511   |
| SLC30A10 | chr1:219596146-219596647  |
| CAND1    | chr12:67908162-67911718   |
| PFKFB3   | chr10:6514443-6517764     |
| ACAD9    | chr3:128641201-128643219  |
| CBX7     | chr22:39510586-39515064   |
| TTLL5    | chr14:76341580-76347447   |
| RCSL1    | chr1:167586598-167587099  |
| KCNA3    | chr1:111178182-111178836  |
| TTLL5    | chr14:76298257-76298885   |
| NPY      | chr7:24494764-24497580    |
| AKAP11   | chr13:42927196-42931577   |
| VAV1     | chr19:6801325-6803162     |
| TMSB10   | chr2:85173145-85173915    |
| APBB1IP  | chr10:26768943-26769444   |
| UST      | chr6:149366464-149368223  |
| COTL1    | chr16:84551289-84553814   |
| COL8A1   | chr3:99748318-99754169    |
| RUNX1    | chr21:36135507-36136225   |
| ABCC4    | chr13:95920541-95921042   |
| POU2F1   | chr1:167478905-167488722  |
| ACKR3    | chr2:237450101-237450902  |
| SFMBT2   | chr10:7086540-7090299     |
| YEATS4   | chr12:69798515-69799150   |
| OPCML    | chr11:132226816-132229261 |
| EOMES    | chr3:27753616-27764399    |
| FANK1    | chr10:127933029-127933710 |
| GAP43    | chr3:114882015-114885290  |
| ITIH5    | chr10:7548547-7551136     |
| CRYL1    | chr13:21002770-21003271   |
| ICOS     | chr2:204856555-204860689  |
| BARHL1   | chr9:135523378-135523879  |
| TXNL1    | chr18:53456541-53458263   |
| GSG2     | chr17:3673225-3674837     |
| NUAK1    | chr12:106377918-106378593 |
| RBL1     | chr20:35595144-35604869   |
| SHC3     | chr9:91651396-91651897    |
| CD84     | chr1:160545538-160546039  |
| UBE2V2   | chr8:49318285-49323865    |
| ATP9B    | chr18:76915989-76918459   |
| AKR1B15  | chr7:134309965-134310466  |
| DYNC2H1  | chr11:103668213-103668714 |
| FAM65B   | chr6:24947481-24958018    |
| IL12A    | chr3:159887144-159887645  |
| CPOX     | chr3:98266577-98288499    |
| KCTD16   | chr5:143568949-143569450  |
| ETS2     | chr21:40138686-40139187   |
| EGFR     | chr7:55374643-55378677    |
| SH3TC2   | chr5:148226158-148231384  |
| ATP2B2   | chr3:10436270-10439245    |

|          |                          |
|----------|--------------------------|
| LRR8C    | chr1:90203975-90207236   |
| RFX8     | chr2:102012128-102012863 |
| FMN1     | chr15:33120156-33120657  |
| EHF      | chr11:34634115-34637467  |
| ITIH5    | chr10:7512255-7516059    |
| CLIC5    | chr6:45587952-45588453   |
| PHF8     | chrX:53740211-53745674   |
| MTBP     | chr8:121791451-121792102 |
| SFMBT2   | chr10:7070605-7071106    |
| COL8A1   | chr3:99114706-99116199   |
| ZFP64    | chr20:51018512-51029692  |
| GRAP2    | chr22:40294686-40318612  |
| SRGAP3   | chr3:9321402-9323525     |
| RETNLB   | chr3:108320966-108323738 |
| GALM     | chr2:38935176-38938378   |
| SERPINI1 | chr3:167657646-167658275 |
| SHPRH    | chr6:146185909-146189673 |
| USP11    | chrX:47220959-47222417   |
| APBB1P   | chr10:26734030-26739969  |
| HOXB1    | chr17:46587568-46589437  |
| METTL11B | chr1:170258877-170262648 |
| PLGLB2   | chr2:87795239-87795740   |
| ADAMTS14 | chr10:72422305-72423276  |
| METTL11B | chr1:170414668-170415169 |
| HIVEP3   | chr1:42148848-42149349   |
| SUPV3L1  | chr10:70959829-70966597  |
| ITK      | chr5:156604703-156627524 |
| ZNF80    | chr3:113948946-113955155 |
| QPRT     | chr16:29748907-29751133  |
| FAM65B   | chr6:25036895-25037563   |
| IFNE     | chr9:21575499-21580783   |
| PPT1     | chr1:40524764-40526064   |
| ZNF684   | chr1:41093278-41096763   |
| ADAT2    | chr6:143497136-143497637 |
| LRR8C    | chr11:76411936-76412437  |
| MAP10    | chr1:233056692-233062258 |
| FGL2     | chr7:76435671-76436172   |
| VAPA     | chr18:10376684-10380132  |
| POSTN    | chr13:37956069-37957038  |
| HLA-F    | chr6:29676934-29677435   |
| SLC24A3  | chr20:19476493-19478702  |
| SHQ1     | chr3:72804907-72807455   |
| YWHAQ    | chr2:9794554-9797685     |
| UBE2U    | chr1:64758190-64758691   |
| CD48     | chr1:160677037-160677538 |
| KHDRBS3  | chr8:136220083-136226600 |
| CEP78    | chr9:80815241-80817253   |
| GNAL     | chr18:11516814-11517315  |
| SLAMF7   | chr1:160708062-160721378 |
| OTUD1    | chr10:24438765-24442963  |
| PTP4A2   | chr1:32291288-32294170   |
| GALNT10  | chr5:153577881-153578382 |
| ARID5B   | chr10:63988622-64005863  |
| ARSB     | chr5:78077133-78080357   |
| PSME4    | chr2:54220494-54224536   |
| ACSL6    | chr5:131309769-131312044 |

|                |                           |
|----------------|---------------------------|
| PPP4R1L        | chr20:56501586-56504345   |
| CDC5L          | chr6:44615198-44615699    |
| EIF4E3         | chr3:71544868-71545974    |
| RFX3           | chr9:3397252-3399095      |
| GJA1           | chr6:122205356-122205857  |
| ZHX1           | chr8:124107482-124109490  |
| PRKAG2         | chr7:151464792-151467889  |
| VAPA           | chr18:10365011-10365512   |
| PRKAR2B        | chr7:106765890-106768255  |
| ENSG0000017351 | chr15:77558482-77561022   |
| GADD45G        | chr9:92147733-92155281    |
| FAM114A2       | chr5:153051399-153051900  |
| CDKAL1         | chr6:21263567-21266919    |
| MUCL1          | chr12:55370489-55380382   |
| TMEM66         | chr8:29636679-29637830    |
| PRKCB          | chr16:23958244-23964833   |
| BCL2L10        | chr15:52336797-52340381   |
| DPP7           | chr9:139988833-139992066  |
| CMTM8          | chr3:32412144-32414527    |
| DTNB           | chr2:25599916-25600417    |
| SPECC1         | chr17:20203786-20204428   |
| H2AFY2         | chr10:71851519-71853726   |
| TNFAIP3        | chr6:138087607-138090686  |
| BLID           | chr11:121351678-121355767 |
| TMEM18         | chr2:317228-318893        |
| ASB13          | chr10:5605358-5608385     |
| GADD45G        | chr9:92133045-92147246    |
| TMEM163        | chr2:134990169-134991830  |
| BNIP2          | chr15:60095179-60096821   |
| CCR3           | chr3:46342823-46343532    |
| ARL5B          | chr10:19025467-19029071   |
| EVI2A          | chr17:29655712-29656655   |
| DOCK10         | chr2:225806551-225825252  |
| MYO5A          | chr15:52772711-52777375   |
| LGMN           | chr14:93044282-93044783   |
| SUCNR1         | chr3:151912737-151913238  |
| PRDM8          | chr4:81058515-81062386    |
| SH3KBP1        | chrX:19822153-19824380    |
| NREP           | chr5:111265718-111266543  |
| CMAS           | chr12:22382892-22383393   |
| NLGN3          | chrX:70415403-70418708    |
| P2RY10         | chrX:78350567-78354479    |
| TBL1XR1        | chr3:177358634-177363051  |
| MRC2           | chr17:60867817-60868318   |
| CSNK1A1        | chr5:148777177-148777678  |
| COL6A3         | chr2:238033328-238033829  |
| ICOS           | chr2:204815992-204816621  |
| CLIC5          | chr6:45622844-45625012    |
| CASA           | chr16:87927105-87932951   |
| GPATCH1        | chr19:33650672-33652484   |
| TSPAN5         | chr4:99366494-99370927    |
| GULP1          | chr2:189461995-189468712  |
| COL4A4         | chr2:227758460-227759283  |
| PRUNE2         | chr9:79191205-79191875    |
| TYR            | chr11:89112191-89117537   |
| FILIP1L        | chr3:99375000-99379333    |

|           |                           |
|-----------|---------------------------|
| GOLGA7    | chr8:41371265-41375391    |
| CD53      | chr1:111330223-111330724  |
| NREP      | chr5:111289273-111289774  |
| KIF26B    | chr1:246131984-246132485  |
| M1AP      | chr2:74803140-74804946    |
| ST7       | chr7:116923740-116924241  |
| DDX6      | chr11:118568930-118571992 |
| DLEU1     | chr13:50893145-50895275   |
| RND3      | chr2:150505735-150506236  |
| CCDC41    | chr12:94675719-94677825   |
| ABHD2     | chr15:89610675-89611864   |
| PLXDC2    | chr10:20911722-20914814   |
| CAND1     | chr12:67751187-67752167   |
| COL5A1    | chr9:137685817-137716331  |
| FBXW7     | chr4:152999756-153002968  |
| DNAJC5B   | chr8:66862735-66863952    |
| TBC1D3B   | chr17:34430188-34436258   |
| CDC42SE2  | chr5:130881032-130886680  |
| SAMD3     | chr6:130348296-130351378  |
| TNFRSF10A | chr8:23087720-23089226    |
| IL10RA    | chr11:117829371-117831767 |
| CDKAL1    | chr6:21438810-21439311    |
| MGAT5B    | chr17:74992210-74996162   |
| M1AP      | chr2:74801675-74802176    |
| SNX13     | chr7:17617640-17625978    |
| CDC42SE2  | chr5:130849151-130851588  |
| ZNF341    | chr20:32391305-32392276   |
| GALNT4    | chr12:89861374-89864304   |
| NKD2      | chr5:983609-984422        |
| IMPA2     | chr18:12047787-12050812   |
| NEGR1     | chr1:72121826-72127879    |
| H3F3C     | chr12:31956427-31958087   |
| HECA      | chr6:139446019-139451165  |
| PPM1G     | chr2:27612606-27616132    |
| BCL2A1    | chr15:80258383-80264797   |
| TM4SF18   | chr3:148994315-148996171  |
| POSTN     | chr13:38019816-38022674   |
| LAMA3     | chr18:21580563-21581064   |
| NEDD4L    | chr18:56281077-56284248   |
| DOK6      | chr18:67611331-67618218   |
| RGS3      | chr9:116430719-116431220  |
| WNT5A     | chr3:55032746-55034644    |
| PUS7      | chr7:105086518-105091217  |
| AXIN2     | chr17:63169850-63170351   |
| CCR1      | chr3:46254729-46255230    |
| DOCK10    | chr2:225813432-225813933  |
| C10orf90  | chr10:128084061-128087414 |
| AAK1      | chr2:69915909-69923538    |
| TMSB10    | chr2:85165146-85168639    |
| FBXO31    | chr16:86618505-86620602   |
| TNFSF4    | chr1:173173327-173177058  |
| S100PBP   | chr1:33262703-33267548    |
| CNGB1     | chr16:57868201-57870374   |
| ZC3H8     | chr2:112938742-112942226  |
| ATF6      | chr1:161898334-161905305  |
| GUCY1A3   | chr4:156548997-156552451  |

|          |                           |
|----------|---------------------------|
| SLC41A2  | chr12:104878603-104879104 |
| LAMB4    | chr7:107718443-107719072  |
| ID3      | chr1:23938055-23942350    |
| PAQR8    | chr6:52253048-52260113    |
| ARL4C    | chr2:235072022-235076018  |
| PARP1    | chr1:226612141-226614039  |
| CD109    | chr6:75287276-75289234    |
| GK       | chrX:30592656-30597088    |
| CWF19L2  | chr11:106913421-106914104 |
| DCHS2    | chr4:154719976-154720477  |
| PLEK     | chr2:68649959-68657731    |
| PHAX     | chr5:126083122-126085059  |
| ICA1     | chr7:8053970-8055690      |
| LINGO2   | chr9:27785153-27785654    |
| DPP7     | chr9:139990474-139990975  |
| POSTN    | chr13:37743153-37743812   |
| KLHL15   | chrX:23971831-23972332    |
| ARID5B   | chr10:63990203-63990704   |
| VAPA     | chr18:10070264-10070765   |
| OLFM3    | chr1:101748523-101750811  |
| INO80    | chr15:41277482-41278211   |
| PLEKHG4B | chr5:168908-169609        |
| ADAMTS14 | chr10:72410868-72417625   |
| HHIPL2   | chr1:222097493-222097994  |
| BPI      | chr20:36903406-36905253   |
| SLC5A3   | chr21:35653238-35653739   |
| TNFSF9   | chr19:6575766-6578871     |
| DNAJC5B  | chr8:66855761-66856262    |
| EML4     | chr2:42522259-42527406    |
| EPB41L4A | chr5:111332359-111335983  |
| MGAT4A   | chr2:99269346-99282885    |
| FAM65B   | chr6:25024865-25029011    |
| EPS8     | chr12:15696863-15701432   |
| GJA1     | chr6:122202970-122203471  |
| CA5B     | chrX:15799263-15801502    |
| CLMP     | chr11:122956461-122959996 |
| PREP     | chr6:106089881-106100630  |
| IQCA1    | chr2:237443142-237447768  |
| MREG     | chr2:216581377-216584378  |
| RBX1     | chr22:41371596-41372097   |
| PRL      | chr6:21634204-21635497    |
| DOCK2    | chr5:169122694-169123195  |
| UXT      | chrX:47566094-47567689    |
| DAB2     | chr5:39755442-39756142    |
| COL5A1   | chr9:137708067-137709938  |
| ARID5B   | chr10:63996256-63996757   |
| PRPF18   | chr10:14049803-14050834   |
| AKIRIN2  | chr6:88355078-88355579    |
| TMEM154  | chr4:153473287-153478510  |
| GRB7     | chr17:37967736-37972160   |
| METTL9   | chr16:21550269-21553486   |
| MYB      | chr6:135679767-135680268  |
| UXT      | chrX:47566239-47568023    |
| ZNF365   | chr10:64376485-64381832   |
| PTHLH    | chr12:27974000-27976085   |
| COPS8    | chr2:238209083-238210134  |



|          |                           |
|----------|---------------------------|
| ZFP36L2  | chr2:43114011-43116370    |
| OTUD4    | chr4:146219434-146223218  |
| STXBP6   | chr14:25161685-25165346   |
| P2RY8    | chrX:1619728-1620229      |
| ST3GAL3  | chr1:44261180-44262993    |
| ARV1     | chr1:231107270-231110762  |
| RPGRIP1L | chr16:53634382-53635191   |
| COL24A1  | chr1:86618400-86623077    |
| PARP8    | chr5:50147638-50153531    |
| ATP6V1A  | chr3:113547530-113550794  |
| TNIP3    | chr4:122073131-122078849  |
| LRIG2    | chr1:113588707-113590588  |
| SLC5A3   | chr21:35705580-35706365   |
| GRK7     | chr3:141530473-141530974  |
| CYSLTR2  | chr13:49379051-49379997   |
| SERPINB6 | chr6:2936620-2938475      |
| GRIA2    | chr4:158971566-158974785  |
| MN1      | chr22:27529921-27531264   |
| CALML3   | chr10:5637496-5638558     |
| FOXQ1    | chr6:1285806-1287824      |
| GRIK1    | chr21:30820912-30823317   |
| SETD2    | chr3:47078901-47080714    |
| H3F3C    | chr12:31838801-31841066   |
| ARID5A   | chr2:97258889-97263356    |
| IARS     | chr9:94942389-94944339    |
| RARRES3  | chr11:63318524-63322482   |
| CRYBB1   | chr22:27005525-27007284   |
| ICOS     | chr2:204797118-204809378  |
| PALD1    | chr10:72335146-72340308   |
| ATP6V1G3 | chr1:198154501-198163540  |
| SEPHS2   | chr16:30467892-30471399   |
| RHOH     | chr4:40266392-40268748    |
| TMCC2    | chr1:205267211-205268418  |
| PCSK1    | chr5:95872397-95874785    |
| CX3CR1   | chr3:39335157-39337960    |
| KATNAL1  | chr13:30508124-30513593   |
| NAGA     | chr22:42426418-42428279   |
| ZNF354C  | chr5:178729585-178732387  |
| GPIHBP1  | chr8:144272207-144273414  |
| GLIPR1L2 | chr12:75864855-75867124   |
| BTG1     | chr12:92601209-92604681   |
| AKTIP    | chr16:53482583-53495406   |
| TRAF3    | chr14:103270957-103275162 |
| ZNF365   | chr10:64396684-64398727   |
| PDZRN4   | chr12:42490672-42492788   |
| DNM3     | chr1:172323391-172323892  |
| SLC9A9   | chr3:142888556-142891052  |
| CD48     | chr1:160678260-160678920  |
| GSG2     | chr17:3613256-3616851     |
| UST      | chr6:149530548-149537615  |
| GGACT    | chr13:100863151-100863652 |
| ZBED2    | chr3:111333706-111337219  |
| SPIN1    | chr9:90937264-90938963    |
| NUP214   | chr9:134053288-134057519  |
| ITGB2    | chr21:46298633-46302403   |
| RMI1     | chr9:86907369-86909135    |

|                |                           |
|----------------|---------------------------|
| TECTB          | chr10:114128357-114130589 |
| SYT4           | chr18:41515317-41516272   |
| WAPAL          | chr10:88170037-88174476   |
| DEPDC5         | chr22:32312579-32314626   |
| FMO3           | chr1:171086345-171086846  |
| POSTN          | chr13:37708202-37709383   |
| MGAT5          | chr2:135425915-135429812  |
| ARSF           | chrX:3181319-3181820      |
| CD109          | chr6:75381392-75382084    |
| CREB3L1        | chr11:46268446-46272028   |
| SELL           | chr1:169648500-169681623  |
| ZFAND3         | chr6:38355339-38355840    |
| CTIF           | chr18:46392966-46396767   |
| ARAP2          | chr4:36255828-36259347    |
| PRTFDC1        | chr10:25182505-25184729   |
| XRCC6BP1       | chr12:58894581-58899699   |
| PPP1R1C        | chr2:183363987-183364846  |
| POU4F2         | chr4:148044549-148045222  |
| BSX            | chr11:122726449-122728538 |
| AK5            | chr1:77737107-77738299    |
| FANK1          | chr10:127837312-127837813 |
| FAM174A        | chr5:100187790-100191537  |
| FAM114A1       | chr4:39028702-39035663    |
| ENSG0000025686 | chr12:122727077-122732063 |
| LPP            | chr3:187710857-187713427  |
| SETD4          | chr21:36883650-36884949   |
| FAM69A         | chr1:93437189-93448413    |
| ELMO1          | chr7:36814443-36821530    |
| KATNAL1        | chr13:30528430-30528931   |
| LIX1L          | chr1:145500860-145503901  |
| MKL2           | chr16:14602593-14606595   |
| PREP           | chr6:105956780-105959583  |
| NRG1           | chr8:32918914-32919415    |
| EIF4E3         | chr3:71550666-71556241    |
| LEMD3          | chr12:65549507-65551461   |
| ASXL2          | chr2:26014955-26022324    |
| HAS2           | chr8:122100923-122101424  |
| ZBTB20         | chr3:114023033-114030125  |
| RD3            | chr1:211525154-211528889  |
| CDK14          | chr7:90793155-90795995    |
| KIAA1644       | chr22:44597790-44598291   |
| SYTL2          | chr11:85411610-85412111   |
| ALDH1L2        | chr12:105430450-105433891 |
| MAPK10         | chr4:86623821-86624322    |
| LPIN1          | chr2:12267013-12268605    |
| PKD2L1         | chr10:102065611-102068279 |
| UST            | chr6:149553685-149555984  |
| VWA8           | chr13:42079881-42080382   |
| TMEM66         | chr8:29223880-29225318    |
| POU2F1         | chr1:167414539-167418688  |
| RHOH           | chr4:40237273-40250444    |
| ATXN3L         | chrX:13068166-13072858    |
| SETD4          | chr21:36442384-36447145   |
| VSX1           | chr20:25070438-25073193   |
| CMYA5          | chr5:79227603-79236158    |
| ARID5B         | chr10:63994252-63994753   |

|          |                           |
|----------|---------------------------|
| ZCCHC7   | chr9:37144575-37147653    |
| ZFP64    | chr20:50647583-50649524   |
| ETV6     | chr12:12111144-12111645   |
| NFKBIZ   | chr3:101655124-101655973  |
| N4BP1    | chr16:48491610-48493329   |
| TOP2B    | chr3:25502386-25502887    |
| ACPL2    | chr3:141025034-141027838  |
| RGS21    | chr1:192499414-192499915  |
| UST      | chr6:149414489-149417552  |
| PCNX     | chr14:71338304-71339812   |
| INTS10   | chr8:19573194-19579059    |
| FXYD4    | chr10:43794008-43796667   |
| PDP1     | chr8:95176472-95178961    |
| SNX13    | chr7:17571530-17573830    |
| OSTF1    | chr9:78416032-78419995    |
| OPCML    | chr11:131934351-131934852 |
| COL24A1  | chr1:86620223-86621494    |
| UBASH3B  | chr11:122565176-122572876 |
| ZNF438   | chr10:31026092-31026593   |
| XRCC6BP1 | chr12:58895803-58896304   |
| RASGRF2  | chr5:80301838-80305345    |
| ETV3     | chr1:157075195-157075696  |
| TARS     | chr5:33690367-33692035    |
| FBXO31   | chr16:86618302-86620805   |
| PFKFB3   | chr10:6532283-6538050     |
| MME      | chr3:154782910-154783411  |
| CLIC5    | chr6:45416613-45417114    |
| SLC20A1  | chr2:113455666-113460554  |
| FUT8     | chr14:66392553-66396973   |
| GIMAP7   | chr7:150251621-150255945  |
| CDC14A   | chr1:100918875-100919376  |
| PRSS58   | chr7:142045248-142045749  |
| CASP12   | chr11:104746604-104749060 |
| AHR      | chr7:17694083-17695883    |
| ZNF774   | chr15:90918636-90922483   |
| SCN3A    | chr2:165837611-165838112  |
| ADAMDEC1 | chr8:24240544-24245901    |
| GAPVD1   | chr9:128283378-128285411  |
| SMYD3    | chr1:245949696-245951042  |
| TNFSF14  | chr19:6640219-6642891     |
| NIN      | chr14:51278564-51282023   |
| AMPH     | chr7:38388410-38405860    |
| SERTAD2  | chr2:65033985-65035232    |
| PARP15   | chr3:122328141-122329327  |
| SAMD3    | chr6:130504279-130506291  |
| NEK7     | chr1:198503297-198504999  |
| SYT4     | chr18:41468254-41469058   |
| STARD4   | chr5:110558796-110574556  |
| AMFR     | chr16:56293689-56298363   |
| METTL8   | chr2:172066855-172068571  |
| KLF6     | chr10:4022066-4022567     |
| TXNL1    | chr18:53455671-53458744   |
| GRM4     | chr6:33872639-33873140    |
| RASGRP1  | chr15:39188201-39188843   |
| CCDC141  | chr2:179910584-179915140  |
| GRIA2    | chr4:158971443-158974766  |

|           |                           |
|-----------|---------------------------|
| ARID5B    | chr10:63512510-63513011   |
| METTL8    | chr2:172179098-172185108  |
| TNFRSF9   | chr1:7995498-8003823      |
| BTG1      | chr12:91742056-91743501   |
| A1CF      | chr10:52566804-52569360   |
| CTBP1     | chr4:1260693-1262289      |
| CYYR1     | chr21:27566260-27569201   |
| CACNG6    | chr19:54538025-54540016   |
| CD2       | chr1:117336939-117337440  |
| TIAM1     | chr21:32815036-32820831   |
| ALOX5AP   | chr13:31347445-31349654   |
| DAD1      | chr14:22538330-22540384   |
| ZNF831    | chr20:57694968-57700405   |
| CLIC5     | chr6:45461561-45465275    |
| TTLL5     | chr14:76307758-76310189   |
| AMOTL1    | chr11:94642044-94645128   |
| ANK2      | chr4:114658843-114659344  |
| MRPS22    | chr3:139026423-139028847  |
| SEC23IP   | chr10:122182587-122183225 |
| ELMO1     | chr7:37353944-37356472    |
| GRB7      | chr17:37972339-37978970   |
| RPAP3     | chr12:47582484-47588729   |
| KRTAP10-8 | chr21:46037795-46040003   |
| PREP      | chr6:105998104-106001982  |
| TRDMT1    | chr10:17251622-17252594   |
| PRF1      | chr10:72251902-72256606   |
| CBR4      | chr4:169672033-169674950  |
| CD109     | chr6:75286630-75289960    |
| KERA      | chr12:91434374-91435032   |
| ADAMTS14  | chr10:72421078-72425900   |
| JAKMIP1   | chr4:6199042-6203092      |
| CCR1      | chr3:46253765-46256843    |
| IL1RL1    | chr2:102953422-102953923  |
| TSHZ3     | chr19:31867898-31870429   |
| S100PBP   | chr1:33265477-33265978    |
| TTC28     | chr22:28534500-28544558   |
| NCK1      | chr3:136602483-136606781  |
| ZFAND3    | chr6:38229506-38230257    |
| CTBP1     | chr4:1194193-1199050      |
| SIGLEC8   | chr19:51943246-51945891   |
| SF3B5     | chr6:144375663-144377688  |
| ARHGEF3   | chr3:56758047-56761482    |
| CLIC5     | chr6:45583905-45588871    |
| NTNG1     | chr1:108367665-108374118  |
| CEP85L    | chr6:119116980-119118230  |
| ID3       | chr1:23926854-23930250    |
| SFMBT2    | chr10:6965816-6972590     |
| MTBP      | chr8:121785049-121794691  |
| DDX10     | chr11:108740812-108742226 |
| ZFP64     | chr20:51108653-51111657   |
| DDX6      | chr11:118569609-118570110 |
| PAM       | chr5:102157611-102160715  |
| GPR126    | chr6:143220989-143229722  |
| TMEM26    | chr10:63156529-63158398   |
| ELMO1     | chr7:36774790-36778078    |
| OR4E2     | chr14:22855905-22858918   |

|          |                           |
|----------|---------------------------|
| KIF26B   | chr1:246018902-246025413  |
| MMP13    | chr11:102752050-102754710 |
| ANXA4    | chr2:69922085-69922832    |
| TGFB3    | chr14:76181747-76182565   |
| P2RY8    | chrX:1671403-1675044      |
| ZIC4     | chr3:146683396-146692577  |
| NME7     | chr1:169332609-169333110  |
| HGF      | chr7:81038840-81039717    |
| GULP1    | chr2:189757170-189759529  |
| RGS21    | chr1:192496634-192500988  |
| SH3KBP1  | chrX:19760952-19772098    |
| HMCN1    | chr1:185785717-185787328  |
| KATNAL1  | chr13:30692708-30693710   |
| ZNF148   | chr3:125028919-125030773  |
| VAPA     | chr18:10213099-10214465   |
| SNX13    | chr7:17499904-17509150    |
| PITPNC1  | chr17:65444653-65453272   |
| NAB1     | chr2:191703131-191703784  |
| CCNE1    | chr19:30321172-30324226   |
| COPS8    | chr2:238192615-238193116  |
| RUFY1    | chr5:178913521-178914022  |
| MREG     | chr2:216523491-216525240  |
| GULP1    | chr2:189766650-189768519  |
| COPS8    | chr2:238173454-238174161  |
| POSTN    | chr13:37767525-37768026   |
| LGMN     | chr14:93029280-93030725   |
| COL8A1   | chr3:99751882-99752759    |
| PCSK1    | chr5:95481548-95482339    |
| COX6A1P2 | chr6:37104628-37105945    |
| BTG1     | chr12:92602854-92603959   |
| TYW5     | chr2:200903686-200904187  |
| TNPO3    | chr7:128580333-128581232  |
| MYO1D    | chr17:30895460-30895961   |
| ZFP64    | chr20:50476394-50477816   |
| HOXB1    | chr17:46561500-46562205   |
| TDO2     | chr4:156811047-156811959  |
| SETD4    | chr21:36724851-36726049   |
| TTC30B   | chr2:178294170-178294671  |
| NREP     | chr5:111283166-111285644  |
| FAM65B   | chr6:24951382-24951883    |
| SIRPG    | chr20:1650364-1650865     |
| RASGRP1  | chr15:39006601-39007234   |
| NEK7     | chr1:198466677-198467178  |
| KIF26B   | chr1:246036909-246038402  |
| FOXQ1    | chr6:1145629-1146306      |
| RBKS     | chr2:28351757-28352258    |
| PPP1R3A  | chr7:113687276-113688827  |
| OSTF1    | chr9:78054857-78055358    |
| GULP1    | chr2:189591710-189592555  |
| INO80C   | chr18:33018126-33018627   |
| RGS21    | chr1:192513949-192514450  |
| SPPL2A   | chr15:51118472-51118973   |
| AHR      | chr7:17701643-17703028    |
| LAMA1    | chr18:6876936-6877842     |
| FABP5    | chr8:82139216-82139717    |
| LASP1    | chr17:37294389-37296512   |

|           |                           |
|-----------|---------------------------|
| SVOP      | chr12:109299781-109300282 |
| MYO1B     | chr2:192501703-192503615  |
| ATG5      | chr6:106606937-106607438  |
| RAB27A    | chr15:55545356-55545857   |
| ZSWIM6    | chr5:60614726-60616475    |
| POSTN     | chr13:38112742-38114065   |
| MREG      | chr2:216525884-216526589  |
| SMOC2     | chr6:169433529-169437138  |
| ZNF92     | chr7:65263637-65264138    |
| C5orf20   | chr5:134772309-134776032  |
| GUCY1A3   | chr4:156559393-156562959  |
| HTR2B     | chr2:232107295-232107796  |
| PTTG2     | chr4:38372690-38373191    |
| KLF6      | chr10:4169790-4170291     |
| GUCY1A3   | chr4:156561547-156562831  |
| PTTG2     | chr4:38374477-38375671    |
| IFNE      | chr9:21575610-21577176    |
| TNFRSF13B | chr17:16808493-16808994   |
| CHIC2     | chr4:54727769-54729445    |
| UST       | chr6:149355479-149355980  |
| ZBED1     | chrX:1804076-1804577      |
| TEAD1     | chr11:13237542-13238746   |
| TAS2R40   | chr7:142937296-142937943  |
| COL1A2    | chr7:94045143-94053161    |
| GULP1     | chr2:189676180-189677737  |
| TFAP2C    | chr20:55639754-55642498   |
| ASB13     | chr10:5627207-5627834     |
| OTUD4     | chr4:146199782-146200964  |
| CEP128    | chr14:81236183-81236874   |
| CDK14     | chr7:90676366-90677411    |
| BMP7      | chr20:55449795-55450296   |
| AHR       | chr7:17718050-17721657    |
| MYH13     | chr17:10151770-10152271   |
| PIK3R1    | chr5:67410709-67411210    |
| CARD18    | chr11:105052248-105052749 |
| NHLH2     | chr1:116323294-116326069  |
| STEAP1    | chr7:89807911-89808412    |
| NREP      | chr5:111016712-111018570  |
| COL5A2    | chr2:189865035-189865668  |
| RBKS      | chr2:28353184-28353818    |
| HUNK      | chr21:33491711-33492212   |
| RALB      | chr2:121058084-121058724  |
| PTPRJ     | chr11:48022536-48023037   |
| CUL3      | chr2:225276365-225278672  |
| ABCC4     | chr13:95919431-95919932   |
| LCP1      | chr13:46753519-46754786   |
| CDC5L     | chr6:44609465-44609966    |
| TXNL1     | chr18:53790857-53792465   |
| ZNF574    | chr19:42615800-42616301   |
| HSD17B3   | chr9:98823828-98824329    |
| PCSK1     | chr5:95484831-95486878    |
| DIP2A     | chr21:47971450-47972810   |
| ZNF705B   | chr8:8153373-8154217      |
| PREP      | chr6:106034799-106035300  |
| BANP      | chr16:88335245-88340362   |
| ADAP2     | chr17:29279393-29280168   |

|         |                           |
|---------|---------------------------|
| S1PR3   | chr9:91769683-91770184    |
| VAPA    | chr18:10239475-10240655   |
| SNX30   | chr9:115624543-115625638  |
| METTL8  | chr2:172101553-172102054  |
| POSTN   | chr13:37881128-37881756   |
| AREL1   | chr14:75083007-75088249   |
| SETD4   | chr21:36840543-36841044   |
| AEBP2   | chr12:19777961-19778588   |
| ANGPTL2 | chr9:129921306-129923613  |
| CD53    | chr1:111327801-111331546  |
| BTG1    | chr12:91615111-91618423   |
| CDC25A  | chr3:48179191-48180035    |
| TMCO5A  | chr15:38342400-38343413   |
| POSTN   | chr13:38063423-38066451   |
| IGDCC4  | chr15:65701259-65701896   |
| PLAU    | chr10:75654013-75654514   |
| TM2D3   | chr15:102155728-102156229 |
| COL16A1 | chr1:32154419-32155578    |
| GAS1    | chr9:89589171-89589672    |
| NEGR1   | chr1:72122956-72126200    |
| LCP1    | chr13:46745898-46746864   |
| CHN1    | chr2:175700774-175702491  |
| PCSK1   | chr5:95561956-95563961    |
| POSTN   | chr13:38017359-38017860   |
| CACNG6  | chr19:54538636-54539271   |
| WNT5A   | chr3:55511144-55526179    |
| SMYD3   | chr1:245911068-245917390  |
| LTA4H   | chr12:96438615-96439116   |
| PRPF18  | chr10:14048872-14052755   |
| WNT5A   | chr3:55515028-55516034    |
| TOMM20  | chr1:235153771-235155299  |
| DNM3    | chr1:172348463-172354147  |
| DCTN5   | chr16:23681795-23682296   |
| POSTN   | chr13:37936985-37937908   |
| GAS1    | chr9:89023151-89023652    |
| FRY     | chr13:32785374-32787673   |
| SLC7A8  | chr14:23639983-23641128   |
| TMEM44  | chr3:194286536-194287239  |
| MYO1B   | chr2:192500312-192500938  |
| PTGDR   | chr14:52706884-52709097   |
| AZIN1   | chr8:103794954-103795590  |
| PEBP1   | chr12:118745016-118746246 |
| TUBD1   | chr17:57826541-57853759   |
| SLC14A1 | chr18:43381110-43384367   |
| ROS1    | chr6:117769067-117769701  |
| MREG    | chr2:216564861-216565715  |
| SKIDA1  | chr10:21687711-21688212   |
| DTD1    | chr20:18686543-18687044   |
| GULP1   | chr2:189760358-189766099  |
| ESD     | chr13:46913459-46913960   |
| RXRA    | chr9:137394354-137395068  |
| ZIC4    | chr3:146836709-146837456  |
| PAM     | chr5:102158300-102158934  |
| BANP    | chr16:88334875-88342762   |
| MZT2A   | chr2:132425601-132428239  |
| NREP    | chr5:111012666-111013389  |

|          |                           |
|----------|---------------------------|
| FZD6     | chr8:104357388-104358324  |
| ASB13    | chr10:5604965-5609495     |
| PREP     | chr6:106040422-106040923  |
| PRPF18   | chr10:14051439-14052496   |
| S100Z    | chr5:76151662-76152465    |
| SEMA3C   | chr7:80264344-80264845    |
| BARHL1   | chr9:135521528-135524447  |
| CDC5L    | chr6:44634461-44635826    |
| CTIF     | chr18:46364921-46366009   |
| MESDC2   | chr15:81384732-81385233   |
| EIF3H    | chr8:117434704-117437481  |
| S100A8   | chr1:153358436-153359094  |
| DEC1     | chr9:118358039-118359800  |
| COP22    | chr17:46078154-46081443   |
| MTBP     | chr8:121789637-121790138  |
| SNX13    | chr7:17505572-17506356    |
| DYM      | chr18:46578917-46579418   |
| C1QTNF3  | chr5:34051437-34055140    |
| BNIP2    | chr15:60095576-60096077   |
| FOXO1    | chr13:40348377-40353955   |
| FAM174A  | chr5:100113371-100114057  |
| CLIC6    | chr21:36361237-36362004   |
| DOCK8    | chr9:446219-446720        |
| POSTN    | chr13:37783058-37783559   |
| KIF26B   | chr1:246034109-246040639  |
| CCDC91   | chr12:28569265-28569766   |
| UBE2V2   | chr8:49331155-49332879    |
| RAD51B   | chr14:69224160-69225423   |
| ARL4C    | chr2:235073930-235075399  |
| FOXQ1    | chr6:1284863-1288538      |
| SLC5A3   | chr21:35706928-35709671   |
| GPCPD1   | chr20:5634087-5635336     |
| NUAK1    | chr12:105710670-105711444 |
| FANCL    | chr2:58266409-58267049    |
| TMX1     | chr14:51909933-51910434   |
| SOD2     | chr6:159797807-159798658  |
| AUH      | chr9:93732151-93732652    |
| DCLK2    | chr4:151200132-151203167  |
| ATG7     | chr3:11571027-11572511    |
| SOX4     | chr6:22025533-22027727    |
| OGDH     | chr7:44766904-44767563    |
| TGFBI    | chr5:135348090-135348752  |
| DLEU1    | chr13:50969677-50970178   |
| FER1L6   | chr8:124844469-124845768  |
| TARS     | chr5:33787664-33788165    |
| CDC5L    | chr6:44627769-44628555    |
| NEK7     | chr1:198462213-198462714  |
| GAS1     | chr9:89590295-89592296    |
| EFCAB1   | chr8:49191902-49192403    |
| PIK3AP1  | chr10:98500791-98501585   |
| WWC1     | chr5:167836169-167837126  |
| CACUL1   | chr10:120551575-120552251 |
| C10orf90 | chr10:128084826-128087080 |
| CLIC5    | chr6:45644871-45645652    |
| COL5A2   | chr2:189852918-189853892  |
| DUSP16   | chr12:12635550-12636228   |



|          |                           |
|----------|---------------------------|
| HDDC2    | chr6:125795456-125796171  |
| FAM122B  | chrX:133803400-133803901  |
| BBS9     | chr7:33809163-33811488    |
| TYRP1    | chr9:13014203-13014895    |
| GPR39    | chr2:133141590-133142091  |
| GULP1    | chr2:189464266-189465346  |
| IL19     | chr1:206997070-206997571  |
| PTCD2    | chr5:71799912-71801824    |
| BSX      | chr11:122727012-122728081 |
| CHIC2    | chr4:54553455-54554570    |
| HHIPL2   | chr1:222544958-222545459  |
| ABHD12   | chr20:25298093-25299140   |
| WNT5A    | chr3:55223369-55225301    |
| WISP1    | chr8:134161418-134166823  |
| RAP2B    | chr3:153331423-153333074  |
| HMCN1    | chr1:185941493-185942427  |
| SLA      | chr8:133957426-133959646  |
| THSD4    | chr15:71920197-71923963   |
| PREX1    | chr20:46558362-46559255   |
| MALT1    | chr18:56517151-56517652   |
| WNT5A    | chr3:54988354-54989120    |
| CLIC6    | chr21:36358330-36358831   |
| GULP1    | chr2:189754527-189770371  |
| CLLU1    | chr12:92963663-92964164   |
| MN1      | chr22:27528470-27531684   |
| HDDC2    | chr6:125698185-125699202  |
| MRVI1    | chr11:10612770-10615412   |
| ATP6V1G1 | chr9:117314383-117314884  |
| CHIC2    | chr4:54726989-54730288    |
| MREG     | chr2:216527553-216528982  |
| PREX1    | chr20:46555639-46556140   |
| SETD4    | chr21:36535776-36536277   |
| SEMA4D   | chr9:92098822-92099323    |
| NEK7     | chr1:198462017-198471065  |
| PPP1R3A  | chr7:113686203-113689790  |
| MED13L   | chr12:116818861-116821143 |
| MRC2     | chr17:60866965-60870303   |
| POSTN    | chr13:38015989-38027891   |
| UCK2     | chr1:165823055-165823911  |
| LTA4H    | chr12:96437667-96443263   |
| IFIH1    | chr2:163112487-163112988  |
| AMPH     | chr7:38389055-38390574    |
| GULP1    | chr2:189489146-189489973  |
| TXNL1    | chr18:54231977-54232478   |
| PCSK1    | chr5:95555631-95556132    |
| CLIC5    | chr6:45622123-45630467    |
| SNX13    | chr7:17621452-17622294    |
| F13A1    | chr6:6362959-6363460      |
| ADAMTS12 | chr5:33650474-33651109    |
| IFNE     | chr9:21549041-21564291    |
| ZNF532   | chr18:56605469-56605970   |
| GULP1    | chr2:189440477-189442752  |
| CEP128   | chr14:81235805-81239376   |
| DPYS     | chr8:105373054-105374451  |
| SLC14A1  | chr18:43381716-43382937   |
| ARHGAP28 | chr18:6627816-6629143     |

|            |                           |
|------------|---------------------------|
| ACTL8      | chr1:18201383-18201884    |
| SOX4       | chr6:21954299-21954981    |
| KCNC4      | chr1:110852010-110852511  |
| C10orf105  | chr10:73132203-73132704   |
| OSGEP      | chr14:20895956-20896913   |
| FANK1      | chr10:127916139-127916640 |
| NAV2       | chr11:20118142-20119462   |
| SFT2D1     | chr6:166672040-166672541  |
| GPD2       | chr2:158102463-158104137  |
| LRRC16A    | chr6:25403333-25408720    |
| BMP2       | chr20:7674787-7675483     |
| NALCN      | chr13:101528283-101528936 |
| AQP9       | chr15:58686475-58691075   |
| PHGDH      | chr1:120229591-120230092  |
| DNM3       | chr1:172246766-172248762  |
| GJA1       | chr6:122334481-122334982  |
| CUBN       | chr10:16870425-16871294   |
| ADAT2      | chr6:143496899-143498170  |
| POSTN      | chr13:37960076-37960577   |
| RBKS       | chr2:28310132-28310633    |
| ACTL7B     | chr9:110810602-110811291  |
| SETD4      | chr21:36561736-36562615   |
| NHLH2      | chr1:116322923-116326671  |
| ST6GALNAC3 | chr1:76719409-76719910    |
| EXOSC9     | chr4:122705602-122706103  |
| PTPRG      | chr3:62051355-62051856    |
| MARCH10    | chr17:60972771-60973272   |
| RFX8       | chr2:102011815-102013750  |
| SNX18      | chr5:54196549-54197518    |
| CD2AP      | chr6:47451913-47452414    |
| BNC2       | chr9:16963848-16964349    |
| GAS1       | chr9:89723727-89724733    |
| ZNF438     | chr10:31434783-31437061   |
| FZD6       | chr8:104359070-104361830  |
| OPCML      | chr11:131942315-131942965 |
| NHLRC1     | chr6:17993088-17993589    |
| VAPA       | chr18:10373465-10382570   |
| SNX13      | chr7:17646859-17649619    |
| PREX1      | chr20:46520827-46521328   |
| C14orf144  | chr14:104859756-104860257 |
| SPATS2L    | chr2:201036622-201037272  |
| POSTN      | chr13:38100358-38102540   |
| MREG       | chr2:216521830-216530931  |
| SOGA2      | chr18:8744585-8745335     |
| RBBP8      | chr18:20670881-20671382   |
| SOGA2      | chr18:8944257-8946138     |
| SLCO5A1    | chr8:70544809-70545310    |
| POSTN      | chr13:37700898-37703969   |
| GPR1       | chr2:207095262-207095969  |
| IL1R2      | chr2:102716773-102717274  |
| BMP4       | chr14:53628933-53629434   |
| GJA1       | chr6:122115408-122116138  |
| NUAK1      | chr12:106051377-106054853 |
| SETD4      | chr21:36933736-36938779   |
| SOGA2      | chr18:8960037-8962493     |
| DRD1       | chr5:174224803-174226441  |

|              |                           |
|--------------|---------------------------|
| THBS1        | chr15:39542764-39544006   |
| ZIC4         | chr3:146687296-146689220  |
| ETV6         | chr12:12110781-12112938   |
| RXRA         | chr9:137435466-137439226  |
| C10orf90     | chr10:128109375-128110140 |
| SNAI2        | chr8:49814862-49817402    |
| C14orf1      | chr14:76081208-76081709   |
| PRKG1        | chr10:52761033-52761534   |
| M1AP         | chr2:74795390-74795891    |
| ROR2         | chr9:94308081-94310144    |
| PREX1        | chr20:46465291-46466011   |
| FZD2         | chr17:42611306-42611969   |
| SAMD9        | chr7:92532365-92535225    |
| ACPL2        | chr3:14105511-141056012   |
| AHR          | chr7:17698688-17701008    |
| POSTN        | chr13:38057702-38062599   |
| SSTR4        | chr20:22885623-22886124   |
| TMCC2        | chr1:205270555-205271345  |
| TMED7-TICAM2 | chr5:114918685-114919889  |
| BAALC        | chr8:104197059-104197839  |
| TENM2        | chr5:167231309-167231810  |
| PREX1        | chr20:46644927-46646418   |
| PTPRZ1       | chr7:121384728-121385369  |
| TUBD1        | chr17:57843480-57846396   |
| VAPA         | chr18:10297205-10308060   |
| TRPM8        | chr2:234939410-234942589  |
| ADAMTS2      | chr5:178803914-178807478  |
| RNF111       | chr15:59268256-59268757   |
| MNDA         | chr1:158789685-158790186  |
| ARL4C        | chr2:235154126-235155622  |
| GJA1         | chr6:122336946-122337447  |
| NTM          | chr11:131630527-131631028 |
| NCAPH        | chr2:97063346-97063847    |
| GGTLC2       | chr22:23128916-23136144   |
| NREP         | chr5:111280726-111287438  |
| GULP1        | chr2:189532514-189534776  |
| SETD4        | chr21:36584508-36585175   |
| RASGRP1      | chr15:39005821-39008449   |
| COL27A1      | chr9:117038330-117039022  |
| MTX2         | chr2:177284106-177284607  |
| TPGS2        | chr18:33888756-33891022   |
| ABCC4        | chr13:95919208-95921630   |
| TTLL5        | chr14:76296569-76300362   |
| CCNJ         | chr10:98018098-98018599   |
| TMEM30A      | chr6:75982257-75983128    |
| ABHD2        | chr15:89609527-89614830   |
| ADAP2        | chr17:29281410-29282254   |
| POSTN        | chr13:37737090-37737591   |
| DNM3         | chr1:172352055-172352739  |
| ARHGAP29     | chr1:94781131-94781632    |
| CFDP1        | chr16:75336123-75336624   |
| ACKR3        | chr2:237676303-237679959  |
| DIRAS2       | chr9:92445425-92446207    |
| TTC28        | chr22:28536959-28537627   |
| VWA8         | chr13:42187143-42190291   |
| SMIM2        | chr13:44404321-44405013   |

|          |                           |
|----------|---------------------------|
| BTG1     | chr12:91643816-91646331   |
| ZBTB20   | chr3:114050661-114051499  |
| PLK2     | chr5:56834595-56835286    |
| CALM2    | chr2:47417135-47417636    |
| TBC1D9   | chr4:141639848-141640539  |
| CLEC3B   | chr3:45145751-45148852    |
| CDH11    | chr16:65579692-65583895   |
| POSTN    | chr13:37742464-37752736   |
| UBR5     | chr8:103379685-103381394  |
| ZNF131   | chr5:42983805-42986970    |
| RNF121   | chr11:71655546-71656513   |
| POSTN    | chr13:38053352-38069734   |
| PDP1     | chr8:95111440-95114880    |
| LGALS9B  | chr17:20110363-20110864   |
| TMEM26   | chr10:63022808-63023309   |
| GULP1    | chr2:189748006-189749093  |
| GUCY1A3  | chr4:156523312-156524710  |
| SOX4     | chr6:22236710-22237591    |
| RPGRIP1L | chr16:53699484-53700110   |
| PLAC1    | chrX:133683067-133685735  |
| CAND1    | chr12:67774766-67777347   |
| FRY      | chr13:32784859-32788429   |
| SCG5     | chr15:32979168-32979669   |
| POSTN    | chr13:38054970-38055637   |
| POSTN    | chr13:38056179-38056680   |
| COL5A1   | chr9:137705532-137706535  |
| ARL4C    | chr2:235149888-235150660  |
| DUSP6    | chr12:89176203-89176704   |
| TXNL1    | chr18:53789595-53793233   |
| SETD4    | chr21:36721121-36727808   |
| NRP1     | chr10:33522009-33522926   |
| KIAA1586 | chr6:56776347-56777957    |
| DEC1     | chr9:117967356-117969940  |
| BTG1     | chr12:91757710-91758211   |
| KIF26B   | chr1:246164937-246165438  |
| HOXB1    | chr17:46558623-46565762   |
| TG       | chr8:134027929-134030278  |
| ADAMTS2  | chr5:178803841-178805854  |
| SHROOM3  | chr4:77674420-77676497    |
| GULP1    | chr2:189438169-189439453  |
| PELI2    | chr14:56800026-56801184   |
| DEC1     | chr9:118789965-118790610  |
| PDE4B    | chr1:66954038-66962433    |
| CBR4     | chr4:169542882-169544028  |
| VAPA     | chr18:10039980-10040990   |
| PEBP1    | chr12:118743976-118746789 |
| TOP2B    | chr3:25551185-25551686    |
| SPATS2L  | chr2:201036161-201038983  |
| MREG     | chr2:216529740-216530241  |
| ADGB     | chr6:147360502-147361136  |
| MYO1B    | chr2:192266279-192266780  |
| RBKS     | chr2:28303135-28304896    |
| PDP1     | chr8:95176601-95178433    |
| PIK3R5   | chr17:8826124-8826625     |
| KCNU1    | chr8:37273595-37274096    |
| GUCY1A2  | chr11:106268993-106269849 |

|          |                           |
|----------|---------------------------|
| PTGFR    | chr1:79026820-79027321    |
| COL6A3   | chr2:238005870-238006502  |
| ZZZ3     | chr1:77836120-77836621    |
| OPCML    | chr11:131941297-131941798 |
| DACT1    | chr14:59281650-59282151   |
| PARP12   | chr7:139530373-139530874  |
| OSTF1    | chr9:78056152-78057619    |
| DPYS     | chr8:105372069-105375062  |
| OXCT1    | chr5:41795041-41795542    |
| ROCK1    | chr18:18743105-18744274   |
| FILIP1L  | chr3:99427570-99428384    |
| TEAD1    | chr11:13236247-13239360   |
| RPS24    | chr10:80477727-80478228   |
| DOCK2    | chr5:169230418-169231176  |
| TBATA    | chr10:72452707-72456116   |
| RGS6     | chr14:73109305-73111027   |
| DOCK10   | chr2:225746389-225747066  |
| CARD18   | chr11:105050950-105054706 |
| TENM2    | chr5:167125658-167126472  |
| ZNF354C  | chr5:178733446-178734466  |
| DUSP16   | chr12:12540285-12540786   |
| MALT1    | chr18:56467242-56468960   |
| MED21    | chr12:27329236-27334780   |
| MDGA1    | chr6:37682060-37682561    |
| COL6A3   | chr2:238031538-238032039  |
| KAT6B    | chr10:76802253-76802754   |
| TYW5     | chr2:200992139-200992640  |
| TMEM51   | chr1:15585845-15586476    |
| EFR3A    | chr8:132826107-132830813  |
| PSKH2    | chr8:86853729-86856299    |
| ZNF281   | chr1:200148782-200149435  |
| TIAM2    | chr6:155253072-155255197  |
| NEK7     | chr1:198463358-198464315  |
| PLXDC2   | chr10:20914088-20914589   |
| FMN1     | chr15:33131115-33131616   |
| PSMB1    | chr6:170714733-170715415  |
| PDP1     | chr8:95111119-95116972    |
| INHBA    | chr7:40854630-40855131    |
| TLK2     | chr17:60690891-60691392   |
| CDC25A   | chr3:48178680-48180051    |
| RAP2B    | chr3:153330667-153334051  |
| ADTRP    | chr6:11609111-11609753    |
| PREX1    | chr20:46520730-46521672   |
| SLC25A26 | chr3:66353216-66354023    |
| PIEZO2   | chr18:11246243-11246931   |
| CNGA3    | chr2:98950194-98950956    |
| CXorf36  | chrX:45337840-45339157    |
| CADPS    | chr3:62571178-62574416    |
| EIF5     | chr14:103827566-103829194 |
| MARCH10  | chr17:60901884-60902385   |
| TCF4     | chr18:52804510-52809810   |
| SOST     | chr17:41811231-41811732   |
| TRIO     | chr5:14574437-14575097    |
| TCF4     | chr18:52806274-52807379   |
| IRAK3    | chr12:66661211-66663961   |
| TPGS2    | chr18:33895313-33895965   |

|           |                           |
|-----------|---------------------------|
| GORAB     | chr1:170587150-170590286  |
| SETD4     | chr21:36952679-36954099   |
| SLC38A4   | chr12:47308159-47308660   |
| GRIA2     | chr4:159043336-159044017  |
| CREB1     | chr2:208258706-208260756  |
| SNAI2     | chr8:49814457-49818157    |
| ING1      | chr13:111684375-111685005 |
| THBS1     | chr15:39539841-39541331   |
| AP4E1     | chr15:51496554-51497055   |
| SETD4     | chr21:36721010-36724347   |
| PHYHIP1L  | chr10:61321536-61322037   |
| PLCH1     | chr3:154959073-154959574  |
| OLIG3     | chr6:137959646-137960147  |
| THSD4     | chr15:71919038-71929263   |
| CD163     | chr12:7651931-7652704     |
| LMCD1     | chr3:8663815-8664640      |
| IL1R2     | chr2:102715395-102718897  |
| C11orf73  | chr11:86226317-86227839   |
| IFNE      | chr9:21579256-21579757    |
| ADAM10    | chr15:58809495-58810227   |
| JUN       | chr1:59391639-59400450    |
| NEDD4     | chr15:56201537-56202038   |
| BAALC     | chr8:104240934-104243306  |
| CHN1      | chr2:175698486-175703300  |
| FAT2      | chr5:150858563-150864769  |
| APOBEC1   | chr12:7708836-7709337     |
| SPATS2L   | chr2:201089984-201090485  |
| RAB8B     | chr15:63542796-63543436   |
| TFAP2C    | chr20:55606310-55606811   |
| XXYL1     | chr3:194918387-194919086  |
| MYH3      | chr17:10459523-10460316   |
| SUCLA2    | chr13:47911945-47912446   |
| TMEM44    | chr3:194285862-194288019  |
| COL5A1    | chr9:137713825-137714326  |
| MYO1B     | chr2:192301384-192302486  |
| SLC35F5   | chr2:114518497-114520990  |
| NR5A2     | chr1:200336629-200338021  |
| C7orf10   | chr7:41136199-41138863    |
| POSTN     | chr13:37738307-37739633   |
| CLIC5     | chr6:45591713-45594959    |
| CFL2      | chr14:35119020-35120077   |
| HOXD10    | chr2:176794395-176794896  |
| TNFRSF11B | chr8:119269320-119269821  |
| SRSF7     | chr2:38923614-38924115    |
| FABP12    | chr8:82408410-82414323    |
| CDH11     | chr16:65579209-65584032   |
| ADAMTS12  | chr5:33649033-33651641    |
| GNA12     | chr7:2748476-2751528      |
| GRB10     | chr7:50677913-50678414    |
| ZCCHC4    | chr4:25332446-25333927    |
| ARHGAP26  | chr5:142601783-142602720  |
| DUSP16    | chr12:12532307-12533211   |
| PPP2R4    | chr9:131999701-132000202  |
| ZNF831    | chr20:57740572-57741208   |
| ATXN1     | chr6:16436888-16437541    |
| SAMHD1    | chr20:35559631-35560132   |

|          |                           |
|----------|---------------------------|
| SBF1     | chr22:50799519-50800218   |
| ARHGAP35 | chr19:47434243-47442942   |
| TMEM211  | chr22:25461665-25469259   |
| TRAF1    | chr9:123654329-123654830  |
| CD27     | chr12:6551875-6558495     |
| ALDH1L2  | chr12:105431097-105431787 |
| DBH      | chr9:136563738-136569315  |
| CD2      | chr1:117352773-117353814  |
| FAM84B   | chr8:126660265-126661488  |
| P2RY8    | chrX:1585235-1591846      |
| NARS2    | chr11:78174949-78178247   |
| MYO1G    | chr7:44931253-44931931    |
| PPP2R5C  | chr14:102285292-102285793 |
| EOMES    | chr3:27680363-27682052    |
| CDYL2    | chr16:80689801-80691838   |
| SARDH    | chr9:136542882-136543743  |
| OR4E2    | chr14:22988957-22991169   |
| ADRB1    | chr10:115719515-115721019 |
| RHOH     | chr4:40300256-40314920    |
| CASP10   | chr2:202116804-202117305  |
| CDHR3    | chr7:105445016-105451645  |
| DMRTB1   | chr1:53873161-53882368    |
| KLF6     | chr10:3798399-3798900     |
| ODF2L    | chr1:86853842-86857120    |
| LYRM7    | chr5:130589875-130590376  |
| TIAM1    | chr21:32556469-32556970   |
| PDE2A    | chr11:72230273-72232151   |
| CDYL2    | chr16:80690240-80690741   |
| EEF1A1   | chr6:74180645-74181146    |
| OR4E2    | chr14:22992853-22993354   |
| DBH      | chr9:136566201-136568675  |
| DPH5     | chr1:101414591-101417104  |
| AKAP7    | chr6:131601702-131604222  |
| GRAMD4   | chr22:47009079-47009747   |
| ANKRD46  | chr8:101506083-101507823  |
| SPP2     | chr2:235397333-235399252  |
| MAN1A1   | chr6:119635111-119636053  |
| SARDH    | chr9:136540408-136544499  |
| RHOH     | chr4:40244627-40245128    |
| OR4E2    | chr14:23000536-23002649   |
| ESR1     | chr6:152502544-152509757  |
| ZNF831   | chr20:57738269-57739512   |
| HERPUD2  | chr7:35768562-35769063    |
| ATP5O    | chr21:35306739-35307240   |
| OR4E2    | chr14:22994167-22994668   |
| CCDC88C  | chr14:91868623-91869580   |
| ITK      | chr5:156621118-156621768  |
| LTBR     | chr12:6532643-6538261     |
| SLAMF6   | chr1:160396593-160403694  |
| VPS45    | chr1:150077080-150085546  |
| OR4N4    | chr15:22547432-22558028   |
| OR4E2    | chr14:22978080-22979642   |
| SLAMF6   | chr1:160398669-160400247  |
| COTL1    | chr16:84580983-84589583   |
| RPAP3    | chr12:47785242-47786379   |
| RASGRP1  | chr15:38958846-38967781   |

|            |                          |
|------------|--------------------------|
| SLC14A2    | chr18:43245932-43246433  |
| RHOH       | chr4:40190281-40236501   |
| LSM14A     | chr19:34840730-34841231  |
| TNRC6B     | chr22:40720101-40720802  |
| FAM210A    | chr18:13376829-13378206  |
| SNX11      | chr17:46502910-46508324  |
| B4GALT5    | chr20:48286296-48286797  |
| MB21D1     | chr6:74131890-74132391   |
| TSPAN3     | chr15:77305365-77305866  |
| C2CD5      | chr12:22558935-22571599  |
| TRAF6      | chr11:36443096-36443722  |
| MCTP1      | chr5:94127733-94131451   |
| TRERF1     | chr6:42353871-42363833   |
| DUSP16     | chr12:12537405-12537906  |
| RTN4IP1    | chr6:106970350-106970851 |
| MAP2K2     | chr19:4108186-4110586    |
| GTF3C1     | chr16:27416994-27417653  |
| ANKRD44    | chr2:198058554-198083702 |
| ZNF438     | chr10:30991593-30992094  |
| ZNF80      | chr3:113930069-113946920 |
| ABCC6      | chr16:16054652-16055758  |
| LPGAT1     | chr1:211854593-211855094 |
| GRAMD4     | chr22:47008011-47010947  |
| H3F3C      | chr12:31960139-31960640  |
| SMARCE1    | chr17:38754246-38755318  |
| CD6        | chr11:60807126-60811572  |
| RHOH       | chr4:40302186-40303377   |
| OSBPL7     | chr17:45808380-45815157  |
| SLC35B1    | chr17:47821985-47828708  |
| PPP1R16B   | chr20:37470694-37471333  |
| ATG16L1    | chr2:234173752-234181486 |
| NPIP81     | chr16:29018458-29026471  |
| CSGALNACT1 | chr8:19483727-19484228   |
| GRAP2      | chr22:40299270-40299771  |
| ARHGAP35   | chr19:47436878-47439149  |
| FAM192A    | chr16:57038362-57038863  |
| SLAMF1     | chr1:160605661-160618700 |
| SLC35G3    | chr17:33487097-33490110  |
| PREP       | chr6:105903810-105904311 |
| PREP       | chr6:105900063-105911501 |
| PRDM2      | chr1:14059437-14060884   |
| GPR114     | chr16:57633161-57638132  |
| MPRIP      | chr17:17083446-17083947  |
| C1QTNF6    | chr22:37562925-37564462  |
| SPAG6      | chr10:22943544-22944045  |
| DLEU1      | chr13:50996471-50997129  |
| PAG1       | chr8:82009131-82009632   |
| RASGRP1    | chr15:38964261-38964762  |
| PSMA1      | chr11:14598605-14602616  |
| CLECL1     | chr12:9814544-9832825    |
| RAP1A      | chr1:112140417-112140918 |
| HIVEP1     | chr6:12051910-12053364   |
| ATP5O      | chr21:35308394-35309952  |
| C1QTNF6    | chr22:37565062-37565563  |
| CXCR6      | chr3:46015723-46016224   |
| SV2C       | chr5:75620153-75625379   |



|         |                           |
|---------|---------------------------|
| PTGER4  | chr5:40383416-40384091    |
| RPS6KA2 | chr6:166829808-166830455  |
| APOL1   | chr22:36771965-36773098   |
| PPP3CA  | chr4:101938388-101944356  |
| SNCA    | chr4:90216544-90217045    |
| ESR1    | chr6:152492422-152493070  |
| IKZF3   | chr17:37922658-37941763   |
| TMEM211 | chr22:25456883-25459564   |
| EIF4E3  | chr3:71542107-71542608    |
| MDGA1   | chr6:37480289-37487227    |
| KANSL1  | chr17:44095444-44099584   |
| CD6     | chr11:60842562-60851807   |
| C2orf40 | chr2:106772689-106779594  |
| PDHX    | chr11:35099577-35100963   |
| FIGNL1  | chr7:50419582-50420083    |
| CCDC141 | chr2:179894325-179898700  |
| UBE2E3  | chr2:181989309-181989810  |
| LIG3    | chr17:33371134-33382038   |
| C2CD5   | chr12:22560578-22565481   |
| P2RY10  | chrX:78361984-78365900    |
| LGMN    | chr14:93034968-93035469   |
| MSI2    | chr17:55678822-55679323   |
| SRSF7   | chr2:38890142-38899942    |
| PRKAG2  | chr7:151465483-151466312  |
| JDP2    | chr14:75980577-75982199   |
| SPATA13 | chr13:24838950-24839640   |
| ZC3H8   | chr2:112912712-112913365  |
| YWHAQ   | chr2:9821393-9821894      |
| OR4E2   | chr14:23010271-23010772   |
| ELOVL5  | chr6:53196661-53204092    |
| TMEM66  | chr8:29353764-29358817    |
| PTPRJ   | chr11:48023823-48024324   |
| TPST2   | chr22:26974954-26976094   |
| PPARD   | chr6:35315991-35316492    |
| OR4E2   | chr14:22941652-23040684   |
| HTT     | chr4:3204336-3204837      |
| PRDM8   | chr4:81091194-81096210    |
| IQGAP3  | chr1:156493112-156496578  |
| LANCL2  | chr7:55603327-55603828    |
| CD28    | chr2:204718786-204719287  |
| IKZF3   | chr17:38016530-38024959   |
| CLMP    | chr11:122940932-122941433 |
| NARS2   | chr11:78176049-78176550   |
| TMEM66  | chr8:29846506-29854854    |
| SOBP    | chr6:108139540-108146695  |
| GPR114  | chr16:57634252-57635560   |
| OR4E2   | chr14:23013104-23013864   |
| ATP5O   | chr21:35303467-35312234   |
| ANKRD46 | chr8:101398501-101399163  |
| CDC14A  | chr1:100862734-100863235  |
| CRB2    | chr9:126083867-126086186  |
| MAN1A2  | chr1:118206587-118207088  |
| FGD3    | chr9:95721995-95735525    |
| KPNB1   | chr17:45735264-45738961   |
| CILP2   | chr19:19713059-19713560   |
| FIGNL1  | chr7:50354220-50356220    |

|          |                           |
|----------|---------------------------|
| USP3     | chr15:63772085-63772586   |
| CLIC5    | chr6:45978658-45979159    |
| AFAP1    | chr4:7857178-7857679      |
| CARS     | chr11:3034690-3035316     |
| AMZ2     | chr17:66249598-66250248   |
| CD70     | chr19:6536521-6537022     |
| LAMA3    | chr18:21573767-21574637   |
| KATNAL1  | chr13:30476809-30478393   |
| RD3      | chr1:211526272-211526773  |
| ANKH     | chr5:14705604-14707602    |
| SLAMF6   | chr1:160406457-160409253  |
| PTGDR    | chr14:52735194-52735695   |
| FAM84B   | chr8:126618587-126620095  |
| CXCR5    | chr11:118742870-118750542 |
| PRKCH    | chr14:61802702-61803203   |
| SARDH    | chr9:136545235-136551671  |
| SPAG16   | chr2:214103336-214104897  |
| CD6      | chr11:60827940-60828599   |
| RPS6KA2  | chr6:166833295-166833796  |
| FAM65B   | chr6:24927627-24942270    |
| COLGALT2 | chr1:183923694-183928035  |
| USP6NL   | chr10:11192089-11192590   |
| PPP3CA   | chr4:101940355-101940988  |
| KATNAL1  | chr13:30715871-30728683   |
| TMEM154  | chr4:153505069-153508734  |
| SLC35G5  | chr8:11314595-11315560    |
| RD3      | chr1:211508663-211509419  |
| LAMA3    | chr18:21572353-21573154   |
| USP6NL   | chr10:11185978-11195884   |
| ERN1     | chr17:62128029-62128530   |
| RASGRF2  | chr5:80302830-80303331    |
| ZNRF1    | chr16:75109533-75110168   |
| CD2      | chr1:117340474-117360707  |
| FITM2    | chr20:42845751-42849106   |
| KMT2C    | chr7:151841509-151842677  |
| TMEM200B | chr1:29251084-29257870    |
| CLDN23   | chr8:8729451-8730296      |
| KCNA3    | chr1:111209329-111218516  |
| GDPD4    | chr11:76864229-76864881   |
| ATXN1    | chr6:16420380-16422367    |
| LMO4     | chr1:88702128-88702629    |
| SPAG6    | chr10:22929210-22948260   |
| ABHD17B  | chr9:74398436-74398937    |
| DCP1B    | chr12:2102864-2103365     |
| COX10    | chr17:14104026-14105710   |
| ZNF367   | chr9:99160478-99162936    |
| CNIH3    | chr1:224810344-224813035  |
| CXCR4    | chr2:136892297-136893857  |
| CXCR6    | chr3:46017050-46018020    |
| ZNF200   | chr16:3264400-3266942     |
| ZBTB20   | chr3:114008486-114021822  |
| MYOM1    | chr18:3056838-3063313     |
| HERC1    | chr15:64000794-64001295   |
| C5orf64  | chr5:61552006-61552648    |
| VLDLR    | chr9:2655083-2655737      |
| TRAF6    | chr11:36396380-36403320   |

|          |                           |
|----------|---------------------------|
| LTBR     | chr12:6535750-6536417     |
| ZDHH19   | chr3:195913315-195914520  |
| PRSS1    | chr7:142498598-142499099  |
| DNAJC16  | chr1:15904965-15906724    |
| CTCFL    | chr20:55973542-55974630   |
| C16orf54 | chr16:29713011-29713512   |
| KPNA2    | chr17:66176604-66182402   |
| CALHM3   | chr10:105224843-105233473 |
| GGTLC2   | chr22:23155462-23166922   |
| NPIPB11  | chr16:29159873-29160374   |
| ARHGAP35 | chr19:47452870-47463947   |
| RFX7     | chr15:56335080-56335720   |
| TRAF1    | chr9:123685662-123688563  |
| CHRNA2   | chr8:27238001-27238502    |
| SNCA     | chr4:90208827-90210028    |
| ALCAM    | chr3:105471551-105472052  |
| STARD7   | chr2:96829225-96830452    |
| TMEM211  | chr22:25463184-25465082   |
| FYCO1    | chr3:46006299-46006938    |
| MYO1B    | chr2:192068785-192070036  |
| GM2A     | chr5:150590241-150592530  |
| FGFR10P  | chr6:167459762-167462850  |
| DNAJC16  | chr1:15903758-15907492    |
| ATM      | chr11:108095665-108097584 |
| IL12RB1  | chr19:18230008-18230780   |
| CPSF6    | chr12:69721582-69727207   |
| MAN1C1   | chr1:26099254-26103077    |
| DLEU1    | chr13:50938744-50942273   |
| COL15A1  | chr9:101815563-101816064  |
| C1GALT1  | chr7:7195389-7200309      |
| CD2      | chr1:117305346-117306342  |
| RGS3     | chr9:116278109-116283606  |
| P2RY8    | chrX:1598609-1603589      |
| RAB27A   | chr15:55567027-55579060   |
| ADCY10   | chr1:167772098-167775179  |
| ATXN3L   | chrX:13111458-13113409    |
| CYTIP    | chr2:158288556-158304949  |
| MTERF    | chr7:90956220-90956721    |
| RSPH1    | chr21:43825004-43826010   |
| UST      | chr6:149469030-149469531  |
| ZFP64    | chr20:51026207-51028124   |
| ABHD17B  | chr9:74407243-74412420    |
| NEDD9    | chr6:11258748-11259582    |
| OR4E2    | chr14:22986357-22987952   |
| GTF3C1   | chr16:27411366-27422273   |
| BFSP2    | chr3:133224462-133226352  |
| SMARCE1  | chr17:38758841-38759342   |
| SLC37A3  | chr7:139910043-139910544  |
| GPR114   | chr16:57609963-57614294   |
| PCNX     | chr14:71608704-71609205   |
| CD2      | chr1:117349974-117351969  |
| ZNF831   | chr20:57720964-57723321   |
| DOCK8    | chr9:277988-278656        |
| GBP5     | chr1:89733638-89755573    |
| TNFRSF9  | chr1:7989430-7992551      |
| RPAP3    | chr12:47598926-47618881   |

|          |                           |
|----------|---------------------------|
| CXCL12   | chr10:44748916-44749417   |
| RDM1     | chr17:34219623-34220254   |
| ZDHC18   | chr1:27159558-27160059    |
| IKZF3    | chr17:37946630-37953072   |
| BMP10    | chr2:68986025-69008421    |
| SPN      | chr16:29672362-29679325   |
| FAM9C    | chrX:13014963-13029511    |
| COX10    | chr17:14094736-14110500   |
| POU2F1   | chr1:167417553-167418250  |
| IFI6     | chr1:27989245-27990014    |
| FYCO1    | chr3:45990398-45993692    |
| GAK      | chr4:871855-874410        |
| SRSF7    | chr2:38924899-38925400    |
| PLCL2    | chr3:16882646-16886399    |
| P2RY10   | chrX:78363671-78364595    |
| PRSS1    | chr7:142500062-142500563  |
| CNOT6L   | chr4:78748059-78748560    |
| PRSS1    | chr7:142505975-142506476  |
| CDNF     | chr10:14603768-14605081   |
| DNMT1    | chr19:10251123-10257544   |
| TSGA10   | chr2:99386436-99386937    |
| SUCNR1   | chr3:151968729-151978317  |
| RSPH1    | chr21:43821261-43829736   |
| FUT8     | chr14:65753177-65759420   |
| GALM     | chr2:38936957-38937458    |
| RASGRP1  | chr15:38938927-38947031   |
| TMPRSS13 | chr11:117814861-117825540 |
| TLE3     | chr15:69760772-69761640   |
| C19orf12 | chr19:30162047-30164118   |
| SLC35B1  | chr17:47823604-47825305   |
| ANTXRL   | chr10:47638687-47642649   |
| FAM174A  | chr5:100188678-100190404  |
| PCNX     | chr14:71448858-71449359   |
| GTF2H5   | chr6:158710467-158713028  |
| UBE2D2   | chr5:138944791-138945757  |
| CRABP1   | chr15:78682257-78682758   |
| OXNAD1   | chr3:16522248-16523945    |
| FCHSD2   | chr11:72862172-72871257   |
| ATXN1L   | chr16:71915372-71915873   |
| CDNF     | chr10:14627708-14628209   |
| TMEM66   | chr8:29346619-29352035    |
| DAXX     | chr6:33309151-33313927    |
| RAC2     | chr22:37624524-37626916   |
| ANKH     | chr5:14925656-14926157    |
| ZNF318   | chr6:43349854-43353356    |
| CASP12   | chr11:104668618-104670875 |
| UST      | chr6:149458842-149463590  |
| NRP1     | chr10:33442255-33443543   |
| LRRRC8C  | chr1:90204943-90205444    |
| TNFSF14  | chr19:6666821-6671251     |
| METTL8   | chr2:172175545-172176046  |
| SLFN14   | chr17:33860038-33863132   |
| GRB10    | chr7:50728475-50732422    |
| VCPIP1   | chr8:67576155-67576656    |
| PARP8    | chr5:49931173-49931674    |
| RDM1     | chr17:34214569-34221716   |

|           |                          |
|-----------|--------------------------|
| APOL6     | chr22:36055450-36057247  |
| BTG1      | chr12:92267056-92273545  |
| RFTN1     | chr3:16338999-16362011   |
| TMEM211   | chr22:25458198-25458901  |
| BIN2      | chr12:51714523-51715024  |
| CHI3L2    | chr1:111768785-111769466 |
| ANKH      | chr5:14992975-14993476   |
| ZNF70     | chr22:24036346-24039988  |
| ATG16L1   | chr2:234178431-234180388 |
| RYR1      | chr19:39027078-39030995  |
| E2F3      | chr6:20364909-20369239   |
| ACVR1C    | chr2:158325375-158326145 |
| TOX       | chr8:59711075-59721331   |
| LPXN      | chr11:58292777-58293278  |
| RYR1      | chr19:39028530-39030464  |
| MYOM1     | chr18:3059869-3061599    |
| EMILIN2   | chr18:2982378-2982879    |
| CD2       | chr1:117277788-117285090 |
| SNCA      | chr4:90202489-90230019   |
| GSG2      | chr17:3669192-3669900    |
| ATAD2     | chr8:124398319-124399034 |
| MCM3      | chr6:52167743-52174527   |
| ATOH8     | chr2:86078379-86081854   |
| EPS15L1   | chr19:16479051-16479910  |
| SLAMF1    | chr1:160608287-160609003 |
| NCK2      | chr2:106352782-106359090 |
| WDR43     | chr2:29230923-29241709   |
| GPR20     | chr8:142255361-142256160 |
| ELOVL5    | chr6:53199626-53201609   |
| GPR20     | chr8:142253897-142256794 |
| CPSF6     | chr12:69724758-69725519  |
| SNCA      | chr4:90236681-90240393   |
| EIF4E3    | chr3:71499999-71507918   |
| TAGAP     | chr6:159474643-159488174 |
| ESM1      | chr5:53905928-53906557   |
| NDC80     | chr18:2641792-2642293    |
| KRTAP12-3 | chr21:46077888-46078389  |
| KLF6      | chr10:3919311-3920311    |
| CCNG2     | chr4:78114211-78116494   |
| CHRNA2    | chr8:27231840-27240371   |
| ZDHHC14   | chr6:157956243-157957704 |
| ZC3H8     | chr2:112943583-112947475 |
| C14orf159 | chr14:91698131-91699157  |
| EMILIN2   | chr18:2968151-2968854    |
| DERL3     | chr22:24186917-24187418  |
| ACPL2     | chr3:140984807-140987281 |
| GPR126    | chr6:143234678-143235179 |
| FANCA     | chr16:89826373-89832390  |
| CD2       | chr1:117280415-117281933 |
| TIAM1     | chr21:32531910-32532411  |
| TG        | chr8:134069523-134070217 |
| BCL6      | chr3:187691411-187694767 |
| IQGAP2    | chr5:75838150-75840354   |
| CD2       | chr1:117299288-117300087 |
| CIITA     | chr16:11326610-11328178  |
| WNK1      | chr12:838082-838789      |

|         |                           |
|---------|---------------------------|
| SETBP1  | chr18:42339339-42340034   |
| KLHL22  | chr22:20816697-20821237   |
| RPL39L  | chr3:186742777-186744028  |
| FNDC3A  | chr13:49720783-49721674   |
| USP3    | chr15:63790566-63791331   |
| EOMES   | chr3:27521319-27522240    |
| STXBP1  | chr9:130482072-130482573  |
| VPS13A  | chr9:80091094-80091893    |
| GPR114  | chr16:57622389-57629119   |
| CTLA4   | chr2:204735016-204736349  |
| ARHGEF2 | chr1:155916098-155916913  |
| RORA    | chr15:60875400-60876780   |
| FUT8    | chr14:65753685-65754352   |
| ELOVL5  | chr6:53096674-53097175    |
| NGF     | chr1:115641629-115643205  |
| MED15   | chr22:20911343-20912034   |
| RHOH    | chr4:40200925-40202457    |
| DAPK2   | chr15:64183125-64187145   |
| POFUT2  | chr21:46498037-46499003   |
| OR4E2   | chr14:22976227-22976728   |
| SUPT4H1 | chr17:56421170-56422568   |
| COL5A2  | chr2:189848356-189849978  |
| BMP10   | chr2:68964583-68965378    |
| FAM174A | chr5:100224131-100228882  |
| MSI2    | chr17:55680085-55681365   |
| DMRTB1  | chr1:53877500-53879077    |
| NUP214  | chr9:134107393-134115052  |
| TOX2    | chr20:42696859-42700417   |
| TNIP3   | chr4:122101662-122104855  |
| GPR183  | chr13:100004564-100005065 |
| ZNF367  | chr9:99161198-99161699    |
| OPTC    | chr1:203575533-203576885  |
| FAHD2B  | chr2:97578809-97579600    |
| B3GNTL1 | chr17:80842766-80844381   |
| CHI3L2  | chr1:111754555-111772794  |
| ECHDC2  | chr1:53096959-53104969    |
| ETS1    | chr11:128494578-128495716 |
| SLC52A1 | chr17:4948010-4955044     |
| PITPNC1 | chr17:65432046-65432547   |
| PRMT7   | chr16:68449932-68452548   |
| ZFYVE28 | chr4:2292290-2293701      |
| NFATC3  | chr16:68104167-68104668   |
| CD3D    | chr11:118203704-118219102 |
| OR4N4   | chr15:22459491-22469012   |
| LRRRC8D | chr1:90320406-90321047    |
| TBX19   | chr1:168408708-168409209  |
| CCDC91  | chr12:29255144-29258680   |
| SEPT9   | chr17:75435395-75438444   |
| SLFN14  | chr17:33863857-33865691   |
| PECR    | chr2:216921259-216923918  |
| RGS6    | chr14:72917641-72918770   |
| ACKR3   | chr2:237453109-237458665  |
| F2R     | chr5:75975493-75976414    |
| KPNB1   | chr17:45736794-45738498   |
| KANSL1  | chr17:44096663-44098892   |
| FAM84B  | chr8:126959012-126959513  |

|                |                           |
|----------------|---------------------------|
| LRR8B          | chr1:90071762-90075039    |
| PAFAH2         | chr1:26316761-26317951    |
| VPS45          | chr1:150081980-150083765  |
| ENSG0000023446 | chrX:10079168-10079669    |
| PRKCH          | chr14:62136735-62138823   |
| EMILIN2        | chr18:2959755-2962516     |
| PERP           | chr6:138226202-138226703  |
| CD52           | chr1:26640359-26649415    |
| SERTAD2        | chr2:64953187-64955715    |
| SLC38A1        | chr12:46612282-46614577   |
| EIF4E3         | chr3:71534090-71548628    |
| CXCR4          | chr2:136894357-136895685  |
| NAIF1          | chr9:130782187-130797997  |
| OR4E2          | chr14:23036296-23036797   |
| LRTM1          | chr3:54462879-54463781    |
| MRPS31         | chr13:41351401-41352056   |
| HSD11B1        | chr1:209917955-209934392  |
| PRSS1          | chr7:142490731-142512086  |
| ZCCHC8         | chr12:122936380-122939221 |
| SGPP1          | chr14:64116061-64119973   |
| NCAPH          | chr2:97010757-97011258    |
| NRIP1          | chr21:15961239-15966422   |
| C14orf159      | chr14:91716015-91717882   |
| ENTPD1         | chr10:97595339-97597959   |
| NOD1           | chr7:30360451-30362806    |
| GNPNAT1        | chr14:53206858-53212999   |
| NLRC5          | chr16:57168488-57169670   |
| MICAL2         | chr11:12214700-12230377   |
| SEPT9          | chr17:75662055-75664746   |
| UCP3           | chr11:73706284-73706785   |
| NDC80          | chr18:2632691-2645506     |
| BBS4           | chr15:73031454-73033658   |
| POLR3E         | chr16:22368253-22368754   |
| NIPAL4         | chr5:156997729-156998896  |
| OPRM1          | chr6:154561441-154572436  |
| CCR4           | chr3:33101537-33102038    |
| TRIO           | chr5:14590259-14599435    |
| PPP1R3G        | chr6:5173355-5176598      |
| RBL1           | chr20:35642143-35645654   |
| CDIP1          | chr16:4538439-4539333     |
| DIS3L2         | chr2:233174928-233175839  |
| PRKCH          | chr14:61799211-61801737   |
| NT5M           | chr17:17305800-17310022   |
| ZNF764         | chr16:30563514-30564015   |
| SUPV3L1        | chr10:70963128-70963629   |
| CEP78          | chr9:80815941-80816442    |
| ZNF407         | chr18:72705029-72709181   |
| OR2AG2         | chr11:6763112-6769860     |
| C1QTNF6        | chr22:37566270-37566953   |
| IL1RN          | chr2:113926159-113926660  |
| CLU1           | chr12:92985240-93000594   |
| FIGNL1         | chr7:50342941-50362900    |
| GCC1           | chr7:127054339-127054973  |
| MAP2K2         | chr19:4109114-4109777     |
| CD99           | chrX:2595195-2595696      |
| RAB14          | chr9:123894539-123896353  |

|           |                           |
|-----------|---------------------------|
| LPP       | chr3:187716257-187719873  |
| CD244     | chr1:160764732-160771637  |
| ELL2      | chr5:95204076-95207203    |
| GPR126    | chr6:143176425-143177124  |
| BMP10     | chr2:68991151-68992164    |
| MYOM1     | chr18:3058772-3059273     |
| SOX9      | chr17:70722973-70723474   |
| C14orf159 | chr14:91692704-91693427   |
| WDR43     | chr2:29233765-29235603    |
| NPIP81    | chr16:29020169-29020797   |
| PARP11    | chr12:3979361-3979862     |
| KIAA0232  | chr4:6900194-6902707      |
| QPCT      | chr2:37842878-37843979    |
| SMIM20    | chr4:25939828-25940690    |
| TMSB4X    | chrX:13031697-13032332    |
| SOGA2     | chr18:9082843-9084673     |
| EDAR      | chr2:109646233-109651772  |
| CREG2     | chr2:101977799-101978430  |
| SRBD1     | chr2:45405554-45406055    |
| AMICA1    | chr11:118071015-118105812 |
| FAM65B    | chr6:25033348-25044521    |
| FYB       | chr5:39188764-39189265    |
| IL19      | chr1:206976974-206977631  |
| GRM4      | chr6:33870147-33876929    |
| MTF2      | chr1:93507272-93508960    |
| RPAP3     | chr12:47700588-47701955   |
| PARP8     | chr5:49885070-49891998    |
| MYO1H     | chr12:109873494-109873995 |
| OR4D1     | chr17:56234433-56234934   |
| LTA       | chr6:31539866-31540797    |
| HNF1A     | chr12:121470323-121477632 |
| ATP5O     | chr21:35347901-35349927   |
| PLEK      | chr2:68616021-68616522    |
| SEPT10    | chr2:109964637-109966452  |
| KERA      | chr12:91430612-91431113   |
| ATP5O     | chr21:35319456-35324763   |
| TMEM200B  | chr1:29253778-29254446    |
| BTG1      | chr12:92420381-92432040   |
| ZBED1     | chrX:1775688-1777717      |
| UXS1      | chr2:106709037-106715154  |
| ATXN3L    | chrX:13092201-13115852    |
| PRKCH     | chr14:61796735-61797590   |
| ZBTB20    | chr3:114014964-114015930  |
| C12orf76  | chr12:110516365-110518586 |
| LANCL2    | chr7:55598922-55607522    |
| SEMA7A    | chr15:74687650-74697107   |
| PREX1     | chr20:47336295-47336796   |
| SPAG6     | chr10:22970858-22971359   |
| COG6      | chr13:41057338-41062331   |
| FAM192A   | chr16:57066454-57081705   |
| LEMD1     | chr1:205409695-205410495  |
| FCHSD2    | chr11:72868217-72869496   |
| LY9       | chr1:160805499-160810013  |
| CDC37     | chr19:10519100-10520700   |
| ARHGEF3   | chr3:56832880-56833671    |
| VANGL2    | chr1:160487607-160494741  |



|         |                           |
|---------|---------------------------|
| UBASH3B | chr11:122596830-122600108 |
| KDM3A   | chr2:86810180-86812518    |
| OR4E2   | chr14:23037694-23038479   |
| HIC1    | chr17:2169074-2169575     |
| REL     | chr2:61218873-61221232    |
| IL15    | chr4:143338090-143338719  |
| SLC35G3 | chr17:33538391-33549200   |
| PRKCH   | chr14:61793291-61795749   |
| PRDM8   | chr4:81094209-81094844    |
| ANTXRL  | chr10:47640140-47640775   |
| SV2C    | chr5:75621802-75622702    |
| SARDH   | chr9:136541673-136542174  |
| USP40   | chr2:234330749-234331250  |
| IL16    | chr15:81583807-81586997   |
| TMEM131 | chr2:98333447-98334847    |
| IL10RA  | chr11:117843157-117888557 |
| CYP4F22 | chr19:15624554-15626696   |
| RAB37   | chr17:72737675-72738176   |
| KCNAB1  | chr3:156199087-156204885  |
| CCR4    | chr3:33082420-33106830    |
| DTNB    | chr2:25781088-25781938    |
| VANGL2  | chr1:160490129-160490630  |
| MCM3    | chr6:52169399-52171360    |
| CRELD2  | chr22:50319147-50320049   |
| CD40LG  | chrX:135860321-135864451  |
| VWA8    | chr13:42064994-42069697   |
| AMICA1  | chr11:118086346-118086847 |
| COPRS   | chr17:29821753-29822254   |
| FAM101B | chr17:266073-266704       |
| FAM174A | chr5:100225324-100226967  |
| SLFN14  | chr17:33857247-33871500   |
| MKI67IP | chr2:122455932-122459813  |
| QPCT    | chr2:37826887-37828247    |
| MFAP5   | chr12:8797183-8797684     |
| FKBP5   | chr6:35579219-35579720    |
| COL28A1 | chr7:7296546-7299967      |
| ZNF862  | chr7:149562190-149563385  |
| GLI1    | chr12:57869128-57876120   |
| CNIH3   | chr1:224811481-224811982  |
| PRKCH   | chr14:61918311-61918812   |
| GSG2    | chr17:3666922-3667423     |
| KLHL22  | chr22:20817760-20818999   |
| DHRS2   | chr14:24078372-24081567   |
| LIG3    | chr17:33376821-33380645   |
| TMEM232 | chr5:109389561-109390062  |
| NBPF6   | chr1:109187595-109188237  |
| TOX2    | chr20:42697351-42697852   |
| WASF3   | chr13:27295920-27296421   |
| TBCC    | chr6:42742356-42744208    |
| BTG3    | chr21:19155924-19156717   |
| CCDC41  | chr12:94601724-94602225   |
| ZNF778  | chr16:89550297-89550934   |
| PDE8A   | chr15:85859455-85860223   |
| DPF1    | chr19:38539307-38539962   |
| PLCL2   | chr3:16883801-16884863    |
| ZNF80   | chr3:113932074-113933947  |

|                |                           |
|----------------|---------------------------|
| GLI1           | chr12:57869708-57874867   |
| WISP3          | chr6:112348470-112348971  |
| KPNA2          | chr17:66180308-66180809   |
| IRAK2          | chr3:10282465-10286253    |
| SULT1A4        | chr16:29611331-29612097   |
| MAF            | chr16:78775328-78778182   |
| COTL1          | chr16:84640908-84641619   |
| PLEC           | chr8:145002185-145003845  |
| FANCA          | chr16:89827906-89828407   |
| ARID5B         | chr10:63998238-63998739   |
| GALNT13        | chr2:154999804-155000305  |
| RASGRP1        | chr15:38962988-38963489   |
| ATXN3L         | chrX:13105792-13106705    |
| TAGAP          | chr6:159463139-159465219  |
| DNAH6          | chr2:85064872-85078493    |
| IFI16          | chr1:159035905-159040682  |
| CYTIP          | chr2:158298305-158300545  |
| IQGAP3         | chr1:156494515-156495016  |
| TGFBR3         | chr1:92014195-92014696    |
| AKAP11         | chr13:42965584-42972633   |
| RGS21          | chr1:192486064-192486565  |
| PLBD1          | chr12:14569533-14571583   |
| RNASET2        | chr6:167362904-167364731  |
| SNUPN          | chr15:75896512-75901528   |
| F2R            | chr5:76033283-76034726    |
| SHPRH          | chr6:146187712-146188213  |
| QPCT           | chr2:37826192-37829797    |
| AFAP1          | chr4:7828784-7830898      |
| RTP3           | chr3:46578608-46582562    |
| ZNF438         | chr10:30994309-30994943   |
| RABAC1         | chr19:42390602-42391797   |
| CD84           | chr1:160508130-160513413  |
| COL6A5         | chr3:130183678-130184341  |
| PPP2R2B        | chr5:146173703-146174204  |
| ENSG0000025664 | chr7:42792929-42794131    |
| FGFR10P        | chr6:167454102-167457063  |
| PRMT7          | chr16:68449707-68453773   |
| NRP1           | chr10:33424800-33425458   |
| RNF125         | chr18:29618159-29624355   |
| CILP2          | chr19:19708560-19709264   |
| PRSS1          | chr7:142507272-142507773  |
| PTPRE          | chr10:129894103-129894604 |
| PSME4          | chr2:54221418-54221919    |
| APBB1IP        | chr10:26724566-26732012   |
| THEM4          | chr1:151877519-151878918  |
| P2RY8          | chrX:1581757-1582576      |
| STT3B          | chr3:31267044-31268226    |
| CD84           | chr1:160525293-160552445  |
| LANCL2         | chr7:55600132-55602789    |
| TAGAP          | chr6:159458726-159467254  |
| KCNA3          | chr1:111172870-111192842  |
| ZDHC19         | chr3:195906030-195908480  |
| CAND1          | chr12:68021971-68027093   |
| FYB            | chr5:39192766-39193267    |
| CD2            | chr1:117293188-117316085  |
| LHX2           | chr9:126963640-126966262  |

|            |                           |
|------------|---------------------------|
| KCTD18     | chr2:201248181-201248682  |
| P2RY8      | chrX:1600072-1601051      |
| SEPT2      | chr2:242248743-242249388  |
| DISC1      | chr1:232664947-232665448  |
| USP11      | chrX:47221156-47222272    |
| RNF214     | chr11:117150993-117152238 |
| FIGNL1     | chr7:50351130-50352696    |
| FYN        | chr6:112071789-112076745  |
| SNCA       | chr4:90214292-90215155    |
| CERS4      | chr19:8256936-8261756     |
| CD3E       | chr11:118208937-118210059 |
| SUSD3      | chr9:95825246-95825747    |
| TG         | chr8:133991773-133992516  |
| SLX4       | chr16:3675767-3676268     |
| FAM65B     | chr6:25056040-25057735    |
| CDKL4      | chr2:39353595-39356005    |
| PSEN2      | chr1:227070339-227070975  |
| PAPOLG     | chr2:61046229-61046730    |
| PTPRJ      | chr11:48025676-48028082   |
| RAB37      | chr17:72732404-72742092   |
| TAGAP      | chr6:159461621-159462122  |
| TNFRSF13B  | chr17:16890267-16894099   |
| PTPRK      | chr6:128272832-128273333  |
| IL10RA     | chr11:117840867-117841648 |
| ARHGAP35   | chr19:47470788-47471945   |
| PIK3CG     | chr7:106506997-106507498  |
| PTP4A2     | chr1:32292438-32292939    |
| TIA1       | chr2:70329991-70333689    |
| CDNF       | chr10:14629416-14631042   |
| SNRPD1     | chr18:19262299-19263469   |
| TNFSF18    | chr1:172786752-172790128  |
| NFATC2     | chr20:50021488-50022271   |
| SUCNR1     | chr3:151909609-151924310  |
| GRHL2      | chr8:103064386-103064887  |
| RAB8B      | chr15:63485527-63486245   |
| MYH13      | chr17:10170744-10171245   |
| SOBP       | chr6:108061753-108062987  |
| TAGAP      | chr6:159484365-159484866  |
| MYO1B      | chr2:192070833-192071334  |
| BBC3       | chr19:47679359-47681411   |
| KCNA3      | chr1:111174613-111175114  |
| GMPR       | chr6:16699321-16701278    |
| P2RY10     | chrX:78351674-78352175    |
| AMPH       | chr7:38399373-38399874    |
| FNBP1      | chr9:132650322-132651608  |
| CSGALNACT1 | chr8:19302336-19302837    |
| KIAA1586   | chr6:56803093-56803594    |
| ATXN7      | chr3:63953107-63955317    |
| BTG3       | chr21:19165596-19167125   |
| CAPSL      | chr5:35859343-35859844    |
| FAM84B     | chr8:126648207-126652139  |
| RHOH       | chr4:40309483-40310341    |
| DDIT4      | chr10:74086678-74087179   |
| ITGA6      | chr2:173360212-173361032  |
| MICAL2     | chr11:12244857-12247030   |
| DAB2       | chr5:39775909-39776740    |

|          |                           |
|----------|---------------------------|
| NIPBL    | chr5:37197191-37199020    |
| E2F3     | chr6:20318956-20321183    |
| NRP1     | chr10:33395753-33429250   |
| TPST1    | chr7:65760309-65760958    |
| LBH      | chr2:30555104-30561724    |
| WDR43    | chr2:29237027-29239404    |
| TMEM131  | chr2:98328731-98337931    |
| TBC1D2B  | chr15:78338845-78345380   |
| CCDC66   | chr3:56950039-56952371    |
| LIG3     | chr17:33373478-33374153   |
| LPIN1    | chr2:12637607-12645285    |
| TNFRSF8  | chr1:12147272-12150206    |
| SRSF7    | chr2:38893187-38895506    |
| SPATA13  | chr13:24823698-24830525   |
| PPP1R16B | chr20:37500963-37503575   |
| XPO6     | chr16:28152386-28154206   |
| UBASH3B  | chr11:122611373-122621267 |
| CD200R1L | chr3:112388624-112398119  |
| TMEM66   | chr8:29356670-29357432    |
| PPP1R3G  | chr6:5174537-5175551      |
| MCM3     | chr6:52171951-52173363    |
| SMPD3    | chr16:68390534-68391035   |
| ZBTB46   | chr20:62381022-62383422   |
| FXYD5    | chr19:35696310-35696811   |
| ZC3H8    | chr2:112914158-112914659  |
| SNAI3    | chr16:88746842-88749461   |
| COG6     | chr13:40779782-40781809   |
| MYO1B    | chr2:192065430-192073329  |
| E2F3     | chr6:20367549-20368199    |
| KCTD16   | chr5:143565113-143572110  |
| TBX19    | chr1:168437139-168440735  |
| NANS     | chr9:100866057-100867338  |
| ATP5O    | chr21:35304069-35306039   |
| STIM1    | chr11:3970072-3970573     |
| SUCNR1   | chr3:151957200-151966346  |
| TNIP3    | chr4:122102262-122103737  |
| MAML2    | chr11:95989176-95993871   |
| H3F3C    | chr12:32038448-32054118   |
| FAM65B   | chr6:25027814-25028315    |
| TNFSF18  | chr1:172626785-172633865  |
| ECHDC2   | chr1:53103517-53104018    |
| SPP2     | chr2:235335081-235336717  |
| COLGALT2 | chr1:183925043-183926676  |
| GNA13    | chr17:62965408-62966073   |
| CYTIP    | chr2:158266785-158278917  |
| EML4     | chr2:42524254-42524964    |
| NOL7     | chr6:13687747-13688248    |
| IL10     | chr1:206889632-206890133  |
| C2orf40  | chr2:106776072-106777906  |
| FAHD2B   | chr2:97628414-97628915    |
| C1QTNF6  | chr22:37559569-37560588   |
| CECR1    | chr22:17697120-17697621   |
| MKI67IP  | chr2:122456522-122458761  |
| PCNX     | chr14:71463577-71469265   |
| P4HA2    | chr5:131438081-131440256  |
| PPP3CA   | chr4:101941553-101942999  |

|          |                           |
|----------|---------------------------|
| VPS13B   | chr8:100509977-100513092  |
| DCHS2    | chr4:154860927-154861428  |
| RNASEH2B | chr13:51488536-51489954   |
| CDKL4    | chr2:39353609-39358413    |
| PATL2    | chr15:44975470-44976486   |
| GPR114   | chr16:57626078-57627652   |
| TMEM201  | chr1:9688640-9690647      |
| PRSS1    | chr7:142502051-142503604  |
| RRAS2    | chr11:13943869-13947741   |
| OLIG1    | chr21:34587697-34588198   |
| RPAP3    | chr12:47664503-47665004   |
| SLFN14   | chr17:33849412-33849913   |
| EIF4E3   | chr3:71503771-71505762    |
| VSX1     | chr20:25071908-25072409   |
| PRNP     | chr20:4645257-4647210     |
| ADIPOQ   | chr3:186626931-186627432  |
| CASP3    | chr4:185434290-185438004  |
| RHOH     | chr4:40232853-40233819    |
| ANGPTL2  | chr9:129767260-129767761  |
| MDGA1    | chr6:37483145-37485460    |
| GBF1     | chr10:104059867-104060560 |
| CMC2     | chr16:81029734-81032284   |
| RRAS2    | chr11:13950821-13951499   |
| ESD      | chr13:46867725-46872799   |
| GBP5     | chr1:89736848-89737536    |
| LDLRAP1  | chr1:25887642-25889625    |
| CEACAM21 | chr19:42050144-42065104   |
| RAP1A    | chr1:112133228-112149695  |
| CMTM6    | chr3:32474279-32475384    |
| ZC3H8    | chr2:112945868-112946369  |
| FYB      | chr5:39213446-39213947    |
| SNCA     | chr4:90226529-90227167    |
| PIK3R1   | chr5:67196845-67197346    |
| DAXX     | chr6:33311931-33313351    |
| TMX1     | chr14:51772074-51773513   |
| HECW2    | chr2:197121639-197136983  |
| SLC34A2  | chr4:25860794-25862387    |
| FARS2    | chr6:5830808-5833715      |
| SH3KBP1  | chrX:19816791-19818942    |
| EMILIN2  | chr18:2971100-2972839     |
| FXYD5    | chr19:35693779-35709585   |
| COTL1    | chr16:84547957-84549382   |
| TSGA10   | chr2:99388111-99389937    |
| FAM76B   | chr11:95430645-95434291   |
| ARHGAP35 | chr19:47457133-47459732   |
| CCDC88C  | chr14:91784415-91785044   |
| GAB2     | chr11:77912832-77913465   |
| DOCK9    | chr13:99703885-99704635   |
| ZSCAN10  | chr16:3120078-3131692     |
| THEM4    | chr1:151867606-151872866  |
| RRAS2    | chr11:13944601-13945246   |
| MRPS31   | chr13:41349741-41353708   |
| SGCD     | chr5:156339767-156342020  |
| RRAS2    | chr11:13946289-13946790   |
| CD200R1L | chr3:112389248-112397485  |
| DRAP1    | chr11:65693529-65697384   |

|          |                           |
|----------|---------------------------|
| DOCK3    | chr3:51061236-51064451    |
| TSPAN3   | chr15:77295594-77296608   |
| DHRS12   | chr13:52398786-52400975   |
| C2CD5    | chr12:22548781-22550645   |
| SPAG6    | chr10:22938602-22939103   |
| CAND1    | chr12:67876768-67877690   |
| ADAM12   | chr10:127798899-127800050 |
| MAPK1    | chr22:22120734-22121386   |
| RAB8A    | chr19:16228794-16230348   |
| FILIP1L  | chr3:99418862-99420000    |
| XPO6     | chr16:28198021-28199458   |
| LYRM7    | chr5:130587621-130589312  |
| MAL      | chr2:95740424-95740925    |
| GTDC2    | chr3:43235503-43236004    |
| ACPL2    | chr3:141097344-141100252  |
| UMODL1   | chr21:43609807-43610308   |
| CD2      | chr1:117297509-117298703  |
| RUSC1    | chr1:155435759-155436418  |
| FAM76B   | chr11:95449281-95449782   |
| PMP22    | chr17:14330011-14333866   |
| ZFYVE28  | chr4:2281953-2285001      |
| GBP5     | chr1:89775030-89777658    |
| RHEB     | chr7:151048965-151049466  |
| MYO9B    | chr19:17293056-17296174   |
| MED27    | chr9:134606680-134612970  |
| NAV2     | chr11:20052987-20054032   |
| ANXA4    | chr2:69920694-69921195    |
| UXS1     | chr2:106712177-106713445  |
| SLC9A7   | chrX:46446245-46448133    |
| POLR2E   | chr19:1074182-1076311     |
| DNMT1    | chr19:10252799-10254166   |
| SARDH    | chr9:136547947-136549830  |
| WIPI1    | chr17:66339766-66346288   |
| BANP     | chr16:87989996-87990795   |
| HLA-E    | chr6:30474233-30480285    |
| IFNG     | chr12:68091191-68093726   |
| EPS8L3   | chr1:110343182-110347598  |
| CD180    | chr5:66516633-66519870    |
| PRKCH    | chr14:61807069-61813075   |
| CLIC6    | chr21:36392479-36403492   |
| B4GALNT3 | chr12:672745-673246       |
| NIPBL    | chr5:37197930-37198431    |
| INPP5D   | chr2:233939498-233941501  |
| OR4E2    | chr14:22857423-22858383   |
| CD101    | chr1:117544673-117546146  |
| ARL6IP1  | chr16:18814731-18816483   |
| TMEM66   | chr8:29833040-29833541    |
| ANLN     | chr7:36756513-36767811    |
| DNAJC5B  | chr8:66854100-66869984    |
| MRPL1    | chr4:78774161-78776486    |
| WIPF1    | chr2:175358245-175359565  |
| GPR126   | chr6:143163127-143164593  |
| CD3D     | chr11:118212908-118213779 |
| TMEM167A | chr5:81608519-81609336    |
| POP4     | chr19:30114823-30115324   |
| PARP8    | chr5:49888380-49889314    |

|          |                           |
|----------|---------------------------|
| KLF6     | chr10:3800069-3800951     |
| FANK1    | chr10:127835654-127836343 |
| COG6     | chr13:40962006-40964968   |
| GJA1     | chr6:122204219-122204720  |
| COL6A3   | chr2:238340101-238351843  |
| CECR1    | chr22:17717419-17719055   |
| ZNF236   | chr18:74836671-74837172   |
| SLC52A1  | chr17:4950396-4954089     |
| GAB3     | chrX:153961606-153963263  |
| PRSS1    | chr7:142497341-142498047  |
| PRKAR1B  | chr7:657257-659330        |
| SLC41A2  | chr12:104870155-104882292 |
| SUB1     | chr5:32531419-32532877    |
| CLIC5    | chr6:45891145-45891792    |
| ZNF705B  | chr8:8195478-8197159      |
| CCDC91   | chr12:29256146-29257337   |
| FAM84B   | chr8:126957485-126966056  |
| TMPPE    | chr3:33014976-33015796    |
| ITPRIPL1 | chr2:96980458-96983837    |
| MICAL2   | chr11:12218072-12218573   |
| TNR      | chr1:175177758-175178259  |
| CRB2     | chr9:126084675-126085622  |
| FYB      | chr5:39173027-39220833    |
| SLC16A10 | chr6:111549510-111550011  |
| F2R      | chr5:75973702-75974988    |
| CENPV    | chr17:16170107-16172747   |
| GZMK     | chr5:54332974-54333602    |
| SMAP2    | chr1:40844746-40847547    |
| IFNG     | chr12:68091990-68093152   |
| STMN3    | chr20:62265922-62267267   |
| SPNS3    | chr17:4388865-4390340     |
| SPP2     | chr2:235196873-235205951  |
| ABCC6    | chr16:16126808-16127309   |
| OR4N4    | chr15:22445614-22453931   |
| NCAPH    | chr2:97009422-97010071    |
| PTPRJ    | chr11:48034201-48035374   |
| ANKRD44  | chr2:198170484-198173450  |
| RAB27A   | chr15:55559043-55560006   |
| SP100    | chr2:231305297-231307076  |
| TIAM1    | chr21:32554551-32555052   |
| PRDM11   | chr11:45122473-45125265   |
| PREX1    | chr20:47332942-47333841   |
| RAB7A    | chr3:128508122-128508623  |
| PRKRIP1  | chr7:102056151-102056652  |
| FRMD6    | chr14:52313261-52314177   |
| CDIP1    | chr16:4555584-4556245     |
| PRM1     | chr16:11404509-11405142   |
| TMEM244  | chr6:130068175-130073415  |
| AKTIP    | chr16:53489755-53492488   |
| GTDC1    | chr2:144281607-144284138  |
| RASGRP1  | chr15:38943467-38944498   |
| RPAP3    | chr12:47600678-47601179   |
| FYB      | chr5:39208697-39209198    |
| PTPRJ    | chr11:48039222-48039723   |
| DEF6     | chr6:35276633-35282969    |
| SEPT9    | chr17:75336707-75339513   |

|          |                           |
|----------|---------------------------|
| MSI2     | chr17:55676877-55677638   |
| DPH5     | chr1:101575652-101578984  |
| LRR8C8B  | chr1:90076103-90076604    |
| FYCO1    | chr3:46007553-46008269    |
| PIK3R5   | chr17:8845326-8845827     |
| EFCAB11  | chr14:90184634-90192312   |
| GALNT4   | chr12:89820641-89822471   |
| CLLU1    | chr12:92792911-92793412   |
| DIP2A    | chr21:47978970-47979848   |
| TNRC6B   | chr22:40685578-40686242   |
| PECR     | chr2:216922170-216922892  |
| RFTN1    | chr3:16332275-16332938    |
| UST      | chr6:149475435-149475936  |
| CD2      | chr1:117307482-117307983  |
| CABIN1   | chr22:24548939-24550337   |
| PKDCC    | chr2:42332412-42334799    |
| CISH     | chr3:50611254-50612498    |
| PRKCQ    | chr10:6388162-6393184     |
| GLCC1    | chr7:8164568-8165578      |
| LRFN3    | chr19:36443163-36446756   |
| FUT8     | chr14:66311903-66318377   |
| MVB12B   | chr9:129229031-129238583  |
| CASZ1    | chr1:10569945-10572539    |
| JUN      | chr1:59184027-59185536    |
| OPRM1    | chr6:154570378-154571017  |
| NPIP81   | chr16:28994606-29001991   |
| CDYL     | chr6:4732792-4735719      |
| TNFRSF21 | chr6:47044236-47044737    |
| TMEM66   | chr8:29847294-29849464    |
| LRR8C8C  | chr1:90187177-90187814    |
| CHRM3    | chr1:239882577-239883078  |
| MREG     | chr2:216616377-216616878  |
| ATXN3L   | chrX:13069405-13069906    |
| ARID5A   | chr2:97260776-97261277    |
| CELA3A   | chr1:22345111-22346587    |
| RCAN2    | chr6:46292669-46294259    |
| SECISBP2 | chr9:92023754-92024453    |
| CYP4F22  | chr19:15625494-15626398   |
| PARP8    | chr5:49890167-49890668    |
| ATP1A1   | chr1:117057506-117058627  |
| KPNA2    | chr17:66179057-66179558   |
| NDC1     | chr1:54231054-54233929    |
| HMGB1    | chr13:30944080-30954087   |
| CHN1     | chr2:175703978-175713270  |
| OR4E2    | chr14:23018339-23020276   |
| IL10RA   | chr11:117856418-117860816 |
| CLECL1   | chr12:9825849-9827137     |
| KLRB1    | chr12:9516561-9517202     |
| CLSTN1   | chr1:9710618-9716680      |
| GPR15    | chr3:98282799-98283451    |
| ANKRD44  | chr2:198160690-198161529  |
| RGS3     | chr9:116279360-116280893  |
| CLUAP1   | chr16:3625185-3631587     |
| ZCCHC14  | chr16:87533217-87533718   |
| RCS1     | chr1:167595787-167607716  |
| OPCML    | chr11:132228092-132228593 |



|                |                           |
|----------------|---------------------------|
| STC1           | chr8:23890611-23891112    |
| RHOH           | chr4:40206394-40206895    |
| TWIST1         | chr7:18547862-18549397    |
| FAM84B         | chr8:126933006-126948771  |
| OR4E2          | chr14:23032417-23034145   |
| NFATC2         | chr20:50017142-50017643   |
| GLCCI1         | chr7:8173828-8174329      |
| IVNS1ABP       | chr1:185408248-185409260  |
| GPR126         | chr6:143223440-143224690  |
| DDHD1          | chr14:53573890-53577548   |
| BTG1           | chr12:92424055-92427545   |
| HECW2          | chr2:197041716-197042217  |
| GJA1           | chr6:122078191-122078895  |
| EVI2A          | chr17:29647131-29647632   |
| C12orf76       | chr12:110516863-110518176 |
| WDR82          | chr3:52286885-52288492    |
| SLFN5          | chr17:33546183-33547257   |
| AHR            | chr7:17273361-17275296    |
| EFCAB9         | chr5:171672554-171673055  |
| KHDRBS3        | chr8:136225004-136226187  |
| COMMD7         | chr20:31119677-31132027   |
| SNCA           | chr4:90220340-90220982    |
| ANKRD44        | chr2:198063319-198065309  |
| ARID5B         | chr10:63926624-63927125   |
| XRCC6BP1       | chr12:58931362-58932261   |
| KLF6           | chr10:4011199-4016909     |
| MTFR2          | chr6:136200282-136203366  |
| SPAG9          | chr17:49106289-49108084   |
| KCNA3          | chr1:111190143-111190644  |
| TNFRSF8        | chr1:12127902-12128403    |
| POU6F2         | chr7:39628655-39633451    |
| SPINK2         | chr4:57621696-57625737    |
| ITGB1          | chr10:32701970-32702471   |
| PIK3CG         | chr7:106356176-106361973  |
| C14orf159      | chr14:91707512-91712142   |
| CCR1           | chr3:46148996-46149692    |
| S100PBP        | chr1:33264004-33264505    |
| CD3G           | chr11:118214800-118215472 |
| PPP1R16B       | chr20:37498457-37506686   |
| C1GALT1        | chr7:7196804-7197964      |
| SMOC2          | chr6:169487100-169488224  |
| NTNG1          | chr1:108370910-108371411  |
| CACNA2D3       | chr3:54906997-54917670    |
| TCTN1          | chr12:111043064-111044277 |
| ENSG0000021312 | chr6:153489298-153489953  |
| NBPF6          | chr1:109188834-109190433  |
| ADIPOQ         | chr3:186626121-186628069  |
| DMRTB1         | chr1:54121594-54122909    |
| PPP2R4         | chr9:132032436-132034561  |
| LYRM7          | chr5:130545599-130546100  |
| ELMO1          | chr7:37382052-37382803    |
| VSIG4          | chrX:64916751-64919057    |
| CBR4           | chr4:169614242-169615870  |
| ASB13          | chr10:5631261-5632904     |
| C20orf24       | chr20:35272366-35272867   |
| DEGS2          | chr14:100544724-100546062 |

|          |                           |
|----------|---------------------------|
| BAG3     | chr10:121464307-121464808 |
| OR13H1   | chrX:130946233-130948010  |
| CD6      | chr11:60809176-60809990   |
| DOCK3    | chr3:51062857-51063492    |
| MZT2A    | chr2:132441922-132442423  |
| DAD1     | chr14:22538883-22539384   |
| ATXN3L   | chrX:13141281-13142437    |
| UPP2     | chr2:158756283-158756976  |
| LRR3B    | chr3:27399072-27402772    |
| MAK16    | chr8:33410742-33413599    |
| NAA16    | chr13:41930948-41931449   |
| SIRPG    | chr20:1649320-1658244     |
| LAIR1    | chr19:54899661-54900576   |
| SH3BGR13 | chr1:26613296-26617940    |
| ABI1     | chr10:27025729-27029300   |
| TNFSF18  | chr1:172665293-172675386  |
| PNP      | chr14:20943701-20947258   |
| KCNA3    | chr1:111186002-111186503  |
| FAM84B   | chr8:126962632-126963133  |
| EZR      | chr6:159141943-159142444  |
| PLA2R1   | chr2:160853712-160854764  |
| LPP      | chr3:188848425-188851836  |
| PICALM   | chr11:85827610-85828245   |
| SLAMF1   | chr1:160598771-160599721  |
| SIK3     | chr11:116719957-116727988 |
| CHN1     | chr2:175708206-175709273  |
| IFI16    | chr1:159037143-159037644  |
| CDHR3    | chr7:105489719-105490220  |
| ODC1     | chr2:10470778-10471789    |
| HOXB1    | chr17:46519420-46519921   |
| FCGBP    | chr19:40445123-40451514   |
| HECW2    | chr2:197132863-197133364  |
| FOX1     | chr5:169689249-169689987  |
| HCFC1    | chrX:153232894-153233395  |
| TMEM232  | chr5:109193791-109194292  |
| ZNF407   | chr18:72706877-72707891   |
| ATG5     | chr6:106562519-106563269  |
| CXCR5    | chr11:118746640-118747508 |
| AATF     | chr17:35447119-35447774   |
| FOX1     | chr5:169720515-169721016  |
| NINJ2    | chr12:782405-783276       |
| GBP5     | chr1:89751333-89753516    |
| ACSF3    | chr16:89181874-89182573   |
| BMP10    | chr2:68996618-68999428    |
| GPR183   | chr13:99947982-99948483   |
| HECW2    | chr2:197065316-197065996  |
| A2M      | chr12:9178255-9178756     |
| GIMAP2   | chr7:150364920-150365421  |
| SMYD2    | chr1:214600997-214602001  |
| RPAP3    | chr12:47753871-47755739   |
| SEMA4D   | chr9:92079067-92079568    |
| GNPNAT1  | chr14:53208818-53210023   |
| GET4     | chr7:962161-964712        |
| SUCNR1   | chr3:151914839-151919384  |
| COL15A1  | chr9:101814091-101824288  |
| CFL2     | chr14:35133986-35136967   |

|                |                           |
|----------------|---------------------------|
| COA1           | chr7:43697330-43700542    |
| SNAPC3         | chr9:15299248-15300624    |
| ARID5B         | chr10:64000422-64004302   |
| LYZL2          | chr10:30818019-30818937   |
| ENSG0000017351 | chr15:77471615-77472374   |
| HECW2          | chr2:197124997-197125498  |
| FGD3           | chr9:95725589-95728335    |
| GALNT4         | chr12:89821846-89822347   |
| AHR            | chr7:17678693-17679702    |
| MAP3K5         | chr6:137108592-137110431  |
| GGTLC2         | chr22:23161761-23163389   |
| INTS10         | chr8:19576183-19577614    |
| FER1L6         | chr8:125283267-125284412  |
| STK32C         | chr10:134194534-134196231 |
| QPCT           | chr2:37849120-37855542    |
| OR4E2          | chr14:23022330-23031622   |
| UBE2E3         | chr2:182168705-182179811  |
| PFKFB3         | chr10:6516191-6516692     |
| AIM2           | chr1:159059545-159062808  |
| ZMIZ1          | chr10:81079772-81085129   |
| PICALM         | chr11:85848868-85856844   |
| TBC1D10C       | chr11:67176836-67177464   |
| NRP1           | chr10:33404734-33407827   |
| NAIF1          | chr9:130788582-130789831  |
| MYO1D          | chr17:30828436-30834291   |
| HECW2          | chr2:197074734-197077541  |
| ETS1           | chr11:128478903-128484080 |
| ASAP1          | chr8:130982633-130987614  |
| ATG14          | chr14:55799187-55799962   |
| FAM65B         | chr6:25053538-25055164    |
| HMCN1          | chr1:185536527-185537159  |
| TNNI2          | chr11:1871855-1875813     |
| SYTL3          | chr6:159224801-159225910  |
| APBB1          | chr11:6423458-6423959     |
| ATRN           | chr20:3400077-3402027     |
| CMTM6          | chr3:32465726-32466227    |
| RHOBTB1        | chr10:62578624-62579125   |
| PPP4R1L        | chr20:56545343-56545997   |
| ITIH5          | chr10:7519616-7528686     |
| PEBP1          | chr12:118797200-118797701 |
| KATNAL1        | chr13:30510104-30510605   |
| CTXN3          | chr5:127149206-127150564  |
| VAPA           | chr18:10073558-10074059   |
| PYGB           | chr20:25304360-25304861   |
| DNAJC13        | chr3:132286988-132287489  |
| BMP10          | chr2:68992856-68995722    |
| ADAM10         | chr15:58764786-58765977   |
| CMTM7          | chr3:32499080-32500432    |
| IQGAP2         | chr5:75842283-75844758    |
| RPAP3          | chr12:47609519-47610780   |
| SCAMP1         | chr5:77881596-77883429    |
| RBL1           | chr20:35602837-35603338   |
| TSPAN31        | chr12:58135419-58136487   |
| TARDBP         | chr1:11025837-11026513    |
| SGPP1          | chr14:64226151-64226947   |
| PRUNE2         | chr9:79229732-79230588    |

|                 |                           |
|-----------------|---------------------------|
| NDC80           | chr18:2588682-2590761     |
| CXCL12          | chr10:44311877-44312378   |
| NRIP1           | chr21:16047260-16050891   |
| EFCAB11         | chr14:90146685-90149202   |
| KCNJ1           | chr11:128603322-128604264 |
| TMEM120B        | chr12:122224520-122228880 |
| MKL2            | chr16:14603787-14605242   |
| INMT            | chr7:30765749-30768446    |
| ZFAND5          | chr9:75054554-75062095    |
| PARP11          | chr12:4003870-4008658     |
| C6orf120        | chr6:170019191-170020736  |
| KCTD12          | chr13:76859400-76860223   |
| ENSG00000256641 | chr7:42791698-42795097    |
| FCRLB           | chr1:161708004-161711605  |
| LYZL2           | chr10:30794255-30795116   |
| TNFSF18         | chr1:172632226-172632727  |
| GPR176          | chr15:39916126-39918203   |
| DSC1            | chr18:28778560-28779061   |
| SPATA13         | chr13:24827786-24829054   |
| PLXDC2          | chr10:20912388-20913525   |
| HMGB1           | chr13:30947579-30948080   |
| TBC1D16         | chr17:77969611-77972598   |
| IVNS1ABP        | chr1:185308119-185308620  |
| CD52            | chr1:26644172-26646140    |
| RFTN1           | chr3:16343425-16345331    |
| CCDC88C         | chr14:91880955-91884180   |
| LASP1           | chr17:37246090-37257067   |
| FANK1           | chr10:127930809-127932484 |
| POSTN           | chr13:37798968-37800737   |
| RAD51           | chr15:41036099-41037070   |
| DNAH6           | chr2:85071941-85074628    |
| CD3D            | chr11:118186180-118187431 |
| BMP10           | chr2:68967175-68967841    |
| TBL1X           | chrX:9307448-9311441      |
| DEGS2           | chr14:100533068-100536429 |
| LRRRC8C         | chr1:90182852-90192017    |
| SH3GL2          | chr9:18360171-18360672    |
| RAC2            | chr22:37637005-37640360   |
| ZNF775          | chr7:150125550-150126222  |
| QPCT            | chr2:37809545-37813942    |
| HAVCR2          | chr5:156535129-156535901  |
| TIA1            | chr2:70330605-70332141    |
| SERTAD2         | chr2:64926131-64927874    |
| USP6NL          | chr10:11187250-11187751   |
| RBL1            | chr20:35636634-35637135   |
| TXNL1           | chr18:53536252-53537021   |
| LAMA1           | chr18:7204666-7205461     |
| BMP10           | chr2:68968849-68969350    |
| IRX5            | chr16:55149891-55151236   |
| RALB            | chr2:121044735-121045476  |
| KIAA1279        | chr10:70803731-70806455   |
| CCR1            | chr3:46150305-46151294    |
| TNFSF11         | chr13:43564100-43569134   |
| CECR1           | chr22:17696571-17703054   |
| METTL11B        | chr1:170173600-170174446  |
| CARD11          | chr7:3129182-3136604      |

|           |                           |
|-----------|---------------------------|
| CCR5      | chr3:46408905-46417720    |
| SPSB1     | chr1:9486581-9487482      |
| ZDHH19    | chr3:195910246-195910747  |
| OLFM2     | chr19:9967241-9970172     |
| RAP2B     | chr3:152936518-152942323  |
| TANK      | chr2:162022207-162023500  |
| CLIC6     | chr21:36406263-36427151   |
| MVB12B    | chr9:129230274-129237609  |
| SUCNR1    | chr3:151961600-151962236  |
| IL10RA    | chr11:117877390-117880215 |
| LBH       | chr2:30559575-30560569    |
| NOD1      | chr7:30388158-30388812    |
| HIST3H2BB | chr1:228667152-228667653  |
| KHDRBS3   | chr8:136223642-136224412  |
| TMEM163   | chr2:134988544-134994850  |
| TNFSF14   | chr19:6655110-6655611     |
| USP47     | chr11:12009598-12010245   |
| EHD4      | chr15:42228997-42230052   |
| SNX7      | chr1:98852323-98855930    |
| TNFSF9    | chr19:6576545-6577387     |
| NUP214    | chr9:134143574-134147585  |
| NIN       | chr14:51278927-51280208   |
| MKL1      | chr22:40858473-40859587   |
| XPNPEP2   | chrX:128893356-128894515  |
| NALCN     | chr13:101959056-101959557 |
| CD84      | chr1:160510255-160511141  |
| GTSCR1    | chr18:68003102-68004600   |
| FMN1      | chr15:33148551-33149679   |
| ST6GAL1   | chr3:186759226-186760482  |
| GRIN1     | chr9:140021522-140022215  |
| EFCAB11   | chr14:90188134-90188870   |
| ARHGEF3   | chr3:56813889-56826875    |
| MYO1F     | chr19:8632495-8632996     |
| GIMAP2    | chr7:150361703-150362204  |
| DLEU1     | chr13:50940042-50940543   |
| UBE2E2    | chr3:23803964-23805131    |
| NSMAF     | chr8:59517338-59517839    |
| SEPT9     | chr17:75662622-75663123   |
| FAM65B    | chr6:25035373-25036171    |
| GPR114    | chr16:57643415-57643916   |
| RBKS      | chr2:28276111-28276612    |
| OR4E2     | chr14:23035089-23035590   |
| NALCN     | chr13:101480039-101480540 |
| ZNF281    | chr1:200123645-200124290  |
| FCHSD2    | chr11:72864320-72865168   |
| KLF6      | chr10:3783661-3784642     |
| CELA1     | chr12:51723199-51723700   |
| MREG      | chr2:216581650-216583895  |
| COL5A2    | chr2:189850814-189852096  |
| FAM65B    | chr6:25041084-25042691    |
| HNF1A     | chr12:121471310-121471811 |
| PNP       | chr14:20944626-20946940   |
| CFL2      | chr14:35134138-35136206   |
| STT3B     | chr3:31503169-31503930    |
| FGFR1OP   | chr6:167454517-167455018  |
| RAP1B     | chr12:68871037-68878201   |

|          |                           |
|----------|---------------------------|
| ARHGAP32 | chr11:129118757-129120358 |
| DNAH6    | chr2:85060003-85061161    |
| SLC24A3  | chr20:19792941-19798150   |
| MRPS22   | chr3:139024880-139030320  |
| ATG16L1  | chr2:234176788-234177289  |
| MAP10    | chr1:233057937-233059362  |
| PRKRIP1  | chr7:102066197-102067625  |
| CILP2    | chr19:19709998-19710499   |
| USP6NL   | chr10:11218318-11218819   |
| CHD7     | chr8:61839281-61840828    |
| CLIC6    | chr21:36413341-36415795   |
| SKOR1    | chr15:68172322-68172951   |
| DOCK8    | chr9:444782-449138        |
| RMI1     | chr9:86910074-86913355    |
| SP100    | chr2:231508771-231509596  |
| C7orf72  | chr7:50298662-50311471    |
| SERTAD2  | chr2:64954026-64954527    |
| SRGAP3   | chr3:9322010-9322511      |
| RAB27A   | chr15:55543051-55543832   |
| RDM1     | chr17:34227655-34228156   |
| CD180    | chr5:66511138-66513599    |
| ZC3HAV1  | chr7:138779778-138780811  |
| PTPRC    | chr1:198589387-198590610  |
| POSTN    | chr13:38169996-38173317   |
| RCN2     | chr15:77280445-77281815   |
| NOD1     | chr7:30386904-30387545    |
| CDK14    | chr7:90793834-90794881    |
| COL9A2   | chr1:40807069-40808358    |
| PTTG2    | chr4:38336857-38337358    |
| UMODL1   | chr21:43480044-43485545   |
| CD4      | chr12:6897864-6902251     |
| ELP2     | chr18:33737348-33738193   |
| PPP2R2B  | chr5:146132172-146132673  |
| KCNAB1   | chr3:156207717-156208343  |
| CTIF     | chr18:45963614-45964115   |
| OR4N4    | chr15:22466075-22468518   |
| GIMAP2   | chr7:150357859-150369039  |
| RHOH     | chr4:40256449-40257076    |
| GJA1     | chr6:122147164-122147810  |
| CLSTN1   | chr1:9711563-9714935      |
| ATP8B2   | chr1:154310423-154310924  |
| DEC1     | chr9:118377184-118379334  |
| KCNMB2   | chr3:177837921-177838422  |
| TMEM167A | chr5:81634815-81636753    |
| MUC22    | chr6:31060551-31063270    |
| MRPS22   | chr3:139029359-139029860  |
| MAK16    | chr8:33411009-33413105    |
| CHI3L2   | chr1:111764498-111765595  |
| AQP9     | chr15:58678616-58680103   |
| FYB      | chr5:39187560-39188061    |
| HKDC1    | chr10:70988185-70988866   |
| STXBP6   | chr14:25141121-25145077   |
| SLC12A5  | chr20:44688618-44690216   |
| PHF8     | chrX:53741668-53742169    |
| IL10RA   | chr11:117886249-117887427 |
| LRIF1    | chr1:111416478-111418626  |

|           |                           |
|-----------|---------------------------|
| MTHFD1    | chr14:64911486-64912784   |
| NRP1      | chr10:33398140-33401898   |
| AMOTL1    | chr11:94642642-94643949   |
| ATXN3L    | chrX:13099744-13100840    |
| CHGA      | chr14:93569642-93570143   |
| RASGRP1   | chr15:38988139-38988640   |
| ATG5      | chr6:106603913-106606087  |
| LPP       | chr3:188631495-188636324  |
| TNFRSF11A | chr18:60172981-60173482   |
| CHRNA2    | chr8:27235644-27237360    |
| DNM3      | chr1:172307342-172316216  |
| FAM84B    | chr8:126649332-126650145  |
| C7orf72   | chr7:50305726-50306227    |
| MTBP      | chr8:121741378-121748646  |
| AKAP11    | chr13:42968598-42969452   |
| CYTIP     | chr2:158274258-158276120  |
| TMPRSS13  | chr11:117821473-117822828 |
| NCK2      | chr2:106412885-106416614  |
| CCR4      | chr3:33096006-33096820    |
| UST       | chr6:149461157-149461658  |
| GM2A      | chr5:150593230-150595837  |
| TMEM229B  | chr14:67954483-67955783   |
| FAF2      | chr5:175956786-175957287  |
| EIF2D     | chr1:206729868-206733340  |
| TGFBI     | chr5:135372133-135373344  |
| CERK      | chr22:47144601-47147165   |
| DNM3      | chr1:172148999-172152131  |
| ADRB2     | chr5:148188024-148188525  |
| POSTN     | chr13:37709894-37712375   |
| EPS8L3    | chr1:110344226-110346000  |
| COL1A2    | chr7:94036043-94036544    |
| HGF       | chr7:80791030-80791531    |
| EGFR      | chr7:55376087-55376588    |
| LBH       | chr2:30487147-30490315    |
| PLBD1     | chr12:14538001-14539614   |
| NFATC3    | chr16:68108153-68108654   |
| GIMAP7    | chr7:150253513-150254014  |
| ELP2      | chr18:33732542-33733043   |
| NUP214    | chr9:134126704-134135828  |
| CREB3L1   | chr11:46267045-46271623   |
| SLC38A4   | chr12:47298292-47299145   |
| RIF1      | chr2:152494028-152494529  |
| C10orf128 | chr10:50352395-50354421   |
| GUCY1A3   | chr4:156549148-156550458  |
| FER1L6    | chr8:124849199-124853884  |
| ADAMTS4   | chr1:161151319-161157417  |
| DPH5      | chr1:101578106-101578607  |
| MRPL36    | chr5:1789375-1795898      |
| MESDC2    | chr15:81162705-81163206   |
| GMPR      | chr6:16728355-16729836    |
| BIN2      | chr12:51712654-51713282   |
| FAM9C     | chrX:13018146-13019217    |
| DOCK10    | chr2:225821841-225822958  |
| ENOX1     | chr13:43632047-43632898   |
| HLX       | chr1:221898815-221899873  |
| ZNF638    | chr2:71644627-71645128    |

|          |                           |
|----------|---------------------------|
| POU4F2   | chr4:148281827-148284024  |
| FAM65A   | chr16:67589195-67590936   |
| ATXN3L   | chrX:13103436-13105141    |
| SETD4    | chr21:37012739-37013240   |
| MAF      | chr16:78776092-78776769   |
| F2RL2    | chr5:75955483-75956117    |
| CAND1    | chr12:68023690-68025018   |
| AKAP11   | chr13:42967058-42967698   |
| FOSL2    | chr2:28646671-28647172    |
| GPX2     | chr14:65394992-65395493   |
| BTG1     | chr12:91708645-91713498   |
| DUSP6    | chr12:89044152-89045417   |
| FAM171A1 | chr10:15249981-15251477   |
| ITGB2    | chr21:46333520-46335348   |
| MTAP     | chr9:21680366-21686718    |
| CALHM3   | chr10:105230300-105232013 |
| UST      | chr6:149551358-149557622  |
| DLEU1    | chr13:51465575-51469805   |
| DIO3     | chr14:102188629-102189263 |
| OR2AG2   | chr11:6766539-6768210     |
| PCNX     | chr14:71466197-71467666   |
| TTC28    | chr22:28538810-28540452   |
| COL5A2   | chr2:189856049-189862899  |
| FNBP1    | chr9:132631912-132632413  |
| OR4N4    | chr15:22449733-22450567   |
| FAM3C    | chr7:121184197-121185645  |
| DHX35    | chr20:38515064-38515691   |
| CHD7     | chr8:61838170-61843650    |
| WIPF1    | chr2:175460517-175465032  |
| C7orf72  | chr7:50301934-50302857    |
| SPAG6    | chr10:22934613-22936014   |
| CD6      | chr11:60793386-60794738   |
| DRAP1    | chr11:65694474-65695907   |
| CLSTN1   | chr1:9776922-9778368      |
| ENAH     | chr1:225653958-225656167  |
| TTLL5    | chr14:76343075-76343576   |
| SPINK2   | chr4:57622789-57625576    |
| CSK      | chr15:75074110-75083469   |
| MTSS1    | chr8:125575256-125578424  |
| LRFN3    | chr19:36419209-36422953   |
| CLDN10   | chr13:96161938-96162589   |
| FAM69A   | chr1:93446986-93447487    |
| LRRRC8C  | chr1:90218669-90229664    |
| SP100    | chr2:231506997-231509833  |
| PPP2R4   | chr9:131998492-131998993  |
| USP6NL   | chr10:11204046-11209160   |
| GJA1     | chr6:122158702-122160134  |
| GULP1    | chr2:189387725-189395323  |
| NIPAL4   | chr5:156967355-156969338  |
| UMODL1   | chr21:43605998-43611152   |
| SLA      | chr8:134083038-134084358  |
| EPHB3    | chr3:184503096-184505521  |
| CLIC6    | chr21:36308859-36309360   |
| ENTPD1   | chr10:97620605-97621106   |
| STK10    | chr5:171605036-171607740  |
| SMIM20   | chr4:26290427-26291113    |



|                |                           |
|----------------|---------------------------|
| SUPT7L         | chr2:27908755-27909256    |
| RAP1B          | chr12:68872627-68877033   |
| PITPNC1        | chr17:65436176-65438146   |
| EVI2B          | chr17:29637698-29639301   |
| AK2            | chr1:33445965-33447953    |
| GLCC1          | chr7:8213748-8219150      |
| HMGCR          | chr5:74537588-74538369    |
| HS3ST2         | chr16:23092063-23095046   |
| BCAS3          | chr17:59386382-59387521   |
| SRGAP3         | chr3:9222125-9222626      |
| LPP            | chr3:187717924-187718679  |
| RGS21          | chr1:192519152-192520793  |
| MR1            | chr1:181118982-181119608  |
| NDC80          | chr18:2634922-2638217     |
| PHB            | chr17:47465969-47466470   |
| PICALM         | chr11:85849526-85850027   |
| ZNF691         | chr1:43396614-43399694    |
| UBASH3B        | chr11:122614420-122614921 |
| PARPBP         | chr12:102561196-102561697 |
| MYO18A         | chr17:27465302-27468994   |
| FAM76B         | chr11:94986664-94988917   |
| TGIF2-C20orf24 | chr20:35224095-35224869   |
| MAPKAPK2       | chr1:206939312-206940143  |
| TMSB10         | chr2:85171555-85174890    |
| PTGDR          | chr14:52643158-52643659   |
| RAP1A          | chr1:112146664-112148018  |
| LYRM7          | chr5:130592567-130593418  |
| SLC12A8        | chr3:124826405-124826906  |
| COMMD7         | chr20:31123120-31124122   |
| DOK2           | chr8:21769139-21771197    |
| DNM3           | chr1:172319475-172332300  |
| MTFR2          | chr6:136200531-136202097  |
| SPP2           | chr2:235197830-235201580  |
| MTRNR2L8       | chr11:10480678-10481435   |
| ASAP1          | chr8:130983733-130984234  |
| COL1A2         | chr7:94037658-94043796    |
| TAGAP          | chr6:159482939-159483440  |
| COL8A1         | chr3:99113261-99113762    |
| AKR1B15        | chr7:134301766-134304269  |
| VWA8           | chr13:42066319-42067313   |
| SPNS3          | chr17:4389040-4389685     |
| TMEM244        | chr6:130069193-130072815  |
| MTBP           | chr8:121760349-121761164  |
| NUP214         | chr9:134054193-134055752  |
| TXN2           | chr22:36828075-36829206   |
| CMC2           | chr16:81037482-81038387   |
| PHLDA1         | chr12:76337365-76339791   |
| RNASE1         | chr14:21247851-21253061   |
| KRTDAP         | chr19:35953216-35953717   |
| EFCAB8         | chr20:31553030-31566543   |
| E2F3           | chr6:20320135-20320636    |
| ABI3           | chr17:47285279-47297903   |
| HAS2           | chr8:121868644-121870625  |
| COL5A2         | chr2:189869760-189870261  |
| CERS4          | chr19:8258451-8259943     |
| GALNT10        | chr5:153599282-153602859  |

|          |                           |
|----------|---------------------------|
| DNM3     | chr1:172320726-172321502  |
| GADD45G  | chr9:92150440-92150941    |
| FGF20    | chr8:16219187-16219688    |
| CD44     | chr11:35352208-35352910   |
| ARRB1    | chr11:74986016-74988289   |
| TNFRSF8  | chr1:12148033-12148534    |
| FRMD4B   | chr3:69337524-69338025    |
| SLC35G3  | chr17:33539397-33542138   |
| KCNE4    | chr2:224463022-224463981  |
| MYO1F    | chr19:8631321-8644509     |
| TNFSF4   | chr1:173300240-173300977  |
| MYO9B    | chr19:17294097-17295435   |
| MYO1D    | chr17:30893082-30898662   |
| NUP210   | chr3:13455892-13456735    |
| APOBEC3G | chr22:39485950-39488099   |
| SNCA     | chr4:90237960-90238635    |
| CENPV    | chr17:16171101-16171779   |
| TXN2     | chr22:36801729-36802230   |
| NPY      | chr7:24495595-24496096    |
| TRAF6    | chr11:36432656-36433640   |
| SNTB1    | chr8:121609661-121611305  |
| IRF8     | chr16:85968427-85971417   |
| OR13H1   | chrX:130946836-130947337  |
| SLC9A9   | chr3:142886498-142892124  |
| SETD4    | chr21:36443951-36446436   |
| ITK      | chr5:156679838-156680339  |
| CORO1A   | chr16:30193167-30199673   |
| PPP6R1   | chr19:55764793-55767341   |
| MTPN     | chr7:135563684-135564185  |
| TBL1X    | chrX:9308169-9311316      |
| TRPM8    | chr2:234934191-234935513  |
| REL      | chr2:61188374-61190731    |
| BPGM     | chr7:134345052-134346865  |
| CBR4     | chr4:169522394-169522895  |
| BCL6     | chr3:187494882-187495880  |
| RPAP3    | chr12:47587182-47587683   |
| ATXN3L   | chrX:13108644-13110811    |
| IL6R     | chr1:154434974-154436840  |
| COL5A2   | chr2:190133693-190134194  |
| DNAJB13  | chr11:73691308-73692660   |
| GADL1    | chr3:30695583-30701665    |
| FBXW7    | chr4:153176804-153177305  |
| FBXO31   | chr16:86698141-86698873   |
| GADD45B  | chr19:2620363-2622154     |
| DAPK1    | chr9:89894854-89896324    |
| PPP4R1L  | chr20:56454096-56458027   |
| ZFP64    | chr20:50647963-50648464   |
| TNR      | chr1:175041055-175043057  |
| HMCN1    | chr1:185795187-185795819  |
| TCF4     | chr18:52818244-52818745   |
| STK10    | chr5:171541732-171542233  |
| FANK1    | chr10:127910902-127913512 |
| LPIN1    | chr2:12640610-12643109    |
| PIEZO2   | chr18:11324730-11326125   |
| COL4A4   | chr2:227756431-227756932  |
| ZSCAN10  | chr16:3123625-3127344     |

|          |                           |
|----------|---------------------------|
| PRKCH    | chr14:62125660-62131456   |
| APOD     | chr3:195277943-195279075  |
| DEC1     | chr9:118089948-118090929  |
| KATNAL1  | chr13:30721843-30722344   |
| PTP4A2   | chr1:32354132-32356431    |
| POLR2E   | chr19:1066984-1069594     |
| GNS      | chr12:65062479-65065615   |
| BCL2A1   | chr15:80260773-80261274   |
| ZEB1     | chr10:31549911-31551624   |
| H3F3C    | chr12:32049950-32051066   |
| CYTIP    | chr2:158260402-158260903  |
| PLAU     | chr10:75652751-75653252   |
| GRK5     | chr10:121274499-121280048 |
| SNAP47   | chr1:227952684-227954863  |
| TNFSF4   | chr1:173174287-173174788  |
| SMAP2    | chr1:40849047-40854096    |
| BTG1     | chr12:91642427-91643273   |
| SLC14A2  | chr18:43267038-43267539   |
| FYB      | chr5:39201777-39202851    |
| LUM      | chr12:91501297-91506012   |
| CD48     | chr1:160673198-160684227  |
| GRK5     | chr10:121261927-121262983 |
| TNFSF8   | chr9:117690791-117691438  |
| KHDRBS3  | chr8:136220380-136222406  |
| BTG1     | chr12:91709164-91712418   |
| ESD      | chr13:46870407-46871476   |
| XRCC6BP1 | chr12:58924108-58925936   |
| POLR1A   | chr2:86221332-86221833    |
| FOXO1    | chr13:40526807-40527308   |
| HECW2    | chr2:197104119-197106571  |
| GLCC1    | chr7:8171487-8172527      |
| ITPR1    | chr3:4560807-4561555      |
| RXRA     | chr9:137388497-137389354  |
| COL6A3   | chr2:238340953-238345425  |
| GRIN2B   | chr12:13500519-13501167   |
| LY9      | chr1:160807559-160808214  |
| OLFM2    | chr19:9968456-9968957     |
| WIPI1    | chr17:66342475-66342976   |
| KERA     | chr12:91433164-91433665   |
| UBE3C    | chr7:157094270-157095964  |
| HIC1     | chr17:2162928-2163429     |
| ECHDC2   | chr1:53102274-53102908    |
| MYO1D    | chr17:30829829-30832833   |
| GALM     | chr2:38881488-38881989    |
| UMODL1   | chr21:43536976-43537477   |
| ZBTB46   | chr20:62381934-62383078   |
| ZMIZ1    | chr10:81076835-81078171   |
| STK10    | chr5:171601495-171603247  |
| ZEB1     | chr10:32034113-32035228   |
| FOXQ1    | chr6:1113615-1117208      |
| TSHZ3    | chr19:31868683-31869419   |
| COG6     | chr13:41060348-41060849   |
| ZNF365   | chr10:64393655-64401355   |
| BMP10    | chr2:69001312-69002917    |
| CBL      | chr11:119133841-119134342 |
| TOX      | chr8:59713297-59713978    |

|          |                           |
|----------|---------------------------|
| KCNH5    | chr14:62605118-62606702   |
| IRF6     | chr1:209938298-209949596  |
| GRIA2    | chr4:159041323-159042433  |
| DCHS2    | chr4:154965437-154966636  |
| THEM4    | chr1:151870409-151871339  |
| RBL1     | chr20:35597672-35598173   |
| TRERF1   | chr6:42334521-42336009    |
| COL1A2   | chr7:94033188-94035021    |
| MVB12B   | chr9:129278354-129280561  |
| FARS2    | chr6:5831501-5832405      |
| EDAR     | chr2:109647820-109649354  |
| SNAI3    | chr16:88748158-88749060   |
| HMGB1    | chr13:30950222-30950883   |
| GAK      | chr4:872653-873154        |
| COG6     | chr13:40962540-40963041   |
| COA1     | chr7:43698383-43699581    |
| MYO1B    | chr2:192066270-192068066  |
| SETD4    | chr21:36930408-36938875   |
| BANP     | chr16:88330652-88334320   |
| EPHB3    | chr3:184503053-184505137  |
| SNX13    | chr7:17569315-17576451    |
| PPP2R4   | chr9:132032947-132034209  |
| ZNF705B  | chr8:8190090-8192783      |
| FTCDNL1  | chr2:200674847-200675681  |
| C18orf25 | chr18:43829573-43831219   |
| AMICA1   | chr11:118076689-118077999 |
| WDR1     | chr4:10034662-10035477    |
| DEF6     | chr6:35278323-35280214    |
| STK10    | chr5:171539751-171540252  |
| RPGRIP1L | chr16:53551465-53553732   |
| KLHL6    | chr3:183269676-183274583  |
| SLC25A15 | chr13:41578570-41579071   |
| H3F3C    | chr12:31985341-31986234   |
| GIMAP7   | chr7:150208548-150218722  |
| FOXO3    | chr6:109223413-109224098  |
| FAM84B   | chr8:126942546-126943847  |
| PIEZO1   | chr16:88856370-88857757   |
| M1AP     | chr2:74793231-74807042    |
| SAG      | chr2:234239865-234240366  |
| GRM5     | chr11:88147689-88149288   |
| NR5A2    | chr1:200319922-200324451  |
| HHIPL2   | chr1:222167550-222168493  |
| COL1A2   | chr7:94053938-94055975    |
| FAM192A  | chr16:57073097-57077189   |
| MAPK10   | chr4:86622506-86623007    |
| HECW2    | chr2:197047568-197048069  |
| UBE2E2   | chr3:23817506-23819621    |
| DNM3     | chr1:172376929-172378090  |
| SLC1A3   | chr5:36724881-36725382    |
| ZNF365   | chr10:64144312-64144813   |
| COL1A2   | chr7:94029484-94032561    |
| SP100    | chr2:231521254-231534881  |
| FAM109A  | chr12:111494753-111495604 |
| FBXO32   | chr8:124489270-124489771  |
| ADAMTS20 | chr12:43150066-43151845   |
| TPGS2    | chr18:33888263-33891279   |

|           |                           |
|-----------|---------------------------|
| NCOA7     | chr6:126123668-126124456  |
| GIMAP2    | chr7:150371785-150377138  |
| RDM1      | chr17:34216999-34217648   |
| CASP12    | chr11:104574119-104580050 |
| CBR4      | chr4:169471353-169472056  |
| POSTN     | chr13:37747922-37751456   |
| RPAP3     | chr12:47668883-47673182   |
| SHROOM3   | chr4:77702638-77705501    |
| DNAJC5B   | chr8:66893630-66894131    |
| SMAP2     | chr1:40861982-40862483    |
| PITPNC1   | chr17:65430636-65431137   |
| OPN4      | chr10:88403096-88403740   |
| GRIA2     | chr4:158940902-158942920  |
| VPS13B    | chr8:100511161-100511861  |
| GIMAP2    | chr7:150372122-150376428  |
| COL5A1    | chr9:137700888-137704564  |
| NRP1      | chr10:33595101-33595602   |
| PRKCQ     | chr10:6342085-6342973     |
| RNF125    | chr18:29620393-29620894   |
| NUAK1     | chr12:106451944-106452657 |
| FGGY      | chr1:60162694-60163636    |
| CORO1A    | chr16:30194226-30199186   |
| STK17A    | chr7:43684492-43691849    |
| APOLD1    | chr12:12959588-12962558   |
| RPS6KA2   | chr6:166900491-166903707  |
| UST       | chr6:149350624-149359402  |
| HMBOX1    | chr8:29106953-29108464    |
| NUP93     | chr16:56881996-56885191   |
| BMP7      | chr20:55449599-55451599   |
| RXRA      | chr9:137383598-137384099  |
| LPA       | chr6:160883838-160884339  |
| CMTM7     | chr3:32501009-32502458    |
| PQLC2     | chr1:19802614-19804555    |
| GJA1      | chr6:121870009-121870510  |
| TNFRSF13B | chr17:16891331-16892380   |
| VAV1      | chr19:6798663-6804470     |
| AKR1C4    | chr10:5335533-5336613     |
| TNFSF11   | chr13:43565058-43567211   |
| NRP1      | chr10:33402491-33403612   |
| DNM3      | chr1:172349811-172350469  |
| CLUAP1    | chr16:3626203-3629103     |
| RBM43     | chr2:151465503-151466460  |
| CD84      | chr1:160546790-160548253  |
| POSTN     | chr13:38114749-38115916   |
| CLDN23    | chr8:8654930-8655431      |
| FRMD4A    | chr10:13755110-13755611   |
| TNFRSF10A | chr8:23075553-23078628    |
| FANCA     | chr16:89830658-89831369   |
| BANP      | chr16:88219671-88222259   |
| CRYBA4    | chr22:27620065-27620566   |
| SLFN14    | chr17:33866635-33868835   |
| FXYD5     | chr19:35702353-35705543   |
| CTSD      | chr11:1778768-1780411     |
| SH3YL1    | chr2:176162-176663        |
| PHLDA1    | chr12:76337548-76339065   |
| ATP1A1    | chr1:117045742-117047782  |

|         |                           |
|---------|---------------------------|
| BTG1    | chr12:91718542-91723221   |
| DTNA    | chr18:32609792-32610293   |
| DNM3    | chr1:172309984-172314586  |
| DYNLT1  | chr6:159070544-159071045  |
| FAM210A | chr18:13463779-13465718   |
| MYO1B   | chr2:192348908-192355440  |
| CSF1R   | chr5:149446031-149446841  |
| BTG1    | chr12:92428118-92429798   |
| COMMD7  | chr20:31125183-31128478   |
| CDC14A  | chr1:100866352-100866853  |
| FOXO3   | chr6:109216649-109217299  |
| EYA3    | chr1:28318780-28319420    |
| SETD4   | chr21:36874963-36878687   |
| HIVEP3  | chr1:42268497-42269714    |
| GRK5    | chr10:121275239-121279381 |
| GAS1    | chr9:89019371-89024667    |
| KCNAB1  | chr3:156200711-156202664  |
| GULP1   | chr2:189585883-189586576  |
| JUN     | chr1:59407900-59408799    |
| TRIO    | chr5:14593606-14595485    |
| IL16    | chr15:81587509-81592244   |
| DEDD2   | chr19:42702944-42707084   |
| WISP3   | chr6:112349470-112349971  |
| IL10RA  | chr11:117873107-117874886 |
| CASP3   | chr4:185434616-185436596  |
| SSH2    | chr17:28032471-28034410   |
| DYRK2   | chr12:68375326-68375827   |
| CARD11  | chr7:2913498-2914137      |
| TVP23A  | chr16:10847178-10847880   |
| KLF6    | chr10:4011915-4012416     |
| ZNF689  | chr16:30613307-30613808   |
| TMEM45A | chr3:100289211-100289712  |
| DBX1    | chr11:19744960-19745987   |
| VRK2    | chr2:58334724-58335854    |
| LAMA2   | chr6:129992864-129995422  |
| CD97    | chr19:14466506-14467172   |
| CLIC6   | chr21:36360210-36360711   |
| TLR8    | chrX:12972766-12976504    |
| FUT8    | chr14:65800530-65802403   |
| ANKEF1  | chr20:9969186-9970654     |
| LASP1   | chr17:37288734-37291858   |
| GPR18   | chr13:99880717-99881968   |
| CD84    | chr1:160537286-160538825  |
| DOCK10  | chr2:225811124-225812366  |
| TTLL5   | chr14:76287831-76290529   |
| CHN1    | chr2:175710228-175710875  |
| NANS    | chr9:100864943-100865444  |
| ZNF114  | chr19:48760896-48761942   |
| GLRX5   | chr14:95989640-95991004   |
| COX7C   | chr5:86414044-86419655    |
| PRKCH   | chr14:61804254-61804755   |
| CD180   | chr5:66517833-66518334    |
| ABI3    | chr17:47286804-47289162   |
| PLIN3   | chr19:4914846-4916971     |
| HKDC1   | chr10:70981574-70982908   |
| TMCC2   | chr1:205256535-205257464  |

|          |                          |
|----------|--------------------------|
| TOMM20   | chr1:234910864-234911529 |
| LST1     | chr6:31552912-31556802   |
| RTN4IP1  | chr6:106966700-106968889 |
| PPCDC    | chr15:75422849-75423350  |
| UMODL1   | chr21:43481807-43483394  |
| COL6A3   | chr2:238349311-238350898 |
| FER1L6   | chr8:124850068-124853438 |
| SMAP2    | chr1:40858079-40858719   |
| CLIC6    | chr21:36398534-36400985  |
| NRP1     | chr10:33410981-33411769  |
| FPR2     | chr19:52292857-52293358  |
| CARD11   | chr7:3134221-3135409     |
| WDR75    | chr2:190275839-190278323 |
| OLIG3    | chr6:137957865-137958366 |
| ALOX5AP  | chr13:31313686-31315287  |
| FCGBP    | chr19:40447016-40447783  |
| NCOA7    | chr6:126120050-126120849 |
| STXBP6   | chr14:25143255-25143944  |
| LHX2     | chr9:126978560-126981534 |
| ITGB2    | chr21:46339171-46341609  |
| TMX1     | chr14:52042207-52043204  |
| MID1IP1  | chrX:39631273-39631774   |
| XRCC6BP1 | chr12:58922206-58923568  |
| CEACAM21 | chr19:42054876-42056844  |
| ANKRD11  | chr16:89381457-89384884  |
| ITPRIPL1 | chr2:96981003-96982367   |
| ARHGEF3  | chr3:56815666-56821605   |
| LPP      | chr3:188849388-188851197 |
| KLF6     | chr10:4015074-4016110    |
| ZFP64    | chr20:51109214-51110243  |
| KLF13    | chr15:31555089-31558521  |
| RPS6KA5  | chr14:91143716-91144513  |
| PRDM1    | chr6:106348327-106349228 |
| ATP1B1   | chr1:169013128-169013629 |
| DDHD1    | chr14:53574756-53575619  |
| ME3      | chr11:86431107-86431608  |
| ATF6     | chr1:161921867-161924093 |
| UACA     | chr15:70550812-70551596  |
| RAB27B   | chr18:53166790-53169318  |
| FOXI1    | chr5:169703621-169707635 |
| EFCAB11  | chr14:90147733-90148234  |
| PRKCQ    | chr10:6389510-6390805    |
| NTSR1    | chr20:61369986-61374299  |
| GULP1    | chr2:189391069-189393531 |
| CD274    | chr9:5493891-5494392     |
| ELFN2    | chr22:37702758-37705707  |
| FOXO1    | chr13:40683335-40684448  |
| GADD45G  | chr9:92137281-92138880   |
| AFF3     | chr2:100386373-100386874 |
| RAB37    | chr17:72733141-72735676  |
| MOB1B    | chr4:71813098-71813599   |
| LASP1    | chr17:37236440-37239918  |
| ELL2     | chr5:95206033-95206534   |
| CLIC6    | chr21:36354854-36356333  |
| BANP     | chr16:88331619-88333206  |
| TBC1D29  | chr17:29135523-29137058  |

|           |                           |
|-----------|---------------------------|
| SIK3      | chr11:116722133-116725465 |
| SLC41A2   | chr12:104856743-104857413 |
| ARHGGEF10 | chr8:1969121-1969622      |
| NUP214    | chr9:134112734-134114005  |
| MAML2     | chr11:95947612-95951258   |
| PHB2      | chr12:7059736-7063759     |
| DIRAS2    | chr9:92769617-92770426    |
| DNM3      | chr1:172236426-172237231  |
| SEL1L     | chr14:81930851-81931352   |
| LASP1     | chr17:37248551-37249548   |
| LASP1     | chr17:37250516-37253763   |
| CCR3      | chr3:46339555-46340209    |
| GSTZ1     | chr14:77769373-77770197   |
| NR5A2     | chr1:200321003-200323517  |
| CHST15    | chr10:125823632-125825208 |
| METTL9    | chr16:21656379-21656880   |
| DNMT1     | chr19:10237239-10237969   |
| ZBTB18    | chr1:244482352-244483977  |
| NID1      | chr1:236161734-236163578  |
| GIMAP5    | chr7:150452170-150453930  |
| TMEM26    | chr10:63156164-63159239   |
| QPCT      | chr2:37851038-37853990    |
| SETD4     | chr21:36847647-36849059   |
| PRKCE     | chr2:46264346-46264984    |
| ZNF407    | chr18:72781577-72783598   |
| CLCN1     | chr7:143070590-143073436  |
| RAB14     | chr9:123884120-123884621  |
| TVP23A    | chr16:10842292-10842793   |
| DOCK8     | chr9:447906-448666        |
| NT5M      | chr17:17306684-17308048   |
| FOXI1     | chr5:169702342-169702843  |
| JUN       | chr1:59483864-59487309    |
| C6orf62   | chr6:24741103-24746497    |
| VAPA      | chr18:10101836-10102337   |
| UBASH3B   | chr11:122598129-122598630 |
| FOSL2     | chr2:28446118-28448778    |
| TSGA10    | chr2:99374024-99377468    |
| KCNJ1     | chr11:128597228-128599203 |
| RGS10     | chr10:121065088-121066468 |
| OLIG3     | chr6:137557787-137563597  |
| GIMAP6    | chr7:150263965-150267361  |
| GALNT10   | chr5:153600269-153601875  |
| NUP214    | chr9:134127550-134132517  |
| CARD8     | chr19:48752097-48754091   |
| VWA8      | chr13:42036993-42040214   |
| ZNF532    | chr18:56603899-56604400   |
| CXCR4     | chr2:136995738-136997876  |
| KCNJ1     | chr11:128594963-128596677 |
| TUBD1     | chr17:57829297-57836958   |
| TAGAP     | chr6:159460030-159460531  |
| TMX3      | chr18:66095722-66096223   |
| EFCAB11   | chr14:90186457-90187214   |
| MUCL1     | chr12:55329366-55330071   |
| ESR1      | chr6:152621232-152624712  |
| TVP23A    | chr16:10843422-10844482   |
| CCDC88C   | chr14:91839146-91839776   |



|          |                          |
|----------|--------------------------|
| MAPKAPK2 | chr1:206943174-206944645 |
| DSG1     | chr18:28827388-28828595  |
| PTCD2    | chr5:71768208-71768709   |
| CADPS    | chr3:62587544-62591509   |
| CDK17    | chr12:96893893-96896976  |
| PMEPA1   | chr20:56201855-56205528  |
| SLC1A4   | chr2:65144854-65145355   |
| CLIC5    | chr6:45404087-45405766   |
| ANXA3    | chr4:79582429-79584566   |
| SYF2     | chr1:25348473-25350761   |
| CLDN24   | chr4:184270084-184270967 |
| MICAL2   | chr11:12197519-12198020  |
| ANXA3    | chr4:79575584-79581698   |
| FAM105B  | chr5:14810152-14811186   |
| AMPH     | chr7:38397943-38398838   |
| JPH2     | chr20:42569312-42573204  |
| BCAS1    | chr20:52258467-52260792  |
| HEMK1    | chr3:50627666-50629157   |
| GIMAP8   | chr7:150178290-150182989 |
| MGST2    | chr4:140578301-140580270 |
| TRIM62   | chr1:33564360-33566423   |
| GAPVD1   | chr9:128411965-128414231 |
| ATRN     | chr20:3400661-3401398    |
| DNM3     | chr1:172363257-172364981 |
| USP20    | chr9:132707073-132708980 |
| LAMA2    | chr6:130008264-130008765 |
| GIMAP7   | chr7:150210775-150215789 |
| ZNF705B  | chr8:8200372-8206726     |
| CD83     | chr6:14275982-14278316   |
| MFNG     | chr22:37879739-37882927  |
| SLA      | chr8:134085147-134089582 |
| RAP2B    | chr3:152938773-152940704 |
| RMI1     | chr9:86911454-86911955   |
| UTS2R    | chr17:80356721-80358712  |
| HLA-A    | chr6:29932142-29934362   |
| CBR4     | chr4:169550399-169560534 |
| PIK3CG   | chr7:106357806-106359961 |
| UMODL1   | chr21:43607238-43608758  |
| UST      | chr6:149352499-149354659 |
| GALNT6   | chr12:51787432-51788609  |
| SLAMF7   | chr1:160737529-160738338 |
| XBP1     | chr22:29206942-29207724  |
| DNM3     | chr1:172326748-172330768 |
| RPS6KA2  | chr6:166901204-166902596 |
| RFTN1    | chr3:16353204-16354304   |
| LRR37A3  | chr17:62704380-62705539  |
| SP100    | chr2:231523476-231525458 |
| ARID1A   | chr1:27070030-27071647   |
| SLC22A5  | chr5:131801662-131803042 |
| BRD7     | chr16:50314614-50316189  |
| SERPINB9 | chr6:2857239-2859407     |
| NTSR1    | chr20:61370631-61373226  |
| PMEPA1   | chr20:56202272-56204589  |
| TMCC2    | chr1:205252951-205255498 |
| C6orf62  | chr6:24742423-24744319   |
| RAD51B   | chr14:69245506-69249867  |

JUN  
ESR1

chr1:59485073-59486675  
chr6:152622518-152623786

**Supplementary Table 2-4. SCC-DOWN-H3K27ac**

|          |                           |
|----------|---------------------------|
| PALM     | chr19:708232-710793       |
| DIO3     | chr14:102025515-102026611 |
| ZSCAN18  | chr19:58609118-58610487   |
| STK32A   | chr5:146614123-146614782  |
| C1orf87  | chr1:61508727-61509483    |
| MICALL2  | chr7:1506062-1507057      |
| ATF3     | chr1:212780243-212783293  |
| PALM     | chr19:707261-711910       |
| C1orf87  | chr1:61515633-61517522    |
| SLC25A21 | chr14:37641219-37641987   |
| NTRK2    | chr9:87282833-87287560    |
| KIAA1456 | chr8:12808716-12810028    |
| TMEM242  | chr6:157557065-157558357  |
| SFSWAP   | chr12:131531476-131533762 |
| SNX19    | chr11:130747932-130748433 |
| ZSCAN18  | chr19:58608078-58610893   |
| NLGN1    | chr3:173115182-173116085  |
| C2orf88  | chr2:191044786-191046363  |
| ADORA2B  | chr17:15689240-15690065   |
| INE1     | chrX:47060199-47060700    |
| CNEP1R1  | chr16:49872691-49873192   |
| MPP2     | chr17:41984314-41984815   |
| EBF4     | chr20:2672779-2673280     |
| CLIC6    | chr21:36041566-36044059   |
| AK4      | chr1:65612861-65614983    |
| NTRK2    | chr9:87282403-87288187    |
| GALNT16  | chr14:69726401-69729556   |
| ACADL    | chr2:211089455-211090133  |
| HSPA12A  | chr10:118501615-118502844 |
| ADORA2B  | chr17:15689175-15690371   |
| A4GALT   | chr22:43114858-43117405   |
| ATF3     | chr1:212777596-212783981  |
| VWA2     | chr10:115999168-115999669 |
| FAHD2A   | chr2:96050796-96051423    |
| TSPAN2   | chr1:115825638-115826139  |
| KLF15    | chr3:126074972-126075985  |
| RFX2     | chr19:6108140-6111260     |
| DIO3     | chr14:101999292-102002832 |
| STK32A   | chr5:146613374-146615111  |
| SLC25A21 | chr14:37640830-37642333   |
| MOB2     | chr11:1580088-1580589     |
| CACNB4   | chr2:152954021-152955909  |
| NAA35    | chr9:88419752-88421086    |
| FOS      | chr14:75742267-75746707   |
| HRASLS5  | chr11:63258417-63258918   |
| MET      | chr7:116311745-116312930  |
| ARHGEF26 | chr3:153838744-153840651  |
| SFSWAP   | chr12:131753109-131753610 |
| GFRA1    | chr10:118030073-118033924 |
| KCNK15   | chr20:43374290-43374931   |
| KIAA1456 | chr8:12808274-12810745    |
| KCNK7    | chr11:65373899-65374400   |
| MYOM2    | chr8:1921986-1922907      |
| TMEM55A  | chr8:91996841-91998100    |
| CNTFR    | chr9:34589094-34590706    |

|          |                           |
|----------|---------------------------|
| FAM150B  | chr2:287500-290082        |
| PPARA    | chr22:46422501-46423961   |
| COBL     | chr7:51383596-51385111    |
| EVA1C    | chr21:33782794-33786708   |
| DOC2B    | chr17:29345-31109         |
| PLEKHA1  | chr10:123871601-123874849 |
| COPS8    | chr2:237562939-237563440  |
| GPR84    | chr12:54772184-54773868   |
| RNF180   | chr5:63461508-63462299    |
| TNFRSF6B | chr20:62323261-62324016   |
| LPCAT1   | chr5:1539209-1541447      |
| UAP1     | chr1:162517942-162519332  |
| FOSB     | chr19:45970433-45973963   |
| SMOX     | chr20:4021682-4022394     |
| CCND1    | chr11:69191168-69191669   |
| PM20D2   | chr6:89855280-89857171    |
| SAMD4B   | chr19:39833327-39834715   |
| EVA1C    | chr21:33781776-33788316   |
| MTHFR    | chr1:11846815-11852883    |
| CLIC6    | chr21:36040841-36044634   |
| C12orf44 | chr12:52442584-52452944   |
| ELANE    | chr19:847632-849064       |
| GPR84    | chr12:54768810-54771452   |
| C1orf86  | chr1:2064917-2066869      |
| GNPTG    | chr16:1428687-1429726     |
| ALDH3A2  | chr17:19482632-19483329   |
| BAG5     | chr14:104015399-104019617 |
| C12orf44 | chr12:52429240-52431973   |
| ANGPTL2  | chr9:129873203-129874722  |
| C12orf44 | chr12:52455865-52457011   |
| NFIC     | chr19:3374354-3376331     |
| CKB      | chr14:103985731-103989036 |
| CYB5R3   | chr22:43039289-43046166   |
| TRABD2B  | chr1:48462467-48463423    |
| NLGN1    | chr3:173112820-173113756  |
| SFSWAP   | chr12:131529378-131536009 |
| SBSPON   | chr8:74004677-74005906    |
| RUFY4    | chr2:218843068-218844322  |
| PTMA     | chr2:232467407-232471661  |
| ETNK2    | chr1:204119856-204121760  |
| UBE2Q2   | chr15:76014988-76017117   |
| C12orf44 | chr12:52448335-52448836   |
| MPRIP    | chr17:16958353-16960384   |
| PM20D2   | chr6:89854852-89857665    |
| KLHL25   | chr15:86315394-86316189   |
| C1orf87  | chr1:61508326-61509719    |
| RRP12    | chr10:99160139-99161145   |
| ZNF704   | chr8:81784930-81787165    |
| C12orf44 | chr12:52443355-52445895   |
| FAM184A  | chr6:119399234-119400558  |
| SIK1     | chr21:44845738-44846842   |
| ID4      | chr6:19836829-19839643    |
| MTCH1    | chr6:36964187-36967016    |
| FASTKD3  | chr5:7802312-7802813      |
| USP44    | chr12:95942143-95942785   |
| GPR153   | chr1:6347807-6349048      |

|          |                           |
|----------|---------------------------|
| ZFPM2    | chr8:106329696-106332517  |
| TIMP4    | chr3:12328612-12330661    |
| KDM4B    | chr19:5040794-5042035     |
| KCTD1    | chr18:24235784-24237535   |
| PPP1R35  | chr7:100047969-100048595  |
| TMEM242  | chr6:157555978-157559161  |
| MTCH1    | chr6:36964669-36967556    |
| KCND3    | chr1:112532407-112535206  |
| CDC14B   | chr9:99380084-99382622    |
| PIM3     | chr22:50340866-50351375   |
| FAM150B  | chr2:286811-290447        |
| RRAGD    | chr6:90121169-90123074    |
| DIP2C    | chr10:733628-735598       |
| LIFR     | chr5:38555807-38558012    |
| KCNT2    | chr1:196577149-196578679  |
| NFIB     | chr9:14345627-14353849    |
| TEX261   | chr2:71205525-71206313    |
| TNXB     | chr6:32013958-32015421    |
| KIAA1586 | chr6:56707596-56709058    |
| BCDIN3D  | chr12:50202188-50203847   |
| SYBU     | chr8:110655343-110658195  |
| PRPF18   | chr10:13570195-13570696   |
| VPS8     | chr3:184321647-184322652  |
| NUMBL    | chr19:41192804-41193482   |
| EXPH5    | chr11:108463287-108464478 |
| PDLIM1   | chr10:97173649-97174483   |
| DNAH9    | chr17:11501842-11502343   |
| SOX13    | chr1:204052543-204053857  |
| NRAP     | chr10:115406275-115406776 |
| B4GALT6  | chr18:29303731-29304605   |
| CELF2    | chr10:11059280-11061104   |
| ECHDC3   | chr10:11864929-11866063   |
| CTGF     | chr6:132331969-132332792  |
| NACAD    | chr7:45128231-45128732    |
| ZNRF2    | chr7:30173828-30177090    |
| NAA35    | chr9:88418882-88421755    |
| PLEKHA1  | chr10:123870860-123876482 |
| RNF19A   | chr8:101524951-101525687  |
| ZFPM2    | chr8:106329081-106332784  |
| C4orf6   | chr4:5206860-5207361      |
| RPS6KL1  | chr14:75389344-75389845   |
| PHKG2    | chr16:30750468-30751218   |
| INHBB    | chr2:121101025-121105203  |
| KCNB1    | chr20:48181890-48185277   |
| NXPH3    | chr17:47591411-47594017   |
| HSPA12A  | chr10:118500459-118503081 |
| HFM1     | chr1:91869664-91870691    |
| GSE1     | chr16:85469415-85471290   |
| TXNRD3   | chr3:126373515-126374016  |
| LRRFIP1  | chr2:238535617-238536947  |
| INHBB    | chr2:121100341-121106049  |
| IL17D    | chr13:21277171-21278711   |
| PDLIM1   | chr10:97175147-97175918   |
| AKAP12   | chr6:151560760-151562650  |
| AKT2     | chr19:40847581-40848285   |
| MICALL2  | chr7:1505231-1509462      |

|          |                           |
|----------|---------------------------|
| AGO2     | chr8:141642225-141646535  |
| GSE1     | chr16:85607470-85608631   |
| AOX1     | chr2:201450081-201452608  |
| FAM19A5  | chr22:48885798-48886299   |
| DHRS12   | chr13:52342719-52345371   |
| GFRA1    | chr10:118029350-118034722 |
| DIO3     | chr14:101997409-102003199 |
| FAHD2A   | chr2:96012713-96013214    |
| TNXB     | chr6:32074680-32082527    |
| KIAA1244 | chr6:138482418-138482919  |
| LRRC32   | chr11:76463179-76464525   |
| ANKRD1   | chr10:92921739-92923944   |
| ARHGEF16 | chr1:3432579-3434432      |
| GAA      | chr17:78044533-78045726   |
| MAP1LC3A | chr20:33145915-33148115   |
| SBNO2    | chr19:1150582-1157092     |
| LYL1     | chr19:13179352-13182337   |
| GET4     | chr7:906116-908025        |
| SPR      | chr2:73114504-73115005    |
| ATOH8    | chr2:85980630-85982911    |
| NTN4     | chr12:96183417-96185521   |
| FAM189A2 | chr9:71939175-71940311    |
| MISP     | chr19:718241-719918       |
| GFPT2    | chr5:179778732-179780381  |
| TET1     | chr10:70319928-70321078   |
| STXBP5   | chr6:147829163-147829664  |
| FSTL3    | chr19:675163-681208       |
| TRPC1    | chr3:142442721-142443862  |
| CORO2B   | chr15:68876944-68877597   |
| SOX10    | chr22:38378955-38380851   |
| SLC25A4  | chr4:186063900-186064713  |
| EGR1     | chr5:137802986-137803650  |
| MEDAG    | chr13:31479792-31482715   |
| CREB5    | chr7:28447300-28450741    |
| CORO2B   | chr15:68870683-68872541   |
| C11orf44 | chr11:130479170-130480391 |
| SLC9A8   | chr20:48363745-48365168   |
| MAGI2    | chr7:79081251-79084070    |
| SCARA5   | chr8:27849778-27850279    |
| ADORA2B  | chr17:15686072-15686573   |
| ACADL    | chr2:211089156-211090713  |
| SPINK8   | chr3:48466490-48466991    |
| LIFR     | chr5:38554652-38558266    |
| ETS2     | chr21:40278330-40280018   |
| CACNB4   | chr2:152953496-152956570  |
| SEPN1    | chr1:26131314-26131961    |
| TNK1     | chr17:7283599-7285066     |
| MAPK4    | chr18:48085850-48086351   |
| TNXB     | chr6:32055130-32056357    |
| SLC39A14 | chr8:22224522-22225891    |
| CYB5R3   | chr22:43087468-43088774   |
| LY6K     | chr8:143781018-143782506  |
| ZNF469   | chr16:88119974-88124377   |
| CABLES1  | chr18:20714717-20717973   |
| ACCSL    | chr11:43963597-43965719   |
| DNAJC6   | chr1:65612234-65617601    |

|           |                           |
|-----------|---------------------------|
| TCEAL3    | chrX:102862141-102864238  |
| PRIMA1    | chr14:94254479-94255470   |
| RBM24     | chr6:17280880-17282537    |
| SYBU      | chr8:110654581-110658793  |
| GNA15     | chr19:3093729-3100980     |
| ZNF395    | chr8:28226738-28227467    |
| SHC2      | chr19:460028-460660       |
| SRCIN1    | chr17:36849552-36850179   |
| RIPPLY3   | chr21:38352773-38353439   |
| AKR1E2    | chr10:3954108-3954739     |
| HNRNPUL1  | chr19:41727677-41728358   |
| ARHGEF16  | chr1:3418740-3419241      |
| KIAA1324L | chr7:86688337-86688964    |
| BACH2     | chr6:91004869-91007405    |
| CRHR2     | chr7:30736778-30737440    |
| DNAJB2    | chr2:220146395-220146896  |
| CPN2      | chr3:193987842-193992107  |
| PTPRS     | chr19:5291567-5293769     |
| EPPK1     | chr8:144952754-144953255  |
| SLITRK2   | chrX:144899771-144900272  |
| C12orf44  | chr12:52457643-52458841   |
| OR10H5    | chr19:15890289-15890790   |
| TMEM72    | chr10:45070872-45071373   |
| ZFYVE21   | chr14:104189371-104190717 |
| SMAD2     | chr18:45554194-45555102   |
| TUB       | chr11:8083610-8084697     |
| PDLIM3    | chr4:186455928-186457109  |
| RELN      | chr7:103630282-103630783  |
| MTM1      | chrX:149530711-149535820  |
| EDEM3     | chr1:184598696-184599197  |
| RHEB      | chr7:151156952-151157986  |
| GNAL      | chr18:11688822-11690169   |
| RAI1      | chr17:17600021-17600522   |
| TSHZ3     | chr19:32619263-32619902   |
| RCAN3     | chr1:24763901-24764928    |
| ARHGAP39  | chr8:145925263-145926011  |
| MISP      | chr19:717795-721768       |
| ENTPD2    | chr9:139948447-139950467  |
| EPS15L1   | chr19:16507662-16513215   |
| INSR      | chr19:7293189-7295096     |
| CACNB2    | chr10:18429840-18430341   |
| DBI       | chr2:120063360-120064727  |
| LRP3      | chr19:33685790-33686447   |
| TMEM120B  | chr12:122070725-122071385 |
| ZBTB2     | chr6:151646703-151647204  |
| ZFYVE27   | chr10:99477337-99478405   |
| TAB2      | chr6:149210545-149211046  |
| AGAP1     | chr2:236578080-236580610  |
| RRAGD     | chr6:90119790-90123329    |
| TLE2      | chr19:3027727-3029223     |
| ROBO2     | chr3:76359571-76361644    |
| NTN1      | chr17:9141971-9145717     |
| BCR       | chr22:23597826-23600640   |
| TEF       | chr22:41763175-41764974   |
| CYP4B1    | chr1:47271382-47273540    |
| KCND3     | chr1:112531399-112535481  |

|                |                           |
|----------------|---------------------------|
| ADAMTS17       | chr15:100881777-100882278 |
| B9D1           | chr17:19204903-19205530   |
| MARK2          | chr11:63530324-63530825   |
| CCDC39         | chr3:180587633-180588468  |
| AQP7           | chr9:33349757-33350258    |
| PKNOX2         | chr11:125034838-125035497 |
| KLF14          | chr7:130969153-130971115  |
| ARHGAP23       | chr17:36618585-36627032   |
| CGNL1          | chr15:57668286-57670338   |
| ID4            | chr6:19836295-19841485    |
| PHLPP2         | chr16:71756732-71758108   |
| SLC7A11        | chr4:139903378-139904013  |
| LYL1           | chr19:13186243-13191224   |
| NTN3           | chr16:2517626-2518641     |
| MTSS1L         | chr16:70714166-70716712   |
| PPP6R3         | chr11:68080112-68082868   |
| GPATCH2L       | chr14:76454769-76455270   |
| SORL1          | chr11:121611635-121613335 |
| TESK1          | chr9:35563613-35564114    |
| DMRTA1         | chr9:22447265-22447959    |
| GPRASP2        | chrX:101967285-101968337  |
| CASZ1          | chr1:10700568-10701627    |
| MEDAG          | chr13:31478893-31483707   |
| NFIB           | chr9:14339803-14354451    |
| GRIK3          | chr1:37920257-37921500    |
| GALNT16        | chr14:69725918-69732625   |
| USP44          | chr12:95941403-95943242   |
| C2CD4A         | chr15:62360449-62361078   |
| PRRG3          | chrX:150863626-150864127  |
| OPA3           | chr19:46050565-46051448   |
| AGO2           | chr8:141639397-141641296  |
| TLE2           | chr19:3047034-3048326     |
| SNED1          | chr2:241930261-241939352  |
| SUSD2          | chr22:24447475-24448989   |
| SOD3           | chr4:24913208-24915188    |
| ENSG0000022632 | chr2:241855368-241858770  |
| TSPYL5         | chr8:98289554-98290181    |
| C2orf88        | chr2:191043735-191048814  |
| PKP2           | chr12:33049296-33050250   |
| ZNRF2          | chr7:30179322-30179823    |
| FZR1           | chr19:3535995-3538018     |
| MTM1           | chrX:149530465-149536120  |
| SCRIB          | chr8:144904579-144907031  |
| MTUS1          | chr8:17657165-17661197    |
| C11orf44       | chr11:130476305-130477000 |
| VWA2           | chr10:115998781-116000661 |
| BLM            | chr15:91175794-91176295   |
| DLL1           | chr6:170495008-170495642  |
| A4GALT         | chr22:43111929-43117933   |
| OTX1           | chr2:63286686-63287325    |
| CNEP1R1        | chr16:49892348-49893749   |
| CHCHD2         | chr7:56183709-56184210    |
| SNED1          | chr2:241929239-241929740  |
| METRNL         | chr17:81064325-81065313   |
| OPLAH          | chr8:145115188-145116389  |
| MCF2L          | chr13:113597279-113598337 |



|          |                           |
|----------|---------------------------|
| IGFBP6   | chr12:53460102-53460603   |
| SOX10    | chr22:38377512-38378013   |
| SYT17    | chr16:19179346-19180176   |
| PBK      | chr8:27795049-27795550    |
| EMX2     | chr10:119296254-119297928 |
| TNXB     | chr6:32049262-32050772    |
| PTPRS    | chr19:5288180-5294551     |
| GNAL     | chr18:11688809-11690508   |
| DEF8     | chr16:90015512-90016013   |
| HAAO     | chr2:43258847-43260971    |
| GSE1     | chr16:85469118-85471765   |
| IRX4     | chr5:2739110-2741457      |
| RPLP0    | chr12:120662325-120664173 |
| C1orf87  | chr1:61514262-61524636    |
| DYNC111  | chr7:95401660-95402480    |
| POLD4    | chr11:67133862-67134803   |
| IRX1     | chr5:3602277-3602778      |
| LIFR     | chr5:38448708-38449336    |
| ZNF669   | chr1:247274400-247275651  |
| PPP6R3   | chr11:68167306-68167807   |
| KCNMA1   | chr10:79631179-79634225   |
| DPM2     | chr9:130712127-130713567  |
| C12orf44 | chr12:52424888-52441653   |
| TRABD2B  | chr1:48461015-48463728    |
| PLEKHH1  | chr14:67999476-68000805   |
| CBX4     | chr17:77924929-77925430   |
| SORL1    | chr11:121611260-121614301 |
| EML4     | chr2:42274329-42279172    |
| TNRC6C   | chr17:75859763-75861799   |
| DUSP10   | chr1:221785500-221786001  |
| ZNF711   | chrX:84499180-84499681    |
| KCTD1    | chr18:24235204-24237921   |
| UBTD2    | chr5:171862874-171865462  |
| TLE2     | chr19:3055217-3058250     |
| ACAT1    | chr11:107985590-107986397 |
| SHF      | chr15:45477537-45480871   |
| DDX25    | chr11:125820339-125820840 |
| LMO2     | chr11:34035439-34036071   |
| DAPK2    | chr15:64338150-64338651   |
| SNED1    | chr2:241926191-241928420  |
| FOXO6    | chr1:41846177-41849194    |
| JHDM1D   | chr7:140062454-140062955  |
| ITPR3    | chr6:33595793-33596294    |
| MYOM2    | chr8:1920934-1923428      |
| FAM184A  | chr6:119416858-119417359  |
| DIP2C    | chr10:733346-737090       |
| ACTL8    | chr1:17899686-17900366    |
| ALDH3A2  | chr17:19482165-19484146   |
| HLF      | chr17:53342369-53344411   |
| TUB      | chr11:8039715-8041984     |
| URAHP    | chr16:90113606-90114107   |
| SLC16A3  | chr17:80061211-80062905   |
| MPV17L   | chr16:15489396-15490447   |
| MNT      | chr17:2273206-2273707     |
| GAS6     | chr13:114739968-114741357 |
| TRMT61A  | chr14:104005072-104005573 |

|          |                           |
|----------|---------------------------|
| EMID1    | chr22:29602042-29602713   |
| KRTCAP3  | chr2:27665104-27665989    |
| CNEP1R1  | chr16:49862462-49863099   |
| SBNO2    | chr19:1143546-1158955     |
| ADRB1    | chr10:115802950-115803581 |
| KLC1     | chr14:104047912-104048413 |
| EVA1C    | chr21:33822617-33824514   |
| PLXNA1   | chr3:126710902-126711403  |
| CAMK2N1  | chr1:20810483-20814050    |
| PCGF2    | chr17:36897960-36899099   |
| AKAP12   | chr6:151560464-151562857  |
| GPR133   | chr12:131437907-131440096 |
| FAM189A2 | chr9:71939266-71941455    |
| SIK1     | chr21:44807037-44807538   |
| POLDIP3  | chr22:43033018-43033519   |
| GNPTG    | chr16:1427070-1430762     |
| NCOR2    | chr12:124888181-124888878 |
| ARHGEF26 | chr3:153838317-153842051  |
| CDC14B   | chr9:99378377-99382672    |
| TRPC1    | chr3:142442546-142444484  |
| RNF180   | chr5:63460770-63462708    |
| ZG16B    | chr16:2879714-2880681     |
| PPP1R12C | chr19:55622470-55626452   |
| NTN4     | chr12:96182589-96185883   |
| SLC6A8   | chrX:152965678-152966179  |
| AGRN     | chr1:960036-961065        |
| AGPAT3   | chr21:45344960-45345461   |
| C19orf26 | chr19:1239164-1240992     |
| PITPNM2  | chr12:123627264-123628636 |
| IRX1     | chr5:3594519-3599759      |
| OR10H5   | chr19:15891478-15891979   |
| ESCO2    | chr8:27559055-27561227    |
| VAMP3    | chr1:7765390-7765891      |
| PLEKHG4  | chr16:67334984-67336200   |
| MRPS23   | chr17:56012634-56013957   |
| MT1M     | chr16:56664812-56668095   |
| GPR3     | chr1:27740769-27741270    |
| CAND2    | chr3:12837511-12839162    |
| MT1M     | chr16:56665559-56667315   |
| SBSPON   | chr8:74004016-74006259    |
| SNX25    | chr4:186130418-186132001  |
| ANGPTL2  | chr9:129851205-129853258  |
| SNTG2    | chr2:945843-947213        |
| TGFBR1   | chr9:101727948-101728449  |
| GCKR     | chr2:27717406-27718632    |
| GNA15    | chr19:3092948-3101962     |
| HFM1     | chr1:91869242-91870919    |
| HABP2    | chr10:114765168-114765669 |
| TRAF3IP1 | chr2:239229059-239229967  |
| CDH22    | chr20:44977636-44979074   |
| GPR37L1  | chr1:202100242-202102782  |
| RASSF9   | chr12:86105294-86105975   |
| KCNT2    | chr1:196576714-196579600  |
| TPT1     | chr13:45953874-45954549   |
| ACPL2    | chr3:140834938-140835439  |
| ODC1     | chr2:10594224-10594725    |

|          |                           |
|----------|---------------------------|
| WASF2    | chr1:27912786-27913287    |
| PDLIM3   | chr4:186455587-186457803  |
| TNXB     | chr6:32038249-32038750    |
| CCT8L2   | chr22:17082081-17083761   |
| EPB41L3  | chr18:5628491-5629159     |
| VASP     | chr19:46032028-46032529   |
| ISM1     | chr20:13201102-13203138   |
| EDNRB    | chr13:78492228-78494270   |
| ST6GAL1  | chr3:186665797-186666559  |
| IL17RD   | chr3:57197984-57199112    |
| SYTL4    | chrX:99986622-99987123    |
| COL5A1   | chr9:137230827-137231654  |
| KCNJ12   | chr17:21260651-21261152   |
| TMEM51   | chr1:15239479-15241088    |
| LCAT     | chr16:67977598-67979257   |
| GPR153   | chr1:6351266-6352674      |
| FN3K     | chr17:80693052-80694245   |
| PET112   | chr4:152579808-152580465  |
| EFEMP1   | chr2:56150173-56151037    |
| LGALS9   | chr17:25866907-25868761   |
| C12orf44 | chr12:52453043-52459500   |
| MACROD2  | chr20:13976021-13976731   |
| F7       | chr13:113644555-113653438 |
| MPO      | chr17:56401777-56402551   |
| GJC2     | chr1:228335945-228339572  |
| SAMD4A   | chr14:55150146-55154358   |
| MATN1    | chr1:30663301-30664372    |
| ANKS1B   | chr12:100377905-100379231 |
| LIFR     | chr5:38465607-38469717    |
| CDO1     | chr5:115152160-115153037  |
| C1QTNF1  | chr17:77015877-77017307   |
| SMOC2    | chr6:168840932-168842991  |
| ZNF429   | chr19:21769046-21769547   |
| ECHDC3   | chr10:11911759-11912487   |
| EPS15L1  | chr19:16504666-16518313   |
| ANLN     | chr7:36405924-36407637    |
| DIO3     | chr14:102022374-102027010 |
| GFPT2    | chr5:179778332-179781518  |
| CHMP6    | chr17:78932683-78934287   |
| PAPOLB   | chr7:4921314-4923354      |
| CASZ1    | chr1:10745676-10746520    |
| PRKAA2   | chr1:57110638-57111948    |
| TPT1     | chr13:45955192-45956595   |
| ARFGAP3  | chr22:43304137-43304638   |
| GMPR     | chr6:16239176-16240336    |
| PLCE1    | chr10:95753646-95754147   |
| TMEM184B | chr22:38643018-38643519   |
| ZNF704   | chr8:81784605-81788779    |
| ITGB1BP1 | chr2:9532475-9533588      |
| C1orf87  | chr1:61519137-61520656    |
| CHN2     | chr7:28995158-28996600    |
| MRAP2    | chr6:84743679-84744180    |
| PTGIS    | chr20:48202887-48203388   |
| RPUSD2   | chr15:40803501-40804311   |
| B4GALT6  | chr18:29264321-29265936   |
| SNED1    | chr2:241924734-241942409  |

|           |                           |
|-----------|---------------------------|
| RBP7      | chr1:10057336-10058283    |
| NXPB3     | chr17:47590277-47594701   |
| SLC16A8   | chr22:38494792-38495293   |
| RREB1     | chr6:7172976-7174056      |
| POLR3D    | chr8:22084936-22085784    |
| LONRF3    | chrX:118107966-118111119  |
| GPRASP2   | chrX:101967070-101968763  |
| PAPPA-AS1 | chr9:119424504-119426005  |
| GAL       | chr11:68452161-68452662   |
| SNED1     | chr2:241907682-241908352  |
| GPR133    | chr12:131404347-131406170 |
| TP53TG3B  | chr16:33293899-33294656   |
| GTF2IRD2  | chr7:74291048-74291549    |
| DHRS12    | chr13:52342267-52347312   |
| RPS6KL1   | chr14:75384063-75384898   |
| C1orf86   | chr1:2063504-2068696      |
| FGFR1     | chr8:38613841-38615540    |
| MYH10     | chr17:8577867-8578368     |
| FAM114A2  | chr5:153380754-153381255  |
| ISX       | chr22:34535561-34536062   |
| CROCC     | chr1:17252057-17252823    |
| ADCY2     | chr5:7394101-7397388      |
| KAZN      | chr1:14925527-14926028    |
| C9orf47   | chr9:91148766-91149555    |
| FAM3B     | chr21:42688382-42688883   |
| MAPK4     | chr18:48085530-48087629   |
| MFAP2     | chr1:17302762-17303263    |
| LTBP4     | chr19:41105701-41106337   |
| ALDH1L1   | chr3:126073282-126076990  |
| TLE2      | chr19:3027333-3029965     |
| ESCO2     | chr8:27559148-27561227    |
| DPM2      | chr9:130707757-130708501  |
| ERVFRD-1  | chr6:11213561-11215297    |
| C12orf44  | chr12:52450031-52450532   |
| CHRM1     | chr11:62688248-62689432   |
| UAP1      | chr1:162524452-162524953  |
| B9D1      | chr17:19244980-19246059   |
| NCOR2     | chr12:124852879-124856661 |
| CAMK2N1   | chr1:20809838-20814028    |
| EPN2      | chr17:19174027-19174528   |
| ZCCHC9    | chr5:80530555-80531056    |
| GGCT      | chr7:30595851-30596690    |
| BOK       | chr2:242503649-242504150  |
| GPT       | chr8:145725947-145730000  |
| B9D1      | chr17:19216139-19216640   |
| CNTFR     | chr9:34588858-34595043    |
| TCF7L1    | chr2:85359895-85362927    |
| COBL      | chr7:51381641-51385971    |
| TLE3      | chr15:70381112-70381613   |
| COPS8     | chr2:237795340-237795841  |
| GPRC5A    | chr12:13043725-13045387   |
| PHF19     | chr9:123656388-123657506  |
| MTMR7     | chr8:17354477-17356857    |
| MEGF6     | chr1:3454836-3457474      |
| NTHL1     | chr16:2171265-2173482     |
| TC2N      | chr14:92350380-92352806   |

|          |                           |
|----------|---------------------------|
| NLGN1    | chr3:173112510-173117496  |
| BCR      | chr22:23597410-23601555   |
| B4GALT6  | chr18:29303331-29305041   |
| TNRC6C   | chr17:75859128-75863055   |
| ZMYND11  | chr10:353421-354123       |
| TNP1     | chr2:217850623-217851907  |
| EFNA5    | chr5:106930097-106930598  |
| NPY5R    | chr4:164264588-164265806  |
| ZNF704   | chr8:81610219-81610846    |
| FAM189A2 | chr9:71962067-71962568    |
| TRAPPC10 | chr21:45348046-45350086   |
| PDK4     | chr7:95178449-95180817    |
| WDR34    | chr9:131390263-131391482  |
| ADCY5    | chr3:123167187-123169187  |
| FGF14    | chr13:103051808-103053452 |
| METRNL   | chr17:81062300-81063287   |
| OPTC     | chr1:203447972-203448655  |
| FAM20C   | chr7:228178-232590        |
| E2F8     | chr11:19585619-19586705   |
| RPL26L1  | chr5:172328719-172329753  |
| HLF      | chr17:53342118-53345641   |
| CYP4V2   | chr4:187065989-187066939  |
| OPLAH    | chr8:145117633-145119478  |
| TNXB     | chr6:32013633-32019002    |
| PTPRS    | chr19:5308471-5309385     |
| KAZN     | chr1:14924483-14926274    |
| HDAC4    | chr2:240628705-240629422  |
| ZNF362   | chr1:33733821-33735645    |
| KCNMA1   | chr10:79625144-79625645   |
| PGPEP1L  | chr15:99498734-99499235   |
| CYP4B1   | chr1:47214740-47218317    |
| OR10H5   | chr19:15889922-15892320   |
| PAPOLB   | chr7:4920948-4923706      |
| TC2N     | chr14:92365557-92366058   |
| CPEB1    | chr15:83315921-83316981   |
| PLXNA1   | chr3:126546805-126547525  |
| SOX9     | chr17:70111477-70116580   |
| CRTC1    | chr19:18769025-18771899   |
| ZDHHC11B | chr5:784311-785497        |
| NR2F1    | chr5:92956646-92957508    |
| TMEM120B | chr12:122116829-122117478 |
| DYNC111  | chr7:95401422-95402696    |
| FOXO6    | chr1:41845046-41849571    |
| AP5Z1    | chr7:4742259-4743342      |
| INPP5A   | chr10:134227374-134227875 |
| RBM24    | chr6:17280381-17283087    |
| KCTD14   | chr11:77733478-77734639   |
| RPS6KA6  | chrX:83442012-83443689    |
| NRBP2    | chr8:144951172-144951824  |
| IRS2     | chr13:110874012-110874641 |
| EXTL1    | chr1:26351293-26351794    |
| GSE1     | chr16:85406576-85407077   |
| EPB41L3  | chr18:5628058-5631063     |
| ATAD2B   | chr2:23608752-23609253    |
| CRIP2    | chr14:105933388-105935682 |
| SIPA1L2  | chr1:232315729-232316419  |

|           |                           |
|-----------|---------------------------|
| SERP2     | chr13:44792622-44794031   |
| KDM4B     | chr19:5059809-5060310     |
| GALNT16   | chr14:69753617-69754118   |
| ATG10     | chr5:81152957-81153753    |
| EGFLAM    | chr5:38416363-38417700    |
| NPHS2     | chr1:179555353-179555989  |
| CASZ1     | chr1:10726299-10726800    |
| C10orf137 | chr10:126840151-126842098 |
| ARHGEF16  | chr1:3112597-3113098      |
| GTF2IRD2  | chr7:74290739-74291526    |
| IRF2BP2   | chr1:234952782-234953919  |
| SEMA3G    | chr3:52480145-52480646    |
| CCT8L2    | chr22:17081603-17084719   |
| SLC22A1   | chr6:160461889-160462390  |
| KIAA1244  | chr6:138482186-138484314  |
| BCR       | chr22:23545738-23547660   |
| TCP11     | chr6:35036313-35036814    |
| UBE2Q2    | chr15:76013001-76018102   |
| C1orf61   | chr1:156441737-156442238  |
| SLC22A5   | chr5:131700303-131700804  |
| SLC14A2   | chr18:42323129-42323630   |
| QRFP      | chr9:133719832-133720333  |
| CNTFR     | chr9:34591215-34591927    |
| SNTG2     | chr2:689829-690606        |
| C12orf44  | chr12:52437394-52440451   |
| RNF112    | chr17:19301077-19301826   |
| MTSS1     | chr8:125677523-125678024  |
| ELN       | chr7:73300420-73301817    |
| E2F1      | chr20:32281450-32282132   |
| IRX1      | chr5:3593108-3607363      |
| C11orf44  | chr11:130477546-130478369 |
| ITIH5     | chr10:7708309-7710064     |
| HRASLS5   | chr11:63256526-63259263   |
| ACTBL2    | chr5:56749404-56749905    |
| SOX1      | chr13:112101341-112104424 |
| NPR2      | chr9:35790401-35792331    |
| CASZ1     | chr1:10797539-10798870    |
| GAS6      | chr13:114739885-114741503 |
| CTBP2     | chr10:126687459-126691678 |
| CYP4B1    | chr1:47213693-47218713    |
| PRKAA2    | chr1:57109593-57112088    |
| GPR124    | chr8:37671437-37673887    |
| C15orf27  | chr15:76469361-76472169   |
| ANTXRL    | chr10:47653660-47654161   |
| ERCC6L2   | chr9:98810746-98811390    |
| KBTBD13   | chr15:65378176-65381377   |
| BCL2L14   | chr12:11859843-11860478   |
| AAGAB     | chr15:67485996-67486784   |
| ZBED5     | chr11:11170124-11170625   |
| NCAM2     | chr21:22370442-22370943   |
| IL17RB    | chr3:53879216-53880574    |
| LSMEM2    | chr3:50306407-50306908    |
| PRKG2     | chr4:82135532-82136621    |
| TMOD1     | chr9:100263737-100265421  |
| MNT       | chr17:2315793-2316498     |
| RBM38     | chr20:56014764-56017019   |

|           |                           |
|-----------|---------------------------|
| SLC6A19   | chr5:1131391-1131892      |
| HIC1      | chr17:1952859-1954482     |
| GET4      | chr7:905560-910306        |
| CYP4B1    | chr1:47220843-47221344    |
| MCF2L     | chr13:113597234-113598753 |
| TRAPPC10  | chr21:45356335-45357419   |
| GPR84     | chr12:54767503-54768205   |
| ACCSL     | chr11:43962658-43967439   |
| TNFRSF13B | chr17:16924568-16925556   |
| MARCH2    | chr19:8458145-8460387     |
| CORO2B    | chr15:68901731-68902232   |
| PHLDA3    | chr1:201463193-201466300  |
| TCF7L1    | chr2:85388468-85388969    |
| PARP4     | chr13:25024959-25025460   |
| SOX10     | chr22:38374675-38385210   |
| ADTRP     | chr6:11755629-11756415    |
| PLD4      | chr14:105400007-105400508 |
| SP5       | chr2:171571668-171572499  |
| TXNRD2    | chr22:19946720-19947435   |
| AGAP1     | chr2:236341736-236342653  |
| KCNK15    | chr20:43372255-43375469   |
| TP53TG3B  | chr16:33293753-33294962   |
| BLID      | chr11:121975944-121976729 |
| NNMT      | chr11:114127642-114129766 |
| CABLES1   | chr18:20713483-20718973   |
| TRIM11    | chr1:228562955-228563456  |
| RET       | chr10:43446319-43449123   |
| TSHZ3     | chr19:32616501-32617149   |
| GLI2      | chr2:121301887-121302388  |
| FEM1A     | chr19:4742691-4743372     |
| MNT       | chr17:2288412-2289089     |
| MLX       | chr17:40715798-40716862   |
| NFIX      | chr19:13149277-13151936   |
| GAD1      | chr2:171627157-171627658  |
| STK32C    | chr10:134277453-134279360 |
| EML4      | chr2:42272784-42282277    |
| LURAP1    | chr1:46654044-46654545    |
| NBEA      | chr13:35516038-35517206   |
| CDON      | chr11:126062231-126062732 |
| SEMA3D    | chr7:84814663-84816438    |
| EMX2      | chr10:119309867-119310505 |
| PM20D2    | chr6:89870987-89871488    |
| TCF7L1    | chr2:85359338-85365070    |
| TNNC2     | chr20:44455027-44456201   |
| NFIB      | chr9:14343368-14345095    |
| TUBB4B    | chr9:140131308-140132543  |
| SOX13     | chr1:204051245-204051883  |
| MPRIP     | chr17:16961583-16962084   |
| NDRG1     | chr8:134501120-134501788  |
| GPR153    | chr1:6346934-6353066      |
| CYP8B1    | chr3:42884189-42889451    |
| TSPAN2    | chr1:115725969-115726641  |
| WFDC2     | chr20:44098932-44099742   |
| ST3GAL4   | chr11:126253175-126254724 |
| DAD1      | chr14:22806466-22807519   |
| FAM19A5   | chr22:48884450-48888653   |

|           |                           |
|-----------|---------------------------|
| SPATA2    | chr20:48502914-48505047   |
| NCOR2     | chr12:124880861-124882229 |
| MPPED2    | chr11:30605847-30608713   |
| NALCN     | chr13:102067873-102068890 |
| SHC2      | chr19:459331-462710       |
| KIAA1324L | chr7:86688055-86689889    |
| CPN2      | chr3:194014408-194015380  |
| KIAA1456  | chr8:12966650-12967611    |
| NXPH3     | chr17:47653233-47654921   |
| CXXC11    | chr2:242837997-242838937  |
| HAS1      | chr19:52227494-52228415   |
| CDC7      | chr1:92032667-92038008    |
| F7        | chr13:113703203-113704013 |
| PLLP      | chr16:57316997-57319163   |
| GPR37L1   | chr1:202098327-202104669  |
| NACAD     | chr7:45127318-45129453    |
| PRIMA1    | chr14:94254423-94256403   |
| CAPS      | chr19:5915791-5916550     |
| DIO3      | chr14:101984201-101988252 |
| NPIPB11   | chr16:29213860-29214520   |
| DHRS3     | chr1:12608371-12610652    |
| ZNF727    | chr7:63505842-63506480    |
| TNXB      | chr6:32073664-32088022    |
| RCAN2     | chr6:46458053-46459963    |
| ANGPTL2   | chr9:129860781-129861553  |
| VRK3      | chr19:50650737-50651704   |
| ATAD2B    | chr2:23746833-23747474    |
| CARS      | chr11:3148729-3149230     |
| MMD       | chr17:53665273-53665774   |
| VPS8      | chr3:184310383-184311475  |
| BCDIN3D   | chr12:50201577-50205433   |
| LONRF3    | chrX:118107714-118111323  |
| CREB5     | chr7:28444655-28451552    |
| TNXB      | chr6:32046660-32057508    |
| PAPPA-AS1 | chr9:119417617-119418289  |
| PISD      | chr22:32021568-32022971   |
| HDAC5     | chr17:42195634-42196135   |
| GHRHR     | chr7:30957792-30958702    |
| KDM4A     | chr1:44009504-44010005    |
| CEP41     | chr7:130126000-130126879  |
| OBP2B     | chr9:136149964-136151563  |
| ATAD2B    | chr2:23607308-23610307    |
| PANK3     | chr5:168418534-168419035  |
| TNP1      | chr2:217858352-217858853  |
| PDLIM1    | chr10:97166785-97169945   |
| MAGI2     | chr7:79080904-79089412    |
| MTHFR     | chr1:11854536-11855037    |
| DOC2B     | chr17:28040-32637         |
| C1orf191  | chr1:54755730-54756744    |
| SLITRK2   | chrX:144898799-144900597  |
| PPP5D1    | chr19:47108362-47109288   |
| B4GALT6   | chr18:29263996-29266220   |
| ACTL8     | chr1:17901456-17902914    |
| PHGDH     | chr1:120279311-120280848  |
| CORO2B    | chr15:68881731-68882695   |
| DHRS3     | chr1:12613318-12614124    |



|                |                           |
|----------------|---------------------------|
| KIAA1217       | chr10:24703309-24705964   |
| PHLDA3         | chr1:201461026-201461800  |
| HAUS3          | chr4:2257171-2259544      |
| CARM1          | chr19:11009181-11010486   |
| FAM20C         | chr7:225883-232568        |
| MAMDC2         | chr9:72658517-72659809    |
| BOC            | chr3:112947239-112948098  |
| RASGRP1        | chr15:39764508-39766224   |
| SEC61A1        | chr3:127795786-127796643  |
| RCC2           | chr1:17857774-17860415    |
| VIPR2          | chr7:158861515-158862016  |
| HTRA3          | chr4:8248921-8249837      |
| LARGE          | chr22:34315404-34316548   |
| TMEM61         | chr1:55446218-55446884    |
| CASZ1          | chr1:10699638-10702031    |
| ERVFRD-1       | chr6:11216167-11216668    |
| MPPED2         | chr11:30606650-30608529   |
| NDUFB9         | chr8:125590904-125591405  |
| RHPN2          | chr19:33555347-33555848   |
| FOXD2          | chr1:48175338-48175839    |
| FOXD2          | chr1:47973964-47974866    |
| C1orf61        | chr1:156443671-156448222  |
| PTGIS          | chr20:48196400-48197100   |
| LYL1           | chr19:13177134-13178816   |
| ESR1           | chr6:152127899-152130915  |
| ARHGEF3        | chr3:57196790-57199564    |
| CDC42EP4       | chr17:71345239-71346553   |
| NALCN          | chr13:102068039-102069541 |
| PGPEP1L        | chr15:99497298-99497938   |
| TOB2           | chr22:41813652-41814984   |
| IL17D          | chr13:21283324-21284704   |
| KY             | chr3:134369383-134370024  |
| ITGB1BP1       | chr2:9538136-9540694      |
| TNRC6C         | chr17:75734340-75735253   |
| MEN1           | chr11:64602883-64603952   |
| ZNF708         | chr19:21504574-21505936   |
| TPPP           | chr5:672518-673185        |
| MRPS18A        | chr6:43639227-43640070    |
| MAPK1          | chr22:22288133-22288634   |
| DPH1           | chr17:1927673-1929300     |
| PDLIM1         | chr10:97237088-97240919   |
| TNP1           | chr2:217858091-217859991  |
| PCOLCE2        | chr3:142607249-142608617  |
| SIK1           | chr21:44861034-44861535   |
| PER2           | chr2:239199611-239201050  |
| MAFF           | chr22:38619115-38619979   |
| ARHGEF16       | chr1:3431092-3436779      |
| WARS           | chr14:101019560-101021545 |
| MUSTN1         | chr3:52877422-52877923    |
| ENSG0000027109 | chr1:95582599-95583254    |
| PET112         | chr4:152581031-152581532  |
| ZDHHC7         | chr16:84967192-84968247   |
| NPIP815        | chr16:74356713-74357545   |
| GREB1          | chr2:11622352-11623633    |
| METTL24        | chr6:110677465-110680872  |
| SOX9           | chr17:70109168-70122028   |

|           |                           |
|-----------|---------------------------|
| GMNC      | chr3:190580362-190581201  |
| NOTCH1    | chr9:139534896-139535705  |
| EIF5      | chr14:103668487-103668988 |
| FN3K      | chr17:80692562-80695019   |
| VPS8      | chr3:184314537-184320898  |
| ETNK2     | chr1:204117877-204122254  |
| COPS8     | chr2:237561495-237564049  |
| OR10D3    | chr11:124054090-124054591 |
| KLF4      | chr9:110257409-110257910  |
| BAMBI     | chr10:28966419-28967746   |
| WNT9A     | chr1:228132873-228133374  |
| CCDC39    | chr3:180587271-180588714  |
| TGM3      | chr20:2106102-2108054     |
| NOVA1     | chr14:27326624-27327125   |
| ESRRG     | chr1:217262668-217263533  |
| MTUS1     | chr8:17639119-17639759    |
| NONE      | chr5:105024024-105024525  |
| FAM90A26  | chr4:9002325-9003245      |
| ZNF98     | chr19:22805593-22806094   |
| SAMD4A    | chr14:55143042-55144690   |
| PC        | chr11:66682405-66683338   |
| G6PC      | chr17:41004118-41004853   |
| SLC48A1   | chr12:48178439-48181586   |
| TDRP      | chr8:1112844-1114537      |
| CELF4     | chr18:35157191-35158361   |
| STXBP6    | chr14:25517654-25519761   |
| MF12      | chr3:196757719-196758220  |
| SREBF1    | chr17:17729670-17730171   |
| KDM4B     | chr19:5127573-5129265     |
| OR1D5     | chr17:2898744-2900476     |
| GOLGA8B   | chr15:35014229-35015107   |
| ENO4      | chr10:118515384-118516028 |
| PDE4B     | chr1:65990694-65994094    |
| FBLN2     | chr3:13635808-13636309    |
| HENMT1    | chr1:109137859-109138360  |
| MAPK11    | chr22:50735042-50735838   |
| VPS8      | chr3:184294812-184297525  |
| RNF113B   | chr13:99112007-99112508   |
| BZW1      | chr2:201450076-201455972  |
| SLC16A3   | chr17:80109777-80111624   |
| ARHGAP39  | chr8:145925041-145926269  |
| KANK4     | chr1:62534177-62534678    |
| NKAIN3    | chr8:63160421-63162618    |
| RPS6KL1   | chr14:75389062-75390243   |
| RXRA      | chr9:137174403-137175304  |
| C1orf191  | chr1:54736601-54748854    |
| FOXP2     | chr17:80421587-80422088   |
| RPL19     | chr17:37367954-37369209   |
| HAAO      | chr2:43223759-43229533    |
| GAD1      | chr2:171626504-171628537  |
| KRTAP19-8 | chr21:32902953-32903454   |
| GRK5      | chr10:121125798-121126299 |
| BAIAP2    | chr17:79058753-79059752   |
| RECQL5    | chr17:73701417-73701918   |
| RHEB      | chr7:151156227-151159883  |
| MOB2      | chr11:1568027-1568528     |

|          |                           |
|----------|---------------------------|
| PANK3    | chr5:168431430-168431931  |
| RPL32    | chr3:12975995-12976687    |
| TPRN     | chr9:140094115-140094616  |
| LIFR     | chr5:38809192-38810934    |
| MYOF     | chr10:95192880-95193381   |
| ANGPTL2  | chr9:129866110-129867267  |
| OBP2B    | chr9:136149759-136151737  |
| GLI2     | chr2:121309913-121310414  |
| UNK      | chr17:73809300-73809990   |
| SMURF1   | chr7:98665107-98665608    |
| ALDH1L1  | chr3:125931893-125932541  |
| COL5A1   | chr9:137307049-137307550  |
| TIMM44   | chr19:8048076-8048885     |
| NPY5R    | chr4:164264419-164266041  |
| ZNF429   | chr19:21768801-21770265   |
| TMEM37   | chr2:120129201-120129702  |
| HAPLN3   | chr15:89452624-89453125   |
| DHRS3    | chr1:12606227-12611125    |
| SNTG2    | chr2:945387-947592        |
| ADIRF    | chr10:88739444-88740980   |
| WNT9A    | chr1:228131970-228136931  |
| USP24    | chr1:56052305-56053037    |
| WSCD2    | chr12:108440287-108440964 |
| SFSWAP   | chr12:131750626-131754108 |
| LONRF2   | chr2:100937245-100939207  |
| CYP4V2   | chr4:187064893-187067663  |
| ATP2A2   | chr12:110774927-110775428 |
| KIAA1217 | chr10:24702862-24706720   |
| TFAP2B   | chr6:50816890-50818656    |
| PPP5C    | chr19:46806460-46807401   |
| CPN2     | chr3:193999979-194001502  |
| ATP2B4   | chr1:203476727-203478101  |
| PTGIS    | chr20:48201013-48202093   |
| RHEB     | chr7:151380308-151381465  |
| SLC9B1   | chr4:103932792-103933450  |
| TUBB2B   | chr6:3381748-3382249      |
| RAD51B   | chr14:68541656-68542476   |
| MPV17L   | chr16:15489239-15490802   |
| ANKS1B   | chr12:100377605-100379524 |
| EHD3     | chr2:31462009-31462705    |
| LDLR     | chr19:11079487-11079988   |
| CPQ      | chr8:97674857-97675595    |
| TRMT61A  | chr14:104003522-104004223 |
| CCDC167  | chr6:37647918-37649480    |
| PPP1R35  | chr7:100063171-100065331  |
| NOS1     | chr12:117797998-117799602 |
| BCL6     | chr3:187896817-187897318  |
| FAM19A5  | chr22:49049820-49050321   |
| NPR2     | chr9:35793917-35794418    |
| SLC51A   | chr3:195962625-195963311  |
| SUV420H1 | chr11:67983575-67984208   |
| SNAI1    | chr20:48601720-48602406   |
| FADS3    | chr11:61672869-61692774   |
| FOXP4    | chr6:41394601-41398578    |
| ADORA2B  | chr17:15685923-15686815   |
| OPLAH    | chr8:145114728-145119690  |

|          |                           |
|----------|---------------------------|
| ZNF648   | chr1:182175986-182176712  |
| TMPRSS2  | chr21:42878544-42880645   |
| SDCBP2   | chr20:1312321-1313228     |
| ZBTB16   | chr11:113929401-113932677 |
| PICK1    | chr22:38393897-38394398   |
| ASXL3    | chr18:31157547-31158404   |
| RAI2     | chrX:17878406-17878907    |
| HOXC13   | chr12:54170106-54170607   |
| IRX1     | chr5:3590647-3592243      |
| TMEM11   | chr17:21111660-21112846   |
| ACVR1B   | chr12:52314595-52315096   |
| LRRN1    | chr3:3841260-3842732      |
| KAZN     | chr1:14467082-14467726    |
| ZNF469   | chr16:88118559-88128314   |
| TMEM63B  | chr6:44029478-44032312    |
| PLGLB2   | chr2:87641583-87642467    |
| LNX1     | chr4:54751682-54752630    |
| TTC1     | chr5:159474579-159475080  |
| RAB17    | chr2:238499140-238500416  |
| TMOD1    | chr9:100319532-100320033  |
| LSG1     | chr3:194941972-194943048  |
| EIF4G3   | chr1:21594830-21595825    |
| ANO8     | chr19:17435101-17435730   |
| RPUSD3   | chr3:9903805-9904911      |
| SLC22A5  | chr5:131712229-131712730  |
| ZFYVE21  | chr14:104187568-104188069 |
| FADS3    | chr11:61682451-61682952   |
| CLEC3B   | chr3:45062474-45062975    |
| MKNK1    | chr1:47073442-47073943    |
| HES1     | chr3:193921739-193922402  |
| CEBPE    | chr14:23615131-23615950   |
| SLC25A51 | chr9:38004170-38004839    |
| ADCY5    | chr3:123166061-123169482  |
| NXPH3    | chr17:47598195-47598696   |
| NCOR2    | chr12:125325988-125327512 |
| TPPP     | chr5:692327-694594        |
| WNT3A    | chr1:228194680-228195716  |
| FOXP3    | chr14:90258997-90260726   |
| CAPN13   | chr2:30912184-30912935    |
| RGMA     | chr15:93631384-93632377   |
| ADAMTS17 | chr15:100913260-100914079 |
| HUNK     | chr21:33244828-33246510   |
| HOXA2    | chr7:27147491-27148477    |
| TFAP2B   | chr6:50793111-50795867    |
| ZNF135   | chr19:58609118-58610487   |
| NFIA     | chr1:61508727-61509483    |
| INTS1    | chr7:1506062-1507057      |
| NFIA     | chr1:61515633-61517522    |
| DLC1     | chr8:12808716-12810028    |
| ARID1B   | chr6:157557065-157558357  |
| GPR133   | chr12:131531476-131533762 |
| C11orf44 | chr11:130747932-130748433 |
| ZNF135   | chr19:58608078-58610893   |
| TBC1D26  | chr17:15689240-15690065   |
| ZNF423   | chr16:49872691-49873192   |
| RUNX1    | chr21:36041566-36044059   |

|                |                           |
|----------------|---------------------------|
| ERH            | chr14:69726401-69729556   |
| TBC1D26        | chr17:15689175-15690371   |
| ARFGAP3        | chr22:43114858-43117405   |
| KCNIP3         | chr2:96050796-96051423    |
| NGF            | chr1:115825638-115826139  |
| ENSG0000026937 | chr14:101999292-102002832 |
| DUSP8          | chr11:1580088-1580589     |
| AGTPBP1        | chr9:88419752-88421086    |
| GPR133         | chr12:131753109-131753610 |
| DLC1           | chr8:12808274-12810745    |
| MAP3K11        | chr11:65373899-65374400   |
| ARHGEF10       | chr8:1921986-1922907      |
| NECAB1         | chr8:91996841-91998100    |
| WNT7B          | chr22:46422501-46423961   |
| TACC2          | chr10:123871601-123874849 |
| ACKR3          | chr2:237562939-237563440  |
| ZNF385A        | chr12:54772184-54773868   |
| MRPL36         | chr5:1539209-1541447      |
| UHMK1          | chr1:162517942-162519332  |
| RNF24          | chr20:4021682-4022394     |
| TPCN2          | chr11:69191168-69191669   |
| AGTRAP         | chr1:11846815-11852883    |
| RUNX1          | chr21:36040841-36044634   |
| NR4A1          | chr12:52442584-52452944   |
| ZNF385A        | chr12:54768810-54771452   |
| PRKCZ          | chr1:2064917-2066869      |
| UNKL           | chr16:1428687-1429726     |
| SLC47A1        | chr17:19482632-19483329   |
| TRMT61A        | chr14:104015399-104019617 |
| NR4A1          | chr12:52429240-52431973   |
| RALGPS1        | chr9:129873203-129874722  |
| NR4A1          | chr12:52455865-52457011   |
| C19orf77       | chr19:3374354-3376331     |
| MARK3          | chr14:103985731-103989036 |
| GPR133         | chr12:131529378-131536009 |
| TNS1           | chr2:218843068-218844322  |
| NMUR1          | chr2:232467407-232471661  |
| CSPG4          | chr15:76014988-76017117   |
| NR4A1          | chr12:52448335-52448836   |
| PLD6           | chr17:16958353-16960384   |
| AKAP13         | chr15:86315394-86316189   |
| NFIA           | chr1:61508326-61509719    |
| NR4A1          | chr12:52443355-52445895   |
| FGD2           | chr6:36964187-36967016    |
| ADCY2          | chr5:7802312-7802813      |
| METAP2         | chr12:95942143-95942785   |
| ACOT7          | chr1:6347807-6349048      |
| PPARG          | chr3:12328612-12330661    |
| PTPRS          | chr19:5040794-5042035     |
| AQP4           | chr18:24235784-24237535   |
| TSC22D4        | chr7:100047969-100048595  |
| ARID1B         | chr6:157555978-157559161  |
| FGD2           | chr6:36964669-36967556    |
| CRELD2         | chr22:50340866-50351375   |
| EGFLAM         | chr5:38555807-38558012    |
| ZDHHC21        | chr9:14345627-14353849    |

|                |                           |
|----------------|---------------------------|
| ATP6V1B1       | chr2:71205525-71206313    |
| DST            | chr6:56707596-56709058    |
| TMBIM6         | chr12:50202188-50203847   |
| EBAG9          | chr8:110655343-110658195  |
| BEND7          | chr10:13570195-13570696   |
| EPHB3          | chr3:184321647-184322652  |
| LTBP4          | chr19:41192804-41193482   |
| SORBS1         | chr10:97173649-97174483   |
| ETNK2          | chr1:204052543-204053857  |
| HABP2          | chr10:115406275-115406776 |
| SLC25A52       | chr18:29303731-29304605   |
| UPF2           | chr10:11864929-11866063   |
| MOXD1          | chr6:132331969-132332792  |
| PLEKHA8        | chr7:30173828-30177090    |
| AGTPBP1        | chr9:88418882-88421755    |
| TACC2          | chr10:123870860-123876482 |
| ANKRD46        | chr8:101524951-101525687  |
| STK32B         | chr4:5206860-5207361      |
| SRCAP          | chr16:30750468-30751218   |
| PTGIS          | chr20:48181890-48185277   |
| NGFR           | chr17:47591411-47594017   |
| KIAA0513       | chr16:85469415-85471290   |
| RAB17          | chr2:238535617-238536947  |
| SORBS1         | chr10:97175147-97175918   |
| PLD3           | chr19:40847581-40848285   |
| INTS1          | chr7:1505231-1509462      |
| CHRAC1         | chr8:141642225-141646535  |
| KIAA0513       | chr16:85607470-85608631   |
| WDFY2          | chr13:52342719-52345371   |
| ENSG0000026937 | chr14:101997409-102003199 |
| KCNIP3         | chr2:96012713-96013214    |
| ATF6B          | chr6:32074680-32082527    |
| TSKU           | chr11:76463179-76464525   |
| PCGF5          | chr10:92921739-92923944   |
| MEGF6          | chr1:3432579-3434432      |
| CCDC40         | chr17:78044533-78045726   |
| PIGU           | chr20:33145915-33148115   |
| GPX4           | chr19:1150582-1157092     |
| NFIX           | chr19:13179352-13182337   |
| SUN1           | chr7:906116-908025        |
| PALM           | chr19:718241-719918       |
| PRSS57         | chr19:675163-681208       |
| ANP32A         | chr15:68876944-68877597   |
| ETF1           | chr5:137802986-137803650  |
| ADAMTS15       | chr11:130479170-130480391 |
| B4GALT5        | chr20:48363745-48365168   |
| TBC1D26        | chr17:15686072-15686573   |
| PLXNB1         | chr3:48466490-48466991    |
| EGFLAM         | chr5:38554652-38558266    |
| PSMG1          | chr21:40278330-40280018   |
| AUNIP          | chr1:26131314-26131961    |
| ATF6B          | chr6:32055130-32056357    |
| A4GALT         | chr22:43087468-43088774   |
| BANP           | chr16:88119974-88124377   |
| ALKBH3         | chr11:43963597-43965719   |
| AK4            | chr1:65612234-65617601    |

|          |                           |
|----------|---------------------------|
| EBAG9    | chr8:110654581-110658793  |
| GNA11    | chr19:3093729-3100980     |
| PNOC     | chr8:28226738-28227467    |
| MLLT6    | chr17:36849552-36850179   |
| H LCS    | chr21:38352773-38353439   |
| KLF6     | chr10:3954108-3954739     |
| AXL      | chr19:41727677-41728358   |
| MEGF6    | chr1:3418740-3419241      |
| GARS     | chr7:30736778-30737440    |
| PTPRN    | chr2:220146395-220146896  |
| HES1     | chr3:193987842-193992107  |
| KDM4B    | chr19:5291567-5293769     |
| NR4A1    | chr12:52457643-52458841   |
| OR10H3   | chr19:15890289-15890790   |
| CXCL12   | chr10:45070872-45071373   |
| PPP1R13B | chr14:104189371-104190717 |
| ZBTB7C   | chr18:45554194-45555102   |
| RIC3     | chr11:8083610-8084697     |
| MAMLD1   | chrX:149530711-149535820  |
| TSEN15   | chr1:184598696-184599197  |
| NUB1     | chr7:151156952-151157986  |
| SREBF1   | chr17:17600021-17600522   |
| ZNF507   | chr19:32619263-32619902   |
| NIPAL3   | chr1:24763901-24764928    |
| ZNF251   | chr8:145925263-145926011  |
| PALM     | chr19:717795-721768       |
| KLF2     | chr19:16507662-16513215   |
| STEAP3   | chr2:120063360-120064727  |
| ORAI1    | chr12:122070725-122071385 |
| AKAP12   | chr6:151646703-151647204  |
| MARVELD1 | chr10:99477337-99478405   |
| UST      | chr6:149210545-149211046  |
| GBX2     | chr2:236578080-236580610  |
| STX8     | chr17:9141971-9145717     |
| IGLL1    | chr22:23597826-23600640   |
| ZC3H7B   | chr22:41763175-41764974   |
| CYP4A11  | chr1:47271382-47273540    |
| EPN2     | chr17:19204903-19205530   |
| RTN3     | chr11:63530324-63530825   |
| FXR1     | chr3:180587633-180588468  |
| NFX1     | chr9:33349757-33350258    |
| MKLN1    | chr7:130969153-130971115  |
| SRCIN1   | chr17:36618585-36627032   |
| MBOAT1   | chr6:19836295-19841485    |
| MARVELD3 | chr16:71756732-71758108   |
| CCRN4L   | chr4:139903378-139904013  |
| NFIX     | chr19:13186243-13191224   |
| IL34     | chr16:70714166-70716712   |
| LRP5     | chr11:68080112-68082868   |
| IFT43    | chr14:76454769-76455270   |
| BLID     | chr11:121611635-121613335 |
| RUSC2    | chr9:35563613-35564114    |
| PEX14    | chr1:10700568-10701627    |
| ZDHHC21  | chr9:14339803-14354451    |
| ZC3H12A  | chr1:37920257-37921500    |
| ERH      | chr14:69725918-69732625   |

|                |                           |
|----------------|---------------------------|
| METAP2         | chr12:95941403-95943242   |
| C2CD4B         | chr15:62360449-62361078   |
| VASP           | chr19:46050565-46051448   |
| CHRA1          | chr8:141639397-141641296  |
| AES            | chr19:3047034-3048326     |
| CABIN1         | chr22:24447475-24448989   |
| LGI2           | chr4:24913208-24915188    |
| PLEKHA8        | chr7:30179322-30179823    |
| MFSD12         | chr19:3535995-3538018     |
| MAMLD1         | chrX:149530465-149536120  |
| PUF60          | chr8:144904579-144907031  |
| ADAMTS15       | chr11:130476305-130477000 |
| CRTC3          | chr15:91175794-91176295   |
| C6orf70        | chr6:170495008-170495642  |
| ARFGAP3        | chr22:43111929-43117933   |
| WDPCP          | chr2:63286686-63287325    |
| ZNF423         | chr16:49892348-49893749   |
| ENSG0000022632 | chr2:241929239-241929740  |
| ATP11A         | chr13:113597279-113598337 |
| TENC1          | chr12:53460102-53460603   |
| POLR2F         | chr22:38377512-38378013   |
| SCARA5         | chr8:27795049-27795550    |
| ATF6B          | chr6:32049262-32050772    |
| KDM4B          | chr19:5288180-5294551     |
| ZFP36L2        | chr2:43258847-43260971    |
| KIAA0513       | chr16:85469118-85471765   |
| IRX2           | chr5:2739110-2741457      |
| PXN            | chr12:120662325-120664173 |
| NFIA           | chr1:61514262-61524636    |
| CLCF1          | chr11:67133862-67134803   |
| EGFLAM         | chr5:38448708-38449336    |
| ZNF124         | chr1:247274400-247275651  |
| LRP5           | chr11:68167306-68167807   |
| DLG5           | chr10:79631179-79634225   |
| NAIF1          | chr9:130712127-130713567  |
| NR4A1          | chr12:52424888-52441653   |
| TBC1D16        | chr17:77924929-77925430   |
| BLID           | chr11:121611260-121614301 |
| PKDCC          | chr2:42274329-42279172    |
| SEPT9          | chr17:75859763-75861799   |
| HLX            | chr1:221785500-221786001  |
| AQP4           | chr18:24235204-24237921   |
| SH3PXD2B       | chr5:171862874-171865462  |
| AES            | chr19:3055217-3058250     |
| CUL5           | chr11:107985590-107986397 |
| DUOX1          | chr15:45477537-45480871   |
| CDON           | chr11:125820339-125820840 |
| CAPRIN1        | chr11:34035439-34036071   |
| FAM96A         | chr15:64338150-64338651   |
| ENSG0000022632 | chr2:241926191-241928420  |
| EDN2           | chr1:41846177-41849194    |
| SLC37A3        | chr7:140062454-140062955  |
| MNF1           | chr6:33595793-33596294    |
| ARHGEF10       | chr8:1920934-1923428      |
| MAN1A1         | chr6:119416858-119417359  |
| ARHGEF10L      | chr1:17899686-17900366    |



|                 |                           |
|-----------------|---------------------------|
| SLC47A1         | chr17:19482165-19484146   |
| MMD             | chr17:53342369-53344411   |
| EIF3F           | chr11:8039715-8041984     |
| FASN            | chr17:80061211-80062905   |
| ENSG00000261131 | chr16:15489396-15490447   |
| SGSM2           | chr17:2273206-2273707     |
| RASA3           | chr13:114739968-114741357 |
| BAG5            | chr14:104005072-104005573 |
| ZNF423          | chr16:49862462-49863099   |
| GPX4            | chr19:1143546-1158955     |
| APOPT1          | chr14:104047912-104048413 |
| TCP10L          | chr21:33822617-33824514   |
| TPRA1           | chr3:126710902-126711403  |
| CISD3           | chr17:36897960-36899099   |
| CRYAA           | chr21:44807037-44807538   |
| ATP5L2          | chr22:43033018-43033519   |
| UNKL            | chr16:1427070-1430762     |
| ZNF664          | chr12:124888181-124888878 |
| DHX36           | chr3:153838317-153842051  |
| HABP4           | chr9:99378377-99382672    |
| EPS8L1          | chr19:55622470-55626452   |
| BCAP31          | chrX:152965678-152966179  |
| RNF223          | chr1:960036-961065        |
| ATP5D           | chr19:1239164-1240992     |
| MPHOSPH9        | chr12:123627264-123628636 |
| OR10H3          | chr19:15891478-15891979   |
| SCARA3          | chr8:27559055-27561227    |
| CAMTA1          | chr1:7765390-7765891      |
| KCTD19          | chr16:67334984-67336200   |
| VEZF1           | chr17:56012634-56013957   |
| WASF2           | chr1:27740769-27741270    |
| LRP2BP          | chr4:186130418-186132001  |
| RALGPS1         | chr9:129851205-129853258  |
| COL15A1         | chr9:101727948-101728449  |
| FNDC4           | chr2:27717406-27718632    |
| GNA11           | chr19:3092948-3101962     |
| TCF7L2          | chr10:114765168-114765669 |
| SLC35C2         | chr20:44977636-44979074   |
| ARL8A           | chr1:202100242-202102782  |
| ALX1            | chr12:86105294-86105975   |
| SLC25A30        | chr13:45953874-45954549   |
| SPSB4           | chr3:140834938-140835439  |
| NOL10           | chr2:10594224-10594725    |
| AHDC1           | chr1:27912786-27913287    |
| ATF6B           | chr6:32038249-32038750    |
| XKR3            | chr22:17082081-17083761   |
| TMEM200C        | chr18:5628491-5629159     |
| OPA3            | chr19:46032028-46032529   |
| RPL39L          | chr3:186665797-186666559  |
| RXRA            | chr9:137230827-137231654  |
| MAP2K3          | chr17:21260651-21261152   |
| KAZN            | chr1:15239479-15241088    |
| ACOT7           | chr1:6351266-6352674      |
| PRSS48          | chr4:152579808-152580465  |
| KSR1            | chr17:25866907-25868761   |
| NR4A1           | chr12:52453043-52459500   |

|                |                           |
|----------------|---------------------------|
| MCF2L          | chr13:113644555-113653438 |
| BZRAP1         | chr17:56401777-56402551   |
| GCH1           | chr14:55150146-55154358   |
| EGFLAM         | chr5:38465607-38469717    |
| ZNF100         | chr19:21769046-21769547   |
| UPF2           | chr10:11911759-11912487   |
| KLF2           | chr19:16504666-16518313   |
| EEPD1          | chr7:36405924-36407637    |
| RPTOR          | chr17:78932683-78934287   |
| RADIL          | chr7:4921314-4923354      |
| PEX14          | chr1:10745676-10746520    |
| SLC25A30       | chr13:45955192-45956595   |
| PACSIN2        | chr22:43304137-43304638   |
| MAFF           | chr22:38643018-38643519   |
| ASAP2          | chr2:9532475-9533588      |
| NFIA           | chr1:61519137-61520656    |
| CREB5          | chr7:28995158-28996600    |
| B4GALT5        | chr20:48202887-48203388   |
| CHST14         | chr15:40803501-40804311   |
| NGFR           | chr17:47590277-47594701   |
| BAIAP2L2       | chr22:38494792-38495293   |
| SSR1           | chr6:7172976-7174056      |
| BMP1           | chr8:22084936-22085784    |
| TRIM32         | chr9:119424504-119426005  |
| ENSG0000022632 | chr2:241907682-241908352  |
| RAN            | chr12:131404347-131406170 |
| WBSCR16        | chr7:74291048-74291549    |
| WDFY2          | chr13:52342267-52347312   |
| DLST           | chr14:75384063-75384898   |
| PRKCZ          | chr1:2063504-2068696      |
| TACC1          | chr8:38613841-38615540    |
| MFSD6L         | chr17:8577867-8578368     |
| GRIA1          | chr5:153380754-153381255  |
| LARGE          | chr22:34535561-34536062   |
| MFAP2          | chr1:17252057-17252823    |
| SPIN1          | chr9:91148766-91149555    |
| CROCC          | chr1:17302762-17303263    |
| NUMBL          | chr19:41105701-41106337   |
| KLF15          | chr3:126073282-126076990  |
| SCARA3         | chr8:27559148-27561227    |
| NAIF1          | chr9:130707757-130708501  |
| NEDD9          | chr6:11213561-11215297    |
| NR4A1          | chr12:52450031-52450532   |
| UHMK1          | chr1:162524452-162524953  |
| EPN2           | chr17:19244980-19246059   |
| ZNF664         | chr12:124852879-124856661 |
| B9D1           | chr17:19174027-19174528   |
| CKMT2          | chr5:80530555-80531056    |
| GARS           | chr7:30595851-30596690    |
| THAP4          | chr2:242503649-242504150  |
| EPN2           | chr17:19216139-19216640   |
| RPLP1          | chr15:70381112-70381613   |
| ACKR3          | chr2:237795340-237795841  |
| TRAF1          | chr9:123656388-123657506  |
| SLC7A2         | chr8:17354477-17356857    |
| ARHGEF16       | chr1:3454836-3457474      |

|          |                           |
|----------|---------------------------|
| PKD1     | chr16:2171265-2173482     |
| FBLN5    | chr14:92350380-92352806   |
| IGLL1    | chr22:23597410-23601555   |
| SLC25A52 | chr18:29303331-29305041   |
| SEPT9    | chr17:75859128-75863055   |
| DIP2C    | chr10:353421-354123       |
| TNS1     | chr2:217850623-217851907  |
| ZBTB10   | chr8:81610219-81610846    |
| APBA1    | chr9:71962067-71962568    |
| AGPAT3   | chr21:45348046-45350086   |
| ASB4     | chr7:95178449-95180817    |
| SPTAN1   | chr9:131390263-131391482  |
| ITGBL1   | chr13:103051808-103053452 |
| PRELP    | chr1:203447972-203448655  |
| PDGFA    | chr7:228178-232590        |
| NAV2     | chr11:19585619-19586705   |
| ERGIC1   | chr5:172328719-172329753  |
| MMD      | chr17:53342118-53345641   |
| TLR3     | chr4:187065989-187066939  |
| KDM4B    | chr19:5308471-5309385     |
| NDUFA10  | chr2:240628705-240629422  |
| A3GALT2  | chr1:33733821-33735645    |
| DLG5     | chr10:79625144-79625645   |
| IGF1R    | chr15:99498734-99499235   |
| EFCAB14  | chr1:47214740-47218317    |
| OR10H3   | chr19:15889922-15892320   |
| RADIL    | chr7:4920948-4923706      |
| FBLN5    | chr14:92365557-92366058   |
| CHCHD6   | chr3:126546805-126547525  |
| TMEM59L  | chr19:18769025-18771899   |
| ZDHHC11  | chr5:784311-785497        |
| POU5F2   | chr5:92956646-92957508    |
| ORAI1    | chr12:122116829-122117478 |
| EDN2     | chr1:41845046-41849571    |
| FOXP1    | chr7:4742259-4743342      |
| STK32C   | chr10:134227374-134227875 |
| EPPK1    | chr8:144951172-144951824  |
| COL4A1   | chr13:110874012-110874641 |
| SLC30A2  | chr1:26351293-26351794    |
| KIAA0513 | chr16:85406576-85407077   |
| TMEM200C | chr18:5628058-5631063     |
| DISC1    | chr1:232315729-232316419  |
| SMIM2    | chr13:44792622-44794031   |
| PTPRS    | chr19:5059809-5060310     |
| ERH      | chr14:69753617-69754118   |
| SSBP2    | chr5:81152957-81153753    |
| LIFR     | chr5:38416363-38417700    |
| TDRD5    | chr1:179555353-179555989  |
| PEX14    | chr1:10726299-10726800    |
| CTBP2    | chr10:126840151-126842098 |
| PRDM16   | chr1:3112597-3113098      |
| WBSCR16  | chr7:74290739-74291526    |
| TOMM20   | chr1:234952782-234953919  |
| XKR3     | chr22:17081603-17084719   |
| IGF2R    | chr6:160461889-160462390  |
| IGLL1    | chr22:23545738-23547660   |

|          |                           |
|----------|---------------------------|
| ANKS1A   | chr6:35036313-35036814    |
| CSPG4    | chr15:76013001-76018102   |
| MEF2D    | chr1:156441737-156442238  |
| SETBP1   | chr18:42323129-42323630   |
| ABL1     | chr9:133719832-133720333  |
| TMEM18   | chr2:689829-690606        |
| NR4A1    | chr12:52437394-52440451   |
| MFAP4    | chr17:19301077-19301826   |
| NDUFB9   | chr8:125677523-125678024  |
| WBSCR28  | chr7:73300420-73301817    |
| PXMP4    | chr20:32281450-32282132   |
| ADAMTS15 | chr11:130477546-130478369 |
| GPBP1    | chr5:56749404-56749905    |
| TEX29    | chr13:112101341-112104424 |
| PEX14    | chr1:10797539-10798870    |
| RASA3    | chr13:114739885-114741503 |
| ZRANB1   | chr10:126687459-126691678 |
| EFCAB14  | chr1:47213693-47218713    |
| BRF2     | chr8:37671437-37673887    |
| ETFA     | chr15:76469361-76472169   |
| HSD17B3  | chr9:98810746-98811390    |
| PDCD7    | chr15:65378176-65381377   |
| ETV6     | chr12:11859843-11860478   |
| SMAD3    | chr15:67485996-67486784   |
| CSNK2A3  | chr11:11170124-11170625   |
| CHDH     | chr3:53879216-53880574    |
| GNAI2    | chr3:50306407-50306908    |
| TSTD2    | chr9:100263737-100265421  |
| METTL16  | chr17:2315793-2316498     |
| CTCFL    | chr20:56014764-56017019   |
| SLC12A7  | chr5:1131391-1131892      |
| OVCA2    | chr17:1952859-1954482     |
| SUN1     | chr7:905560-910306        |
| EFCAB14  | chr1:47220843-47221344    |
| ATP11A   | chr13:113597234-113598753 |
| AGPAT3   | chr21:45356335-45357419   |
| ZNF385A  | chr12:54767503-54768205   |
| ALKBH3   | chr11:43962658-43967439   |
| MPRIIP   | chr17:16924568-16925556   |
| RAB11B   | chr19:8458145-8460387     |
| ANP32A   | chr15:68901731-68902232   |
| CSRP1    | chr1:201463193-201466300  |
| TGOLN2   | chr2:85388468-85388969    |
| C1QTNF9  | chr13:25024959-25025460   |
| TMEM170B | chr6:11755629-11756415    |
| AHNAK2   | chr14:105400007-105400508 |
| ARVCF    | chr22:19946720-19947435   |
| SH3BP4   | chr2:236341736-236342653  |
| SORL1    | chr11:121975944-121976729 |
| OBSCN    | chr1:228562955-228563456  |
| BMS1     | chr10:43446319-43449123   |
| ZNF507   | chr19:32616501-32617149   |
| INHBB    | chr2:121301887-121302388  |
| DPP9     | chr19:4742691-4743372     |
| SGSM2    | chr17:2288412-2289089     |
| LYL1     | chr19:13149277-13151936   |

|                |                           |
|----------------|---------------------------|
| SP5            | chr2:171627157-171627658  |
| INPP5A         | chr10:134277453-134279360 |
| PKDCC          | chr2:42272784-42282277    |
| TSPAN1         | chr1:46654044-46654545    |
| RPUSD4         | chr11:126062231-126062732 |
| RAB11FIP2      | chr10:119309867-119310505 |
| GABRR1         | chr6:89870987-89871488    |
| TGOLN2         | chr2:85359338-85365070    |
| ZDHC21         | chr9:14343368-14345095    |
| ETNK2          | chr1:204051245-204051883  |
| PLD6           | chr17:16961583-16962084   |
| ST3GAL1        | chr8:134501120-134501788  |
| ACOT7          | chr1:6346934-6353066      |
| ACKR2          | chr3:42884189-42889451    |
| NGF            | chr1:115725969-115726641  |
| DCPS           | chr11:126253175-126254724 |
| OR4E2          | chr14:22806466-22807519   |
| SLC9A8         | chr20:48502914-48505047   |
| ZNF664         | chr12:124880861-124882229 |
| DCDC1          | chr11:30605847-30608713   |
| HES1           | chr3:194014408-194015380  |
| DLC1           | chr8:12966650-12967611    |
| TGFBR3         | chr1:92032667-92038008    |
| MCF2L          | chr13:113703203-113704013 |
| ARL8A          | chr1:202098327-202104669  |
| RANBP3         | chr19:5915791-5916550     |
| ENSG0000026937 | chr14:101984201-101988252 |
| LAT            | chr16:29213860-29214520   |
| TNFRSF1B       | chr1:12608371-12610652    |
| ATF6B          | chr6:32073664-32088022    |
| RALGPS1        | chr9:129860781-129861553  |
| IZUMO2         | chr19:50650737-50651704   |
| OSBPL5         | chr11:3148729-3149230     |
| TMEM100        | chr17:53665273-53665774   |
| EPHB3          | chr3:184310383-184311475  |
| TMBIM6         | chr12:50201577-50205433   |
| ATF6B          | chr6:32046660-32057508    |
| TRIM32         | chr9:119417617-119418289  |
| SFI1           | chr22:32021568-32022971   |
| G6PC3          | chr17:42195634-42196135   |
| AQP1           | chr7:30957792-30958702    |
| PTPRF          | chr1:44009504-44010005    |
| MEST           | chr7:130126000-130126879  |
| SURF6          | chr9:136149964-136151563  |
| SLIT3          | chr5:168418534-168419035  |
| TNS1           | chr2:217858352-217858853  |
| SORBS1         | chr10:97166785-97169945   |
| AGTRAP         | chr1:11854536-11855037    |
| SSBP3          | chr1:54755730-54756744    |
| CALM3          | chr19:47108362-47109288   |
| ARHGEF10L      | chr1:17901456-17902914    |
| HMGCS2         | chr1:120279311-120280848  |
| ANP32A         | chr15:68881731-68882695   |
| TNFRSF1B       | chr1:12613318-12614124    |
| ARHGAP21       | chr10:24703309-24705964   |
| CSRP1          | chr1:201461026-201461800  |

|           |                           |
|-----------|---------------------------|
| MXD4      | chr4:2257171-2259544      |
| YIPF2     | chr19:11009181-11010486   |
| PDGFA     | chr7:225883-232568        |
| SPICE1    | chr3:112947239-112948098  |
| THBS1     | chr15:39764508-39766224   |
| RUVBL1    | chr3:127795786-127796643  |
| ARHGEF10L | chr1:17857774-17860415    |
| WDR60     | chr7:158861515-158862016  |
| SH3TC1    | chr4:8248921-8249837      |
| PEX14     | chr1:10699638-10702031    |
| NEDD9     | chr6:11216167-11216668    |
| DCDC1     | chr11:30606650-30608529   |
| MTSS1     | chr8:125590904-125591405  |
| TRABD2B   | chr1:48175338-48175839    |
| TRABD2B   | chr1:47973964-47974866    |
| MEF2D     | chr1:156443671-156448222  |
| B4GALT5   | chr20:48196400-48197100   |
| NFIX      | chr19:13177134-13178816   |
| SYNE1     | chr6:152127899-152130915  |
| IL17RD    | chr3:57196790-57199564    |
| SDK2      | chr17:71345239-71346553   |
| IGF1R     | chr15:99497298-99497938   |
| TEF       | chr22:41813652-41814984   |
| N6AMT2    | chr13:21283324-21284704   |
| ASAP2     | chr2:9538136-9540694      |
| SEPT9     | chr17:75734340-75735253   |
| CDC42BPG  | chr11:64602883-64603952   |
| ZNF431    | chr19:21504574-21505936   |
| CEP72     | chr5:672518-673185        |
| RSPH9     | chr6:43639227-43640070    |
| PPM1F     | chr22:22288133-22288634   |
| RTN4RL1   | chr17:1927673-1929300     |
| SORBS1    | chr10:97237088-97240919   |
| TNS1      | chr2:217858091-217859991  |
| HSF2BP    | chr21:44861034-44861535   |
| TMEM184B  | chr22:38619115-38619979   |
| MEGF6     | chr1:3431092-3436779      |
| BEGAIN    | chr14:101019560-101021545 |
| TMEM110   | chr3:52877422-52877923    |
| TMEM56    | chr1:95582599-95583254    |
| PRSS48    | chr4:152581031-152581532  |
| CRISPLD2  | chr16:84967192-84968247   |
| PSMD7     | chr16:74356713-74357545   |
| E2F6      | chr2:11622352-11623633    |
| EGFL7     | chr9:139534896-139535705  |
| TNFAIP2   | chr14:103668487-103668988 |
| EPHB3     | chr3:184314537-184320898  |
| SOX13     | chr1:204117877-204122254  |
| ACKR3     | chr2:237561495-237564049  |
| PRSS38    | chr1:228132873-228133374  |
| FXR1      | chr3:180587271-180588714  |
| STK35     | chr20:2106102-2108054     |
| GPATCH2   | chr1:217262668-217263533  |
| PDGFRL    | chr8:17639119-17639759    |
| HMX1      | chr4:9002325-9003245      |
| ZNF492    | chr19:22805593-22806094   |

|          |                           |
|----------|---------------------------|
| GCH1     | chr14:55143042-55144690   |
| LRFN4    | chr11:66682405-66683338   |
| AOC3     | chr17:41004118-41004853   |
| HDAC7    | chr12:48178439-48181586   |
| DLGAP2   | chr8:1112844-1114537      |
| RAI1     | chr17:17729670-17730171   |
| PTPRS    | chr19:5127573-5129265     |
| RAP1GAP2 | chr17:2898744-2900476     |
| GJD2     | chr15:35014229-35015107   |
| HSPA12A  | chr10:118515384-118516028 |
| LEPR     | chr1:65990694-65994094    |
| WNT7A    | chr3:13635808-13636309    |
| NBPF6    | chr1:109137859-109138360  |
| PLXNB2   | chr22:50735042-50735838   |
| EPHB3    | chr3:184294812-184297525  |
| STK24    | chr13:99112007-99112508   |
| AOX1     | chr2:201450076-201455972  |
| FASN     | chr17:80109777-80111624   |
| ZNF251   | chr8:145925041-145926269  |
| INADL    | chr1:62534177-62534678    |
| WDR5     | chr9:137174403-137175304  |
| SSBP3    | chr1:54736601-54748854    |
| NARF     | chr17:80421587-80422088   |
| STAC2    | chr17:37367954-37369209   |
| ZFP36L2  | chr2:43223759-43229533    |
| SP5      | chr2:171626504-171628537  |
| TIAM1    | chr21:32902953-32903454   |
| RGS10    | chr10:121125798-121126299 |
| AATK     | chr17:79058753-79059752   |
| ITGB4    | chr17:73701417-73701918   |
| NUB1     | chr7:151156227-151159883  |
| DUSP8    | chr11:1568027-1568528     |
| SLIT3    | chr5:168431430-168431931  |
| IQSEC1   | chr3:12975995-12976687    |
| OSMR     | chr5:38809192-38810934    |
| CYP26A1  | chr10:95192880-95193381   |
| RALGPS1  | chr9:129866110-129867267  |
| SURF6    | chr9:136149759-136151737  |
| INHBB    | chr2:121309913-121310414  |
| UNC13D   | chr17:73809300-73809990   |
| TRRAP    | chr7:98665107-98665608    |
| KLF15    | chr3:125931893-125932541  |
| RXRA     | chr9:137307049-137307550  |
| ELAVL1   | chr19:8048076-8048885     |
| ZNF100   | chr19:21768801-21770265   |
| DBI      | chr2:120129201-120129702  |
| MFGE8    | chr15:89452624-89453125   |
| TNFRSF1B | chr1:12606227-12611125    |
| GLUD1    | chr10:88739444-88740980   |
| PRSS38   | chr1:228131970-228136931  |
| PPAP2B   | chr1:56052305-56053037    |
| ASCL4    | chr12:108440287-108440964 |
| GPR133   | chr12:131750626-131754108 |
| TLR3     | chr4:187064893-187067663  |
| ANAPC7   | chr12:110774927-110775428 |
| ARHGAP21 | chr10:24702862-24706720   |

|                 |                           |
|-----------------|---------------------------|
| HIF3A           | chr19:46806460-46807401   |
| HES1            | chr3:193999979-194001502  |
| OPTC            | chr1:203476727-203478101  |
| B4GALT5         | chr20:48201013-48202093   |
| PRKAG2          | chr7:151380308-151381465  |
| CISD2           | chr4:103932792-103933450  |
| SLC22A23        | chr6:3381748-3382249      |
| ZFP36L1         | chr14:68541656-68542476   |
| ENSG00000261131 | chr16:15489239-15490802   |
| XDH             | chr2:31462009-31462705    |
| SMARCA4         | chr19:11079487-11079988   |
| TSPYL5          | chr8:97674857-97675595    |
| BAG5            | chr14:104003522-104004223 |
| MDGA1           | chr6:37647918-37649480    |
| TSC22D4         | chr7:100063171-100065331  |
| KSR2            | chr12:117797998-117799602 |
| LPP             | chr3:187896817-187897318  |
| SPAG8           | chr9:35793917-35794418    |
| PCYT1A          | chr3:195962625-195963311  |
| UBE2V1          | chr20:48601720-48602406   |
| RAB3IL1         | chr11:61672869-61692774   |
| NCR2            | chr6:41394601-41398578    |
| TBC1D26         | chr17:15685923-15686815   |
| GLUL            | chr1:182175986-182176712  |
| SOX10           | chr22:38393897-38394398   |
| CALCOCO1        | chr12:54170106-54170607   |
| DHRS7B          | chr17:21111660-21112846   |
| ACVRL1          | chr12:52314595-52315096   |
| PRDM2           | chr1:14467082-14467726    |
| BANP            | chr16:88118559-88128314   |
| VEGFA           | chr6:44029478-44032312    |
| PLGLB1          | chr2:87641583-87642467    |
| CHIC2           | chr4:54751682-54752630    |
| PWWP2A          | chr5:159474579-159475080  |
| TSTD2           | chr9:100319532-100320033  |
| XXYL1           | chr3:194941972-194943048  |
| ECE1            | chr1:21594830-21595825    |
| MRPL34          | chr19:17435101-17435730   |
| CIDEC           | chr3:9903805-9904911      |
| IRF1            | chr5:131712229-131712730  |
| PPP1R13B        | chr14:104187568-104188069 |
| RAB3IL1         | chr11:61682451-61682952   |
| CPN2            | chr3:193921739-193922402  |
| SLC7A8          | chr14:23615131-23615950   |
| SHB             | chr9:38004170-38004839    |
| NGFR            | chr17:47598195-47598696   |
| SCARB1          | chr12:125325988-125327512 |
| EFCAB11         | chr14:90258997-90260726   |
| LCLAT1          | chr2:30912184-30912935    |
| CERS3           | chr15:100913260-100914079 |
| HOXA3           | chr7:27147491-27148477    |



**Supplementary Table 2-5. BCC-UP-mRNA**

AADAT  
AASS  
ABCB11  
ABCC1  
ABCC12  
ABI2  
ABI3BP  
ABTB2  
AC005062.2  
AC005307.1  
AC005307.4  
AC005336.4  
AC005754.8  
AC007743.1  
AC009948.5  
AC016582.2  
AC024592.9  
AC062029.1  
AC092159.2  
AC092159.3  
AC093627.7  
AC159540.1  
AC226118.1  
ACBD6  
ACOT11  
ACSS1  
ACVR1  
ACVR2B-AS1  
ADAD2  
ADAM11  
ADAM19  
ADAM1A  
ADAM23  
ADAMDEC1  
ADAMTS12  
ADAMTS14  
ADAMTS17  
ADAMTS18  
ADAMTS2  
ADAMTS20  
ADAMTS3  
ADAMTS6  
ADAMTSL2  
ADAP1  
ADCY10P1  
ADCY2  
ADGRA3  
ADGRB1  
ADGRG5  
ADGRL3  
ADGRV1  
AEBP1  
AF186192.5  
AFF2  
AGBL2

AGPAT4  
AJUBA  
ALCAM  
ALDH1L2  
ALK  
ALMS1  
ALOX12P2  
AMBP  
AMER2  
AMH  
AMOT  
AMPD2  
AMTN  
AMZ2P1  
ANKRD10-IT1  
ANKRD13B  
ANKRD18DP  
ANKRD18EP  
ANKRD36BP1  
ANKRD36BP2  
ANKRD45  
ANOS1  
ANTXR1  
ANXA3  
AP000322.53  
AP000473.8  
AP000662.4  
AP000688.29  
APAF1  
APBA2  
APCDD1L-AS1  
APCDD1L  
APH1B  
APP  
AQP10  
ARHGAP29  
ARHGAP33  
ARHGEF16  
ARHGEF19  
ARHGEF2  
ARHGEF25  
ARHGEF26  
ARID3B  
ARID3C  
ARL15  
ARL3  
ARMC9  
ARMCX2  
ASCL4  
ASPM  
ASPN  
ATAD5  
ATAT1  
ATM  
ATP2C2  
ATP7B

ATP8A2  
ATP8B2  
AVIL  
AZIN2  
B3GALNT1  
B3GALT5-AS1  
B4GALNT3  
B4GALNT4  
BACH2  
BAIAP2-AS1  
BAP1  
BASP1  
BBS4  
BCAM  
BCAR3  
BCL11B  
BCL9  
BCO1  
BEND3  
BEND5  
BEND6  
BEX1  
BEX2  
BEX3  
BGN  
BHLHB9  
BHLHE41  
BICC1  
BICD1  
BIN1  
BIVM  
BLM  
BMF  
BMI1  
BMP1  
BMPR1A  
BMPR1APS1  
BMPR1APS2  
BMPR2  
BNC1  
BNC2  
BOK  
BRCA1  
BRCA2  
BRD3  
BRIP1  
BRSK1  
BSN  
BST2  
BTN2A2  
BTN2A3P  
BTN3A1  
BUB1B  
BX322557.10  
C10orf99  
C11orf84

C11orf95  
C12orf54  
C14orf132  
C14orf180  
C16orf74  
C16orf87  
C17orf80  
C18orf54  
C1QTNF1  
C1QTNF6  
C1RL-AS1  
C1orf115  
C1orf228  
C20orf96  
C21orf58  
C21orf62  
C21orf91  
C22orf29  
C2CD3  
C2orf71  
C2orf81  
C3orf36  
C3orf67  
C4orf46  
C5orf38  
C6orf48  
C7orf31  
CABLES1  
CABP1  
CACNA1B  
CACNA2D2  
CACNA2D3  
CACNB3  
CACNG4  
CADM1  
CALCB  
CALD1  
CAMK2G  
CAMK4  
CAND2  
CARD16  
CASC1  
CASC15  
CASC2  
CASC9  
CASD1  
CBFA2T3  
CBLB  
CBX1  
CBX2  
CBX3  
CBX8  
CCDC102A  
CCDC102B  
CCDC114  
CCDC122

CCDC14  
CCDC144A  
CCDC144B  
CCDC144NL-AS1  
CCDC150  
CCDC151  
CCDC152  
CCDC18-AS1  
CCDC191  
CCDC24  
CCDC30  
CCDC39  
CCDC40  
CCDC77  
CCDC89  
CCKBR  
CCNB1IP1  
CCND2  
CCNE2  
CCR2  
CCR5  
CD177  
CD24P4  
CD79A  
CDC25B  
CDC25C  
CDC7  
CDCA7  
CDCA7L  
CDH11  
CDH13  
CDH22  
CDH24  
CDH3  
CDH8  
CDHR3  
CDK1  
CDK14  
CDK19  
CDK20  
CDK5R1  
CELF2  
CENPF  
CENPJ  
CENPK  
CENPO  
CENPV  
CEP128  
CEP135  
CEP162  
CEP170  
CEP290  
CEP41  
CEP55  
CEP57  
CEP95

CERKL  
CFAP221  
CFAP43  
CFAP44  
CFAP69  
CFAP70  
CHCHD7  
CHD3  
CHD6  
CHEK1  
CHGA  
CHIT1  
CHKA  
CHML  
CHODL  
CHRD  
CHRD12  
CHRN2  
CHST2  
CHSY1  
CIT  
CLASP1  
CLCN2  
CLDN1  
CLDN16  
CLDN19  
CLDN6  
CLEC2A  
CLIP3  
CLUAP1  
CMAHP  
CMKLR1  
CNIH2  
CNIH3  
CNNM4  
CNTLN  
CNTN4  
CNTN6  
CNTRL  
COL10A1  
COL11A1  
COL12A1  
COL14A1  
COL18A1  
COL1A1  
COL1A2  
COL26A1  
COL27A1  
COL2A1  
COL3A1  
COL4A1  
COL4A2  
COL4A5  
COL5A1  
COL5A2  
COL6A1

COL6A2  
COL6A3  
COL6A5  
COL7A1  
COL9A2  
CPA3  
CPAMD8  
CPSF1  
CPXM1  
CPZ  
CRABP1  
CREB3L4  
CREB5  
CRIPAK  
CRISPLD1  
CRNN  
CRYL1  
CSMD1  
CSPG4  
CSPG4P11  
CSRNP3  
CTA-445C9.14  
CTB-36H16.2  
CTBP1  
CTC-499J9.1  
CTC-523E23.1  
CTC-524C5.2  
CTD-2008L17.1  
CTD-2008L17.2  
CTD-2081C10.7  
CTD-2196E14.9  
CTD-2245F17.3  
CTD-2269F5.1  
CTD-2368P22.1  
CTD-2554C21.2  
CTD-2561J22.2  
CTD-2561J22.5  
CTDSPL2  
CTHRC1  
CTNNB1  
CTPS2  
CTSV  
CTTNBP2  
CTXN1  
CUL7  
CUX2  
CXADR  
CXCL10  
CXCL11  
CXCL13  
CXCL9  
CXXC4  
CYFIP2  
CYGB  
CYP27B1  
CYP2D6

CYP2W1  
CYP4F11  
CYR1  
DAPK1  
DAPL1  
DBF4B  
DBN1  
DBNDD1  
DCAF16  
DCAF4  
DCC  
DCDC1  
DCHS1  
DCP2  
DCUN1D2  
DDHD2  
DDX25  
DDX60  
DEFB4A  
DEFB4B  
DENND2A  
DERL3  
DFNA5  
DGCR5  
DGKI  
DIO2  
DIRAS1  
DIRAS2  
DKFZP434I0714  
DKK2  
DLEU2  
DLG4  
DLGAP3  
DLGAP5  
DLX1  
DLX2  
DMD  
DMXL2  
DNA2  
DNAAF1  
DNAH14  
DNAH6  
DNAJC12  
DNAJC18  
DNASE1  
DNM1  
DNM1P35  
DNMT3A  
DPP4  
DPY19L1  
DPY19L3  
DPYSL2  
DPYSL5  
DRAXIN  
DRC3  
DRD1



DRD2  
DSC2  
DSCC1  
DSG2  
DTL  
DTX3  
DUOX2  
DUSP10  
DUXAP10  
DUXAP8  
DUXAP9  
DYDC2  
DYNC2H1  
DYNC2LI1  
DYRK2  
DZIP3  
E2F5  
ECE1  
ECT2  
EDA2R  
EDAR  
EDARADD  
EDIL3  
EDN1  
EDN2  
EFCAB1  
EFCAB12  
EFCAB13  
EFCAB7  
EFEMP2  
EFHC1  
EFNB3  
EGFLAM  
EHMT2  
EID3  
EIF2AK2  
ELFN1  
ELOVL2  
EMBP1  
EME1  
EMID1  
EML5  
ENPP5  
ENTPD6  
EPB41L1  
EPCAM  
EPHA10  
EPHB4  
EPSTI1  
EPX  
ERBB2  
ERC2  
ERCC4  
ERCC6L2  
ERF  
ERP27

ESM1  
ETNK2  
ETV5  
EVA1A  
EXO5  
EXTL2  
F2R  
F2RL2  
FAAH  
FAM109B  
FAM111B  
FAM117B  
FAM157A  
FAM157C  
FAM161A  
FAM167A  
FAM168A  
FAM169A  
FAM171A2  
FAM172A  
FAM184B  
FAM20A  
FAM20C  
FAM221A  
FAM222A  
FAM224A  
FAM224B  
FAM227A  
FAM229B  
FAM30A  
FAM41C  
FAM64A  
FAM66C  
FAM76B  
FAM90A1  
FAM92A  
FANCC  
FANCD2  
FANCF  
FANCI  
FAP  
FAR1  
FAR2P1  
FARP1  
FAT3  
FBN2  
FBN3  
FBXL2  
FBXO17  
FBXO30  
FBXO41  
FBXO5  
FCGR1A  
FCGR3A  
FCRL5  
FERMT1

FGF12  
FGF13  
FGF19  
FGFR2  
FGFRL1  
FHOD3  
FKBP10  
FKBP7  
FKBP9P1  
FLNA  
FLRT1  
FLRT2  
FMNL3  
FMO2  
FN1  
FNBP1L  
FNDC1  
FOXD2-AS1  
FOXD2  
FOXE1  
FOXI3  
FOXL1  
FOXM1  
FOXO6  
FRAS1  
FREM2  
FRG2FP  
FRK  
FSIP2  
FSTL1  
FUT8  
FYN  
FZD10-AS1  
FZD2  
FZD6  
FZD7  
FZD8  
GABBR1  
GABPB1-AS1  
GABRA1  
GABRA3  
GABRA5  
GABRB3  
GABRG2  
GABRR1  
GADD45G  
GAK  
GALNT11  
GALNT15  
GALNT16  
GALNT9  
GAREM2  
GAS2  
GATS  
GBAP1  
GBP5

GBX2  
GCCGR  
GDAP1  
GDF11  
GDPD5  
GET4  
GINS1  
GINS2  
GINS4  
GJA3  
GJB2  
GJB6  
GJC1  
GLCC1  
GLI1  
GLI2  
GLI3  
GLP1R  
GMPR  
GNAZ  
GNG4  
GNG7  
GNPDA1  
GOLGA6L4  
GOLGA6L5P  
GOLIM4  
GPC2  
GPC3  
GPC4  
GPHA2  
GPR137C  
GPR158  
GPR161  
GPR173  
GPR78  
GPRASP2  
GPX8  
GRAMD1B  
GRHL2  
GRIK2  
GRIK3  
GRIP1  
GRM1  
GRM4  
GSDMB  
GTF2IP4  
GTF2IRD1  
GTF2IRD2  
GTF2IRD2B  
GTSE1  
GZMA  
GZMK  
H19  
H3F3AP6  
HACD4  
HACE1

HAP1  
HAPLN1  
HAS3  
HAUS7  
HCAR1  
HDAC2  
HECW2  
HELLS  
HEPH  
HERC2P3  
HEYL  
HFM1  
HHIP-AS1  
HHIP  
HJURP  
HLA-DOA  
HLA-DPB2  
HLF  
HLTF  
HMCN1  
HMGA2  
HMGB3  
HN1  
HOXC4  
HR  
HRAT92  
HRNR  
HS2ST1  
HS3ST1  
HSDL1  
HSF2BP  
HSPB3  
HTRA1  
HUNK  
HYDIN  
ICA1L  
IDO1  
IFI6  
IFIT3  
IFT140  
IFT172  
IFT22  
IFT80  
IFT81  
IFT88  
IGF1R  
IGF2BP2  
IGFBP2  
IGFBP5  
IGFBP7-AS1  
IGFBP7  
IGHA1  
IGHA2  
IGHG1  
IGHG2  
IGHG3

IGHG4  
IGHGP  
IGHM  
IGHV3-23  
IGKV1-5  
IGKV3-20  
IGKV4-1  
IGLC2  
IGLC3  
IGLV1-44  
IGLV3-19  
IGLV3-21  
IGLV6-57  
IGSF1  
IGSF11  
IGSF9  
IL17RD  
IL17RE  
IL23A  
IL31RA  
ILF3  
INHBA  
INHBC  
INHBE  
INPP5F  
INPPL1  
IPCEF1  
IQCA1  
IQCE  
IQGAP3  
IRF8  
IRS1  
IRS4  
IRX2  
ISYNA1  
ITGA11  
ITGA4  
ITGB1P1  
ITGB8  
ITPK1  
ITPKA  
ITPR3  
JAG1  
JAK2  
JAKMIP2  
JCHAIN  
JDP2  
JPH3  
KALRN  
KBTBD6  
KC6  
KCNA3  
KCNC3  
KCND1  
KCNE1  
KCNE3

KCNH3  
KCNH8  
KCNIP1  
KCNJ5  
KCNMB2  
KCNQ3  
KCNQ4  
KCNS3  
KCNU1  
KDELC1  
KDM6A  
KIAA0040  
KIAA0753  
KIAA1024  
KIAA1211  
KIAA1524  
KIAA1549  
KIAA1549L  
KIAA1683  
KIDINS220  
KIF11  
KIF12  
KIF14  
KIF15  
KIF18A  
KIF18B  
KIF20A  
KIF23  
KIF24  
KIF26A  
KIF3C  
KIF4A  
KIF5A  
KIF7  
KIFC1  
KIRREL  
KIRREL2  
KIRREL3  
KISS1  
KITLG  
KLF12  
KLHL23  
KLHL3  
KLHL5  
KNL1  
KNTC1  
KPNA5  
KRBA1  
KRT16P6  
KRT17  
KRT42P  
KRT6C  
KRT8  
L3MBTL3  
LAMA5  
LAMB1

LAMB3  
LAMC1  
LAMC2  
LAMP5  
LASP1  
LAYN  
LCA5  
LDOC1L  
LEF1  
LFNG  
LGALS8  
LGR4  
LGR5  
LGR6  
LHFPL3-AS1  
LHX2  
LHX4  
LIFR-AS1  
LIFR  
LIMD2  
LINC00092  
LINC00094  
LINC00205  
LINC00265  
LINC00303  
LINC00342  
LINC00511  
LINC00519  
LINC00640  
LINC00641  
LINC00648  
LINC00649  
LINC00665  
LINC00668  
LINC00672  
LINC00858  
LINC00865  
LINC00898  
LINC00899  
LINC00926  
LINC00964  
LINC01001  
LINC01089  
LINC01096  
LINC01134  
LINC01249  
LINC01355  
LINC01410  
LINC01560  
LINC01561  
LINC01579  
LINC01581  
LINC01748  
LINC01833  
LINC01836  
LINC01839



LINC01876  
LINC01963  
LINC01980  
LINC02167  
LINC02185  
LINGO1  
LIPG  
LIX1  
LMNTD2  
LMO3  
LMO4  
LMX1B  
LOXL2  
LPCAT1  
LPCAT2  
LRIG3  
LRP2  
LRP4  
LRP8  
LRRC27  
LRRC49  
LRRC6  
LRRC61  
LRRCC1  
LRRIQ1  
LRRN1  
LRRTM4  
LRTOMT  
LTBP1  
LTK  
LUM  
LZTFL1  
MAGEA4  
MAGED1  
MAGED2  
MAGEE1  
MAGEE2  
MAGEH1  
MAGI1  
MALRD1  
MAP10  
MAP3K12  
MAP9

1-Mar

11-Mar

MARCKSL1  
MARK1  
MASP2  
MBOAT1  
MBTD1  
MCM10  
MCM3AP-AS1  
MCM6  
MCM7  
MDGA1  
MDH1B

MDK  
MDM1  
ME2  
MED12  
MEGF6  
MELK  
MEOX1  
MET  
METAP1D  
MEX3A  
MEX3B  
MEX3C  
MFAP2  
MGAT5  
MIB1  
MICAL2  
MICAL3  
MICU3  
MIR4477B  
MIR503HG  
MIR99AHG  
MISP  
MKL2  
MLC1  
MLF1  
MLLT11  
MMD  
MME  
MMP1  
MMP10  
MMP11  
MMP13  
MMP14  
MMP16  
MMP9  
MOK  
MORN1  
MORN4  
MOV10L1  
MPDZ  
MPPED1  
MROH7  
MS4A1  
MSANTD4  
MSH6  
MSI1  
MSI2  
MSL3P1  
MST1L  
MST1P2  
MT1F  
MTA1  
MTBP  
MTMR11  
MTMR7  
MTSS1

MUM1L1  
MX2  
MXRA5  
MYBL2  
MYCN  
MYCNOS  
MYO15A  
MYO15B  
MYO1B  
MYO3B  
MZB1  
N4BP2  
NAP1L3  
NASP  
NAT14  
NAV2  
NBPF1  
NCAM1  
NCAM2  
NCKAP5  
NCKAP5L  
NCOA2  
NDC80  
NDN  
NECTIN3  
NEDD4L  
NEFH  
NEK2  
NEMP1  
NF1  
NFAM1  
NHS  
NID1  
NIN  
NINJ2  
NINL  
NKG7  
NKTR  
NLGN2  
NLRC3  
NME7  
NMNAT2  
NOL4L  
NOX4  
NPHP1  
NPNT  
NPTX2  
NRBP2  
NREP  
NRP2  
NRTN  
NRXN2  
NRXN3  
NT5DC2  
NTM  
NTN1

NTRK3  
NUAK1  
NUDT10  
NUDT11  
NUF2  
NUMA1  
NUSAP1  
NUTM2D  
NXN  
NXPE3  
NYAP1  
NYNRIN  
ODF2L  
OGDHL  
OGFRL1  
OLFM4  
ORAI2  
ORC6  
OSBPL3  
OSBPL7  
P3H1  
P3H2  
P4HA3  
PABPC1L  
PABPC4L  
PACRG  
PAFAH1B3  
PALM  
PALM3  
PAMR1  
PAPLN  
PAPPA  
PARK2  
PARP1  
PARP11  
PARP4  
PARPBP  
PASK  
PATZ1  
PAWR  
PAX6  
PAXBP1  
PAXIP1-AS2  
PBK  
PCBP3  
PCDH11X  
PCDH11Y  
PCDH8  
PCDHB10  
PCDHB12  
PCDHB14  
PCDHB2  
PCDHB8  
PCDHB9  
PCDHGB1  
PCDHGB2

PCDHGC4  
PCMTD2  
PCNT  
PCYOX1L  
PCYT1B  
PDE6B  
PDE7A  
PDGFA  
PDGFRB  
PDIA4  
PEAK1  
PELI2  
PFN2  
PGAP1  
PGBD1  
PGF  
PHC1  
PHC1P1  
PHC2  
PHEX  
PHF21A  
PHF24  
PHF6  
PHLDB1  
PIAS3  
PIFO  
PITX2  
PIWIL2  
PKN1  
PLAG1  
PLCE1  
PLCH1  
PLD6  
PLEKHA7  
PLEKHG2  
PLEKHG4B  
PLEKHH2  
PLEKHO1  
PLPP4  
PLPPR1  
PLXDC1  
PNMA1  
PNMA2  
POGZ  
POLI  
POSTN  
POT1-AS1  
POT1  
POU2AF1  
POU6F2  
PPM1E  
PPME1  
PPP1R26-AS1  
PRAME  
PRCD  
PRDM1

PRDM11  
PRDM5  
PRIMA1  
PRKAR1B  
PRKD3  
PRKG2  
PRKX  
PROX1  
PRR3  
PRTFDC1  
PSD  
PSD3  
PSIP1  
PTBP2  
PTCH1  
PTCH2  
PTK7  
PTPN14  
PTPRN2  
PTPRT  
PTPRU  
PWAR6  
PXDN  
PXYLP1  
PYCR2  
PYGO1  
QRICH2  
RAB34  
RABL2A  
RAC3  
RAD51AP1  
RAG1  
RAMP1  
RARA  
RARRES2  
RASL11B  
RBBP4  
RBFOX1  
RBFOX3  
RBM4B  
RBP2  
RCBTB1  
RCC2  
RCN2  
RCOR2  
REC8  
RFC3  
RFPL1S  
RFX3  
RGMA  
RGMB  
RGS4  
RGS6  
RHBDD2  
RHOU  
RIC8B

RIMKLB  
RIMS2  
RMI2  
RND2  
RNF152  
RNF183  
RNF38  
ROBO1  
RP1-152L7.5  
RP1-228H13.5  
RP1-283E3.4  
RP1-78O14.1  
RP11-111M22.2  
RP11-119F7.5  
RP11-129H15.1  
RP11-1391J7.1  
RP11-13K12.2  
RP11-13P5.2  
RP11-140I16.3  
RP11-145E17.2  
RP11-150C16.1  
RP11-157P1.4  
RP11-159D12.2  
RP11-161I6.2  
RP11-180I4.4  
RP11-182J1.14  
RP11-186F10.2  
RP11-197K6.1  
RP11-221N13.3  
RP11-244M2.1  
RP11-250B2.5  
RP11-255G12.2  
RP11-271K11.5  
RP11-276H19.2  
RP11-283I3.6  
RP11-286B14.1  
RP11-293M10.6  
RP11-29H23.5  
RP11-310K10.1  
RP11-343L5.2  
RP11-34P13.13  
RP11-355F16.1  
RP11-359E10.1  
RP11-366L20.2  
RP11-379B8.1  
RP11-382A20.3  
RP11-395I6.3  
RP11-408B11.2  
RP11-424C20.2  
RP11-435O5.4  
RP11-436D23.1  
RP11-445O3.3  
RP11-448G15.3  
RP11-44F21.5  
RP11-456K23.1  
RP11-457M11.5

RP11-46D6.1  
RP11-477D19.2  
RP11-486L19.2  
RP11-48B3.4  
RP11-496I9.1  
RP11-521B24.3  
RP11-530N7.3  
RP11-536O18.1  
RP11-545I5.3  
RP11-54O7.1  
RP11-60A24.3  
RP11-60A8.1  
RP11-620J15.3  
RP11-624L4.1  
RP11-657O9.1  
RP11-696N14.1  
RP11-715J22.6  
RP11-71H17.7  
RP11-758M4.4  
RP11-76C10.5  
RP11-80H8.4  
RP11-813I20.2  
RP11-815I9.4  
RP11-83M16.3  
RP11-83M16.4  
RP11-83M16.6  
RP11-848P1.9  
RP11-85G21.3  
RP11-85O21.2  
RP11-85O21.5  
RP11-87E22.2  
RP11-8L2.1  
RP11-902B17.1  
RP11-945C19.4  
RP11-981G7.6  
RP3-368A4.6  
RP3-399L15.3  
RP3-467N11.1  
RP3-512B11.3  
RP4-555D20.2  
RP4-665J23.1  
RP4-669L17.10  
RP4-734C18.1  
RP4-800G7.2  
RP5-1050E16.2  
RP6-191P20.4  
RP6-24A23.3  
RP6-24A23.7  
RPGRIP1L  
RPL32P3  
RPSAP52  
RRAGB  
RRN3P1  
RSPH4A  
RSRC1  
RTKN2



RTP4  
RUNX1T1  
RWDD2A  
RYBP  
RZR2  
SACS  
SALL2  
SAMD11  
SAMD15  
SAMD5  
SAMD9  
SAXO2  
SBK1  
SCAMP5  
SCARA3  
SCD5  
SCG5  
SCN2A  
SCN2B  
SCN3B  
SCN5A  
SCN8A  
SCNN1G  
SCUBE1  
SCUBE3  
SDC2  
SDHAP3  
SEC61A2  
SEMA3B  
SEMA3D  
SEMA4F  
SEMA6A-AS1  
SEMA6A  
SEMA6C  
SENP7

3-Sep

SERPINH1  
SETBP1  
SEZ6L2  
SFRP2  
SFRP5  
SGIP1  
SGO2  
SGPP1  
SGSM1  
SH2B2  
SH3BP2  
SH3GL3  
SH3KBP1  
SHANK2  
SHCBP1  
SHISA2  
SHOX2  
SHROOM2  
SIK3  
SIX4

SKA1  
SKA2  
SKA3  
SKIL  
SKP2  
SLAMF7  
SLAMF8  
SLC13A3  
SLC16A2  
SLC16A3  
SLC16A9  
SLC19A1  
SLC1A1  
SLC1A4  
SLC22A1  
SLC25A29  
SLC26A2  
SLC27A5  
SLC2A13  
SLC35E2B  
SLC38A5  
SLC39A14  
SLC39A4  
SLC44A5  
SLC4A3  
SLC5A9  
SLC6A1  
SLC6A11  
SLC6A12  
SLC6A4  
SLC6A6  
SLC6A9  
SLC7A1  
SLC7A2  
SLC7A3  
SLC7A5  
SLC7A8  
SLC9A6  
SLCO1A2  
SLCO2A1  
SLIT3  
SLITRK2  
SLITRK6  
SMARCA1  
SMARCC1  
SMARCD3  
SMARCE1  
SMIM11A  
SMKR1  
SMO  
SMPD4P1  
SMS  
SNAP25  
SNHG14  
SNX32  
SOAT2

SOBP  
SOCS1  
SOCS2-AS1  
SOGA1  
SORCS2  
SORL1  
SOSTDC1  
SOX11  
SOX12  
SOX13  
SOX18  
SOX4  
SPA17  
SPAG17  
SPAG5  
SPARC  
SPAST  
SPATA17  
SPATA31E1  
SPATA33  
SPDL1  
SPECC1  
SPEG  
SPIN4  
SPON2  
SPP1  
SPRR3  
SPRY4  
SPSB4  
SPTB  
SRSF12  
SSBP3  
SSPN  
SSPO  
SSTR2  
ST8SIA2  
STAC2  
STAG3  
STARD4-AS1  
STC2  
STIL  
STIM2  
STK31  
STK36  
STMN1  
STMN3  
STON1  
STON2  
STRC  
STX1B  
STXBP5L  
SULF2  
SULT1E1  
SULT4A1  
SUPT3H  
SV2A

SVBP  
SYCP2L  
SYNC  
SYNGAP1  
SYNJ1  
SYNPO  
SYNPR  
SYT14  
TACC3  
TAF1C  
TAGLN3  
TBATA  
TBC1D1  
TBC1D32  
TBX1  
TBX19  
TCEA2  
TCEAL5  
TCEAL9  
TCF19  
TCF3  
TCF7L1  
TCL6  
TCN1  
TCTN1  
TCTN2  
TDO2  
TDRD5  
TDRP  
TEAD2  
TEKT2  
TENM2  
TET1  
TEX9  
TFAP2B  
TGFB3  
TGFB1  
TGIF2  
TGM3  
THNSL1  
THPO  
THRA  
TIA1  
TIAM1  
TIGD1  
TIGD2  
TIGD7  
TLE2  
TLL1  
TMCO3  
TMEM106C  
TMEM117  
TMEM119  
TMEM132A  
TMEM136  
TMEM14A

TMEM167A  
TMEM179  
TMEM19  
TMEM200C  
TMEM206  
TMEM231  
TMEM257  
TMEM263  
TMEM44  
TMEM51-AS1  
TMEM64  
TMEM65  
TMEM67  
TMEM94  
TMEM98  
TMPO-AS1  
TMPO  
TMPRSS11D  
TMSB15A  
TMSB15B  
TMTC1  
TMTC4  
TNC  
TNFSF10  
TNKS  
TNRC6C  
TNS3  
TONSL  
TOP2A  
TOX  
TOX2  
TP53BP2  
TP53INP1  
TP73  
TPGS2  
TPT1-AS1  
TRABD2B  
TRAF3IP3  
TRAM1L1  
TRAM2-AS1  
TRAM2  
TRIB2  
TRIM45  
TRIM46  
TRIM5  
TRIM9  
TRO  
TSHR  
TSNAXIP1  
TSPAN12  
TSPAN18  
TSPAN2  
TSPAN4  
TSPAN7  
TSPY26P  
TSPYL4

TSPYL5  
TTC21A  
TTC25  
TTC28-AS1  
TTC30B  
TTC3P1  
TTK  
TTYH3  
TUB  
TUBA1A  
TUBB  
TUBB7P  
TUBB8P12  
TUBB8P8  
TUBBP5  
TUBGCP4  
TUSC3  
TXNDC16  
UBE2Q2P1  
UBL3  
UBTD2  
UBXN11  
UCP2  
UGP2  
UGT3A2  
UNC119B  
USH1C  
USP11  
USP49  
USP51  
UST  
UVSSA  
UXS1  
VANGL2  
VASH2  
VAT1L  
VCAN  
VCX  
VGLL4  
VHL  
VIPR1  
VPS37D  
VSIG1  
VSTM5  
VWA2  
WASF1  
WDHD1  
WDPCP  
WDR17  
WDR19  
WDR35  
WDR54  
WDR6  
WDR78  
WDR90  
WDR93

WFDC1  
WFIKKN2  
WISP1  
WLS  
WNK1  
WNK3  
WNK4  
WNT2  
WNT5A  
WNT6  
WNT7B  
WNT9A  
XAF1  
XCL1  
XPR1  
XRCC2  
XXyac-YM21GA2.7  
XXyac-YR29IB3.1  
YEATS2  
YJEFN3  
YPEL1  
ZAP70  
ZBED6CL  
ZBED8  
ZBED9  
ZBTB10  
ZBTB12  
ZC3H12B  
ZC3HAV1L  
ZC4H2  
ZCWPW1  
ZDBF2  
ZDHC15  
ZDHC17  
ZFC3H1  
ZFP1  
ZFP14  
ZFP30  
ZFP37  
ZFP69  
ZFP69B  
ZFP82  
ZGRF1  
ZIK1  
ZKSCAN2  
ZKSCAN4  
ZKSCAN7  
ZKSCAN8  
ZMIZ1  
ZMYM2  
ZMYM3  
ZMYM4  
ZNF112  
ZNF114  
ZNF124  
ZNF135

ZNF136  
ZNF137P  
ZNF14  
ZNF140  
ZNF154  
ZNF184  
ZNF195  
ZNF22  
ZNF225  
ZNF232  
ZNF233  
ZNF239  
ZNF253  
ZNF257  
ZNF260  
ZNF28  
ZNF281  
ZNF285  
ZNF286A  
ZNF286B  
ZNF292  
ZNF3  
ZNF300  
ZNF302  
ZNF311  
ZNF320  
ZNF333  
ZNF334  
ZNF337  
ZNF345  
ZNF347  
ZNF354C  
ZNF362  
ZNF37A  
ZNF382  
ZNF385C  
ZNF391  
ZNF397  
ZNF404  
ZNF415  
ZNF417  
ZNF418  
ZNF419  
ZNF420  
ZNF425  
ZNF432  
ZNF439  
ZNF445  
ZNF446  
ZNF454  
ZNF469  
ZNF470  
ZNF471  
ZNF48  
ZNF480  
ZNF486



ZNF491  
ZNF492  
ZNF501  
ZNF503-AS2  
ZNF512  
ZNF519  
ZNF525  
ZNF528-AS1  
ZNF528  
ZNF529  
ZNF532  
ZNF542P  
ZNF547  
ZNF549  
ZNF551  
ZNF555  
ZNF556  
ZNF558  
ZNF559  
ZNF566  
ZNF567  
ZNF568  
ZNF571-AS1  
ZNF572  
ZNF578  
ZNF583  
ZNF585A  
ZNF585B  
ZNF594  
ZNF596  
ZNF599  
ZNF605  
ZNF606  
ZNF607  
ZNF610  
ZNF616  
ZNF618  
ZNF623  
ZNF624  
ZNF626  
ZNF627  
ZNF641  
ZNF660  
ZNF664  
ZNF665  
ZNF667  
ZNF670-ZNF695  
ZNF671  
ZNF677  
ZNF678  
ZNF682  
ZNF697  
ZNF699  
ZNF701  
ZNF702P  
ZNF704

ZNF711  
ZNF713  
ZNF730  
ZNF738  
ZNF74  
ZNF75A  
ZNF766  
ZNF772  
ZNF775  
ZNF780A  
ZNF780B  
ZNF785  
ZNF793  
ZNF812P  
ZNF813  
ZNF814  
ZNF816  
ZNF829  
ZNF83  
ZNF84  
ZNF85  
ZNF853  
ZNF879  
ZNF880  
ZNF883  
ZNF90  
ZNF92  
ZNF93  
ZNF98  
ZSCAN12  
ZSCAN18  
ZSCAN2  
ZSCAN23  
ZSCAN26  
ZSCAN30  
ZWILCH  
ZWINT

**Supplementary Table 2-6. BCC-DOWN-mRNA**

AACS  
AADACL3  
AATBC  
ABCA10  
ABCA12  
ABCA3  
ABCA4  
ABCA8  
ABCC3  
ABHD12B  
ABHD5  
ABHD6  
ABLIM2  
AC006129.1  
AC008592.8  
AC090616.2  
ACAA1  
ACACB  
ACAD9  
ACADL  
ACADVL  
ACAT1  
ACAT2  
ACER1  
ACKR1  
ACO1  
ACOT1  
ACOT2  
ACOT4  
ACOX2  
ACP6  
ACSBG1  
ACSL1  
ACSL5  
ACSM3  
ACSM6  
ACSS2  
ACSS3  
ACTA1  
ACTC1  
ACTG2  
ADAM15  
ADAMTS1  
ADAMTS15  
ADAMTS4  
ADCK1  
ADGRD1  
ADGRG2  
ADGRG6  
ADH1B  
ADHFE1  
ADIPOQ  
ADIRF  
ADM  
ADORA1

ADORA2B  
ADRB1  
ADRB2  
ADTRP  
AGPAT1  
AGPAT2  
AGPAT3  
AIM1  
AIM1L  
AK4  
AKAP12  
AKR1C1  
AKR1C2  
AKR1C3  
AL450992.2  
ALDH1A1  
ALDH1L1  
ALDH2  
ALDH3A1  
ALDH3B2  
ALDH4A1  
ALDH9A1  
ALKAL2  
ALOX15B  
ALPK3  
ALS2CL  
AMIGO2  
ANGPTL1  
ANGPTL4  
ANGPTL5  
ANGPTL7  
ANKRD22  
ANKRD37  
ANKRD9  
ANO1  
AOC3  
AOX1  
APMAP  
APOC1  
APOD  
APOE  
APOLD1  
AQP3  
AQP5  
AQP7  
AQP7P1  
AQP9  
ARC  
AREG  
ARHGAP20  
ARHGAP40  
ARL4D  
ASB2  
ATF3  
ATG9B  
ATOH8

ATP11A  
ATP1A2  
ATP2A3  
ATP5D  
ATP6V0A4  
ATP6V1B1  
ATP6V1C2  
ATP8A1  
AVPI1  
AWAT1  
AWAT2  
AZGP1  
B4GALNT2  
BAIAP3  
BAMBI  
BBOX1  
BCAP29  
BCAT2  
BCL3  
BCL6  
BDH1  
BDKRB2  
BHLHE40  
BICDL1  
BICDL2  
BLVRB  
BRI3BP  
BSPRY  
BTD  
BTG2  
C11orf96  
C1QTNF12  
C1orf122  
C1orf210  
C2CD2  
C2orf40  
C2orf72  
C3  
C3orf52  
C5orf46  
C6orf132  
C7  
C8orf4  
C9orf152  
CA12  
CA2  
CA6  
CADM2  
CADM3  
CALML3  
CAMSAP3  
CAPN13  
CARD10  
CARD18  
CASP1P2  
CASQ2

CBLN2  
CCDC129  
CCDC69  
CCDC85B  
CCER2  
CCL17  
CCL2  
CCSER1  
CD1A  
CD200R1  
CD207  
CD300LG  
CD36  
CD44  
CD55  
CD82  
CDC42EP1  
CDHR1  
CDKN1A  
CDO1  
CEACAM1  
CEACAM6  
CEACAM7  
CEBPD  
CERS3  
CES1  
CFD  
CFTR  
CH25H  
CHADL  
CHCHD10  
CHD7  
CHDH  
CHI3L1  
CHI3L2  
CHMP4C  
CHP1  
CHP2  
CHRDL1  
CIDEA  
CIDEA  
CIDEA  
CILP  
CKB  
CKMT1A  
CKMT2  
CLCA2  
CLCA4  
CLDN10  
CLDN4  
CLDN5  
CLDN7  
CLDN8  
CLEC3B  
CLMN  
CLMP  
CLSTN2

CLSTN3  
CLTB  
CLYBL  
CNDP1  
CNKSR1  
CNTFR  
CNTNAP3  
COBL  
COCH  
COMTD1  
CORO2A  
COX7A1  
COX8A  
CPEB2  
CPED1  
CPM  
CRACR2A  
CRACR2B  
CRAT  
CREG1  
CRISP3  
CRLF1  
CRYAB  
CSF3  
CSRNP1  
CSRNP2  
CST6  
CSTB  
CTD-2017D11.1  
CTD-2228K2.7  
CTD-2538C1.2  
CTGF  
CTH  
CTNND2  
CTSD  
CWH43  
CXCL2  
CYB5A  
CYB5R2  
CYP1A1  
CYP1B1-AS1  
CYP1B1  
CYP27A1  
CYP3A5  
CYP4B1  
CYP4F12  
CYP4F22  
CYP4F8  
CYR61  
DAPK2  
DBI  
DCD  
DDO  
DEFB1  
DEGS2  
DENND3

DES  
DGAT2  
DGAT2L6  
DGCR6  
DHCR24  
DHCR7  
DHRS2  
DHRS9  
DIRAS3  
DLG2  
DLGAP1-AS5  
DLL1  
DMBX1  
DNAH17  
DNAH8  
DNAJA4  
DNAJC15  
DNASE1L2  
DNER  
DPYD  
DSG1  
DSG4  
DTX2  
DUSP1  
DUSP2  
DUSP4  
DUSP5  
DUSP6  
DUSP8  
EBP  
ECH1  
ECI1  
EEF1A2  
EFNA5  
EFNB2  
EGLN3  
EGR1  
EGR2  
ELF5  
ELOVL1  
ELOVL3  
ELOVL4  
ELOVL5  
EMILIN3  
EML2  
EMP1  
EN1  
ENDOU  
ENPP4  
EPAS1  
EPA2  
EPHB1  
EPHX3  
ERBB4  
ERRFI1  
ERV3-1



ESPN  
ESRRA  
ESRRG  
ETFA  
ETFDH  
ETS2  
EVA1C  
EVPL  
EXPH5  
EYA2  
F2RL3  
F5  
FA2H  
FABP4  
FABP7  
FABP9  
FADS1  
FADS2  
FADS6  
FAM107A  
FAM166B  
FAM180B  
FAM189A2  
FAM213A  
FAM46B  
FAM83F  
FAR2  
FAS  
FASN  
FBP1  
FBP2  
FBXL16  
FBXW7  
FDPS  
FETUB  
FGD4  
FGF1  
FGF18  
FGF7  
FGFBP1  
FGL2  
FHL5  
FITM2  
FKBP5  
FMO5  
FOS  
FOSB  
FOSL1  
FOXA1  
FOXC1  
FOXI1  
FOXP2  
FOXQ1  
FRG2HP  
FZD4  
G0S2

G6PD  
GABRP  
GADD45A  
GADD45B  
GAL  
GAS2L1  
GATA6  
GATM  
GDPD2  
GFPT2  
GGT6  
GGTA1P  
GHR  
GIPC2  
GJB3  
GK  
GK5  
GLDC  
GLDN  
GLRX  
GLRX2  
GLYATL1  
GLYATL2  
GNA15  
GNAL  
GOT1  
GPAT3  
GPC6  
GPCPD1  
GPD1  
GPR157  
GPR183  
GPR37  
GPRC5A  
GPRC5D  
GPT  
GPX2  
GPX3  
GPX4  
GRB14  
GRHL1  
GRIA2  
GRIA4  
GRIN2A  
GSDFC  
GSN  
GSTA1  
H2AFJ  
HACL1  
HAO2  
HAS1  
HBA1  
HBA2  
HBB  
HBEGF  
HCAR2

HCAR3  
HGD  
HIBCH  
HIST1H1C  
HIST1H2BC  
HK1  
HLA-DQB2  
HLCS  
HMGCR  
HMGCS1  
HMGCS2  
HMOX1  
HOMER2  
HRASLS5  
HRC  
HS3ST6  
HSD11B1  
HSD17B2  
HSD3B1  
HSD3BP2  
HSPA4L  
HSPB7  
HSPB8  
HYAL1  
ICOSLG  
ID1  
ID4  
IDH1  
IDI1  
IER2  
IGFBP6  
IGFL2  
IGFL4  
IGHEP1  
IL12A-AS1  
IL17RC  
IL1RN  
IL20  
IL20RA  
IL20RB  
IL34  
IL6  
IMPA2  
INSIG1  
IPPK  
IQGAP2  
IRS2  
IRX3  
IRX6  
ITGA7  
ITGA8  
ITIH5  
ITPR1  
ITPRIP  
IYD  
JADE1

JPH2  
JUN  
JUNB  
JUND  
KANK4  
KCND3  
KCNJ15  
KCNJ2  
KCNK1  
KCNK5  
KCNK7  
KCNN4  
KIAA0513  
KIAA1211L  
KIAA1456  
KLB  
KLF11  
KLF15  
KLF2  
KLF4  
KLF5  
KLF6  
KLHDC8B  
KLK1  
KLK11  
KRT17P1  
KRT23  
KRT25  
KRT26  
KRT27  
KRT28  
KRT31  
KRT32  
KRT33A  
KRT33B  
KRT34  
KRT35  
KRT38  
KRT39  
KRT4  
KRT71  
KRT72  
KRT73  
KRT74  
KRT77  
KRT79  
KRT81  
KRT82  
KRT83  
KRT86  
KRTAP1-1  
KRTAP1-3  
KRTAP1-5  
KRTAP11-1  
KRTAP16-1  
KRTAP19-1

KRTAP19-5  
KRTAP2-2  
KRTAP2-4  
KRTAP24-1  
KRTAP26-1  
KRTAP3-1  
KRTAP3-2  
KRTAP3-3  
KRTAP4-1  
KRTAP4-12  
KRTAP4-3  
KRTAP4-4  
KRTAP4-6  
KRTAP4-7  
KRTAP4-8  
KRTAP4-9  
KRTAP8-1  
KRTAP9-2  
KRTAP9-3  
KRTAP9-4  
KRTAP9-8  
LDHD  
LDLR  
LEP  
LGALS12  
LGALS3  
LGALS7  
LGALS7B  
LGI3  
LIF  
LIMA1  
LINC01106  
LINC01160  
LINC01485  
LINC01554  
LINC01612  
LINC01698  
LINC02137  
LINC02169  
LIPE  
LIPH  
LIPK  
LONRF3  
LPL  
LRG1  
LRP11  
LRR10B  
LRR2  
LTF  
LVRN  
LY6D  
LY6E  
LY6G6C  
LY86-AS1  
LYG2  
LYPD3

LYVE1  
MACROD1  
MAFF  
MAL2  
MAMDC2  
MANSC1  
MAOA  
MAOB  
MAP2K3  
MAP3K6  
MAP3K8  
MAPK8IP2  
MAPT

1-Mar

MATN2  
MB  
MC5R  
ME1  
ME3  
MECR  
MEDAG  
MEIS2  
MELTF  
MERTK  
METRNL  
METTL7B  
MFAP3L  
MFAP5  
MFSD12  
MFSD2A  
MFSD4A  
MGST1  
MGST2  
MKNK2  
MLXIPL  
MMP7  
MOCOS  
MOCOS1  
MOGAT1  
MOGAT2  
MOXD1  
MPC2  
MPST  
MPV17L  
MPZ  
MRAS  
MSMO1  
MSRB1  
MST1R  
MT-ATP6  
MT-ATP8  
MT-CO1  
MT-CO2  
MT-CO3  
MT-CYB  
MT-ND1

MT-ND2  
MT-ND3  
MT-ND4  
MT-ND4L  
MT-ND6  
MT-RNR1  
MT-RNR2  
MT1A  
MT1M  
MT2A  
MT4  
MTATP6P1  
MTND2P28  
MUC1  
MUC21  
MUC7  
MUCL1  
MVD  
MVK  
MYBPC1  
MYC  
MYEOV  
MYH11  
MYH14  
MYOC  
MYOCD  
MYRIP  
N4BP3  
NAMPT  
NAMPTP1  
NBL1  
NCALD  
NCMAP  
NCOA7  
NDUFS7  
NEAT1  
NEBL  
NEDD9  
NFATC1  
NFATC2  
NFIL3  
NFKBIZ  
NGFR  
NIPAL4  
NMU  
NNAT  
NOD2  
NOS1  
NOV  
NQO1  
NQO2  
NR1H3  
NR4A1  
NR4A2  
NR4A3  
NRARP

NRG1  
NRG2  
NSDHL  
NTRK2  
NUDT8  
NXPH3  
OGN  
OLAH  
OPRPN  
OSBPL6  
OTOGL  
OTUB2  
OVOL1  
P2RY2  
PADI1  
PADI2  
PAFAH2  
PALMD  
PANK1  
PARVB  
PC  
PCCB  
PCDH7  
PCK1  
PCK2  
PCOLCE2  
PCP4  
PCP4L1  
PCSK2  
PCTP  
PDE1B  
PDE4D  
PDE6A  
PDK4  
PDLIM3  
PDZK1  
PDZK1IP1  
PECR  
PERM1  
PEX11A  
PEX16  
PEX3  
PFKFB3  
PHLDA2  
PHLDB3  
PI16  
PIGR  
PIM3  
PIP  
PIR  
PITX1  
PKDCC  
PKIB  
PKLR  
PLA2G16  
PLA2G2A



PLA2G3  
PLA2G4E  
PLA2G4F  
PLA2G7  
PLA2R1  
PLAC9  
PLCB4  
PLCH2  
PLEKHB1  
PLEKHG1  
PLEKHG6  
PLEKHH1  
PLEKHN1  
PLIN1  
PLIN2  
PLIN4  
PLIN5  
PLLP  
PLN  
PLPP2  
PLXNA4  
PM20D1  
PMP2  
PMVK  
PNLIPRP3  
PNP  
PNPLA3  
PNPLA5  
PON3  
PPARG  
PPARGC1A  
PPIF  
PPM1K  
PPP1R14A  
PPP1R15A  
PPP1R1A  
PPP1R1B  
PPP1R3C  
PPP3CA  
PRLR  
PRNP  
PROM1  
PROM2  
PRR15L  
PRR9  
PRRG2  
PSAPL1  
PSORS1C2  
PTGIS  
PTK6  
PTP4A1  
PVT1  
PXMP4  
RABEPK  
RAPGEFL1  
RARRES1

RASSF10  
RASSF6  
RBM24  
RBP4  
RBP7  
RDH12  
REEP6  
RELN  
RETSAT  
RGS2  
RHBDL2  
RHCG  
RHOV  
RHPN2  
RILP  
RIN1  
RND1  
RND3  
RNF125  
RNF128  
ROPN1B  
RORA  
RORC  
ROS1  
RP1-232L22\_\_B.1  
RP1-27K12.4  
RP1-80N2.2  
RP11-1100L3.8  
RP11-255H23.4  
RP11-257I8.2  
RP11-26L20.3  
RP11-295G20.2  
RP11-321G12.1  
RP11-350F16.1  
RP11-367G18.1  
RP11-379F4.4  
RP11-386B13.4  
RP11-398B16.2  
RP11-459E5.1  
RP11-486M23.1  
RP11-508M8.1  
RP11-50D9.3  
RP11-521D12.5  
RP11-532F12.5  
RP11-568K15.1  
RP11-61I13.3  
RP11-660L16.2  
RP11-678G14.3  
RP11-6N17.4  
RP11-734K21.5  
RP11-800A3.4  
RP13-392I16.1  
RP3-429O6.1  
RP5-839B4.8  
RPH3AL  
RPS6KL1

RRAD  
RRAGD  
RTN4  
S100A3  
S100P  
S1PR1  
SAA1  
SAA2  
SC5D  
SCARA5  
SCEL  
SCGB1B2P  
SCGB1D2  
SCGB2A1  
SCGB2A2  
SCIN  
SCN4A  
SCN7A  
SCNN1A  
SCNN1B  
SCRG1  
SDCBP2  
SDPR  
SDR16C5  
SEC14L4  
SEC14L6  
SELENBP1  
SEMA3G  
SERPINA3  
SERPINB2  
SERPINB5  
SERTAD1  
SESN2  
SEZ6L  
SFN  
SGCA  
SGCG  
SGK1  
SGK2  
SGPP2  
SHROOM3  
SIK1  
SLC10A6  
SLC12A2  
SLC13A2  
SLC15A1  
SLC16A7  
SLC19A3  
SLC1A5  
SLC22A3  
SLC25A18  
SLC25A25  
SLC25A34  
SLC25A35  
SLC26A3  
SLC27A2

SLC27A6  
SLC28A3  
SLC29A2  
SLC2A14  
SLC2A4  
SLC34A2  
SLC35F2  
SLC39A8  
SLC41A1  
SLC43A1  
SLC44A3  
SLC45A4  
SLC46A3  
SLC47A1  
SLC6A17  
SLC9A2  
SLITRK4  
SMOC1  
SNAI1  
SOAT1  
SOCS3  
SOD2  
SORBS2  
SOWAHB  
SOX17  
SOX21-AS1  
SOX21  
SOX6  
SOX7  
SOX8  
SP6  
SPDEF  
SPINK5  
SPRR4  
SPRY2  
SPTBN5  
SQRDL  
SRD5A1  
SRD5A3  
SRL  
ST6GALNAC4  
STARD5  
STEAP3  
STEAP4  
STX11  
STXBP6  
SULT2B1  
SUOX  
SV2B  
SYN2  
SYNM  
SYNPO2  
SYPL2  
SYT12  
SYT7  
TACSTD2

TBC1D4  
TCEA3  
TCHH  
TECRP1  
TESC  
TF  
TG  
TGFA  
TGFBR3  
TGM5  
THEM5  
THRSP  
TIMP4  
TINAGL1  
TIPARP  
TJP3  
TKT  
TLCD1  
TM7SF2  
TMEM132C  
TMEM164  
TMEM189  
TMEM213  
TMEM246  
TMEM254  
TMEM30B  
TMEM40  
TMEM45A  
TMEM47  
TMEM56  
TMEM63C  
TMEM91  
TMEM97  
TMPRSS11E  
TMPRSS2  
TMPRSS6  
TNFAIP3  
TNFRSF10A  
TNFRSF10B  
TNFRSF18  
TNFRSF1B  
TNMD  
TNNC1  
TNNC2  
TNNT1  
TNS4  
TOB1  
TOM1  
TPD52L1  
TPPP  
TPPP3  
TRDN  
TRHDE-AS1  
TRHDE  
TRIB1  
TRIM16

TRIM47  
TRIM55  
TRIM7  
TSHZ2  
TSPAN1  
TST  
TTC38  
TTC39B  
TTYH1  
TUBB2A  
TUBB2B  
TUSC5  
UAP1  
UBIAD1  
UGT8  
ULK4  
UPB1  
UQCRFS1  
USP2  
VEGFC  
VNN1  
VSIR  
WFDC21P  
WFDC3  
WISP2  
WNT16  
WNT3  
WNT4  
XYLT1  
ZBTB16  
ZBTB7C  
ZC2HC1B  
ZC3H12A  
ZDHC11B  
ZDHC2  
ZFP36  
ZFP36L1  
ZG16B  
ZNF331  
ZNF385D  
ZNF503-AS1  
ZNF725P  
ZNF750

**Supplementary Table 2-7. SCC-UP-mRNA**

AC011288.2  
ACOT11  
ACTR2  
ACTR3  
ADAM10  
ADAM12  
ADAM17  
ADAM9  
ADCY7  
AFAP1L2  
AIM2  
AKR1B10  
AKR1B15  
ALG1L  
AMMECR1  
ANKEF1  
ANLN  
ANXA1  
ANXA3  
APLN  
APOL6  
ARHGAP11A  
ARHGAP11B  
ARL14  
ARNTL2  
ARPC1B  
ARTN  
ASF1B  
ASPM  
ATAD2  
ATP10D  
ATP11B  
AUNIP  
AURKA  
AURKB  
B3GLCT  
B3GNT3  
B3GNT5  
BAIAP2L2  
BAK1  
BICD1  
BIRC5  
BLM  
BLZF1  
BNC1  
BORA  
BPGM  
BRCA2  
BRINP1  
BUB1  
BUB1B  
BZW1P2  
C10orf99  
C12orf75  
C1RL-AS1

C1orf74  
C6orf141  
CA2  
CAB39  
CAP1  
CARD6  
CARHSP1  
CBX2  
CCNA2  
CCNB1  
CCNB2  
CCNE1  
CCNE2  
CCNYL1  
CCT5  
CD24P4  
CD47  
CDC20  
CDC25B  
CDC45  
CDC6  
CDCA2  
CDCA3  
CDCA5  
CDCA8  
CDH3  
CDK1  
CDK5R1  
CDKN2A  
CDKN2B  
CDKN3  
CEACAM19  
CENPA  
CENPE  
CENPF  
CENPI  
CENPK  
CENPL  
CENPN  
CEP55  
CHAC2  
CKAP2  
CKAP2L  
CLCA2  
CLDN12  
CLDN17  
CLEC7A  
CLSPN  
CMPK2  
CNDP2  
CNGB1  
CNIH1  
CNTNAP2  
COL22A1  
COL4A5  
COMMD8



CORO6  
CPSF2  
CREG2  
CSNK1A1  
CTD-2196E14.9  
CTD-2510F5.4  
CTPS1  
CTSB  
CTSC  
CUX1  
CXCL13  
CXCL6  
CXCL8  
CXCR1  
CYB5R4  
CYP24A1  
CYP27B1  
CYP4F11  
DCBLD1  
DDIAS  
DDX58  
DDX60  
DDX60L  
DEFB4A  
DEFB4B  
DENND1B  
DEPDC1  
DEPDC1B  
DFNA5  
DIAPH3  
DLEU2  
DLGAP5  
DLX6-AS1  
DNA2  
DNMT3B  
DSC2  
DSG3  
DTL  
DTX3L  
DYNLT3  
E2F7  
EAF2  
ECT2  
EGFL6  
EHBP1L1  
EIF2AK2  
EIF4EBP1  
ENAH  
ENKUR  
ENTPD7  
EPGN  
EPSTI1  
ERCC6L  
ERI2  
ERO1A  
ERVMER34-1

ESCO2  
ESM1  
EXO1  
EXT2  
FABP5  
FABP5P7  
FAM111B  
FAM126A  
FAM217B  
FAM49B  
FAM72B  
FAM83A-AS1  
FAM83A  
FAM83D  
FANCI  
FBLIM1  
FBN2  
FBXO45  
FERMT1  
FLRT3  
FMNL2  
FOLR3  
FOXM1  
FOXN2  
FRMD6  
FRRS1  
FSCN1  
FUT2  
FUT3  
FZD6  
GALE  
GALNT3  
GALNT6  
GART  
GBP3  
GBP6  
GGH  
GINS1  
GJA1  
GJB2  
GJB6  
GLO1  
GLRX3  
GNG4  
GNPNAT1  
GPR1  
GPRIN1  
GPSM2  
GRN  
GSG2  
GSTP1  
GTSE1  
GZMA  
HAPLN1  
HAS3  
HDAC1

HEPHL1  
HERC6  
HIF1A  
HJURP  
HK2  
HMMR  
HN1  
HN1L  
HOMER3  
HORMAD1  
HS3ST3A1  
HSPA8  
HSPH1  
HTATIP2  
HTR7  
IFI27  
IFI44  
IFI6  
IFIH1  
IFIT1  
IFIT3  
IFIT5  
IGF2BP3  
IGFL1  
IL11  
IL12RB2  
IL13RA1  
IL1A  
IL1B  
IL24  
IL4R  
INCENP  
IQGAP3  
ISG15  
ITGA3  
ITGA6  
ITGAV  
KCNJ15  
KCNK1  
KCNK10  
KCP  
KIAA1524  
KIF11  
KIF14  
KIF18A  
KIF18B  
KIF20A  
KIF20B  
KIF23  
KIF2C  
KIF4A  
KIFC1  
KLF7  
KLK12  
KLRC1  
KNL1

KRT16  
KRT16P3  
KRT16P5  
KRT16P6  
KRT6A  
KRT6B  
KRT6C  
KYNU  
LAMA3  
LAMB3  
LAMC2  
LAMP5  
LEMD1  
LGALS9B  
LGALS9C  
LIG4  
LIMK1  
LINC00649  
LINC00707  
LINC00941  
LINC01094  
LINC01343  
LINC01605  
LINP1  
LPAR3  
LPCAT1  
LRAT  
LRIF1  
LRRC8D  
LTBP1  
LYN  
LYPLA1  
MAD2L1  
MALL  
MAP4K4  
MAPK6  
MARK1  
MARVELD3  
MB21D1  
MCM10  
MDFI  
MELK  
MEMO1P1  
MET  
MISP  
MKI67  
MMP1  
MMP10  
MMP11  
MMP13  
MMP3  
MMP9  
MOB1A  
MOCOS  
MPZL2  
MREG

MSL3P1  
MTCL1  
MTFR1  
MTFR2  
MTPN  
MX1  
MXD1  
MYBL2  
MYO1B  
MYO5A  
MYOM3  
NAV1  
NCAPG  
NCAPG2  
NCAPH  
NDC80  
NDUFA4L2  
NEIL3  
NEK2  
NETO2  
NLGN4X  
NMI  
NREP  
NRIP1  
NUAK2  
NUF2  
NUP155  
NUP37  
NUSAP1  
OAS1  
OAS2  
OAS3  
OASL  
OCIAD2  
OIP5  
ORC1  
ORC6  
P2RY1  
P2RY2  
P2RY6  
P4HA2  
PARP12  
PARP14  
PARP9  
PARPBP  
PBK  
PCLAF  
PCSK6  
PCSK9  
PDP1  
PDPN  
PDZK1IP1  
PGBD5  
PGM2  
PI15  
PI3

PIF1  
PIK3CD  
PITX1  
PKM  
PKMYT1  
PLEK2  
PLK1  
PLS3  
PMM2  
POLQ  
POLR3G  
POPDC3  
PPP2R2C  
PPP4R1  
PRDM1  
PRKCQ-AS1  
PRKCQ  
PRMT3  
PRR11  
PRRG4  
PTAFR  
PTBP3  
PTGFRN  
PTHLH  
PTK7  
PTTG1  
PYGL  
RAB10  
RAB31  
RABIF  
RAC2  
RACGAP1  
RAD51  
RAD51AP1  
RAET1G  
RAET1L  
RALB  
RB1  
RBM41  
RDH16  
RGS20  
RIMS2  
RIMS3  
RMI1  
RP11-10C24.3  
RP11-145A3.1  
RP11-218E20.3  
RP11-276H19.2  
RP11-277P12.20  
RP11-2711.4  
RP11-424C20.2  
RP11-490H24.5  
RP11-527N22.2  
RP11-603B24.1  
RP11-624L4.1  
RP11-800A3.4

RP11-887P2.3  
RP13-463N16.6  
RP4-794H19.1  
RP5-884M6.1  
RPS6KA4  
RRM2  
RSAD2  
RTKN2  
RTP4  
S100A11  
S100A12  
S100A7A  
S100A8  
S100A9  
SAMD9  
SCG5  
SERINC2  
SERPINB1  
SERPINB13  
SEZ6L2  
SFT2D2  
SFXN1  
SGO1  
SGO2  
SH2D2A  
SH2D5  
SKA1  
SKA3  
SKP2  
SLAMF7  
SLC12A6  
SLC16A1  
SLC16A9  
SLC22A23  
SLC25A24  
SLC28A3  
SLC2A1  
SLC2A9  
SLC35D1  
SLC36A1  
SLC38A7  
SLC38A9  
SLC39A6  
SLC4A8  
SLC6A11  
SLC7A11  
SLC7A5  
SLFN5  
SLITRK6  
SLPI  
SMC4  
SNX10  
SOX2  
SP110  
SPC25  
SPDL1

SPINK6  
SPP1  
SPRR2A  
SPRR3  
SQLE  
SSX2IP  
ST6GALNAC1  
STARD4-AS1  
STARD4  
STAT1  
STIL  
STK17A  
STON2  
STPG1  
STRIP2  
STXBP5-AS1  
SULF2  
TACC3  
TARS  
TCN1  
TDO2  
TENM2  
TGFA  
TICRR  
TIGAR  
TLDC1  
TLR6  
TM4SF19  
TMC7  
TMEM117  
TMEM132A  
TMEM165  
TMEM171  
TMEM87B  
TMEM92  
TMPRSS11A  
TMPRSS11D  
TMPRSS4  
TMT3  
TNC  
TNFRSF21  
TNFSF10  
TNIP3  
TOP2A  
TOR4A  
TPBG  
TPX2  
TREM1  
TRIM14  
TRIM16L  
TRIM56  
TRIM59  
TRIP13  
TROAP  
TSPAN10  
TTK



TUBA1C  
TWF1  
TWF1P1  
TXNDC17  
TXNDC9  
TYMP  
UBA6  
UBASH3B  
UBE2C  
UBE2Q2  
UBE2T  
UHMK1  
ULBP2  
ULBP3  
UNC5B  
UPP1  
USB1  
VAV2  
VLDLR  
VRK2  
WASHC4  
WDHD1  
WDR66  
WDR91  
WISP1  
WNT5A  
XAF1  
XDH  
XPR1  
XRCC2  
YWHAQ  
YWHAZ  
YWHAZP3  
ZBED9  
ZDHHC20  
ZMPSTE24  
ZNF114  
ZNF185  
ZNF770  
ZNF812P  
ZNF860  
ZSCAN31

**Supplementary Table 2-8. SCC-DOWN-mRNA**

AARD  
ABCA10  
ABCA2  
ABCA3  
ABCA4  
ABCA6  
ABCA8  
ABCA9  
ABCC6  
ABHD14B  
ABHD6  
ABI3BP  
AC007969.5  
AC074289.1  
ACACB  
ACADL  
ACADSB  
ACAT1  
ACCS  
ACKR1  
ACOT2  
ACOX2  
ACSF2  
ACSS2  
ACSS3  
ACTA2  
ACTG2  
ACVR2A  
ADAM22  
ADAM33  
ADAMTS10  
ADAMTS18  
ADAMTS3  
ADAMTS8  
ADAMTS9-AS2  
ADAMTS9  
ADAMTSL1  
ADCY2  
ADCY4  
ADCY5  
ADCY6  
ADCY8  
ADCYAP1R1  
ADD3  
ADGRA2  
ADGRD1  
ADGRL3  
ADH1B  
ADIPOQ  
ADORA1  
ADRA2C  
ADRB1  
AFF2  
AFF3  
AFMID

AGFG2  
AGTR1  
AKAP1  
AKAP12  
ALDH1A1  
ALDH1L1  
ALDH2  
ALDH3A2  
ALDH6A1  
ALDOC  
ALKAL2  
ALKBH7  
ALX4  
AMIGO1  
AMOT  
AMOTL2  
AMY2B  
AMZ2P1  
ANG  
ANGPTL1  
ANGPTL2  
ANGPTL5  
ANGPTL7  
ANK2  
ANKRD37  
ANKS1B  
ANXA6  
AOC3  
AOX1  
APBB1  
APOD  
APOE  
APOLD1  
AQP1  
AQP7  
AR  
ARC  
ARFGEF3  
ARHGAP24  
ARHGAP31  
ARHGEF15  
ARHGEF26  
ARHGEF40  
ARHGEF6  
ARL2  
ARMCX2  
ARMCX3  
ARMCX4  
ARMCX6  
ARNT2  
ASGR2  
ASPA  
ATF3  
ATOH8  
ATP10A  
ATP13A5

ATP1A2  
ATP1B2  
ATP2A3  
ATP5D  
ATP5L  
ATP6V0A4  
ATP6V0E2  
ATP6V1B1  
AVPI1  
AWAT2  
AXIN2  
BACH2  
BAG1  
BBC3  
BCAN  
BCAS1  
BCKDHB  
BCL2  
BCL6  
BCL6B  
BDH2  
BEND7  
BEST1  
BEX4  
BEX5  
BICC1  
BNC2  
BOC  
BTG2  
BTNL9  
C10orf10  
C10orf90  
C11orf96  
C12orf57  
C14orf132  
C14orf159  
C15orf59  
C16orf45  
C16orf89  
C1QTNF12  
C1QTNF3  
C1QTNF7  
C1orf115  
C21orf33  
C2orf40  
C2orf72  
C2orf82  
C2orf88  
C3  
C3orf18  
C6orf48  
C7  
C9orf152  
CA11  
CA13  
CA14

CA3  
CA4  
CA6  
CA8  
CAB39L  
CABLES1  
CACNA1D  
CACNA1G  
CACNA1H  
CACNA2D2  
CACNB1  
CACNB2  
CADM2  
CAMK2B  
CAPN6  
CARN5  
CASKIN2  
CBX6  
CBX7  
CCDC106  
CCDC129  
CCDC3  
CCDC80  
CCDC85B  
CCER2  
CCL19  
CCL2  
CD200  
CD27-AS1  
CD300LG  
CD302  
CD34  
CD55  
CDC42EP4  
CDH12  
CDH19  
CDH22  
CDH23  
CDIP1  
CDKN1C  
CDON  
CDR1  
CEBPD  
CELF2  
CEP126  
CFD  
CFTR  
CGNL1  
CHAD  
CHADL  
CHCHD10  
CHDH  
CHGA  
CHKA  
CHPT1  
CHRD

CHRD1  
CHRM1  
CIDEA  
CILP  
CIRBP  
CITED2  
CKB  
CKMT2  
CLDN10  
CLDN11  
CLDN5  
CLDN8  
CLEC3B  
CLIC6  
CLIP3  
CLSTN2  
CLU  
CLYBL  
CMAHP  
CMTM7  
CNKSR2  
CNN1  
CNRIP1  
CNTFR  
CNTN2  
CNTN3  
COCH  
COL14A1  
COL21A1  
COL28A1  
COL9A3  
COMP  
COQ8A  
CORIN  
COX7A1  
CP  
CPAMD8  
CPED1  
CPQ  
CPS1  
CPXM2  
CRACR2A  
CRACR2B  
CREB5  
CRELD1  
CRIP2  
CRISPLD2  
CRTAC1  
CRY2  
CRYAB  
CRYM  
CSRNP1  
CSRNP3  
CSRNP1  
CTB-176F20.3  
CTD-2287O16.1

CTF1  
CTGF  
CTNND2  
CTSF  
CTSK  
CTTNBP2  
CX3CL1  
CXCL12  
CXorf36  
CYB5A  
CYBRD1  
CYGB  
CYP1B1  
CYP27A1  
CYP2U1  
CYP2W1  
CYP4B1  
CYP4F12  
CYP4V2  
CYP4X1  
CYR61  
CYSTM1  
D2HGDH  
DAAM2  
DACT3  
DBP  
DCD  
DCHS1  
DCLK1  
DCN  
DCXR  
DDAH1  
DDAH2  
DDIT4L  
DDO  
DDR2  
DENND2A  
DEPTOR  
DES  
DGAT2  
DGCR6  
DHRS12  
DIAPH2  
DIRAS3  
DISP1  
DIXDC1  
DKK2  
DLG2  
DLG4  
DMD  
DNAJC4  
DNALI1  
DNM1  
DPP6  
DPP7  
DPT

DPYSL2  
DPYSL3  
DTNA  
DTX4  
DUSP1  
DUSP2  
DUSP4  
DUSP5  
DUSP8  
DZIP1L  
ECH1  
ECHDC2  
ECHDC3  
ECI2  
ECSCR  
EDA  
EDN3  
EDNRB  
EEF1B2P6  
EEPD1  
EFEMP2  
EFHC2  
EFHD1  
EFNA5  
EFNB3  
EGR1  
EGR2  
EGR3  
EIF3L  
ELN  
EMCN  
EMID1  
EMILIN3  
EMP1  
EMP2  
EMX2  
EMX2OS  
ENPP1  
ENPP2  
ENPP3  
ENPP4  
ENPP5  
EPB41L4A-AS1  
EPDR1  
EPA7  
EPHX1  
EPHX2  
EPS8  
ERBB4  
ESRRG  
ETV1  
ETV5  
EVA1C  
EVC2  
EXTL1  
F10



F5  
FABP4  
FABP7  
FADS2  
FAHD2A  
FAHD2B  
FAM107A  
FAM110D  
FAM117A  
FAM124A  
FAM13A  
FAM149A  
FAM153B  
FAM166B  
FAM171A1  
FAM174B  
FAM180A  
FAM180B  
FAM189A2  
FAM198A  
FAM19A2  
FAM221A  
FAM65B  
FAM69B  
FAM69C  
FARP1  
FAXDC2  
FBLN1  
FBLN5  
FBN3  
FBXL7  
FCGRT  
FES  
FGD5  
FGF10  
FGF14  
FGF2  
FGF7  
FGFBP2  
FGFR1  
FGFRL1  
FHIT  
FHL1  
FIBIN  
FLNC  
FMO5  
FN3K  
FNDC4  
FNDC5  
FOLR1  
FOS  
FOSB  
FOXC1  
FOXI1  
FREM1  
FRY

FRZB  
FUZ  
FXYD6  
FZD1  
FZD4  
FZD7  
GAB2  
GABARAPL1  
GABRP  
GADD45B  
GAL3ST4  
GALNT16  
GAMT  
GAS6  
GAS7  
GATA6  
GCHFR  
GCNT2  
GDPD5  
GFRA1  
GFRA3  
GGT7  
GGTA1P  
GIPC2  
GKAP1  
GLI2  
GLIPR1L2  
GLRB  
GLTSCR2  
GLUL  
GLYATL2  
GMPR  
GNAZ  
GNE  
GNG2  
GNG7  
GPC3  
GPC4  
GPC6  
GPD1  
GPD1L  
GPR12  
GPRASP1  
GPRASP2  
GPRC5B  
GPRC5C  
GPT  
GPX4  
GRASP  
GRB14  
GREM2  
GRIA2  
GRIA4  
GRIK3  
GRIN2A  
GS1-358P8.4

GSN  
GSPT2  
GSTA3  
GSTM2  
GSTM3  
GSTM4  
GSTM5  
GULP1  
GXYLT2  
GYG2  
GYPC  
H6PD  
HAAO  
HABP4  
HADH  
HAS1  
HBA1  
HBA2  
HDAC5  
HEPH  
HES1  
HIBADH  
HID1  
HIGD2A  
HLF  
HMCN1  
HMCN2  
HMGCS2  
HMGNS  
HNMT  
HPSE2  
HRASLS5  
HRC  
HSD11B1  
HSD11B2  
HSD17B14  
HSD17B8  
HSF4  
HSPA12B  
HSPB7  
HUNK  
ICA1  
ICAM2  
ICOSLG  
ID4  
IGF1  
IGFBP4  
IGFBP5  
IL11RA  
IL17RC  
IL17RE  
IL34  
INAFM1  
INHBB  
INMT  
INSIG1

INSR  
IQGAP2  
IRF4  
IRS2  
IRX3  
IRX6  
ISM1  
ISOC1  
ISYNA1  
ITGA7  
ITGA9  
ITGBL1  
ITIH5  
ITM2A  
ITPKB  
IVD  
JADE1  
JAM2  
JAM3  
JDP2  
JUNB  
JUND  
KCNA6  
KCNAB1  
KCNB1  
KCNIP2  
KCNIP3  
KCNK2  
KCNK5  
KCNMB1  
KCNMB4  
KCNN4  
KCNQ4  
KDM6B  
KIAA1211L  
KIAA1324  
KIAA1549  
KIAA1683  
KIAA2022  
KIF1A  
KIF26A  
KIT  
KLB  
KLF15  
KLF2  
KLF3-AS1  
KLF4  
KLF9  
KLHL29  
KLK1  
KRT77  
KRT8  
LAMA2  
LAMB2  
LDB3  
LDOC1

LFNG  
LGALS12  
LGI3  
LGI4  
LGR5  
LGR6  
LIF  
LIMS2  
LINC00681  
LINC00885  
LINC01235  
LINC01314  
LINC01315  
LINC02202  
LINGO1  
LMCD1  
LMF1  
LMO3  
LMOD1  
LONRF1  
LONRF2  
LONRF3  
LOXL1  
LOXL4  
LPL  
LRIG1  
LRP1B  
LRP3  
LRRC17  
LRRC2  
LRRC32  
LRRN1  
LRRN4CL  
LSAMP  
LSP1  
LTBP3  
LTBP4  
LYRM9  
LZTS1  
LZTS3  
MAATS1  
MACROD1  
MACROD2  
MAGI1  
MAGI2-AS3  
MAMDC2  
MAML2  
MAMLD1  
MAN1C1  
MAN2A2  
MAOB  
MAP1A  
MAP1B  
MAP2K3  
MAP3K8  
MAP6

MAPK4  
MAPK8IP1  
MAPT

2-Mar

MATN2  
MATN4  
MCF2L  
MEDAG  
MEF2C  
MEF2D  
MEG3  
MEGF6  
MELTF  
MEOX1  
MEOX2  
METRNL  
METTL7A  
MFAP4  
MFSD4A  
MGAT3  
MGP  
MICU3  
MIR99AHG  
MISP3  
MITF  
MLPH  
MLXIPL  
MMRN1  
MOGAT2  
MPC1  
MPDZ  
MPPED1  
MPPED2  
MPZ  
MRAS  
MRGPRF  
MRPS26  
MSRA  
MT-ATP6  
MT-ATP8  
MT-CO1  
MT-CO2  
MT-CO3  
MT-CYB  
MT-ND1  
MT-ND2  
MT-ND3  
MT-ND4  
MT-ND4L  
MT-ND5  
MT-ND6  
MT-RNR1  
MT-RNR2  
MT-TP  
MT1A  
MT1M

MT1X  
MTATP6P1  
MTCO1P12  
MTMR9LP  
MTND1P23  
MTND2P28  
MTURN  
MUC7  
MVB12B  
MXRA8  
MYADM  
MYBPC1  
MYC  
MYEF2  
MYEOV  
MYH11  
MYL5  
MYL9  
MYLK  
MYO15B  
MYO3A  
MYO5C  
MYOCD  
MYOM1  
MYOZ1  
MYRIP  
N4BP2L1  
N4BP3  
NACAD  
NALCN  
NAP1L3  
NAP1L5  
NAT6  
NAT8L  
NBEA  
NBL1  
NCALD  
NCAM2  
NCMAP  
NDNF  
NDRG2  
NECAB1  
NEDD9  
NEGR1  
NEIL1  
NFATC1  
NFATC2  
NFIA  
NFIB  
NFIC  
NFIK  
NINJ1  
NISCH  
NLGN1  
NLGN3  
NNAT

NNMT  
NOS1  
NOSTRIN  
NOTCH4  
NOV  
NOVA1  
NPDC1  
NPIPA1  
NPIPA5  
NPIPP1  
NPR1  
NPR2  
NPTXR  
NPY1R  
NR1H3  
NR2F1  
NR3C2  
NR4A1  
NR4A2  
NR4A3  
NRARP  
NRG2  
NRN1  
NRXN1  
NRXN3  
NTF3  
NTN4  
NTRK2  
NTRK3  
NUPR1  
NXPH3  
NYNRIN  
OBSL1  
OCA2  
ODF3L1  
OGN  
OLFM2  
OLFML3  
OMD  
OPHN1  
OSER1-AS1  
OSR1  
OSR2  
OVGP1  
OXER1  
OXGR1  
P3H3  
P4HTM  
PADI2  
PALM  
PALMD  
PAMR1  
PARD3B  
PARK2  
PARM1  
PAX3



PCAT19  
PCCA  
PCDH19  
PCDHB4  
PCK1  
PCOLCE  
PCP4  
PCSK2  
PDCD4  
PDE1A  
PDE1B  
PDE2A  
PDE4B  
PDE4D  
PDE9A  
PDGFD  
PDGFRL  
PDK4  
PDLIM2  
PDLIM3  
PDLIM4  
PDZD4  
PDZRN3  
PDZRN4  
PEBP1  
PEBP4  
PECR  
PEG10  
PELI2  
PEMT  
PER1  
PER2  
PGM5  
PGR  
PHF1  
PHGDH  
PHKG1  
PHLPP1  
PHYH  
PHYHD1  
PHYHIP  
PI16  
PID1  
PIFO  
PIGR  
PIK3R1  
PIM3  
PIP  
PIP5K1B  
PKD1  
PKDCC  
PKN1  
PKNOX2  
PLA2G16  
PLA2G2A  
PLA2G4C

PLA2G6  
PLAC9  
PLCB4  
PLCE1  
PLCXD3  
PLEKHB1  
PLEKHH2  
PLIN1  
PLIN2  
PLIN4  
PLL  
PLN  
PLP1  
PLPP1  
PLPP3  
PLXNA4  
PMP2  
PMP22  
PNPLA2  
PNPLA7  
PODN  
POLRMT  
POU6F1  
PPARG  
PPARGC1A  
PPM1H  
PPM1L  
PPM1M  
PPOX  
PPP1R15A  
PPP1R16A  
PPP1R1A  
PPP1R1B  
PPP1R9A  
PRELP  
PREX2  
PRG4  
PRKAG2-AS1  
PRKAR2B  
PRKD1  
PROM1  
PRR4  
PRRG3  
PRRT1  
PRX  
PSIP1  
PTCH1  
PTCH2  
PTGDS  
PTGFR  
PTGIS  
PTH1R  
PTN  
PTPRM  
PTPRT  
PWAR6

PYGM  
PYROXD2  
QDPR  
RAB17  
RAB3A  
RAB3IL1  
RAB40B  
RAB6B  
RABL2A  
RAI2  
RAMP2  
RARA  
RASA4  
RASD1  
RASGRF2  
RASL11A  
RBM24  
RBP4  
RBP7  
RBPMS2  
RCAN2  
RCL1  
RDH5  
RECK  
REEP2  
RELN  
RERG  
RERGL  
RETSAT  
RFNG  
RFX2  
RFX3  
RGAG4  
RGCC  
RGMA  
RGMB  
RGN  
RGS2  
RGS22  
RHOBTB3  
RHOJ  
RHOXF1-AS1  
RILP  
RNF122  
RNF125  
RNF150  
RNF165  
RNF180  
ROBO2  
ROPN1  
ROPN1B  
ROR1  
RP1-239B22.5  
RP1-257A7.5  
RP11-1100L3.8  
RP11-141015.1

RP11-161M6.2  
RP11-175B9.3  
RP11-20024.4  
RP11-234A1.1  
RP11-285F7.2  
RP11-310K10.1  
RP11-321G12.1  
RP11-363E7.4  
RP11-420A23.1  
RP11-466H18.1  
RP11-543P15.1  
RP11-553L6.5  
RP11-568K15.1  
RP11-617F23.1  
RP11-632C17\_\_A.1  
RP11-694I15.7  
RP11-726G1.1  
RP11-747H7.3  
RP11-761N21.2  
RP11-774O3.3  
RP11-834C11.4  
RP11-983P16.4  
RP3-406A7.7  
RP3-417G15.1  
RP4-706A16.3  
RPH3AL  
RPL10A  
RPL10P9  
RPL13  
RPL13A  
RPL13AP5  
RPL13P12  
RPL15  
RPL15P3  
RPL23  
RPL26  
RPL26P19  
RPL29  
RPL3  
RPL31  
RPL32  
RPL34  
RPL37A  
RPL3P4  
RPL4P4  
RPS15  
RPS15A  
RPS23  
RPS23P8  
RPS24  
RPS25  
RPS27  
RPS4X  
RPS6  
RPS8  
RPS9

RRAGD  
RSAD1  
RSPO1  
RSPO3  
RUNX3  
RUSC2  
RXRG  
SALL2  
SAMD5  
SBK1  
SBSPON  
SCAP  
SCARA3  
SCARA5  
SCARB1  
SCGB1B2P  
SCGB1D2  
SCGB2A1  
SCGB2A2  
SCN4A  
SCN4B  
SCN7A  
SCRG1  
SCRN2  
SCUBE2  
SCUBE3  
SDPR  
SELENBP1  
SELENOP  
SELP  
SEMA3D  
SEMA3E  
SEMA3G  
SEMA6A  
SEMA6B  
SEMA6C

4-Sep

SERHL2  
SERPINA5  
SERPINF1  
SESN1  
SETMAR  
SEZ6L  
SFRP1  
SFRP5  
SGCA  
SGCD  
SGCG  
SGSM1  
SH3BGR  
SH3BGRL2  
SH3BP5-AS1  
SH3BP5  
SHC2  
SHC4  
SHE

SHF  
SHISA9  
SHMT1  
SHROOM3  
SIDT2  
SIK1  
SIK2  
SLAIN1  
SLC12A2  
SLC12A7  
SLC13A2  
SLC14A1  
SLC16A11  
SLC16A14  
SLC17A7  
SLC1A2  
SLC1A7  
SLC22A17  
SLC25A23  
SLC25A25  
SLC25A29  
SLC25A4  
SLC25A6  
SLC26A2  
SLC26A7  
SLC27A1  
SLC27A6  
SLC29A1  
SLC29A2  
SLC2A4  
SLC34A2  
SLC35F1  
SLC43A1  
SLC43A3  
SLC45A2  
SLC47A1  
SLC6A4  
SLC7A2  
SLC9A2  
SLCO2A1  
SLCO4A1-AS1  
SLCO4C1  
SLIT2  
SLIT3  
SLITRK2  
SLITRK4  
SMARCA2  
SMARCD3  
SMCO4  
SMIM10  
SMIM10L2A  
SMO  
SMOC2  
SNCA  
SNCG  
SNED1

SNHG5  
SNHG6  
SNHG8  
SNRK  
SNTB1  
SNX21  
SOBP  
SOCS3  
SOD3  
SORBS1  
SORBS2  
SORBS3  
SORCS1  
SOSTDC1  
SOX10  
SOX13  
SOX17  
SOX5  
SOX8  
SOX9-AS1  
SOX9  
SPARCL1  
SPATA13  
SPATA6  
SPDEF  
SPRY1  
SPRY2  
SPTBN1  
SPTBN4  
SRF  
SRL  
SSBP2  
SSC5D  
ST3GAL4  
ST6GAL1  
STAB2  
STAC2  
STAT5A  
STK32A  
STK32B  
STMN2  
STMN3  
STOX1  
STUM  
STXBP6  
SUSD2  
SV2B  
SVEP1  
SVIP  
SYBU  
SYN2  
SYNE1  
SYNE3  
SYNGR1  
SYNPO2  
SYT17

TAC1  
TACR1  
TAGLN  
TBC1D16  
TBC1D4  
TCEA3  
TCEAL2  
TCEAL3  
TCEAL7  
TCF7L1  
TCF7L2  
TECRP1  
TESC  
TFAP2B  
TFF3  
TG  
TGFBR3  
THBS4  
THRA  
THRSP  
TIMP2  
TIMP4  
TK2  
TLE2  
TMA7  
TMC4  
TMEM100  
TMEM116  
TMEM119  
TMEM132C  
TMEM133  
TMEM139  
TMEM150C  
TMEM178A  
TMEM213  
TMEM220  
TMEM231  
TMEM25  
TMEM47  
TMEM55A  
TMEM56  
TMEM8B  
TMEM98  
TMOD1  
TMPRSS2  
TMPRSS5  
TMPRSS6  
TMTc1  
TNFRSF14  
TNFSF12  
TNMD  
TNN  
TNNC1  
TNNC2  
TNNT2  
TNNT3



TNRC6C  
TNS1  
TNS2  
TNXB  
TOB1  
TOMM7  
TP53  
TP73-AS1  
TPPP  
TPPP3  
TRAPPC6A  
TRES1  
TRIM63  
TRIM8  
TRO  
TRPC1  
TRPM1  
TRPV4  
TRPV6  
TSC22D1  
TSC22D3  
TSHZ1  
TSPAN12  
TSPAN18  
TSPAN4  
TSPAN8  
TSPOAP1  
TSPYL2  
TTC28  
TTC38  
TTC3P1  
TTYH1  
TUB  
TUBA1A  
TUSC5  
UBE2QL1  
UNC5C  
USP11  
USP13  
USP36  
USP54  
UST  
VAMP2  
VAMP5  
VASN  
VEGFB  
VEPH1  
VIM  
VPS51  
VSIG8  
VTCN1  
WBSCR17  
WFDC2  
WFDC3  
WIF1  
WIPF3

WISP2  
WNK2  
WSCD1  
WTIP  
XPNPEP2  
YPEL4  
ZBED3  
ZBTB10  
ZBTB16  
ZBTB47  
ZCCHC24  
ZDHC11  
ZDHC11B  
ZDHC15  
ZEB2  
ZFP36  
ZFP36L1  
ZFP36L2  
ZG16B  
ZIK1  
ZMAT1  
ZNF135  
ZNF273  
ZNF331  
ZNF358  
ZNF385D  
ZNF415  
ZNF423  
ZNF471  
ZNF521  
ZNF542P  
ZNF577  
ZNF667-AS1  
ZNF667  
ZNF677  
ZNF703  
ZNF704  
ZNF853  
ZSCAN18

### Supplementary Table 2-9. SCC-overlap

137 common elements in "SCC-UP-H3K27ac" and "SCC-UP-mRNA":

BPGM  
GZMA  
CXCL13  
SLC7A5  
BICD1  
PTGFRN  
CAB39  
CDK5R1  
LRRC8D  
SLC28A3  
HIF1A  
LGALS9B  
PRKCQ  
DENND1B  
FOXN2  
ADAM12  
TDO2  
NRIP1  
TLDC1  
GJB6  
CREG2  
CAP1  
POPDC3  
RIMS3  
RTKN2  
MAPK6  
STARD4  
NREP  
HSPA8  
PRDM1  
ARTN  
SLC16A1  
NUAK2  
IFI44  
PARP14  
MMP3  
BLZF1  
PCSK6  
VRK2  
PLK1  
BRCA2  
DCBLD1  
S100A12  
SULF2  
FRMD6  
TARS  
ESM1  
FZD6  
S100A8  
KLF7  
SLC16A9  
SLC36A1  
ACTR3

191 common elements in "SCC-DOWN-H3K27ac" and "SCC-DOWN-mRNA":

PALM  
ZSCAN18  
STK32A  
ATF3  
NTRK2  
NLGN1  
C2orf88  
GALNT16  
ACADL  
FAHD2A  
KLF15  
RFX2  
FOS  
HRASLS5  
GFRA1  
TMEM55A  
CNTFR  
EVA1C  
RNF180  
FOSB  
ALDH3A2  
NFC  
CKB  
SBSPON  
SIK1  
TIMP4  
RRAGD  
NFIB  
TNXB  
SYBU  
SOX13  
ECHDC3  
CTGF  
NACAD  
KCNB1  
NXPH3  
AKAP12  
AOX1  
NTN4  
FAM189A2  
TRPC1  
SOX10  
SLC25A4  
EGR1  
CREB5  
SCARA5  
MAPK4  
TCEAL3  
RBM24  
SHC2  
BACH2  
SLITRK2  
TUB

NEK2  
FAM83D  
GBP6  
P2RY2  
KIFC1  
MREG  
SLFN5  
OASL  
TMPRSS4  
AIM2  
MKI67  
TRIM14  
PIK3CD  
FAM49B  
DLGAP5  
CDK1  
MOCOS  
PLEK2  
WISP1  
SLC2A1  
CENPN  
SLC2A9  
CTSC  
ADCY7  
CORO6  
MOB1A  
OAS1  
STON2  
ZNF114  
SLC4A8  
OAS2  
SERPINB1  
AKR1B15  
WNT5A  
NDC80  
P2RY1  
RMI1  
MYO1B  
GSG2  
SAMD9  
TNIP3  
YWHAQ  
SLAMF7  
GJA1  
MYO5A  
CSNK1A1  
LAMA3  
CNGB1  
PTHLH  
PDP1  
UBASH3B  
MMP13  
CCNE1  
FABP5  
RALB  
IFIH1

PDLIM3  
RELN  
INSR  
CACNB2  
TLE2  
ROBO2  
CYP4B1  
AQP7  
PKNOX2  
CGNL1  
GPRASP2  
GRIK3  
PRRG3  
SNED1  
SOD3  
METRNL  
MCF2L  
SYT17  
EMX2  
ACAT1  
SHF  
HLF  
GAS6  
EMID1  
ZG16B  
MT1M  
CDH22  
ISM1  
EDNRB  
FN3K  
MACROD2  
ANKS1B  
PLCE1  
RBP7  
LONRF3  
FGFR1  
ADCY2  
LTBP4  
ALDH1L1  
CHRM1  
GPT  
TCF7L1  
MEGF6  
EFNA5  
PDK4  
ADCY5  
FGF14  
CYP4V2  
ZDHHC11B  
IRS2  
EXTL1  
CRIP2  
SEMA3G  
ELN  
NPR2  
NCAM2

GPR1  
TENM2  
NCAPH  
SCG5  
PARP12  
ADAM10  
MB21D1  
IQGAP3  
VLDLR  
IFI6  
RAC2  
APOL6  
ATAD2  
GNPNAT1  
LEMD1  
ITGA6  
P4HA2  
TNFRSF21  
MTRF2  
RAD51  
LRIF1  
ENAH  
PARPBP  
MTPN  
STK17A  
ANKEF1  
ANXA3  
GALNT6  
LPCAT1  
ANLN

TMOD1  
NNMT  
GLI2  
NFI  
NBEA  
CDON  
SEMA3D  
TNNC2  
WFDC2  
ST3GAL4  
MPPED2  
HAS1  
PLLP  
HDAC5  
MAMDC2  
BOC  
CDC42EP4  
TPPP  
PER2  
NOVA1  
ESRRG  
RPL32  
LONRF2  
TFAP2B  
CPQ  
NOS1  
TMPRSS2  
ZBTB16  
RAI2  
LRRN1  
RAB17  
HES1  
RGMA  
ZNF135  
NFIA  
ZNF423  
KCNIP3  
DUSP8  
NECAB1  
NR4A1  
SLC47A1  
TNS1  
PPARG  
ATP6V1B1  
BEND7  
SORBS1  
STK32B  
GPX4  
MAMLD1  
IL34  
RUSC2  
HABP4  
ATP5D  
SCARA3  
FNDC4  
TCF7L2

MAP2K3  
EEDP1  
SLC7A2  
PKD1  
FBLN5  
ZBTB10  
ITGBL1  
PRELP  
ZDHHC11  
SSBP2  
MFAP4  
CHDH  
SLC12A7  
CSR1  
TMEM100  
AQP1  
SLIT3  
HMGCS2  
TMEM56  
CRISPLD2  
PDGFRL  
AOC3  
RAB3IL1  
GLUL  
CIDEA  
SCARB1  
STAC2  
CLIC6  
LRP3  
HAAO  
BCL6  
CKMT2  
MEDAG  
INHBB  
SOX9  
ZFP36L1  
ARHGEF26  
KLF4  
CABLES1  
NR2F1  
GMPR  
SYNE1  
PTGIS  
ZNF704  
MEF2D  
CELF2  
KLF2  
ST6GAL1  
TNRC6C  
PIM3  
ID4  
SUSD2  
SMOC2  
UST  
ITIH5  
PDE4B

LRRC32  
ZFP36L2  
STXBP6  
HUNK  
ANGPTL2  
NALCN  
PHGDH  
CLEC3B  
ADRB1  
NEDD9  
CXCL12  
ATOH8  
TGFB3  
DHRS12  
PKDCC  
RCAN2  
TBC1D16

**Supplementary Table 2-10. BCC-overlap**

125 common elements in "BCC-UP-H3K27ac" and "BCC-UP-mRNA":

COL3A1  
SLC7A5  
PRR3  
NOX4  
TRAF3IP3  
CDK5R1  
TOX2  
SLAMF8  
ADAMTS12  
DYRK2  
EFCAB1  
PTPRU  
MEX3B  
TGFB3  
GJB6  
JAG1  
SUPT3H  
DNMT3A  
CCR2  
WNT2  
FZD2  
ZNF618  
COL6A3  
CHST2  
NTM  
SLC1A4  
SPON2  
PSIP1  
TRIB2  
PLXDC1  
PRDM1  
FN1  
DIO2  
ERCC6L2  
ZNF469  
CAMK2G  
IFT80  
COL5A1  
CTHRC1  
PAPPA  
SULF2  
VGLL4  
ADAMTS14  
NRP2  
FAP  
ARHGEF26  
ZNF532  
ZNF697  
GADD45G  
SPECC1  
SH2B2  
MME  
BCL11B

31 common elements in "BCC-DOWN-H3K27ac" and "BCC-DOWN-mRNA":

NTRK2  
KIAA1456  
ADORA2B  
ACADL  
KLF15  
HRASLS5  
KCNK7  
CNTFR  
UAP1  
CKB  
CTGF  
FAM189A2  
RBM24  
RELN  
DBI  
MPV17L  
AGPAT3  
PCOLCE2  
PI16  
DUSP8  
NR4A1  
SLC47A1  
ATP6V1B1  
MOXD1  
ADAMTS15  
HLCS  
ZBTB7C  
KLF2  
STEAP3  
MFSD12  
RRAGD



MMD  
SLC16A9  
PROX1  
DUSP10  
TIGD2  
HMGA2  
DBF4B  
FYN  
C10orf99  
DFNA5  
LAMB1  
FGFR2  
ARL15  
FAM20C  
SACS  
SLC6A1  
IGF2BP2  
DLX2  
NINJ2  
HAPLN1  
BNC2  
MYCN  
EDN2  
SOX4  
PDGFA  
HECW2  
WNT5A  
WISP1  
ZMIZ1  
FMNL3  
MYO1B  
HMCN1  
CACNA2D3  
SAMD9  
CRYL1  
POSTN  
CTBP1  
NREP  
TDO2  
TTC30B  
LASP1  
CEP128  
CDK14  
SLC7A8  
FZD6  
NUAK1  
TGFB1  
CHRD  
TENM2  
ADAMTS2  
KCNU1  
COL27A1  
DIRAS2  
SCN8A  
PELI2  
FSIP2

INHBA  
COL1A1  
CABLES1  
LRIG3  
SETBP1  
EDN1  
OSBPL3  
BASP1  
HSPB3  
FAM76B  
IRX2  
SLC6A11  
CRNN  
DLX1  
B4GALNT3  
EDIL3  
LPCAT1  
UST

Supplementary Table 3. Accession Identifiers

| Donor       | BioSample ID | Biosample term name                  | ChIP-seq antibody |             |             |
|-------------|--------------|--------------------------------------|-------------------|-------------|-------------|
|             |              |                                      | Input control     | H3K27ac     | H3K4me3     |
| ENCDO799UNP | ENCBS238CLI  | keratinocyte squamous cell carcinoma | ENCSR583XAM       | ENCSR958CPV | ENCSR011KBS |
| ENCDO799UNP | ENCBS391IST  | skin epidermis                       | ENCSR578ORB       |             |             |
| ENCDO054KII | ENCBS198XCO  | keratinocyte squamous cell carcinoma | ENCSR306YLG       | ENCSR683RFX | ENCSR291PVS |
| ENCDO054KII | ENCBS792ZTG  | skin epidermis                       | ENCSR360NJD       | ENCSR685XVI |             |
| ENCDO736MLL | ENCBS078OEW  | keratinocyte squamous cell carcinoma | ENCSR906OSH       | ENCSR700LWI |             |
| ENCDO736MLL | ENCBS329VRH  | skin epidermis                       | ENCSR932WVK       | ENCSR697MUJ |             |
| ENCDO588YPS | ENCBS607OCB  | keratinocyte squamous cell carcinoma | ENCSR529OPX       | ENCSR321KDV |             |
| ENCDO588YPS | ENCBS823ZBL  | skin epidermis                       | ENCSR126UEY       | ENCSR214UZE |             |
| ENCDO317WFZ | ENCBS073GVF  | keratinocyte squamous cell carcinoma | ENCSR071DPR       | ENCSR235KRX |             |
| ENCDO317WFZ | ENCBS497HUD  | skin epidermis                       | ENCSR704QBF       | ENCSR386CKJ |             |
| ENCDO856JFL | ENCBS741KVA  | keratinocyte squamous cell carcinoma | ENCSR966IGL       | ENCSR869TDT | ENCSR822EOS |
| ENCDO856JFL | ENCBS115YGN  | skin epidermis                       | ENCSR621OKB       | ENCSR340ZTB |             |
| ENCDO739SDJ | ENCBS606CVB  | keratinocyte basal cell carcinoma    | ENCSR465UAX       | ENCSR531VWS | ENCSR720DYZ |
| ENCDO739SDJ | ENCBS488CYF  | skin epidermis                       | ENCSR247FUH       | ENCSR641YLG | ENCSR835YED |
| ENCDO017WNO | ENCBS649ZPH  | keratinocyte basal cell carcinoma    | ENCSR436NLU       |             |             |
| ENCDO017WNO | ENCBS826CAW  | skin epidermis                       | ENCSR033XKQ       | ENCSR194KGO |             |
| ENCDO615YQP | ENCBS365XEJ  | keratinocyte basal cell carcinoma    | ENCSR111ZAD       | ENCSR560BEL |             |
| ENCDO615YQP | ENCBS214YHD  | skin epidermis                       | ENCSR327PYZ       | ENCSR919BBI |             |
| ENCDO128KBJ | ENCBS786EKF  | keratinocyte basal cell carcinoma    | ENCSR438NOO       | ENCSR207ABA | ENCSR074BEW |
| ENCDO128KBJ | ENCBS550MBO  | skin epidermis                       | ENCSR568JFZ       | ENCSR334DRN |             |
| ENCDO180HAI | ENCBS721DMB  | keratinocyte basal cell carcinoma    | ENCSR785LQK       | ENCSR397NQK |             |
| ENCDO180HAI | ENCBS499OVL  | skin epidermis                       | ENCSR988CHU       | ENCSR156MYA |             |
| ENCDO536XJQ | ENCBS486NQD  | keratinocyte basal cell carcinoma    | ENCSR564GJK       | ENCSR339XMR | ENCSR644SHG |
| ENCDO536XJQ | ENCBS270GKZ  | skin epidermis                       | ENCSR914HOJ       | ENCSR969HBF |             |
